# Supplementary material for: Discovery of lipid-mediated protein-protein interactions in living cells using metabolic labeling with photoactivatable clickable probes
Source: bioRxiv preprint, doi:10.1101/2021.12.15.472799, version 1 (2021-12-15)
Supplement: Supplementary Table S1 [file 472799_file04.xlsx]

## Sheet: Supplementary Table X. X3-8-10 
								SILAC ratios (Light-Sample/Heavy-spike-in)																								Student's t-tests
								YnMyr			YnMyr + NMTi			X10			X10 + NMTi			X8			X8 + NMTi			X3			X3 + NMTi			YnMyr vs YnMyr+NMTi			X10 vs X10+NMTi			X8 vs X8+NMTi			X3 vs X3+NMTi			YnMyr vs X3			YnMyr vs X8
Gene names	Protein names	Myristoylated	Unique peptides	Sequence coverage [%]	Q-value	Score	Intensity	Replicate 1	Replicate 2	Replicate 3	Replicate 1	Replicate 2	Replicate 3	Replicate 1	Replicate 2	Replicate 3	Replicate 1	Replicate 2	Replicate 3	Replicate 1	Replicate 2	Replicate 3	Replicate 1	Replicate 2	Replicate 3	Replicate 1	Replicate 2	Replicate 3	Replicate 1	Replicate 2	Replicate 3	Significance	-log(p-value)	Difference	Significance	-log(p-value)	Difference	Significance	-log(p-value)	Difference	Significance	-log(p-value)	Difference	Significance	-log(p-value)	Difference	Significance	-log(p-value)	Difference
CDC2;CDK1	Cyclin-dependent kinase 1		10	48.5	0	61.33	6355000000	0.426855	0.570657	0.443925	0.597031	0.846955	0.577054	0.362554	0.0827026	0.0618453	0.158854	0.259785	0.396159	0.51248	0.412185	0.471968	0.147567	0.388686	0.783163	-0.174687	0.0416635	-0.166389	-0.201842	-0.138791	-0.0563411		1.33781	0.193201		0.231696	0.102565		0.042319	-0.0257389		0.0434683	-0.0144171	+	2.57879	0.589335		0.0993771	0.0149348
HDLBP	Vigilin		12	12	0	20.888	1104800000	-0.221573	-0.0481287	-0.229061	-0.264079	-0.426024	-0.549198	-0.0321969	NaN	NaN	-0.885207	NaN	NaN	0.413702	0.162081	NaN	NaN	-0.596689	0.245374	-0.606298	-1.00347	-0.371497	-0.808968	-0.558899	-0.404363		0.854197	-0.246846		0	-0.85301		0	-0.75877		0.391493	0.204791	+	1.34052	0.561723	+	1.48191	-0.454146
TMEM120A;TMPIT	Transmembrane protein 120A		2	11.5	0	5.4686	573490000	NaN	NaN	NaN	NaN	1.32562	NaN	NaN	NaN	NaN	NaN	NaN	NaN	NaN	NaN	NaN	NaN	NaN	NaN	NaN	-0.653332	-0.534955	-0.895583	-0.557561	-0.845417		0	NaN		-4.34e-08	0		-4.34e-08	0		0.11378	0.0137804		0	NaN		-4.34e-08	0
RPS9	40S ribosomal protein S9		23	67	0	53.932	331610000000	-0.0346627	-0.181182	-0.160379	-0.185228	-0.146036	-0.234618	0.0255958	0.0690147	-0.0100762	0.0483758	-0.0418329	0.00201835	-0.123874	-0.0625954	-0.037636	-0.0729683	-0.0477858	-0.066518	0.223917	0.208767	0.246469	0.282973	0.217603	0.304044		0.441812	-0.0632196		0.211415	-0.0253244		0.188586	0.0122778		0.0503084	0.00245132	+	2.73902	-0.371478		0.410694	-0.0507061
EHD1	EH domain-containing protein 1		8	23.7	0	13.136	917020000	0.424707	NaN	NaN	0.876802	NaN	NaN	NaN	NaN	NaN	0.441696	0.97966	0.50457	NaN	NaN	NaN	NaN	NaN	2.20113	0.987103	0.668301	NaN	NaN	NaN	0.843903		0	0.452095		0	NaN		0	NaN		0	0.318802		0	-0.243593		0	NaN
PSMA2	Proteasome subunit alpha type;Proteasome subunit alpha type-2		7	41.5	0	49.927	2535900000	NaN	-0.486489	NaN	-0.471389	-0.464345	NaN	-0.433701	-0.515253	-0.00527548	NaN	NaN	NaN	-0.328181	-0.290586	-0.552093	-0.232125	-0.418504	-0.166292	0.0807941	-0.505595	-0.0298237	-0.0163807	0.140648	-0.212116		0	0.0221438		0	NaN		0.291814	0.11798		0.305566	0.187042		0	-0.302556		0	-0.0962023
MICA	MHC class I polypeptide-related sequence A		4	14.9	0	4.3359	558750000	0.391218	NaN	0.432532	0.290778	0.5065	0.464041	NaN	NaN	NaN	0.276556	NaN	0.0661237	NaN	NaN	NaN	NaN	NaN	NaN	NaN	-0.0644045	NaN	-0.755673	NaN	NaN		0.158938	-0.0344653		0	NaN		-4.34e-08	0		0	NaN	+	0.851062	0.821914		0	NaN
BAT3;BAG6	Large proline-rich protein BAG6		6	7.6	0	14.484	1450900000	NaN	NaN	NaN	NaN	NaN	NaN	NaN	0.661658	0.258459	NaN	NaN	NaN	NaN	NaN	NaN	NaN	NaN	NaN	-0.742217	-1.01363	-1.01873	-1.07251	-0.722991	-0.891482		-4.34e-08	0		0	NaN		-4.34e-08	0		1.72076	0.249393		0	NaN		-4.34e-08	0
IGHG3	Ig gamma-3 chain C region		1	30	0	4.9286	1081800000	NaN	NaN	NaN	-2.93412	-3.80448	NaN	-4.16328	NaN	NaN	NaN	NaN	NaN	-4.83354	NaN	NaN	NaN	NaN	-4.00049	NaN	NaN	NaN	NaN	NaN	NaN		0	NaN		0	NaN		0	NaN		-4.34e-08	0		-4.34e-08	0		0	NaN
EPPK1	Epiplakin		8	15.7	0	102.99	7058400000	0.232047	0.157173	0.275007	0.0600474	0.444243	0.489954	NaN	0.615793	NaN	NaN	NaN	NaN	0.339023	0.320196	0.473319	0.937118	NaN	0.405884	0.23585	0.451119	-0.0287489	0.321813	-0.0720126	0.193456		0.283203	0.110006		0	NaN		0.243001	0.26533		0.914504	-0.128963		0.0628183	-0.0266519		1.23746	-0.156104
TXNRD1	Thioredoxin reductase 1, cytoplasmic		29	64.6	0	257.24	47085000000	0.557778	0.528171	0.60739	0.639695	0.64607	0.781905	0.958434	1.12333	1.03886	0.993276	1.0497	1.07457	0.827819	0.917012	0.957543	0.696795	0.870108	0.964584	0.25181	0.171335	0.284514	0.223175	0.265917	0.217975		1.36028	0.124778		0.00876116	-0.0010256		0.534682	-0.0569623		0.218529	0.0188925	+	2.96719	0.338105	+	2.77555	-0.336345
KHSRP	Far upstream element-binding protein 2		13	26	0	37.237	5608300000	0.0227584	-0.303846	0.0443242	-0.0307813	-0.103534	-0.271984	-0.108705	0.0768327	-0.0244139	0.032242	0.153157	0.135141	0.0210533	0.126576	-0.251075	-0.247234	0.0607391	-0.117991	-0.0615712	0.0305479	-0.0807743	0.00776951	0.0167816	0.0473989		0.130067	-0.0565121		1.41986	0.125609		0.206582	-0.0670136		0.0893624	0.0150221		0.213792	-0.0647688		0.100198	-0.0444393
PYCR2	Pyrroline-5-carboxylate reductase 2;Pyrroline-5-carboxylate reductase		5	35	0	13.478	1150100000	0.681134	NaN	NaN	0.0299829	NaN	0.151729	NaN	-1.41565	-1.89122	-1.48689	NaN	-1.11644	NaN	-1.37816	-1.19909	NaN	NaN	NaN	-0.372543	0.072586	0.070252	-0.144792	0.554245	-0.286709		0	-0.651151		0	0.774773		0	NaN		0.0402174	-0.034351		0	0.681786		0	1.96976
SPCS2	Signal peptidase complex subunit 2		7	42.3	0	26.211	741520000	NaN	0.100305	NaN	NaN	0.0494913	NaN	NaN	-0.0758697	NaN	-0.197617	NaN	0.0497701	-0.184474	NaN	-0.234703	0.119555	NaN	0.0323829	-0.213169	-0.0375768	-0.0884849	-0.131708	0.038998	-0.255736		0	-0.0508136		0	NaN		1.38591	0.285557		0.220142	-0.057379		0	0.186228		0	0.309893
TKFC;DAK	Bifunctional ATP-dependent dihydroxyacetone kinase/FAD-AMP lyase (cyclizing);ATP-dependent dihydroxyacetone kinase;FAD-AMP lyase (cyclizing)		3	9.6	0	10.465	814920000	-0.505554	NaN	NaN	NaN	NaN	NaN	NaN	NaN	NaN	NaN	NaN	NaN	-0.538974	NaN	NaN	NaN	NaN	NaN	-0.219438	NaN	NaN	NaN	-0.534684	-0.302493		0	NaN		-4.34e-08	0		0	NaN		0	NaN		0	NaN		0	0.0334207
RPS24	40S ribosomal protein S24		4	35.1	0	12.957	2521400000	-0.313208	-0.552855	-0.0916943	-0.288206	0.00805652	-0.466576	0.0618453	-0.235654	NaN	-0.39388	-0.00523207	NaN	0.151339	-0.217608	-0.46341	0.0723116	-0.00306179	-0.206545	0.153286	0.0347792	0.449535	0.163241	0.289598	0.0606008		0.0864359	0.070344		0.0979858	-0.112652		0.466965	0.130794		0.201623	-0.0480231	+	1.37986	-0.535104		0.254341	-0.142693
APOOL	MICOS complex subunit MIC27		4	25.5	0	5.9392	501810000	NaN	NaN	NaN	NaN	NaN	NaN	NaN	NaN	NaN	NaN	NaN	NaN	NaN	NaN	NaN	-0.957496	NaN	NaN	NaN	-1.04958	NaN	-0.927688	NaN	NaN		-4.34e-08	0		-4.34e-08	0		0	NaN		0	NaN		0	NaN		-4.34e-08	0
IGHG1	Ig gamma-1 chain C region		3	28.6	0	28.63	31914000000	-3.77916	-4.33859	-3.27146	-2.64692	-4.8903	-3.03694	-3.06588	-3.03517	-2.40026	-3.49124	-5.25512	-5.06207	-5.88266	-3.62494	-3.00405	-3.34965	-3.49981	-3.24537	-2.57648	-3.78391	-2.24147	-4.4654	-1.86875	-3.10346		0.198804	0.271684		0.911659	-1.76904		0.344593	0.805604		1.06692	0.980698		0.154103	-0.299478		0.150431	0.374142
MPDU1;HBEBP2BPA	Mannose-P-dolichol utilization defect 1 protein		3	33.7	0	10.027	3072300000	0.444455	0.180657	0.418568	0.0258793	0.309758	0.309526	-0.0827745	-0.230533	-0.103798	-0.147538	-0.149825	-0.21419	-0.616238	-0.443772	-0.259582	-0.520666	-0.546224	NaN	-0.431832	-0.457752	-0.715273	-0.432026	-0.270661	-0.614094		0.309547	-0.132839		0.194079	-0.0314823		0.00971107	-0.00344048		0.184517	0.0961549	+	2.69488	0.88291	+	2.39201	0.787757
EIF3K	Eukaryotic translation initiation factor 3 subunit K		3	23.8	0	10.294	1037300000	NaN	NaN	NaN	NaN	NaN	NaN	NaN	NaN	-0.354096	NaN	NaN	NaN	0.121413	NaN	NaN	-0.119746	NaN	0.216362	0.174151	-0.261708	-0.130918	-0.257632	-0.132657	0.184598		-4.34e-08	0		0	NaN		0	-0.241159		0.732488	0.292116		0	NaN		0	NaN
MTHFD1L	Monofunctional C1-tetrahydrofolate synthase, mitochondrial	+	10	13.6	0	20.635	1666200000	-0.271722	-0.123025	-0.346573	NaN	0.0517201	-0.220665	-1.65672	-0.959599	-0.595838	-0.863572	-0.906304	-1.53228	NaN	NaN	NaN	NaN	NaN	NaN	-0.372823	-0.871522	NaN	0.317536	-0.111041	-0.245711		0.989213	0.150327		0.0187725	-0.0300018		-4.34e-08	0		0.0171174	-0.0322738		0.0216579	0.0298862		0	NaN
CLTC	Clathrin heavy chain;Clathrin heavy chain 1		52	50.9	0	323.31	67847000000	-0.0631378	-0.0210137	-0.0184396	-0.102574	-0.0457292	-0.0362003	0.110631	0.147437	0.172359	0.0697022	-0.0203551	0.123799	0.0213375	0.0886844	0.0855606	0.0294175	-0.0014001	0.0635029	-0.0898968	-0.0181912	-0.0489494	-0.00607205	-0.0453719	0.0164963		1.29552	-0.027304		0.764346	-0.0857604		0.450203	-0.0346874		0.186763	-0.0151866		0.194699	-0.00979281		1.71116	-0.0993912
RRBP1	Ribosome-binding protein 1		5	6.8	0	5.5376	219190000	NaN	NaN	NaN	NaN	NaN	NaN	NaN	NaN	NaN	NaN	NaN	NaN	NaN	NaN	NaN	NaN	NaN	NaN	-1.08893	-0.845313	-1.01791	NaN	NaN	-0.68214		-4.34e-08	0		-4.34e-08	0		-4.34e-08	0		0	-0.243617		0	NaN		-4.34e-08	0
TARDBP	TAR DNA-binding protein 43		4	50.2	0	13.421	2195600000	-0.358657	-0.138664	-0.219539	-0.412885	-0.358454	-0.644487	-0.605727	-0.0698153	-0.767266	NaN	-0.296864	-0.849155	-1.33384	NaN	NaN	-0.60799	NaN	NaN	0.182438	-0.287167	0.481196	0.320311	0.11929	0.33411		0.790831	-0.232989		0.553406	-0.154469		0	0.725853		0.0546712	0.0404993		0.779898	-0.4104		0	1.09489
RPL17;RPL17-C18orf32	60S ribosomal protein L17		11	58	0	40.613	35398000000	-0.0652193	-0.023827	0.0458623	-0.0755505	-0.0640726	-0.0141644	0.301822	0.362554	0.4336	0.305445	0.384713	0.296428	0.187261	0.165558	0.00590291	0.161823	0.175045	0.169925	0.276437	0.165044	0.298658	0.294077	0.294782	0.197488		0.902046	-0.0368678		0.269763	-0.03713		0.31355	0.0493572		0.0189891	0.00364299	+	2.09463	-0.266988		0.954039	-0.133969
YTHDF2	YTH domain-containing family protein 2		2	7	0	7.9182	695310000	0.0163537	0.307895	NaN	NaN	NaN	NaN	0.337083	0.185867	0.154324	-0.0442259	0.602932	NaN	NaN	-0.39352	-0.0190534	0.0497701	NaN	0.0518593	0.480679	0.182692	0.304861	-0.0997418	0.287354	0.0657101		0	NaN		0.012554	0.0178781		0	0.0709127		0.609728	0.148644		0.0589434	0.0328536		0.583833	0.368411
VTA1	Vacuolar protein sorting-associated protein VTA1 homolog		2	8.6	0	6.2852	1345000000	-0.56578	NaN	-0.496082	-0.149233	-0.101258	NaN	NaN	0.113167	NaN	0.389457	NaN	0.892896	NaN	NaN	-0.264443	NaN	NaN	NaN	NaN	-0.630349	NaN	-0.750276	NaN	NaN		0	0.416548		0	NaN		0	NaN		0	NaN		0.828729	0.159382		0	-0.266488
UBE2D3;UBE2D2	Ubiquitin-conjugating enzyme E2 D3;Ubiquitin-conjugating enzyme E2 D2		3	28.4	0	17.578	3287900000	-0.306181	-0.488734	-0.166211	-0.711417	-0.628252	-0.3138	-0.423584	-0.167183	-0.0989844	-0.144999	-0.849908	-0.102078	-0.358306	-0.119902	-0.182786	NaN	-0.292793	-0.388525	-0.172295	-0.0295291	-0.193783	-0.117568	-0.159009	-0.13125		0.927548	-0.230781		0.166759	-0.135745		1.25891	-0.189315		0.280682	-0.0405578		0.922134	-0.206749		0.354069	-0.100044
JAGN1	Protein jagunal homolog 1		2	13.3	0	9.5468	721300000	NaN	NaN	NaN	NaN	NaN	NaN	NaN	NaN	NaN	NaN	NaN	NaN	NaN	NaN	NaN	NaN	NaN	NaN	-1.59571	-1.14465	-1.31258	-1.44638	-1.1136	NaN		-4.34e-08	0		-4.34e-08	0		-4.34e-08	0		0.116626	-0.126038		0	NaN		-4.34e-08	0
DHX29	ATP-dependent RNA helicase DHX29		16	16	0	39.027	7505100000	2.05395	NaN	NaN	NaN	NaN	0.641176	NaN	NaN	NaN	NaN	NaN	NaN	NaN	NaN	NaN	NaN	NaN	NaN	-1.47421	-1.49305	-1.77739	-1.29818	-1.56132	-1.50578		0	NaN		-4.34e-08	0		-4.34e-08	0		0.0234265	0.0091025		0	3.57682		0	NaN
TPD52L2	Tumor protein D54		9	48.2	0	41.365	6102400000	0.452701	0.371615	0.100709	0.146786	0.0813396	0.377624	0.260989	0.0123541	-0.00818885	0.19862	0.0050406	0.0863761	-0.122963	-0.00879832	0.066537	0.0540844	0.123136	0.0344974	-0.0875494	-0.146947	-0.0725586	0.00302647	-0.123261	-0.292617		0.197483	-0.106425		0.0587633	0.00829409		0.547673	0.0923141		0.338933	-0.0956494	+	1.52865	0.380501		1.29126	0.330083
PTGES3	Prostaglandin E synthase 3		6	36	0	45.373	6653800000	-0.075368	-0.150001	-0.0417587	-0.0201064	-0.169501	-0.187395	-0.253378	0.0954519	0.0418037	0.190299	0.309409	-0.0843338	0.0688771	0.0514416	0.110764	0.0982848	0.0858326	0.0594937	0.135666	0.315218	0.235604	0.242206	0.168514	0.33674		0.224823	-0.0366251		0.401758	0.177165		0.0485527	0.00417604		0.229817	-0.0507029	+	3.00527	-0.353385		1.98178	-0.16607
MARCKS	Myristoylated alanine-rich C-kinase substrate	+	18	71.8	0	323.31	245800000000	-0.361769	-0.354317	-0.373365	0.0588013	-0.0538831	-0.0738791	0.436482	0.416515	0.586885	0.522458	0.484911	0.46999	1.18034	1.04649	1.09977	1.04222	1.06419	1.03647	-0.149489	-0.358491	-0.392364	-0.400454	-0.165305	-0.182688		1.86381	0.340163		0.0629243	0.0124924		0.513478	-0.0612369		3.24282	0.217943		0.668149	0.0206196	+	5.51807	-1.47202
HNRNPAB	Heterogeneous nuclear ribonucleoprotein A/B		4	19.3	0	13.384	1112600000	0.391218	-0.260152	-0.0262491	-0.120169	-0.428605	NaN	-0.263854	NaN	0.437121	0.188401	-0.286146	-0.296598	NaN	NaN	NaN	-0.792907	NaN	NaN	0.221196	0.116764	0.00259443	NaN	-0.0841197	0.347779		0.526628	-0.33992		0.0697352	-0.140732		0	NaN		0.0263381	0.00885917		0.0327825	-0.0247403		0	NaN
IGKV3-11;IGKC	Ig kappa chain C region		6	73.1	0	26.155	13042000000	-3.43682	-5.26368	-3.72799	-4.86258	-4.84162	-3.30872	-5.14785	-4.25415	-3.4527	-3.9045	-3.87724	-3.81571	-3.84257	-3.56276	-3.66363	-3.86697	-4.04169	-4.04399	-4.19596	-4.34361	-2.67227	NaN	-2.88673	-3.19932		0.107019	-0.194808		0.335444	0.419084		0.77871	-0.294563		0.0536164	-0.0334021		0.254948	-0.634891		0.325184	-0.453179
SBDS	Ribosome maturation protein SBDS		7	34	0	19.328	1418900000	-0.046325	-0.275245	-0.493479	-0.36303	-0.477623	-0.190388	0.0508847	-0.295836	0.120883	0.0871912	-0.121691	-0.0890985	0.00432164	-0.00750711	-0.0222145	-0.185622	NaN	-0.148625	-0.30365	-0.32274	0.105544	0.0892269	-0.0186441	-0.222818		0.129757	-0.0719971		0.000429391	0.000157017		0.899031	-0.158177		0.546598	-0.139048		0.529258	-0.229027		0.9526	-0.263216
HYOU1	Hypoxia up-regulated protein 1		7	12.1	0	11.03	2187200000	NaN	NaN	0.678793	-0.196575	NaN	2.55778	NaN	-0.578478	1.66312	NaN	0.555129	-0.0952192	-0.684967	-0.801003	NaN	NaN	0.225645	-0.0413726	NaN	NaN	0.55218	0.478402	0.208392	NaN		0	1.87898		0.0632068	-0.312365		0	1.02665		0	-0.343788		0	0.163502		0	1.42178
COPE	Coatomer subunit epsilon		4	23.5	0	7.6269	673870000	NaN	NaN	NaN	-0.208578	NaN	NaN	NaN	NaN	NaN	NaN	NaN	NaN	NaN	NaN	NaN	NaN	NaN	NaN	-0.91357	NaN	-0.203186	NaN	-0.814895	NaN		0	NaN		-4.34e-08	0		-4.34e-08	0		0	-0.611708		0	NaN		-4.34e-08	0
CAB39	Calcium-binding protein 39		4	17.1	0	6.3757	4564500000	0.844305	NaN	-0.620623	NaN	NaN	NaN	NaN	NaN	-1.11098	NaN	NaN	NaN	NaN	0.0783365	NaN	NaN	NaN	-1.67066	NaN	NaN	0.0524158	0.427606	NaN	NaN		0	NaN		0	NaN		0	NaN		0	NaN		0.05503	-0.12817		0	0.0335047
QSOX2	Sulfhydryl oxidase;Sulfhydryl oxidase 2		5	10.1	0	5.5538	368670000	NaN	NaN	NaN	NaN	NaN	NaN	NaN	NaN	NaN	NaN	NaN	NaN	NaN	NaN	NaN	NaN	NaN	NaN	NaN	-1.98034	NaN	-3.17514	NaN	NaN		-4.34e-08	0		-4.34e-08	0		-4.34e-08	0		0	NaN		0	NaN		-4.34e-08	0
LYPLA1	Acyl-protein thioesterase 1	+	4	38.6	0	11.313	729090000	-0.411234	NaN	-0.770338	0.0425042	NaN	-0.00128459	NaN	-0.852407	NaN	-0.573488	-0.189187	NaN	NaN	NaN	-0.372954	NaN	-0.275053	-0.154056	NaN	0.200128	NaN	0.290189	0.612305	0.275245		0.794086	0.611396		0	0.66322		0	0.218897		0	-0.0149431	+	1.34007	-0.835944		0	-0.217832
YBX1	Nuclease-sensitive element-binding protein 1		4	27.8	0	24.001	1180900000	NaN	0.0517201	-0.0621133	-0.124424	0.0714881	-0.180381	NaN	0.317651	0.0870554	-0.0240177	-0.0402447	-0.280177	-0.053314	-0.346812	-0.299827	0.146134	-0.0479946	0.0360461	-0.474352	-0.135554	-0.604323	-0.728813	-0.60246	-0.185622		0.217933	-0.0492498		2.08638	-0.362564		1.68214	0.278046		0.0893814	0.0687523	+	0.8743	0.484367		0.781666	0.228121
PSME2	Proteasome activator complex subunit 2		1	52.4	0	79.243	11159000000	0.521352	0.381283	0.287591	0.638584	0.538439	0.51076	0.204767	0.286645	0.267955	0.0274371	0.257011	0.154454	0.0786098	-0.0879327	0.20201	0.353436	0.188907	0.0147838	-0.14116	-0.0348991	0.024887	-0.0257644	0.0380147	0.0458623		1.48174	0.165852		0.886727	-0.106822		0.289272	0.12148		0.0440182	-0.0071687	+	2.35794	0.408668	+	1.43173	0.332513
SPAG9	C-Jun-amino-terminal kinase-interacting protein 4		4	6.4	0	4.7204	625440000	NaN	NaN	NaN	NaN	0.143394	NaN	NaN	NaN	NaN	NaN	NaN	NaN	NaN	NaN	NaN	NaN	NaN	NaN	-0.0473235	-1.25805	-1.03511	NaN	NaN	NaN		0	NaN		-4.34e-08	0		-4.34e-08	0		0	1.21072		0	NaN		-4.34e-08	0
PSMC6	26S protease regulatory subunit 10B		14	39.7	0	67.27	4625800000	-0.70099	-0.512452	-0.518102	-0.0953887	-0.429965	0.0384361	-0.353856	-0.163737	-0.346133	0.181802	0.731009	0.290896	0.330673	NaN	-0.094911	0.901108	NaN	NaN	-0.18182	0.00245056	0.219215	0.0809305	0.315566	-0.0389249		0.883763	0.414875	+	1.63412	0.689144		0	0.570435		0.300864	-0.0692583	+	2.80506	-0.678047	+	1.52787	-0.695062
RER1	Protein RER1		7	41.8	0	33.511	2714700000	1.09024	0.848317	1.17351	1.15134	0.866473	1.14665	0.922045	0.686075	0.195348	0.263756	0.340961	0.476641	0.0113525	-0.105799	0.0540844	-0.0212626	-0.0401111	0.10675	-0.552897	-0.623198	-0.505738	-0.492687	-0.375141	-0.508876		0.24978	0.0174649		0.322943	-0.240703		0.345098	0.0285796		0.544811	0.0615701	+	3.92604	1.5779	+	3.1948	1.05081
CDKN2A	Tumor suppressor ARF		4	46.5	0	17.37	4465900000	-0.0740006	-0.154602	-0.0532243	0.0881415	-0.0416399	-0.0536434	0.0453032	0.709644	0.126048	0.44869	1.01828	0.214125	0.47747	0.537545	0.353549	0.791522	0.363676	0.682304	0.20063	0.270947	0.0701145	0.0988237	0.0569996	0.191815		0.704495	0.0915618		0.98341	0.266699		0.35282	0.156313		0.0209261	0.00318636	+	1.58047	-0.240571	+	3.04007	-0.55013
SNX6	Sorting nexin-6;Sorting nexin-6, N-terminally processed		4	12	0	11.04	1063500000	NaN	0.80033	0.908582	NaN	NaN	0.561008	0.399554	NaN	0.800496	0.580724	NaN	NaN	0.436482	0.228111	0.307662	0.412402	0.50518	0.47415	-0.0407046	0.135535	0.213254	-0.0259847	0.127897	0.090447		0	-0.347574		0	0.18117		0.597169	0.139826		0.1992	-0.0483881	+	2.30973	0.746855	+	2.0362	0.530372
PRPF38B	Pre-mRNA-splicing factor 38B		4	6.2	0	4.357	477450000	-0.295677	-0.560579	NaN	NaN	NaN	-0.408416	NaN	NaN	NaN	NaN	NaN	NaN	NaN	NaN	NaN	NaN	NaN	NaN	NaN	NaN	NaN	NaN	NaN	NaN		0	NaN		-4.34e-08	0		-4.34e-08	0		-4.34e-08	0		0	NaN		0	NaN
PVR	Poliovirus receptor		6	16.3	0	17.316	5197700000	0.728835	1.04502	0.926683	1.15075	1.22373	0.839557	-0.113458	0.000432815	0.0817487	0.0370308	-0.120718	-0.00508726	NaN	NaN	0.64321	1.62087	0.566377	1.03097	1.4936	2.08049	NaN	0.507617	0.994797	1.16678		0.438463	0.171167		0.0740311	-0.019166		0	0.387762		0.016321	0.0361359		0.25395	-0.393872		0	0.256971
HADH	Hydroxyacyl-coenzyme A dehydrogenase, mitochondrial		7	35.8	0	45.659	6093300000	-0.365946	0.0328061	0.282025	-0.19479	NaN	-0.0702998	-1.09857	-0.351295	-0.515336	-0.798692	NaN	NaN	-0.528573	-0.280597	-1.1212	NaN	-0.182131	-0.880099	0.312317	-0.0382433	0.317188	0.171335	0.10165	-0.0486211		0.103535	-0.0905843		0	0.299875		0.596592	0.169785		0.0482209	-0.0283114		0.318332	-0.167132	+	0.936656	0.62642
AKR1C3	Aldo-keto reductase family 1 member C3		9	68.7	0	78.398	16968000000	0.940655	0.832607	0.960363	0.790355	0.80892	0.953675	0.961846	0.966209	0.891186	0.922883	0.813771	1.18193	1.1109	0.883934	0.813032	0.840282	1.0606	0.973134	0.239154	0.224781	0.162081	0.282499	0.236952	0.241474		0.50156	-0.0602249		0.0827554	0.0331143		0.0486131	0.022051		0.168486	0.0160727	+	3.69931	0.688088		0.089643	-0.024746
PITPNB	Phosphatidylinositol transfer protein beta isoform		4	17.3	0	8.7544	602110000	NaN	-1.20613	NaN	0.49334	NaN	NaN	NaN	NaN	NaN	NaN	NaN	NaN	NaN	NaN	0.159629	0.834145	-1.12372	0.545375	NaN	0.396817	NaN	0.34005	0.00748262	NaN		0	NaN		-4.34e-08	0		0	0.385746		0	NaN		0	-1.57456		0	-1.36576
IVD	Isovaleryl-CoA dehydrogenase, mitochondrial		4	10.1	0	6.8025	230470000	NaN	NaN	NaN	NaN	NaN	NaN	NaN	-1.65626	-2.00335	NaN	-1.59527	-2.51887	NaN	NaN	-1.55601	NaN	-1.72428	NaN	NaN	NaN	NaN	NaN	NaN	NaN		-4.34e-08	0		0.240354	-0.227262		0	NaN		-4.34e-08	0		-4.34e-08	0		0	NaN
ILK	Integrin-linked protein kinase		4	10.1	0	5.6075	493900000	NaN	NaN	NaN	NaN	NaN	NaN	NaN	NaN	NaN	NaN	NaN	NaN	NaN	NaN	NaN	NaN	NaN	NaN	-0.158043	NaN	0.081067	-0.021819	NaN	NaN		-4.34e-08	0		-4.34e-08	0		-4.34e-08	0		0	NaN		0	NaN		-4.34e-08	0
NCEH1	Neutral cholesterol ester hydrolase 1		12	40	0	70.002	6663900000	1.17287	NaN	1.48228	2.8972	1.03801	1.29813	-0.0464442	-0.158735	-0.380671	-0.0641933	0.336398	-0.196657	-0.428741	-0.840836	-0.752145	-0.721754	-0.404687	-0.529926	-1.42678	-2.02679	-1.81218	-1.92802	-1.58329	-1.96945		0.245857	0.77009		0.556746	0.220466		0.200484	0.121785		0.532383	0.26249	+	3.75313	3.24991	+	2.68197	2.00148
GPI	Glucose-6-phosphate isomerase		18	54.5	0	263.27	65458000000	-0.171385	-0.183835	-0.197352	-0.269373	-0.205464	-0.154072	-0.28186	-0.247714	-0.217021	-0.189763	-0.209445	-0.14634	-0.274442	-0.225633	-0.289598	-0.237881	-0.257528	-0.16537	-0.215764	-0.286269	-0.225784	-0.173222	-0.223407	-0.284827		0.224245	-0.025446		1.29737	0.067016		0.354565	0.0429646		0.0805721	-0.0129079		0.589565	0.0442347		1.72536	0.0790338
NAA15	N-alpha-acetyltransferase 15, NatA auxiliary subunit		18	21.6	0	43.379	2282200000	0.28404	0.270708	0.280719	0.482435	0.701859	0.230326	0.680504	0.470927	0.43957	0.492622	NaN	NaN	0.628354	0.471239	0.60985	-0.223407	NaN	0.486354	-0.463251	-0.446915	-0.17345	-0.153029	-0.259219	-0.165434		0.523735	0.193051		0	-0.187882		0.388982	-0.487628		0.601499	-0.0381702	+	2.31722	0.536287	+	2.37263	-0.291325
C11orf98			6	44.7	0	20.868	4983700000	-0.384885	-0.0911717	-0.317966	-0.533702	-0.229958	-0.509902	-0.163947	0.0112093	-0.197699	-0.122853	-0.148289	-0.154361	0.189414	-0.0336286	-0.256545	-0.0334219	-0.196756	0.037593	0.186374	0.12618	0.0911243	0.0177795	-0.0870129	0.308361		1.98952	-0.159846		0.127535	-0.0250221		0.0611799	-0.0306083		0.147506	0.057546	+	1.65532	-0.343036		0.670236	-0.231088
TPT1	Translationally-controlled tumor protein		6	48.4	0	23.396	5147000000	-0.45793	0.135666	-0.0816138	0.0124972	-0.105194	-0.13155	-0.16929	-0.0580975	-0.0413726	-0.201244	-0.0160014	-0.263525	0.370611	0.12075	0.147046	-0.0776499	0.228111	-0.178665	0.00187425	-0.0280574	-0.28065	-0.00869675	-0.0210868	-0.110122		0.0944	0.0598769		0.333512	-0.0706701		0.497439	-0.222204		0.212829	0.06269		0.0509879	-0.0288245		0.846194	-0.347428
CYP51A1	Lanosterol 14-alpha demethylase		1	28.9	0	38.207	3159700000	1.42169	2.0082	1.27524	1.13993	1.65219	1.2806	0.00144204	-0.0263373	0.0511633	-0.582469	-0.393236	-0.414326	-1.21026	-1.01441	-1.29768	-1.1624	-1.43444	-1.44855	-0.52558	-0.186672	-0.466337	-0.65474	-0.228655	-0.503589		0.708087	-0.210808	+	1.76439	-0.472099		0.485121	-0.174344		0.0293786	0.0166418	+	2.80451	2.0043	+	3.48192	2.7425
TM9SF4	Transmembrane 9 superfamily member 4		5	11	0	11.01	1906500000	NaN	NaN	NaN	NaN	0.0342158	-0.0668504	-0.139315	-0.0541377	-0.0762347	-0.209995	NaN	-0.192431	-0.698085	-0.411733	-0.421882	-0.476739	-0.10642	NaN	0.157691	0.00345838	NaN	-0.451682	0.0728604	-0.113473		0	NaN		0.817885	-0.0934381		0.99718	0.263329		0.642791	0.24622		0	NaN		0	NaN
SET;SETSIP	Protein SET;Protein SETSIP		2	7.9	0	7.2031	345760000	NaN	NaN	NaN	-0.102094	0.337311	NaN	NaN	NaN	NaN	NaN	NaN	NaN	NaN	NaN	NaN	NaN	NaN	NaN	NaN	NaN	NaN	NaN	NaN	-0.576239		0	NaN		-4.34e-08	0		-4.34e-08	0		0	NaN		-4.34e-08	0		-4.34e-08	0
RPSA	40S ribosomal protein SA		10	47.7	0	108.76	17807000000	0.0144981	-0.0483078	-0.178535	-0.277989	-0.19187	-0.231176	0.0719	0.0687396	0.0560286	-0.165273	0.06226	0.0690147	-0.11904	-0.152853	-0.157641	-0.0968691	-0.363716	-0.123513	-0.0593746	-0.209895	-0.0674248	-0.105985	0.0487942	-0.0138439		0.838243	-0.162897		0.357005	-0.0768887		0.23324	-0.0515214		1.71074	0.119627		0.33051	0.0569871		0.551385	0.0723965
ARL6IP4	ADP-ribosylation factor-like protein 6-interacting protein 4		4	28.4	0	20.034	842770000	-0.508219	NaN	-0.300697	-0.181738	NaN	-0.280633	NaN	NaN	NaN	NaN	0.0954519	-0.0105412	NaN	-0.506045	NaN	NaN	NaN	-0.22095	0.803558	NaN	0.24245	0.538936	NaN	0.627887		0.33637	0.173272		0	NaN		0	NaN		0	0.0889515	+	1.31802	-0.795151		0	0.101587
DDX46		+	1	41.6	0	133.48	11369000000	-0.746543	-0.932884	-1.3325	-0.675604	-0.603424	-0.761384	0.183328	0.501414	0.405666	0.28238	0.47415	0.61664	0.244278	0.116764	0.252416	0.294077	0.392427	0.369383	0.575312	0.533862	0.440102	0.534759	0.587461	0.77762		0.812018	0.323838		0.516707	0.0942547		0.799852	0.147476		0.87989	0.14389	+	2.99369	-1.50688	+	2.60636	-1.20846
ECI2	Enoyl-CoA delta isomerase 2, mitochondrial		17	51.4	0	283.09	20357000000	2.27387	2.30153	2.13813	1.89076	2.3501	2.24632	1.31272	1.1858	1.1445	0.958212	1.231	1.3058	1.72347	1.63831	1.79306	2.05603	1.66762	1.8242	-1.60358	-1.673	-1.77497	-1.66671	-1.60867	-1.61065		0.171248	-0.0754511		0.10677	-0.0493401		0.490424	0.131002		0.969076	0.0972617	+	6.45064	3.94274	+	2.81528	0.519563
CAST	Calpastatin		5	8.4	0	19.254	420730000	NaN	NaN	NaN	NaN	NaN	NaN	NaN	NaN	NaN	NaN	NaN	NaN	NaN	NaN	NaN	NaN	NaN	NaN	-1.20976	NaN	NaN	-1.14618	NaN	-0.690218		-4.34e-08	0		-4.34e-08	0		-4.34e-08	0		0	0.455962		0	NaN		-4.34e-08	0
PACSIN3	Protein kinase C and casein kinase substrate in neurons protein 3		2	6.2	0	4.1202	255650000	-0.0365998	NaN	0.148479	NaN	0.173	NaN	NaN	NaN	NaN	NaN	NaN	NaN	NaN	NaN	NaN	-0.487257	NaN	NaN	0.210389	0.294077	NaN	NaN	NaN	0.855352		0	NaN		-4.34e-08	0		0	NaN		0	-0.0836878		0	-0.238137		0	NaN
CD276	CD276 antigen		7	29.4	0	52.775	5864300000	0.439995	0.460481	0.582363	0.451013	0.638027	0.686164	-0.510005	-0.567147	-0.363475	-0.750688	-0.70875	-0.599156	0.202136	-0.0169352	0.238787	0.0496307	-0.101443	0.0641931	1.33651	1.42073	1.41792	1.46263	1.3076	1.50828		0.74369	0.0974552		1.62688	-0.205989		1.4331	-0.137202		0.385461	-0.0496271	+	4.44215	-0.939478	+	1.74225	0.352951
CAPNS1	Calpain small subunit 1		11	41.6	0	100.31	15424000000	-0.0586082	-0.143118	-0.0921556	-0.0118788	-0.0271898	-0.0333628	0.070252	0.137897	0.018919	0.0271541	0.196481	0.113567	0.0335111	0.0743684	-0.0540327	0.0281448	0.0309717	0.160404	0.130799	0.306729	0.154454	0.0745054	0.235237	0.175684		1.12853	0.0738167		0.330411	0.0367115		0.249543	0.0552246		0.00698031	0.0020108	+	1.72596	-0.276523		1.20662	-0.115909
DDOST	Dolichyl-diphosphooligosaccharide--protein glycosyltransferase 48 kDa subunit		5	12.1	0	13.196	1471400000	-0.125132	-0.0723159	0.266757	-0.124314	-0.0174171	0.182057	-0.470749	-0.511526	-0.138902	-0.909119	NaN	NaN	-0.597212	-0.278811	-0.111134	-0.389035	-0.519032	-0.484166	-0.0938328	0.233643	0.124725	0.431356	0.103934	0.298306		0.0787185	-0.00966106		0	-0.438371		0.281657	-0.135025		0.667179	-0.160439		0.722446	-0.240138		0.871127	0.352155
DDX3X;DDX3Y	ATP-dependent RNA helicase DDX3X;ATP-dependent RNA helicase DDX3Y		3	20.5	0	69.134	6442400000	0.0220482	0.156397	0.00575919	0.073546	0.129349	-0.151106	0.144177	0.639325	0.742955	0.56589	0.308244	0.410667	0.738033	0.502127	0.811224	0.645517	0.759071	0.483674	-0.0501289	0.164014	0.0574155	0.132906	-0.266229	-0.0668353		0.265164	-0.0441383		0.108568	-0.0805519		0.108372	-0.0543741		1.61259	-0.245843		0.422379	-0.0567104	+	2.39515	-0.622393
SPTAN1	Spectrin alpha chain, non-erythrocytic 1		7	3.7	0	11.926	395620000	NaN	NaN	NaN	0.0153548	NaN	NaN	NaN	NaN	NaN	NaN	NaN	NaN	NaN	NaN	NaN	NaN	NaN	NaN	NaN	-0.258132	-0.042026	0.0487942	-0.750907	-0.343476		0	NaN		-4.34e-08	0		-4.34e-08	0		0.749001	-0.550575		0	NaN		-4.34e-08	0
HSPA1B;HSPA1A	Heat shock 70 kDa protein 1B;Heat shock 70 kDa protein 1A		14	55.3	0	248.01	75368000000	0.0899048	-0.0160014	0.0430645	-0.00102469	-0.0504576	0.00662125	-0.186049	-0.109343	-0.141621	-0.204665	-0.194559	-0.204699	-0.0699212	-0.0170229	-0.101629	-0.168155	-0.216619	-0.0803929	0.12499	0.111699	0.191057	0.113434	0.146655	0.0924781		0.998859	-0.053943		0.979765	-0.0556367		0.544538	-0.0921979		0.388261	-0.0173557		1.16397	-0.0997407		1.21635	0.101847
SCRIB	Protein scribble homolog		4	4.6	0	5.6014	1108000000	NaN	NaN	NaN	NaN	NaN	NaN	NaN	NaN	NaN	NaN	NaN	NaN	NaN	NaN	NaN	NaN	NaN	NaN	0.404467	0.0560286	-0.0654156	NaN	NaN	NaN		-4.34e-08	0		-4.34e-08	0		-4.34e-08	0		0	0.348439		0	NaN		-4.34e-08	0
IGHG2	Ig gamma-2 chain C region		2	25.8	0	4.1275	2471500000	NaN	-5.53986	-7.03671	-6.18254	-6.39897	-7.28916	-5.72029	-5.85676	-5.90608	-6.67592	-5.54753	-7.42254	NaN	-6.42551	-6.50753	-6.64658	-6.32101	-7.49947	NaN	NaN	-5.12195	NaN	-6.12552	-5.79434		0.497496	-0.555779		0.503787	-0.720951		0.246552	-0.443716		0	-1.00357		0	-1.16633		0.0787384	0.178237
PUF60	Poly(U)-binding-splicing factor PUF60		15	41.6	0	174.55	10532000000	0.850959	0.701593	0.88323	1.04488	0.634779	0.940655	1.15614	0.983021	0.858936	1.01628	0.613626	0.820975	0.867896	0.75369	0.842456	0.932515	0.76086	1.1769	-1.04883	-1.14781	-1.01812	-1.15149	-1.02688	-1.10762		0.301203	0.0615119		0.69078	-0.182404		0.506391	0.13541		0.5417	0.0446966	+	4.94977	1.91773		0.049114	-0.00942002
MATR3	Matrin-3		10	19	0	95.472	2601200000	-0.126959	-0.232752	-0.402798	0.191689	-0.324997	-0.182197	0.327457	-0.0647666	NaN	NaN	NaN	NaN	0.0479571	NaN	NaN	NaN	NaN	NaN	-0.0248688	0.0807941	0.196859	0.141302	0.14104	-0.437682		0.453223	0.149001		0	NaN		0	NaN		0.55773	-0.246822	+	1.97358	-0.393821		0	-0.302127
PROCR	Endothelial protein C receptor		3	18.3	0	7.7247	1811300000	1.092	0.794936	1.54404	1.31956	NaN	1.27673	0.844466	0.731618	NaN	NaN	NaN	NaN	0.53037	NaN	0.345396	0.0597706	0.685895	NaN	NaN	1.48805	NaN	1.49139	NaN	NaN		0.0227461	-0.0198749		0	NaN		0	-0.4706		0	NaN		0.514155	-0.346062	+	1.03309	0.705777
ATRIP	ATR-interacting protein		2	9.7	0.00055772	3.0929	4935200000	NaN	NaN	NaN	NaN	NaN	NaN	NaN	-3.16256	NaN	-2.67844	-4.19572	NaN	NaN	NaN	NaN	NaN	NaN	NaN	NaN	NaN	NaN	-2.64593	NaN	NaN		-4.34e-08	0		0	-1.03316		-4.34e-08	0		0	NaN		0	NaN		-4.34e-08	0
HIST1H2AJ;HIST1H2AH;H2AFJ;HIST2H2AC;HIST1H2AC;HIST3H2A;HIST2H2AA3;HIST1H2AD;HIST1H2AG;HIST1H2AB;H2AFV;H2AFZ;HIST1H2AA;H2AFX	Histone H2A type 1-J;Histone H2A type 1-H;Histone H2A.J;Histone H2A type 2-C;Histone H2A type 1-C;Histone H2A type 3;Histone H2A type 2-A;Histone H2A type 1-D;Histone H2A type 1;Histone H2A type 1-B/E;Histone H2A;Histone H2A.V;Histone H2A.Z;Histone H2A type 1-A;Histone H2AX		3	20.7	0	6.4667	1060800000	-1.0858	-1.08773	-1.01759	-0.82026	NaN	-0.72104	-1.46638	-3.0328	-1.18436	-1.12661	-1.13628	NaN	-1.51974	-1.5569	-1.48718	-1.29173	NaN	NaN	-0.560962	-0.372113	NaN	-0.586558	-1.98582	-0.501974		1.45488	0.281048		0.412126	1.11814		0	0.228002		0.114594	-0.0521326	+	2.19631	-0.584374	+	3.93234	0.457562
			2	47.9	0	28.555	280870000	-2.29569	-2.21123	-1.63603	NaN	NaN	NaN	NaN	NaN	NaN	NaN	NaN	NaN	NaN	NaN	NaN	NaN	NaN	NaN	NaN	NaN	NaN	NaN	NaN	NaN		0	NaN		-4.34e-08	0		-4.34e-08	0		-4.34e-08	0		0	NaN		0	NaN
PTBP1	Polypyrimidine tract-binding protein 1		10	31.3	0	66.883	5650500000	0.118094	0.0877344	-0.130334	-0.0881934	-0.0264401	0.00949053	0.143655	0.0350608	0.223793	0.0434844	0.158596	-0.102543	-0.137521	0.0717627	0.144829	0.0824301	-0.016512	0.144177	0.10675	0.059909	0.0147838	0.216238	-0.0537033	0.129745		0.20793	-0.0602125		0.285533	-0.10099		0.166966	0.0436745		0.319578	-0.0360462		0.293004	-0.071812		0.0033831	-0.00119233
NELFB	Negative elongation factor B		6	10	0	7.509	396030000	NaN	NaN	NaN	0.66712	NaN	NaN	NaN	0.210389	NaN	NaN	NaN	NaN	NaN	NaN	NaN	NaN	NaN	NaN	NaN	0.323428	0.239642	NaN	0.00532815	0.038998		0	NaN		0	NaN		-4.34e-08	0		0	-0.234314		0	NaN		-4.34e-08	0
TAP1	Antigen peptide transporter 1		5	8.3	0	25.876	695960000	1.34914	NaN	2.20057	NaN	NaN	NaN	NaN	NaN	NaN	NaN	NaN	NaN	NaN	NaN	NaN	NaN	NaN	NaN	-0.690917	-0.737495	-0.714728	-0.683043	-0.798743	-0.355295		0	NaN		-4.34e-08	0		-4.34e-08	0		0.293076	0.0967707	+	2.36121	2.48661		0	NaN
QIL1;C19orf70	Protein QIL1		4	46.4	0	12.03	526030000	NaN	NaN	NaN	NaN	NaN	NaN	NaN	NaN	NaN	NaN	NaN	NaN	NaN	NaN	NaN	NaN	NaN	NaN	-1.06359	-0.772308	NaN	-1.0579	-1.14105	-0.739252		-4.34e-08	0		-4.34e-08	0		-4.34e-08	0		0.0125782	0.0136843		0	NaN		-4.34e-08	0
ESYT2	Extended synaptotagmin-2		7	12.1	0	8.7462	842720000	NaN	NaN	NaN	NaN	NaN	NaN	NaN	NaN	NaN	NaN	NaN	NaN	NaN	-0.284651	NaN	NaN	NaN	NaN	0.329755	-1.36878	NaN	-0.982705	0.086512	0.0581087		-4.34e-08	0		-4.34e-08	0		0	NaN		0.823872	1.36967		0	NaN		0	NaN
ILVBL	Acetolactate synthase-like protein		23	54.9	0	294.04	45131000000	2.98339	2.46268	2.59197	2.84657	2.69158	3.13381	2.39306	2.79158	2.85058	3.02841	2.82408	2.39185	2.58017	2.47049	2.72779	2.316	2.24102	2.6396	-1.61529	-1.49517	-1.57592	-1.59414	-1.59492	-1.61039		0.404559	0.21131		0.0725939	0.069704		1.16043	-0.193942		0.570466	-0.0517926	+	4.92249	4.23442		0.191165	0.0865295
ACO2	Aconitate hydratase, mitochondrial		8	14.3	0	10.243	970530000	NaN	NaN	NaN	-0.995276	-0.906061	-0.0682111	NaN	-0.555418	NaN	-0.465919	-0.878268	-0.72824	NaN	0.0278618	-0.0654004	-0.146084	NaN	-0.697336	-0.0630926	-0.0253679	0.100036	0.132906	0.617863	0.072586		0	NaN		0	-0.322851		0	-0.631935		0.270576	0.139927		0	NaN		0	NaN
PRNP	Major prion protein		6	24.5	0	30.282	4064200000	1.67003	1.52025	1.70713	2.22786	2.27375	2.28377	1.29883	1.0292	0.660655	1.41965	1.81893	1.64805	2.54045	2.66132	2.6972	3.03724	NaN	3.06003	0.762136	-0.359416	-0.476438	-0.544771	0.742869	0.537743	+	2.01476	0.629332		0.862423	0.632645		1.00694	0.429814	+	2.89667	1.14112	+	4.92509	2.09267	+	3.75605	-1.00052
CNOT1	CCR4-NOT transcription complex subunit 1		4	2.1	0	4.295	3851900000	NaN	NaN	NaN	NaN	NaN	NaN	NaN	NaN	NaN	NaN	NaN	NaN	NaN	NaN	NaN	NaN	NaN	NaN	-0.206745	NaN	NaN	NaN	-0.397372	NaN		-4.34e-08	0		-4.34e-08	0		-4.34e-08	0		0	NaN		-4.34e-08	0		-4.34e-08	0
HCFC1	Host cell factor 1;HCF N-terminal chain 1;HCF N-terminal chain 2;HCF N-terminal chain 3;HCF N-terminal chain 4;HCF N-terminal chain 5;HCF N-terminal chain 6;HCF C-terminal chain 1;HCF C-terminal chain 2;HCF C-terminal chain 3;HCF C-terminal chain 4;HCF C-terminal chain 5;HCF C-terminal chain 6		2	2.5	0.0035461	1.9605	153150000	NaN	NaN	NaN	NaN	-0.706889	-0.654558	NaN	NaN	NaN	NaN	NaN	NaN	NaN	NaN	NaN	NaN	NaN	NaN	NaN	NaN	NaN	NaN	-0.482573	NaN		0	NaN		-4.34e-08	0		-4.34e-08	0		0	NaN		-4.34e-08	0		-4.34e-08	0
NUDT5	ADP-sugar pyrophosphatase		9	36.6	0	37.088	3044700000	-0.257045	-0.48661	-0.306163	0.110764	0.227248	-0.337886	-0.334862	-0.215714	-0.157367	-0.0306782	0.0192037	-0.0772997	NaN	-0.0838291	0.169412	-0.0807896	-0.0125627	-0.15441	0.0654344	0.0170666	0.0585242	-0.0768128	-0.210262	0.104068		0.609547	0.349982		1.0485	0.20639		0.195242	-0.126278		0.0313704	-0.0131793	+	1.91323	-0.349532	+	1.24248	-0.392731
USP14	Ubiquitin carboxyl-terminal hydrolase;Ubiquitin carboxyl-terminal hydrolase 14		7	20.1	0	22.484	1521400000	-0.192414	-0.147777	-0.0587284	-0.0806523	-0.121063	-0.204915	NaN	-0.0392066	-0.101397	NaN	0.0213375	0.14991	-0.0245018	-0.146148	-0.266941	0.208018	NaN	0.113167	0.136585	-0.0484122	0.000432815	0.00906043	-0.0464591	0.0630887		0.0105228	-0.0025699		0.456559	0.155925		0.822463	0.306314		0.355819	0.0640446		1.30227	-0.12		0.0554217	0.0128902
RNPEP	Aminopeptidase B		3	6.4	0	5.8767	575400000	NaN	NaN	NaN	NaN	-0.69094	-0.836372	NaN	NaN	NaN	NaN	NaN	-0.132451	NaN	NaN	NaN	NaN	NaN	NaN	-0.0441368	0.0100636	-0.149265	NaN	-0.113957	-0.163526		0	NaN		0	NaN		-4.34e-08	0		0.0616963	-0.0094465		0	NaN		-4.34e-08	0
CD9	Tetraspanin;CD9 antigen		6	37.7	0	62.86	42637000000	0.644041	0.622837	0.650305	0.777704	0.693677	0.847837	-0.787518	-0.790409	-0.705406	-0.782819	-0.426994	-0.422114	0.208517	0.250962	0.189919	0.312665	0.257373	0.277866	1.9169	1.57032	1.55827	1.61824	1.81398	1.73388		1.17345	0.134012		0.735528	0.217135		0.795428	0.0661684		1.15151	0.239308	+	5.9077	-0.943214	+	4.53789	0.422595
CPNE1	Copine-1		8	25.6	0	38.497	5839400000	0.227125	-0.109079	0.152378	0.0729976	0.040682	0.0503276	0.151599	0.246955	0.156785	0.095722	0.218719	0.0931545	-0.0891446	0.00173014	0.181929	-0.0151409	0.137504	0.103263	0.217603	0.179001	0.0928839	0.139208	0.146916	0.166458		0.129746	-0.0354724		1.35235	-0.0492479		0.248961	0.0437034		1.44722	0.0399615		0.168735	-0.0468894		0.171446	0.0586365
PPP2R4	Serine/threonine-protein phosphatase 2A activator		5	22.8	0	20.682	1780900000	-0.187001	-0.18894	-0.165208	0.0706641	NaN	-0.58072	0.0790197	NaN	NaN	NaN	-0.313567	0.264717	0.0360461	-0.199984	-0.335444	0.263515	NaN	NaN	-0.5174	-0.327566	-0.400758	-0.416365	-0.31919	-0.361009		0.0688608	-0.0789236		0	NaN		0	0.227469		0.0669209	-0.0176362	+	2.67796	0.20118		0.0436571	-0.013922
PSMD4	26S proteasome non-ATPase regulatory subunit 4		2	16.3	0	10.976	669960000	-0.183163	NaN	-0.150882	-0.121204	-0.241885	-0.112381	NaN	NaN	NaN	NaN	NaN	NaN	NaN	0.118626	NaN	NaN	NaN	NaN	NaN	NaN	NaN	NaN	NaN	0.436695		0.835523	0.0502295		-4.34e-08	0		0	NaN		0	NaN		0	NaN		0	-0.285648
TSPAN4	Tetraspanin;Tetraspanin-4		3	30.3	0	16.7	2631300000	-0.321063	0.679784	0.397693	0.735695	0.775093	NaN	-0.727523	-0.792432	-0.725041	NaN	-0.734059	-0.653083	-0.0239004	NaN	-0.356144	NaN	1.06771	0.0574155	2.10393	NaN	NaN	NaN	1.46665	NaN		0.353853	0.576033		1.17967	0.0651653		0	0.413559		0	NaN		0	NaN		0.451189	0.44216
PTTG1IP	Pituitary tumor-transforming gene 1 protein-interacting protein		3	29.9	0	14.443	1372100000	NaN	NaN	NaN	NaN	NaN	1.49713	-0.0497854	NaN	0.0339339	0.0803848	NaN	0.512682	0.736042	NaN	NaN	NaN	NaN	NaN	NaN	NaN	NaN	NaN	NaN	NaN		0	NaN		0.480184	0.304459		0	NaN		-4.34e-08	0		-4.34e-08	0		0	NaN
SRRM1	Serine/arginine repetitive matrix protein 1		4	6.9	0	10.849	1529400000	0.643764	NaN	0.276556	0.741057	0.466653	0.548338	0.332737	NaN	1.5102	NaN	NaN	1.10165	0.554147	0.945907	0.634872	0.921512	0.752663	0.501923	0.912573	0.421695	1.02715	0.214498	NaN	NaN		0.551062	0.184537		0	-0.408552		0.0243558	0.0137242		0	0.490879		0.0961718	-0.0942888		0.509108	-0.251482
TOM1	Target of Myb protein 1		3	16.7	0	11.243	465590000	NaN	NaN	NaN	NaN	NaN	NaN	NaN	NaN	NaN	NaN	NaN	NaN	NaN	NaN	NaN	NaN	NaN	NaN	-1.24229	-0.598959	NaN	-0.79809	NaN	NaN		-4.34e-08	0		-4.34e-08	0		-4.34e-08	0		0	-0.643335		0	NaN		-4.34e-08	0
EIF3L	Eukaryotic translation initiation factor 3 subunit L		30	51.2	0	191.63	20087000000	1.47124	1.21288	1.43226	1.44615	1.50472	1.25169	1.32987	1.21176	1.18574	1.27656	1.20032	1.29936	1.11417	0.971884	1.16684	1.05735	1.31034	1.24068	-1.43242	-1.41254	-1.39718	-1.39161	-1.2578	-1.45344		0.0678256	0.0287255		0.110056	0.0162882		0.381565	0.118491		0.105979	0.0192232	+	5.36924	2.77257		1.35499	0.28783
UBE2I	SUMO-conjugating enzyme UBC9		4	50	0	5.1674	640190000	-0.290039	NaN	NaN	NaN	-0.115848	-0.510375	NaN	NaN	NaN	NaN	-0.177262	-0.151266	NaN	-0.256425	NaN	-0.115707	-0.376339	0.0432046	0.208268	0.0805212	0.871449	NaN	0.316725	0.143394		0	NaN		0	NaN		0	-0.119914		0.191051	-0.213489		0	-0.766024		0	-0.0336142
ARCN1	Coatomer subunit delta		10	20.7	0	29.195	3235300000	-0.31502	-0.318632	0.153805	-0.113114	0.589476	0.119954	-0.361546	-0.231278	-0.439989	-0.454012	0.00259443	0.0147838	-0.198792	0.170053	-0.300537	0.356144	-0.193684	-0.00982928	-0.124299	0.306962	-0.042754	-0.51445	0.0453032	0.0352017		0.478135	0.35872		0.471523	0.198727		0.210473	0.160635		0.0805384	0.0688159		0.096046	-0.0765349		0.0837139	-0.0501902
TSPO	Translocator protein		3	36.4	0	22.448	2763700000	0.787014	0.428678	0.491494	NaN	0.686344	0.484293	NaN	0.243303	NaN	0.110631	0.305212	0.296663	-0.0420854	-0.169436	-0.142544	0.0263043	0.0542234	-0.0277779	-0.0391324	-0.0374732	0.0274371	-0.0213944	-0.025647	-0.050607		0.285849	0.125232		0	0.0619083		1.0068	0.135605		0.698285	-0.0279853	+	2.17583	0.579539	+	2.37575	0.687084
NRD1	Nardilysin		28	31.3	0	233.33	9318700000	1.57981	1.6783	2.67929	1.74868	NaN	1.48568	NaN	1.45675	2.2038	NaN	1.14039	0.843582	1.55248	2.15205	2.05134	1.90184	1.60886	2.01885	-1.72504	-1.62198	-1.72004	-1.71577	-1.47181	-1.56777		0.229536	-0.512368		0.450362	-0.838291		0.0980304	-0.07544		0.348378	0.0977239	+	3.31497	3.66506		0.0524294	0.0605091
PABPC4	Polyadenylate-binding protein;Polyadenylate-binding protein 4		2	20.3	0	18.238	942690000	0.40174	0.203139	0.553557	NaN	0.5614	0.358846	NaN	NaN	NaN	NaN	NaN	NaN	NaN	NaN	NaN	NaN	NaN	NaN	NaN	NaN	-0.453222	-0.160572	NaN	-0.200332		0.0878159	0.0817751		-4.34e-08	0		-4.34e-08	0		0	-0.03976	+	1.57138	0.693042		0	NaN
CD55	Complement decay-accelerating factor		15	39.9	0	71.255	20801000000	0.860049	0.733354	0.709114	0.91533	0.78576	1.04852	-0.591571	-0.363197	-0.263352	-0.307412	-0.288593	-0.416828	1.18618	1.11763	1.21711	1.2956	1.07121	1.08011	0.556405	0.153546	0.187261	0.0795658	0.594357	0.631058		0.588505	0.149029		0.192177	0.0684288		0.116636	-0.0246626		1.94344	0.453816	+	3.42444	0.627382	+	2.73857	-0.406134
EIF3H	Eukaryotic translation initiation factor 3 subunit H		6	27.6	0	24.703	7433500000	0.494979	0.0659858	0.0976109	-0.37516	-0.253446	-0.321027	-0.127447	-0.0802252	-0.0972703	-0.544098	NaN	-0.012068	NaN	0.0226164	NaN	NaN	NaN	0.0473989	0.067501	0.062398	-0.190437	-0.128141	-0.332208	0.119024		1.06005	-0.536069		0.201754	-0.165724		0	NaN		0.110059	0.0368324		0.902679	0.304919		0	0.196909
FNTA	Protein farnesyltransferase/geranylgeranyltransferase type-1 subunit alpha		5	35.1	0	21.84	2085200000	NaN	NaN	NaN	NaN	NaN	NaN	NaN	NaN	NaN	NaN	NaN	NaN	NaN	NaN	NaN	NaN	NaN	NaN	-1.10578	-0.990739	-0.456089	-1.34608	-0.963898	-1.38987		-4.34e-08	0		-4.34e-08	0		-4.34e-08	0		0.579388	-0.222214		0	NaN		-4.34e-08	0
CNN2	Calponin;Calponin-2		4	22.5	0	12.952	1713100000	NaN	-0.0221706	-0.178649	0.318693	0.0697022	0.104873	0.68437	NaN	0.406537	0.22848	0.684998	0.332737	0.57918	NaN	0.25181	NaN	1.14052	NaN	0.452701	0.735955	0.214	0.711231	0.4728	0.487384		0.522146	0.187698		0.400303	-0.264845		0	NaN		0.169237	-0.0827675	+	1.19716	-0.654139		0.980405	-0.515905
CLN3	Battenin	+	4	26.2	0	8.519	1750600000	0.719315	NaN	NaN	NaN	1.99103	NaN	-0.373178	NaN	-0.477522	0.546956	NaN	NaN	0.52657	NaN	0.63385	1.36597	1.29602	NaN	0.807849	0.759071	NaN	0.408277	NaN	NaN		0	NaN		0	0.920134		0	0.839403		0	0.0487789		0	0.135641		0	0.139105
COPS2	COP9 signalosome complex subunit 2		7	28.2	0	22.593	2686100000	NaN	-0.115723	-0.0228447	-0.756526	-0.406981	-0.552622	NaN	NaN	NaN	NaN	NaN	0.342668	NaN	0.206893	NaN	0.0515809	NaN	-0.22398	-0.0947107	-0.230093	-0.131692	0.070252	-0.392137	-0.145781		0.744752	-0.410518		0	NaN		0	NaN		0.337563	-0.113698		0.0808584	0.0278942		0	-0.276177
CS	Citrate synthase;Citrate synthase, mitochondrial		11	38.6	0	79.945	8447800000	-0.688009	-0.696915	-0.515852	-0.505943	-0.679897	-0.655285	-0.519983	-0.699091	-0.576992	-0.725971	-0.807831	-0.684874	-0.0417587	-0.43049	-0.634509	-0.397619	-0.448647	-0.498851	0.1503	0.177344	0.00949053	0.181039	0.147958	0.00662125		0.0704611	0.0198835		1.30548	-0.14087		0.194459	-0.0794533		0.0768197	-0.0209981	+	3.12081	-0.756216		0.652048	-0.264673
CARS	Cysteine--tRNA ligase, cytoplasmic		9	15.6	0	33.687	2158300000	1.06674	NaN	0.592445	0.701239	0.593019	0.742006	NaN	0.840282	0.757535	0.20389	0.503247	1.12479	0.367595	0.439676	0.472696	NaN	0.394953	0.178746	0.199751	-0.0982893	-0.132483	-0.0218629	-0.0934326	-0.0904343		0.126525	-0.107972		0.0120213	0.0151105		0.39375	-0.169336		0.303502	0.0895064	+	1.81942	0.913806		0.948046	0.402939
NQO1	NAD(P)H dehydrogenase [quinone] 1		9	48.5	0	48.682	10206000000	1.08052	1.21388	0.950916	0.933119	1.18593	1.00648	1.06295	1.04474	0.655718	0.979733	0.879392	0.760519	0.68912	0.726221	0.719665	0.727267	0.848157	0.918844	0.0593554	-0.127557	-0.0204136	-0.0436905	0.0281448	-0.135332		0.245867	-0.0399289		0.214818	-0.0479229		0.908481	0.119754		0.213586	0.0479431	+	3.80523	1.14566	+	2.06973	0.370102
SEC61A1	Protein transport protein Sec61 subunit alpha isoform 1		6	28.6	0	19.706	5437200000	0.43328	0.461005	0.79585	0.606253	0.251689	-0.0524909	0.22033	0.313014	0.207143	0.287236	0.548141	0.0473989	0.171463	0.0747794	0.0908535	-0.107026	0.311503	-0.172083	-0.0593897	-0.135396	-0.207944	-0.032551	-0.0579022	-0.0296617		0.370006	-0.294895		0.143459	0.0474296		0.215177	-0.101567		0.669061	0.0763125	+	2.24957	0.688675	+	1.6999	0.451013
PTPN1	Tyrosine-protein phosphatase non-receptor type;Tyrosine-protein phosphatase non-receptor type 1		4	11.9	0	7.245	465440000	NaN	NaN	NaN	NaN	NaN	NaN	NaN	NaN	NaN	NaN	NaN	NaN	NaN	NaN	NaN	NaN	NaN	NaN	-0.0571665	NaN	NaN	NaN	NaN	-0.257666		-4.34e-08	0		-4.34e-08	0		-4.34e-08	0		0	NaN		-4.34e-08	0		-4.34e-08	0
TMBIM1	Protein lifeguard 3		2	28.3	0	8.7587	488000000	0.45607	0.563549	NaN	NaN	0.764941	NaN	-0.173482	NaN	NaN	-0.163349	-0.0614507	-0.0566112	NaN	NaN	0.349818	NaN	NaN	NaN	NaN	NaN	NaN	NaN	NaN	NaN		0	0.201392		0	0.0101334		0	NaN		-4.34e-08	0		0	NaN		0	0.159991
ILF2	Interleukin enhancer-binding factor 2		8	38.9	0	30.745	4251800000	-0.374187	-0.615221	-0.0662612	-0.616702	-0.263179	-0.384678	-0.106731	-0.173287	-0.0597506	-0.254083	-0.146499	-0.377032	-0.0421597	-0.662437	-0.626224	-0.139172	-0.990137	-0.535708	-0.0737121	-0.0118352	-0.0932787	-0.00837747	-0.0757481	0.0174944		0.111401	-0.0696299		0.553623	-0.145949		0.342714	-0.111399		0.0725612	-0.00615814		0.908976	-0.314059		0.131685	0.0917172
MAPK14	Mitogen-activated protein kinase 14		1	21.6	0	7.3946	129360000	NaN	NaN	NaN	NaN	NaN	NaN	NaN	NaN	NaN	NaN	NaN	NaN	NaN	NaN	NaN	NaN	NaN	NaN	NaN	-0.712764	NaN	-0.725828	NaN	NaN		-4.34e-08	0		-4.34e-08	0		-4.34e-08	0		0	NaN		0	NaN		-4.34e-08	0
STK25;STK26	Serine/threonine-protein kinase 25;Serine/threonine-protein kinase 26		2	29.7	0	14.243	1155400000	-0.251882	NaN	-0.309967	NaN	0.00647761	-0.299507	NaN	NaN	NaN	-0.0273514	NaN	NaN	NaN	-0.680752	NaN	-0.864754	NaN	NaN	NaN	-0.0581726	-0.268365	-0.0802252	NaN	0.10675		0	0.0104603		0	NaN		0	NaN		0	0.186976		0.69866	-0.145337		0	0.399827
2002-09-01	Septin-2		12	49.5	0	76.807	6497000000	0.965618	0.802648	0.794021	0.756596	1.00353	0.662935	0.546265	0.48388	0.612494	0.697151	NaN	0.65764	0.69207	0.615322	0.873734	0.71396	0.852318	0.606916	-0.90018	-0.902956	-0.861946	-0.829793	-0.78024	-0.921663		0.126473	-0.0464086		0.501803	0.0980161		0.0055988	-0.00264414		0.0153318	-0.00246282	+	5.06261	1.71899		0.599959	0.127053
RFT1	Protein RFT1 homolog		5	9.8	0	6.2169	760840000	NaN	NaN	NaN	NaN	NaN	0.142087	NaN	NaN	-0.0327723	NaN	NaN	NaN	NaN	NaN	NaN	NaN	NaN	NaN	-1.08235	-1.12042	-1.04047	-1.04784	-0.901904	-0.749548		0	NaN		0	NaN		-4.34e-08	0		0.764836	0.158311		0	NaN		-4.34e-08	0
RAN	GTP-binding nuclear protein Ran		11	68.2	0	36.801	29821000000	-0.000317429	-0.0956045	-0.0664424	-0.193255	-0.0489942	-0.102388	-0.0726344	-0.157254	-0.167912	-0.203618	-0.137711	-0.128677	-0.178731	-0.0279692	-0.223812	-0.107073	0.0119249	-0.109654	0.265077	0.197488	0.125916	0.236585	0.26123	0.195221		0.320298	-0.0607576		0.15603	-0.0240685		1.13711	0.0752364		0.392298	0.0538467	+	2.30352	-0.240784		0.611557	0.0893824
EIF3C;EIF3CL	Eukaryotic translation initiation factor 3 subunit C;Eukaryotic translation initiation factor 3 subunit C-like protein		17	22	0	55.324	6576700000	0.259664	0.326307	0.350045	0.360982	0.464877	0.365581	0.136191	0.513794	0.29066	0.50518	0.0973411	0.170182	0.251446	0.226262	0.186881	0.314639	0.16954	0.240375	-0.372524	-0.322253	-0.16246	-0.204316	-0.298105	-0.195219		0.84038	0.0851414		0.0810887	-0.0559811		0.183735	0.0199883		0.529158	-0.0589397	+	3.22592	0.541682		1.28788	0.0904756
ACADM	Medium-chain specific acyl-CoA dehydrogenase, mitochondrial		21	60	0	284.09	137750000000	4.63813	4.6279	4.33428	4.11761	4.39527	4.23243	-1.3541	-1.42248	-1.37591	-1.33905	-1.29011	-1.27299	-0.849128	-0.910095	-0.887286	-0.912021	-0.953858	-0.90123	4.8484	4.87184	4.72285	4.90265	4.98968	4.5015		0.830689	-0.285001		0.849303	0.0834429		0.974921	-0.0401998		0.0908866	-0.0525867	+	1.23146	-0.299011	+	6.13679	5.41561
GPR89A;GPR89B	Golgi pH regulator A;Golgi pH regulator B		2	11.3	0	10.917	514630000	NaN	NaN	NaN	NaN	NaN	NaN	NaN	NaN	NaN	NaN	NaN	NaN	NaN	-0.0493375	NaN	NaN	NaN	NaN	NaN	NaN	0.424707	0.263275	0.449535	0.356256		-4.34e-08	0		-4.34e-08	0		0	NaN		0.476401	0.0589047		0	NaN		0	NaN
SCARB1	Scavenger receptor class B member 1		14	27.4	0	33.102	7182400000	0.566474	0.622368	0.576861	0.89103	0.74743	0.900026	-0.196128	-0.157287	-0.312671	-0.176642	-0.114004	-0.122947	0.480472	0.397693	0.151729	0.444773	0.419215	0.521051	0.738033	0.859652	0.747602	0.797677	1.00187	0.904195		1.21997	0.257595		0.594122	0.0841642		0.348417	0.118382		0.266221	0.0797237	+	2.35991	-0.213076		1.1511	0.24527
TCEB2	Transcription elongation factor B polypeptide 2		2	16.8	0.00056657	3.2681	455970000	NaN	NaN	0.152897	0.179638	NaN	NaN	NaN	NaN	NaN	NaN	NaN	NaN	NaN	NaN	NaN	0.608526	NaN	0.484396	NaN	NaN	NaN	NaN	NaN	NaN		0	NaN		-4.34e-08	0		0	NaN		-4.34e-08	0		0	NaN		0	NaN
SSR1	Translocon-associated protein subunit alpha		3	12.8	0	19.55	2870600000	NaN	2.35876	1.87121	1.77812	1.39045	1.38123	0.456386	-0.333134	NaN	0.16954	NaN	0.4728	0.151989	0.0745054	-0.150129	-0.0233138	-0.241885	NaN	-1.05265	-1.08528	-1.31804	-1.10743	-1.18243	-1.25549		0.695133	-0.72915		0	-0.286845		0.749839	-0.245846		0.025609	0.00672499	+	3.2746	3.28524	+	2.62926	2.08953
RPL37A	60S ribosomal protein L37a		3	48.3	0	9.2073	3172300000	-0.276101	-0.0552914	-0.0875188	-0.36576	-0.234873	-0.25484	-0.234279	0.161565	0.260387	-0.0779545	-0.0900503	-0.260722	-0.0960825	-0.140571	-0.222633	-0.155213	0.359859	-0.190223	0.577054	0.336055	0.300885	0.280719	0.808838	0.385486		1.45035	-0.145521		0.391161	-0.205467		0.338782	0.157903		0.859653	0.284573	+	2.48845	-0.445523		0.0596232	0.0134585
MYADM	Myeloid-associated differentiation marker		2	14.9	0	8.6397	1809100000	0.469052	NaN	0.431783	NaN	NaN	NaN	NaN	-0.0270427	NaN	NaN	NaN	-0.153575	NaN	-0.192019	NaN	NaN	NaN	-0.257839	0.305679	0.578407	0.27023	NaN	0.173	0.608526		0	NaN		0	NaN		0	NaN		0.549779	-0.18498		0.0545661	0.0260993		0	0.642437
PLSCR1	Phospholipid scramblase 1		8	27.7	0	73.83	18866000000	2.31829	2.12717	2.26291	2.44776	2.33725	2.42212	0.901494	0.838266	0.943209	0.817296	0.83762	0.849679	0.227371	0.213503	0.170438	0.357721	0.167358	0.210264	2.25308	2.10598	2.04198	2.22592	2.16797	2.38698		1.71098	0.166257		0.740705	-0.059458		0.298986	0.0413437		2.30769	0.144715		0.642974	0.111497	+	5.36396	2.03235
PSPH	Phosphoserine phosphatase		4	20.3	0.0030503	1.9988	600090000	0.0824301	0.572308	0.669118	NaN	NaN	NaN	-0.0668504	NaN	NaN	NaN	NaN	NaN	0.0492126	NaN	0.180657	0.0280033	NaN	-0.248451	0.488309	0.52707	0.369494	NaN	0.135141	NaN		0	NaN		0	NaN		0.329235	-0.225158		0.402688	-0.136557		0.00934142	-0.00699731		0.574686	0.32635
GPS1	COP9 signalosome complex subunit 1		4	24	0	25.643	2266000000	-0.0754592	-0.1882	-0.138187	-0.251127	-0.0854508	-0.329196	-0.0546919	0.169412	0.0736831	NaN	0.201759	0.234746	-0.0656873	-0.191903	0.10541	0.189287	0.133169	-0.231854	-0.201062	-0.12762	-0.127321	-0.345546	-0.308805	-0.177523		0.342895	-0.0879755		0.427334	0.0967053		0.13243	0.0809276		0.0939198	-0.0289676		0.344221	0.0662135		0.379457	-0.0832221
APEH	Acylamino-acid-releasing enzyme		8	11.5	0	12.75	1210600000	NaN	NaN	0.0154976	-0.167426	NaN	NaN	-0.600009	-0.840242	-0.190059	NaN	-0.40072	-0.661136	-0.273082	-0.617676	-0.559898	-0.147538	NaN	NaN	0.204516	-0.130018	-0.0680447	0.0182068	-0.18061	0.14496		0	NaN		0.00968456	-0.015778		0	0.125544		0.334273	0.116241		0	0.0754495		0	0.49905
GNB2;GNB1	Guanine nucleotide-binding protein G(I)/G(S)/G(T) subunit beta-2		2	32.3	0	8.0642	32643000000	-0.282141	-0.17994	-0.325937	1.82684	0.89817	1.74175	0.355242	0.414569	0.726308	NaN	1.82863	2.90862	1.55567	0.561204	1.6377	0.735782	1.37568	1.64672	1.30515	0.179638	0.62882	1.49513	0.934781	1.60017	+	1.45505	1.75159		0.872961	1.79819		0.000781932	0.00120028		0.615312	0.512173	+	1.24551	-1.03054	+	1.91273	-1.5142
ATP5J2-PTCD1;ATP5J2	ATP synthase subunit f, mitochondrial		1	57.4	0	8.0563	13999000000	-0.15449	1.36754	-0.221253	1.44031	1.34608	1.52331	1.23952	0.812457	0.81705	1.33526	1.43957	1.11317	0.981999	0.860685	1.25966	0.858061	0.655169	1.06688	1.22416	1.12895	1.07279	1.13212	0.848878	1.20864		0.722164	1.10597		0.79676	0.339655		1.68747	-0.174079		0.0545829	-0.0173923		0.683824	-0.780688		0.590656	-0.703517
STARD3NL	MLN64 N-terminal domain homolog		3	16.5	0	8.4873	737180000	NaN	NaN	NaN	1.70828	NaN	NaN	NaN	NaN	NaN	NaN	NaN	NaN	NaN	NaN	3.17854	NaN	NaN	NaN	NaN	-0.611403	-0.687474	-0.495735	NaN	-0.629858		0	NaN		-4.34e-08	0		0	NaN		0	-0.134123		0	NaN		0	NaN
RPL24	60S ribosomal protein L24		8	45.5	0	34.133	28853000000	-0.090849	-0.13957	-0.229129	-0.194955	-0.315235	-0.165806	0.133958	0.0514416	0.169412	0.117163	0.0888201	0.149259	-0.04497	0.0174944	0.013641	0.00733906	-0.0942332	0.0915306	0.262193	0.213503	0.242938	0.127765	0.171847	0.180657		0.381463	-0.0721499		0.00237152	0.000143578		0.0329646	0.00615705		0.0830816	0.0101637	+	2.5481	-0.347918		1.51684	-0.148571
CHCHD3	MICOS complex subunit MIC19	+	13	46.6	0	70.978	24501000000	-1.17202	-1.16152	-1.17446	0.375846	0.255803	0.267476	-0.87382	-0.910204	-0.940451	0.163112	0.160791	0.241596	0.56589	0.53097	0.528471	1.72731	1.61462	1.5913	1.33474	0.0381553	0.130535	0.11929	1.3376	1.36882	+	3.12943	1.46904	+	2.79799	1.09666	+	3.131	1.10263	+	3.36977	1.25106	+	5.7606	-1.26533	+	7.73813	-1.71111
NAP1L4	Nucleosome assembly protein 1-like 4		4	24.5	0	20.482	958430000	-0.143835	-0.348666	0.0388575	NaN	-0.244377	0.0124972	NaN	0.100574	-0.273814	NaN	NaN	-0.0257938	NaN	-0.352271	NaN	NaN	NaN	-0.235348	-0.276747	-0.278409	-0.252415	-0.0989844	-0.0636051	0.0213375		0.182029	0.038964		0	0.24802		0	NaN		0.702084	0.103598		0.178259	0.0587216		0	0.201057
EIF4G2	Eukaryotic translation initiation factor 4 gamma 2		21	29.4	0	48.555	7696000000	0.827656	1.02027	1.12994	0.917394	1.05963	0.805788	0.411209	0.416948	0.625364	0.871607	0.650673	0.651316	0.638398	0.682483	0.299714	0.556699	0.820159	0.496922	0.22367	-0.00345221	-0.105597	-0.0427391	-0.0460271	-0.0718305		0.175582	-0.0650188		0.708105	0.240025		0.372099	0.084395		0.430156	0.0858669	+	3.44001	1.04322	+	1.40761	0.452425
PPP3R1	Calcineurin subunit B type 1	+	2	76.2	0	90.874	17439000000	-0.919615	-0.956655	-1.17127	1.40201	1.45523	1.25139	-0.00697059	-0.0977797	0.0762854	1.72456	1.44164	1.70757	1.00913	0.9151	0.914794	2.22999	2.52644	2.33216	1.82944	0.259905	0.31429	0.213876	1.51081	1.71576	+	3.74406	2.38539	+	2.9391	1.63408	+	2.20251	1.41652	+	2.19099	1.42265	+	3.97134	-1.27854	+	4.69087	-1.96219
RPL32	60S ribosomal protein L32		16	61.7	0	149.91	242460000000	-0.087764	-0.168998	-0.0733478	-0.182655	-0.21245	-0.214893	0.143785	0.170951	0.149259	0.191563	0.0812032	-0.0148785	0.0436244	-0.0171104	0.0816123	0.0126402	-0.0112971	0.0847447	0.329755	0.28404	0.28629	0.333653	0.239154	0.378512		1.0908	-0.0932962		0.416028	-0.0687026		0.223037	-0.00734619		0.16454	0.0144792	+	3.5782	-0.411364		1.61543	-0.146079
HNRNPD	Heterogeneous nuclear ribonucleoprotein D0		6	39.8	0	54.058	3954200000	-0.159057	-0.000634928	-0.254978	-0.395454	-0.355701	-0.314894	NaN	0.065848	-0.0549468	-0.337448	-0.169907	NaN	-0.164739	-0.426722	-0.343183	NaN	-0.0923248	-0.398627	0.15549	-0.208211	0.122739	-0.198841	0.00173014	0.122076		0.89643	-0.217126		0	-0.235755		0.218532	0.139477		0.457073	0.18787		0.120368	-0.0434523		0.742608	0.173325
AMACR	Alpha-methylacyl-CoA racemase		6	23.4	0	23.828	1268000000	NaN	NaN	NaN	NaN	NaN	NaN	NaN	NaN	NaN	NaN	NaN	NaN	NaN	NaN	NaN	NaN	NaN	NaN	-0.877738	-1.27449	-1.56439	-1.13565	-1.07288	-1.40813		-4.34e-08	0		-4.34e-08	0		-4.34e-08	0		0.31588	0.205264		0	NaN		-4.34e-08	0
EIF4E	Eukaryotic translation initiation factor 4E		4	15.9	0	5.4616	1063500000	0.458067	NaN	NaN	NaN	NaN	NaN	NaN	NaN	NaN	0.488721	NaN	NaN	NaN	NaN	NaN	NaN	NaN	NaN	-0.962519	-0.891429	-0.950063	-1.02794	-0.870308	-1.16291		0	NaN		0	NaN		-4.34e-08	0		0.239302	-0.0421031		0	1.41454		0	NaN
2011-09-01	Septin-11		6	26.6	0	29.629	2878300000	0.577828	0.688494	0.583808	0.347212	0.402831	0.376179	-0.343092	0.722379	0.715103	0.344601	NaN	0.230326	0.573278	0.809085	0.649293	0.0903115	0.453228	1.05651	-0.373888	-0.55167	-0.426199	0.0396999	-0.610587	-0.373215		2.04191	-0.241302		0.0501698	0.101458		0.18288	-0.143868		0.299706	-0.139841	+	2.1458	0.929433		0.316583	-0.060509
SEC31A	Protein transport protein Sec31A		5	6.3	0	12.167	860720000	-0.618916	-0.464345	-0.353303	NaN	-0.353727	-0.78819	NaN	NaN	-0.207728	NaN	-0.00403071	NaN	-0.304167	-0.334898	0.0821575	-0.432163	NaN	NaN	-0.0777413	NaN	-0.047234	-0.0573016	NaN	-0.225565		0.181399	-0.162135		0	NaN		0	-0.127996		0	-0.168263	+	1.6322	-0.426587		0.882822	-0.293219
COX7A2	Cytochrome c oxidase subunit 7A2, mitochondrial		2	25.3	0	6.0142	1296600000	1.44969	2.08678	1.26105	NaN	NaN	NaN	-0.559409	NaN	NaN	NaN	NaN	NaN	-1.34556	NaN	NaN	NaN	NaN	NaN	-1.82322	-2.04495	NaN	NaN	-1.71795	-2.18567		0	NaN		0	NaN		0	NaN		0	0.221737		0	3.64413		0	2.94474
OPA1	Dynamin-like 120 kDa protein, mitochondrial;Dynamin-like 120 kDa protein, form S1		17	22.5	0	42.645	2752700000	1.47467	1.23438	1.32268	1.15088	1.65077	1.60483	0.836005	1.16851	1.07224	0.990447	NaN	NaN	0.883386	1.08052	0.645333	1.02652	NaN	1.67969	-0.212935	-0.138966	-0.0668353	-0.326335	-0.312653	-0.0947107		0.194976	0.124918		0	0.154442		0.384615	0.588746		0.0691607	-0.0293875	+	3.88897	1.52129	+	1.52035	0.474162
TCEB1	Transcription elongation factor B polypeptide 1		3	55.4	0	8.7648	693660000	NaN	NaN	NaN	-0.309949	NaN	NaN	NaN	0.15082	NaN	NaN	NaN	NaN	NaN	NaN	NaN	NaN	NaN	NaN	0.266877	-0.147202	0.698485	0.671927	-0.0880247	0.525367		0	NaN		0	NaN		-4.34e-08	0		0.175625	-0.172997		0	NaN		-4.34e-08	0
RPL30	60S ribosomal protein L30		7	64.9	0	56.989	9407600000	-0.0613604	-0.176365	-0.142417	-0.093094	-0.224655	-0.232328	0.0443242	0.121679	0.141956	-0.125935	-0.0942948	0.0951818	0.0132121	0.0110662	-0.0414468	-0.19075	-0.231498	0.0226164	0.176578	0.179638	0.0798389	0.185359	0.195852	0.373286		1.08607	-0.0566449		0.983647	-0.144336		0.498861	-0.127488		0.670567	0.100293	+	2.3262	-0.274993		1.45848	-0.120991
SLC39A14	Zinc transporter ZIP14		3	29	0	20.424	2634700000	NaN	0.719227	0.321697	0.245009	0.482022	0.720103	0.477367	0.258579	0.216362	NaN	NaN	NaN	0.462471	0.52697	-0.506722	NaN	NaN	NaN	-0.102063	-0.370639	-0.272158	-0.341647	-0.0827439	-0.0958666		0.0747513	0.0806006		0	NaN		0	NaN		2.00398	0.23459	+	1.93817	0.84861		0.311343	0.359556
SKP1	S-phase kinase-associated protein 1		4	37.4	0	19.715	2244700000	-0.367881	-0.401387	-0.0163953	-0.285917	-0.549662	-0.211081	NaN	-0.437955	NaN	-0.269373	NaN	0.144438	0.325041	-0.0415359	-0.0525807	-0.0668806	0.063641	-0.0788837	0.208642	0.0529723	0.237074	-0.0875647	0.160146	0.116897		0.380774	-0.086999		0	NaN		0.25529	-0.104349		0.408428	0.0944011		0.997315	-0.329382		0.904554	-0.338862
COPS6	COP9 signalosome complex subunit 6		4	15.6	0	5.4729	598700000	NaN	NaN	NaN	NaN	NaN	NaN	NaN	NaN	NaN	NaN	NaN	NaN	NaN	NaN	NaN	NaN	NaN	NaN	0.32458	NaN	-0.0393845	-0.000418409	-0.523898	NaN		-4.34e-08	0		-4.34e-08	0		-4.34e-08	0		0	-0.484514		0	NaN		-4.34e-08	0
KIAA0319L	Dyslexia-associated protein KIAA0319-like protein		3	3.5	0	5.5258	480660000	NaN	NaN	1.83782	NaN	NaN	NaN	-0.291716	-0.524334	-0.525663	-0.553892	-0.0506668	-0.216803	0.353549	-0.0943718	0.0734089	-0.047741	NaN	0.0532504	NaN	NaN	NaN	NaN	NaN	NaN		0	NaN		0.285668	0.17345		0.329711	-0.210724		-4.34e-08	0		0	NaN		0	1.72696
2007-09-01	Septin-7		9	30.4	0	46.884	5797300000	0.56881	0.705491	0.667574	0.588804	0.783415	0.649753	0.57192	0.52095	0.501108	0.721416	0.543892	0.56589	0.557974	0.543991	0.714575	0.672199	0.518031	0.849439	-0.502914	-0.494393	-0.519011	-0.501279	-0.608936	-0.830306		0.357759	0.0266989		0.775707	0.0790734		0.554659	0.0743766		0.558041	-0.142491	+	5.00394	1.15219		0.241698	0.0417788
EZR	Ezrin		17	46.1	0	92.931	20264000000	0.522658	0.204266	0.366588	0.557778	0.570171	0.383055	0.510456	0.632827	0.532467	0.624054	0.58111	0.615605	0.599318	0.588325	0.531868	0.409038	0.350384	0.337426	-0.222077	-0.314194	-0.65872	-0.348041	-0.499565	-0.327204		0.462276	0.139164		0.354865	0.04834		2.27175	-0.207554		0.820714	0.0907032	+	2.30882	0.804823		1.03975	-0.208666
ERMP1	Endoplasmic reticulum metallopeptidase 1		6	9	0	9.3895	773090000	NaN	NaN	NaN	NaN	NaN	NaN	NaN	-0.372206	-0.340624	0.067501	NaN	NaN	NaN	-2.86881	NaN	NaN	NaN	NaN	-0.663831	-1.64368	-0.879781	-0.447288	NaN	-0.366839		-4.34e-08	0		0	NaN		0	NaN		0.34887	0.530147		0	NaN		0	NaN
SYS1-DBNDD2;SYS1	Protein SYS1 homolog		1	28.2	0	4.1516	1475700000	NaN	NaN	NaN	NaN	NaN	NaN	NaN	NaN	NaN	NaN	NaN	NaN	NaN	NaN	NaN	NaN	NaN	NaN	NaN	-1.28335	-1.05101	NaN	NaN	-1.19383		-4.34e-08	0		-4.34e-08	0		-4.34e-08	0		0	NaN		0	NaN		-4.34e-08	0
TCOF1	Treacle protein		5	3.7	0.004	1.857	1240300000	NaN	NaN	-0.333716	-0.338633	-0.148817	-0.376227	0.761455	NaN	0.579566	0.275365	0.531569	-0.104899	NaN	NaN	NaN	NaN	NaN	NaN	NaN	0.173511	0.280362	NaN	0.488206	0.783834		0	-0.0425107		0.971133	-0.585278		-4.34e-08	0		0	0.207844		0	-0.560653		0	NaN
BZW2	Basic leucine zipper and W2 domain-containing protein 2		21	56.4	0	114.62	9855600000	0.702569	0.667302	0.830661	0.739589	0.730227	0.684729	0.245374	0.255561	0.276199	0.497331	0.351402	0.35321	0.0583859	0.406863	0.415001	0.496002	0.350271	0.273098	0.209141	0.175557	0.265797	0.2587	0.213129	0.193204		0.0771249	-0.0153289		0.902517	0.141603		0.153568	0.0797069		0.3368	-0.0281928	+	3.0179	0.500159	+	1.58386	0.440094
MAP4	Microtubule-associated protein;Microtubule-associated protein 4		14	8.1	0	41.471	4424800000	-0.130129	0.0464211	0.285698	-0.140046	0.120883	-0.214675	-0.264946	4.06721	0.448478	0.151469	NaN	0.00158601	0.114234	-0.467474	-0.226915	-0.122334	NaN	-0.355775	0.0791561	-0.379113	-0.32648	-0.45255	-0.464345	-0.215697		0.298695	-0.145277		0.00986769	-0.0152385		0.738798	-0.182714		0.400703	0.185752	+	1.6431	0.453378		0.557447	0.260715
KLC1	Kinesin light chain 1		13	29.9	0	62.213	4401700000	1.48001	NaN	1.65393	NaN	1.18973	1.19276	NaN	1.5477	NaN	0.756511	NaN	0.70115	NaN	1.38223	1.37318	0.754374	0.875544	1.14137	-0.891429	-1.37636	-0.979743	-1.153	-0.966771	-1.0999		0	-0.461169		0	NaN		0.644276	-0.369244		0.458281	0.183667	+	3.34704	2.73667		0.790998	0.189269
EIF4B	Eukaryotic translation initiation factor 4B		6	12.3	0	11.966	11538000000	NaN	NaN	-0.221304	0.196481	0.273814	NaN	NaN	NaN	NaN	5.11878	NaN	NaN	NaN	NaN	NaN	NaN	-0.382645	0.013498	-1.87054	-1.94142	-2.03967	-1.85554	NaN	NaN		0	NaN		0	NaN		0	NaN		0	0.0708749		0	1.72424		0	NaN
CALD1	Caldesmon		10	22.1	0	25.49	1659500000	0.636451	1.21369	1.11103	0.763327	0.354001	1.07437	0.82073	0.869871	1.48517	0.572017	0.671837	0.835682	1.04376	0.709555	1.16446	1.12585	0.927669	0.994507	-0.455989	-0.472569	-0.444047	-0.283773	-0.16681	-0.479573		0.31049	-0.256492		0.903943	-0.365412		0.131177	0.0434138		0.0791112	0.0326721	+	2.75171	1.38719		0.0215491	0.0144624
RBBP7	Histone-binding protein RBBP7		2	12.5	0	5.9713	550610000	NaN	NaN	NaN	NaN	NaN	NaN	-0.142943	NaN	NaN	NaN	NaN	NaN	NaN	NaN	NaN	NaN	NaN	NaN	NaN	-0.516553	0.107554	NaN	0.0326651	-0.485822		-4.34e-08	0		0	NaN		-4.34e-08	0		0	-0.0748888		0	NaN		-4.34e-08	0
HNRNPH1;HNRNPH2	Heterogeneous nuclear ribonucleoprotein H;Heterogeneous nuclear ribonucleoprotein H, N-terminally processed;Heterogeneous nuclear ribonucleoprotein H2		8	32.6	0	97.869	9710700000	-0.0762195	-0.0500244	-0.0861858	-0.0980731	-0.0351652	-0.118758	0.395502	0.00891703	0.178619	0.451013	0.366364	0.283685	0.258459	0.127237	0.195474	0.306262	0.0714881	0.158079	0.216734	0.229834	0.198997	0.31487	0.0560286	0.157173		0.341628	-0.013189		0.686114	0.172675		0.16599	-0.0151135		0.8223	-0.104589	+	3.03304	-0.31871	+	2.59163	-0.264533
SMC4	Structural maintenance of chromosomes protein;Structural maintenance of chromosomes protein 4		9	8.1	0	13.277	622470000	NaN	0.322043	NaN	0.269751	0.0377336	0.169925	NaN	0.562963	0.495286	NaN	NaN	NaN	0.265917	NaN	NaN	0.208767	NaN	NaN	-0.291327	NaN	-0.557051	-0.154249	-0.163963	0.0193461		0	-0.28431		0	NaN		0	-0.05715		0.628463	0.283342		0	0.677694		0	0.0561267
FUBP1	Far upstream element-binding protein 1		11	22.4	0	49.735	4819000000	0.113567	0.127105	0.0662615	-0.0142518	0.0953169	0.1121	0.113167	-0.0383915	0.052555	0.0210533	0.0196308	0.00733906	0.310922	0.297954	0.254231	0.436268	-0.0761738	0.00920381	-0.14709	-0.189088	0.0508847	-0.0467571	-0.158043	-0.0766302		0.276536	-0.037923		0.213551	-0.0264358		0.413226	-0.164603		0.326074	-0.065601		1.06926	0.163965		2.7413	-0.185391
DLD	Dihydrolipoyl dehydrogenase;Dihydrolipoyl dehydrogenase, mitochondrial		7	16.7	0	21.566	2654000000	0.0524158	-0.0864767	-0.181231	-0.350081	-0.117521	0.0482362	-0.26701	-0.300342	-0.221186	-0.202373	0.350384	NaN	0.00776951	-0.181771	-0.14709	-0.359749	-0.180299	-0.185737	0.104471	0.0434844	0.0760118	-0.245711	0.15043	0.0655723		0.127107	-0.0680247		0.359548	0.357682		0.434457	-0.134898		0.68098	0.148896		0.0858118	-0.0296924		0.146633	0.0352666
NUP155	Nuclear pore complex protein Nup155		15	15	0	33.28	2990200000	0.59579	0.142609	0.431356	0.250113	-0.19446	0.504366	-0.242823	-1.12325	0.659285	-0.497975	-0.14618	NaN	0.930245	NaN	0.358059	NaN	-0.0506518	NaN	-0.572351	-0.0131886	-0.307644	-0.417271	-0.423197	-0.40811		0.554285	-0.203245		0.178738	0.360957		0	NaN		0.485315	-0.221852	+	1.62328	0.635953		0.375803	-0.254234
TBL2	Transducin beta-like protein 2		8	20.9	0	19.479	544900000	NaN	0.113967	0.194087	0.339251	NaN	0.191942	NaN	0.99458	NaN	NaN	NaN	NaN	NaN	-0.417733	NaN	NaN	NaN	NaN	-0.76344	-0.240793	-0.547974	-0.454012	-0.675973	-0.886246		0	-0.00214551		0	NaN		0	NaN		1.0261	-0.36096	+	1.73799	0.568287		0	0.57176
OGDH	2-oxoglutarate dehydrogenase, mitochondrial		6	10.3	0	7.4798	516250000	NaN	NaN	NaN	-0.365964	0.262313	-0.162573	NaN	0.888695	NaN	NaN	NaN	NaN	NaN	NaN	NaN	NaN	NaN	NaN	0.568032	0.24817	NaN	0.23352	1.30702	NaN		0	NaN		0	NaN		-4.34e-08	0		0	0.319862		0	NaN		-4.34e-08	0
PPP2R5D	Serine/threonine-protein phosphatase 2A 56 kDa regulatory subunit delta isoform		2	6.9	0	8.5761	444300000	NaN	0.147437	NaN	NaN	NaN	NaN	NaN	NaN	NaN	NaN	NaN	NaN	NaN	NaN	NaN	NaN	NaN	NaN	NaN	0.0126402	-0.202074	NaN	-0.139712	-0.11391		0	NaN		-4.34e-08	0		-4.34e-08	0		0	0.0623614		0	0.242154		0	NaN
RPS6KA1	Ribosomal protein S6 kinase;Ribosomal protein S6 kinase alpha-1		6	14.8	0	12.582	337130000	NaN	NaN	NaN	NaN	NaN	NaN	NaN	NaN	NaN	NaN	NaN	NaN	NaN	NaN	NaN	NaN	NaN	NaN	-1.96804	-1.34293	NaN	-0.322595	-0.165661	NaN		-4.34e-08	0		-4.34e-08	0		-4.34e-08	0		0	-0.625113		0	NaN		-4.34e-08	0
COPS8	COP9 signalosome complex subunit 8		7	74.6	0	24.812	2289000000	-0.364478	NaN	-0.428663	-0.220917	NaN	-1.13816	-0.165046	NaN	-0.453281	-0.594008	-0.249051	NaN	-0.358103	-0.0649929	-0.288769	-0.424978	0.225645	NaN	NaN	-0.277079	-0.169712	NaN	NaN	-0.057752		0.202664	-0.282966		0	-0.428961		0.191128	0.111881		0	NaN		0.960819	-0.173175		0.575936	-0.159282
SACM1L	Phosphatidylinositide phosphatase SAC1		5	10.3	0	9.0278	348740000	NaN	NaN	NaN	NaN	NaN	NaN	NaN	NaN	NaN	NaN	NaN	NaN	NaN	NaN	NaN	NaN	NaN	NaN	-0.247645	-0.144297	-0.325449	-0.264287	NaN	-0.344319		-4.34e-08	0		-4.34e-08	0		-4.34e-08	0		1.09413	-0.0916897		0	NaN		-4.34e-08	0
MSH2	DNA mismatch repair protein Msh2		10	17.5	0	11.638	2425000000	0.255682	NaN	2.98808	NaN	0.168	0.216362	NaN	1.35202	NaN	NaN	NaN	1.50899	0.194465	NaN	NaN	NaN	NaN	NaN	-0.0157825	-0.322794	NaN	-0.769649	-0.219287	0.129877		0	-2.77172		0	NaN		0	NaN		0.536687	0.603269		0.588703	2.16811		0	1.42742
THY1	Thy-1 membrane glycoprotein		3	25.5	0	13.966	832270000	NaN	-0.0305013	-0.290427	-0.253515	0.00432164	NaN	NaN	0.573181	NaN	NaN	NaN	NaN	NaN	NaN	NaN	NaN	NaN	NaN	NaN	-0.365946	-0.286656	-0.115801	NaN	-0.172815		0	0.034823		0	NaN		-4.34e-08	0		0	-0.0570144		0.274002	0.09567		0	NaN
UBXN1	UBX domain-containing protein 1		5	22.1	0	39.932	895210000	0.1145	0.53655	NaN	-0.0259847	-0.329323	NaN	NaN	NaN	NaN	NaN	NaN	NaN	0.0147838	-0.000404044	0.249991	NaN	NaN	NaN	-0.0229913	NaN	NaN	-0.290957	NaN	-0.19281		0.40055	-0.503179		-4.34e-08	0		0	NaN		0	0.0981465		0	0.616482		0.526044	0.237402
PRMT1	Protein arginine N-methyltransferase 1		7	26.2	0	17.615	5659000000	-0.35535	-0.287765	-0.240605	-0.174605	-0.404706	0.0200577	0.312897	-0.0759761	0.204892	-0.0971623	NaN	-0.0947107	NaN	-0.146132	-0.0516982	NaN	NaN	0.0176369	0.174151	-0.0573166	0.151729	0.170053	-0.223576	0.134747		0.350786	0.108156		1.00745	-0.354831		0	0.0693351		0.115666	-0.0597147	+	2.0548	-0.382729		1.41041	-0.195658
TSPAN18	Tetraspanin-18;Tetraspanin		3	17.4	0.0025694	2.09	592820000	NaN	NaN	NaN	NaN	NaN	NaN	NaN	-2.26819	-2.12004	-1.97171	NaN	-1.73125	NaN	NaN	NaN	NaN	NaN	NaN	NaN	NaN	NaN	NaN	NaN	NaN		-4.34e-08	0		0	0.388789		-4.34e-08	0		-4.34e-08	0		-4.34e-08	0		-4.34e-08	0
NPEPPS	Puromycin-sensitive aminopeptidase		44	56.7	0	289.22	64855000000	1.47348	1.39177	1.50259	1.49697	1.41781	1.3856	1.29989	1.18587	1.2969	1.44345	1.19786	1.27787	1.04362	0.977463	1.16073	1.10192	1.03815	1.26135	-1.69208	-1.61595	-1.62616	-1.58649	-1.57218	-1.7012		0.166743	-0.022482		0.339555	0.0455083		1.47607	0.0732035		0.331937	-0.0456208	+	6.98024	3.06548	+	2.48211	0.395338
VKORC1	Vitamin K epoxide reductase complex subunit 1	+	2	23.1	0	10.005	2194700000	0.662206	0.379288	0.67735	0.593688	NaN	0.641454	-0.454308	-0.550592	NaN	-0.574412	NaN	-0.52282	-0.620534	-0.876969	-0.611733	-0.655603	-0.616459	-0.552516	-0.158832	-0.0594799	-0.0285282	0.118094	-0.156659	-0.030914		0.714956	-0.052207		0	-0.120103		0.408871	0.0948863		1.88933	-0.125497	+	2.14271	0.562919	+	3.21595	1.27603
RNF141	RING finger protein 141	+	2	13.3	0	4.2085	158690000	-1.31255	-2.00764	NaN	NaN	NaN	NaN	NaN	NaN	NaN	NaN	NaN	NaN	NaN	NaN	NaN	NaN	NaN	NaN	NaN	NaN	NaN	NaN	NaN	NaN		0	NaN		-4.34e-08	0		-4.34e-08	0		-4.34e-08	0		0	NaN		0	NaN
CD151	Tetraspanin;CD151 antigen		7	20.7	0	26.703	17247000000	0.822363	0.765789	0.684819	1.00252	0.894449	0.991318	-0.127415	-0.215061	-0.0905725	-0.0805608	-0.0450295	-0.0155783	0.273218	0.418676	0.168385	0.422233	0.424922	0.470511	2.08763	1.87821	1.71132	1.76897	1.93697	1.88842		1.21897	0.205106		0.918262	0.0972933		0.665049	0.152462		1.51607	0.18484	+	4.07996	-1.02851	+	2.32563	0.470898
CD59	CD59 glycoprotein		4	29.6	0	14.236	6103300000	-0.242038	-0.328073	-0.477703	-0.284388	-0.270869	-0.172669	-0.971487	-0.829434	-0.455416	-0.591179	-0.91877	-0.835986	1.8718	2.26966	2.86641	2.49085	1.87145	2.18542	1.41175	0.884481	0.803227	0.812293	1.20289	1.33868		0.386821	0.106629		0.0432789	-0.0298661		0.133676	-0.153385	+	2.1209	0.48444	+	4.0593	-1.1826	+	3.08072	-2.68523
TUBGCP2	Gamma-tubulin complex component 2		7	15.3	0	8.0422	1079300000	NaN	NaN	NaN	NaN	NaN	NaN	NaN	NaN	NaN	NaN	NaN	NaN	NaN	NaN	NaN	NaN	NaN	NaN	NaN	-0.188381	-0.165208	-1.12727	1.80797	-1.00017		-4.34e-08	0		-4.34e-08	0		-4.34e-08	0		0.338141	1.05014		0	NaN		-4.34e-08	0
PDXK	Pyridoxal kinase		3	17.6	0	28.725	2099800000	-0.0359489	0.109695	-0.225042	-0.157078	0.0583859	0.481299	NaN	0.273337	0.352193	-0.0255735	NaN	NaN	0.224905	0.422556	0.333653	NaN	0.258459	NaN	0.495491	0.257614	0.236952	0.365357	0.222434	0.181421		0.243384	0.177968		0	NaN		0	-0.164097		0.0341422	0.0131407	+	1.49007	-0.337073	+	1.54624	-0.37747
CDCA3	Cell division cycle-associated protein 3	+	4	35.2	0	14.327	867130000	-0.639153	0.0496307	0.495695	NaN	NaN	NaN	-0.790235	-0.351866	-0.238732	NaN	NaN	NaN	NaN	-0.346225	NaN	NaN	NaN	NaN	NaN	-0.357456	NaN	NaN	NaN	NaN		0	NaN		0	NaN		0	NaN		0	NaN		0	0.32618		0	0.314949
DAD1	Dolichyl-diphosphooligosaccharide--protein glycosyltransferase subunit DAD1		3	37.6	0	24.441	2845600000	-0.0250742	-0.0430661	0.075738	0.0480967	0.184725	0.0999011	-0.230956	-0.215245	-0.103813	-0.118946	0.257011	0.0234682	-0.0341012	-0.389281	-0.584998	-0.313441	-0.100267	-0.23143	0.152508	0.136716	0.0969364	0.0717627	0.132906	NaN		0.658755	0.108375		0.741667	0.237182		0.215925	0.121081		0.625919	0.0258805		1.12431	-0.0992726		0.958487	0.33866
PRKAB1;PRKAB2	5-AMP-activated protein kinase subunit beta-1;5-AMP-activated protein kinase subunit beta-2	+	2	25	0	7.4062	520800000	-0.987102	NaN	-1.31671	NaN	NaN	NaN	-1.56149	-1.29474	NaN	NaN	NaN	NaN	NaN	NaN	NaN	NaN	NaN	NaN	NaN	-0.267722	NaN	-0.233736	NaN	NaN		0	NaN		0	NaN		-4.34e-08	0		0	NaN	+	1.49246	-0.901176		0	NaN
SEC23A	Protein transport protein Sec23A		4	9.4	0	17.849	947030000	NaN	NaN	0.205518	NaN	NaN	NaN	NaN	NaN	NaN	NaN	NaN	NaN	NaN	NaN	NaN	NaN	NaN	NaN	-0.307341	NaN	0.0054719	0.331247	0.087327	0.0112093		0	NaN		-4.34e-08	0		-4.34e-08	0		0.180845	-0.119091		0	0.0371584		0	NaN
NAP1L1	Nucleosome assembly protein 1-like 1		6	44.7	0	64.166	16493000000	-0.0663367	-0.0968691	-0.0512347	-0.10036	-0.135634	-0.149361	0.015212	0.0250288	0.144699	-0.0351357	0.139731	0.0475383	-0.00345221	-0.0165704	0.0538064	0.0127832	0.0291349	0.0694272	0.00532815	-0.0873348	0.0492126	0.172743	0.0661237	0.0382958		0.959166	-0.0569713		0.0552587	-0.0109353		0.916464	0.0258538		0.0397578	-0.00829122		0.694744	-0.116354		1.50458	-0.0827415
OTUB1	Ubiquitin thioesterase OTUB1		2	32.4	0	21.418	1550900000	-0.0673794	-0.267931	-0.300519	0.0882773	0.0874628	0.109695	0.0650208	-0.141876	-0.13649	0.00920381	-0.0583227	-0.0906646	0.0765591	-0.0245459	0.0237521	-0.352455	-0.148673	0.180657	-0.188447	-0.33388	-0.264686	-0.222953	-0.21215	0.0913952		1.23669	0.307088		0.210817	0.0245203		0.286738	-0.132079		0.807788	0.170772		0.317864	0.0618963		1.40747	-0.237198
MGST1	Microsomal glutathione S-transferase 1		3	33.8	0	11.791	1288900000	0.470199	NaN	NaN	NaN	NaN	NaN	NaN	NaN	NaN	NaN	NaN	NaN	NaN	-0.0276161	NaN	NaN	NaN	NaN	NaN	-0.386582	-0.588357	-0.101428	NaN	NaN		0	NaN		-4.34e-08	0		0	NaN		0	NaN		0	0.828987		0	0.497815
IQGAP2	Ras GTPase-activating-like protein IQGAP2		5	6	0.0020704	2.168	757840000	1.50172	NaN	NaN	1.41646	NaN	NaN	0.229834	NaN	NaN	NaN	NaN	NaN	NaN	NaN	NaN	NaN	NaN	NaN	NaN	-0.432163	0.160275	NaN	NaN	NaN		0	-0.0852579		0	NaN		-4.34e-08	0		0	NaN		0	1.63766		0	NaN
DDX19A;DDX19B	ATP-dependent RNA helicase DDX19B;ATP-dependent RNA helicase DDX19A		9	18.3	0	16.341	869100000	-0.102589	0.214125	0.00201835	0.457122	0.295723	0.322736	0.213876	NaN	NaN	NaN	0.247198	0.0829751	NaN	-0.13144	NaN	NaN	0.269153	0.157432	-0.237081	-0.323444	-0.224857	-0.43191	-0.211281	-0.399045		0.836256	0.320675		0	NaN		0	0.400593		0.747028	0.0442675	+	1.52115	0.364588		0	0.169291
GLOD4	Glyoxalase domain-containing protein 4		4	7.8	0	5.3628	689970000	NaN	NaN	NaN	-0.629612	NaN	-0.260169	NaN	NaN	NaN	NaN	NaN	-0.736317	NaN	NaN	-0.472549	NaN	NaN	NaN	NaN	NaN	NaN	-0.204566	-0.109203	NaN		0	NaN		0	NaN		0	NaN		0	NaN		0	NaN		0	NaN
MTCH1	Mitochondrial carrier homolog 1		3	8	0	5.4167	857570000	-0.491368	NaN	NaN	-0.640411	NaN	-1.26729	NaN	NaN	NaN	NaN	NaN	NaN	NaN	NaN	NaN	NaN	NaN	NaN	NaN	NaN	NaN	NaN	NaN	-1.29283		0	-0.149043		-4.34e-08	0		-4.34e-08	0		0	NaN		0	NaN		0	NaN
TNFRSF10A	Tumor necrosis factor receptor superfamily member 10A		9	37.1	0	42.866	9888600000	0.689478	1.1375	1.29596	1.24147	1.18434	1.47166	-0.547658	-0.492261	-0.485196	-0.377763	-0.413192	-0.553045	-0.448843	-0.641446	-0.561558	-0.444812	-0.758502	-0.577379	1.37729	1.42428	1.26987	1.35423	1.66193	1.38709		0.637212	0.258178		0.323009	0.0603715		0.431106	-0.0429485		0.347454	0.125978		0.758487	-0.308478	+	2.95429	1.5916
CAD	CAD protein;Glutamine-dependent carbamoyl-phosphate synthase;Aspartate carbamoyltransferase;Dihydroorotase		5	3.7	0	7.7808	531300000	-0.145047	NaN	-0.437194	NaN	-0.171645	0.0164963	NaN	NaN	NaN	NaN	NaN	NaN	NaN	NaN	NaN	NaN	NaN	NaN	NaN	-0.383661	NaN	NaN	NaN	NaN		0	0.45369		-4.34e-08	0		-4.34e-08	0		0	NaN		0	0.092541		0	NaN
CD63	Tetraspanin;CD63 antigen		5	15.8	0	23.416	30733000000	1.24823	1.16549	1.32935	1.24343	1.22842	1.25997	-0.439892	-0.405031	-0.355701	-0.423933	-0.397847	-0.367732	0.0931545	-0.0130139	0.0988237	0.154972	0.0797024	0.154972	1.80513	1.886	1.81914	1.77939	1.73171	1.73786		0.0312213	-0.00375632		0.156188	0.00370388		1.59869	0.0702273		1.40308	-0.0699449	+	3.29233	-0.580483	+	4.42543	1.18804
SLC38A1	Sodium-coupled neutral amino acid transporter 1		9	17.5	0	19.516	3285200000	1.24823	1.09228	1.48954	1.42159	1.00195	1.27202	0.1141	0.499068	0.208268	0.0160683	0.0762854	0.209266	0.625364	1.00985	0.574731	0.658097	0.55031	0.589476	0.645609	0.861558	0.875623	0.867501	0.695103	0.676448		0.134017	-0.0448309		0.51076	-0.173272		0.31527	-0.137354		2.54297	-0.195841	+	1.61656	0.408456	+	1.40209	0.540035
VPS29	Vacuolar protein sorting-associated protein 29		3	20.6	0	4.8444	378240000	0.3122	NaN	NaN	0.673195	0.415759	0.210015	NaN	-0.0794628	0.0855606	0.0501883	NaN	NaN	NaN	NaN	NaN	NaN	NaN	NaN	0.237074	-0.273674	-0.183327	0.105812	0.248049	NaN		0	0.360994		0	NaN		-4.34e-08	0		1.27158	0.471062		0	0.429263		0	NaN
CERS5;LASS5	Ceramide synthase 5		5	25.9	0	5.8553	367070000	NaN	NaN	NaN	NaN	NaN	NaN	NaN	NaN	NaN	NaN	NaN	NaN	NaN	NaN	NaN	NaN	NaN	NaN	-1.492	NaN	-1.31728	NaN	NaN	-1.61004		-4.34e-08	0		-4.34e-08	0		-4.34e-08	0		0	NaN		0	NaN		-4.34e-08	0
PRKAG1	5-AMP-activated protein kinase subunit gamma-1		4	24.3	0	30.377	2288100000	0.524766	0.0938305	NaN	NaN	NaN	NaN	0.0893625	NaN	NaN	NaN	NaN	NaN	NaN	NaN	NaN	NaN	NaN	NaN	-1.59196	-0.896657	-1.18725	-0.691802	-1.29453	-0.922429		0	NaN		0	NaN		-4.34e-08	0		0.711554	-0.344404	+	1.81994	1.23453		0	NaN
AK2	Adenylate kinase 2, mitochondrial;Adenylate kinase 2, mitochondrial;Adenylate kinase 2, mitochondrial, N-terminally processed		7	41.4	0	24.382	1806100000	0.0402613	0.186627	-0.100036	-0.104821	-0.162089	-0.137521	-0.593746	0.0777899	-0.0773455	NaN	NaN	NaN	0.0394191	NaN	-0.393179	-0.221321	-0.395682	-0.444596	0.0716254	-0.109219	0.0302654	-0.0283369	-0.270069	-0.0558013		0.717067	-0.177095		0	NaN		0.424754	-0.156078		0.119914	-0.0489848		0.352101	0.0780478		0.469141	0.219164
DCTN2	Dynactin subunit 2		4	22.5	0	19.772	969780000	NaN	NaN	NaN	NaN	NaN	NaN	NaN	NaN	NaN	NaN	NaN	NaN	NaN	NaN	1.08923	0.822771	NaN	NaN	NaN	-0.939427	-1.06169	-0.890626	0.336969	-1.35126		-4.34e-08	0		-4.34e-08	0		0	NaN		0.153328	0.469014		0	NaN		0	NaN
MYL6	Myosin light polypeptide 6		1	57.9	0	48.584	13245000000	0.120617	0.172616	0.0663992	0.0263043	0.146655	0.151209	0.37951	0.0947765	0.219091	0.268195	0.113967	0.164658	0.117695	0.234256	0.207893	0.196229	0.167743	0.0776532	0.225769	0.219587	0.115433	0.0985544	0.0798389	0.144699		0.0747634	-0.0118211		0.48788	-0.0488526		0.230018	-0.0394061		0.0782318	0.00557749		0.194182	-0.0246473		0.644714	-0.0667373
HNRNPA1;HNRNPA1L2	Heterogeneous nuclear ribonucleoprotein A1;Heterogeneous nuclear ribonucleoprotein A1, N-terminally processed;Heterogeneous nuclear ribonucleoprotein A1-like 2		11	45.3	0	70.719	6611800000	-0.248948	-0.37103	-0.435202	-0.532095	-0.532804	-0.526514	-1.16391	0.117296	-0.215932	-0.386242	-0.270504	-0.109437	-0.0876721	-0.313136	-0.337703	-0.219152	-0.277586	-0.287184	0.0813396	-0.0852671	-0.0239004	0.0180643	0.0626743	-0.0213358		1.06658	-0.178744		0.172198	0.165456		0.08644	-0.015137		0.447769	0.0712604	+	2.17293	-0.321359		0.474264	-0.105556
RPL10			1	54	0	16.845	2850000000	0.0533895	NaN	NaN	NaN	NaN	-0.0600062	NaN	0.146525	0.335826	-0.136109	-0.132973	0.141302	NaN	0.0395595	-0.0899121	-0.145733	0.170053	0.0648829	NaN	0.183963	0.290424	0.117562	0.172743	0.24817		0	NaN		0.947221	-0.237011		1.26682	0.142644		0.0146258	0.00646374		0	-0.143927		0	0.0785658
FAM162A	Protein FAM162A		6	34	0	45.36	4173500000	NaN	NaN	NaN	NaN	NaN	NaN	NaN	0.446997	0.257131	0.392317	NaN	0.378623	NaN	-0.203901	0.113967	0.385376	0.466966	-0.144776	-1.67535	-1.74067	-1.57708	-1.59018	-1.68562	-1.50631		-4.34e-08	0		0	0.121491		0.134101	0.206062		0.0728799	0.0135508		0	NaN		0	NaN
FANCI	Fanconi anemia group I protein		3	7.8	0	7.5761	307940000	NaN	0.625458	NaN	0.191184	NaN	NaN	NaN	NaN	NaN	0.716771	NaN	NaN	1.06392	NaN	NaN	NaN	NaN	NaN	NaN	-0.466835	NaN	0.668028	NaN	NaN		0	NaN		0	NaN		0	NaN		0	NaN		0	0.524861		0	-0.438459
SNX4			3	20.6	0.003998	1.8541	326810000	NaN	NaN	NaN	NaN	NaN	NaN	NaN	0.725697	NaN	NaN	NaN	NaN	NaN	NaN	NaN	NaN	NaN	NaN	-0.315648	NaN	NaN	-0.438229	-0.497425	-1.00289		-4.34e-08	0		0	NaN		-4.34e-08	0		0	-0.564659		0	NaN		-4.34e-08	0
TM4SF1	Transmembrane 4 L6 family member 1		1	8.9	0	14.331	73609000000	0.866789	0.898711	1.0165	1.09261	0.979367	1.426	-0.519445	-0.523546	-0.691966	-0.408072	-0.415749	-0.40947	0.493237	0.417272	0.494057	0.476537	0.471344	0.484808	2.12337	1.95021	2.12271	2.09754	2.12644	2.04611		0.889716	0.23866		0.995117	0.167222		0.144572	0.00937418		0.22251	0.041821	+	4.05242	-1.12949	+	3.03677	0.459143
ARPC4-TTLL3;ARPC4	Actin-related protein 2/3 complex subunit 4		2	32.6	0	16.331	3333300000	0.0192037	0.255199	-0.0683169	0.147958	0.11836	-0.171482	0.489132	0.0112093	0.0858326	0.0739573	0.0177795	0.165172	0.0439044	0.0600474	-0.0142373	-0.050099	0.0858326	-0.122868	0.434668	0.160146	0.207518	0.403813	0.0385766	0.252173		0.154686	-0.0370833		0.259392	-0.109755		0.522255	-0.0589498		0.0336934	-0.0153529		0.704532	-0.188464		0.145244	0.0387903
TMEM50B	Transmembrane protein 50B		2	12.6	0.0010707	2.5627	308300000	NaN	NaN	NaN	NaN	NaN	NaN	NaN	0.451963	0.77947	NaN	NaN	NaN	NaN	NaN	NaN	NaN	NaN	NaN	NaN	NaN	NaN	NaN	NaN	NaN		-4.34e-08	0		0	NaN		-4.34e-08	0		-4.34e-08	0		-4.34e-08	0		-4.34e-08	0
CPSF6	Cleavage and polyadenylation specificity factor subunit 6		3	11.3	0	22.096	1379100000	NaN	NaN	NaN	NaN	NaN	NaN	NaN	NaN	NaN	NaN	NaN	NaN	NaN	NaN	NaN	NaN	NaN	NaN	0.0703893	-0.196409	-0.0937097	0.38416	NaN	NaN		-4.34e-08	0		-4.34e-08	0		-4.34e-08	0		0	0.266798		0	NaN		-4.34e-08	0
DPP3	Dipeptidyl peptidase 3		3	6.2	0	5.3321	346650000	NaN	NaN	NaN	-0.332371	-0.442281	NaN	NaN	NaN	-0.426548	NaN	NaN	NaN	NaN	NaN	NaN	NaN	NaN	NaN	NaN	-0.128393	NaN	NaN	-0.328217	0.0150693		0	NaN		0	NaN		-4.34e-08	0		0	NaN		0	NaN		-4.34e-08	0
NUP160	Nuclear pore complex protein Nup160		4	4.3	0	8.3899	618300000	0.269991	NaN	NaN	NaN	NaN	NaN	NaN	NaN	NaN	NaN	NaN	NaN	NaN	NaN	NaN	NaN	NaN	NaN	-0.503446	NaN	NaN	-0.321207	0.232661	NaN		0	NaN		-4.34e-08	0		-4.34e-08	0		0	NaN		0	0.591198		0	NaN
API5	Apoptosis inhibitor 5		10	21.4	0	37.061	3427800000	0.209641	0.0780633	0.20364	0.281431	0.343806	-0.0544223	0.0776532	0.0590784	0.164915	0.088413	0.148479	0.1595	-0.0229326	0.0824301	-0.164609	-0.104341	-0.0965606	0.0360461	0.210763	0.301705	0.356595	0.157691	0.397255	0.316146		0.0563087	0.0264904		0.404932	0.0315817		0.0568894	-0.0199144		0.176318	0.0360581		0.670884	-0.108215		1.12056	0.198818
SLIRP	SRA stem-loop-interacting RNA-binding protein, mitochondrial		3	28.2	0	4.1231	470090000	-0.613189	-0.604279	-0.802235	-0.661228	NaN	NaN	-0.959094	NaN	NaN	NaN	-0.71215	NaN	-0.682858	-0.529406	NaN	NaN	NaN	NaN	NaN	NaN	NaN	NaN	NaN	NaN		0	-0.0480385		0	NaN		0	NaN		-4.34e-08	0		0	NaN		0.256325	-0.0671025
CDK2	Cyclin-dependent kinase 2		8	35	0	28.633	2285000000	1.20883	NaN	0.726395	NaN	1.13133	NaN	NaN	0.683831	NaN	0.526069	NaN	0.511164	NaN	NaN	0.704252	NaN	0.784755	0.616922	-0.639782	-0.776923	-0.435163	-0.706771	-0.673739	-0.613741		0	NaN		0	NaN		0	-0.08733		0.0073153	-0.00280128	+	2.25048	1.60723		0	0.26336
PSMA6	Proteasome subunit alpha type;Proteasome subunit alpha type-6		11	51.6	0	39.876	5702000000	-0.0336286	0.064469	0.00848693	-0.060939	0.00891703	-0.00251244	0.0560286	-0.216451	0.165044	0.263035	0.237319	0.209391	0.0330882	0.116764	-0.00724608	-0.0218337	0.0504668	-0.297484	-0.667149	-0.680729	-0.687079	-0.710142	-0.719495	-0.767929		0.859901	-0.0312872		0.728223	0.235041		0.666936	-0.137152		0.461009	-0.0255408	+	4.72565	0.705759		0.302599	-0.0344263
TRAM1	Translocating chain-associated membrane protein 1		7	25	0	75.502	14209000000	3.70377	2.49557	1.4443	2.78722	3.14664	2.09116	1.85248	1.6063	1.31719	1.46707	1.07286	1.73196	1.22916	1.51808	1.16813	1.57202	1.05102	1.27501	-1.33261	-1.39908	-1.27456	-1.31775	-1.28613	-1.3965		0.0807993	0.127131		0.203505	-0.168023		0.00743429	-0.00577327		0.0618336	-0.00794538	+	2.39277	3.87834	+	0.874376	1.24275
TMPO	Lamina-associated polypeptide 2, isoforms beta/gamma;Thymopoietin;Thymopentin		3	27.8	0	7.1041	673240000	NaN	NaN	NaN	NaN	0.699018	1.12426	NaN	-0.259979	0.352307	NaN	NaN	NaN	NaN	0.0305479	NaN	NaN	NaN	NaN	NaN	NaN	NaN	-0.176169	NaN	NaN		0	NaN		0	NaN		0	NaN		0	NaN		0	NaN		0	NaN
MRPS27	28S ribosomal protein S27, mitochondrial		4	17.3	0	6.4137	862950000	NaN	NaN	0.0321009	NaN	NaN	0.630499	NaN	-0.387298	NaN	NaN	NaN	0.738033	NaN	NaN	0.0289935	NaN	0.919912	NaN	0.538637	0.371057	NaN	0.607863	NaN	0.199248		0	0.598398		0	NaN		0	NaN		0.126231	-0.120517		0	-0.457359		0	0.00310744
SEC24C	Protein transport protein Sec24C		3	4.2	0	8.5319	538640000	-0.275524	NaN	-0.174687	NaN	NaN	NaN	NaN	NaN	NaN	NaN	NaN	NaN	NaN	NaN	NaN	NaN	NaN	NaN	-1.17352	NaN	-0.970356	-0.719685	-0.70329	NaN		0	NaN		-4.34e-08	0		-4.34e-08	0		0	0.267066	+	1.35304	0.619915		0	NaN
DNM1L	Dynamin-1-like protein		19	38.6	0	127.45	6354900000	0.338567	0.102053	0.415218	0.353549	0.383386	0.448161	0.684819	0.489235	0.530171	0.524666	0.484293	0.417596	0.200253	0.361319	0.369271	0.359746	0.251568	0.279174	-0.548375	-0.435924	-0.53026	-0.551818	-0.377388	-0.649367		0.481723	0.109753		0.741512	-0.0925565		0.0501751	-0.0134519		0.0729242	-0.0190426	+	2.84786	0.79128		0.080889	-0.0250017
IMPDH2	Inosine-5-monophosphate dehydrogenase 2		18	47.7	0	172.61	18075000000	-0.25214	-0.250234	-0.323823	-0.244446	-0.152276	-0.286075	-0.237439	-0.106265	-0.144026	-0.2257	-0.246378	-0.272384	-0.394335	0.0698396	0.00432164	-0.270591	-0.0997418	-0.222145	-0.0883314	-0.156418	-0.0610594	-0.0228007	-0.0698001	-0.0438392		0.670682	0.0478		0.654753	-0.0855776		0.30902	-0.0907678		0.159923	0.0127691	+	1.86256	-0.195306		0.501263	-0.168674
ERGIC3	Endoplasmic reticulum-Golgi intermediate compartment protein 3		6	17.8	0	11.782	1192400000	0.460166	0.618615	0.897473	0.819832	0.984043	1.26027	-0.0146161	0.00934718	0.124328	0.195221	-1.1192	NaN	0.734655	1.15374	NaN	NaN	1.14633	NaN	NaN	0.240009	0.333195	0.527471	0.338339	0.678252	+	4.6759	0.362629		0.209691	-0.459353		0	-0.00741112		0.32031	0.0779628		0.887016	0.29186		0.52588	-0.285447
TRIM16	Tripartite motif-containing protein 16		6	8.8	0	13.56	933270000	NaN	NaN	NaN	NaN	0.475293	NaN	NaN	-0.351369	NaN	NaN	NaN	NaN	0.410558	NaN	-2.13144	NaN	NaN	NaN	0.697151	NaN	-0.175289	0.0959919	-0.232108	-0.329323		0	NaN		0	NaN		0	NaN		0.381478	-0.241067		0	NaN		0	NaN
NCSTN	Nicastrin		4	20	0	10.378	948520000	NaN	-1.93534	NaN	0.570463	NaN	NaN	NaN	-0.199703	NaN	-0.405604	NaN	-0.718569	-0.499851	NaN	NaN	0.1149	-0.259703	NaN	NaN	NaN	NaN	0.578021	NaN	NaN		0	NaN		0	NaN		0	0.614751		0	NaN		0	-2.51336		0	-1.43549
MCM2	DNA replication licensing factor MCM2		12	17.2	0	24.188	3488000000	0.144177	0.475396	-0.0493076	-0.246378	-0.0356679	-0.113988	-0.0243698	0.233643	1.18479	0.485015	-0.206295	-0.447131	0.188528	NaN	0.143655	NaN	0.187894	-0.0184396	-0.0427837	0.112767	-0.152789	0.0129261	-0.0239004	-0.14535		0.863296	-0.3221		0.310712	-0.520824		0	-0.162094		0.233633	-0.0616461		0.507828	0.19912		0.0402859	0.0239975
CD44	CD44 antigen		9	42.2	0	56.457	41389000000	1.32337	1.20902	1.27471	1.27358	1.29901	1.35298	-0.256408	-0.163478	-0.137362	-0.315612	-0.342964	-0.319838	0.304861	0.268794	0.256407	0.275245	0.306496	0.259303	1.78509	1.71207	1.73985	1.69359	1.63872	1.68997		0.327181	0.0394915		1.12829	-0.140389		0.0614838	0.00366061		0.0689285	-0.0105734	+	3.62467	-0.446136	+	4.97845	0.992345
PPP5C	Serine/threonine-protein phosphatase;Serine/threonine-protein phosphatase 5		3	5.6	0	4.0579	199330000	NaN	NaN	NaN	-0.269982	NaN	-0.286427	NaN	-0.112459	NaN	NaN	NaN	NaN	NaN	NaN	NaN	NaN	NaN	NaN	NaN	NaN	NaN	NaN	NaN	NaN		0	NaN		0	NaN		-4.34e-08	0		-4.34e-08	0		-4.34e-08	0		-4.34e-08	0
TEAD1;TEAD3;TEAD4;TEAD2	Transcriptional enhancer factor TEF-1;Transcriptional enhancer factor TEF-5;Transcriptional enhancer factor TEF-3;Transcriptional enhancer factor TEF-4		3	7.3	0.010038	1.5195	195160000	NaN	NaN	NaN	NaN	NaN	NaN	NaN	NaN	NaN	NaN	NaN	NaN	NaN	NaN	NaN	NaN	NaN	NaN	-0.999048	NaN	-0.666828	NaN	-0.848505	NaN		-4.34e-08	0		-4.34e-08	0		-4.34e-08	0		0	-0.181677		0	NaN		-4.34e-08	0
FERMT2	Fermitin family homolog 2		14	37.2	0	43.246	4359900000	-0.347894	-0.106716	-0.140142	0.00475299	-0.00228126	0.248535	0.0905825	0.0990932	0.0230425	-0.00132789	0.433066	-0.107368	0.274888	0.396707	-0.209128	NaN	0.0880058	0.0432046	-0.193222	-0.107042	-0.338469	-0.238528	-0.276205	-0.0858182		1.05814	0.281919		0.0831062	0.0372174		0.028608	-0.0281846		0.22157	0.0429308		0.106399	0.0297623		0.816597	-0.352406
TSPAN3	Tetraspanin-3		4	33.5	0	23.514	6454500000	1.76197	1.76634	1.89317	NaN	1.65737	1.46639	-0.407268	0.0531114	-0.272158	-0.049039	-0.108301	0.00877379	0.916629	1.1714	1.05915	1.08032	0.880176	0.908582	2.2322	NaN	NaN	2.18212	2.04789	2.04121		0.467445	-0.267875		0.367597	0.159249		0.250398	-0.0927003		0	-0.140912		0	-0.374962	+	3.05168	0.7581
IDH3A	Isocitrate dehydrogenase [NAD] subunit alpha, mitochondrial		7	27.2	0	17.658	2053700000	-0.544898	-0.321928	-0.449316	-0.0771932	-0.507973	-0.0278073	-0.288382	-0.168658	-0.0429918	NaN	NaN	NaN	0.142087	-0.48459	-0.0729228	-0.195632	-0.528677	0.107554	0.147437	0.263275	0.571531	0.283092	0.415218	0.390228		0.418353	0.23439		0	NaN		0.155874	-0.0671098		0.243327	-0.0550052	+	2.62019	-0.811347		0.702838	-0.300238
SEC11A	Signal peptidase complex catalytic subunit SEC11;Signal peptidase complex catalytic subunit SEC11A;Signal peptidase I		4	17.8	0	7.9204	511070000	NaN	NaN	NaN	1.61363	NaN	NaN	NaN	NaN	NaN	NaN	NaN	NaN	NaN	NaN	NaN	NaN	NaN	NaN	-1.1421	-1.10917	NaN	NaN	NaN	-1.04157		0	NaN		-4.34e-08	0		-4.34e-08	0		0	-0.0329266		0	NaN		-4.34e-08	0
DDX17	Probable ATP-dependent RNA helicase DDX17		8	19.3	0	10.326	809900000	-0.0559812	-0.286023	NaN	-0.276695	NaN	NaN	-0.156482	NaN	-0.311345	-0.194427	NaN	NaN	NaN	0.303927	NaN	-0.515212	NaN	NaN	-0.0975636	0.0450235	0.468948	0.421372	0.129217	-0.178241		0	-0.220714		0	-0.0379444		0	NaN		0.949191	-0.360643	+	1.05669	-0.482783		0	-0.474929
RAB11A;RAB11B	Ras-related protein Rab-11A;Ras-related protein Rab-11B		8	57.4	0	21.935	2440700000	NaN	NaN	2.22438	1.98819	2.34679	1.73552	1.59134	0.858856	2.33437	1.95476	1.76477	1.20495	1.54962	NaN	1.03682	1.10131	1.27775	1.09511	-1.20979	-1.33341	-1.64467	-1.50373	-1.28356	-1.57205		0	-0.488858		0.0241608	0.0466371		0.234839	-0.195006		0.420238	0.1388		0	3.71832		0	0.93116
IST1	IST1 homolog		4	27.7	0	6.6985	485700000	NaN	NaN	0.992623	NaN	1.02807	1.08848	NaN	0.547055	NaN	0.50284	NaN	NaN	NaN	NaN	NaN	NaN	NaN	NaN	0.350271	NaN	NaN	NaN	NaN	0.835197		0	0.0958574		0	NaN		-4.34e-08	0		0	NaN		0	NaN		0	NaN
ARL6IP1	ADP-ribosylation factor-like protein 6-interacting protein 1		4	35	0	17.469	4470000000	1.00094	NaN	0.288063	NaN	NaN	NaN	0.449112	NaN	0.818196	1.02822	0.836651	0.96303	0.546561	0.540821	0.230695	NaN	0.831229	NaN	-0.811852	-1.16049	-1.21813	-1.3018	-0.863494	-0.921117		0	NaN		0.463465	0.361969		0	0.290408	+	3.13069	0.361319	+	2.20637	1.87131		0.267204	0.205141
PDXDC1	Pyridoxal-dependent decarboxylase domain-containing protein 1		10	17.2	0	30.365	1381500000	NaN	NaN	NaN	0.0773797	0.0461418	0.0329472	NaN	NaN	NaN	NaN	NaN	NaN	NaN	-0.206512	NaN	NaN	NaN	NaN	-1.03413	-0.627895	-0.67542	-0.639355	-0.924372	-1.32619		0	NaN		-4.34e-08	0		0	NaN		1.13616	-0.447341		0	NaN		0	NaN
FUS;TAF15	RNA-binding protein FUS;TATA-binding protein-associated factor 2N		3	8.9	0	6.4286	492870000	-0.37415	-0.618783	-0.139856	NaN	-0.0453272	-0.295447	NaN	NaN	NaN	NaN	NaN	0.662752	NaN	NaN	NaN	-0.0905418	NaN	NaN	-0.450735	NaN	-0.211799	NaN	NaN	-0.344886		0.174789	0.208932		0	NaN		0	NaN		0	NaN		0	-0.165797		0	NaN
NDUFB10	NADH dehydrogenase [ubiquinone] 1 beta subcomplex subunit 10		4	28.6	0	12.968	623260000	-0.0582326	0.32964	NaN	NaN	NaN	NaN	NaN	NaN	NaN	NaN	NaN	NaN	0.189793	NaN	NaN	NaN	NaN	NaN	-0.224823	-0.274041	-0.318128	-0.444164	-0.207061	NaN		0	NaN		-4.34e-08	0		0	NaN		0.629958	0.0801422	+	1.2492	0.481148		0	-0.0540891
C16orf58	RUS1 family protein C16orf58		5	18.4	0	17.368	1114800000	NaN	NaN	NaN	NaN	NaN	NaN	NaN	NaN	NaN	NaN	NaN	NaN	NaN	NaN	NaN	NaN	NaN	NaN	-1.81543	-1.77374	-2.24872	-1.78329	-1.5277	-1.84622		-4.34e-08	0		-4.34e-08	0		-4.34e-08	0		0.293192	0.205469		0	NaN		-4.34e-08	0
ECI1;DCI	Enoyl-CoA delta isomerase 1, mitochondrial		3	17.9	0	7.2559	2195900000	NaN	NaN	0.86584	1.046	-0.607881	NaN	NaN	0.819178	-0.315666	NaN	NaN	NaN	NaN	0.421048	0.437547	0.89173	NaN	-0.442889	NaN	-0.287202	NaN	NaN	NaN	-0.384659		0	NaN		0	NaN		0	-0.880436		0	NaN		0	1.15304		0	0.436542
CSNK2A2;CSNK2A1;CSNK2A3	Casein kinase II subunit alpha;Casein kinase II subunit alpha 3;Casein kinase II subunit alpha		1	10.9	0	4.6357	278040000	NaN	NaN	NaN	NaN	NaN	NaN	NaN	NaN	NaN	NaN	NaN	NaN	NaN	NaN	NaN	NaN	NaN	NaN	NaN	-0.904359	-0.900772	NaN	NaN	NaN		-4.34e-08	0		-4.34e-08	0		-4.34e-08	0		0	NaN		0	NaN		-4.34e-08	0
LRRC57	Leucine-rich repeat-containing protein 57	+	7	51.4	0	21.794	5017500000	-0.888835	-0.945471	-0.934373	1.84065	2.17817	1.76133	-0.585843	-0.769256	-0.861762	1.96957	1.78814	1.80595	0.852798	0.404685	0.658737	2.33785	3.01137	3.24945	NaN	0.50457	0.625645	0.474254	1.52777	3.14467	+	2.63533	2.84961	+	3.68896	2.59351	+	1.57396	2.22748		0.533728	1.78627	+	5.10544	-1.45772	+	3.54852	-1.56163
NOL3	Nucleolar protein 3	+	8	70.7	0	106.62	13575000000	-1.25753	-1.40019	-1.28704	1.54641	1.1606	1.3658	-1.51083	-1.24968	-1.38987	0.857901	0.316609	0.782241	-0.238272	-0.380859	-0.167523	2.02917	1.82619	2.20627	2.17884	-0.441713	-0.341373	-0.641896	1.9271	2.117	+	3.15326	2.67252	+	1.86074	2.03571	+	3.34146	2.28276	+	2.48635	2.54931	+	2.98463	-0.839926	+	3.79536	-1.0527
MSLN	Mesothelin;Megakaryocyte-potentiating factor;Mesothelin, cleaved form		5	21.6	0	8.292	3915600000	NaN	0.324811	0.730923	1.50975	0.329181	NaN	-0.12863	-0.218346	NaN	0.269871	NaN	-0.526951	1.21375	NaN	NaN	NaN	NaN	NaN	NaN	1.37624	NaN	0.0694272	0.654527	NaN		0	0.0043703		0	0.398501		0	NaN		0	NaN		0.0955627	-0.194964		0	-0.685885
DHX30	Putative ATP-dependent RNA helicase DHX30		3	3.4	0	8.332	1409000000	NaN	NaN	2.15523	1.76986	NaN	NaN	NaN	NaN	NaN	NaN	NaN	NaN	NaN	NaN	NaN	NaN	1.83762	NaN	4.80627	NaN	2.73474	NaN	NaN	2.87988		0	NaN		-4.34e-08	0		0	NaN		0	NaN		0	-0.579511		0	NaN
RETSAT	All-trans-retinol 13,14-reductase		3	13.4	0	17.692	453780000	NaN	NaN	NaN	NaN	NaN	NaN	NaN	NaN	NaN	NaN	NaN	NaN	NaN	NaN	NaN	NaN	NaN	-0.104279	-0.965362	-0.950536	-0.814818	-1.08357	-1.55211	NaN		-4.34e-08	0		-4.34e-08	0		0	NaN		0.312292	-0.37606		0	NaN		-4.34e-08	0
TRIM4	E3 ubiquitin-protein ligase TRIM4		1	5.4	0.0040241	1.8947	6224100000	0.365804	0.387583	0.259423	0.401084	0.389787	0.474047	0.43189	-0.576906	0.162339	0.0761487	0.542208	0.515107	NaN	0.260748	0.288418	NaN	0.217355	0.223299	-0.21734	-0.440244	-0.381461	-0.326679	-0.25577	-0.395758		0.480393	0.0840357		0.323815	0.372047		0.900338	-0.054256		0.407645	0.0931718	+	3.82262	0.720398		0.503915	0.0630206
ALG3	Dol-P-Man:Man(5)GlcNAc(2)-PP-Dol alpha-1,3-mannosyltransferase		2	6.8	0	20.943	1457900000	NaN	NaN	NaN	NaN	1.51	0.67084	1.00533	NaN	NaN	NaN	NaN	NaN	NaN	NaN	NaN	NaN	NaN	NaN	-0.00747806	0.130931	-0.65136	-0.575551	-0.243216	-0.407058		0	NaN		0	NaN		-4.34e-08	0		0.343679	0.146076		0	NaN		-4.34e-08	0
BET1;DKFZp781C0425	BET1 homolog		3	26.3	0	23.775	814220000	0.605779	0.554442	0.343919	0.536053	0.426748	NaN	NaN	0.161436	-0.091141	0.067914	NaN	0.364348	0.869161	1.32435	NaN	NaN	NaN	0.755486	0.80892	NaN	NaN	NaN	NaN	1.26742		0.740361	-0.0987098		0	0.455489		0	NaN		0	NaN		0	NaN	+	1.23789	-0.595375
APOO	Apolipoprotein O		3	28.1	0	4.5994	342420000	NaN	NaN	NaN	NaN	NaN	NaN	NaN	NaN	NaN	NaN	NaN	NaN	NaN	NaN	NaN	NaN	NaN	NaN	NaN	-1.25401	-1.38703	NaN	-1.3474	-1.45581		-4.34e-08	0		-4.34e-08	0		-4.34e-08	0		0	0.0396354		0	NaN		-4.34e-08	0
NSF	Vesicle-fusing ATPase		8	12.9	0	6.0032	549040000	NaN	NaN	NaN	-0.743279	NaN	NaN	NaN	NaN	NaN	NaN	NaN	NaN	NaN	NaN	NaN	NaN	NaN	NaN	-0.768223	-0.538408	-0.35703	0.698663	-0.904656	NaN		0	NaN		-4.34e-08	0		-4.34e-08	0		0.607219	-0.38872		0	NaN		-4.34e-08	0
SLC25A11	Mitochondrial 2-oxoglutarate/malate carrier protein		13	52.4	0	66.495	8087000000	1.03309	0.884402	1.01142	0.970265	1.0418	1.17702	0.482745	0.614003	0.203514	0.392977	0.0129261	0.466758	0.237931	0.269033	0.243181	0.205142	0.167615	0.53067	-1.40156	-1.39017	-1.23219	-1.46387	-1.29757	-1.33708		0.436456	0.0867262		0.202561	-0.142534		0.147905	0.0510939		0.0978793	0.0166715	+	5.03346	2.33838	+	3.97675	0.726256
KIAA0368;ECM29	Proteasome-associated protein ECM29 homolog		11	6.5	0	23.454	2188800000	0.77011	0.73907	0.792522	0.689389	0.98448	0.99458	0.419215	0.642378	NaN	0.277271	NaN	0.409472	0.20364	0.317536	0.235359	NaN	NaN	1.01771	-0.224874	0.0441843	0.0612924	-0.0482929	0.0903115	0.487692		0.450501	0.122248		0	-0.141945		0	0.782349		0.145434	0.0986487	+	4.43361	0.748173	+	3.79709	0.515056
CYB5B	Cytochrome b5 type B		6	63.3	0	88.297	13626000000	1.90497	1.79685	2.02009	1.66598	1.86283	1.68266	0.167743	-0.0260288	-0.205064	-0.300182	0.0482362	0.0176369	-0.139538	-0.485822	-0.446777	-0.114551	-0.263837	-0.11076	-1.38964	-1.44069	-1.22678	-1.29789	-1.25981	-1.33785		0.528427	-0.170143		0.090733	-0.0569863		0.780367	0.19433		0.0830261	-0.00730976	+	5.44231	3.22909	+	4.23484	2.26468
PARVA	Alpha-parvin		4	13.8	0	8.0989	864110000	NaN	NaN	NaN	0.311736	NaN	NaN	NaN	NaN	NaN	NaN	NaN	NaN	NaN	NaN	NaN	NaN	NaN	NaN	-0.108752	NaN	-0.248776	-0.250938	NaN	-0.150353		0	NaN		-4.34e-08	0		-4.34e-08	0		0	0.100585		0	NaN		-4.34e-08	0
SRSF2	Serine/arginine-rich splicing factor 2		6	51.5	0	31.543	2569400000	-0.19342	-0.343916	-0.249376	-0.130002	0.0724488	-0.103193	NaN	NaN	NaN	NaN	NaN	0.847676	NaN	0.979074	0.788017	0.794354	0.896775	0.708849	1.00411	1.44292	NaN	0.777283	0.566377	0.691891		0.722743	0.208655		0	NaN		1.90862	-0.0807333		0.422917	-0.262101	+	1.90334	-1.37234	+	2.96622	-1.14578
PHB2	Prohibitin-2		11	44.6	0	28.406	2584200000	NaN	NaN	1.01885	0.566279	1.06095	NaN	NaN	NaN	NaN	NaN	-0.0753832	-0.463052	-0.831563	-1.07206	-1.23304	NaN	-1.39547	NaN	-1.56747	-2.01351	-1.33054	-1.92035	-2.04246	-1.89701		0	NaN		0	NaN		0	-0.323415		0.0791526	-0.080844		0	2.77365		0	2.0644
OLA1	Obg-like ATPase 1		9	24	0	34.522	3651400000	0.0319598	0.0844725	0.491494	0.0695647	0.0326651	0.253747	0.187261	0.298189	0.104873	-0.238442	NaN	0.226509	0.31371	0.689389	0.176067	NaN	NaN	0.159371	-0.63619	-0.366932	-0.544751	-0.693061	-0.539603	-0.555736		0.388062	-0.0839831		0.169297	-0.152034		0	-0.0166966		0.120413	-0.0422619	+	1.88426	0.737556		0.378478	-0.190413
RPL36A;RPL36A-HNRNPH2	60S ribosomal protein L36a		3	43.7	0	8.2019	2978200000	NaN	-0.0237243	NaN	-0.0083485	NaN	-0.600009	0.140779	NaN	NaN	NaN	0.171207	0.0149266	-0.00103915	NaN	NaN	NaN	NaN	0.186881	NaN	NaN	NaN	NaN	NaN	NaN		0	NaN		0	NaN		0	NaN		-4.34e-08	0		0	NaN		0	-0.0226852
IARS	Isoleucine--tRNA ligase, cytoplasmic		10	9.4	0	10.657	1842100000	0.397803	-0.885713	NaN	NaN	0.703544	0.477367	0.444243	0.333195	-2.52541	0.694747	0.492315	-1.15927	NaN	0.164014	NaN	NaN	-0.0380952	NaN	0.32239	-0.059916	0.0768327	NaN	-0.195252	NaN		0	1.58926		0.574072	0.591923		0	-0.202109		0.0487743	0.0551102		0.134627	-0.252413		0	-0.407969
TBCD	Tubulin-specific chaperone D		7	10.1	0	9.0123	6083800000	0.21014	0.75232	NaN	NaN	NaN	NaN	NaN	NaN	-0.0566262	NaN	NaN	NaN	NaN	NaN	NaN	NaN	-0.628519	0.576377	-0.425734	NaN	-0.0277632	-0.0762955	-0.510868	NaN		0	NaN		0	NaN		0	NaN		0	-0.483105		0.723164	0.533259		0	NaN
ZNF207	BUB3-interacting and GLEBS motif-containing protein ZNF207		2	7.3	0	5.4095	268480000	NaN	NaN	-0.300519	-0.341299	0.295018	NaN	NaN	NaN	0.182438	NaN	NaN	NaN	NaN	NaN	NaN	NaN	NaN	NaN	NaN	0.317883	-0.0509806	NaN	-0.073788	-0.15674		0	NaN		0	NaN		-4.34e-08	0		0	-0.0228074		0	-0.433971		0	NaN
DDX5	Probable ATP-dependent RNA helicase DDX5		8	20.4	0	26.79	4085800000	0.175045	0.222186	0.163885	0.0840642	0.0709388	0.158208	0.476226	0.457122	0.731009	0.867501	0.736908	0.320543	0.41511	0.529271	0.477781	0.472592	0.345056	0.362666	0.404031	0.319849	0.121679	0.395831	0.369829	0.381173		0.722375	-0.0826353		0.118006	0.0868648		0.421826	-0.0806161		0.521195	0.105892		0.477847	-0.0920805	+	2.80375	-0.287015
RPL19	Ribosomal protein L19;60S ribosomal protein L19		10	28.5	0	52.632	34188000000	-0.0357271	-0.120137	-0.0694973	-0.15563	-0.096283	-0.211548	0.0209111	0.0124972	0.0936954	0.102322	-0.0109482	0.1145	-0.0300299	-0.0337172	-0.0859713	-0.0358011	-0.0652797	-0.00699962	0.198997	0.188654	0.240986	0.241718	0.295135	0.307778		0.574287	-0.0793665		0.319953	0.0262569		0.143889	0.0138794		0.906676	0.0435174	+	3.23459	-0.298907		0.342605	-0.0252144
ARHGDIA	Rho GDP-dissociation inhibitor 1		8	68	0	43.627	4765000000	NaN	0.0521377	NaN	0.0880058	0.139993	NaN	-0.318722	0.0965318	0.41997	0.00877379	-0.0153887	NaN	0.188781	NaN	-0.114832	0.115166	-0.0425311	0.182438	-0.520769	-0.525953	-0.594814	-0.492972	-0.595032	-0.678441		0	0.0878556		0.148961	0.107787		0.184064	0.111828		0.358201	-0.0601679		0	0.59005		0	0.0151632
RPL26;RPL26L1	60S ribosomal protein L26;60S ribosomal protein L26-like 1		4	34	0	7.09	350770000	NaN	NaN	0.583519	-0.151554	0.185613	-0.135396	NaN	0.312665	0.232906	0.262072	NaN	NaN	NaN	0.114234	-1.08	0.351855	NaN	0.270469	0.443819	NaN	NaN	NaN	NaN	NaN		0	-0.718915		0	NaN		0	1.35047		0	NaN		0	NaN		0	1.0664
SRSF1	Serine/arginine-rich splicing factor 1		4	14.2	0	3.7283	237380000	NaN	NaN	-0.0127374	NaN	0.169284	NaN	NaN	NaN	NaN	NaN	NaN	NaN	NaN	NaN	NaN	NaN	NaN	NaN	0.482229	NaN	NaN	NaN	0.271187	NaN		0	NaN		-4.34e-08	0		-4.34e-08	0		0	NaN		0	NaN		0	NaN
CDK5RAP3	CDK5 regulatory subunit-associated protein 3		3	17.9	0.00055679	3.0802	171590000	NaN	NaN	NaN	NaN	NaN	NaN	NaN	NaN	NaN	NaN	NaN	NaN	NaN	NaN	NaN	NaN	NaN	NaN	0.887759	NaN	NaN	NaN	0.384713	0.962956		-4.34e-08	0		-4.34e-08	0		-4.34e-08	0		0	NaN		-4.34e-08	0		-4.34e-08	0
CDKN2A	Cyclin-dependent kinase inhibitor 2A		2	45.7	0	17.563	1811300000	NaN	NaN	NaN	NaN	-0.0089435	-0.119181	NaN	0.0311129	0.204266	-0.169453	-0.299969	NaN	0.0533895	NaN	NaN	NaN	NaN	NaN	-0.0531045	NaN	NaN	NaN	0.017922	NaN		0	NaN		0	-0.331082		0	NaN		0	NaN		-4.34e-08	0		0	NaN
MYL12A;MYL12B	Myosin regulatory light chain 12A;Myosin regulatory light chain 12B		2	49.2	0	79.982	46640000000	0.123534	0.154972	0.15782	0.0060466	0.172872	0.066537	0.252537	0.193835	0.256648	0.310573	0.183582	0.313594	0.278223	0.186881	0.257976	0.112366	0.275245	0.267715	0.128689	0.209141	0.277033	0.135798	0.176451	0.233275		0.577373	-0.0636235		0.581387	0.0349096		0.101203	-0.022584		0.154071	-0.0278524		0.664071	-0.0618819		1.48612	-0.0955846
YES1	Non-specific protein-tyrosine kinase;Tyrosine-protein kinase Yes	+	3	10.9	0	12.024	807410000	-0.992173	NaN	-1.02189	1.48047	NaN	NaN	NaN	-0.0722248	NaN	NaN	NaN	NaN	NaN	NaN	0.582941	NaN	NaN	NaN	NaN	-0.0124754	0.589284	NaN	0.89243	NaN		0	2.47264		0	NaN		0	NaN		0	0.303146	+	1.30058	-1.29544		0	-1.58997
TMCO1	Transmembrane and coiled-coil domain-containing protein 1		4	19.2	0	21.02	1815100000	0.533464	0.704695	0.778797	0.851359	0.606063	0.757365	0.306146	0.464982	0.350837	0.267116	0.377734	0.280481	0.196481	0.1133	0.455755	0.452385	0.16543	0.155749	0.337882	NaN	0.174023	0.330673	0.203264	NaN		0.182069	0.0659437		1.36209	-0.065544		0.00508997	0.00267572		0	0.0292408	+	1.49524	0.419971	+	1.52664	0.41714
LONP1	Lon protease homolog, mitochondrial		10	17.4	0	16.568	2609400000	0.33674	0.404685	0.166972	0.453017	0.386811	-0.0125918	-0.0782743	-0.0796915	-0.486489	-1.42496	-0.137934	NaN	-0.326281	-0.368961	-0.187707	0.064469	-0.11491	-0.156241	0.372841	0.286053	0.206893	0.297954	0.437973	0.365692		0.106951	-0.0270539		0.325613	-0.702463		0.78468	0.225422		0.885264	0.128535		0.19753	0.0391657	+	2.58322	0.597116
PSMD8			1	39.4	0	18.758	2100800000	NaN	-0.200366	NaN	0.052555	-0.0133051	-0.231481	0.0209111	0.161307	-0.193519	-0.257494	-0.213454	0.695638	-0.384188	-0.101846	-0.160508	-0.0940638	NaN	-0.154522	-0.557433	-0.518081	-0.123528	-0.193222	-0.304487	-0.166389		0	0.18706		0.0633206	0.0786637		0.31259	0.148055		0.394653	-0.0644927		0	0.0779116		0	0.0151484
H3F3B;HIST2H3A;HIST3H3;H3F3A;HIST1H3A;H3F3C;HIST2H3PS2	Histone H3;Histone H3.2;Histone H3.1t;Histone H3.3;Histone H3.1;Histone H3.3C		6	30.3	0	7.075	4109500000	0.950842	0.638213	0.427284	0.313014	0.428142	0.414785	0.408277	-0.267479	0.636172	0.474047	0.497536	-0.186377	-0.628229	-0.680683	-0.58072	-0.592136	-0.187674	-0.688427	-0.0160888	0.60521	0.823749	0.62854	-0.198908	0.063641		0.58436	-0.286799		0.00183895	0.00274506		0.284737	0.140465		1.44083	-0.736285		0.0275591	-0.0137202	+	2.96104	1.30199
TMEM205	Transmembrane protein 205		2	12.9	0	6.4263	328990000	NaN	NaN	NaN	NaN	NaN	NaN	NaN	NaN	-0.756575	NaN	NaN	NaN	NaN	NaN	NaN	NaN	NaN	NaN	NaN	NaN	-0.685524	-0.584176	NaN	NaN		-4.34e-08	0		0	NaN		-4.34e-08	0		0	NaN		0	NaN		-4.34e-08	0
BLMH	Bleomycin hydrolase		2	10	0	4.2349	869740000	NaN	NaN	NaN	NaN	NaN	-0.892741	NaN	-0.83164	NaN	NaN	NaN	NaN	NaN	-0.591723	NaN	NaN	NaN	NaN	-0.11168	NaN	-0.205913	-0.0363188	-0.613542	-0.345363		0	NaN		0	NaN		0	NaN		1.06035	-0.358337		0	NaN		0	NaN
NUP62	Nuclear pore glycoprotein p62		3	11	0	15.993	1953600000	0.217479	0.29231	NaN	0.0809305	NaN	0.222063	NaN	NaN	NaN	NaN	NaN	NaN	NaN	NaN	NaN	-0.150049	NaN	NaN	NaN	-0.840293	-0.740697	0.217603	NaN	-0.637468		0	-0.136548		-4.34e-08	0		0	NaN		0	-0.855071		0.693683	0.709357		0	NaN
ZC3H4	Zinc finger CCCH domain-containing protein 4		3	5.5	0	7.1554	204300000	NaN	NaN	-0.426994	NaN	-0.529802	0.476848	NaN	NaN	NaN	NaN	NaN	NaN	NaN	NaN	NaN	NaN	NaN	NaN	NaN	NaN	-0.414787	NaN	-0.156499	NaN		0	0.903842		-4.34e-08	0		-4.34e-08	0		0	0.258289		0	-0.0122065		0	NaN
SAE1	SUMO-activating enzyme subunit 1;SUMO-activating enzyme subunit 1, N-terminally processed		8	41.9	0	17.839	3234700000	-0.191129	-0.312491	-0.189598	-0.17909	-0.353432	NaN	-0.0446723	-0.00194893	-0.110371	-0.0780915	-0.348152	-0.16822	0.113567	-0.211448	-0.204183	-0.0441368	-0.197087	NaN	0.220949	0.254473	-0.10583	0.2529	0.236217	0.786011		0.166168	-0.0144506		0.547201	-0.145824		0.253512	-0.0716716		0.630929	0.280545	+	1.34807	-0.36492		0.496434	-0.130385
TIMM50	Mitochondrial import inner membrane translocase subunit TIM50		3	36.5	0	4.9712	1073300000	NaN	NaN	NaN	NaN	NaN	NaN	0.21661	NaN	NaN	NaN	NaN	NaN	0.718614	NaN	-0.102992	NaN	-0.176723	NaN	-0.0743651	NaN	-0.197617	NaN	NaN	NaN		-4.34e-08	0		0	NaN		0	NaN		0	NaN		0	NaN		0	NaN
RPS5	40S ribosomal protein S5;40S ribosomal protein S5, N-terminally processed		12	56	0	127.01	31816000000	-0.108441	-0.108456	-0.211481	-0.148017	-0.259133	-0.235229	-0.0549317	-0.0919865	0.0436244	-0.0588186	-0.172766	-0.0735451	-0.251092	-0.115926	-0.112022	-0.0485614	0.00158601	0.0137839	0.244522	0.0404014	0.151339	-0.016585	0.0186342	0.234379		0.665613	-0.0713336		0.74113	-0.0672787		1.50034	0.148616		0.330044	0.10746		1.54338	-0.201178		0.106548	0.0168873
POLD1	DNA polymerase;DNA polymerase delta catalytic subunit		9	10.9	0	26.144	1207400000	0.844386	NaN	NaN	NaN	NaN	NaN	NaN	NaN	NaN	NaN	0.472696	NaN	0.175684	NaN	NaN	NaN	NaN	NaN	-0.896039	-0.19803	-0.593224	-1.12652	-0.386317	0.280362		0	NaN		0	NaN		0	NaN		0.176377	0.305259		0	1.48364		0	0.668701
PAFAH1B3	Platelet-activating factor acetylhydrolase IB subunit gamma		3	24.8	0.0040161	1.8765	489580000	NaN	NaN	NaN	NaN	NaN	NaN	NaN	NaN	NaN	NaN	NaN	NaN	NaN	NaN	NaN	NaN	NaN	NaN	NaN	-1.17394	NaN	-0.8593	NaN	-0.0793713		-4.34e-08	0		-4.34e-08	0		-4.34e-08	0		0	0.779929		0	NaN		-4.34e-08	0
AGPS	Alkyldihydroxyacetonephosphate synthase, peroxisomal		22	45.4	0	195.33	22121000000	1.6189	1.65164	1.59407	1.66553	1.753	1.68257	1.06867	1.3672	1.42996	1.67378	1.55257	1.23928	1.25011	1.227	1.55537	1.36525	1.31997	1.45312	-1.29276	-1.36807	-1.26524	-1.28465	-1.17465	-1.17971		1.38475	0.0788345		0.322313	0.199931		0.180283	0.0352809		2.0525	0.0902787	+	6.87876	2.92752		1.21662	0.277372
DDX39A	ATP-dependent RNA helicase DDX39A		5	44.3	0	70.668	9652600000	-0.245831	-0.214073	-0.135966	0.0646069	0.0795658	-0.0381693	-0.0836151	-0.142529	-0.0587133	-0.043869	0.0163537	-0.159138	-0.119479	-0.403981	-0.202721	-0.136854	-0.168463	-0.23686	-0.359157	0.181421	-0.264287	-0.104356	0.00230651	0.109829		1.12157	0.233958		0.151887	0.0327345		0.255876	0.0613344		0.0240968	-0.019933		0.434034	-0.136216		0.182794	0.043437
ACOT7	Cytosolic acyl coenzyme A thioester hydrolase		14	40.8	0	109.99	50303000000	2.86803	3.24568	3.81578	3.79473	3.51362	3.69008	3.50068	3.48039	3.72923	4.32063	2.04994	3.20802	3.32251	3.65947	3.24259	3.3703	3.38888	3.91236	-1.45087	-1.48447	-1.48003	-1.45839	-1.44387	-1.44627		0.436995	0.356311		0.206108	-0.377235		0.191432	0.148995		1.15538	0.027294	+	4.1896	4.78413		0.117915	-0.0983556
SNAP23	Synaptosomal-associated protein 23;Synaptosomal-associated protein		8	55.9	0	16.932	809200000	0.838669	2.01935	1.76477	1.25846	NaN	NaN	0.470823	0.635708	0.921512	0.303225	0.508429	-0.0113698	0.450802	-0.197401	0.529771	0.0224743	0.322274	0.184471	NaN	NaN	NaN	NaN	NaN	NaN		0	0.419789		0.587069	-0.409253		0.0935215	-0.0846507		-4.34e-08	0		0	NaN	+	1.39945	1.27987
KCNK1	Potassium channel subfamily K member 1		4	18.5	0	69.632	2825000000	NaN	NaN	NaN	NaN	NaN	NaN	NaN	NaN	NaN	NaN	NaN	NaN	NaN	NaN	NaN	NaN	NaN	NaN	-1.77487	NaN	-0.948196	-1.32453	-1.04883	-1.11441		-4.34e-08	0		-4.34e-08	0		-4.34e-08	0		0.105489	0.0547417		0	NaN		-4.34e-08	0
AP3B1;AP3B2	AP-3 complex subunit beta-1;AP-3 complex subunit beta-2		6	6.4	0	4.7227	547740000	NaN	NaN	NaN	NaN	0.591584	NaN	NaN	NaN	NaN	NaN	NaN	NaN	NaN	NaN	NaN	0.755315	NaN	NaN	-0.827333	-0.246823	NaN	-0.61978	-0.777715	-0.857626		0	NaN		-4.34e-08	0		0	NaN		0.597831	-0.409178		0	NaN		-4.34e-08	0
PSMD11	26S proteasome non-ATPase regulatory subunit 11		17	49.3	0	121.08	14434000000	1.19453	1.30976	1.0968	1.14483	1.14039	1.22435	0.809332	0.952632	1.11823	1.07977	0.706199	0.923035	0.985938	0.856309	1.00267	1.07957	1.01528	0.983459	-1.15419	-1.13978	-0.989994	-0.942141	-0.919424	-1.09083		0.120699	-0.0305079		0.118236	-0.057062		0.56295	0.0777985		0.169636	-0.0308441	+	4.88456	2.22433		1.51327	0.252059
PSMD12	26S proteasome non-ATPase regulatory subunit 12		9	23.7	0	24.328	3100300000	-0.196889	-0.154891	-0.212534	-0.207311	-0.282369	-0.0937251	0.0691523	0.0199154	-0.0928324	0.0234682	0.187768	-0.409681	-0.0438392	-0.119338	-0.282913	-0.0136691	0.00518438	-0.169647	-0.255443	-0.165726	-0.217927	-0.0593746	-0.260342	-0.263542		0.0283243	-0.00636354		0.161753	-0.0648933		1.02067	0.0893192		0.839569	-0.1121		0.335539	-0.040429		0.210267	-0.0394081
PGRMC1	Membrane-associated progesterone receptor component 1		5	46.7	0	30.412	3610700000	0.903193	0.818196	1.23824	1.06399	0.94043	1.22367	NaN	0.815248	0.733181	0.735262	0.608241	0.29125	0.0558898	0.227618	0.260989	0.374845	0.430499	0.232906	-0.164383	-0.316726	-0.195913	0.0112093	-0.183785	-0.038999		0.629664	0.0894867		0.655367	-0.324468		0.605642	0.164585		0.229223	0.0380875	+	2.70718	1.15369	+	2.30896	0.805043
CLIC1	Chloride intracellular channel protein 1		13	70.5	0	120.54	36164000000	-0.286533	-0.229907	-0.213253	-0.253756	-0.166033	-0.244719	-0.127258	-0.096175	-0.14765	0.0103502	-0.0277632	-0.0529249	-0.00744911	0.0127832	-0.0787769	0.0143553	0.0861043	-0.0183812	0.130404	-0.0153158	0.00705191	0.0812032	0.0496307	0.0219061		0.284094	0.0217281		1.41838	0.100248		1.10388	0.0518404		0.26518	0.0430004	+	2.72793	-0.267544	+	2.45163	-0.21875
EIF3F	Eukaryotic translation initiation factor 3 subunit F		9	34.7	0	99.008	10069000000	0.991318	0.807272	0.921665	1.02843	0.92448	0.950095	0.703367	0.7589	0.485427	0.539134	NaN	0.625551	0.782073	0.614097	0.134484	0.820975	0.922807	0.663026	-1.27188	-1.24551	-1.06486	-1.10693	-0.995592	-1.32207		0.785524	0.0609159		0.0224236	-0.0120542		0.756363	0.292051		0.249521	-0.057416	+	4.93411	2.04585		0.920114	0.396534
IPO5	Importin-5		44	61.3	0	323.31	94956000000	0.583808	0.57415	0.644318	0.51783	0.629566	0.654527	0.368377	0.405992	0.352758	0.348572	0.290071	0.38084	0.42503	0.317651	0.361993	0.436055	0.397036	0.442758	-0.343897	-0.306163	-0.321063	-0.351277	-0.348427	-0.349088		0.00101866	-0.000117362		0.31338	-0.0358817		0.881306	0.0570585		0.654363	-0.0209701	+	5.45547	0.926926	+	2.4375	0.232534
GOLIM4	Golgi integral membrane protein 4		14	22.8	0	76.228	6507100000	0.941106	1.00648	1.08794	0.83131	0.729966	1.00884	-0.506271	-0.620224	-0.570164	-0.433273	-0.109141	-0.404114	1.22361	1.58496	1.81676	1.55262	0.514097	1.71523	1.23205	1.48702	1.58222	1.31997	1.32826	1.50096		0.895631	-0.155134		0.695919	0.250044		0.246322	-0.281126		0.275749	-0.109314	+	2.17086	-0.451228	+	1.39069	-0.529937
NDUFA4	Cytochrome c oxidase subunit NDUFA4		5	59.3	0	15.603	4981100000	-0.323498	-0.297928	-0.552812	-0.291239	-0.360657	-0.281895	-0.975652	-0.721849	-0.796561	-0.730512	-0.786398	-0.823013	-0.992977	-0.926289	-0.982392	-0.896657	-0.864833	-0.841844	-0.172018	-0.21969	-0.0567312	-0.266143	-0.120059	-0.135237		0.297469	0.0801491		0.186527	0.0513794		1.30897	0.0994414		0.247798	0.0384163		0.9575	-0.210558	+	2.63211	0.575807
PSMD14	26S proteasome non-ATPase regulatory subunit 14		4	22.6	0	15.393	3032400000	-0.613498	NaN	NaN	-0.194245	-0.118414	-0.114269	NaN	NaN	NaN	NaN	-0.124613	-0.262157	0.259785	NaN	NaN	NaN	NaN	NaN	-0.290745	-0.569287	-0.0860479	-0.760529	-0.103596	-0.696704		0	0.419253		0	NaN		0	NaN		0.462215	0.108273		0	-0.141544		0	-0.873283
BIN1	Myc box-dependent-interacting protein 1		3	9	0	4.0525	311360000	NaN	NaN	NaN	NaN	-0.205813	NaN	NaN	NaN	-0.030914	NaN	NaN	NaN	NaN	0.166201	NaN	0.253626	-0.0426499	NaN	NaN	NaN	NaN	NaN	NaN	NaN		0	NaN		0	NaN		0	-0.208851		-4.34e-08	0		-4.34e-08	0		0	NaN
KPNA3	Importin subunit alpha-4		6	20.7	0	9.5771	837980000	NaN	NaN	NaN	-0.0444044	NaN	0.266037	NaN	NaN	0.460166	NaN	NaN	1.94628	0.903115	NaN	NaN	NaN	NaN	1.61904	-0.276625	NaN	-0.227405	0.165687	0.139469	NaN		0	NaN		0	1.48612		0	NaN		0	0.366874		0	NaN		0	NaN
PODXL	Podocalyxin		12	25.1	0	38.469	9353400000	1.03717	0.918997	1.01578	1.12743	1.05818	1.02758	0.262313	0.0156403	0.111031	-0.0310025	0.132906	0.1595	0.0787465	0.026021	-0.0371031	0.142217	-0.036659	0.0880058	1.84852	1.57347	1.65951	1.57241	1.3621	1.54898		0.789115	0.0804136		0.113782	-0.042527		0.278242	0.0419666		0.0292576	-0.0152626	+	3.71622	-0.611146	+	4.39714	0.968096
PIR	Pirin		14	71.4	0	93.399	33788000000	3.34028	2.96196	3.26153	3.32898	3.4448	3.50906	3.01979	2.57461	3.03346	3.01578	3.00511	2.8721	2.61551	2.70405	2.72637	3.06335	2.74283	2.67211	-1.64747	-1.81279	-1.76955	-1.82419	-1.60621	-1.87498		0.628879	0.239692		0.175838	0.0883787		0.348041	0.144115		0.487279	0.0926224	+	5.75142	4.9901	+	1.86764	0.505943
KPNA4	Importin subunit alpha-3		3	9.8	0	16.655	2529700000	0.239154	NaN	NaN	0.236707	NaN	NaN	NaN	NaN	0.782157	NaN	0.679244	NaN	0.287472	0.652876	0.634314	0.438932	NaN	NaN	-0.0322854	-0.00424777	-0.317588	0.0482362	-0.306573	-0.223189		0	-0.00244667		0	NaN		0	0.151459		0.408729	-0.096149		0	0.330354		0	-0.285734
PPP6C	Serine/threonine-protein phosphatase 6 catalytic subunit;Serine/threonine-protein phosphatase 6 catalytic subunit, N-terminally processed		3	12.4	0	4.3193	493620000	0.387473	NaN	NaN	0.132379	NaN	NaN	NaN	NaN	NaN	NaN	NaN	NaN	NaN	NaN	NaN	NaN	NaN	NaN	-0.196492	-0.298158	-0.348207	-0.361194	-0.434656	-0.323227		0	-0.255093		-4.34e-08	0		-4.34e-08	0		0.108632	0.0177279		0	0.723326		0	NaN
SCD	Acyl-CoA desaturase		6	18.1	0	11.963	2448500000	0.602457	NaN	0.810566	0.494159	0.537246	NaN	-1.18321	-1.4465	-1.3211	-1.18351	-0.993407	-1.00468	-0.0532691	-0.0145724	-0.153639	0.0746424	0.203013	0.462576	-0.197798	0.070252	-0.0535686	-0.260135	-0.188397	NaN		0	-0.108297		0.706872	0.256405		0.77943	0.320571		0.691846	-0.20144	+	1.89879	0.787662	+	2.43329	0.780339
AP3D1	AP-3 complex subunit delta-1		4	8.3	0.0010828	2.7551	1817000000	-0.826131	-2.13841	NaN	NaN	NaN	NaN	NaN	NaN	NaN	NaN	NaN	NaN	NaN	NaN	NaN	NaN	NaN	NaN	NaN	NaN	NaN	NaN	-1.24999	NaN		0	NaN		-4.34e-08	0		-4.34e-08	0		0	NaN		0	NaN		0	NaN
PDCD5	Programmed cell death protein 5		2	19.2	0	13.438	96037000	NaN	NaN	NaN	NaN	NaN	NaN	NaN	NaN	NaN	NaN	NaN	NaN	NaN	NaN	NaN	NaN	NaN	NaN	-1.0638	NaN	-1.37265	-0.681955	NaN	NaN		-4.34e-08	0		-4.34e-08	0		-4.34e-08	0		0	NaN		0	NaN		-4.34e-08	0
PSMA7	Proteasome subunit alpha type-7		10	51.6	0	65.286	4712700000	-0.22238	-0.083233	-0.368272	-0.33468	-0.282228	-0.461005	-0.176397	-0.291574	-0.368793	-0.176919	-0.236724	0.087327	-0.172506	0.0347792	0.0480967	-0.614006	-0.237711	-0.0986137	0.00302647	0.0130691	-0.00784072	-0.112459	0.0792927	-0.0335991		1.26714	-0.134676		0.445506	0.17015		1.10602	-0.2869		0.625921	0.0519836		0.972551	-0.188885		0.828547	-0.194752
SCAMP3	Secretory carrier-associated membrane protein 3		3	33.7	0	117.65	13144000000	0.612494	0.816313	0.763582	0.579373	0.649018	0.630685	-0.611733	-0.53822	-0.569736	-0.717667	-0.530698	-0.532366	-0.283984	-0.1849	-0.243831	-0.172067	-0.190569	-0.259824	0.692249	0.708408	0.682124	0.734569	0.857742	0.531668		0.958834	-0.111104		0.163061	-0.0203469		0.26788	0.0300848		0.0425341	-0.0144805		0.13105	0.0224294	+	3.86231	0.968368
MGST3	Microsomal glutathione S-transferase 3		3	16.9	0	18.056	3233400000	0.414893	NaN	0.384823	NaN	NaN	0.469365	NaN	NaN	NaN	NaN	NaN	1.10923	NaN	NaN	NaN	NaN	NaN	NaN	NaN	-0.503098	-0.347105	-0.638928	-0.0878714	NaN		0	0.0845417		0	NaN		-4.34e-08	0		0	0.259234	+	2.41936	0.896235		0	NaN
HAT1	Histone acetyltransferase type B catalytic subunit		7	22.4	0	32.992	2115000000	0.196985	0.728399	0.53047	0.511266	0.803144	0.142087	NaN	-0.164286	0.0216219	-0.0876414	NaN	-0.12133	0.207893	0.117562	-0.0225955	0.276556	0.732226	NaN	0.785843	0.147437	-0.150289	-0.140062	0.0655723	-0.00964047		0.000318889	0.00021408		0	-0.142951		0.367363	0.341664		0.76505	0.32823	+	1.35921	0.532923		1.06927	0.384332
UQCRQ	Cytochrome b-c1 complex subunit 8		8	58.5	0	39.474	28703000000	-0.388525	-0.585453	-0.48348	-0.447131	-0.446404	-0.478889	-0.854023	-0.835291	-0.866673	-0.930298	-0.860216	-0.893062	-0.952769	-0.848635	-1.01815	-0.963476	-0.992202	-0.884674	-0.116192	-0.0566412	-0.0591191	-0.0364223	0.0368901	-0.115598		0.170831	0.0283451		0.892952	-0.0425298		0.0274133	-0.00693339		0.0855324	-0.0142387	+	2.79181	-0.435092	+	2.41883	0.454031
GAK	Cyclin-G-associated kinase		2	3.8	0.0010678	2.5156	994810000	NaN	NaN	NaN	NaN	NaN	NaN	NaN	NaN	NaN	NaN	NaN	NaN	NaN	NaN	NaN	NaN	NaN	NaN	-0.269999	NaN	NaN	0.0833836	-0.236945	1.66339		-4.34e-08	0		-4.34e-08	0		-4.34e-08	0		0	1.58001		0	NaN		-4.34e-08	0
XPO1	Exportin-1		45	54.9	0	292.95	50620000000	0.96451	0.897473	0.985209	0.941257	0.909274	0.973942	0.692606	0.673828	0.730053	0.641916	0.702037	0.615887	0.545672	0.479334	0.513794	0.470094	0.51662	0.592732	-0.0117189	0.00144204	0.0945064	0.0832474	-0.000851479	-0.0354313		0.269021	-0.00757297		0.415745	-0.0455488		0.0986692	0.013549		0.848942	-0.0757325	+	4.63693	0.889332	+	3.73924	0.43613
PLXNB2	Plexin-B2		7	3.9	0	6.8251	413160000	NaN	-0.403847	0.457752	0.660199	0.465191	0.0751904	NaN	NaN	NaN	NaN	NaN	NaN	NaN	0.390117	0.348799	NaN	NaN	NaN	NaN	NaN	0.0387171	-0.0298974	NaN	-0.0482779		0.116909	0.243238		-4.34e-08	0		0	NaN		0	-0.0183806		0.0163101	0.0225424		0.29211	-0.342506
PFAS	Phosphoribosylformylglycinamidine synthase		11	11.4	0	18.375	1411400000	NaN	-0.422888	-0.0994327	-0.927304	-0.345436	-0.226054	-0.152981	-0.152548	-0.312904	NaN	NaN	-0.513214	-0.230702	-0.0247807	-0.261466	-0.213671	NaN	-0.301248	-0.266507	-0.112927	0.0237521	-0.17171	-0.367546	-0.272855		0.0708469	-0.024585		0	-0.20031		0.120613	-0.0113758		0.862246	-0.215341		0.51292	-0.174199		0.218561	-0.0888441
NPC1	Niemann-Pick C1 protein		11	9.2	0	43.803	6186600000	0.919836	1.02418	0.854315	0.929715	0.886667	0.942533	-0.017899	-0.045223	-0.144393	-0.332626	0.038998	-0.123418	0.28155	0.232538	0.317767	0.331705	0.369829	0.190046	0.483983	0.778965	0.726657	0.588325	0.82326	0.717035		0.0650099	-0.0131376		0.201033	-0.0698436		0.084942	0.0199085		0.0553708	-0.0232229	+	1.44745	0.234794	+	3.53807	0.655491
DEGS1	Sphingolipid delta(4)-desaturase DES1	+	3	14.9	0	19.649	3497100000	-0.389962	-0.72311	-0.200565	NaN	NaN	NaN	-0.615596	1.47399	1.16253	NaN	NaN	NaN	0.0396999	NaN	NaN	NaN	NaN	NaN	1.4143	0.178109	0.00317045	0.065848	1.50584	NaN		0	NaN		0	NaN		0	NaN		1.20939	1.36943	+	1.49509	-0.520255		0	-0.477579
SCAMP1	Secretory carrier-associated membrane protein 1		6	32.5	0	35.771	4108400000	0.710349	0.981707	0.893518	1.09727	0.476745	0.499272	-0.268226	-0.131803	-0.227574	-0.49879	-0.492931	-0.423081	-0.00831944	-0.304576	0.30229	-0.127274	0.569783	0.210015	1.11143	0.686164	0.957915	0.498149	0.596076	0.748976		0.218381	-0.170761		1.45648	-0.2624		0.245287	0.221043		0.152678	0.104752		0.402425	0.147782	+	1.96365	0.865393
ARPC2	Actin-related protein 2/3 complex subunit 2		4	19.3	0	6.5785	1152900000	0.155231	NaN	NaN	-0.0636353	0.101919	0.0878702	0.127897	-0.189055	-0.00789873	NaN	NaN	NaN	NaN	NaN	NaN	0.0875986	0.184598	-0.651382	-0.112054	0.347099	0.754888	0.488412	0.254473	0.108491		0	-0.218866		0	NaN		0	NaN	+	2.20681	-0.446496		0	-0.374902		0	NaN
ARPC3	Actin-related protein 2/3 complex subunit 3		4	35.4	0	15.687	1684600000	0.0360461	-0.0897278	-0.476398	-0.31113	-0.228267	-0.268834	NaN	-0.607573	NaN	-0.303597	-0.661228	-0.424552	NaN	-0.38304	NaN	NaN	NaN	-0.178633	-0.00433462	0.654435	0.174279	0.640621	0.057277	0.355016		0.204536	-0.0927171		0	-0.053655		0	NaN		0.802257	-0.353792	+	1.40748	-0.666472		0	0.206347
PGRMC2	Membrane-associated progesterone receptor component 2		8	41.7	0	59.431	4826900000	0.53665	0.709291	0.453333	0.72927	0.801821	0.709996	0.439038	0.288772	0.32458	0.338567	0.531868	0.468218	0.134089	0.0877344	0.109561	-0.0432742	0.253263	0.292075	-0.451741	-0.634487	-0.641896	-0.348243	-0.373907	-0.629769		1.19819	0.180604		0.348198	0.095421		0.170429	0.056893		0.112078	0.0564033	+	3.08086	1.10797	+	2.39921	0.455963
GNPAT	Dihydroxyacetone phosphate acyltransferase		8	14.5	0	20.377	834580000	NaN	1.20521	NaN	NaN	NaN	NaN	0.55031	1.28523	NaN	-0.265379	NaN	NaN	NaN	NaN	NaN	NaN	NaN	NaN	-1.17896	-0.961423	-1.25188	-1.17355	-0.560749	-0.667195		0	NaN		0	-0.815689		-4.34e-08	0		0.443755	0.32665		0	2.33416		0	NaN
SURF4	Surfeit locus protein 4		6	42.5	0	66.833	21274000000	0.88573	0.913875	1.02397	0.747946	0.893285	0.859333	0.296898	0.285225	0.198745	0.491289	0.438186	0.240253	-0.0404227	0.225028	0.248656	0.139862	0.194717	0.174279	-0.324238	-0.224621	-0.255942	-0.27701	-0.277359	-0.38007		0.868721	-0.107669		0.979298	0.12962		0.108541	0.0251989		0.969539	-0.0746985	+	4.92689	1.19371	+	2.84172	0.79677
SPTLC1	Serine palmitoyltransferase 1		9	27.1	0	26.675	1732400000	NaN	NaN	NaN	NaN	2.29731	1.71462	0.147176	0.442333	-0.277219	0.0832474	NaN	0.250719	0.0870554	NaN	NaN	NaN	NaN	NaN	NaN	NaN	0.777283	NaN	NaN	0.92235		0	NaN		0.239038	0.232005		0	NaN		0	NaN		0	NaN		0	NaN
PMM2	Phosphomannomutase 2;Phosphomannomutase		2	26.9	0	8.8978	902130000	NaN	-0.493276	-0.352308	NaN	-0.751854	-0.550613	NaN	-0.384584	-0.124472	-0.493906	NaN	-0.399768	-0.418832	-0.183736	-0.364905	NaN	NaN	-0.655353	-0.16895	0.063779	0.106616	0.014641	-0.264443	-0.0553814		1.07831	-0.228441		0	-0.275297		0	-0.290448		0.910232	-0.224604	+	2.34524	-0.484471		0.384139	-0.100301
PPM1G	Protein phosphatase 1G	+	24	55.5	0	258.2	63321000000	-0.744511	-0.733747	-0.727929	0.33594	0.335255	0.346078	-0.550676	-0.62988	-0.406197	0.267835	0.0247452	0.0469799	0.245617	0.0949116	0.155749	0.863859	0.963104	0.772477	0.874994	-0.118962	-0.228571	-0.230178	0.954941	0.909965	+	5.02168	1.07449	+	1.5847	0.642105	+	1.85654	0.701054	+	2.57223	1.10587	+	3.8952	-0.542826	+	4.47183	-0.900822
EIF3D	Eukaryotic translation initiation factor 3 subunit D		3	6.6	0	4.1904	826020000	-0.283474	NaN	-0.546878	NaN	0.168385	-0.0908029	-0.192414	NaN	NaN	-0.16647	NaN	-0.254857	NaN	NaN	-0.119573	-0.141271	0.287354	NaN	-0.191788	-0.232227	-0.146324	-0.264027	-0.189269	0.0422241		0	0.456075		0	0.025944		0	NaN		0.358812	0.101248		0.795658	-0.200984		0	-0.295603
IPO8	Importin-8		5	9.9	0	9.6632	609030000	1.22379	NaN	NaN	NaN	NaN	NaN	NaN	NaN	1.65223	NaN	NaN	0.331935	0.722379	NaN	NaN	NaN	NaN	NaN	0.166587	NaN	0.121944	NaN	0.0897694	-0.327783		0	NaN		0	-1.3203		0	NaN		0	-0.0321743		0	1.10185		0	0.501415
SLC16A3	Monocarboxylate transporter 4		16	31.2	0	143.41	55220000000	2.22385	2.2904	2.30176	2.3921	2.50531	2.34775	1.70164	1.69644	1.68576	1.72513	1.72277	1.75343	1.88667	1.92155	1.71559	2.04201	1.89914	1.95829	-1.48604	-1.3039	-1.2738	-1.26673	-1.31941	-1.39142		0.979506	0.143047		0.954068	0.039166		0.602658	0.125211		1.0122	-0.11748	+	7.7097	3.55348	+	2.49468	0.430737
ABCC4	Multidrug resistance-associated protein 4		12	10.6	0	15.991	1266900000	NaN	NaN	NaN	NaN	NaN	0.196985	NaN	NaN	NaN	-2.0932	NaN	NaN	NaN	NaN	NaN	NaN	NaN	NaN	-0.267826	-0.276538	-0.314912	-0.040126	-0.676203	-0.534997		0	NaN		0	NaN		-4.34e-08	0		0.695612	-0.282484		0	NaN		-4.34e-08	0
ARPC5	Actin-related protein 2/3 complex subunit 5		3	24.5	0	11.581	2066800000	-0.170378	0.0507454	-0.287853	-0.345344	-0.0395625	0.142217	NaN	0.0468402	0.192699	-0.194361	-0.116192	0.0448837	-0.0161034	-0.115332	-0.116942	-0.466496	-0.134556	0.00173014	0.3122	0.712728	NaN	0.326652	0.273218	0.232906		0.0975358	0.054932		1.5067	-0.155424		0.247684	-0.116982		0.451451	-0.247137	+	1.37272	-0.655519		0.194396	-0.053036
DHX15	Pre-mRNA-splicing factor ATP-dependent RNA helicase DHX15		9	12.8	0	10.473	4083100000	0.355242	NaN	-0.311775	0.146525	0.479127	-0.0793409	-0.177017	0.760263	0.133432	0.380951	NaN	-0.00242579	-0.139967	-0.139872	-6.16452	-2.84871	NaN	-0.113739	-0.0390436	0.0180643	0.0280033	0.222681	0.0272955	0.0843364		0.0151096	0.0118585		0.185719	0.211055		0.11466	1.67102		0.613835	-0.0653867		0.0898395	-0.0678494		0.331709	2.16985
PHGDH	D-3-phosphoglycerate dehydrogenase		23	53.8	0	269.64	101860000000	1.71835	1.59335	1.73184	1.34687	1.59331	1.63311	1.13953	1.05894	1.00985	1.11962	1.07717	1.11043	0.823097	0.756425	0.737946	0.828713	0.757877	0.880803	-0.227439	-0.155823	-0.171352	-0.1538	-0.116129	-0.272402		0.532167	-0.156752		0.345153	0.0329677		0.403856	0.0499745		0.321086	-0.0449982	+	5.69342	1.8415	+	4.23059	0.90869
PSMD3	26S proteasome non-ATPase regulatory subunit 3		12	25.7	0	34.178	2656500000	0.236095	0.495388	0.013641	0.310224	NaN	0.0553346	0.339251	NaN	-0.369129	0.194591	0.326307	-0.640816	0.0946415	0.38228	-0.0323297	-0.224536	-0.0329052	-0.410678	-0.0890218	-0.561196	-0.327421	-0.38272	-0.371814	-0.544351		0.759878	0.0579114		0.724639	-0.208174		2.24902	-0.370904		0.159069	0.0887168	+	1.90051	0.672154		0.209096	0.100177
GPAA1	Glycosylphosphatidylinositol anchor attachment 1 protein		5	7.4	0	4.8999	222180000	NaN	NaN	NaN	NaN	NaN	NaN	NaN	NaN	NaN	NaN	NaN	NaN	-0.560962	NaN	NaN	NaN	NaN	NaN	-0.103906	NaN	NaN	NaN	0.170438	NaN		-4.34e-08	0		-4.34e-08	0		0	NaN		0	NaN		-4.34e-08	0		0	NaN
B4GAT1	Beta-1,4-glucuronyltransferase 1		7	24.3	0	10.533	864410000	NaN	NaN	NaN	NaN	-0.0654458	0.0709388	-0.82133	-0.764665	-0.75599	-0.73598	NaN	-0.812511	NaN	NaN	NaN	NaN	0.492315	NaN	NaN	-0.182491	NaN	NaN	NaN	NaN		0	NaN		0.0592969	0.0144143		0	NaN		0	NaN		0	NaN		-4.34e-08	0
XPOT	Exportin-T		16	22	0	78.671	12597000000	1.18587	1.1891	1.25894	1.24221	0.956874	1.25882	0.714224	0.87633	0.803971	1.03408	0.0169242	0.816641	0.632734	0.568908	0.477367	0.605305	0.873577	0.849039	-0.343787	-0.27073	-0.284142	-0.181149	-0.105551	-0.326407		0.240516	-0.0586679		0.175029	-0.175628		0.654236	0.216304		0.0433325	-0.0132415	+	5.462	1.45664	+	3.66506	0.651632
TIMM44	Mitochondrial import inner membrane translocase subunit TIM44		5	12.6	0	10.027	1022200000	0.602362	NaN	NaN	NaN	NaN	NaN	NaN	NaN	NaN	NaN	NaN	NaN	NaN	NaN	NaN	NaN	0.481919	NaN	-0.112911	0.662023	NaN	-0.301568	-0.0378286	-0.0304867		0	NaN		-4.34e-08	0		0	NaN		0.146164	-0.251927		0	0.422134		0	NaN
TRAPPC3	Trafficking protein particle complex subunit 3		11	53.3	0	48.778	20480000000	2.18047	2.48661	2.63564	2.58837	2.59777	2.63923	1.18034	1.08692	1.25072	1.16967	0.793605	0.839476	-1.22671	-1.25842	-1.29117	-1.06121	-1.07012	-1.12633	-0.374206	-0.373813	-0.391759	-0.416693	-0.366541	-0.402283		0.543205	0.17422		0.73828	-0.23841		2.7022	0.172883		0.657275	0.0130782	+	4.51887	2.82833	+	4.97048	3.69301
TSPAN6	Tetraspanin-6		8	31	0	28.829	9973600000	1.51994	1.56111	1.53296	1.58578	1.58313	1.5708	-0.165742	-0.236962	-0.160508	-0.212217	-0.170881	-0.109141	0.470407	0.429428	0.393965	0.569102	0.541317	0.425996	2.24458	2.222	2.29657	2.17996	1.99295	2.14981		1.08566	0.0419003		0.24262	0.0236579		1.08584	0.0808716		0.384293	-0.103729	+	4.3625	-0.694839	+	5.79354	1.10674
ASNA1	ATPase ASNA1		7	30.5	0	19.386	3207200000	NaN	NaN	NaN	0.92562	NaN	1.05464	NaN	0.893595	NaN	0.388796	NaN	NaN	0.788936	0.394185	NaN	NaN	NaN	NaN	-0.566357	-0.878189	-0.735596	-0.800626	-0.64609	-1.08293		0	NaN		0	NaN		0	NaN		0.0756219	0.039679		0	NaN		0	NaN
BUB3	Mitotic checkpoint protein BUB3		9	33.4	0	27.487	1700500000	-0.196442	-0.17467	-0.2162	-0.314033	-0.0526406	-0.168496	-0.290268	-0.220782	0.105008	-0.01749	0.0251707	NaN	0.0250288	0.0395595	NaN	NaN	NaN	0.185993	0.252658	0.417272	0.242694	0.365245	0.21014	0.188401		0.0814451	0.017381		1.4829	0.259366		0	NaN		0.942194	-0.124671	+	3.2701	-0.537508	+	3.09397	-0.228065
ACTN4	Alpha-actinin-4		22	51.3	0	230.69	29751000000	0.152118	0.0257376	0.0772429	0.31603	0.051024	0.00762616	0.840765	1.58395	1.92201	1.8474	1.44806	1.31678	1.51147	1.05631	1.54651	1.15251	1.01414	1.22928	-0.205547	0.286053	0.1149	0.317304	-0.186754	-0.281421		0.210304	0.0398604		0.0603032	0.0885028		0.861474	-0.239452		1.4775	-0.463993		0.994158	-0.154386	+	2.86492	-1.2864
SYNGR2	Synaptogyrin-2		4	17	0	6.8145	1564300000	NaN	-0.174621	0.119423	0.0299829	0.00460933	0.236585	NaN	-0.100778	NaN	-0.0966069	NaN	NaN	NaN	-0.28351	-0.138584	-0.0205892	NaN	NaN	-1.851	-1.41542	NaN	-1.73255	-1.61825	-1.49561		0.881344	0.148196		0	NaN		0	NaN		0.0876945	-0.0993221	+	1.7213	1.54639		0.42087	0.183448
SLC25A20	Mitochondrial carnitine/acylcarnitine carrier protein		6	20.3	0	4.9702	239230000	NaN	NaN	NaN	NaN	NaN	NaN	0.168385	NaN	NaN	NaN	NaN	NaN	NaN	NaN	NaN	NaN	NaN	NaN	-1.00191	-0.969622	NaN	NaN	-0.840552	-0.785975		-4.34e-08	0		0	NaN		-4.34e-08	0		0	-0.0322842		0	NaN		-4.34e-08	0
NARS	Asparagine--tRNA ligase, cytoplasmic		9	19	0	53.834	2378400000	0.41045	-0.0695579	0.321582	-0.535708	-0.112038	-0.163543	-0.132467	-0.247782	0.331361	0.32112	NaN	-0.324889	-0.206395	NaN	-0.0944334	NaN	NaN	NaN	-0.000620475	-0.136474	0.143916	0.238787	0.1125	0.101784		0.698106	-0.491254		0.0530487	-0.101331		0	NaN		0.0439179	-0.0108549		0.304369	0.138748		0.815709	0.371239
SLC25A17	Peroxisomal membrane protein PMP34		11	33.9	0	81.428	8278800000	2.59426	NaN	2.54641	1.79701	NaN	1.91694	3.6903	NaN	3.71567	3.42828	3.852	NaN	2.00209	NaN	NaN	2.76825	2.4648	2.71352	-1.93998	-1.73097	-2.01987	-1.92467	-1.77888	-1.98057		1.12773	-0.713363		0	-0.262029		0	0.766158		0.0189211	-0.00797153	+	4.46812	4.46217		0	0.568247
LANCL1	LanC-like protein 1		9	26.8	0	11.081	1715700000	-0.513976	0.0332292	0.067914	-0.283562	0.213752	-0.294597	-0.218229	-0.461978	-0.317517	-0.421322	-0.0918942	NaN	0.0446039	-0.321405	-0.0972395	-0.138696	-0.570229	-0.0205745	0.00575919	-0.148449	-0.380916	-0.300857	-0.0908797	-0.200763		0.0268742	0.0161416		0.0864399	0.0834956		0.449176	-0.118486		1.07159	0.181446		0.279229	0.13913		0.0198894	-0.0129305
CALU	Calumenin		3	9.5	0	4.2307	570060000	NaN	NaN	0.677441	0.435415	0.631337	0.851519	NaN	0.0352017	NaN	NaN	NaN	0.512985	0.291839	0.267835	NaN	NaN	NaN	0.548831	1.4305	0.283803	1.18669	0.82171	NaN	1.1624		0	0.174079		0	NaN		0	NaN		0.500116	0.743695		0	-0.0866275		0	0.397603
FADS1	Fatty acid desaturase 1		12	32.9	0	47.561	3778700000	NaN	NaN	1.70955	1.7876	2.06437	2.20858	0.471864	0.287709	0.521252	0.678432	0.323197	0.680054	-0.609618	-0.671049	-0.718901	-1.06567	-0.84143	-0.679388	-0.949032	-0.749887	-0.630975	-0.951122	-0.682187	-0.604762		0	0.499024		0.921246	0.13362		0.513932	-0.195641		0.0642952	0.0320015		0	2.48688		0	2.37608
ACSL4	Long-chain-fatty-acid--CoA ligase 4		7	17.9	0	26.462	2037700000	1.98309	NaN	2.31918	NaN	NaN	1.79784	0.423309	NaN	0.666757	1.03963	NaN	0.765535	0.14965	0.460271	-0.0321084	0.384823	0.133827	0.234746	0.0563061	-0.0854967	-0.199951	0.0652966	0.193456	0.157173		0	-0.521341		0.399213	0.357549		0.10236	0.0585282		0.811345	0.209029	+	3.09589	2.22452	+	2.50225	1.95854
STX10	Syntaxin-10		7	44.3	0	33.331	2277700000	NaN	0.97519	1.32889	NaN	1.26454	NaN	0.165944	-0.166179	0.00475299	-0.254875	NaN	NaN	0.572017	0.348119	0.227618	0.394624	NaN	0.404794	-0.425017	0.261832	0.15082	-0.170589	0.0114957	-0.177148		0	0.289346		0	-0.420819		0.00016877	-0.000108197		0.503036	-0.277577	+	1.81943	1.07135	+	1.59529	0.769457
MGEA5	Protein O-GlcNAcase		8	14.8	0	8.4769	682790000	NaN	NaN	NaN	NaN	NaN	NaN	NaN	NaN	NaN	-0.642797	NaN	-0.126281	NaN	NaN	NaN	NaN	NaN	NaN	-0.0290286	NaN	-0.00759407	-0.435827	-0.0179282	-0.121753		-4.34e-08	0		0	NaN		-4.34e-08	0		0.283213	0.15187		0	NaN		-4.34e-08	0
SYNCRIP	Heterogeneous nuclear ribonucleoprotein Q		8	25.3	0	75.032	8512400000	0.148869	-0.113551	-0.0535386	0.169412	0.0881415	-0.0646006	-0.147458	0.327342	0.0839282	-0.0710423	-0.0247513	0.231924	0.133037	-0.14709	-0.108394	-0.150001	-0.088224	-0.145206	-0.32525	-0.130365	-0.170621	-0.310916	-0.468052	-0.289316		0.398467	0.0703913		0.091119	-0.0425609		0.316085	-0.0869947		0.625003	-0.156905		0.961042	0.197894		0.105949	0.0347421
RANBP6	Ran-binding protein 6		2	4	0	13.096	4500400000	NaN	-0.135111	NaN	NaN	0.629193	NaN	-0.382025	0.506196	NaN	NaN	NaN	NaN	NaN	NaN	NaN	NaN	NaN	NaN	-0.18218	-0.113504	-0.188118	NaN	-0.222801	-0.214726		0	0.764304		0	NaN		-4.34e-08	0		0.694054	-0.0516795		0	0.0157006		0	NaN
PLIN3	Perilipin-3		17	67.8	0	159.24	12416000000	0.489235	0.498966	0.489132	0.346872	0.562084	0.306845	0.148869	0.0694272	0.063641	0.242206	0.169412	0.208767	-0.453083	-0.309628	-0.444596	-0.0376657	-0.0734236	-0.343257	-0.472809	-0.531886	-0.598872	-0.655081	-0.341702	-0.27687		0.431571	-0.087177		1.69534	0.112816		0.958251	0.250987		0.884139	0.231486	+	5.15757	1.08772	+	4.3638	0.89488
KPNA6;KPNA5	Importin subunit alpha-7;Importin subunit alpha-6		2	12.1	0	25.771	790520000	NaN	NaN	0.529371	NaN	NaN	NaN	NaN	NaN	NaN	NaN	NaN	NaN	NaN	NaN	NaN	NaN	NaN	NaN	-0.353082	-0.130918	-0.577401	-0.697008	-0.351075	-0.291928		0	NaN		-4.34e-08	0		-4.34e-08	0		0.26702	0.136415		0	0.997814		0	NaN
UGDH	UDP-glucose 6-dehydrogenase		14	41.7	0	22.68	2824900000	0.595504	0.591392	0.485324	0.366924	1.046	0.435629	0.488104	1.10057	0.986593	NaN	NaN	1.14111	1.37851	1.28511	NaN	NaN	1.20207	1.16858	0.749834	0.258579	0.659559	0.719402	0.454913	0.463309		0.0964372	0.0587782		0	0.154513		0	-0.0830334		0.0131526	0.0101717		0.025984	0.0115595	+	3.03898	-0.774402
USO1	General vesicular transport factor p115		4	5.6	0	10.472	1113500000	1.0606	0.634129	NaN	0.583134	NaN	NaN	0.480575	NaN	NaN	NaN	NaN	NaN	2.90568	0.226262	NaN	NaN	0.0220482	0.29125	2.26168	0.348799	-0.143851	NaN	2.19827	0.35321		0	-0.477467		0	NaN		0	-0.204214		1.19378	2.1275	+	0.825229	0.744891		0.187602	-0.718605
PRAF2	PRA1 family protein 2		5	27	0	17.682	7794000000	1.97093	1.86639	2.06191	2.01842	2.13777	NaN	0.042084	0.357158	0.200128	0.138421	0.330788	0.164271	-0.538492	-0.563966	-0.480559	-0.404859	NaN	-0.287237	-0.872657	-0.746688	-0.679365	-0.824929	-0.63767	-0.920571		0.409268	0.159433		0.0891507	0.0113703		0.939474	0.163477		0.437779	-0.0599719	+	5.56905	2.71674	+	5.65174	2.49408
CUTA	Protein CutA		3	37.8	0	40.1	4691500000	NaN	NaN	NaN	0.58477	NaN	NaN	NaN	-0.601081	NaN	NaN	NaN	NaN	0.214498	NaN	NaN	NaN	-0.259547	NaN	-1.42051	-1.44105	-1.34011	-1.39642	-1.50853	-1.56525		0	NaN		0	NaN		0	NaN		0.626994	-0.105568		0	NaN		0	NaN
WDR1	WD repeat-containing protein 1		15	29.2	0	51.96	5303700000	-0.278234	-0.433779	-0.167167	-0.239822	-0.217273	-0.239123	0.0230425	-0.0549017	0.119024	0.0413831	-0.223458	-0.125006	-0.289722	-0.170264	-0.299028	0.0156403	-0.640816	-0.226223	0.356256	0.36614	0.189287	0.1125	0.398898	0.424815		0.264857	0.0609872		0.630789	-0.131415		0.0430136	-0.0307952		0.668959	0.17068	+	2.05816	-0.515702		0.172837	-0.0400554
CPNE3;CPNE8;CPNE5;CPNE2;CPNE9;CPNE7	Copine-3;Copine-5;Copine-2;Copine-9;Copine-7;Copine-8		1	3.4	0	4.7548	489410000	0.00619029	NaN	NaN	NaN	NaN	-0.323209	NaN	-0.322541	0.358621	NaN	NaN	NaN	-0.264773	NaN	NaN	-0.321369	-0.314338	NaN	0.18053	-0.275402	NaN	NaN	0.337311	-0.12751		0	NaN		0	NaN		0	-0.0565967		0	0.455932		0	0.281592		0	0.270963
PDCD6	Programmed cell death protein 6		10	67.5	0	47.892	10570000000	0.187768	0.189793	0.434882	0.156655	0.160662	0.256648	-0.474212	-0.0387471	0.543694	0.075738	0.0147838	0.0515809	0.0539454	0.221568	-0.140873	-0.0918173	-0.0265136	0.0673633	0.236095	0.0437644	0.114767	0.298541	0.00417777	-0.0474875		0.604346	-0.0794922		0.0394809	0.0371225		0.155962	-0.0618692		0.201499	-0.0880958		0.457205	0.118457		0.783378	0.225934
VPS4B	Vacuolar protein sorting-associated protein 4B		3	8.1	0	8.0854	290530000	NaN	NaN	NaN	NaN	NaN	NaN	NaN	NaN	NaN	NaN	NaN	NaN	NaN	NaN	NaN	NaN	NaN	NaN	-0.431073	-0.7712	-0.794933	NaN	-1.32543	-0.739757		-4.34e-08	0		-4.34e-08	0		-4.34e-08	0		0.0640126	-0.0951855		0	NaN		-4.34e-08	0
FLNB	Filamin-B		27	17	0	86.211	2846900000	0.015783	0.471552	-0.0799354	-0.143452	-0.025647	0.12075	0.0350608	0.129349	-0.0985673	-0.62872	0.25544	-0.196426	0.141433	-0.183343	0.133037	-0.0511899	-0.41889	0.298424	0.0874628	0.00590291	0.115965	0.37529	0.432104	0.445091		0.276086	-0.151916		0.334864	-0.211849		0.250329	-0.0875944		0.717687	0.155833		0.0508085	-0.0299195		0.202365	0.105424
SEC22B	Vesicle-trafficking protein SEC22b		7	38.1	0	128.01	8444500000	1.08862	0.913033	0.828469	0.639325	0.502025	0.802069	0.688583	0.853277	0.715718	0.807932	0.541713	0.629007	0.489851	0.535953	0.704075	0.476122	0.446891	0.403486	-0.496509	-0.616238	-0.410083	-0.534496	-0.509101	-0.693691		0.795694	-0.295567		0.273395	-0.0929754		0.588634	-0.13446		0.193433	-0.0461616	+	3.9443	1.46365	+	1.66129	0.366746
ERLIN1;ERLIN2	Erlin-1;Erlin-2		1	15.9	0	8.4592	242000000	NaN	NaN	NaN	NaN	NaN	NaN	NaN	NaN	NaN	NaN	NaN	NaN	NaN	NaN	NaN	NaN	NaN	NaN	NaN	NaN	-0.353266	-0.670543	-0.203784	NaN		-4.34e-08	0		-4.34e-08	0		-4.34e-08	0		0	0.149482		0	NaN		-4.34e-08	0
BANF1	Barrier-to-autointegration factor;Barrier-to-autointegration factor, N-terminally processed		3	48.3	0	14.222	1478500000	NaN	-0.299969	NaN	NaN	-0.0796915	NaN	NaN	NaN	NaN	NaN	NaN	-0.716339	NaN	NaN	NaN	NaN	-0.729722	-0.572737	-0.00109689	NaN	0.0720372	NaN	NaN	0.067501		0	0.220277		0	NaN		0	NaN		0	NaN		0	-0.372006		0	NaN
SF3B1	Splicing factor 3B subunit 1		24	24.8	0	56.971	4157000000	0.748204	0.61306	0.867659	0.49968	0.424815	0.970117	0.163756	0.716508	0.819178	NaN	0.287945	0.067914	0.440846	0.678252	0.592349	0.555031	0.726308	0.964584	-0.250749	-0.253446	-0.444007	-0.304968	-0.417001	-0.491146		0.385258	-0.111437		0.769632	-0.589913		0.670751	0.178158		0.284131	-0.0521578	+	3.4984	1.07711		0.787189	0.172492
SNRNP200	U5 small nuclear ribonucleoprotein 200 kDa helicase		6	3.7	0	6.7978	1322900000	-0.351571	-0.651111	NaN	NaN	NaN	0.113167	NaN	NaN	0.0209111	NaN	NaN	NaN	NaN	0.844627	-0.441928	NaN	-0.161137	0.251204	-0.132989	NaN	0.304628	NaN	-0.217742	0.476434		0	NaN		0	NaN		0.0534764	-0.156316		0	-0.52237		0	-0.805969		0.399215	-0.70269
PPM1B	Protein phosphatase 1B	+	7	26.1	0	20.197	3968700000	-0.932857	-0.90996	-0.96463	-0.206628	-0.292263	-0.381799	-0.556457	-0.703032	-0.262521	-0.690731	-0.202522	-0.122428	0.345737	0.0791561	0.153416	0.690462	0.448161	0.0947765	0.705226	0.0163537	0.0526941	0.176451	0.671022	1.02077	+	2.34782	0.642252		0.341575	0.168776		0.591727	0.218363	+	2.06788	0.717173	+	4.42971	-1.01765	+	3.81287	-1.12859
RP2	Protein XRP2	+	5	12	0	6.3904	951650000	-1.28859	NaN	-1.04618	-0.0753832	-0.511567	-0.640074	-1.30686	NaN	-1.16576	-0.52166	NaN	-1.39483	NaN	NaN	NaN	NaN	NaN	NaN	NaN	0.176323	NaN	-0.286375	0.501414	NaN		0.531113	0.809656		0.167038	0.278064		-4.34e-08	0		0	NaN	+	1.29283	-1.11236		0	NaN
EIF3G	Eukaryotic translation initiation factor 3 subunit G		5	16.9	0	31.581	2366700000	-0.227827	-0.237762	-0.365295	-0.137283	-0.279669	-0.261051	-0.2541	-0.00797119	NaN	0.0880058	0.422556	-0.245386	-0.186886	-0.511382	0.0848807	-0.0201941	-0.0648873	0.0172092	-0.706064	-0.464206	-0.470389	-0.575486	-0.458029	-0.401635		0.410834	0.0509606		1.13942	0.386317		0.461271	0.181838		0.0495235	-0.0185492	+	1.77917	0.226399		0.152085	-0.0724989
EIF3J	Eukaryotic translation initiation factor 3 subunit J		6	23.6	0	13.075	2029200000	-0.234686	-0.103565	-0.0539429	-0.0731808	-0.0711029	-0.0367775	0.0104934	0.0996318	-0.0180158	0.0543624	-0.141446	0.331361	0.0464211	0.278104	0.183201	0.0434844	0.0874628	0.0103502	-0.286551	-0.0639822	-0.110698	-0.164949	-0.149281	-0.104868		0.578358	0.0703777		0.10011	0.0507228		0.749716	-0.122143		0.298131	-0.0670234		0.102812	-0.0175217	+	1.59614	-0.299973
ZMPSTE24	CAAX prenyl protease 1 homolog		17	46.7	0	105.06	21927000000	1.68858	1.45744	1.63208	1.94516	1.90149	1.84567	1.2873	1.30772	1.20439	1.44843	1.57449	1.46011	0.879	0.817132	0.871055	0.862511	0.864414	1.00274	-1.29152	-1.46845	-1.52176	-1.36628	-1.32572	-1.53128		1.30184	0.30474		1.67851	0.227874		0.476048	0.0541588		0.211553	0.0693242	+	5.47794	3.04487	+	3.28399	0.736972
IDH1	Isocitrate dehydrogenase [NADP] cytoplasmic		19	49	0	70.746	10023000000	0.558758	0.854395	0.668028	0.738984	0.966578	0.811964	0.925012	0.701682	0.458802	0.731444	0.284159	0.809332	0.610133	0.583519	0.56774	0.668755	0.751207	0.861241	0.267596	0.126048	0.354114	0.195221	0.121546	0.187641		1.75009	0.145449		0.130793	-0.0868537		0.902326	0.17327		0.10183	-0.0328667	+	1.88998	0.468599		0.539725	0.106596
ARL6IP5	PRA1 family protein 3		4	24.5	0	34.995	2992900000	0.302992	0.16221	0.266277	0.662297	0.613155	0.264356	0.308361	0.260026	0.329181	0.172103	0.304511	0.410884	0.129481	0.196733	0.372618	0.624803	NaN	0.324696	-1.30579	-1.4568	-1.3039	-1.33719	-1.01133	-1.16214		0.719869	0.269443		0.0155789	-0.0033564		0.250726	0.2237		1.37516	0.206214	+	4.8639	1.60979		0.0443077	0.0108823
ATP5H	ATP synthase subunit d, mitochondrial		14	72.7	0	96.241	35422000000	-0.374673	-0.404401	-0.371422	-0.249531	-0.420067	-0.420202	-0.430003	-0.391626	-0.413365	-0.444694	-0.448233	-0.369371	-0.375422	-0.486489	-0.441889	-0.389338	-0.416808	-0.390907	0.273098	0.238175	0.228234	0.245374	0.0903115	0.311968		0.13027	0.0202323		0.105354	-0.00910118		0.529761	0.0355823		0.0623825	-0.0121352	+	6.13521	-0.62076		0.685009	0.0511011
FLOT1	Flotillin-1		8	43.3	0	61.527	5461300000	0.439464	0.346191	0.243791	1.68858	1.97966	2.17053	0.680144	0.880098	1.45628	1.44377	1.85188	1.61513	1.64805	1.33199	1.02574	NaN	2.18005	2.00396	0.878372	-0.22393	-0.0267929	-0.225818	0.405775	0.561302	+	1.83415	1.60311		0.912478	0.631419		1.34393	0.913143		1.24289	0.773996	+	2.35058	0.501995	+	2.20615	-0.992112
GLRX3	Glutaredoxin-3		6	25.4	0	71.312	3999800000	-0.254031	-0.577552	-0.380935	-0.262486	NaN	-0.395739	-0.325232	0.168642	-0.225531	-0.238885	0.0473989	-0.0278956	-0.0246633	0.223917	0.0977456	-0.0558912	-0.0711029	-0.0356383	-0.124896	-0.0445384	-0.105908	-0.181591	-0.475134	-0.239805		0.770443	-0.0116296		0.207436	0.0542466		0.734783	-0.15321		0.632313	-0.169266	+	1.34406	-0.293493	+	1.88134	-0.503172
SRP72	Signal recognition particle subunit SRP72		8	17.4	0	27.946	938590000	0.541317	0.444243	0.546265	NaN	NaN	0.24817	NaN	-0.288805	NaN	NaN	NaN	0.395611	-0.125762	0.0113525	NaN	NaN	NaN	NaN	-0.123827	NaN	-0.0989072	-0.339327	0.466027	0.119423		0	-0.298094		0	NaN		0	NaN		1.18178	0.511842	+	2.283	0.729725	+	2.46782	0.567813
TOMM70A	Mitochondrial import receptor subunit TOM70		12	26	0	37.035	6162900000	0.345056	0.397365	0.463204	0.333767	0.392317	0.455965	0.146525	0.268794	0.221073	0.118626	0.202386	0.346078	0.155361	0.211884	0.153676	0.166715	0.274053	0.219215	0.147567	0.0567222	-0.0532093	0.0738203	0.0291349	0.136848		1.3003	-0.00785829		0.0569253	0.0102327		0.927543	0.0463542		1.96861	0.0787388	+	2.69795	0.376097	+	2.3644	0.228235
GLS	Glutaminase kidney isoform, mitochondrial		14	35.1	0	97.269	6948500000	0.557974	0.518535	0.638305	0.638305	0.669118	0.90912	0.588133	0.712552	0.715015	0.462785	0.816067	0.708584	0.405339	0.725959	0.502942	0.655627	0.652876	0.799751	0.410015	0.557778	0.465609	0.327457	0.635801	0.677801		1.02193	0.167243		0.0459001	-0.0094208		0.512462	0.158005		0.315726	0.124258		0.735222	0.121323		0.0948222	0.0268582
RTN3	Reticulon-3;Reticulon		3	27.5	0	21.473	20484000000	1.66294	1.50741	1.98699	2.04792	1.9241	1.96997	0.906506	1.44186	1.42094	0.931607	1.20752	1.31997	0.810073	0.902498	0.397146	1.11096	0.667756	1.11603	-1.7575	-1.74817	-1.36149	-1.78334	-1.65127	-1.70759		0.695026	0.26155		0.520749	-0.103404		0.353472	0.261679		0.2444	-0.0744562	+	4.16736	3.35011	+	2.07509	1.01588
LETM1	LETM1 and EF-hand domain-containing protein 1, mitochondrial		7	14.2	0	19.937	1364000000	0.277866	0.566474	0.577828	0.313014	0.393416	0.236462	0.0646069	0.117961	-0.153415	NaN	0.283922	-0.0500543	-0.420221	-0.3209	NaN	-0.0559962	NaN	-0.0498601	0.636079	0.488309	0.491904	0.354903	0.181548	0.329181		0.552791	-0.159759		0.837455	0.134661		0	0.364225		0.164566	-0.0627697		0.0961065	0.0290168	+	2.11165	0.844617
LUC7L3	Luc7-like protein 3		20	44	0	323.31	26133000000	-0.495695	-0.650159	-0.785328	-0.328634	-0.44605	-0.432435	0.402286	1.18263	1.11177	0.760689	1.06032	0.911193	1.06791	0.754973	1.23383	0.752492	0.880568	0.976804	0.715893	0.517628	0.490057	0.370722	0.437973	0.807685		1.29118	0.241354		0.0213009	0.0118422		0.404348	-0.14895		0.519349	0.194381	+	3.50196	-1.1032	+	3.27916	-1.66263
VAPB	Vesicle-associated membrane protein-associated protein B/C		4	23.9	0	4.756	800380000	NaN	NaN	NaN	NaN	NaN	NaN	NaN	NaN	0.28155	0.123269	NaN	NaN	NaN	-0.02869	0.0209111	0.343465	0.0817487	0.369941	-0.245814	-0.362251	-0.148801	-0.0508611	0.0633648	-0.0786856		-4.34e-08	0		0	NaN		0.51583	0.229734		0.54187	0.100259		0	NaN		0	NaN
PGLS	6-phosphogluconolactonase		8	48.4	0	45.326	3394000000	NaN	-0.134746	0.0617071	0.0669503	-0.0182058	0.201885	-0.0858948	0.0712136	-0.0465932	-0.398056	-0.113926	-0.454071	-0.384113	-0.309002	-0.508834	-0.378701	-0.0992008	-0.698576	-0.255236	-0.671278	-0.276433	-0.483783	-0.480841	0.010923		1.2332	0.128359		1.36959	-0.301593		0.0231816	0.0084905		0.399608	0.235447	+	1.1247	0.440645	+	1.39376	0.36413
SMC2	Structural maintenance of chromosomes protein 2		6	5.8	0	6.7211	539120000	NaN	NaN	NaN	NaN	NaN	NaN	NaN	NaN	-0.603358	NaN	NaN	NaN	NaN	NaN	NaN	NaN	NaN	NaN	0.0513026	NaN	NaN	-0.0249275	0.601411	NaN		-4.34e-08	0		0	NaN		-4.34e-08	0		0	NaN		0	NaN		-4.34e-08	0
LYPLA2	Acyl-protein thioesterase 2	+	2	19	0	22.669	821130000	NaN	NaN	NaN	NaN	NaN	NaN	NaN	0.486148	NaN	NaN	NaN	NaN	NaN	NaN	NaN	NaN	NaN	NaN	NaN	0.517024	0.834792	0.285935	NaN	NaN		-4.34e-08	0		0	NaN		-4.34e-08	0		0	NaN		0	NaN		-4.34e-08	0
IPO7	Importin-7		24	30.7	0	199.94	40032000000	0.730749	0.644318	0.899098	0.752406	0.773659	0.830904	0.566572	0.639695	0.507211	0.46069	0.513693	0.442439	0.443607	0.475189	0.41511	0.414027	0.435735	0.503756	-0.161024	-0.0340717	-0.134841	-0.175208	-0.0772236	-0.13223		0.169688	0.0276015		1.49982	-0.0988852		0.051407	0.00653774		0.0478407	-0.00878569	+	3.27947	0.872762	+	1.82159	0.31342
AHSA1	Activator of 90 kDa heat shock protein ATPase homolog 1		10	37.6	0	45.984	3590200000	0.143394	-0.259824	0.248778	0.139469	0.0829751	0.111165	-0.302564	0.282143	-0.0619777	-0.0144996	NaN	0.618333	0.286645	NaN	0.191689	0.371726	0.0892269	0.294665	-0.259357	-0.293023	-0.366188	-0.416423	-0.267548	-0.373608		0.164026	0.0670874		0.61082	0.484187		1.219	0.0940287		0.988439	0.0583735	+	1.18994	0.40266		0.389447	-0.195051
PSMG1	Proteasome assembly chaperone 1		2	9.7	0	14.32	1615600000	NaN	0.321582	0.110631	NaN	0.227002	0.197614	NaN	-0.0440326	0.102591	0.194591	0.552967	NaN	NaN	0.0768327	0.33182	NaN	NaN	-0.162719	0.161565	0.0951818	0.290896	0.12618	0.276556	0.319618		0.011718	-0.00379834		0	0.597		0	-0.494539		0.510482	0.0818272		0.148535	0.0453535		0.0224026	0.0117798
FMNL1	Formin-like protein 1	+	4	4.9	0	6.3697	303630000	NaN	-1.19628	NaN	NaN	NaN	NaN	-0.431423	0.0436244	-0.311972	NaN	NaN	NaN	NaN	0.287827	NaN	NaN	NaN	NaN	NaN	NaN	NaN	NaN	NaN	NaN		0	NaN		0	NaN		0	NaN		-4.34e-08	0		0	NaN		0	-1.4841
ACSL3	Long-chain-fatty-acid--CoA ligase 3		27	55.4	0	167.37	20335000000	0.928655	0.736388	0.999351	0.977463	1.03048	0.977976	-0.26675	-0.307501	-0.29814	-0.35032	-0.370135	-0.211648	-0.213103	-0.360323	-0.290462	-0.289545	-0.337503	-0.301941	-1.00274	-0.918824	-0.839673	-0.858881	-0.887553	-0.974121		0.421471	0.107174		0.127398	-0.019904		0.272737	-0.0217004		1.2876	-0.0823463	+	4.55329	1.76059	+	3.71606	1.17609
OXSR1	Serine/threonine-protein kinase OSR1		7	15.9	0	32.307	1845700000	-0.106824	-0.0297501	-0.0547069	0.112767	0.0567222	-0.141207	NaN	-0.148561	NaN	0.151079	NaN	NaN	-0.408244	0.207893	0.315914	0.117562	NaN	NaN	-0.167442	-0.186459	-0.0161034	-0.115769	-0.0914484	-0.0650231		0.304801	0.0731876		0	NaN		0	0.525806		0.0153482	-0.00186062		0.319109	0.0423502		0.17055	-0.102281
HSPA4L	Heat shock 70 kDa protein 4L		13	26.8	0	28.928	2287100000	-0.0906954	-0.415653	-0.158961	-0.324925	NaN	0.0124972	-0.282842	-0.0404672	NaN	-0.568281	NaN	-0.200067	0.19774	-0.00630393	NaN	NaN	NaN	0.507414	-0.433584	-0.235705	-0.536775	-0.558538	-0.246276	-0.385545		0.0446626	-0.0313857		0	-0.285438		0	NaN		0.215702	0.0885377		0.704832	0.221903		0.912527	-0.317488
AP2A1	AP-2 complex subunit alpha-1		10	14.2	0	15.055	985990000	NaN	-0.0675004	NaN	NaN	0.210389	0.177216	NaN	0.832363	0.481299	NaN	NaN	NaN	0.424815	NaN	NaN	NaN	NaN	NaN	0.0787465	NaN	0.0969364	NaN	0.0922074	NaN		0	0.277889		0	NaN		0	NaN		0	-0.00472903		0	-0.164437		0	-0.492315
TMEM50A	Transmembrane protein 50A		5	25.5	0	12.386	3879400000	0.829363	0.790605	0.796764	0.929337	0.897163	0.804797	-0.0263226	0.1149	0.107688	0.121148	-0.0754744	-0.0136401	1.04215	0.823994	0.975997	0.809579	NaN	0.81926	1.53302	1.81656	1.56472	1.62938	1.39105	1.73405		0.81402	0.0715216		0.188184	-0.0547439		0.91194	-0.194656		0.380804	-0.117514	+	3.45767	-0.864642		1.01305	-0.141804
BAG2	BAG family molecular chaperone regulator 2		7	53.6	0	14.159	2656900000	-0.249136	-0.840939	-2.1756	NaN	NaN	NaN	-0.0847621	NaN	NaN	NaN	NaN	NaN	NaN	NaN	NaN	NaN	NaN	NaN	-0.375122	-0.547447	-0.611733	-0.0874575	-0.325973	-0.131045		0	NaN		0	NaN		-4.34e-08	0		0.53926	0.138166		0.494951	-0.673012		0	NaN
AIFM1	Apoptosis-inducing factor 1, mitochondrial		28	56.6	0	216.55	32161000000	2.58181	2.93172	2.58048	2.70257	2.69064	2.43906	2.65828	2.32562	2.19824	2.74713	2.34238	1.76388	2.30752	2.06316	2.2294	2.02276	2.27041	2.33783	-1.70849	-1.55377	-1.54477	-1.68734	-1.49985	-1.74492		0.297847	-0.0872464		0.242449	-0.109582		0.0215624	0.0103052		0.36136	-0.0557975	+	5.35923	4.29329	+	1.65339	0.497979
CLDN1	Claudin-1		5	27.5	0	38.406	4096600000	1.28232	1.47275	1.40289	1.52281	1.20088	1.17428	-0.091141	-0.0226688	-0.22238	-0.262002	-0.542879	-0.479593	0.406319	1.10178	1.28576	1.17069	0.706022	0.626112	2.80727	2.84328	3.11871	2.55321	2.43654	2.09234		0.187035	-0.086662		1.02233	-0.316094		0.0731139	-0.0970108		0.759634	-0.393017	+	2.96306	-1.45242		0.765066	0.454698
FADS2	Fatty acid desaturase 2		12	34.5	0	42.301	11990000000	2.1798	2.37434	3.06972	2.29311	2.78599	2.59753	0.908505	0.782912	1.05797	0.941707	0.611739	0.555129	-1.30839	-1.30486	-1.42434	-1.56158	-1.46502	-1.55847	-0.663168	-0.665203	-0.660475	-0.708184	-0.585994	-1.08804		0.0212969	0.0175885		0.515926	-0.213604		1.4313	-0.182494		0.261562	-0.101113	+	3.54408	3.21924	+	3.85015	3.88715
CLPTM1	Cleft lip and palate transmembrane protein 1		6	12.4	0	16.021	1461900000	0.581496	NaN	0.392757	NaN	0.884559	0.376846	NaN	-0.222683	-0.254909	-0.177457	NaN	0.0661237	-0.759502	NaN	-0.902875	-0.0946491	-0.0609841	-0.338451	-0.769428	-0.921199	-0.25991	-0.597824	-0.415172	-0.275035		0	-0.015911		0	0.321033		1.28487	0.614639		0.278914	0.106432	+	1.61235	1.0801	+	2.09776	1.31832
TOMM40	Mitochondrial import receptor subunit TOM40 homolog	+	9	41.3	0	118	6800500000	0.0697022	0.0801119	-0.116567	0.182947	-0.83797	0.0761487	-0.1005	-0.0234604	-0.301337	0.132116	0.164915	0.0267293	-0.41754	-0.0507714	-0.0279838	-0.0835692	0.0060466	-0.193156	-0.44087	-0.603665	-0.643383	-0.907062	-0.388148	-0.494719		0.203437	-0.204041		1.58192	0.249686		0.184168	0.0752055		1.20204	0.276791	+	2.50382	0.729119		0.552515	0.176514
LDHA	L-lactate dehydrogenase A chain	+	30	88.6	0	323.31	379440000000	-0.0913562	-0.13095	-0.157013	-0.0797219	-0.0568063	-0.0674852	-0.362696	-0.374561	-0.40591	-0.295712	-0.303561	-0.325105	-0.25379	-0.305485	-0.327511	-0.247012	-0.25202	-0.274041	-0.425695	-0.419256	-0.471529	-0.46347	-0.398779	-0.435515		0.874093	0.0584352		2.50129	0.0729294		0.868981	0.0379049		0.517061	0.0314221	+	3.68992	0.324978		2.36542	0.169156
GLUD1	Glutamate dehydrogenase 1, mitochondrial		3	15.5	0	13.877	1451900000	NaN	NaN	0.979513	-0.585929	0.183836	0.0382958	-0.302742	0.128029	-0.282351	0.386149	NaN	NaN	-1.03027	0.331132	-0.269251	NaN	-0.190405	-0.679712	0.0829751	-0.618606	0.750778	-0.0383618	-0.0117916	0.927593		0	-0.941217		0	0.688891		1.12196	-0.465998		0.19985	0.301655		0	0.948243		0	1.30231
DHFR	Dihydrofolate reductase		18	85	0	144.17	100940000000	3.11721	3.18967	3.48852	3.55741	3.64628	3.47819	3.2277	3.91342	4.01507	4.05615	2.49442	3.72028	3.12136	3.96495	3.6397	3.79254	4.10585	3.93857	-1.6878	-1.67669	-1.6448	-1.71009	-1.63958	-1.75229		0.714126	0.295496		0.158761	-0.295112		0.845804	0.370315		0.433814	-0.0160282	+	5.75355	4.94233		0.50081	-0.310206
CYB5R3	NADH-cytochrome b5 reductase 3;NADH-cytochrome b5 reductase 3 membrane-bound form;NADH-cytochrome b5 reductase 3 soluble form	+	19	81.3	0	278.99	79913000000	-0.803972	-0.862391	-0.749621	2.23521	2.6287	2.54117	-0.548248	-0.578456	-0.497343	2.51018	2.31368	2.27077	0.280481	0.0797024	0.0863761	2.31889	2.35239	2.28644	1.97512	-0.542101	-0.515006	-0.536022	1.89321	1.83972	+	2.79831	3.27369	+	3.07759	2.90622	+	2.99305	2.17039	+	3.51013	2.43372	+	2.91254	-0.274285	+	3.69329	-0.954181
GSR	Glutathione reductase, mitochondrial		19	58.7	0	253.19	21478000000	1.21201	1.15387	0.958805	1.12783	0.93138	1.07704	0.185867	0.246469	0.228234	-0.0202673	0.192447	-0.118931	0.280362	-0.0269398	0.232784	0.266157	0.155231	0.0875986	-1.33047	-1.25023	-1.33464	-1.50202	-1.46897	-1.41762		0.228813	-0.0628117		0.856294	-0.20244		0.0251916	0.00759349		0.238612	-0.0433869	+	4.68934	2.47053	+	2.82147	0.94616
MT-CO2	Cytochrome c oxidase subunit 2		5	23.8	0	15.943	4415900000	0.134747	-0.23382	-0.139633	-0.249376	0.128294	0.0277203	NaN	-0.605222	-0.470269	-0.744584	NaN	-0.611799	-0.994758	-1.17043	-1.29149	-1.09292	-1.03265	-1.26354	-0.757355	-0.836888	-0.787866	-0.718949	-0.699279	-0.905467		0.0713622	0.0484481		0	-0.14153		0.112076	0.0225164		0.0213641	-0.00613242	+	2.42759	0.701665	+	2.80519	1.07265
PNP	Purine nucleoside phosphorylase		14	64	0	116.93	12449000000	0.122474	0.18409	-0.0592694	0.143394	0.0771063	0.0724488	-0.0878101	-0.0433486	0.0731348	0.0939657	-0.034574	0.273098	-0.0215407	-0.0298237	0.00432164	0.181039	0.146916	0.198117	-0.366913	-0.397543	-0.423565	-0.515542	-0.487156	-0.569179		0.0727141	0.015218		0.779574	0.130171		2.80327	0.191038		0.360496	-0.0288662	+	2.53674	0.527982		0.594671	0.0981124
HPRT1	Hypoxanthine-guanine phosphoribosyltransferase		8	43.6	0	25.461	6016800000	-0.336519	-0.227067	-0.536022	-0.145015	-0.131013	-0.291186	-0.284792	-0.211448	-0.239856	-0.302671	-0.305681	-0.404936	-0.109421	-0.153655	0.143916	-0.481626	-0.300537	-0.443634	0.207143	0.243669	0.187134	0.134089	0.171975	0.116098		1.25802	0.177465		0.791118	-0.0923975		0.994781	-0.368879		1.13019	-0.0232252	+	2.35452	-0.554833		1.1863	-0.326816
GOT2	Aspartate aminotransferase, mitochondrial		18	47	0	66.828	8683600000	-0.478869	-0.489666	-0.448902	-0.585713	-0.575056	-0.460707	-0.707878	-0.755332	-0.576002	-0.839518	-0.445342	-0.441321	-0.52048	-0.409355	-0.572995	-0.68959	-0.638658	-0.44091	0.257131	0.116365	-0.152211	0.0318186	0.101247	0.0729976		0.848014	-0.0680131		0.299526	0.104343		0.292111	-0.0887763		0.849056	0.145135	+	2.37697	-0.471136		0.223383	0.028464
PGK1	Phosphoglycerate kinase 1		28	83.7	0	323.31	307540000000	0.623118	0.595599	0.543595	0.556209	0.646439	0.634779	0.285343	0.35682	0.340733	0.377734	0.345964	0.399554	0.316262	0.269871	0.25544	0.43328	0.333996	0.354903	-0.668318	-0.6446	-0.61553	-0.6878	-0.657263	-0.66068		0.186913	0.0250384		0.578819	0.0467855		1.57584	0.0935355		0.222866	-0.0127771	+	5.60647	1.23675	+	3.30724	0.306913
AK1	Adenylate kinase isoenzyme 1		5	28.6	0	20.989	2257900000	-0.375534	-0.224688	-0.216937	-0.614359	-0.202356	NaN	-0.229738	-0.11724	-0.1849	NaN	0.0126402	-0.116332	-0.0985055	-0.0212479	-0.310737	-0.242857	-0.432124	-0.221892	-0.169193	-0.321928	-0.355147	-0.231007	-0.414711	-0.347289		0.252311	-0.108247		0.719498	0.0992238		0.404306	-0.155461		0.0298321	-0.00770344		0.181492	0.0303075		0.568572	-0.12889
HRAS;NRAS;KRAS	GTPase HRas;GTPase HRas, N-terminally processed;GTPase NRas;GTPase KRas;GTPase KRas, N-terminally processed		2	15.3	0	4.381	305270000	0.647913	NaN	NaN	NaN	NaN	0.555522	NaN	0.292193	NaN	NaN	NaN	NaN	NaN	0.412944	NaN	NaN	NaN	NaN	0.36614	NaN	0.902344	NaN	NaN	0.59321		0	NaN		0	NaN		0	NaN		0	NaN		0	-0.254431		0	0.234969
LMNA	Prelamin-A/C;Lamin-A/C		0	45.5	0	96.224	5970100000	0.731618	0.914718	0.382723	0.525568	0.444243	0.953004	0.373954	-0.220564	0.420725	0.376624	0.454597	0.178746	0.0551957	0.00360232	0.0824301	0.41186	0.188401	-0.0244725	-0.885207	-0.93589	-1.19182	-1.3171	-0.991542	-0.937408		0.0361758	-0.0354142		0.187658	0.145284		0.401841	0.144853		0.80228	0.210219	+	3.16317	1.82462	+	1.78848	0.629277
TFRC	Transferrin receptor protein 1;Transferrin receptor protein 1, serum form		41	55.5	0	323.31	313250000000	0.445939	0.461109	0.445409	0.518535	0.417272	0.549226	-0.765302	-0.857521	-0.82082	-0.888648	-0.815529	-0.842853	-0.064329	-0.0985982	-0.0702393	0.0576928	-0.119463	-0.0679842	1.3662	1.30685	1.34812	1.31435	1.2916	1.28641		0.367536	0.0441919		0.260977	-0.0344621		0.285852	0.0344706		0.0795635	-0.00836841	+	6.43863	-0.872285	+	5.83357	0.528541
FTH1	Ferritin heavy chain;Ferritin heavy chain, N-terminally processed;Ferritin		3	16.9	0.00055897	3.1229	480000000	-0.0455207	NaN	NaN	NaN	0.475085	0.506805	NaN	NaN	0.153935	-0.283474	NaN	-0.0144122	-0.0935865	NaN	NaN	-0.357326	-0.132973	NaN	0.815083	0.812046	0.757535	NaN	NaN	0.88276		0	NaN		0	-0.168347		0	-0.26374		0	0.00303716		0	-0.830312		0	0.0480658
CAT	Catalase		13	35.1	0	54.893	4131100000	1.26297	1.12955	0.993711	1.60815	NaN	0.938173	0.710702	0.258579	0.777367	0.588421	0.0316775	0.767824	0.334683	0.253505	0.042084	0.208767	-0.238562	0.245252	-0.737735	-1.10374	-1.06272	-0.946499	-0.708184	-0.862838		0.220721	0.144817		0.705467	-0.119575		0.250103	-0.138271		0.996311	0.268065	+	4.73598	2.16639	+	2.84976	0.918653
ALDOA	Fructose-bisphosphate aldolase A;Fructose-bisphosphate aldolase		0	88.7	0	323.31	181780000000	-0.283492	-0.398227	-0.349732	-0.340861	-0.359971	-0.371366	-0.298762	-0.274215	-0.311041	-0.206079	-0.262192	-0.177947	-0.191096	-0.222801	-0.21744	-0.188874	-0.163979	-0.238681	-0.107057	-0.147937	-0.138791	-0.158397	-0.0488748	-0.0797067		0.171038	-0.0135826		0.807452	0.0792664		0.198752	0.0132679		1.37387	0.0698289	+	2.35543	-0.195442		1.73647	-0.133371
ANXA1	Annexin A1		27	75.1	0	276.78	76230000000	0.228973	0.22033	0.274053	0.141564	-0.038599	0.234624	0.28948	0.115566	0.293959	0.379066	0.358509	0.179384	0.139469	0.0894982	0.142871	0.222063	0.231187	0.280719	-0.483158	-0.514346	-0.440518	-0.514326	-0.431092	-0.457732		0.713615	-0.128589		0.255247	0.0726512		1.61778	0.12071		0.852111	0.0324027	+	4.79015	0.730849		2.09025	0.117172
NR3C1	Glucocorticoid receptor		10	18.6	0	28.063	1095100000	NaN	NaN	0.777283	NaN	NaN	NaN	NaN	0.51339	0.215989	NaN	NaN	NaN	0.409255	NaN	NaN	NaN	NaN	NaN	-0.745527	-1.03582	-0.854153	-0.97943	-0.779348	-0.939399		0	NaN		0	NaN		0	NaN		0.644721	0.135042		0	1.73375		0	0.368028
OAT	Ornithine aminotransferase, mitochondrial;Ornithine aminotransferase, hepatic form;Ornithine aminotransferase, renal form		3	12.3	0	8.1522	1125600000	-0.117333	NaN	NaN	-0.71196	-0.927442	-0.410486	NaN	-0.80289	NaN	-0.495003	-1.1676	-0.58528	-0.846532	NaN	NaN	NaN	NaN	-0.663694	-0.198063	0.268913	0.121413	0.29901	-0.286744	-0.0889297		0	-0.594627		0	-0.364715		0	NaN	+	2.50097	-0.421025		0	-0.347112		0	0.729198
TUBB4A	Tubulin beta-4A chain		1	59.9	0	47.815	17801000000	0.000865329	0.235482	0.273934	0.508834	0.377512	0.397913	-0.0240177	0.0557509	-0.0476963	-0.117114	-1.32807	-0.0163077	0.0299829	0.125387	0.0381553	0.331705	-0.0549317	-0.135554	-0.370974	-0.452985	-0.315648	-0.33348	-0.420202	-0.420299		0.756275	0.257993		0.399661	-0.481844		0.0348087	-0.0174352		0.220252	-0.0364542	+	2.30768	0.537464		0.510351	0.105585
GAPDH	Glyceraldehyde-3-phosphate dehydrogenase		16	55.5	0	323.31	275030000000	-0.203087	-0.297023	-0.289263	-0.279371	-0.171466	-0.258287	-0.237796	-0.186213	-0.202124	-0.126266	-0.169453	-0.0808659	-0.127368	-0.0688313	-0.11591	-0.116254	-0.0708756	-0.00917584	0.295253	0.240742	0.22132	0.262433	0.110497	0.221073		0.160258	0.0267496		0.886151	0.0831827		0.423577	0.0386014		0.246387	-0.0325576	+	4.00551	-0.504623		1.97951	-0.159088
HSPB1	Heat shock protein beta-1		13	81.5	0	129.02	38120000000	0.348346	0.272023	0.218967	0.139993	0.306729	0.363788	0.335369	0.223917	0.441165	0.31823	0.53655	0.361993	0.522257	0.508023	0.552771	0.561497	0.53097	0.340505	-0.565374	-0.555163	-0.563667	-0.475756	-0.49983	-0.521059		0.0291813	-0.00960869		0.212341	0.0721076		0.221236	-0.0500259		0.0272738	0.00277424	+	4.18585	0.811308	+	2.47056	-0.247905
TYMS	Thymidylate synthase		3	11.8	0	5.4034	1170800000	NaN	NaN	NaN	NaN	NaN	NaN	NaN	NaN	NaN	NaN	NaN	NaN	NaN	NaN	NaN	NaN	NaN	NaN	-0.820234	-0.820565	-0.184293	NaN	NaN	-0.439813		-4.34e-08	0		-4.34e-08	0		-4.34e-08	0		0	0.000331163		0	NaN		-4.34e-08	0
RPN1	Dolichyl-diphosphooligosaccharide--protein glycosyltransferase subunit 1		20	40.2	0	98.714	14730000000	0.735436	0.833174	1.03527	0.789187	0.728225	0.531569	-0.0646157	0.179638	-0.285337	-0.0147473	0.0953169	0.226015	-0.102434	0.00834347	-0.30438	0.0835197	0.189793	-0.128409	0.123799	0.0183493	0.189034	0.0405417	0.103128	0.0224743		0.419407	-0.184967		0.326825	0.158966		3.59546	0.181125		0.00270648	0.000492133	+	2.79457	0.785319	+	2.85089	1.00078
RPN2	Dolichyl-diphosphooligosaccharide--protein glycosyltransferase subunit 2		12	31.9	0	42.516	4754500000	0.277628	0.257373	0.659285	0.383276	0.513794	0.409798	0.560519	0.143655	-0.0551715	0.385707	0.149519	0.147958	0.213627	-0.253034	-0.0145433	-0.0602168	-0.0174025	-0.0236803	-0.160186	-0.306859	-0.176495	-0.178502	-0.0232697	-0.262261		0.0831478	0.0375274		0.0332119	0.011394		0.0341622	-0.0157833		0.34409	0.0720464	+	1.9639	0.618714		1.0411	0.416079
GNAI2	Guanine nucleotide-binding protein G(i) subunit alpha-2	+	10	58.9	0	126.36	21306000000	-1.00228	-0.966771	-1.00061	0.983532	0.86584	0.928655	-0.55385	-0.542647	-0.384584	1.16137	0.979806	0.880176	0.825297	0.617298	0.820812	1.85758	1.74287	1.95207	1.92911	0.338909	0.432852	0.335483	1.85256	2.04813	+	3.26394	1.91589	+	2.12641	1.50081	+	3.06786	1.09637	+	2.53774	1.57418	+	5.63398	-1.35897	+	4.82339	-1.74436
ATP1A1	Sodium/potassium-transporting ATPase subunit alpha-1		16	34	0	178.61	22720000000	0.685267	0.644595	0.690372	0.568324	0.742265	0.615793	0.465609	0.375512	0.453965	0.317072	0.363676	0.420509	0.240131	0.331017	0.251325	0.343578	0.345056	0.239154	0.097476	0.228603	0.193961	0.284277	0.160791	0.0447438		0.16712	-0.0312842		0.573122	-0.0646095		0.375215	0.0351047		0.816922	-0.13461	+	3.89021	0.437798	+	3.62092	0.399254
ALDH2	Aldehyde dehydrogenase, mitochondrial		5	17.2	0	4.1387	343560000	NaN	NaN	NaN	NaN	NaN	NaN	NaN	NaN	NaN	NaN	NaN	NaN	NaN	NaN	NaN	NaN	NaN	NaN	0.196607	NaN	-0.325738	0.457647	0.18574	NaN		-4.34e-08	0		-4.34e-08	0		-4.34e-08	0		0	0.511478		0	NaN		-4.34e-08	0
SLC25A5	ADP/ATP translocase 2;ADP/ATP translocase 2, N-terminally processed		8	45.6	0	83.107	47046000000	1.75009	1.89231	1.87892	1.32648	2.0403	1.95918	1.30147	1.16993	1.1595	1.2455	1.29255	1.39155	0.951812	0.992478	1.01128	1.0999	1.02772	1.15769	-1.18988	-1.1974	-1.09363	-1.16249	-1.09468	-1.26437		0.123468	-0.0651247		0.446869	0.0995647		1.006	0.109914		0.336443	-0.0318016	+	6.17652	2.99162	+	4.21232	0.855252
PCCA	Propionyl-CoA carboxylase alpha chain, mitochondrial		32	54.7	0	73.028	23362000000	-3.63206	-4.08971	-3.0468	-3.92054	-3.66447	-3.99558	-3.41206	-3.53323	-3.75152	-3.10557	-3.37759	-4.32103	-3.67689	-3.20343	-3.307	-3.17932	-4.01912	-3.7452	-2.43448	-3.36523	-2.74778	-2.27244	-2.78797	-2.21759		0.247565	-0.270672		0.0424917	-0.0357966		0.233146	-0.252106		0.38183	0.315136	+	0.843444	-0.794374		0.226754	-0.193747
ALPL	Alkaline phosphatase, tissue-nonspecific isozyme		4	8.8	0	10.521	510980000	NaN	NaN	NaN	-0.989134	-1.65672	NaN	NaN	NaN	NaN	-1.49208	NaN	-1.34898	NaN	NaN	NaN	NaN	NaN	NaN	NaN	-1.99729	-1.75906	-1.72404	-1.99108	-2.17514		0	NaN		0	NaN		-4.34e-08	0		0.704275	-0.341562		0	NaN		-4.34e-08	0
EIF2S1	Eukaryotic translation initiation factor 2 subunit 1		14	54.9	0	110.05	6042900000	-0.135428	-0.111586	-0.0410905	-0.288998	-0.188447	-0.12945	-0.0117916	0.0923428	0.0985544	0.0430645	NaN	0.531469	-0.0402595	0.102053	0.667302	0.102322	0.267236	0.0871912	-0.351351	-0.388658	-0.277971	-0.257287	-0.329468	-0.399274		1.32799	-0.106264		0.377	0.243885		0.127084	-0.090782		0.376313	-0.0520588	+	1.8872	0.211937		0.710598	-0.339067
RPLP1	60S acidic ribosomal protein P1		3	89.5	0	75.012	18140000000	-0.58827	-0.515274	-0.597169	-0.407325	-0.435007	-0.761702	0.0526941	0.0517201	-0.366913	NaN	-0.578736	-0.274494	-0.43154	-0.310254	-0.461879	-0.263854	0.095722	0.468114	-0.397581	-0.246892	-0.205763	-0.537152	-0.106187	-0.328236		0.106154	0.0322259		0.227193	-0.269019		0.807085	0.501218		0.17386	0.0526009		1.0356	-0.236969		1.44974	-0.16568
RPLP2	60S acidic ribosomal protein P2		6	91.3	0	40.051	3988700000	-0.41625	-0.59826	-0.295217	-0.442732	-0.747512	-0.499198	-0.624177	-1.24233	NaN	-0.59826	-1.18705	-0.22825	-0.793957	-0.527783	-0.816799	-0.808463	NaN	-0.592093	-1.42814	-1.44705	-1.45261	-1.41854	-1.4489	-1.48564		0.862135	-0.126572		0.655798	0.0405971		0.266771	0.105101		0.199169	-0.0148257	+	3.45739	1.00283		1.01364	0.276271
RPLP0;RPLP0P6	60S acidic ribosomal protein P0;60S acidic ribosomal protein P0-like		14	53.6	0	92.519	33110000000	-0.238051	-0.141685	-0.0940946	-0.227152	-0.225076	-0.255512	0.0719	0.0608775	-0.0067532	0.0738203	-0.101846	-0.123748	-0.0554263	-0.129213	-0.221236	-0.0634242	-0.142672	-0.166713	-0.0382433	-0.0648269	0.0532504	0.0122111	0.0312541	-0.0752616		0.588329	-0.0779696		0.699472	-0.0925994		0.178188	0.0110222		0.30884	-0.0276285		1.35185	-0.158155		0.130076	-0.0226515
SSB	Lupus La protein		12	32.4	0	32.199	4278800000	-0.189746	-0.345931	-0.274721	-0.213671	-0.198345	-0.231735	0.013498	-0.371292	-0.332607	-0.159009	-0.092894	-0.16537	-0.0362448	-0.0703756	-0.0399629	0.289834	-0.106172	-0.0262786	-0.0523413	0.024887	-0.20073	-0.154731	-0.0150389	-0.137727		0.418461	0.0555491		0.24322	0.0910428		0.332099	0.101322		0.193081	0.0418222		0.906763	-0.159941		2.05246	-0.221272
ITGB1	Integrin beta-1		8	14.7	0	25.135	2628200000	0.599794	0.643764	0.769941	NaN	NaN	0.593975	0.421372	NaN	0.475604	NaN	NaN	NaN	0.206143	NaN	NaN	0.274888	0.475189	NaN	-0.20136	-0.17288	-0.112911	-0.486691	0.100305	-0.0628665		0	-0.175966		0	NaN		0	0.0687448		0.583759	0.202854	+	2.73526	0.92866		0	0.465023
KRT18	Keratin, type I cytoskeletal 18		16	63.3	0	214.85	14505000000	2.48862	2.74831	2.20405	2.28508	2.88033	2.33988	2.06119	1.59698	NaN	2.9799	2.3927	2.82619	2.20877	NaN	1.0352	1.64847	2.04198	1.57236	-1.09517	-1.30522	-1.33464	-1.43846	-1.45111	-1.31534		0.0622529	0.0214376		1.34111	0.857214		0.00587001	-0.0115735		0.27048	0.0722332	+	4.72313	3.83977		0.761782	0.858341
ATP5B	ATP synthase subunit beta, mitochondrial;ATP synthase subunit beta		13	35.9	0	54.296	51075000000	-0.409949	-0.0310171	-0.229399	-0.334316	-0.094033	-0.105892	-0.894402	-0.948335	-0.944971	-1.17195	-1.04516	-0.923085	-0.603117	-2.16333	-0.742603	-0.695489	-0.662437	-0.317948	-0.0261022	-0.164917	-0.165062	-0.12477	-0.325557	-0.401482		0.298949	0.0453746		0.509214	-0.117498		0.491264	0.611059		0.295886	-0.0994642		0.259625	-0.071872	+	0.862254	0.946229
S100A9	Protein S100-A9		3	37.7	0	8.1675	1330200000	NaN	-2.96196	-2.38481	-2.31452	NaN	NaN	NaN	-4.15167	NaN	NaN	NaN	-3.52756	NaN	-2.6092	NaN	-2.45585	NaN	-2.77853	NaN	NaN	NaN	NaN	-1.24705	NaN		0	NaN		0	NaN		0	NaN		0	NaN		0	NaN		0	-0.0641832
S100A6	Protein S100-A6;Protein S100		6	72.2	0	84.887	70484000000	0.172487	0.138683	0.113434	0.0863761	0.041243	0.188401	-0.127337	-0.129529	-0.224081	-0.0835692	-0.209779	-0.0534039	0.1133	-0.0655062	0.0270125	-0.0400815	0.10017	0.0357646	0.36614	0.385486	0.344147	0.371726	0.42191	0.407733		0.234827	-0.0361949		0.221968	0.0447317		0.0240078	0.00701557		0.420842	0.0314748	+	3.37212	-0.225585		1.00586	0.116599
ENO1	Alpha-enolase		27	78.6	0	323.31	386510000000	0.0236102	-0.00591274	-0.0493674	-0.0322707	0.0213375	-0.0208965	-0.0959746	-0.0470403	-0.000764838	0.016211	0.0174944	-0.0108174	0.0200577	-0.0492181	-0.00138564	0.0361869	0.0140695	-0.0149077	0.366364	0.265437	0.285343	0.287827	0.223793	0.269632		0.000586084	-5.32e-05		0.587143	0.0555559		0.366952	0.0219649		0.0468434	0.00706071	+	3.69207	-0.290092		0.00416053	-0.000374643
PYGL	Glycogen phosphorylase, liver form;Alpha-1,4 glucan phosphorylase		8	11.2	0	12.346	1128600000	0.875387	0.328492	NaN	NaN	0.136323	0.342782	NaN	0.379954	NaN	NaN	NaN	NaN	0.270708	0.181166	0.102725	0.0464211	0.252658	-0.116395	0.428035	0.153935	0.340391	0.262313	0.274053	0.0129261		0	-0.192169		0	NaN		0.47843	-0.123972		0.0286484	-0.013875		0.692561	0.349726		0.83738	0.417073
NPM1	Nucleophosmin		14	55.1	0	122.32	48154000000	-0.173205	-0.278076	-0.360712	-0.373757	-0.334771	-0.283193	-0.0664274	0.0877344	-0.117099	0.0236102	-0.13741	-0.0352539	-0.143357	-0.00765207	-0.0493524	-0.0962213	0.012068	-0.0249421	0.0918014	-0.0198138	0.0550568	0.0535284	-0.027175	-0.005623		0.272991	-0.0599092		0.0555949	-0.0177539		1.15823	0.030422		0.0525779	-0.00992267	+	2.13668	-0.300255		1.40757	-0.203877
DKFZp686J1372;TPM3	Tropomyosin alpha-3 chain		5	47	0	44.883	2530400000	0.525768	0.173383	0.533962	0.300534	0.535356	0.380064	NaN	NaN	0.718438	1.09586	NaN	NaN	NaN	0.920446	NaN	NaN	NaN	0.287591	-0.456069	-0.470989	-0.566848	-0.517111	-0.334735	-0.551966		0.00959762	-0.00571967		0	NaN		0	NaN		0.319538	0.070726	+	2.79703	0.929354		0	-0.509408
HIST2H2BE;HIST1H2BB;HIST1H2BO;HIST1H2BJ;HIST1H2BI;HIST1H2BN;HIST3H2BB;HIST1H2BL;HIST1H2BM;HIST1H2BH;HIST2H2BF;HIST1H2BC;HIST1H2BD;H2BFS;HIST1H2BK;HIST1H2BA	Histone H2B type 2-E;Histone H2B type 1-B;Histone H2B type 1-O;Histone H2B type 1-J;Histone H2B;Histone H2B type 3-B;Histone H2B type 1-L;Histone H2B type 1-M;Histone H2B type 1-N;Histone H2B type 1-H;Histone H2B type 2-F;Histone H2B type 1-C/E/F/G/I;Histone H2B type 1-D;Histone H2B type F-S;Histone H2B type 1-K;Histone H2B type 1-A		5	40.5	0	11.691	3096700000	-0.0199454	NaN	-1.1512	-0.344648	NaN	-0.40255	0.408386	-2.19298	-0.339856	NaN	-0.367546	-0.954473	NaN	-0.0733326	NaN	-0.83645	NaN	-1.94364	-0.279441	-0.143484	0.0174944	-0.279739	-0.737038	-0.377426		0.118887	0.211975		0.150729	0.605406		0	NaN		0.581993	-0.329392		0.422999	-0.450331		0	-0.512241
EPHX1	Epoxide hydrolase 1		20	49.2	0	68.561	13087000000	0.945233	0.813935	0.939678	0.945758	0.919149	1.06343	0.171975	0.0518593	0.0760118	0.113567	0.312549	0.251083	0.0490731	-0.0455952	-0.0167893	0.27035	0.274649	0.0511633	0.402722	0.208767	0.320196	0.208018	0.429321	0.393856		0.734456	0.0764982		0.497698	0.125784		0.960642	0.203158		1.57816	0.162973	+	3.48804	0.653955	+	4.21832	0.904053
DBI	Acyl-CoA-binding protein		8	78.2	0	64.258	27621000000	2.14923	2.6184	3.17548	2.09468	2.97697	3.67841	3.6311	1.31881	3.18037	3.09255	2.63671	2.93819	NaN	2.69897	2.45009	3.46793	2.93431	2.87637	-1.30632	-1.29343	-1.31592	-1.34015	-1.44348	-1.26323		0.604415	0.268982		0.104992	0.179053		0.74746	0.330807		0.122252	-0.0211786	+	3.73998	3.9642		0.0632258	0.0731705
LDHB	L-lactate dehydrogenase B chain;L-lactate dehydrogenase		21	61.7	0	215.16	170200000000	0.0604624	0.024036	0.0183493	0.0323829	0.0969364	0.132116	-0.186147	-0.154265	-0.137473	-0.186016	-0.168382	-0.124912	-0.217407	-0.154072	-0.168025	-0.148193	-0.183998	-0.12433	0.0140695	-0.00996002	-0.0468912	0.00216244	-0.0297206	0.0219061		0.472953	0.0528626		0.0193257	-0.000474848		0.346533	0.0276611		2.01962	0.0203146		1.24581	0.0525122	+	3.10812	0.214118
P4HB	Protein disulfide-isomerase		26	58.7	0	178.55	35880000000	-0.110791	-0.175436	-0.145797	-0.254909	-0.31766	-0.181771	-0.40635	-0.412712	-0.506373	-0.419449	-0.371049	-0.386676	-0.649706	-0.587229	-0.595991	-0.578435	-0.617809	-0.597736	0.146655	0.151729	0.230941	0.245374	0.129481	0.173		1.02175	-0.107439		0.483864	0.0494202		0.148659	0.0129823		0.764777	-0.0596361	+	3.2862	-0.353356	+	4.18144	0.466968
CTSD	Cathepsin D;Cathepsin D light chain;Cathepsin D heavy chain		4	11.4	0	9.5137	1087900000	1.77892	0.260267	-0.13787	-0.138124	NaN	0.956949	0.780142	-0.31328	1.04152	NaN	NaN	NaN	NaN	NaN	0.739502	NaN	NaN	1.89325	2.76861	NaN	NaN	NaN	NaN	NaN		0.0807445	-0.411114		0	NaN		0	1.15374		0	NaN		0	NaN		0	-0.105729
ANXA2;ANXA2P2	Annexin A2;Annexin;Putative annexin A2-like protein		34	79.1	0	323.31	380420000000	-0.0679993	-0.112771	-0.115676	-0.132942	-0.111929	-0.170816	0.284751	0.335597	0.5007	0.468427	0.34301	0.317188	0.371391	0.333767	0.40719	0.319849	0.327572	0.352533	-0.351295	-0.311542	-0.334152	-0.324762	-0.313549	-0.327439		0.716797	-0.0397469		0.00737601	0.00252548		0.85646	-0.0374647		0.143232	-0.00727543	+	3.74621	0.22467	+	4.24326	-0.469598
TUBB	Tubulin beta chain		4	65.7	0	158.12	149470000000	0.42191	0.410015	0.455649	0.503959	0.527971	0.549916	0.143132	0.127105	0.151859	0.187388	0.193456	0.226139	0.266877	0.269033	0.254594	0.272143	0.334225	0.314058	-0.141621	-0.0843491	-0.166535	-0.420955	-0.270713	-0.133306		1.945	0.0980904		1.68629	0.0616289		0.819826	0.0433074		0.115825	0.0420666	+	2.51122	0.653138		3.48855	0.16569
PSAP	Prosaposin;Saposin-A;Saposin-B-Val;Saposin-B;Saposin-C;Saposin-D		4	12.4	0.0073064	1.6519	882740000	NaN	NaN	NaN	NaN	NaN	NaN	NaN	NaN	NaN	NaN	NaN	NaN	NaN	NaN	NaN	NaN	NaN	NaN	NaN	NaN	NaN	NaN	-0.174198	-0.561835		-4.34e-08	0		-4.34e-08	0		-4.34e-08	0		0	NaN		-4.34e-08	0		-4.34e-08	0
PFN1	Profilin-1		11	89.3	0	155.39	114040000000	0.00345838	-0.0158409	0.041243	-0.0380656	0.0282862	-0.0865686	0.0434844	0.0271541	0.0177795	0.0380147	0.063779	0.0787465	0.0866479	0.0446039	-0.00050503	0.0746424	0.0100636	-0.00154454	0.0304067	0.0540844	-0.0233138	-0.0365998	0.102457	-0.0251623		0.310753	-0.0417362		0.594519	0.0307074		0.603815	-0.0158618		0.30992	0.0378434		0.129153	0.0115633		0.489178	-0.0339621
APRT	Adenine phosphoribosyltransferase		9	62.8	0	25.05	2428900000	NaN	-0.809979	0.0820213	NaN	NaN	-0.366597	NaN	0.0408223	-0.199255	-0.018235	NaN	-0.00784072	0.260869	-0.218011	-0.30936	NaN	-0.306252	-0.100453	0.0600474	0.226015	NaN	0.865285	-0.00405968	0.176578		0	-0.448618		0	0.191415		0.122379	0.0603326		0.456609	-0.427338		0.621201	-0.909629		0.26439	-0.275145
EPRS	Bifunctional glutamate/proline--tRNA ligase;Glutamate--tRNA ligase;Proline--tRNA ligase		21	18.3	0	57.601	3663700000	0.360083	0.590818	0.354452	0.390998	0.0196308	0.44297	0.184471	0.377957	0.586116	0.475085	0.218843	-0.161492	-0.0109773	0.522357	0.139076	-0.0451635	0.331132	0.378844	-0.274896	0.225892	0.126841	0.436908	-0.190059	-0.10403		0.26011	-0.150585		0.247947	-0.205369		0.011825	0.00478553		1.64945	-0.452875		0.646708	0.171904		0.545707	0.218299
HSP90AA1	Heat shock protein HSP 90-alpha		25	55.7	0	322.61	75392000000	0.0359054	0.0504668	0.0506061	-0.0437797	-0.0480691	-0.0289992	-0.0278514	-0.0684985	-0.0279985	-0.00860964	-0.0779696	0.0097772	0.0207689	0.0319598	-0.0201209	-0.0672584	-0.0521768	-0.0378138	-0.408072	-0.367881	-0.342854	-0.29972	-0.343916	-0.421863		2.27364	-0.0859421		0.434082	0.0158488		0.961864	-0.0632856		0.574504	-0.0544652	+	4.31394	0.382478		0.984673	0.0347902
FH	Fumarate hydratase, mitochondrial		14	40.9	0	98.659	5535700000	-0.0721642	-0.223357	-0.403962	-0.339053	-0.359657	-0.519838	-0.923249	-0.471849	-0.388941	-0.480478	-0.364979	-0.556648	-0.440949	-0.567425	-0.643856	-0.489362	-0.417772	-0.622776	-0.308216	-0.321009	-0.180054	-0.305735	-0.245591	-0.188496		1.17208	-0.173022		0.263049	0.127311		0.255717	0.0407735		0.140251	0.0214981		0.123625	0.0357715		1.31954	0.317582
ANXA6	Annexin A6;Annexin		16	65.7	0	322.16	52052000000	-0.0909105	-0.15327	-0.00436351	-0.0529548	-0.0250155	-0.0735906	-0.0217019	-0.069997	-0.113208	-0.0814458	-0.0963139	-0.0915714	-0.139601	-0.200017	-0.242379	-0.254272	-0.160556	-0.0762043	-0.24407	-0.357289	-0.2859	-0.25484	-0.260601	-0.32563		0.201892	0.0323277		0.338021	-0.0214748		0.128015	0.0303218		0.147352	0.022576	+	1.82933	0.216495		0.993371	0.111151
SLC3A2	4F2 cell-surface antigen heavy chain		2	65.8	0	323.31	167640000000	0.585347	0.54201	0.550802	0.479438	0.529271	0.602457	0.507617	0.41738	0.402286	0.38084	0.461633	0.35727	0.185867	0.119821	0.142348	0.154583	0.103397	0.199751	0.14274	0.104471	0.124725	0.104873	0.0997664	0.075738		0.171563	-0.0223313		0.318698	-0.0425129		0.037652	0.00323182		0.0801927	-0.0052749	+	5.14688	0.44803	+	4.2008	0.410041
PFKM	ATP-dependent 6-phosphofructokinase, muscle type		14	31.4	0	71.821	15875000000	0.0703893	0.187007	-0.121267	-0.174996	0.155102	0.0673633	-0.282965	-0.375665	-0.265587	-0.357474	-0.102852	-0.305735	-0.291009	-0.177425	0.0460021	-0.0201209	0.177089	-0.0196968	-0.62988	-0.59861	-0.706794	-0.683345	-0.543467	-0.675881		0.0780613	-0.0295537		0.167283	0.0527187		0.547523	0.186568		0.287274	0.0465067	+	2.75041	0.708293		0.626785	0.186187
HSP90AB1	Heat shock protein HSP 90-beta		22	57.5	0	323.31	322430000000	0.176706	0.155102	0.174534	0.143002	0.178237	0.184471	0.0643311	0.0708015	0.126709	0.0988237	0.0753272	0.0768327	0.1145	0.189287	0.131326	0.145221	0.116498	0.193078	-0.432007	-0.403275	-0.419739	-0.384565	-0.383529	-0.463012		0.0037879	-0.000210931		0.047249	-0.00361918		0.0522378	0.00656116		0.259644	-0.0236566	+	5.8961	0.571307		0.428781	0.0237428
SRPR	Signal recognition particle receptor subunit alpha		7	12.1	0	9.1095	503690000	NaN	NaN	NaN	NaN	NaN	NaN	0.913416	NaN	0.352758	NaN	NaN	NaN	NaN	NaN	NaN	NaN	NaN	NaN	-0.398437	-0.509286	-0.344282	-0.294827	-0.119949	NaN		-4.34e-08	0		0	NaN		-4.34e-08	0		0.682293	0.167591		0	NaN		-4.34e-08	0
ASNS	Asparagine synthetase [glutamine-hydrolyzing]		21	48.9	0	99.449	25811000000	2.45844	1.84792	2.05977	2.41468	2.48076	2.53841	1.42567	1.52025	1.53087	1.21394	1.21971	1.26628	0.550704	0.627327	0.55159	0.479644	0.678523	0.552967	0.0766959	0.151989	0.129745	0.186501	0.183963	-0.0369551		0.649234	0.355908		2.00999	-0.258955		0.05643	-0.00616197		0.380386	-0.08151	+	3.40148	1.96596	+	2.98829	1.5455
PDHA1	Pyruvate dehydrogenase E1 component subunit alpha, somatic form, mitochondrial		9	25.3	0	18.514	2930100000	-0.325304	-0.639355	-0.34474	-0.504612	-0.689683	-0.331427	-0.197302	-0.471829	-0.311291	-0.236962	-0.451149	-0.529885	-0.453162	-0.565417	-0.620313	-0.370228	-0.181248	-0.452076	0.250719	0.273098	0.38637	0.221196	0.0549179	0.314986		0.480059	-0.0721077		0.414252	-0.0791913		0.847762	0.21178		0.247898	-0.0866802	+	2.53358	-0.730021		0.413798	0.109831
CYC1	Cytochrome c1, heme protein, mitochondrial		9	34.5	0	22.966	3260200000	-0.294721	-0.430937	-0.0247807	-0.0243992	-0.0670922	0.0889556	-0.110059	-0.31874	-0.415884	-0.175517	-0.107306	-0.351258	-0.270191	-0.33867	-0.0613303	-0.287167	-0.260186	-0.555291	-0.167717	-0.558793	-0.328562	-0.395189	-0.077315	-0.204632		1.11911	0.249301		0.325446	0.0702005		0.300084	-0.144151		1.36842	0.277626		0.573876	0.177368		0.0639	-0.0267492
SNRNP70	U1 small nuclear ribonucleoprotein 70 kDa		22	44.6	0	77.122	25882000000	-0.806922	-1.10154	-1.0432	-0.784706	-0.727045	-0.922374	0.466027	1.05095	1.2475	0.798507	0.678973	0.784336	0.704252	0.336283	0.576764	0.636358	0.700173	0.662388	0.271665	0.0432046	-0.021365	-0.0298679	-0.141939	0.551787		0.616409	0.172511		0.241322	-0.167556		0.376644	0.127206		0.426574	0.229847	+	3.34093	-0.98121	+	3.38573	-1.52299
VIM	Vimentin		15	47	0	64.615	6283600000	1.38709	0.827169	0.80587	0.354452	1.21717	1.02446	0.923492	0.596076	NaN	1.829	NaN	NaN	0.372061	0.424922	NaN	1.06874	0.0476779	0.781737	-1.30886	-1.22381	-1.28722	-1.36179	-1.306	-1.35141		0.106554	-0.141348		0	0.905506		0.088339	0.159717		0.414656	-0.0311496	+	3.53246	2.29765	+	1.04464	0.608217
RPS17	40S ribosomal protein S17		8	57	0	124.29	19023000000	-0.0458633	-0.331427	-0.18797	-0.339984	-0.0371771	-0.101118	-0.197583	0.0532504	0.0542234	-0.199057	-0.215999	-0.0872122	-0.303953	-0.0458633	-0.320738	-0.30244	-0.110449	-0.239345	0.375401	0.239642	0.313594	0.125783	0.303927	0.32987		0.0546094	0.0289936		0.662342	-0.137386		0.0466234	0.00610713		0.651896	0.110059	+	1.86137	-0.41476		0.104212	0.035098
GNAI3	Guanine nucleotide-binding protein G(k) subunit alpha	+	6	50.6	0	112.68	8015100000	-0.863257	-0.854388	-0.928594	0.791939	0.847275	0.806365	-0.496631	-0.391834	-0.362529	1.04502	NaN	0.698841	0.794187	0.502432	0.580917	1.85136	1.74287	1.77438	2.08862	0.505789	0.29725	0.324004	2.62947	2.36356	+	3.73127	1.69727		0.934956	1.30151	+	2.65307	1.16369	+	1.92611	1.98487	+	4.25951	-1.25776	+	4.12384	-1.50793
ANXA5	Annexin A5;Annexin		25	76.2	0	323.31	543000000000	0.204516	0.174534	0.186501	0.0606008	0.0551957	0.0411028	0.118227	0.0854246	0.106884	0.0418037	0.081885	0.0316775	0.0371714	-0.010207	0.0854246	-0.030634	-0.00443588	0.0254541	0.411969	0.467071	0.476019	0.455229	0.455544	0.396598		2.41723	-0.136217		0.782713	-0.0517232		0.650879	-0.0406683		1.17573	-0.0447358	+	4.89984	-0.277589		2.19133	0.151054
ACAA1	3-ketoacyl-CoA thiolase, peroxisomal		14	51.2	0	129.27	15411000000	2.33531	2.56611	2.07118	2.54151	3.92496	2.51881	0.490159	0.134352	0	0.000721115	0.257373	0.230449	-0.118852	0.0597706	-0.0912178	-0.195996	-0.319838	-0.130808	-1.65014	-1.65758	-1.57523	-1.72442	-1.50181	-1.97892		0.707548	0.670894		0.0662589	-0.045323		0.578293	-0.165447		0.206434	-0.0578781	+	4.92715	3.97661	+	3.99291	2.3743
GSTP1	Glutathione S-transferase P		11	69.5	0	245.11	80607000000	-0.27631	-0.362139	-0.267965	-0.306217	-0.336792	-0.291539	-0.336009	-0.287272	-0.312724	-0.291009	-0.265865	-0.176381	-0.396897	-0.368253	-0.19512	-0.334371	-0.434149	-0.386827	-0.211665	-0.0940177	-0.120483	-0.0830801	-0.0759761	-0.189137		0.190482	-0.00937746		0.713051	0.0675833		0.328745	-0.0650254		0.430422	-0.0597328	+	2.49553	-0.202945		0.0915983	0.0179518
LGALS1	Galectin-1		8	71.9	0	58.535	19625000000	-0.0548268	-0.150545	-0.0589237	0.00575919	-0.0174025	-0.113817	0.181548	0.288654	0.343919	0.386921	0.181675	0.297954	0.166844	0.209141	0.241352	0.15043	0.207393	0.272979	0.422125	0.355918	0.347779	0.429	0.302056	0.311852		0.312504	0.0462785		0.0595923	0.0174766		0.106735	0.00448802		0.216593	-0.0322215	+	3.4844	-0.465664	+	2.82359	-0.293878
HMGB1;HMGB1P1	High mobility group protein B1;Putative high mobility group protein B1-like 1		6	38.1	0	31.878	4623900000	0.0713507	0.102591	0.0561673	-0.0994327	-0.01105	-0.189236	0.0127832	-0.0558312	-0.0563562	-0.274878	-0.197435	0.6124	0.0130691	-0.253275	0.0289935	-0.147122	-0.050099	-0.0541227	0.0241777	-0.0523263	0.0381553	0.0123541	0.0124972	0.0779266		1.36025	-0.176609		0.0896091	0.0798303		0.0387032	-0.0133773		0.451539	0.0388062		1.20379	0.0773086		0.72767	0.147107
GSTM1	Glutathione S-transferase Mu 1		1	33.1	0	16.403	2878200000	0.559345	0.545277	0.373621	0.485839	0.629846	0.472696	0.402067	0.304861	0.599318	0.405339	0.394624	0.815575	0.570657	NaN	0.468635	0.315566	NaN	0.485324	0.378844	0.39846	0.508733	0.474877	0.566474	NaN		0.240441	0.036713		0.624456	0.103097		0.26633	-0.119201		0.149673	0.0190631		0.179124	0.0320574		0.110818	-0.026899
CLTA	Clathrin light chain A		7	28.9	0	34.818	5592900000	-0.564777	-0.185261	-0.286639	-0.485115	-0.406273	-0.478487	-0.139395	0.00331442	-0.0886535	-0.143755	-0.131772	0.00144204	-0.0171396	-0.0729986	-0.106731	-0.118273	-0.142767	-0.223121	0.0287106	0.0333701	0.118759	0.0261627	-0.0706937	0.175684		0.436804	-0.111066		0.0837632	-0.0164503		1.7006	-0.095764		0.0489774	-0.0148634	+	1.58537	-0.404989		1.13084	-0.279936
ANXA4	Annexin;Annexin A4		6	24.4	0	22.365	741990000	NaN	NaN	NaN	NaN	NaN	NaN	NaN	-0.145701	0.379177	-0.120796	NaN	0.179638	0.266996	0.1121	NaN	0.389236	NaN	0.0980152	NaN	0.139208	NaN	NaN	NaN	0.285225		-4.34e-08	0		0	-0.199539		0	0.12224		0	NaN		0	NaN		0	NaN
HMOX1	Heme oxygenase 1		15	54.2	0	190.59	102220000000	5.81483	5.14057	3.86532	3.36751	5.42388	3.78346	3.2521	5.36992	4.47508	3.97039	4.24952	5.62764	3.61941	4.51891	4.89118	4.12697	4.52086	4.48884	-2.24311	-2.36676	-2.31272	-2.34843	-2.22938	-2.62451		0.324243	-0.748628		0.122684	0.250149		0.0436063	0.035723		0.059048	-0.02303	+	3.65961	7.28288		0.363906	0.597077
PARP1	Poly [ADP-ribose] polymerase 1		14	17.1	0	38.168	3379000000	-0.30843	-0.0561912	0.0681893	-0.290586	-0.211064	-0.207494	0.156008	-0.158462	0.0214797	-0.167167	-0.135681	-0.169485	-0.149601	-1.17746	-0.060954	-0.169891	-0.048263	-0.0201503	0.0829751	0.167743	0.358734	0.305562	-0.00397285	0.320658		0.606175	-0.137571		0.609674	-0.163786		0.384429	0.383236		0.481017	-0.144126	+	1.40716	-0.376157		0.412405	0.36386
LTA4H	Leukotriene A-4 hydrolase		33	62.2	0	323.31	93970000000	2.93827	2.78344	3.31583	3.25767	3.17546	3.21878	3.05958	2.96724	2.84338	2.92499	2.78293	3.31311	2.62908	2.7332	2.42377	2.90024	2.63949	3.16124	-1.80359	-1.82593	-1.75429	-1.79781	-1.62932	-1.81604		0.507103	0.204796		0.0792272	0.0502791		0.478252	0.304974		0.377866	0.0430239	+	5.1411	4.80519		1.07519	0.417161
ALDOC	Fructose-bisphosphate aldolase C		1	17.9	0	66.199	22319000000	-0.261362	-0.248965	-0.406713	-0.344538	-0.326462	-0.366299	-0.279687	-0.196723	-0.304238	-0.245591	-0.293094	-0.225059	-0.0752464	-0.190009	-0.229602	-0.191557	-0.123277	-0.301479	-0.227624	-0.083875	-0.068907	-0.0871049	-0.0567613	-0.0803319		0.372083	-0.0400864		0.034082	0.00563451		0.268326	-0.0404851		0.300194	-0.0416103	+	1.94224	-0.225718		0.960401	-0.140727
U2AF1;U2AF1L4	Splicing factor U2AF 35 kDa subunit;Splicing factor U2AF 26 kDa subunit		2	15	0	27.077	3651000000	-0.24643	NaN	-0.0235923	0.0923428	0.14965	NaN	NaN	NaN	1.00094	1.03295	NaN	NaN	NaN	0.640343	0.754203	NaN	NaN	0.666575	-0.259513	0.543793	0.654985	0.692427	NaN	0.653519		0	0.338772		0	NaN		0	-0.0876286		0.328652	-0.421107	+	2.32085	-0.765413	+	1.66031	-0.832284
CBS	Cystathionine beta-synthase		7	17.6	0	23.868	1017800000	0.654894	0.56003	1.37773	0.67437	0.190804	0.544485	0.373954	0.533862	0.536152	0.605779	0.553557	0.476122	NaN	NaN	0.289716	0.122871	0.597126	0.894604	0.173639	0.617769	0.320543	0.290896	0.329296	-0.0534338		0.600739	-0.394333		0.2677	0.0638298		0	0.604888		0.701024	-0.259902		0.749464	0.454484		0	0.574503
RAP2A	Ras-related protein Rap-2a		2	37.2	0	5.471	251690000	NaN	NaN	NaN	NaN	NaN	NaN	NaN	NaN	-0.370228	NaN	NaN	NaN	0.257373	NaN	NaN	0.197236	NaN	0.303109	NaN	NaN	NaN	NaN	NaN	NaN		-4.34e-08	0		0	NaN		0	-0.0601364		-4.34e-08	0		-4.34e-08	0		0	NaN
TROVE2	60 kDa SS-A/Ro ribonucleoprotein		5	10.6	0	14.618	1126300000	0.320311	NaN	NaN	0.0684644	NaN	NaN	0.0469799	NaN	NaN	NaN	NaN	NaN	NaN	NaN	NaN	NaN	NaN	0.385265	-0.491835	-0.68615	-0.516099	-0.488856	-0.649412	NaN		0	-0.251847		0	NaN		0	NaN		0.0541339	0.0305011		0	0.884013		0	NaN
HLA-A	HLA class I histocompatibility antigen, A-69 alpha chain;HLA class I histocompatibility antigen, A-2 alpha chain;HLA class I histocompatibility antigen, A-23 alpha chain;HLA class I histocompatibility antigen, A-24 alpha chain		1	45.2	0	152.06	15203000000	1.79223	1.41045	1.6717	1.56608	1.68464	1.62812	0.623867	0.651316	0.745022	0.656268	0.522859	0.781737	0.858299	0.804219	0.839153	0.772392	0.875544	0.845109	1.77606	1.65347	1.9689	1.91089	1.79427	1.59302		0.00313625	0.00148757		0.124484	-0.0197802		0.0197881	-0.00287545		0.354436	-0.123303		0.670455	-0.219626	+	2.64767	0.790903
TXN	Thioredoxin		6	51.4	0	23.307	8039100000	0.331017	0.337197	0.209017	0.165044	0.276913	0.319734	0.546265	0.0278618	0.485839	0.237931	0.229711	0.235972	0.348799	0.178492	0.115566	0.368489	-0.0138585	0.332164	-0.213688	-0.329939	-0.300662	-0.435105	-0.223711	-0.299898		0.167529	-0.0385135		0.269281	-0.118784		0.0397051	0.0146459		1.62543	0.10947	+	3.42536	0.647646		0.408347	0.0781248
PRKAR1A	cAMP-dependent protein kinase type I-alpha regulatory subunit;cAMP-dependent protein kinase type I-alpha regulatory subunit, N-terminally processed		6	18.6	0	14.293	894730000	NaN	0.681944	0.543991	NaN	NaN	NaN	NaN	NaN	NaN	NaN	NaN	NaN	0.081885	NaN	NaN	NaN	NaN	NaN	-0.568388	-0.89191	-0.796135	-0.744052	NaN	-0.675512		0	NaN		-4.34e-08	0		0	NaN		0.435223	0.196031	+	3.47965	1.42367		0	0.531082
ESD	S-formylglutathione hydrolase		4	22	0	19.869	1295400000	-0.0828814	-0.48922	-0.398398	-0.117349	-0.387619	-0.352492	-0.163284	-0.0011691	NaN	-0.195616	-0.314535	-1.22374	NaN	NaN	-0.0782743	0.049352	NaN	NaN	0.207018	0.269033	0.217975	0.309409	0.205518	0.274888		0.355814	0.03768		0.361963	-0.172849		0	NaN		0.897072	-0.0363312	+	2.02355	-0.588973		0	-0.245226
HSPD1	60 kDa heat shock protein, mitochondrial		26	73.1	0	323.31	360920000000	0.00403388	-0.050114	-0.0218629	-0.0601115	-0.023783	-0.063771	-0.267062	-0.240708	-0.236249	-0.280335	-0.303169	-0.257804	-0.129908	-0.186049	-0.158124	-0.146787	-0.153735	-0.161879	0.254836	0.256407	0.229957	0.154713	0.176833	0.222186		0.364621	-0.0265741		0.778408	-0.0324298		0.0882947	0.00389272		0.0390057	0.00425965	+	2.63628	-0.23634		2.41395	0.135379
CLU	Clusterin;Clusterin beta chain;Clusterin alpha chain;Clusterin		7	23.6	0	20.055	1234400000	-0.533451	NaN	-0.780066	-1.85543	-1.63868	-1.96697	NaN	-1.77468	-0.860478	-0.312402	0.626299	-1.09875	NaN	NaN	NaN	-0.731733	-1.08317	NaN	-0.384716	0.393965	NaN	NaN	-1.1202	-1.04388	+	1.46543	-1.25444		0.249513	1.08135		0	NaN		0	-0.778681		0	-1.05072		0	NaN
HSPA5	78 kDa glucose-regulated protein		27	45.7	0	179.9	43338000000	-0.0547369	-0.0810185	-0.218682	-0.241731	-0.173352	-0.250337	-0.270678	-0.315379	-0.213588	-0.309038	-0.285337	-0.266177	-0.345858	-0.345491	-0.31371	-0.403046	-0.432766	-0.308216	0.263035	0.333996	0.350045	0.316841	0.15004	0.160404		0.827348	-0.103661		0.29286	-0.0203025		0.634286	-0.0463229		1.1935	-0.142468	+	3.02349	-0.451773		1.85476	0.216874
HSPA8	Heat shock cognate 71 kDa protein		13	61.8	0	313.24	146420000000	-0.0768737	-0.0932171	-0.0725586	-0.0854048	-0.0802709	-0.0612099	-0.173873	-0.0398739	-0.0582626	-0.0809575	-0.0436757	-0.0525059	0.00733906	0.0745054	-0.000606022	0.00805652	0.0291349	-0.0296617	0.00417777	-0.12455	-0.0829426	-0.0872888	-0.104403	-0.0646609		0.278745	0.00525455		0.384975	0.0316233		0.677369	-0.0245696		0.36272	0.0432986		0.522106	0.0173774		1.92589	-0.107963
SLC2A1	Solute carrier family 2, facilitated glucose transporter member 1		5	8.1	0	12.533	1548500000	NaN	0.73127	0.702392	NaN	0.824564	0.96451	0.935988	1.12075	0.99899	1.09788	NaN	NaN	NaN	NaN	NaN	0.971516	NaN	NaN	0.238542	0.192321	0.138028	0.0350608	0.0316775	0.199248		0.54927	0.177706		0	0.161893		0	NaN		0.154211	0.0346863	+	2.65079	0.595028		0	NaN
PDHB	Pyruvate dehydrogenase E1 component subunit beta, mitochondrial		10	42.2	0	33.902	5330400000	0.179256	0.18002	0.102725	0.122871	0.138028	-0.0096841	0.0635029	0.052555	0.0780633	-0.136712	0.0769695	-0.0397107	-0.245968	-0.0800117	0.105678	0.254715	0.0913952	0.127501	0.243791	0.465922	0.254473	0.246955	-0.0131304	0.305445		1.08562	-0.0702622		0.561753	-0.097858		0.613309	0.231304		0.531633	-0.143748		1.03813	-0.168449		1.01917	0.227434
G6PD	Glucose-6-phosphate 1-dehydrogenase		34	71.5	0	106.84	27506000000	0.810402	0.767655	0.858618	0.808756	0.782241	0.816886	0.71264	0.739416	0.721241	0.760604	0.734395	0.894139	0.62686	0.750263	0.752663	0.78073	0.774081	0.745366	0.19131	0.142348	0.186247	0.196859	0.278461	0.188654		0.204649	-0.00959716		0.514632	0.071947		0.433117	0.056797		0.57357	0.0443237	+	4.47307	0.637074		0.975193	0.102296
PC	Pyruvate carboxylase, mitochondrial		60	69.5	0	323.31	539980000000	-5.16649	-5.04463	-5.10731	-5.06642	-5.18097	-5.3198	-5.46721	-5.43834	-5.2644	-5.39617	-5.44436	-5.40464	-5.44392	-5.53336	-5.55497	-5.50826	-5.36796	-5.41803	-4.34737	-4.2689	-4.50085	-4.4217	-4.33675	-4.46814		0.326813	-0.0829158		0.140278	-0.0250718		0.412284	0.0793358		0.0557871	0.013066	+	3.11993	-0.708991	+	2.93318	0.404605
MTHFD1	C-1-tetrahydrofolate synthase, cytoplasmic;Methylenetetrahydrofolate dehydrogenase;Methenyltetrahydrofolate cyclohydrolase;Formyltetrahydrofolate synthetase;C-1-tetrahydrofolate synthase, cytoplasmic, N-terminally processed		43	55.7	0	207.89	25502000000	0.201132	0.160275	0.0762854	0.0271541	0.189919	0.243181	-0.0863388	0.0697022	-0.0735602	0.0153548	0.0594937	0.200755	-0.0226102	-0.162557	-0.0575868	-0.149697	-0.16579	-0.0152721	-0.736124	-0.682464	-0.676964	-0.769035	-0.746495	-0.699138		0.0239388	0.00752098		0.555098	0.121934		0.207062	-0.029335		0.139136	-0.0177646	+	4.25899	0.855385		1.81445	0.226815
ADH5	Alcohol dehydrogenase class-3		16	41.7	0	85.024	12699000000	1.20283	1.29337	1.287	1.06619	1.49656	1.32987	0.848958	1.20927	1.05061	1.01657	0.930851	0.860605	0.74485	0.49293	0.904118	0.853117	0.86267	0.942683	-1.10799	-1.08006	-0.979772	-1.13315	-0.980341	-1.05724		0.127355	0.0364773		0.268693	-0.100269		0.638792	0.172191		0.179386	0.0158014	+	5.77253	2.32539	+	1.94581	0.547099
PABPC1	Polyadenylate-binding protein 1;Polyadenylate-binding protein		8	42	0	120.29	7642400000	0.042084	0.0894982	0.101919	0.0347792	0.133037	0.241108	0.123666	0.284396	0.229834	0.18002	0.111298	0.267596	0.196355	0.193456	0.193835	0.206143	0.214	0.379954	-0.596034	-0.658971	-0.597845	-0.578349	-0.592332	-0.634308		0.513706	0.0584745		0.12221	-0.0263271		0.476875	0.0721502		0.0387924	0.00416366	+	4.6521	0.689555		2.51266	-0.116715
PCNA	Proliferating cell nuclear antigen		11	49.4	0	107.57	11722000000	0.199876	0.153935	0.103531	0.0742315	0.16092	0.215368	-0.19024	-0.184277	-0.131203	-0.0704817	-0.0200624	-0.128078	-0.0130576	-0.195748	-0.174849	-0.184507	-0.110355	-0.153142	0.388906	0.311387	0.429964	0.493647	0.427606	0.361095		0.0102825	-0.00227429		0.733891	0.0956993		0.0929814	-0.0214494		0.105551	-0.0191306	+	1.8997	-0.259219	+	1.92348	0.280333
HARS	Histidine--tRNA ligase, cytoplasmic		14	51.3	0	81.701	4869200000	0.125916	0.238542	-0.111929	0.0422241	-0.0494719	-0.40924	-0.184195	0.0265876	0.062398	-0.150689	-0.362844	-0.142401	-0.0631529	0.40523	0.234624	0.0958569	0.135798	-0.107694	-0.172783	-0.181395	-0.269182	-0.244412	-0.110246	-0.503343		1.06863	-0.223006		0.574526	-0.186908		0.360165	-0.150914		0.0828031	-0.0304612	+	1.38313	0.315839		0.249657	-0.108057
SLC25A4	ADP/ATP translocase 1	+	5	55	0	16.575	3653700000	2.36048	NaN	2.07262	1.88241	2.12625	2.08079	1.46545	0.930548	1.37256	1.54483	1.83265	NaN	0.552771	1.0635	NaN	0.738725	0.626953	0.925468	-1.95926	-1.96765	-1.80778	-1.67434	-1.75931	-1.88013		0.291678	-0.234947		0.352495	0.490739		0.121273	-0.125298		0.226495	-0.0496439	+	3.9194	4.03314	+	1.39049	1.40841
SLC25A6	ADP/ATP translocase 3;ADP/ATP translocase 3, N-terminally processed	+	5	61.7	0	147.65	165000000000	1.86588	1.91376	1.98448	2.06719	2.19169	1.99971	1.39182	1.33314	1.27614	1.36519	1.34857	1.32774	1.09099	1.02984	1.07963	1.22083	1.11809	1.19956	-1.36516	-1.4214	-1.3752	-1.29428	-1.2305	-1.4839		0.77228	0.164824		0.213413	0.0134688		1.91498	0.112672		0.0117255	0.00376896	+	6.4699	3.285	+	4.58024	0.854552
CKB	Creatine kinase B-type		17	69.8	0	191.76	40511000000	-0.146451	-0.31337	-0.217625	-0.100809	-0.119949	-0.221371	-0.251728	-0.204931	-0.292952	-0.241782	-0.26774	-0.183671	-0.164302	-0.148257	-0.176397	-0.249479	-0.0650533	-0.0826522	-0.238136	-0.336245	-0.349511	-0.419469	-0.266542	-0.404802		0.499643	0.078439		0.129378	0.0188064		0.186838	0.0305906		0.899236	0.0652486		1.22205	0.142593		0.569658	-0.0628298
ANXA3	Annexin A3;Annexin		18	61.9	0	73.356	12047000000	0.470511	0.328607	0.522759	0.480058	0.678072	0.50518	0.614286	0.606821	0.629473	0.649386	0.525267	0.555325	0.479231	0.452279	0.520045	0.463936	0.454702	0.504468	0.29066	0.328262	0.224164	0.185867	0.222434	0.266757		0.359676	0.113811		0.400048	-0.0402007		0.598226	-0.00948278		0.13604	0.0138527		1.26876	0.194528		0.284549	-0.0432261
ACTN1	Alpha-actinin-1		7	34	0	36.2	4430900000	0.753605	0.710173	0.508124	0.660199	0.439464	0.306262	1.28724	NaN	NaN	1.69622	NaN	NaN	NaN	NaN	1.75429	-1.13708	NaN	NaN	-0.0623844	0.246469	0.183455	0.340619	-0.067198	0.307428		1.17163	-0.188659		0	0.408981		0	NaN		0.84561	-0.197566	+	1.97646	0.400453		0	-1.09699
XRCC6	X-ray repair cross-complementing protein 6		31	50.6	0	255.84	69714000000	0.317883	0.232047	0.297015	0.224287	0.296898	0.277152	0.221073	0.208892	0.270947	0.287236	0.0601858	0.236585	0.116764	0.0803848	0.0959919	0.175173	0.224658	0.277033	-0.566741	-0.512699	-0.5713	-0.463927	-0.363178	-0.54713		0.120786	-0.0162027		0.226029	-0.0389686		1.1422	0.127908		0.0848549	0.0236254	+	4.41273	0.79829		2.56712	0.184601
XRCC5	X-ray repair cross-complementing protein 5		32	53.3	0	231.9	75308000000	0.0900404	-0.0188049	0.123931	0.163241	0.117429	0.091666	-0.0309877	-0.0106139	0.00920381	-0.0392066	-0.0185711	-0.017972	-0.0888224	-0.15117	-0.0661706	-0.0364815	-0.0651741	-0.0200039	-0.0157679	0.138421	0.132643	0.244034	0.052555	0.0209111		0.452795	0.0590566		0.82064	-0.0144507		1.41803	0.0615011		1.17931	-0.152467		0.883102	-0.106644		1.54104	0.16711
LAMP2	Lysosome-associated membrane glycoprotein 2		2	4.9	0	9.218	596380000	NaN	NaN	NaN	NaN	NaN	NaN	NaN	NaN	NaN	NaN	NaN	NaN	0.267715	NaN	0.515006	NaN	NaN	0.258941	NaN	0.0413831	-0.00568092	NaN	-0.136664	-0.174459		-4.34e-08	0		-4.34e-08	0		0	-0.256065		0	-0.130983		0	NaN		0	NaN
RNH1	Ribonuclease inhibitor		10	36	0	82.305	4343100000	-0.252363	-0.410716	-0.360379	-0.311685	NaN	-0.241339	-0.194047	-0.285056	-0.198908	NaN	NaN	NaN	-0.642955	-0.149425	NaN	NaN	NaN	-0.623754	0.0724488	0.23634	0.158596	0.0590784	0.128821	-0.108005		0.100005	0.0298592		0	NaN		0	NaN		0.931042	-0.12025	+	2.68187	-0.492491		0.0998251	0.055037
CYBA	Cytochrome b-245 light chain		1	5.1	0.00258	2.1262	116510000	NaN	NaN	NaN	NaN	NaN	NaN	NaN	NaN	NaN	NaN	NaN	NaN	NaN	NaN	NaN	NaN	NaN	NaN	NaN	-0.522219	-1.90563	NaN	NaN	NaN		-4.34e-08	0		-4.34e-08	0		-4.34e-08	0		0	NaN		0	NaN		-4.34e-08	0
EEF2	Elongation factor 2		47	62.8	0	323.31	197970000000	-0.190701	-0.17288	-0.183802	-0.23914	-0.200946	-0.145925	-0.111415	-0.126423	-0.174149	-0.212016	-0.224267	-0.135586	-0.111804	-0.108161	-0.165305	-0.110122	-0.138061	-0.166389	-0.0503679	-0.0507564	-0.13291	-0.0427094	-0.00473979	-0.0592845		0.17389	-0.012876		0.436821	-0.053294		0.361046	-0.00976714		0.301263	0.0373279		1.66369	-0.107002		1.31881	-0.0540376
PDIA4	Protein disulfide-isomerase A4		4	8.5	0	9.1885	715640000	-0.45904	NaN	NaN	-0.567383	NaN	NaN	NaN	-0.0634393	-0.467613	-0.33248	NaN	NaN	-0.580051	-0.474653	-1.3548	-0.595664	-0.502628	-0.556478	0.26135	-0.0124172	0.0558898	0.0433446	NaN	0.147828		0	-0.108342		0	NaN		0.34236	0.251577		0.572033	0.189125		0	-0.487979		0	0.344126
P4HA1	Prolyl 4-hydroxylase subunit alpha-1		5	15.9	0	6.0586	1624600000	NaN	NaN	NaN	NaN	NaN	NaN	NaN	NaN	-0.343696	NaN	NaN	NaN	NaN	NaN	-0.694718	NaN	-0.362251	-0.732308	NaN	NaN	NaN	NaN	NaN	0.323543		-4.34e-08	0		0	NaN		0	-0.0375902		0	NaN		-4.34e-08	0		0	NaN
PLS3	Plastin-3		34	62.4	0	245.27	42687000000	0.337426	0.377624	0.232906	0.306496	0.315102	0.358846	0.635244	0.450169	0.604736	0.67428	0.52095	0.691087	0.578117	0.668119	0.56774	0.475811	0.563646	0.650489	-0.00937905	0.113567	0.102994	0.0458623	-0.0335253	-0.000259717		0.0606256	0.0108296		1.37197	0.0653899		0.241247	-0.0413435		1.1638	-0.101862	+	2.05109	0.228511	+	2.23977	-0.288674
ETFA	Electron transfer flavoprotein subunit alpha, mitochondrial		9	37.2	0	33.452	4421100000	-0.0938021	-0.32357	-0.169972	-0.421863	-0.349401	-0.701952	-0.680105	-0.660406	-0.127463	NaN	-0.641131	-0.823345	-0.478065	-0.483803	-0.397068	NaN	NaN	-0.585063	0.109561	0.25084	0.0628125	0.121413	0.143002	0.136848		0.739055	-0.295291		0.285981	-0.338304		0	-0.187995		0.076515	-0.0152187	+	1.7545	-0.340803		1.61025	0.257197
PRKAR2A	cAMP-dependent protein kinase type II-alpha regulatory subunit		11	36.6	0	38.569	3858100000	-0.0448658	-0.109483	-0.00339428	0.491289	1.25375	1.31179	-0.227337	-0.126817	0.0447438	0.762221	NaN	0.896311	0.587653	0.369048	1.00202	0.567935	0.725697	0.850719	-0.11973	-0.193305	-0.226189	-0.25068	-0.0181035	-0.0661404		1.24219	1.07152		1.32216	0.920563		0.140432	0.0618776		1.19098	0.1554		2.08583	0.17081	+	1.69988	-0.705487
ENO3	Beta-enolase;Enolase		6	40.3	0	20.244	2702200000	-0.92681	-0.946805	-0.812029	-0.919588	-0.761678	-0.897973	-1.29071	-0.9155	-1.49346	-0.86691	NaN	-1.25247	-1.23182	-0.503486	-1.10724	NaN	-0.965136	-0.847648	-0.466676	-0.237473	-0.358861	NaN	-0.611954	-0.429518		0.1554	0.0354687		0.767417	0.332396		0.0829615	-0.101027		1.50158	-0.241148	+	2.45946	-0.597048		0.0807156	0.0523016
MIF	Macrophage migration inhibitory factor		2	17.4	0	9.4275	15552000000	0.583712	0.689568	0.405339	0.212258	1.16137	0.984772	0.0972062	0.194087	-0.217038	0.332966	-0.252037	0.229834	0.297015	0.269512	0.326883	-0.254978	0.262914	0.580628	-0.746737	-0.897006	-0.982278	-0.981822	-0.790384	-0.747173		0.275997	0.226594		0.0983165	0.0788358		0.148551	-0.101615		1.80481	0.19227	+	4.1802	1.51324		1.43884	0.261736
CD99	CD99 antigen		2	14.2	0	9.2287	3072300000	NaN	NaN	NaN	NaN	NaN	NaN	NaN	NaN	NaN	NaN	NaN	NaN	NaN	-0.656808	NaN	-1.5679	NaN	-0.644713	NaN	NaN	NaN	-1.49468	NaN	NaN		-4.34e-08	0		-4.34e-08	0		0	NaN		0	NaN		0	NaN		0	NaN
FDPS	Farnesyl pyrophosphate synthase		8	30.6	0	35.091	10141000000	0.962438	0.807932	0.919988	0.959919	0.959548	0.997907	0.631896	0.568227	0.631803	0.658463	0.623773	0.640066	0.498864	0.552869	0.577634	0.547055	0.546759	0.523963	0.0760118	0.0893625	0.103531	0.128425	0.21014	0.0467006		0.635995	0.0756715		0.795617	0.0301255		0.0421228	-0.00386331		0.0219681	0.00384428	+	4.11603	0.78968	+	2.6242	0.353664
AKR1A1	Alcohol dehydrogenase [NADP(+)]		11	41.2	0	26.146	4647900000	0.170438	0.00891703	-0.0850681	0.183582	-0.0168622	-0.108052	-0.284528	-0.219388	-0.00484117	-0.228537	-0.211949	0.463832	-0.0436905	-0.131313	-0.0422785	-0.259392	-0.0324772	-0.0334957	0.565305	0.444243	0.482332	0.592445	0.600175	0.623586		0.353104	-0.0118731		0.4569	0.177368		0.132427	-0.0360275		1.03411	0.0900151	+	2.2645	-0.474911		0.576619	0.103856
PKM	Pyruvate kinase PKM;Pyruvate kinase		43	82.1	0	323.31	389690000000	0.115033	0.0657101	0.170694	0.0313951	0.105008	0.121546	0.145612	0.125387	0.0765591	0.0862402	0.0877344	0.0762854	0.044464	0.033793	0.0177795	0.109561	0.0311129	0.0684644	0.160533	0.190552	0.18916	0.211261	0.188021	0.154583		0.314878	-0.0311629		0.696843	-0.0324326		0.680001	0.0377007		0.678947	-0.0292787		1.20445	-0.0798453		1.27578	0.0851337
HSP90B1	Endoplasmin		35	55.4	0	178.2	30565000000	0.000288558	-0.139315	-0.115441	-0.209178	-0.145637	-0.0881013	-0.357345	-0.305057	-0.387129	-0.438229	-0.401692	-0.32954	-0.414422	-0.442948	-0.511876	-0.461581	-0.51344	-0.503568	0.256286	0.285816	0.302056	0.24987	0.336055	0.208018		0.314097	-0.0628162		0.300814	-0.0399769		0.586365	-0.0364479		0.187805	-0.0124613	+	2.86817	-0.36407	+	2.69542	0.371593
IDE	Insulin-degrading enzyme		47	49.8	0	198.62	37678000000	2.30039	2.63854	2.24693	2.13586	2.59364	2.91468	2.20549	2.11173	2.82049	2.77471	2.25912	2.26159	2.29107	3.03935	2.35626	2.68972	2.33828	2.39053	-2.24257	-2.28188	-2.26958	-2.18922	-2.24263	-2.26965		0.210389	0.152778		0.051709	0.052574		0.0924737	-0.0893809		0.0397844	-0.00472498	+	5.48941	4.64218		0.245417	-0.166943
DARS	Aspartate--tRNA ligase, cytoplasmic		8	23.2	0	24.348	2210800000	0.593784	-0.0357714	NaN	NaN	NaN	0.0738203	-0.50982	NaN	0.528471	0.957543	NaN	1.55252	1.14104	0.860605	-0.165467	NaN	0.275961	NaN	0.331476	0.946282	-0.420878	0.393965	-0.0980114	0.353323		0	NaN		0.95038	1.24571		0	-0.584645		0.140284	-0.11086		0.015821	-0.0274501		0.224573	-0.333053
JUP	Junction plakoglobin		21	45.9	0	69.957	4166700000	-1.92835	-2.2632	-2.38203	-2.53491	-1.9833	-1.92117	-2.50652	-1.85157	-1.89867	NaN	NaN	-1.92451	-2.47361	NaN	NaN	-2.15573	-3.00752	-2.57871	NaN	-2.00938	-2.7669	-1.38949	-1.31136	-1.40259		0.0435694	0.0447261		0	-0.0258358		0	0.317884		0.296082	0.721218		0.117559	-0.135934		0	0.282421
AKR1B1	Aldose reductase		12	45.3	0	24.328	8263900000	0.42825	0.419539	0.389567	0.271665	0.278936	0.512783	0.309526	0.299245	0.675906	0.244034	0.223793	0.629193	0.375735	0.430928	0.413486	0.259905	0.390117	0.405992	0.67075	0.611172	0.687061	0.510456	0.621524	0.622181		0.230531	-0.0579904		1.75293	-0.0625518		0.638637	-0.054711		0.242833	0.0352553		1.65418	-0.190445		0.102831	0.00573582
GSPT1	Eukaryotic peptide chain release factor GTP-binding subunit ERF3A		15	26.9	0	48.504	21869000000	-0.387393	-0.199305	-0.134287	-0.132388	-0.125116	0.175173	-0.128298	-0.0578571	-0.0727103	0.0647449	NaN	0.227125	0.108357	0.00388999	0.0366088	-0.116192	-0.288153	0.00662125	-0.142895	-0.287624	-0.175224	-0.530427	-0.279511	-0.29504		1.01862	0.212884		0.866982	0.246439		0.83502	-0.182193		0.336485	0.0919431		0.282562	0.0907634	+	1.61929	-0.289947
B4GALT1	Beta-1,4-galactosyltransferase 1;Lactose synthase A protein;N-acetyllactosamine synthase;Beta-N-acetylglucosaminylglycopeptide beta-1,4-galactosyltransferase;Beta-N-acetylglucosaminyl-glycolipid beta-1,4-galactosyltransferase;Processed beta-1,4-galactosyltransferase 1		12	52	0	119.75	29763000000	0.844868	0.932817	0.958137	1.00978	1.15173	1.13402	-0.825696	-0.757623	-0.852042	-0.841766	-0.736677	-0.735019	1.30369	1.49968	1.39523	1.53923	1.09916	1.18574	1.9052	1.56326	1.63594	1.57836	1.92418	1.78157		2.11287	0.186569		0.383692	0.0406327		0.239713	-0.124822		1.68848	0.277796	+	4.11907	-0.680578	+	2.74199	-0.487593
CD46	Membrane cofactor protein		2	21.6	0	14.372	3276700000	1.44763	1.3729	1.64897	1.81496	1.49036	2.14274	-0.501239	-0.445912	-0.565033	-0.514429	-0.683345	-0.408168	-0.21969	-0.188463	-0.176185	-0.0368662	-0.381573	-0.100639	2.014	1.78814	1.59608	1.56037	1.73695	1.6263		1.0077	0.326188		0.0915227	-0.0312524		0.0636338	0.0217534		1.05007	0.144219		0.660334	-0.158364	+	4.44916	1.68461
CD46	Membrane cofactor protein		1	21.7	0	10.076	649650000	NaN	0.458487	0.728399	0.826437	NaN	0.945008	NaN	NaN	NaN	NaN	NaN	NaN	NaN	NaN	NaN	NaN	NaN	NaN	NaN	NaN	NaN	NaN	NaN	NaN		0	0.216609		-4.34e-08	0		-4.34e-08	0		-4.34e-08	0		0	NaN		0	NaN
NME1	Nucleoside diphosphate kinase A		2	81.6	0	9.1072	3716100000	0.0936954	0.106348	0.0922074	NaN	0.0333701	0.147437	-0.117052	NaN	0.128821	-0.131187	0.148348	NaN	NaN	NaN	NaN	0.0234682	0.239154	0.32435	-0.392402	-0.198924	-0.303597	-0.369427	-0.513358	-0.438034		0.0398031	-0.00887441		0	-0.0141351		0	NaN		1.14381	-0.157282	+	2.83327	0.388066		0	NaN
RPS2	40S ribosomal protein S2		18	63.8	0	85.998	40261000000	0.264356	0.304161	0.375512	0.161823	0.248778	0.308827	0.194717	0.234011	0.201759	0.0652966	0.0159258	0.1133	0.0946415	0.0204844	0.0392789	0.0568609	0.13829	0.0231843	-0.380108	-0.418465	-0.410908	-0.336792	-0.483985	-0.45797		1.46597	-0.074867		1.20179	-0.145322		0.152338	0.0213102		0.41331	-0.0519659	+	4.14154	0.703398	+	2.58313	0.263208
DSP	Desmoplakin		48	18.5	0	138.39	14895000000	-2.52516	NaN	-2.13511	0.908198	-3.08387	-0.500769	2.09356	0.829281	-1.4767	-2.32742	2.20742	NaN	-0.757696	1.55243	NaN	-2.42523	-0.86415	-1.9502	NaN	NaN	-2.61626	0.78266	1.24562	-0.225599		0.663213	2.53385		0.159659	-1.52142		0.937511	-2.04206		0.178762	1.42681		0.304908	-1.41334	+	0.83773	-2.7275
ITGB4	Integrin beta-4		3	2.4	0	4.6636	1030600000	NaN	NaN	1.30801	NaN	NaN	NaN	0.830012	NaN	NaN	NaN	NaN	NaN	NaN	NaN	NaN	NaN	NaN	NaN	NaN	NaN	NaN	NaN	1.25562	0.420833		0	NaN		0	NaN		-4.34e-08	0		0	NaN		0	NaN		0	NaN
CBR1	Carbonyl reductase [NADPH] 1		10	62.1	0	87.338	6920600000	0.306029	0.196481	-0.158703	0.0901759	-0.125179	0.165944	-0.453261	0.109962	-0.124047	0.139731	0.073546	NaN	0.170438	-0.158961	-0.0918788	0.213254	-0.30586	-0.0252358	0.104739	0.200755	0.169284	0.0469799	-0.101892	0.34551		0.120995	-0.0709554		0.268374	0.278288		0.0602401	-0.0124799		0.0436492	-0.0228874		0.0570289	-0.024404		0.338628	0.141403
HIST1H1C;HIST1H1D	Histone H1.2;Histone H1.3		1	22.5	0	15.11	2592700000	0.161694	0.1644	-0.381837	-0.287554	-0.268834	-0.339747	0.597889	0.300065	0.325962	0.34301	0.252537	0.0724488	-0.106063	-0.328109	-0.2124	-0.123104	-0.28072	-0.369744	0.373509	1.38808	0.370722	0.306845	0.297954	-0.0831412		0.649101	-0.280131		0.939768	-0.185307		0.25478	-0.0423318		0.663455	-0.492442	+	0.831032	-0.70713		0.438468	0.196943
POR	NADPH--cytochrome P450 reductase		15	32.8	0	53.873	6293600000	-0.210646	-0.21558	0.365469	NaN	0.520648	-0.270191	0.227371	-0.0896204	-0.113099	-0.0130285	0.139339	0.414785	-0.393539	-0.0697092	0.0082	0.064469	0.396598	-0.356144	-0.195104	-0.158204	-0.341519	-0.297733	-0.262763	-0.48451		0.0207182	0.0502846		0.282447	0.172148		0.245684	0.186657		0.226288	-0.0483071		0.54042	0.245566		0.224493	0.13143
ATP2A2	Sarcoplasmic/endoplasmic reticulum calcium ATPase 2		29	38.5	0	171.02	20276000000	1.19251	1.12174	1.06881	1.02786	1.1797	1.32326	0.646624	0.724214	0.733441	0.761796	0.700795	0.628074	0.544584	0.435202	0.478299	0.314639	0.341872	0.358171	-0.761825	-0.792532	-0.715131	-0.830203	-0.709151	-0.893089		0.14054	0.0492519		0.0221831	-0.00453802		1.14574	-0.147801		0.105326	-0.00873292	+	5.57348	1.90698	+	3.74511	0.641659
HSPA6;HSPA7	Heat shock 70 kDa protein 6;Putative heat shock 70 kDa protein 7		2	16.3	0	7.7043	12440000000	NaN	0.067501	NaN	NaN	NaN	NaN	-0.102744	NaN	NaN	NaN	-0.456128	-0.303205	-0.232956	NaN	NaN	NaN	NaN	-0.995534	NaN	0.165944	NaN	NaN	NaN	NaN		0	NaN		0	NaN		0	NaN		0	NaN		0	-0.098443		0	0.300456
GOT1	Aspartate aminotransferase, cytoplasmic		12	40.7	0	25.614	1881100000	-0.196823	-0.393501	-0.689986	-0.845572	NaN	0.0104934	NaN	0.27274	-0.680868	-0.534851	NaN	-0.561239	-0.567917	-0.557433	-0.580353	-0.524915	-0.620202	-0.541807	0.256528	-0.018688	0.181675	0.0409626	-0.0140333	0.135009		0.0107264	0.0258647		0	0.119629		0.0590464	0.00625996		0.146202	0.0578514	+	1.47816	-0.494753		0.421385	0.141798
NDUFB7	NADH dehydrogenase [ubiquinone] 1 beta subcomplex subunit 7	+	6	43.1	0	8.6862	1108700000	-1.42907	-1.86061	-1.36963	0.188401	NaN	NaN	NaN	-1.36068	-1.25891	-0.310379	NaN	-0.36012	NaN	NaN	NaN	NaN	NaN	NaN	NaN	-0.275751	-0.164076	NaN	NaN	NaN		0	1.61747		0	0.898789		-4.34e-08	0		0	NaN	+	2.13766	-1.33319		0	NaN
PRKACA;KIN27	cAMP-dependent protein kinase catalytic subunit alpha	+	8	49.9	0	157.03	32752000000	-1.3007	-1.25219	-1.2227	2.16566	2.16269	2.15306	-1.09111	-1.08832	-1.05967	2.06654	2.08757	2.06364	0.618521	0.746743	0.617487	3.19374	2.77486	3.06269	2.08946	0.436055	0.350384	0.310573	1.9915	2.04278	+	4.23016	3.419	+	4.6217	3.15228	+	2.31007	2.34951	+	3.53767	1.67558	+	5.51467	-1.6242	+	5.61109	-1.91945
CAPN2	Calpain-2 catalytic subunit		10	19.6	0	21.855	2155200000	0.0847447	0.147958	0.271306	0.173127	0.301354	0.142087	NaN	0.134221	0.520347	0.542605	0.372506	0.44074	0.270828	-0.098382	0.0144981	0.160533	NaN	0.618239	0.112767	-0.10324	0.0396999	0.28629	0.108491	0.234133		0.152734	0.0375197		0.151649	0.0793392		0.211102	0.246723		0.374078	0.0775472		0.301877	0.093753		0.360632	0.105688
CTPS1	CTP synthase 1		19	44.2	0	69.583	8924100000	0.316262	0.33811	0.284633	0.287591	0.476434	0.289126	0.182947	0.380175	0.339707	0.28629	0.0809305	0.174406	0.496513	0.294665	0.239887	0.266996	0.174023	0.20389	-0.302707	-0.259841	-0.243028	-0.368383	-0.256683	-0.293624		0.272689	0.0380485		0.380815	-0.120401		0.828744	-0.128719		0.0558558	0.00607952	+	3.85549	0.603419		0.143059	-0.0306868
TCP1	T-complex protein 1 subunit alpha		32	71.8	0	186.76	29471000000	0.359184	0.402395	0.466653	0.304628	0.433814	0.391548	0.496922	0.496309	0.361319	0.516116	0.411209	0.395063	0.358846	0.151469	0.427606	0.358284	0.25882	0.260748	-0.0121407	-0.0503531	0.0551957	0.0312541	-0.0721642	-0.182328		0.375475	-0.0327473		0.0961088	-0.0107208		0.0834385	-0.0200231		0.515278	-0.10091	+	3.05428	0.397378		0.473064	0.09677
RPL35A	60S ribosomal protein L35a		3	20.9	0.00057241	3.3832	385770000	NaN	NaN	NaN	-0.26112	NaN	-0.426625	NaN	NaN	-0.153286	-0.07514	NaN	NaN	NaN	NaN	0.156008	NaN	NaN	NaN	NaN	0.437547	NaN	NaN	NaN	NaN		0	NaN		0	NaN		0	NaN		0	NaN		0	NaN		0	NaN
ARF4	ADP-ribosylation factor 4	+	0	70	0	74.142	104340000000	-0.851756	-0.854544	-0.832925	0.345056	0.203139	0.350271	-0.631891	-0.629858	-0.539562	0.330788	0.357158	0.285935	0.656817	0.426426	0.54666	1.40458	1.18085	1.22934	0.244644	-0.138854	-0.148113	-0.15465	0.296311	0.173127	+	2.82681	1.1459	+	2.53152	0.925064	+	3.00618	0.728288		2.12155	0.385233	+	6.94725	-0.699202	+	4.49917	-1.38971
RPL7	60S ribosomal protein L7		21	62.9	0	84.115	37586000000	-0.180119	-0.2122	-0.0957278	-0.249291	-0.178388	-0.178208	0.00705191	0.0268709	-0.0437352	-0.0524161	-0.144632	-0.03354	-0.101892	-0.102248	-0.11466	-0.233871	-0.0823772	-0.192348	0.341303	0.193456	0.309875	0.346872	0.311387	0.219339		0.401183	-0.0392798		0.524477	-0.073592		0.536955	-0.0632654		0.0289726	0.00727519	+	2.81836	-0.446083		0.739553	-0.0564155
VCL	Vinculin		18	52.5	0	323.31	53512000000	0.147567	0.168128	0.213129	0.285106	0.222928	0.233888	0.0821575	0.129349	0.200881	0.195348	0.165172	0.153157	0.0749164	0.124196	0.122474	0.0784732	0.125387	0.162984	-0.313925	-0.351976	-0.406579	-0.35511	-0.311273	-0.357418		0.751886	0.0710324		0.26522	0.0337631		0.446441	0.0150857		0.580205	0.0436827	+	4.50663	0.547497		1.28488	0.0690797
PGAM1	Phosphoglycerate mutase 1		12	63.8	0	117.53	30210000000	-0.511896	-0.523463	-0.51274	-0.555969	-0.599834	-0.587164	-0.454882	-0.615751	-0.616591	-0.543993	-0.435944	-0.52849	-0.493906	-0.526203	-0.509738	-0.556436	-0.521038	-0.604608	-0.312187	-0.230178	-0.260999	-0.291115	-0.313603	-0.304309		1.60294	-0.064956		0.276552	0.0595993		0.643497	-0.0507453		0.879252	-0.049269	+	3.84479	-0.255269		0.238665	-0.00608418
NCL	Nucleolin		18	27.9	0	104.35	14033000000	-0.0430067	-0.103271	-0.0539729	-0.160895	-0.227422	-0.238408	-0.0744107	0.0688771	0.0723116	0.117695	0.0446039	-0.0592845	-0.147186	-0.0666993	0.087327	0.0277203	-0.00223794	-0.0689978	-0.0834011	-0.261327	-0.255494	-0.342671	-0.265015	-0.162267		1.66645	-0.142158		0.040654	0.0120788		0.0953262	0.027681		0.686603	0.11627	+	2.5446	0.219747		0.126305	-0.024564
HK1	Hexokinase-1		6	10.8	0	15.411	555810000	-0.255305	0.311736	NaN	0.0710762	NaN	-0.0877947	NaN	0.315914	NaN	-0.121738	NaN	0.108625	NaN	NaN	-0.125872	-0.176577	-0.252363	-0.0238417	-0.159025	-0.165208	-0.207894	0.0833836	-0.30668	NaN		0	0.326381		0	NaN		0	0.10203		0.267774	-0.0463017		0.19297	0.124788		0	0.154087
SRM	Spermidine synthase		5	21.9	0	17.716	1941500000	NaN	-0.481405	-0.574498	-0.510436	NaN	-0.729005	NaN	-0.498301	NaN	-0.492525	NaN	NaN	-0.656103	-0.46168	0.0167816	NaN	NaN	NaN	-0.116473	-0.367471	-0.351185	-0.202356	-0.00895804	0.033652		0	-0.154507		0	NaN		0	NaN		1.85034	0.276411		1.20421	-0.220947		0.236339	-0.16095
ATP2B1	Plasma membrane calcium-transporting ATPase 1;Calcium-transporting ATPase		6	8.5	0	6.2936	890760000	NaN	0.306029	-0.684341	NaN	NaN	NaN	NaN	0.0526941	NaN	NaN	NaN	NaN	NaN	NaN	NaN	NaN	NaN	NaN	NaN	NaN	-0.707289	NaN	0.0606008	NaN		0	NaN		0	NaN		-4.34e-08	0		0	0.76789		0	0.518133		0	NaN
EIF2S2	Eukaryotic translation initiation factor 2 subunit 2		13	41.1	0	75.658	5241600000	0.529071	0.645333	0.645978	0.259182	0.270708	0.332851	0.440952	0.464459	0.533264	0.357833	0.49917	0.239276	0.277985	0.517729	0.287709	0.136716	0.11703	0.19774	-0.548333	-0.466915	-0.646903	-0.679203	-0.481545	-0.664014		2.04864	-0.319214		0.44723	-0.114132		0.796143	-0.210646		0.160815	0.0330431	+	4.01914	1.20447		1.31544	0.245653
ANXA7	Annexin A7		14	33.5	0	37.91	4038000000	0.0606008	0.241718	0.440633	0.205893	0.193456	0.554638	0.326537	-0.130507	0.106348	0.285225	-0.016585	0.0756011	0.000576887	0.0836559	0.0385766	0.28404	0.354565	0.0173518	-0.655785	-0.912782	-0.705712	-0.725995	-0.503405	-0.716671		0.441657	0.0703449		0.0932993	0.0139542		0.665319	0.177716		0.761684	0.156209	+	2.88626	1.02915		0.85514	0.206714
PSMB1	Proteasome subunit beta type-1		6	34.9	0	25.632	2549000000	0.569491	NaN	-0.748772	-0.0270721	NaN	-0.589377	0.0993626	-0.769207	NaN	-1.28268	NaN	-0.405127	NaN	-0.248845	-0.387336	NaN	NaN	NaN	0.0690147	-0.0347957	-0.106731	0.176067	-0.220631	-0.200747		0.176386	-0.218584		0	-1.38205		0	NaN		0.345529	-0.128968		0.0687542	-0.101154		0.117364	0.22845
GSTM3	Glutathione S-transferase Mu 3		17	81.8	0	74.804	12374000000	0.414352	0.407081	0.428893	0.355016	0.366476	0.339479	0.490365	0.307662	0.420078	0.497025	0.627327	0.531169	0.49917	0.419431	0.512783	0.51652	0.655443	0.613343	0.873577	0.743989	0.794769	0.818033	0.791772	0.872868		1.32634	-0.0631179		0.595334	0.145805		0.687585	0.117974		0.592157	0.0604756	+	4.06971	-0.368822		0.94719	-0.0603528
CSRP1	Cysteine and glycine-rich protein 1		7	50.8	0	45.086	5205600000	-0.150449	-0.0898814	0.0255958	0.0295589	0.0122111	0.0905825	-0.0764781	-0.184851	-0.187214	-0.322812	-0.310683	-0.255184	-0.290551	0.252416	-0.283123	-0.328417	-0.0723463	-0.240691	-0.0215115	-0.100329	-0.10507	-0.181182	-0.290692	-0.111695		1.11834	0.115696		0.967072	-0.146712		0.357239	-0.106732		0.0462446	-0.012439		0.421908	0.0572822		0.066172	0.0355078
FLNA	Filamin-A		90	53.8	0	323.31	92708000000	0.278936	0.189793	0.241718	0.201007	0.209641	0.288181	0.265317	0.257976	0.320773	0.278223	0.198871	0.280006	0.144829	0.163885	0.157561	0.154583	0.0747794	0.188654	0.557974	0.54666	0.535555	0.588804	0.539432	0.596744		0.0325591	-0.00387302		0.506216	-0.0289888		0.15099	-0.0160863		1.1566	0.00771002	+	3.33118	-0.320191		1.43138	0.0813905
ACO1	Cytoplasmic aconitate hydratase		5	10.2	0	11.932	8171000000	NaN	NaN	NaN	NaN	NaN	NaN	NaN	-0.296368	NaN	NaN	NaN	NaN	NaN	NaN	NaN	NaN	NaN	NaN	-0.199984	NaN	0.203139	-0.0748665	-0.228216	-0.310218		-4.34e-08	0		0	NaN		-4.34e-08	0		0.739858	-0.333353		0	NaN		-4.34e-08	0
VDAC1	Voltage-dependent anion-selective channel protein 1		17	74.9	0	226.87	103440000000	3.00911	2.7844	2.5139	2.85515	3.09454	2.81013	1.43883	1.58029	1.36597	1.57995	1.60113	1.45654	0.447949	0.60065	0.558366	0.994725	0.889084	0.759241	-0.852772	-0.875725	-0.862523	-0.846065	-0.859431	-0.911723		0.369787	0.150806		0.862737	0.084178		1.0984	0.345361		0.172945	-0.0132041	+	4.83984	3.63057	+	3.92381	2.23348
COMT	Catechol O-methyltransferase		7	31.7	0	31.959	3740800000	0.960808	0.561888	0.896853	0.686075	NaN	NaN	0.505891	NaN	NaN	0.722116	0.776441	0.363676	0.236829	0.28889	NaN	0.0633648	NaN	NaN	0.087327	-0.285319	-0.129513	-0.0832177	-0.148737	-0.170897		0	-0.274734		0	0.216225		0	-0.173465		0.222047	0.088581	+	2.67034	0.972533	+	1.36544	0.543657
TGM2	Protein-glutamine gamma-glutamyltransferase 2		7	14.1	0	18.784	526160000	0.57947	1.16915	NaN	1.27834	1.49508	NaN	NaN	NaN	NaN	0.810237	NaN	NaN	NaN	0.698396	NaN	NaN	NaN	1.01343	0.882526	0.998629	NaN	0.660655	0.984115	0.865206		0.653266	0.512399		0	NaN		0	NaN		0.0816248	0.0442241		0.0421767	0.0446707		0	0.175916
GART	Trifunctional purine biosynthetic protein adenosine-3;Phosphoribosylamine--glycine ligase;Phosphoribosylformylglycinamidine cyclo-ligase;Phosphoribosylglycinamide formyltransferase		14	18.1	0	69.44	5678000000	0.0673633	0.106348	0.247442	0.0164963	0.290189	0.262914	0.367259	-0.0452975	0.0832474	0.158466	0.295253	0.155102	-7.21e-05	-0.013407	0.160146	0.169027	-0.0148931	-0.025177	-0.213638	-0.0679085	-0.289228	-0.228757	-0.0583978	0.169027		0.257936	0.0494819		0.148519	0.0678705		0.0180706	-0.00590324		0.374562	0.160961	+	1.76125	0.335682		0.513612	0.0914955
PAICS	Multifunctional protein ADE2;Phosphoribosylaminoimidazole-succinocarboxamide synthase;Phosphoribosylaminoimidazole carboxylase		21	65.9	0	108.02	21971000000	-0.170215	-0.174361	-0.202024	-0.306217	-0.238647	-0.133875	-0.127337	-0.0571065	-0.0532392	-0.199139	-0.24243	-0.128014	-0.229568	-0.11129	-0.132246	-0.0936327	-0.138775	-0.156884	-0.201062	-0.127069	-0.294261	-0.248828	-0.324184	-0.301835		0.269181	-0.044046		1.01055	-0.110634		0.182784	0.0279373		1.26432	-0.0523078		0.333649	0.0411857		0.258016	-0.0244988
SCP2	Non-specific lipid-transfer protein		21	38	0	138.12	26448000000	4.12093	4.16213	4.32438	4.26446	4.31201	3.72563	1.77467	3.08663	3.48156	3.63564	3.40272	3.66528	3.15337	3.59204	3.10202	3.36933	3.102	3.33314	-1.08213	-1.46626	-1.28789	-1.36777	-0.9127	-1.03292		0.141576	-0.101778		0.550792	0.786927		0.0188719	-0.0143195		2.76382	0.364721	+	6.57977	5.57645	+	2.27195	0.920005
UBA1	Ubiquitin-like modifier-activating enzyme 1		37	50.4	0	285.53	59351000000	0.040682	-0.00623147	-0.0210868	-0.0113553	-0.0147182	-0.010178	0.0699771	0.195348	0.105008	0.070252	0.0832474	0.109962	-0.00484117	-0.00923391	-0.0144996	0.0851526	-0.0125918	0.0462816	0.278817	0.319618	0.338795	0.321813	0.324926	0.364909		0.329783	-0.0165384		0.346669	-0.0356235		0.664268	0.049139		0.0504375	-0.00385809	+	4.09853	-0.322287		0.301973	0.0139795
NME1-NME2;NME2;NME1;NME2P1	Nucleoside diphosphate kinase;Nucleoside diphosphate kinase B;Putative nucleoside diphosphate kinase		6	69.5	0	75.092	43966000000	0.0352017	0.139076	0.123534	0.0415233	0.101247	0.106348	0.107956	0.0878702	0.0928839	0.165944	0.166844	0.176323	0.203389	0.14991	0.111031	0.136585	0.115832	0.0558898	-0.584328	-0.610103	-0.573553	-0.682951	-0.547911	-0.680313		0.480053	-0.0162312		1.95025	0.073467		1.49116	-0.0520076		0.842042	0.0180183	+	4.02997	0.721473		0.590529	-0.0555061
HNRNPA2B1	Heterogeneous nuclear ribonucleoproteins A2/B1		10	33.1	0	37.024	4244300000	-0.165192	-0.373421	-0.375965	-0.484469	-0.446266	-0.43335	-0.167944	-0.00627491	0.0951818	-0.236401	-0.229924	-0.244788	0.0909888	-0.330628	-0.188151	-0.0879941	-0.358953	-0.521639	-0.419372	-0.100561	-0.180822	-0.227726	-0.385921	-0.192826		0.658741	-0.149836		0.936828	-0.210692		0.751163	-0.180265		0.587759	-0.163004		0.788702	-0.135156		0.498403	-0.162262
RFX1	MHC class II regulatory factor RFX1		8	11.3	0	23.911	1724300000	NaN	NaN	NaN	NaN	NaN	NaN	0.41792	0.067088	-0.103038	0.075738	0.0628125	0.0380147	-0.767241	-0.750979	-0.609596	-0.664837	-0.485499	-0.84744	NaN	NaN	NaN	NaN	NaN	NaN		-4.34e-08	0		0.167743	-0.0684681		0.0982404	0.043347		-4.34e-08	0		-4.34e-08	0		0	NaN
PRKACB	cAMP-dependent protein kinase catalytic subunit beta	+	7	56.7	0	43.937	6424600000	-0.789561	-0.906007	-0.829331	1.58919	1.54537	2.05346	-0.720802	-0.618628	-0.606057	1.99581	1.09822	1.34659	0.709644	1.11617	1.00173	2.71145	NaN	NaN	2.42124	0.261711	0.547351	0.673014	1.91609	NaN	+	2.4291	2.57097	+	1.70983	2.1287		0	2.00181		0.852743	1.76413	+	3.34318	-1.33566	+	3.84362	-1.78415
UQCRC2	Cytochrome b-c1 complex subunit 2, mitochondrial		13	38	0	46.068	2665500000	-0.265032	0.0110662	-0.473731	-0.320883	-0.314033	-0.172685	-0.840526	-0.961086	-0.827384	NaN	-0.884221	-0.971289	-0.78421	-0.803569	-1.01022	-0.894483	-0.434734	-0.904953	-0.608716	-0.249291	-0.353579	-0.670658	-0.731997	-0.605903		0.0473529	-0.0266344		0.0902751	-0.0335198		0.324522	0.121277		0.583236	-0.224363		0.408382	0.181944	+	1.77329	0.623434
SFPQ	Splicing factor, proline- and glutamine-rich		4	10.6	0	16.534	741160000	NaN	NaN	NaN	NaN	NaN	NaN	NaN	NaN	NaN	NaN	NaN	NaN	NaN	NaN	NaN	NaN	NaN	NaN	0.0848807	NaN	-0.187017	-0.484086	-0.168561	-0.356218		-4.34e-08	0		-4.34e-08	0		-4.34e-08	0		0.388553	0.0731623		0	NaN		-4.34e-08	0
PPIB	Peptidyl-prolyl cis-trans isomerase B		13	56	0	26.966	9353000000	-0.17524	-0.310468	-0.255649	-0.232803	-0.408053	-0.387676	-0.41108	-0.29343	-0.328399	-0.324202	-0.19962	-0.202107	-0.398475	-0.408818	-0.521121	-0.414287	-0.344666	-0.385337	0.156397	0.301822	0.192194	0.153676	0.0996318	0.278461		1.328	-0.0957244		1.86	0.102327		0.528662	0.0613744		0.159341	-0.0377342	+	2.83925	-0.463017		1.6131	0.195685
WARS	Tryptophan--tRNA ligase, cytoplasmic;T1-TrpRS;T2-TrpRS		10	31.2	0	61.592	7278900000	0.0416635	0.155879	0.187134	-0.0933864	-0.158317	0.352307	0.0788831	0.176323	0.344488	0.218967	0.222681	0.343578	-0.1811	-0.0510554	-0.192563	0.0723116	0.248535	0.152768	-0.000663834	-0.0258232	0.18053	0.0588013	0.0844725	0.0753272		0.245533	-0.094691		0.562144	0.0618443		2.11008	0.299444		0.162316	-0.018124		0.313247	0.0570562	+	1.88374	0.269798
RPS3	40S ribosomal protein S3		19	80.2	0	96.917	28116000000	0.40806	0.352871	0.392867	0.333882	0.341758	0.364012	0.42417	0.577828	0.532666	0.45628	0.358059	0.407516	0.317072	0.34153	0.23842	0.36446	0.277866	0.419647	-0.127589	-0.200084	-0.074593	-0.0574667	-0.115535	-0.166017		0.744827	-0.0380487		0.535234	-0.104269		0.285134	0.0549833		0.170666	-0.0256658	+	3.3075	0.495314		1.14379	0.0855917
AHCY	Adenosylhomocysteinase		18	45.1	0	84.414	16246000000	-0.502873	-0.598828	-0.487561	-0.655899	-0.45504	-0.583225	-0.43374	-0.431618	-0.420453	-0.373907	-0.374729	-0.529385	-0.446227	-0.478788	-0.455119	-0.497507	-0.442458	-0.450282	-0.134208	-0.148833	-0.165499	-0.18848	-0.119432	-0.115441		0.132223	-0.0349672		0.0145298	0.0025965		0.0422102	-0.0033705		0.926506	0.0445768	+	3.22943	-0.36215		0.899453	-0.0697093
CFL1	Cofilin-1		11	77.7	0	219.04	75317000000	-0.122366	-0.0886076	-0.0944488	-0.0367775	-0.01749	-0.0610443	0.0536674	-0.10524	0.0781998	-0.0537782	0.0367495	0.0377336	0.0888201	0.0852886	0.0942361	0.0367495	0.00662125	0.041243	0.407516	0.344374	0.453228	0.437334	0.321582	0.352984		1.2573	0.0633701		0.00820883	-0.00197398		1.70645	-0.0612437		0.321819	-0.0509513	+	3.8762	-0.513453	+	4.23391	-0.191256
CPT2	Carnitine O-palmitoyltransferase 2, mitochondrial		2	4.1	0	5.7929	280220000	NaN	NaN	NaN	NaN	NaN	NaN	NaN	NaN	NaN	NaN	NaN	NaN	NaN	NaN	NaN	NaN	NaN	NaN	-1.13432	NaN	-0.493215	NaN	-0.921554	NaN		-4.34e-08	0		-4.34e-08	0		-4.34e-08	0		0	-0.428339		0	NaN		-4.34e-08	0
DTYMK	Thymidylate kinase		16	63.7	0	43.174	6456900000	1.37518	1.27977	1.36351	1.26243	1.28078	1.32849	0.823342	1.06819	0.909965	0.896311	1.01821	1.31869	0.908429	0.744247	0.921055	0.966504	1.21226	0.710349	-1.30814	-1.16679	-1.11388	-1.11254	-1.00422	-1.18256		0.549208	-0.0489171		0.393645	0.143905		0.18877	0.105127		0.158429	-0.0339032	+	6.61942	2.47055	+	2.76731	0.481574
RRM1	Ribonucleoside-diphosphate reductase large subunit		18	34.5	0	82.162	23702000000	0.0422241	-0.22678	-0.141414	-0.185868	-0.16196	-0.120137	-0.0607734	-0.520293	-0.217977	-0.0594047	-0.321099	-0.22265	0.216113	0.147437	0.302407	-0.02056	-0.191047	-0.207828	-0.343476	-0.262054	-0.22874	-0.334971	-0.222027	-0.249325		0.183326	-0.0473317		0.364119	0.065297		1.34302	-0.361797		0.0238088	0.00364553		0.911353	0.166598	+	1.65344	-0.330642
KDELR1	ER lumen protein-retaining receptor 1;ER lumen protein-retaining receptor		3	26.9	0	80.002	14881000000	2.73005	2.58191	2.51992	2.63234	2.79871	2.69243	1.54483	1.17753	1.29084	1.40849	NaN	NaN	-0.108441	0.350497	0.0754641	0.452174	0.766638	0.137897	-1.51181	-1.52708	-1.22942	-1.04335	-1.12936	-1.38315		0.369621	0.0972006		0	-0.136337		0.8414	0.346396		0.197594	-0.0748274	+	4.82986	3.87724	+	4.1552	2.50479
EEF1B2	Elongation factor 1-beta		6	41.3	0	121.17	18944000000	-0.532178	-0.382062	-0.471469	-0.493439	-0.420202	-0.442654	0.0106367	-0.286093	-0.343787	-0.329141	-0.312455	-0.303419	-0.394145	-0.311667	-0.0345297	-0.342781	-0.256425	-0.254358	-0.561558	-0.589768	-0.519983	-0.580957	-0.424707	-0.394904		0.140269	0.00980485		0.34492	-0.108591		0.14343	-0.0377404		0.816106	0.10318		0.976076	0.101666		0.853046	-0.215122
ATP5F1	ATP synthase F(0) complex subunit B1, mitochondrial		8	39.1	0	44.964	6714500000	0.64321	0.326077	0.703987	0.547351	0.651132	0.605399	0.0565835	0.0988237	0.0285691	-0.00137118	0.118227	0.158466	-0.140666	-0.0861858	-0.228554	0.0216219	0.0370308	-0.0458186	-0.0209258	-0.237065	0.0549179	-0.0346184	0.0206267	-0.0224489		0.104386	0.0435365		0.19885	0.0304485		1.91068	0.15608		0.31075	0.0646723	+	1.90781	0.630013	+	2.33211	0.70956
ACP1	Low molecular weight phosphotyrosine protein phosphatase		4	32.9	0	6.3379	2786000000	NaN	-0.83475	-0.477542	-0.635092	-0.534934	-0.483339	-1.0081	NaN	NaN	-0.363401	-0.64844	-0.283457	NaN	-1.70599	NaN	NaN	-0.639647	-0.622177	NaN	-0.241322	-0.223323	-0.339163	-1.00058	-0.197484		0.290469	0.14701		0	0.644701		0	1.06635		0.211278	-0.317788	+	1.15152	-0.388211		0	1.04985
ACAT1	Acetyl-CoA acetyltransferase, mitochondrial		6	17.1	0	35.783	1637500000	-0.0646609	NaN	NaN	0.0329472	NaN	NaN	-1.05838	-1.1489	-1.00514	-1.0454	NaN	-1.37951	-0.625378	NaN	-0.651994	NaN	-0.962773	-1.10731	-0.472009	-0.288998	-0.27228	-0.181738	-0.297041	-0.351903		0	0.0976081		0.282275	-0.180691		0	-0.455312		0.882427	-0.125979		0	0.183011		0	0.574025
MCM3	DNA replication licensing factor MCM3		19	29.5	0	40.519	5171700000	0.15069	-0.0090887	-0.209428	-0.139315	-0.0563862	-0.00111126	0.324004	-0.0101489	0.10044	0.422664	0.118094	0.260628	0.515309	-0.0105412	NaN	0.300651	0.0460021	0.211635	0.409364	0.237197	0.212009	0.206893	0.119423	0.260989		0.100591	-0.0429952		1.73433	0.12903		0.177853	-0.0790573		0.207963	0.0445589		1.0846	-0.241309		0.480117	-0.274993
MPST	3-mercaptopyruvate sulfurtransferase;Sulfurtransferase		3	18.5	0	11.329	599820000	-0.346665	NaN	NaN	NaN	NaN	NaN	NaN	NaN	NaN	NaN	NaN	NaN	NaN	NaN	-0.537759	NaN	NaN	NaN	NaN	NaN	0.320658	-0.118038	-0.0625652	NaN		0	NaN		-4.34e-08	0		0	NaN		0	-0.383223		0	-0.447975		0	0.191095
RPS12	40S ribosomal protein S12		7	70.5	0	175.89	48261000000	-0.00695607	0.015783	0.0951818	-0.0116898	0.00388999	-0.00501486	0.0368901	0.159629	0.166201	0.147958	0.120086	0.0927488	0.0137839	0.186754	-0.00740554	0.126444	0.146004	0.0989585	0.297133	0.208517	0.367147	0.410341	0.322043	0.266877		0.478508	-0.0389411		0.00349316	-0.000642466		0.446674	0.0594246		0.174316	-0.0333177	+	1.89046	-0.293999		0.162196	-0.0297079
ATP5A1	ATP synthase subunit alpha, mitochondrial		24	50.1	0	253.1	49281000000	0.0513026	0.00432164	0.1149	0.155749	0.1956	0.204266	-0.209412	-0.147857	-0.131329	-0.0763563	-0.228317	-0.149041	-0.173628	-0.212668	-0.158639	-0.140857	-0.207161	-0.129639	0.0153548	-0.10132	-0.099309	-0.115332	-0.0258819	-0.0891906		1.251	0.128363		0.0598292	0.0116279		0.923305	0.0224257		0.957735	0.0720809		2.12536	0.162162	+	2.57603	0.238486
PSMA1	Proteasome subunit alpha type-1		12	45.2	0	28.433	3566500000	-0.346518	-0.238187	-0.354926	-0.272367	-0.328199	-0.305574	-0.263473	0.0182068	-0.360064	-0.437037	-0.0605176	-0.124	-0.17345	-0.103209	-0.0363927	-0.0826675	-0.22196	-0.382908	0.136191	-0.153126	-0.13204	-0.0736665	-0.082301	-0.0712999		0.0719565	0.0111633		0.0136199	-0.00540809		0.36949	-0.124828		0.483409	0.113808	+	1.91628	-0.193599		1.72889	-0.20886
PSMA3	Proteasome subunit alpha type-3		7	30.2	0	17.363	2483600000	-0.549747	-0.914031	-0.360434	-0.667332	-1.04632	NaN	-0.924947	-0.0429026	-0.587468	1.18897	-0.806998	-0.839854	-1.57493	-0.902524	-0.330266	NaN	-0.367862	0.288654	NaN	-0.145382	-0.285583	0.0608775	-0.00476878	-0.28847		1.42679	-0.124939		0.14274	0.365812		1.33333	0.576791		0.0310337	-0.0342666	+	1.19238	-0.484708		0.344021	0.327835
PSMA4	Proteasome subunit alpha type-4;Proteasome subunit alpha type;Proteasome subunit beta type		5	39.8	0	50.007	7558800000	-0.532658	-0.451761	-0.362343	-0.722777	-0.655535	-0.387317	-0.0605778	-0.592027	-0.532428	-0.396916	-0.492363	-0.603095	-0.422617	-0.577724	-0.132214	-0.270417	-0.652629	-0.317157	-0.249908	-0.230956	-0.0971315	-0.0737425	0.0291349	-0.311793		0.867357	-0.139622		0.297458	-0.102447		0.123582	-0.0358826		0.142319	-0.0435786	+	1.97825	-0.314977		0.19669	-0.0714023
ITGA3	Integrin alpha-3;Integrin alpha-3 heavy chain;Integrin alpha-3 light chain		7	7.2	0	13.883	1106100000	1.01628	1.04509	1.22243	1.45807	1.26586	1.29643	NaN	1.48032	1.28989	1.42126	3.93979	1.37434	0.587173	0.766213	0.601697	0.949946	0.726831	NaN	NaN	2.39127	2.31826	NaN	2.08763	2.33548		0.828371	0.245514		0.320437	1.27196		0.245009	0.161695		0	-0.230626	+	3.13859	-1.26016	+	2.1654	0.442909
MSN	Moesin		23	53.9	0	152.62	45663000000	0.366588	0.341417	0.337996	0.283211	0.275126	0.304745	0.274172	0.361881	0.408603	0.332393	0.375179	0.280125	0.247563	0.229957	0.276199	0.196229	0.257493	0.30871	-0.0614959	-0.215798	-0.166616	-0.189137	-0.129292	-0.22825		1.27096	-0.0609731		0.114703	-0.0189866		0.0340547	0.0029048		0.335884	0.0508379	+	5.24709	0.539184		2.4134	0.0974274
DDX6	Probable ATP-dependent RNA helicase DDX6		6	20.1	0	14.677	1278000000	-0.375702	0.213005	-0.497955	NaN	-0.147969	-0.367862	NaN	NaN	NaN	NaN	NaN	NaN	NaN	-0.357548	NaN	NaN	NaN	NaN	-0.181428	-0.59342	-0.457415	-0.126407	-0.375066	-0.550507		0.142542	-0.115441		-4.34e-08	0		0	NaN		0.0305524	0.0234137		0.264866	0.172197		0	0.137331
CTNNA2	Catenin alpha-2		3	9.9	0	9.8705	2670000000	0.0119249	NaN	0.208517	NaN	NaN	NaN	NaN	NaN	NaN	0.4609	NaN	NaN	NaN	NaN	NaN	NaN	NaN	NaN	NaN	NaN	NaN	0.575603	NaN	NaN		0	NaN		0	NaN		-4.34e-08	0		0	NaN		0	-0.465382		0	NaN
U2AF2	Splicing factor U2AF 65 kDa subunit		10	32.5	0	39.869	5742200000	-0.0652646	0.090447	0.15017	0.144829	-0.174735	0.157949	0.329181	0.416732	NaN	0.277509	NaN	0.455755	NaN	0.744506	0.55562	0.66339	0.361544	NaN	-0.345693	-0.502587	-0.556627	-0.658105	-0.363754	-0.30155		0.0365483	-0.0157696		0	-0.0516722		0	-0.382962		1.20866	0.235441	+	2.88047	0.63089	+	1.91374	-0.591612
RPL13	60S ribosomal protein L13		18	56.9	0	262.65	152900000000	-0.164658	-0.182295	-0.118476	-0.295146	-0.202838	-0.201145	-0.0183081	0.0581087	0.113834	-0.0505473	0.00762616	-0.0348844	-0.167474	-0.0934941	-0.102202	-0.0669108	-0.0613454	-0.0490688	0.0870554	0.0754641	0.145221	0.138159	0.155102	0.151729		0.872416	-0.0778997		0.778404	-0.0771467		1.03534	0.0619485		2.08483	0.0116806	+	3.14728	-0.274758		0.493541	-0.0340862
S100A4	Protein S100-A4		6	42.6	0	19.566	40177000000	0.093425	0.142217	-0.016585	0.0597706	0.186501	0.0802483	-0.136331	-0.433682	-0.187707	-0.0618422	-0.169307	-0.10132	-0.272036	-0.3002	-0.257718	-0.150129	-0.26029	-0.170329	-0.777937	-0.685826	-0.707949	-0.61288	-0.650318	-0.623443		0.352218	0.0358207		0.83178	0.141751		1.13656	0.0830685		0.118172	-0.0150146	+	3.75598	0.741904	+	2.70411	0.34967
TARS	Threonine--tRNA ligase, cytoplasmic		35	54.5	0	234.5	52839000000	0.117562	0.198368	0.240375	0.104739	0.0343565	0.14978	0.157432	0.180784	0.196733	0.160146	0.0777899	0.145221	0.107688	0.142348	0.0482362	0.103263	0.136848	0.123401	0.100843	0.195348	0.194717	0.171719	0.189919	0.28558		0.749876	-0.0891435		0.621255	-0.0505975		0.300087	0.0217464		0.0253834	0.00485264		0.0164325	-0.0018261		0.88419	0.0860113
VARS	Valine--tRNA ligase		14	14.2	0	33.084	2393100000	-0.249342	-0.0211454	-0.0260141	-0.307484	-0.368421	-0.492383	0.178619	0.135535	-0.0337615	-0.319604	NaN	-0.132183	-0.160943	-0.338068	-0.135998	-0.0964063	0.0261627	-0.237302	-0.345308	-0.0758089	-0.0735147	0.0425042	-0.160089	-0.250921		0.857996	-0.290595		0.424999	-0.298322		0.294954	0.109154		1.09558	-0.216499		0.303354	-0.0632274		0.500236	0.112836
EEF1G	Elongation factor 1-gamma		28	74.8	0	252.55	54901000000	-0.227118	-0.192002	-0.208494	-0.256959	-0.172961	-0.178339	-0.0680901	-0.0166871	-0.136839	-0.153463	-0.102155	-0.115457	-0.0905264	-0.103023	-0.0753224	-0.113208	-0.136839	-0.165774	-0.729579	-0.608144	-0.660087	-0.605091	-0.622177	-0.683901		0.11936	0.00645163		0.527791	-0.0498197		0.839539	-0.048983		0.427467	-0.0541112	+	4.45283	0.415236		3.11998	-0.119581
STOM	Erythrocyte band 7 integral membrane protein		15	60.8	0	259.82	63845000000	0.24123	0.223423	0.378068	0.152248	-0.0184834	0.254231	-0.320937	-0.250114	-0.14417	-0.174719	-0.248982	-0.362139	0.419863	0.284988	0.379399	0.161565	0.181675	0.196859	1.32112	1.09694	0.944634	1.3297	1.04928	1.13999		1.08667	-0.151575		0.0733184	-0.0235401		1.25332	-0.181383		0.12939	0.0463759	+	2.63566	-0.842849		0.566827	-0.0805097
YWHAQ	14-3-3 protein theta		12	59.2	0	295.51	47436000000	0.237441	0.31545	0.306496	0.226015	0.134352	0.33411	0.240375	0.304978	0.445939	0.22885	0.292664	0.30147	0.221939	0.325732	0.232538	0.288536	0.26123	0.245131	-0.0418181	-0.0736817	-0.06252	-0.043631	-0.0202966	-0.0980268		0.317606	-0.0549697		0.478976	-0.0561027		0.0412601	0.00489583		0.0704975	0.0065638	+	3.72596	0.346407		0.254666	0.0263929
RPL10	60S ribosomal protein L10		4	54.7	0	110.86	29934000000	-0.0845174	-0.109623	-0.0219948	-0.118288	-0.182721	-0.155743	-0.103457	0.0255958	-0.0731352	-0.193866	-0.199106	-0.102837	-0.23399	-0.306645	-0.343019	-0.348537	-0.0950959	-0.193635	-0.0470701	-0.0752008	-0.0124172	0.0211954	0.000576887	-0.0589689		0.958015	-0.0802055		0.73475	-0.114938		0.303065	0.0821285		0.132094	-0.0130132		0.57859	-0.0499043	+	2.241	0.222506
APEX1	DNA-(apurinic or apyrimidinic site) lyase;DNA-(apurinic or apyrimidinic site) lyase, mitochondrial		12	58.2	0	90.15	13133000000	-0.176756	-0.369464	-0.189236	-0.212083	-0.151923	-0.518908	-0.280597	-0.200946	-0.18097	-0.0367922	-0.0336286	-0.0743195	-0.294456	-0.319442	-0.439383	-0.291822	-0.200332	-0.14717	0.218967	0.173	0.20201	0.237686	0.187894	0.224905		0.104956	-0.0491525		1.30974	0.172591		0.615038	0.137985		0.108621	0.00635674	+	2.63869	-0.449384		0.621315	0.105941
CD82	CD82 antigen;Tetraspanin		5	22.5	0	37.324	9818300000	0.859652	0.615699	0.904735	1.05804	1.09471	1.06109	0.582652	0.332737	0.562865	0.598651	0.586212	0.573859	2.41684	1.20602	1.7936	1.1119	0.592828	1.38333	2.23143	1.756	2.03055	2.26709	2.0106	1.86152		0.954282	0.277916		0.440054	0.0934895		0.986161	-0.776135		0.0204954	0.0166398	+	2.67887	-1.22452	+	1.31335	-1.01213
CALR	Calreticulin		11	34.1	0	44.41	29075000000	-0.270156	-0.354852	-0.353118	-0.383228	-0.377538	-0.50666	-0.431034	-0.616304	-0.506394	-0.565972	-0.62872	-0.70908	-0.452609	-0.525995	-0.391778	-0.483521	-0.522613	-0.605947	0.25882	0.214622	0.18409	0.0434844	-0.00965501	0.308477		0.885406	-0.0964336		0.766753	-0.11668		0.449529	-0.0805662		0.097578	0.038482	+	2.86504	-0.473441		1.28225	0.130752
CANX	Calnexin		35	48.8	0	182.83	108290000000	0.249263	0.214249	0.293606	0.191436	0.16633	0.166715	0.90273	0.978781	0.837782	0.838024	0.703809	0.701948	-0.244565	-0.218766	-0.193074	-0.116082	-0.164739	-0.0994017	1.05908	0.878294	1.01942	0.948302	0.967021	0.958805		1.05015	-0.0775456		0.906127	-0.158504		1.29682	0.0920609		0.240611	0.0462974	+	3.92632	-0.696298	+	4.17628	0.471175
PSMA5	Proteasome subunit alpha type-5		9	44.4	0	54.306	7124800000	0.00834347	-0.28179	-0.147729	-0.236079	-0.469949	-0.297059	-0.385921	-0.352455	-0.131566	-0.454842	-0.116551	0.233275	-0.337321	-0.0220094	-0.254117	-0.0147619	-0.187149	-0.0663971	0.0666747	0.0768327	0.0197731	-0.0871662	0.0285691	0.0756011		1.70647	-0.19397		0.519995	0.177275		0.290956	0.115047		0.367116	0.0538018		0.674414	-0.143538		0.194968	0.0640906
PSMB6	Proteasome subunit beta type-6;Proteasome subunit beta type		4	29.3	0	11.447	2490100000	NaN	NaN	-0.753458	NaN	NaN	-0.394051	NaN	-0.75855	-0.819368	NaN	NaN	-0.00811629	-0.27535	-0.598785	NaN	NaN	NaN	-0.782347	-0.679527	-0.698974	-0.931013	-0.848141	NaN	-1.06969		0	0.359408		0	0.811252		0	NaN		0.25513	-0.101053		0	0.0725846		0	-0.316391
PSMB5	Proteasome subunit beta type-5		9	39.2	0	36.963	2693500000	-0.544435	-0.475956	NaN	-0.551966	-0.614536	-0.630573	-0.478346	-0.333952	-0.309056	-0.349916	-0.0799507	-0.383567	-0.220396	-0.359953	NaN	-0.287748	-0.505513	-0.372505	-0.146324	-0.135237	-0.125164	-0.0461015	-0.201278	-0.26446		0.33214	-0.0730554		0.402572	0.10264		0.649546	-0.106456		0.623455	-0.101853	+	2.56345	-0.408028		0.977044	-0.220021
ABCD3	ATP-binding cassette sub-family D member 3		27	41.9	0	104.08	22879000000	3.12537	2.42465	3.94598	3.43189	3.00829	3.34908	2.79878	2.94009	2.6583	3.25757	3.57628	2.53047	2.38424	2.76713	2.17922	2.38123	2.49955	3.37365	-0.371982	-1.06025	-1.06743	-1.14118	-0.286023	-0.362139		0.0917214	0.0977521		0.526693	0.322383		0.248532	0.307945	+	2.77759	0.749568	+	3.19249	4.25495		0.696647	0.721804
TKT	Transketolase		38	73.5	0	323.31	312720000000	0.291014	0.161694	0.161307	0.188781	0.18409	0.248292	-0.184785	-0.200498	-0.206079	-0.12885	-0.214926	-0.125321	-0.274948	-0.180446	-0.234635	-0.146835	-0.415576	-0.0472639	0.175045	0.132643	0.199876	0.175812	0.259664	0.195348		0.0133721	0.00238232		0.539003	0.0407549		0.0664898	0.0267849		1.13352	0.0405753		0.301918	0.0352281	+	2.97917	0.434682
EEF1D	Elongation factor 1-delta		1	48.8	0	133.25	32472000000	1.26772	1.23168	1.38361	1.17805	1.37879	1.14698	1.46952	1.28706	1.45565	1.60625	1.3544	1.3744	1.1145	1.04838	1.02226	1.13185	1.00367	0.939603	-1.14669	-1.07172	-1.21608	-1.19179	-1.1088	-1.1943		0.189392	-0.0597286		0.229555	0.0409396		0.474484	-0.0366692		0.061219	0.00993681	+	5.55957	2.4542		1.91661	0.232621
ERP29	Endoplasmic reticulum resident protein 29		8	37.5	0	14.688	3326200000	-0.0400518	-0.0945875	-0.453893	0.213503	-0.216468	-0.242601	-0.442066	-0.331917	-0.373869	-0.461939	-0.765351	-0.321784	-0.376508	-0.667378	-0.220917	-0.284458	-0.273814	-0.414114	0.254473	0.339137	0.306262	0.352193	0.583134	0.464355		0.359314	0.114322		0.327972	-0.133741		0.205412	0.097472		0.362471	0.101456	+	1.81048	-0.528709		0.539946	0.225423
PRDX6	Peroxiredoxin-6		17	77.7	0	149.63	58265000000	-0.0500842	-0.0937558	-0.0113989	-0.083233	-0.17275	-0.0452825	-0.13144	-0.0842114	0.000288558	-0.0936327	-0.0459675	-0.0594348	-0.0472191	-0.154554	-0.0415507	-0.105178	-0.0243845	-0.0500543	0.437973	0.445939	0.408712	0.336283	0.399116	0.38405		1.07136	-0.0486755		0.054185	0.00544253		0.129405	0.0212356		0.189266	0.0100685	+	3.44295	-0.448724		0.268236	0.0293617
BLVRB	Flavin reductase (NADPH)		8	47.6	0	29.112	2795400000	2.80077	2.29396	2.09241	1.64819	1.75962	NaN	1.51803	NaN	NaN	1.84611	NaN	NaN	NaN	NaN	NaN	NaN	NaN	1.32256	-1.25168	-1.18639	-0.980939	-1.13128	-1.20613	-1.31269		0.650451	-0.843455		0	0.328081		0	NaN		1.09161	-0.157293	+	4.04151	3.49525		0	NaN
PRDX5	Peroxiredoxin-5, mitochondrial		8	72.8	0	39.101	9911300000	0.173255	-0.102698	0.00633395	0.00647761	-0.0142373	0.0408223	-0.155341	-0.133955	-0.159621	-0.199984	-0.0978107	0.135141	-0.0101925	-0.119166	-0.116051	-0.206628	-0.131961	-0.0369699	0.345169	0.327342	0.286763	0.374177	0.351515	0.328032		0.0614087	-0.0146097		0.347126	0.0954209		0.189907	-0.0433835		0.129682	0.0121448	+	1.64723	-0.303797		0.539714	0.107434
PRDX3	Thioredoxin-dependent peroxide reductase, mitochondrial		8	46.2	0	36.148	9449900000	-0.672543	-0.923879	-0.835136	-0.784359	-0.860321	-0.817257	-1.04925	-0.888942	-1.08878	-1.29828	-1.21715	-1.27059	-0.671255	-0.713497	-0.850376	-0.672359	-0.618362	-0.578413	-0.0724828	-0.114925	-0.045357	0.0866479	-0.0318429	-0.0466379		0.0630179	-0.0101262		1.57122	-0.253021		0.574121	0.121998		0.16602	-0.0257764	+	2.94438	-0.785974		0.289895	-0.0654762
RPL12	60S ribosomal protein L12		9	67.9	0	109.26	8121600000	-0.148721	-0.179073	-0.150689	-0.377444	-0.329359	-0.328381	-0.0654759	0.265797	0.0875986	-0.0101925	-0.360083	-0.155438	-0.26953	-0.0548718	-0.148193	-0.0936943	-0.069013	-0.150897	0.0703893	0.168	0.18916	0.275484	0.40523	0.20063		1.82404	-0.185567		0.518971	-0.271211		0.319028	0.0529966		0.0463638	0.0145349	+	3.37942	-0.370376		0.0102822	-0.00196302
ECHS1	Enoyl-CoA hydratase, mitochondrial		13	54.8	0	98.327	26226000000	0.711935	0.756511	0.707083	0.571337	0.651959	0.692249	-1.85173	-1.83126	-1.88843	-1.80526	-1.86418	-1.92046	-2.25946	-2.1196	-2.17997	-2.12608	-2.11285	-2.16256	0.529371	0.865127	0.666484	0.800827	0.857026	0.956429		0.834574	-0.0866616		0.0774073	-0.00615859		0.488624	0.0525182		0.00630257	0.00346227		0.359773	-0.052303	+	6.52717	2.91152
CMPK1	UMP-CMP kinase		4	26	0	7.0565	510870000	-0.322217	NaN	NaN	-0.128882	NaN	NaN	NaN	-0.155341	NaN	NaN	NaN	NaN	NaN	NaN	NaN	NaN	NaN	NaN	NaN	-0.102915	0.230326	0.375735	NaN	-0.106063		0	0.193335		0	NaN		-4.34e-08	0		0	-0.481798		0	-0.489932		0	NaN
PEBP1	Phosphatidylethanolamine-binding protein 1;Hippocampal cholinergic neurostimulating peptide		9	73.3	0	112.74	9885400000	-0.180741	-0.209662	-0.180937	-0.221085	-0.299596	-0.232735	-0.332753	-0.370471	-0.300946	-0.308073	-0.287589	-0.477221	-0.556627	-0.62231	-0.296155	-0.279249	-0.541933	-0.275891	-0.380221	-0.481485	-0.458069	-0.453893	-0.324907	-0.495268		1.25233	-0.0606923		0.0980249	-0.0229045		0.608864	0.126006		0.451936	0.0643507	+	4.53905	0.274036		1.40321	0.301251
PDIA3	Protein disulfide-isomerase A3		21	58.6	0	283.53	33517000000	-0.179727	-0.327982	-0.187822	-0.330792	-0.503507	-0.341245	-0.467354	-0.385884	-0.459933	-0.540002	-0.457534	-0.505779	-0.500585	-0.547721	-0.580591	-0.587533	-0.561473	-0.507583	0.323312	0.31487	0.227741	0.220701	0.209641	0.158079		2.6267	-0.160004		1.72995	-0.0633814		0.0653997	-0.00923061		0.437577	-0.0240939	+	2.9887	-0.486281	+	2.36322	0.311122
PPP2R1A	Serine/threonine-protein phosphatase 2A 65 kDa regulatory subunit A alpha isoform		23	59.4	0	254.28	56460000000	-0.0256322	0.0326651	0.0928839	-0.0883007	0.0519985	0.0647449	0.0816123	0.00173014	0.0187766	-0.0113408	-0.203851	-0.00171784	-0.0582025	-0.0228154	0.00288247	0.00158601	0.0396999	0.0326651	-0.0361708	-0.0554113	-0.0355348	-0.0681203	-0.00540581	0.0691523		0.37493	-0.0238247		0.72824	-0.106343		1.39555	0.0506955		0.619166	0.062214		1.14349	0.0863277		0.702752	0.0593507
NMT1	Glycylpeptide N-tetradecanoyltransferase 1		5	22.8	0	19.939	34725000000	0.665484	0.563841	0.743903	0.863225	0.457437	0.663117	1.22786	NaN	NaN	NaN	NaN	0.668392	0.782576	0.519643	0.539928	NaN	NaN	NaN	0.212756	-0.378325	-0.373028	-0.214157	0.291368	0.331935		0.0112294	0.00351687		0	NaN		0	NaN	+	2.48416	0.600523	+	3.70362	0.979579		0.165884	0.0436937
HLA-B	HLA class I histocompatibility antigen, B-46 alpha chain;HLA class I histocompatibility antigen, B-15 alpha chain;HLA class I histocompatibility antigen, B-35 alpha chain;HLA class I histocompatibility antigen, B-56 alpha chain;HLA class I histocompatibility antigen, B-53 alpha chain;HLA class I histocompatibility antigen, B-78 alpha chain;HLA class I histocompatibility antigen, B-52 alpha chain;…		0	32.3	0	67.526	6896800000	2.20945	2.25882	2.57855	2.45281	2.48638	2.67193	1.34216	1.06012	1.17012	1.16163	1.23781	1.28741	1.00339	0.779386	0.670659	0.800496	0.883308	0.742351	2.44366	2.81283	2.2803	2.96155	2.55599	2.59512		1.23334	0.188096		0.117325	0.0381537		0.0296064	-0.00909191		0.260468	-0.153303		0.639715	-0.335951	+	3.26713	1.53113
HLA-C	HLA class I histocompatibility antigen, Cw-12 alpha chain;HLA class I histocompatibility antigen, Cw-16 alpha chain;HLA class I histocompatibility antigen, Cw-15 alpha chain;HLA class I histocompatibility antigen, Cw-14 alpha chain;HLA class I histocompatibility antigen, Cw-8 alpha chain;HLA class I histocompatibility antigen, Cw-4 alpha chain;HLA class I histocompatibility antigen, Cw-2 alpha ch…		0	40.7	0	34.886	3700800000	0.352533	2.27542	2.403	1.94894	2.29872	2.41687	0.207393	0.00575919	0.322274	0.124461	0.0687396	0.121546	1.00065	1.05207	1.44361	1.20333	1.06088	0.967095	1.95028	2.35806	2.63383	0.777535	1.94983	2.37292		0.387965	0.544523		0.359945	-0.0735602		0.152087	-0.0883417		0.07731	0.167873		0.100425	-0.246156		0.307643	0.511543
HMOX2	Heme oxygenase 2		2	70.3	0	323.31	134590000000	4.77873	4.23642	4.73368	4.19716	5.11137	4.61877	3.31146	3.23784	3.3591	3.639	3.57592	3.48877	2.94873	2.99063	2.90814	3.12542	3.15275	3.13197	-1.84042	-1.89271	-1.83156	-1.90877	-1.8328	-1.78841		0.0445479	0.0594867		1.22483	0.265097		2.01255	0.187546		0.609316	0.0571371	+	5.48959	6.46062	+	3.13139	1.63378
HMOX2	Heme oxygenase 2		1	69.3	0.0025681	2.0826	805510000	NaN	NaN	NaN	NaN	NaN	NaN	NaN	NaN	NaN	NaN	NaN	NaN	NaN	NaN	NaN	NaN	NaN	NaN	-1.80425	-1.86659	NaN	-1.96123	-1.88257	-1.98159		-4.34e-08	0		-4.34e-08	0		-4.34e-08	0		0.154274	0.0209891		0	NaN		-4.34e-08	0
ADSS	Adenylosuccinate synthetase isozyme 2		10	26.3	0	38.614	3533300000	0.223052	0.237686	0.201007	0.296898	0.380951	0.160404	0.319271	-0.206362	0.266037	0.33308	NaN	0.141956	0.467175	0.41997	0.423632	0.176323	0.657732	0.416948	-0.350375	-0.531406	-0.412789	-0.352068	-0.447328	-0.422617		0.412416	0.0588361		0.243699	-0.055136		0.0418435	-0.0199251		0.109124	0.0253144	+	3.57912	0.652669	+	3.5115	-0.216344
ADSL	Adenylosuccinate lyase		9	38.8	0	60.521	5051200000	0.207518	0.255682	0.488412	0.391438	0.0511633	0.290778	0.354903	0.750692	0.580917	0.331361	NaN	NaN	0.241596	0.374177	0.492827	-0.242789	0.462367	0.68921	-0.240435	-0.159299	-0.239924	0.0117819	-0.131724	-0.309771		0.202046	-0.0727443		0	-0.0235422		0.106591	-0.0666044		0.290223	-0.0981629	+	1.75979	0.446351		0.175496	-0.0523294
SRI	Sorcin		9	72.7	0	18.368	1925400000	-0.152548	-0.146004	-0.181738	0.138028	0.0180643	-0.361546	-0.45111	-0.199355	-0.119918	-0.148641	-0.434266	-0.385695	-0.217256	-0.334243	-0.226392	-0.243011	-0.230398	0.0843364	0.290071	0.228973	0.315566	0.378179	0.173255	-0.200515		0.235533	0.0916124		0.12234	-0.0660734		0.499061	0.129606		0.43889	-0.219969	+	3.32902	-0.46767		1.19144	0.0992001
SLC7A1	High affinity cationic amino acid transporter 1		8	14.6	0	33.615	7856900000	0.732399	0.77947	0.991535	0.956354	0.853676	0.965692	0.0582473	0.0287106	-0.17524	-0.193668	0.221568	-0.0417289	0.0563061	0.0713507	0.123799	-0.012068	0.163628	0.155879	0.66339	0.632734	0.703632	1.15763	0.810237	0.78073		0.471645	0.0907725		0.0579337	0.0248179		0.137305	0.018661		0.188526	-0.0798781		0.00562909	0.00313765	+	3.09635	0.75065
ALDH1B1	Aldehyde dehydrogenase X, mitochondrial		6	21.5	0	17.646	3144400000	0.0392789	NaN	0.068602	0.264356	0.167872	0.1137	-0.710921	-0.598544	-0.268886	-1.35528	-1.74855	-1.08238	-0.704089	-0.820183	-0.92366	-0.599025	-0.842491	-0.710189	-0.0908797	-0.33328	-0.0811406	-0.320342	-0.499198	-0.0794475		0.427003	0.135088	+	1.55277	-0.869285		0.546207	0.0987425		0.0314022	0.0217457	+	1.17169	0.298861	+	2.73794	0.869918
ALDH3A1	Aldehyde dehydrogenase, dimeric NADP-preferring		12	37.7	0	55.084	8993600000	1.62817	0.611645	2.0091	1.33857	1.86817	2.29552	1.48615	0.699996	0.945083	0.738638	1.71114	1.83637	1.42766	1.57376	1.17146	0.731357	1.56604	1.39523	-0.662346	-0.642955	-0.618495	-0.699138	-0.558368	-0.703572		0.344694	0.417783		0.246127	0.384974		0.20698	-0.160088		0.174535	0.0121008	+	2.11146	2.06983		0.0194637	0.025341
SDHA	Succinate dehydrogenase [ubiquinone] flavoprotein subunit, mitochondrial		20	44.9	0	89.921	9559100000	-0.471029	-0.391418	-0.312706	-0.364292	-0.189088	-0.337011	-0.29267	-0.477984	-0.443575	-0.702938	-0.454427	-0.328997	-0.386921	-0.299809	-0.148241	-0.302457	-0.393349	-0.409719	0.237564	0.360758	0.352193	0.215616	0.240742	0.0927488		0.54466	0.0949207		0.199476	-0.0907106		0.335493	-0.090185		2.97967	-0.119171	+	3.36337	-0.70124		0.610079	-0.113394
GDI1	Rab GDP dissociation inhibitor alpha		4	32.9	0	11.82	610580000	NaN	NaN	NaN	NaN	NaN	NaN	NaN	NaN	NaN	NaN	NaN	NaN	-0.598719	NaN	NaN	NaN	NaN	NaN	-0.142847	-0.040764	NaN	-0.39935	0.123534	NaN		-4.34e-08	0		-4.34e-08	0		0	NaN		0	-0.102083		0	NaN		0	NaN
MAT2A	S-adenosylmethionine synthase isoform type-2		8	23.8	0	31.836	4608800000	0.0539454	0.281431	0.466966	0.370276	0.506805	0.624241	-0.183048	0.0464211	-0.216066	0.010923	0.129877	-0.231481	-0.219404	-0.336792	-0.327077	-0.122491	-0.164383	-0.0979342	-0.014689	-0.0784875	-0.0662612	-0.0606832	0.136979	0.188907		1.43239	0.232993		0.544359	0.087337		1.30768	0.166155		1.04098	0.17221	+	1.31587	0.335925	+	1.96141	0.561872
CPS1	Carbamoyl-phosphate synthase [ammonia], mitochondrial		66	55.4	0	323.31	87567000000	-0.212484	-0.310987	-0.200565	-0.291415	-0.244155	-0.255925	-0.847674	-0.809802	-0.811017	-0.873186	-0.866358	-0.837429	-0.795333	-0.844613	-0.763685	-0.817918	-0.825747	-0.692129	-0.00298949	0.0144981	0.0207689	0.0326651	0.013498	0.00288247		0.175232	-0.0224867		1.14757	-0.0361599		0.306461	0.0226128		0.967355	-0.0181804	+	2.76282	-0.263989	+	3.7302	0.559865
DNAJA1	DnaJ homolog subfamily A member 1		10	33.8	0	32.574	3591600000	-0.257356	0.0732718	-0.0263961	-0.46957	-0.0856804	-0.129118	-0.168512	-0.13005	-0.373645	-0.251796	-0.327728	-0.328906	0.31823	-0.10462	0.227618	0.155879	-0.186935	0.207518	-0.194394	-0.138426	-0.0104104	-0.192909	-0.216334	-0.280755		1.4226	-0.157963		0.422979	-0.0787415		0.781751	-0.0882554		0.90308	-0.116579		0.145308	0.043755		0.602058	-0.217236
UQCRC1	Cytochrome b-c1 complex subunit 1, mitochondrial		10	33.3	0	88.35	8705900000	-0.366039	-0.349144	-0.378344	-0.466158	-0.44334	-0.155421	-0.546414	-0.836913	-0.622487	-0.950732	-0.688915	-0.554718	-0.867042	-0.800551	-0.779299	-0.732692	-0.866752	-0.80912	-0.208561	-0.277621	-0.278951	-0.223829	-0.114473	-0.0630926		0.0282902	0.00953581		0.124801	-0.0628502		0.0679822	0.0127757		1.28396	0.131425		2.18907	-0.104375	+	4.07685	0.451121
HIBADH	3-hydroxyisobutyrate dehydrogenase, mitochondrial		3	11	0	10.501	529680000	0.239642	-0.128046	0.443501	NaN	NaN	-0.0672736	NaN	-0.112381	0.102188	NaN	NaN	NaN	NaN	-0.0651891	-0.24501	NaN	NaN	NaN	0.861638	0.664938	0.759412	NaN	0.394295	0.825704		0	-0.510774		0	NaN		0	NaN		0.0890631	-0.0842085	+	1.02211	-0.527142		0.639249	0.340132
ATIC	Bifunctional purine biosynthesis protein PURH;Phosphoribosylaminoimidazolecarboxamide formyltransferase;IMP cyclohydrolase		32	67.6	0	214.51	27546000000	-0.186574	-0.189713	-0.158301	-0.109546	-0.141526	-0.104108	-0.228672	0.0193461	-0.139411	-0.0529698	-0.0284105	-0.186098	-0.11951	-0.262867	-0.237898	-0.240401	-0.153992	-0.0509358	0.153676	0.122606	0.10916	0.0850168	0.101381	0.122209		1.6797	0.0598028		0.124701	0.0270862		0.227347	0.0583154		0.539782	0.0201608	+	4.35411	-0.28379		0.249625	0.0285626
YWHAB	14-3-3 protein beta/alpha;14-3-3 protein beta/alpha, N-terminally processed		6	53.3	0	166.84	37750000000	0.323774	0.274411	0.305212	0.262072	0.333767	0.235482	0.220454	0.194213	0.246469	0.231801	0.255924	0.246347	0.150949	0.130931	0.202136	0.229219	0.0596321	0.157044	-0.15125	-0.271217	-0.259616	-0.301284	-0.354317	-0.248519		0.205411	-0.0240249		0.482965	0.0243121		0.0921896	-0.0127072		0.141839	0.0260106	+	5.15829	0.578505		2.26058	0.139793
SFN	14-3-3 protein sigma		10	54.4	0	61.034	16005000000	0.366924	0.506703	0.182311	0.393636	0.481092	0.452701	0.393965	0.0791561	0.359971	0.183709	0.153676	0.259182	0.317072	0.14104	0.204892	0.455334	0.0230425	-0.373832	-0.22484	-0.404764	-0.321315	-0.0949264	-0.337959	-0.453656		0.370944	0.090497		0.354452	-0.0788419		0.329322	-0.186154		0.143232	-0.0651498	+	2.04526	0.625648		0.539846	0.130978
STIP1	Stress-induced-phosphoprotein 1		31	51.6	0	154.08	31681000000	0.215368	0.212258	0.187768	0.0968015	0.19774	0.0411028	0.299362	0.1121	0.24184	0.057277	0.178364	0.214871	0.152508	0.0657101	0.154583	0.214871	-0.00436351	0.291721	-0.673325	-0.398684	-0.472629	-0.465122	-0.470429	-0.460151		0.835265	-0.0932499		0.270678	-0.0675966		0.259432	0.0431424		0.35869	-0.0891567	+	4.88308	0.65061		1.24258	0.0808641
S100A11	Protein S100-A11;Protein S100-A11, N-terminally processed		5	49.5	0	32.027	18804000000	0.245252	0.272859	0.258459	0.121811	0.186501	0.249991	0.323889	0.131589	0.173511	0.273456	0.349025	0.229834	0.124461	0.028852	0.0450235	0.127501	0.147046	0.105276	0.0321009	-0.0983974	-0.124361	-0.30479	-0.0955891	-0.0237243		0.782951	-0.0727557		0.356645	0.074442		0.676973	0.0604957		0.737279	0.146779	+	2.57536	0.434706		2.48845	0.192745
L1CAM	Neural cell adhesion molecule L1		20	20	0	75.825	11788000000	0.689031	0.719665	0.871844	0.989212	0.916324	1.0082	0.300182	0.302641	0.294312	0.202261	0.386038	0.56003	1.78869	2.07286	2.15053	2.23205	2.2047	1.34613	1.2419	1.18986	1.11263	1.19554	1.13514	1.17018		1.32128	0.211065		0.293509	0.0837315		0.0668184	-0.0763961		0.265432	0.0163991	+	2.53659	-0.405829	+	3.26014	-1.24384
PRDX2	Peroxiredoxin-2		11	70.2	0	44.467	19924000000	-0.295323	-0.421148	-0.425056	-0.316636	-0.412654	-0.548987	-0.595358	-0.663351	-0.559622	-0.62756	-0.557221	-0.44723	-0.6171	-0.60073	-0.643586	-0.671462	-0.646361	-0.621932	-0.124535	-0.0471744	-0.0840891	-0.0893901	-0.154169	-0.165095		0.427623	-0.0455834		0.49657	0.0621068		0.408404	-0.0261128		3.05734	-0.0743814	+	2.63056	-0.306958	+	2.24605	0.239963
PYCR1	Pyrroline-5-carboxylate reductase 1, mitochondrial;Pyrroline-5-carboxylate reductase		3	18.7	0	9.5564	2521000000	-1.94009	-1.81731	-1.55453	NaN	-2.06903	-1.78642	-2.10787	NaN	NaN	NaN	NaN	NaN	NaN	NaN	NaN	NaN	NaN	NaN	-1.1327	-1.44501	NaN	NaN	-1.06607	-1.89932		1.58364	-0.241808		0	NaN		-4.34e-08	0		0	0.312304		0	-0.325634		0	NaN
GBP2	Interferon-induced guanylate-binding protein 2		18	34.7	0	73.269	12621000000	3.49147	3.75082	1.05776	1.46258	3.31161	3.48749	1.87629	2.81607	1.73942	3.90574	2.73543	2.89714	3.01228	0.728574	2.58058	1.61885	2.73214	3.72093	-0.987589	-1.25439	-1.13464	-1.13959	-0.997406	-1.38636		0.00302212	-0.0127947		0.632996	1.03551		0.204245	0.583496		0.115616	0.0524214	+	1.99607	3.94289		0.233941	0.659538
RPL9	60S ribosomal protein L9		8	53.6	0	138.63	17898000000	0.0625362	0.198997	0.0889556	0.212383	0.111565	0.111966	0.152378	0.192699	0.1137	0.021764	0.0963968	0.124857	-0.00640533	-0.266403	0.0447438	-0.0862929	-0.0375768	0.0923428	-0.14073	-0.0470105	-0.234754	-0.138156	-0.112693	-0.184031		0.143766	0.0284752		0.630446	-0.0719199		0.267121	0.0655124		0.0282797	-0.00584473	+	1.70094	0.256803		0.853432	0.192851
KIF5B	Kinesin-1 heavy chain		19	26.6	0	70.692	2626400000	0.340619	0.843984	NaN	NaN	NaN	0.7589	0.7376	0.274888	NaN	NaN	0.428678	NaN	NaN	NaN	NaN	NaN	NaN	NaN	-1.11719	-0.815072	-0.765131	-0.734035	-1.31592	-0.914711		0	NaN		0	0.153791		-4.34e-08	0		1.06	-0.344528	+	2.25365	1.36371		0	NaN
DUT	Deoxyuridine 5-triphosphate nucleotidohydrolase, mitochondrial		8	61.6	0	68.698	10645000000	-0.135729	-0.0893287	0.00920381	-0.174947	0.21014	0.125519	0.504976	-0.041922	-0.121251	-0.00468191	0.0724488	0.0060466	-0.162832	0.0850168	0.0103502	-0.0541676	-0.155646	-0.112256	0.433707	0.27858	0.461738	0.402176	1.14887	0.581303		0.48379	0.125522		0.147394	-0.0893299		0.305316	-0.0848685		0.724259	0.340462	+	2.55877	-0.452783		0.227982	-0.0494629
ABCD1	ATP-binding cassette sub-family D member 1		20	36.8	0	100.23	11207000000	2.78812	1.78576	2.78762	1.8375	2.15998	1.62877	2.61374	3.37657	1.67156	2.45407	1.94103	1.33039	0.60862	2.28709	2.50192	1.58352	0.739848	2.20717	-1.15656	-1.56001	-1.68325	-1.37636	-1.18387	-1.32793		0.454066	-0.578415		0.6078	-0.645463		0.13683	-0.28903		0.832845	0.317085	+	3.49379	3.99371		0.404914	0.654624
KDELR2	ER lumen protein-retaining receptor 2		3	25.9	0	42.379	6322900000	3.15624	NaN	NaN	0.876959	NaN	NaN	NaN	NaN	1.80335	NaN	NaN	NaN	0.346191	NaN	NaN	0.596172	NaN	0.760434	-1.39962	-1.2731	-1.27925	-1.39897	NaN	-1.41515		0	-2.27928		0	NaN		0	0.249981		0.377781	-0.0713505		0	4.47334		0	2.81004
MCM4	DNA replication licensing factor MCM4		7	8.9	0	21.147	2101500000	0.0361869	-0.120012	0.230572	-0.178747	0.170182	0.196103	NaN	0.177727	0.284159	NaN	NaN	NaN	0.225275	NaN	-0.029809	0.596554	NaN	0.445833	0.10809	-0.186131	0.0953169	0.188654	-0.220429	-0.0606079		0.0291514	0.013597		0	NaN		1.1076	0.42346		0.163479	-0.0902627		0.0364372	0.0163021		0.106482	-0.0488174
MCM5	DNA replication licensing factor MCM5;DNA helicase		12	24.7	0	26.683	2801100000	-0.41227	-0.211648	0.262072	-0.0177091	0.0926134	0.017922	0.279412	0.344147	-0.0610142	-0.154378	NaN	NaN	NaN	0.0468402	-0.0979032	0.245496	NaN	0.739589	0.073546	0.0500489	0.0284276	0.072586	0.104873	0.182692		0.278277	0.151558		0	-0.433789		0	0.837492		0.963133	0.0700164		0.355076	-0.17097		0.129432	-0.0950839
MCM7	DNA replication licensing factor MCM7		15	28.7	0	64.325	6462300000	0.129349	0.0274371	0.443925	0.147307	0.194591	0.354226	0.0877344	0.0743684	0.172487	0.143263	0.212756	0.0714881	0.0103502	0.375067	0.77104	0.087327	0.319271	0.37529	-0.102388	-0.188167	0.0777899	-0.250732	0.0458623	0.00690831		0.14819	0.0318046		0.153581	0.0309722		0.329136	-0.124857		0.465662	0.103831		0.932084	0.320607		0.297159	-0.185249
SHMT1	Serine hydroxymethyltransferase, cytosolic		7	24.3	0	27.805	1081600000	NaN	NaN	0.479955	NaN	NaN	0.62798	0.178619	NaN	NaN	0.277033	NaN	NaN	NaN	NaN	NaN	NaN	NaN	NaN	-1.39354	-0.0490539	-0.677264	-0.8863	-0.731566	-0.158671		0	0.148025		0	0.0984134		-4.34e-08	0		0.12686	-0.223719		0	1.01749		0	NaN
SHMT2	Serine hydroxymethyltransferase, mitochondrial;Serine hydroxymethyltransferase		22	61.5	0	120.57	23779000000	0.164271	0.186627	0.182565	0.0792927	0.00532815	0.10165	-0.253601	-0.183327	-0.250165	-0.332062	-0.260342	-0.27127	-0.258701	-0.296173	-0.255374	-0.232396	-0.294226	-0.195632	0.468427	0.504163	0.558072	0.445515	0.550408	0.516822		1.14386	-0.115731		1.04896	-0.0588603		0.65352	0.0293313		0.0974995	0.00930259	+	3.21215	-0.324762	+	5.15134	0.447904
HSPA4	Heat shock 70 kDa protein 4		38	64.2	0	275.72	41978000000	-0.136728	-0.105597	-0.160605	-0.267184	-0.219891	-0.0794475	-0.133527	-0.239873	-0.295181	-0.146867	-0.270312	-0.0512646	-0.246567	-0.140794	-0.0355644	-0.241765	-0.173726	-0.229095	-0.180986	-0.106902	-0.10386	-0.148529	-0.0846551	-0.109888		0.295197	-0.054531		0.275223	0.0667125		0.458053	-0.0738871		0.050294	-0.00541279		0.271356	-0.0145464		0.0358408	0.00666503
GPC1	Glypican-1;Secreted glypican-1		6	14.7	0	22.482	764990000	-0.884194	NaN	0.671293	NaN	0.358171	0.984261	-0.295819	-0.00440699	NaN	-0.407574	-0.349621	0.155231	1.65067	NaN	NaN	NaN	NaN	NaN	NaN	NaN	NaN	NaN	2.67728	1.84988		0	0.312968		0.521886	-0.228485		0	NaN		0	NaN		0	NaN		0	-1.75712
CTNNA1	Catenin alpha-1		22	40.5	0	156.41	14981000000	0.0949116	0.250962	0.305912	0.303927	0.310689	0.250113	0.268913	0.272262	0.332966	0.297602	0.426318	0.255682	0.516721	0.613249	0.53067	0.439357	0.570366	0.453649	0.268794	0.258338	0.316725	0.294665	0.133695	0.265677		0.344672	0.0709811		0.186071	0.0351538		1.53843	-0.0657559		0.428273	-0.0671874		0.482481	-0.0726475	+	2.06416	-0.336285
PHB	Prohibitin		15	60.3	0	71.238	10479000000	-0.313907	-0.137949	-0.11774	-0.301639	-0.0683774	0.0668125	-0.19159	0.000721115	-0.389224	0.0870554	-0.143373	-0.203302	-0.390377	-0.313979	-0.431384	-0.172864	-0.362028	-0.256614	-0.0243111	-0.196409	-0.164901	-0.13367	-0.108519	-0.0822093		0.65424	0.0887977		0.307504	0.106824		0.525697	0.114745		0.849171	0.0933135		0.142107	-0.0248726		1.24512	0.188714
SERPINB6	Serpin B6		1	45.5	0	64.196	5717900000	0.0263043	-0.29078	-0.158494	0.0746424	-0.151506	-0.0313268	-0.220278	0.202888	0.0610158	-0.349787	-0.237881	-0.0782134	0.0254541	-0.0593296	0.0060466	0.0159258	0.0794293	-0.0617971	-0.128488	-0.036304	0.237931	0.0850168	0.13711	-0.0546021		1.17692	0.104926		0.833689	-0.236502		0.11296	0.0204623		1.77284	-0.110874		0.909063	-0.236538		0.620206	-0.131714
RDX	Radixin		7	36.4	0	17.925	6649700000	-0.0395328	-0.0969926	-0.122397	-0.233515	-0.514944	0.34551	-0.0596152	NaN	-0.783589	NaN	0.250234	NaN	-0.0692249	-0.338597	-0.244429	-0.370807	0.323658	-0.365927	-0.485681	-0.27432	-0.835214	-0.556988	-0.552706	-0.46907		0.0587991	-0.048009		0	NaN		0.0900006	0.079725		0.126427	0.0530212	+	1.34015	0.4692		0.726247	0.131109
RFC2	Replication factor C subunit 2		4	16.4	0	26.134	951400000	NaN	0.228603	-0.0688768	0.183582	0.643764	0.360645	NaN	0.357721	NaN	NaN	NaN	0.0694272	0.188907	NaN	NaN	NaN	NaN	NaN	0.274769	0.356932	0.327687	0.339137	0.240253	0.66712		1.96566	0.422341		0	NaN		0	NaN		0.131847	0.0527949		0.997196	-0.261389		0	-0.109044
RPL22	60S ribosomal protein L22		4	43.8	0	76.644	10271000000	-0.0838597	-0.224452	0.0594937	-0.088224	-0.106607	-0.203136	0.116764	0.50457	0.0698396	0.222063	0.106616	0.0985544	-0.0301772	0.253626	-0.140523	-0.0634694	0.0443242	-0.0251917	0.181929	0.0862402	0.0939657	0.16954	0.255682	0.244522		0.154351	-0.0497164		0.200168	-0.08798		0.157715	-0.0424209		1.28858	0.110796		1.08862	-0.199521		0.316031	-0.110581
SPR	Sepiapterin reductase		3	18.8	0	35.504	3146700000	NaN	0.460061	NaN	NaN	0.256407	0.536351	NaN	0.118891	NaN	-0.00753606	0.131589	-0.0311056	0.0831111	-0.0039005	0.09815	0.226385	NaN	NaN	-1.02965	-1.07357	-0.942224	-1.1862	-1.04731	-1.21133		0	-0.203654		0	0.0126983		0	0.143274		0.241949	-0.0287637		0	1.52739		0	0.400941
MYH9	Myosin-9		55	42.9	0	323.31	47180000000	0.287591	0.235972	0.245861	0.200128	0.111833	0.407081	0.348006	0.278461	0.378734	0.28629	0.241474	0.136585	0.358171	0.310805	0.341417	0.32458	0.263876	0.0357646	-0.0841656	0.22132	-0.0145433	-0.0608788	-0.172279	0.0984196		0.0611487	-0.0167941		0.655653	-0.113617		0.547878	-0.128724		0.270093	-0.101308		1.10064	0.207842		1.72577	-0.0803233
COPB2	Coatomer subunit beta		6	9.8	0	14.447	686490000	-0.311882	NaN	NaN	-0.399274	0.0387171	-0.0797372	0.202386	NaN	NaN	NaN	NaN	NaN	NaN	NaN	-0.224739	NaN	NaN	NaN	-0.541597	-0.85048	-0.213504	0.303225	-0.578047	NaN		0	-0.0873912		0	NaN		0	NaN		0.0234199	-0.0278297		0	-0.058296		0	-0.0871437
SOAT1	Sterol O-acyltransferase 1		10	22.7	0	43.106	5538900000	1.80983	1.65301	NaN	1.74097	NaN	NaN	1.42916	1.27965	1.38709	1.58895	NaN	NaN	NaN	1.70115	NaN	NaN	NaN	1.17153	-1.36134	-1.37857	-1.40955	-1.39214	-1.12199	-1.59148		0	-0.0688553		0	0.159788		0	NaN		0.0828977	0.0351459	+	4.81638	3.12484		0	0.0302703
BSG	Basigin		3	48.3	0	72.794	16310000000	2.73403	2.05766	2.10949	1.99726	2.31107	2.4926	1.70328	1.77972	1.31939	1.6792	1.61264	1.41376	0.48388	0.481196	0.597698	0.958212	1.09011	0.753005	1.61607	1.72626	1.73777	1.67893	1.64759	1.56467		0.0299649	-0.0334198		0.148107	-0.0322653		1.03732	0.412851		2.30145	-0.104876	+	1.2612	0.586071	+	2.89109	1.77947
DEK	Protein DEK		8	23.7	0	14.873	1315300000	0.727877	NaN	0.135272	0.244156	NaN	NaN	NaN	NaN	0.23952	0.974603	NaN	NaN	-0.543278	0.240742	-0.0807133	0.016639	NaN	0.0504668	0.612022	0.702658	0.166587	0.620117	NaN	0.814837		0	-0.483721		0	NaN		0.45162	0.345549		0.109391	0.0520424		0.072212	-0.0648793		0.647058	0.559324
PPM1A	Protein phosphatase 1A	+	4	19.9	0	19.37	1133200000	-0.794608	-1.01459	-0.767167	-0.0255735	-0.175175	-0.0707847	-0.498505	-0.392516	-0.0368662	-0.385055	-0.247988	NaN	0.393197	NaN	0.549127	0.702125	NaN	NaN	NaN	-0.00384265	-0.0351209	NaN	0.374177	NaN	+	2.54121	0.768276		1.11734	0.128989		0	0.308929		0	0.409298	+	2.42812	-0.839306	+	2.83983	-1.32995
HMGCL	Hydroxymethylglutaryl-CoA lyase, mitochondrial		8	27.4	0	8.2559	250630000	NaN	NaN	NaN	NaN	NaN	NaN	NaN	-1.25718	-1.15274	-1.39183	NaN	-1.57227	NaN	-1.36331	NaN	-1.52388	NaN	NaN	NaN	NaN	NaN	NaN	NaN	NaN		-4.34e-08	0		0	-0.419525		0	NaN		-4.34e-08	0		-4.34e-08	0		0	NaN
PSMC2	26S protease regulatory subunit 7		20	52.7	0	91.271	13465000000	-0.820591	-0.785477	-0.685037	0.270589	0.205643	0.280956	-0.392118	-0.598785	-0.51093	0.206393	0.0821575	0.188148	0.0170666	0.148218	0.117296	0.40021	0.861003	0.328951	0.285698	-0.0134798	-0.0358602	-0.19957	0.424062	0.421802	+	2.84986	1.0161	+	2.65868	0.65951		1.01117	0.435861		1.41442	0.460158	+	3.1714	-0.680732	+	3.95334	-0.857895
TRIM23;ARL4A	E3 ubiquitin-protein ligase TRIM23;ADP-ribosylation factor-like protein 4A		1	2.9	0	4.1091	2858500000	-0.735716	-0.563326	-0.499749	NaN	NaN	NaN	-0.47301	NaN	-0.40379	0.329526	NaN	NaN	NaN	NaN	0.0920721	NaN	NaN	NaN	0.697507	NaN	0.0364681	-0.0324477	0.702303	0.365469		0	NaN		0	0.802535		0	NaN		0.803897	0.531876	+	2.10471	-0.601607		0	-0.691669
ATP5C1	ATP synthase subunit gamma, mitochondrial		8	26.8	0	23.212	3554600000	0.024887	-0.164626	-0.109717	0.15056	0.198243	0.185867	-0.256787	-0.241356	-0.290445	-0.520625	-0.459477	-0.852641	-0.391172	-0.306841	-0.242294	-0.350743	-0.287413	-0.380371	-0.0719367	-0.0818886	-0.022874	0.00690831	-0.379282	-0.222616		1.1818	0.261375		1.07505	-0.348052		0.161823	-0.0260735		0.66601	-0.191994		0.336189	-0.0505337		1.50253	0.230284
RPL4	60S ribosomal protein L4		29	56.2	0	174.73	106430000000	-0.126911	-0.1446	-0.162912	-0.193222	-0.195847	-0.231464	-0.0963909	-0.122444	-0.110822	-0.103286	-0.150865	-0.12863	-0.230668	-0.174849	-0.231938	-0.254892	-0.20533	-0.192101	0.211386	0.117828	0.213129	0.251325	0.182565	0.246226		2.12011	-0.0620366		0.981948	-0.017708		0.0726778	-0.00495573		0.179897	0.019298	+	2.9309	-0.338902		1.46105	0.0676774
NUDT1	7,8-dihydro-8-oxoguanine triphosphatase		4	35.9	0	12.734	753520000	NaN	NaN	NaN	NaN	NaN	NaN	NaN	NaN	NaN	NaN	NaN	NaN	NaN	NaN	NaN	NaN	NaN	NaN	NaN	-1.27428	NaN	-0.925412	-1.20906	-1.11101		-4.34e-08	0		-4.34e-08	0		-4.34e-08	0		0	-0.185597		0	NaN		-4.34e-08	0
PGM1	Phosphoglucomutase-1		15	35.4	0	23.478	3229900000	-0.0829121	-0.331881	0.17479	-0.285759	0.00475299	-0.0415805	-0.197732	-0.447033	-0.316097	-0.131756	-0.0857569	0.143524	-0.0334071	-0.210012	-0.0283958	0.0299829	-0.158172	-0.244702	0.325271	0.264957	0.459117	0.260989	0.425245	0.0641931		0.0487955	-0.0275278		0.887166	0.295624		0.126279	-0.0336921		0.276951	-0.0567846	+	1.19795	-0.408355		0.0224091	0.0106039
SERPINB5	Serpin B5		11	37.9	0	76.325	5910400000	-0.44973	-0.54981	-0.614337	-0.387242	-0.399331	-0.443713	-0.575637	-0.542626	-0.303757	-0.200913	-0.462217	-0.511259	-0.621044	-0.579814	-0.604082	-0.328073	-0.600096	-0.690288	-0.0538381	-0.154988	-0.259789	-0.0859254	-0.0241498	0.0852886		1.21261	0.127864		0.172661	0.0825439		0.188275	0.0621611		1.31175	0.169334	+	2.2242	-0.371058		0.574342	0.0636878
SRP14	Signal recognition particle 14 kDa protein		5	54.4	0	44.868	4108100000	NaN	0.260146	NaN	NaN	0.284514	NaN	-0.19861	1.39512	0.739243	0.632268	-0.110012	0.399554	0.674822	NaN	NaN	-0.297644	0.982291	0.647453	0.905736	NaN	0.726744	0.471344	0.583423	1.14841		0	0.024368		0.176553	-0.337981		0	-0.972466		0.198735	0.266874		0	-0.338898		0	-0.414676
HPCAL1;HPCA	Hippocalcin-like protein 1;Neuron-specific calcium-binding protein hippocalcin	+	7	75.1	0	87.855	36233000000	-1.30433	-1.33352	-1.31588	1.89243	1.82957	2.03949	-0.739999	-0.906088	-0.780389	2.02949	2.01814	1.98269	0.730227	0.76562	0.799916	2.69597	2.89346	2.88429	1.95107	0.0859685	0.0858326	0.0468402	2.07073	2.03966	+	3.47497	3.2384	+	3.45712	2.81893	+	3.25739	2.05932	+	3.34701	1.94761	+	7.02923	-1.39079	+	7.14043	-2.08316
FDFT1	Squalene synthase		26	63.1	0	268.2	126520000000	4.56322	3.97737	4.58129	4.81742	3.91275	4.38128	3.81997	4.31332	4.09635	4.20625	3.74039	3.10445	3.789	3.49838	4.00881	3.49352	4.14045	4.24321	-1.55156	-1.33243	-1.36643	-1.38583	-1.5396	-1.59331		0.00800477	-0.00347789		0.359397	-0.392848		0.260002	0.193665		2.32537	-0.199932	+	5.06441	5.73552	+	1.15682	0.608565
TAGLN2	Transgelin-2		15	89.9	0	239.75	68757000000	-0.648552	-0.669006	-0.752972	-0.746834	-0.712079	-0.716955	-0.330828	-0.307591	-0.252518	-0.19309	-0.286814	-0.276712	-0.283896	-0.313872	-0.243865	-0.30627	-0.246755	-0.290921	-0.27364	-0.294119	-0.21058	-0.202356	-0.240401	-0.232057		0.334704	-0.0351125		0.345354	0.0447732		0.00688211	-0.000771249		0.285319	-0.0130142	+	3.32956	-0.454492	+	3.38392	-0.409633
TALDO1	Transaldolase		13	43	0	28.837	8006400000	-0.0152721	-0.173645	0.0361869	0.0416635	-0.0469657	-0.0271015	-0.146356	-0.200067	0.100305	-0.100654	0.0650208	0.0610158	-0.0702242	-0.159525	-0.122837	-0.0210429	-0.300075	-0.058488	0.456911	0.413486	0.297485	0.327112	0.442864	0.521252		0.263737	0.0401087		0.373251	0.0905001		0.0439132	-0.00900683		0.988459	0.127648	+	2.27511	-0.396938		0.415337	0.0666186
ETFB	Electron transfer flavoprotein subunit beta		6	25.5	0	13.401	1377200000	-0.120451	-0.644127	-0.324455	-0.26668	-0.203319	-0.265501	-0.305806	-0.658265	-0.580591	-0.290515	-0.217139	NaN	-0.790659	-0.634867	-0.493398	-0.374486	-0.483521	-0.197517	0.477677	0.184471	0.363451	0.340505	0.156267	0.199751		0.248715	0.117844		0.320625	0.228209		1.19358	0.2878		0.0371306	-0.018244	+	1.81317	-0.659153		0.723738	0.276631
ATP6V1A	V-type proton ATPase catalytic subunit A		13	31.2	0	61.698	5884000000	-0.233922	0.00690831	-0.0686346	-0.126218	0.00115371	-0.122633	-0.171108	0.0153548	0.346418	-0.035594	-0.162137	0.160275	0.0318186	0.106348	0.0635029	0.0473989	0.203013	0.259423	-0.647761	-0.611777	-0.651745	-0.883209	-0.633569	-0.584047		0.113239	0.0159838		0.262041	-0.0760403		0.726599	0.102722		0.335471	0.0937851	+	2.29688	0.617028		1.0479	-0.165773
HSPA9	Stress-70 protein, mitochondrial		31	47.9	0	306.65	82829000000	-0.248074	-0.280562	-0.240827	-0.223222	-0.249891	-0.221842	-0.196988	-0.141128	-0.212818	-0.240452	-0.224857	-0.202921	-0.1794	-0.202107	-0.235858	-0.174182	-0.166826	-0.157689	0.226015	0.1995	0.277509	0.211012	0.213005	0.254957		1.74581	0.024836		0.54353	-0.0390985		0.693361	0.039556		0.0185073	0.00198549	+	4.23791	-0.485828		1.16566	-0.0506993
EIF4A3	Eukaryotic initiation factor 4A-III;Eukaryotic initiation factor 4A-III, N-terminally processed		12	43.1	0	31.586	2514500000	0.691445	0.115033	0.560324	0.121281	0.450063	0.0419438	0.0578315	0.0833836	NaN	0.235114	0.294665	0.16092	0.23952	-0.0288667	NaN	-0.093525	0.136191	NaN	-0.371534	-0.335462	-0.446954	-0.538388	-0.355867	-0.214926		0.31672	-0.251171		1.25523	0.194282		0.100769	-0.0839936		0.451664	0.126159	+	2.08442	0.895869		0.601541	0.350274
RPS19	40S ribosomal protein S19		4	24.1	0	8.0673	505500000	-1.25998	-0.818783	-0.708514	-0.625511	-0.470049	-0.675374	NaN	NaN	NaN	NaN	NaN	NaN	NaN	NaN	-0.781008	NaN	NaN	NaN	NaN	NaN	NaN	NaN	NaN	-1.41277		0.72042	0.338781		-4.34e-08	0		0	NaN		0	NaN		0	NaN		0	-0.148084
RPL3	60S ribosomal protein L3		20	49.9	0	116.59	42133000000	0.0302654	0.0199154	0.0143553	-0.0746537	-0.136252	-0.0490837	0.303342	0.24817	0.366028	0.265917	0.127633	0.184471	0.0747794	0.189414	0.113834	0.0958569	0.0728604	0.101247	0.298893	0.310107	0.334568	0.434668	0.35061	0.348799		1.24935	-0.108175		0.945026	-0.113173		0.322211	-0.0360209		0.329072	-0.0270139	+	3.03853	-0.338269		1.43103	-0.104497
ANP32A	Acidic leucine-rich nuclear phosphoprotein 32 family member A		7	32.5	0	87.622	9153400000	-0.280931	-0.180103	-0.129702	-0.123827	-0.349364	-0.257062	-0.106886	-0.0794475	-0.0787769	-0.214341	-0.248691	-0.0366295	-0.115629	-0.189697	-0.0947415	-0.17798	-0.134936	-0.0714515	0.278936	0.267715	0.219711	0.227741	0.315914	0.172743		0.158285	-0.0465059		0.469847	-0.0781833		0.0482561	0.00523313		0.137723	0.0174755	+	3.12625	-0.435301		0.528056	-0.0635563
FEN1	Flap endonuclease 1		7	28.4	0	38.791	5147400000	-0.170491	-0.244942	-0.246447	-0.231397	-0.077452	-0.0572265	-0.230296	-0.40878	-0.404535	-0.314966	NaN	-0.517152	-0.293253	-0.306716	-0.296173	-0.0380656	-0.436822	-0.309932	0.153286	0.196355	0.0241777	0.129613	0.134747	0.051024		0.464731	0.0986015		1.04776	-0.0986435		0.110207	0.0371074		0.0199879	-0.00369614	+	2.41607	-0.337342		1.43006	0.0780874
TXLNA	Alpha-taxilin		8	24.5	0	18.791	923590000	0.562963	0.574828	NaN	NaN	NaN	NaN	NaN	NaN	NaN	NaN	NaN	NaN	NaN	NaN	NaN	NaN	NaN	NaN	-1.04466	NaN	-0.93093	-1.14302	1.00497	-0.827692		0	NaN		-4.34e-08	0		-4.34e-08	0		0.400984	1.12561	+	2.36191	1.60587		0	NaN
CCT6A	T-complex protein 1 subunit zeta		18	50.3	0	183.58	38971000000	0.584963	0.53655	0.564524	0.4728	0.497638	0.515813	0.683113	0.687061	0.55159	0.720279	0.539928	0.739589	0.605779	0.494057	0.704252	0.622181	0.716508	0.729531	0.109829	0.169027	0.1145	0.277866	0.0951818	-0.00484117		0.995076	-0.0665954		0.0896263	0.0260108		0.493933	0.0880439		0.553509	-0.120408	+	2.77044	0.374881		0.250234	-0.0393503
NNMT	Nicotinamide N-methyltransferase		13	69.7	0	53.715	3933100000	0.421587	0.620305	0.450591	0.589859	0.597412	1.15847	0.319734	0.273098	0.506805	0.445833	0.513996	0.00733906	0.384492	0.528071	0.742006	0.445939	0.664665	0.717298	-0.115379	-0.0499198	-0.310933	-0.193701	-0.132815	-0.0163661		0.490423	0.284418		0.0627271	-0.0441564		0.467543	0.0577773		0.449318	0.0966647	+	2.65608	0.682346		0.168633	-0.0540288
RPL13A;RPL13a	60S ribosomal protein L13a		19	57.6	0	104.03	103870000000	-0.0888837	-0.16154	-0.225042	-0.13016	-0.201925	-0.225852	0.0578315	0.107822	0.0405417	0.0371714	0.0448837	-0.00623147	-0.0447318	-0.191557	-0.0864308	-0.139601	-0.127431	-0.0678481	0.298893	0.221692	0.241108	0.275484	0.256407	0.32987		0.755628	-0.0274901		1.14396	-0.0434571		0.0271136	-0.0040536		0.944886	0.048962	+	3.17304	-0.404583		0.361243	-0.0509154
ARL1	ADP-ribosylation factor-like protein 1	+	9	69.5	0	114.99	20024000000	-1.13274	-1.03056	-0.999135	1.42046	1.38156	1.32222	-1.19694	-1.17899	-0.976532	1.23395	1.21313	1.35705	1.02984	0.965396	0.809579	2.39366	2.11942	2.1502	2.02368	0.162468	0.42503	0.344488	1.50533	1.72391	+	3.11336	2.42889	+	3.85218	2.38553	+	2.57593	1.28616	+	1.61893	1.44031	+	4.00578	-1.36481	+	4.87886	-1.98908
STAT3	Signal transducer and activator of transcription 3;Signal transducer and activator of transcription		10	20.2	0	25.996	1875200000	0.16221	0.248049	0.439995	0.359184	NaN	0.452174	0.389567	0.446891	NaN	NaN	-0.167977	-0.0146599	0.42707	0.152248	NaN	0.373175	0.534062	0.1133	-0.274599	0.137372	-0.0715576	-0.230753	-0.00445037	-0.785552		0.336591	0.104576		0	-0.614868		0.229684	0.163959		0.598845	-0.299888	+	1.18237	0.338398		0.0137258	-0.00624086
MDH1	Malate dehydrogenase, cytoplasmic;Malate dehydrogenase		7	38.6	0	54.666	13642000000	-0.125557	-0.0127519	-0.0267634	-0.00655027	-0.118257	-0.0576169	-0.217591	-0.0562061	-0.115285	-0.126864	-0.059059	-0.132467	-0.270626	-0.176854	-0.264946	-0.22673	-0.124881	-0.174784	0.0540844	0.214373	0.278461	0.261832	0.271665	0.051024		0.0277219	-0.00578391		0.2532	0.0235641		1.30915	0.0620104		0.75345	-0.125964	+	2.79289	-0.306579		1.75825	0.182451
MDH2	Malate dehydrogenase, mitochondrial;Malate dehydrogenase		16	61.2	0	178.46	47530000000	-0.347417	-0.335535	-0.196723	-0.412021	-0.465301	-0.392024	-0.425501	-0.409681	-0.298832	-0.402607	-0.385394	-0.353358	-0.362362	-0.42492	-0.409144	-0.470849	-0.435495	-0.4237	0.298189	0.242206	0.237686	0.266157	0.227988	0.231678		1.12492	-0.12989		0.0298059	-0.00244818		0.525074	-0.0445394		0.0469932	0.00393518	+	3.41413	-0.541908		0.952274	0.105583
RFC3	Replication factor C subunit 3		4	13.2	0	12.159	874350000	0.568324	0.351402	0.545178	0.248535	NaN	0.300534	0.277033	0.40174	0.237319	NaN	NaN	0.115699	0.474047	NaN	0.0984196	NaN	NaN	NaN	0.400975	0.552082	0.160146	0.562767	0.479127	NaN		1.07438	-0.282217		0	-0.12162		0	NaN		0.106993	0.0839372		0.159089	0.0633029		0.50869	0.202068
HADHA	Trifunctional enzyme subunit alpha, mitochondrial;Long-chain enoyl-CoA hydratase;Long chain 3-hydroxyacyl-CoA dehydrogenase		27	44.7	0	241.38	27261000000	0.38405	0.267476	0.403922	0.431783	0.207393	0.361768	-0.602197	-0.671876	-0.49415	-0.889022	-0.620534	-0.830896	-0.582015	-0.680706	-0.553024	-0.671577	-0.594465	-0.607727	-1.24315	-1.03875	-1.13692	-1.12007	-1.12633	-1.28462		0.193421	-0.0181676		0.588213	-0.190743		0.122988	-0.0193413		0.673321	-0.119451	+	4.99926	1.4504	+	4.11772	0.957064
EIF2S3;EIF2S3L	Eukaryotic translation initiation factor 2 subunit 3;Putative eukaryotic translation initiation factor 2 subunit 3-like protein		17	45.6	0	104.7	9279600000	-0.193668	-0.162557	-0.00775365	-0.0779392	-0.238953	-0.0656722	0.0539454	0.0213375	-0.0200479	-0.0595099	-0.098969	-0.0411351	-0.2881	-0.221623	-0.214609	0.0413831	-0.208794	0.0657101	-0.199023	-0.111602	-0.174572	-0.165823	-0.126313	-0.122083		0.0321732	-0.00619529		0.930413	-0.0849497		0.771118	0.207544		0.0106582	0.00152586		0.184101	0.0293394		0.902743	0.120118
WNT5A	Protein Wnt-5a;Protein Wnt		9	24.7	0	17.913	1023000000	NaN	NaN	NaN	2.8846	NaN	2.60127	NaN	NaN	2.00472	NaN	NaN	1.47519	-1.1881	-1.00541	-1.23162	-1.20576	-0.870572	-1.12051	NaN	2.27522	NaN	2.60907	NaN	2.7643		0	NaN		0	-0.529528		0.602986	0.0760918		0	0.155234		0	NaN		0	NaN
NAA10	N-alpha-acetyltransferase 10		3	23	0	5.5402	973790000	-0.0740917	NaN	NaN	-0.0405711	NaN	NaN	NaN	NaN	NaN	NaN	NaN	NaN	NaN	NaN	NaN	NaN	NaN	NaN	-0.652924	-0.0276456	-0.40316	-0.951317	NaN	-0.563092		0	0.0335206		-4.34e-08	0		-4.34e-08	0		0.0686806	-0.118526		0	0.386616		0	NaN
GARS	Glycine--tRNA ligase		21	37.8	0	115.8	12160000000	0.528871	0.426211	0.444349	0.122606	0.35321	0.239276	0.0291349	0.117163	0.297368	-0.0896357	0.0163537	0.0648829	-0.171563	0.0600474	-0.00946622	-0.104806	0.0681893	-0.0891138	0.13606	0.15082	0.0946415	0.164529	0.170822	0.117429		0.845362	-0.228113		1.17153	-0.150688		0.0115744	-0.0015828		0.041479	0.00477383	+	3.00537	0.329814	+	2.58984	0.506805
TMPO	Lamina-associated polypeptide 2, isoform alpha;Thymopoietin;Thymopentin		4	20.3	0	32.089	2474100000	0.909735	NaN	0.916935	0.397365	0.592541	0.543001	0.511063	0.720804	1.07224	0.310805	1.58674	0.406319	-0.207861	-0.0553215	0.345964	0.300885	0.261591	0.94703	-0.503896	-0.156306	-0.218817	-0.159589	-0.579124	-0.305004		1.00595	-0.443152		5.53e-05	-8.16e-05		1.52873	0.475575		1.25968	-0.284437	+	4.50879	1.09157	+	1.59577	0.885741
SKIV2L2	Superkiller viralicidic activity 2-like 2		4	6.1	0	9.3918	713290000	NaN	-0.0989844	NaN	NaN	NaN	NaN	NaN	NaN	NaN	NaN	NaN	NaN	NaN	NaN	NaN	NaN	NaN	NaN	0.302758	0.169668	-0.617897	0.0140695	NaN	NaN		0	NaN		-4.34e-08	0		-4.34e-08	0		0	0.133089		0	0.0457353		0	NaN
RPS27	40S ribosomal protein S27		2	39.3	0	15.53	8603600000	-0.333007	-0.111835	-0.0481287	-0.113567	-0.279161	-0.306841	0.0994973	0.226878	0.115699	0.184598	0.0483758	-0.113473	-0.0616765	-0.277062	-0.0171834	0.111699	0.0878702	-0.035594	-0.130397	-0.0202088	-0.0767215	-0.136347	-0.152869	-0.0872888		0.164521	-0.0688659		0.414838	-0.107525		0.588658	0.173299		0.352265	-0.0457592		0.394875	-0.0865647		0.143845	-0.0456832
LRPPRC	Leucine-rich PPR motif-containing protein, mitochondrial		56	46.8	0	284.96	42301000000	0.183836	0.255199	0.293017	0.176961	0.214622	0.269392	-0.218363	-0.276101	-0.273483	-0.346555	-0.135935	-0.306805	-0.127274	-0.130066	-0.111368	-0.14178	-0.047577	-0.103705	0.425781	0.402395	0.391878	0.367818	0.447949	0.435522		0.86889	-0.0236921		0.0286833	-0.00711597		0.318107	0.0252149		1.18061	0.049054		1.88617	-0.143346	+	3.45314	0.36692
ACAA2	3-ketoacyl-CoA thiolase, mitochondrial		19	62	0	132.57	16961000000	0.0206267	0.00158601	0.131985	-0.0990154	0.0363276	0.0528332	-2.63469	-2.72881	-2.74352	-2.85768	-2.6708	-2.48487	-1.14392	-1.13422	-1.1346	-1.05931	-1.191	-1.17254	0.275961	-0.0788684	0.138945	0.225152	0.234501	0.107018		0.44575	-0.054684		0.0737258	0.0312251		0.0239621	-0.00336941		0.298404	0.110751		0.165948	-0.0436771	+	5.08377	1.18898
RPL35	60S ribosomal protein L35		8	42.3	0	32.193	42119000000	0.117429	-0.10597	-0.0384063	-0.116254	-0.181673	-0.361342	0.204516	-0.0383026	0.0761487	-0.0193751	0.0352017	-0.0345149	-0.295889	-0.00540581	-0.0593597	-0.183409	-0.0597806	0.0147838	0.31742	0.123401	0.372952	0.125783	0.16092	0.274053		0.998971	-0.210774		0.375643	-0.0870169		0.32383	0.0440832		0.114946	0.0434187		0.955756	-0.216361		0.428059	0.111236
ECE1	Endothelin-converting enzyme 1		16	27.5	0	43.945	4482900000	-0.188151	0.0869197	0.235237	0.107822	0.0194884	-0.0836457	-0.385808	-0.174849	-0.0947415	-0.478407	-0.230008	-0.33179	0.222063	0.334911	-0.0199893	0.427284	0.358509	0.508023	0.125783	0.420401	0.394185	0.372618	0.441696	0.304044		0.0547633	-0.0301137		0.833195	-0.128269		0.639539	0.252277		0.392785	-0.105227	+	1.31723	-0.351066		0.342546	-0.134326
SLC1A4	Neutral amino acid transporter A		6	15.4	0	15.424	2342600000	NaN	NaN	1.74975	0.96798	NaN	1.05367	1.48213	NaN	2.85619	1.32349	2.0432	2.86431	NaN	0.157949	NaN	NaN	NaN	0.483777	0.424815	1.8953	NaN	1.08475	2.15384	0.593115		0	-0.696081		0.273614	-0.0752571		0	NaN		0.530774	-0.981059		0	0.259725		0	1.5918
PAFAH1B1	Platelet-activating factor acetylhydrolase IB subunit alpha		4	13.9	0	12.766	414360000	0.0712136	NaN	0.444137	NaN	NaN	0.168514	NaN	NaN	NaN	NaN	NaN	NaN	NaN	NaN	NaN	NaN	NaN	NaN	0.103934	-0.0737425	NaN	NaN	NaN	0.301588		0	-0.275623		-4.34e-08	0		-4.34e-08	0		0	0.177676		0	0.331418		0	NaN
MCAM	Cell surface glycoprotein MUC18		16	31	0	83.891	10625000000	0.341417	0.373398	0.440314	0.985865	0.6219	0.540523	-0.151554	-0.370023	-0.0445384	-0.149361	0.0434844	-0.0555463	0.817378	0.820812	0.71519	0.823586	0.797096	0.734916	0.651775	0.579277	0.617863	0.723602	0.50711	0.570074		0.748535	0.331053		0.361347	0.134898		0.01804	0.000739157		0.343151	-0.0639276	+	2.09524	-0.255204	+	3.04056	-0.399417
GPD2	Glycerol-3-phosphate dehydrogenase, mitochondrial;Glycerol-3-phosphate dehydrogenase		11	23.4	0	39.524	2780600000	-0.229044	NaN	-0.140269	-0.231363	0.148348	-0.204632	-0.464266	-0.336683	-0.374954	-0.519735	NaN	-0.399426	-0.48997	-0.377351	-0.085956	-0.580289	NaN	-0.219001	-0.866778	-0.342122	-0.546077	-0.343696	-0.282158	-0.206113		0.321411	-0.0333408		0.628029	-0.0399706		0.919651	-0.111682		0.0544708	-0.0410513		1.02505	0.225975		0.333787	0.133102
RANBP1	Ran-specific GTPase-activating protein		6	49	0	27.435	4073800000	0.139208	-0.115379	-0.205281	-0.174621	-0.0106575	-0.232481	0.00791302	0.0458623	-0.0758393	0.0655723	0.0381553	-0.0127082	-0.0345297	-0.0184834	-0.0118498	0.206893	-0.0697092	0.0328061	0.266397	0.365916	0.229465	0.207143	0.269991	0.523963		0.229881	-0.0787693		0.620755	0.0376944		0.337836	0.0782843		0.255667	0.0859421	+	1.34015	-0.327992		0.139022	-0.0388629
NAMPT	Nicotinamide phosphoribosyltransferase		19	55.2	0	123.35	6820300000	NaN	1.05415	1.19396	1.26321	1.16543	1.4567	0.932968	0.773068	0.673014	0.974236	0.630405	0.867422	0.687956	-0.0472043	0.295253	0.892741	NaN	0.666848	-0.779125	-0.828076	-0.744608	-0.968181	-0.753993	-0.909661		0.610906	0.187008		0.107632	0.0310044		0.746311	0.288189		0.579553	0.0326951	+	3.55732	1.97101	+	1.20748	0.812056
PSMC4	26S protease regulatory subunit 6B		11	37.8	0	38.939	3999900000	-0.516863	-0.453676	-0.384226	0.195726	0.185359	0.455229	-0.332044	-0.209895	-0.00865324	0.256648	0.431248	0.348459	0.490262	0.482125	0.436162	0.288063	0.768332	0.974383	0.182311	-0.0684985	-0.100082	-0.429926	0.00690831	0.163756	+	2.19641	0.730359	+	1.58256	0.528983		0.355911	0.20741		0.798213	0.317161		0.969907	-0.252086	+	4.59857	-0.921105
VDAC2	Voltage-dependent anion-selective channel protein 2		13	59.5	0	201.4	107900000000	1.94946	2.00809	2.01067	1.96813	2.16498	2.01582	1.03527	0.969012	0.939227	0.939001	0.906737	0.846393	0.193204	0.225645	0.207643	0.420401	0.402286	0.309409	-1.16929	-1.15798	-1.17056	-1.16812	-1.17241	-1.21961		0.468493	0.0602335		1.78987	-0.0837935		1.35955	0.168535		0.534095	-0.021549	+	7.9832	3.15496	+	6.84846	1.78058
USP5	Ubiquitin carboxyl-terminal hydrolase 5		12	22.4	0	116.29	9567500000	-0.104992	-0.388148	-0.217323	0.090447	0.0703893	-0.118617	0.158337	-0.114457	0.260748	-0.196343	NaN	-0.228385	-0.101614	-0.0604424	-0.014179	0.0703893	-0.0367182	-0.150497	-0.275018	-0.383398	-0.31276	-0.282772	-0.196905	-0.330828		0.839284	0.250894		0.997432	-0.421907		0.0733379	0.019803		0.412988	0.0587262		0.438267	0.089489		0.968749	-0.178076
RANGAP1	Ran GTPase-activating protein 1		21	46.5	0	60.61	4955400000	-0.237677	-0.121283	-0.256235	-0.0556513	0.0284276	-0.331681	-0.117521	0.1129	-0.120184	0.188781	0.1038	-0.158124	-0.0503082	0.0323829	-0.0940177	0.253747	0.0831111	0.0130691	0.357946	0.333538	0.169412	0.131721	0.0404014	0.165044		0.39571	0.0854299		0.287997	0.0864208		0.737914	0.153957		0.157268	-0.0237601	+	2.28947	-0.416622		1.39234	-0.16775
RPL27A	60S ribosomal protein L27a		13	48.6	0	73.946	95582000000	-0.0887916	-0.128566	-0.0550067	-0.123151	-0.228976	-0.211114	0.31487	0.350271	0.348572	0.331361	0.218223	0.16543	0.103665	0.124593	0.110497	0.0714881	0.179129	0.211884	0.240497	0.214	0.24817	0.275484	0.186754	0.22033		0.957291	-0.0969589		0.623016	-0.0995665		0.395431	0.0412488		0.397775	-0.0300244	+	3.57906	-0.336673	+	3.11112	-0.203707
RPL5	60S ribosomal protein L5		13	41.8	0	36.234	10513000000	-0.327059	-0.285214	-0.309735	-0.329359	-0.376114	-0.286164	-0.218817	-0.135539	-0.101784	-0.184277	-0.323191	-0.277726	-0.20136	-0.143166	-0.152292	-0.245318	-0.0766454	-0.202406	0.121015	0.0107799	0.111031	0.24245	0.0585242	0.204391		0.242574	-0.0232098		0.571836	-0.109685		0.0803512	-0.00918373		0.0403826	0.00655648	+	2.48622	-0.428756		2.54173	-0.14173
RPL21	60S ribosomal protein L21		11	44.4	0	38.22	31800000000	-0.135998	-0.0840891	-0.0178844	-0.136712	-0.144648	-0.14642	0.411101	0.325732	0.210389	0.332507	0.273814	0.126312	0.0799754	0.0936954	0.0932897	0.0561673	0.116631	0.22033	0.427177	0.306379	0.339936	0.333882	0.179001	0.247077		0.640635	-0.0632692		1.72717	-0.0715291		0.351547	0.0420559		0.176803	-0.0423137	+	3.46733	-0.406056		2.08891	-0.168311
RPL28	60S ribosomal protein L28		21	68.6	0	200	168570000000	-0.115598	-0.127116	-0.115894	-0.169453	-0.165499	-0.175957	0.121148	0.152638	0.138028	0.000144286	0.0753272	0.0315363	0.00518438	-0.057737	-0.0524461	-0.0188634	-0.0268369	0.010923	0.272501	0.172743	0.226262	0.287945	0.228603	0.307778		1.80293	-0.050767		1.80641	-0.101602		0.341288	0.0234071		0.511387	0.040644	+	3.31692	-0.34852		1.83635	-0.0845364
IQGAP1	Ras GTPase-activating-like protein IQGAP1		57	47	0	323.31	40854000000	0.288299	0.334339	0.393416	0.250113	0.394075	0.416948	0.10541	0.184344	0.220082	0.224411	0.1956	0.199751	0.107554	0.183328	0.0893625	0.119423	0.185613	0.117163	-0.37159	-0.218346	-0.336683	-0.279599	-0.448922	-0.334134		0.186029	0.0150268		0.321874	0.0366418		0.696895	0.0139848		1.18654	-0.106673	+	3.75693	0.616894		2.14425	0.211937
STT3A	Dolichyl-diphosphooligosaccharide--protein glycosyltransferase subunit STT3A		13	19.7	0	47.568	7452600000	1.31655	1.2555	1.34119	1.14071	1.26712	1.24276	0.490262	0.457962	0.610511	0.608904	0.551295	0.447632	0.112767	-0.0460569	0.00158601	0.0694272	0.48944	0.128821	-0.864071	-0.877023	-0.724325	-0.852954	-0.693318	-0.854596		0.604284	-0.0875521		0.0593038	0.0163651		0.4531	0.206464		0.562528	0.0141055	+	5.60769	2.12251	+	4.74433	1.28165
PLA2G4A	Cytosolic phospholipase A2;Phospholipase A2;Lysophospholipase		19	36.7	0	73.019	8326800000	-0.138473	0.00532815	0.125916	-0.101443	0.264356	0.0231843	-0.48346	-0.52282	-0.504612	-0.395492	-0.269112	-0.547341	-0.365017	-0.748457	-0.558283	-0.169355	-0.456069	-0.383454	-1.00165	-0.940146	-1.05038	-0.820489	-0.619891	-0.620778		0.21973	0.0644423		0.437434	0.0996488		1.58788	0.220959		0.503274	0.189568	+	3.11639	0.934596	+	1.83703	0.554842
CAPZB	F-actin-capping protein subunit beta		13	60.3	0	67.264	7376200000	0.126048	-0.106017	0.0180643	-0.0619777	-0.144154	0.0333701	0.00432164	0.106214	0.0835197	0.00187425	-0.119981	0.132248	-0.164981	0.0220482	-0.0564162	-0.0992626	0.0328061	-0.0933864	0.246347	0.20364	0.238542	0.0936954	0.12618	0.332278		0.434773	-0.0702856		0.258768	-0.0599715		0.154567	0.0131688		0.197276	0.0563093		0.971709	-0.165927		0.38657	0.0791483
QARS	Glutamine--tRNA ligase		31	50.1	0	323.31	18080000000	1.08787	1.25653	0.733181	1.26694	1.30293	1.07922	0.973134	0.771801	0.72369	1.01385	0.988776	0.90589	0.281431	0.36233	0.420401	0.378068	0.193204	0.287	-1.66786	-1.64516	-1.35332	-1.54608	-1.44301	-1.52467		0.798397	0.190505		0.947994	0.146632		0.304082	-0.0686304		0.349793	-0.0303232	+	3.86923	2.54071	+	1.86701	0.671139
RPL29	60S ribosomal protein L29		5	23.3	0	24.283	22939000000	0.0385766	-0.0091903	0.229957	-0.0541077	-0.195219	-0.116035	0.00374607	0.162855	-0.0373399	0.241474	0.0186342	-0.0405711	-0.0363188	-0.170459	-0.339765	-0.209278	-0.0713909	-0.0836915	0.295723	0.111966	0.295135	0.286526	0.303459	0.262674		0.973064	-0.208235		0.0901429	0.0300922		0.17014	0.0607274		0.32206	0.0560761		0.699628	-0.144761		1.10591	0.268629
ATP5O	ATP synthase subunit O, mitochondrial		9	47.4	0	42.789	19488000000	-0.199935	-0.143006	-0.249222	-0.225548	-0.204549	-0.308287	-0.343092	-0.303899	-0.241901	-0.277027	-0.344154	-0.261742	-0.314715	-0.349107	-0.370005	-0.288435	-0.260204	-0.207944	0.245739	0.247198	0.289362	0.295723	0.247685	0.283092		1.28297	-0.0487404		0.0191584	0.00198992		0.845678	0.0924145		0.583221	-0.0185894	+	3.80383	-0.474816		1.87981	0.147221
PREP	Prolyl endopeptidase		11	20.8	0	52.729	4183900000	NaN	NaN	NaN	NaN	1.40332	1.01092	1.11916	0.889396	1.05082	NaN	NaN	NaN	0.596458	0.249627	0.590051	0.558855	NaN	0.135535	-1.37445	-1.24171	-1.11173	-0.863284	-1.02974	-1.03201		0	NaN		0	NaN		0.349254	-0.246059		0.348127	-0.0731552		0	NaN		0	NaN
ME1	NADP-dependent malic enzyme		11	23.3	0	106.17	7605000000	0.946955	0.789854	0.974896	1.00698	1.44186	0.817623	1.11123	1.35795	0.844948	1.04278	NaN	1.2762	0.93395	0.624616	1.02545	1.15898	1.22873	1.05991	-0.804879	-0.774454	-0.786572	-0.770412	-0.763611	-0.972648		0.28037	0.184918		0.221699	0.181402		0.642683	0.287866		0.385423	-0.0699003	+	5.08	1.68105		0.115159	0.0425621
GCLM	Glutamate--cysteine ligase regulatory subunit		6	30.7	0	25.363	3366200000	0.915406	0.932439	0.608809	0.669118	0.834792	1.05415	0.537346	0.649661	1.27059	0.704075	0.769518	0.783918	0.822363	0.790355	0.903347	0.75232	0.371726	0.535157	0.0708015	0.164915	0.140124	-0.0139896	0.0994973	-0.0185711		0.0520693	0.0338029		0.10718	-0.0666951		0.922408	-0.28562		0.665371	-0.0464406	+	2.42678	0.721868		0.0623029	-0.0198034
CCT5	T-complex protein 1 subunit epsilon		27	67.1	0	259.34	29940000000	0.325041	0.294312	0.463413	0.415434	0.458697	0.240009	0.562279	0.354452	0.395172	0.353097	0.364124	0.49293	0.286881	0.341644	0.57192	0.589476	0.456806	0.682573	-0.0897739	-0.0217751	0.0874628	-0.0455803	-0.104325	-0.125085		0.0278398	0.010458		0.127381	-0.0339174		0.965117	0.176137		0.985735	-0.113097	+	2.2304	0.35422		0.143151	-0.0392263
CD97	CD97 antigen;CD97 antigen subunit alpha;CD97 antigen subunit beta		3	4.3	0	22.126	1001800000	NaN	NaN	0.173	0.279412	NaN	0.16633	-0.428624	-0.296261	NaN	NaN	-0.286779	-0.198543	-0.302813	-0.281228	NaN	-0.271496	NaN	-0.305771	-0.402664	NaN	-0.627649	NaN	-0.418543	NaN		0	-0.0066697		0	0.00948203		0	0.0313172		0	0.209107		0	0.800649		0	0.46502
MARCKSL1	MARCKS-related protein	+	7	75.4	0	46.745	6112000000	-0.888114	-0.997117	-0.880259	0.499068	0.498557	0.643856	-0.667241	-0.497975	-0.304683	0.710349	0.708408	0.483571	0.616358	0.500496	0.683113	1.62877	1.3691	1.24659	1.51369	0.237441	0.368489	0.237319	1.48063	1.6233	+	3.09387	1.46899	+	1.6308	1.12408	+	1.59543	0.814834	+	2.40053	1.25813	+	4.50398	-1.20291	+	4.69612	-1.52182
RPL34	60S ribosomal protein L34		10	42.7	0	49.429	78664000000	0.03492	-0.199007	-0.16427	-0.216686	-0.270539	-0.263646	0.0836559	0.10742	-0.00684012	0.0253123	-0.00382825	-0.0519824	-0.0940177	-0.100438	-0.157946	-0.0871356	-0.0905264	0.00129788	0.211261	0.102053	0.277866	0.317651	0.172231	0.333996		0.892032	-0.140838		1.14738	-0.071578		0.43939	0.0586792		0.0339776	0.00663946	+	1.593	-0.341976		0.0358653	0.00801496
LMAN1	Protein ERGIC-53		5	11.8	0	7.5322	996310000	-0.0661555	-0.221522	-0.165434	-0.274878	NaN	-0.4281	NaN	NaN	-0.126801	NaN	NaN	NaN	-0.40635	NaN	NaN	NaN	NaN	NaN	-0.37215	NaN	-0.411119	-0.351369	-0.406732	-0.431481		1.13945	-0.235694		0	NaN		0	NaN		0.271791	-0.0378631	+	1.4559	0.230206		0	0.255312
NASP	Nuclear autoantigenic sperm protein		17	30.1	0	112.65	15424000000	0.211511	0.190299	0.0589399	0.0526941	0.314406	0.0460021	0.246226	0.131063	0.115166	0.203139	0.264837	0.299479	0.251446	0.0847447	0.210763	0.105008	0.259303	0.154972	0.458277	0.436162	0.505078	0.327802	0.462681	0.429		0.0635873	-0.0158822		0.50169	0.0916666		0.0306336	-0.00922394		0.234619	0.0269718	+	1.73148	-0.269431		0.155241	-0.0287349
FASN	Fatty acid synthase;[Acyl-carrier-protein] S-acetyltransferase;[Acyl-carrier-protein] S-malonyltransferase;3-oxoacyl-[acyl-carrier-protein] synthase;3-oxoacyl-[acyl-carrier-protein] reductase;3-hydroxyacyl-[acyl-carrier-protein] dehydratase;Enoyl-[acyl-carrier-protein] reductase;Oleoyl-[acyl-carrier-protein] hydrolase		71	39.5	0	323.31	43737000000	1.34346	1.13106	1.10165	1.03682	1.13698	1.43813	0.934177	0.937721	1.07957	1.0425	0.983532	1.00195	0.954196	0.799668	0.997039	0.577441	0.718877	0.910886	0.00532815	0.363003	0.189919	0.249506	0.0263043	0.196859		0.0201514	0.0119182		0.163359	0.0255063		0.688309	-0.181233		0.782589	-0.191312	+	3.26698	0.924583		1.32824	0.275091
CCT3	T-complex protein 1 subunit gamma		28	56.9	0	177.96	45918000000	0.372841	0.40523	0.462052	0.272382	0.413702	0.398241	0.481712	0.454176	0.381837	0.485427	0.52657	0.549028	0.504265	0.50284	0.592254	0.60502	0.524264	0.764686	0.434455	0.406319	0.443713	0.466444	0.31545	0.327228		0.608884	-0.0519327		0.639854	0.0810999		0.814865	0.0982042		0.556058	-0.0797812		0.334116	-0.025451		1.41454	-0.119745
TUFM	Elongation factor Tu, mitochondrial		23	63.7	0	130.3	22590000000	-0.0973784	-0.107011	0.0366088	0.012068	-0.285126	-0.0378582	0.012068	-0.0876873	-0.222784	-0.244002	-0.30381	-0.124424	-0.216971	-0.319063	-0.128614	-0.230973	-0.108363	-0.256166	0.305445	0.236829	0.194339	0.245617	0.281431	-0.0132615		0.202305	-0.0477119		0.417981	-0.124611		0.0766638	0.0230486		0.103203	-0.0343903	+	2.34273	-0.281522		1.08221	0.165623
ALDH7A1	Alpha-aminoadipic semialdehyde dehydrogenase		12	36.4	0	32.603	4449800000	-0.221489	0.0662615	-0.48833	-0.171206	-0.419681	-0.0156075	-0.209311	-0.408684	-0.38896	-0.31147	0.0183493	-0.0198431	-0.345564	-0.500096	-0.166325	-0.303223	-0.733411	NaN	0.0532504	0.101247	0.196481	-0.133828	0.0387171	-0.191294		0.0138899	0.0123541		0.520717	0.23133		0.211627	-0.095487		0.886938	-0.087742		0.647538	-0.269152		0.261951	0.122809
AARS	Alanine--tRNA ligase, cytoplasmic		28	40.2	0	161.48	13786000000	0.2529	0.263876	0.304044	0.231924	0.224658	0.203389	-0.15457	0.0528332	-0.0743043	-0.117177	-0.0447467	0.0712136	-0.267913	-0.214023	-0.271531	-0.278671	-0.397904	-0.264166	0.0302654	0.190552	0.199374	0.180275	0.181548	0.106884		0.806624	-0.0536163		0.139659	0.0284437		0.383557	-0.0624248		0.74352	-0.0838345		2.14518	0.0835395	+	4.56991	0.524762
SARS	Serine--tRNA ligase, cytoplasmic		11	28.2	0	21.628	2575800000	0.703012	0.92448	NaN	1.02439	0.790856	0.743213	0.751806	0.786011	0.177599	0.344033	1.0997	-0.371105	0.826193	0.545079	0.445197	0.634221	NaN	0.566864	1.11377	1.00274	0.701771	0.674551	0.693498	1.22497		0.124445	0.093877		0.295329	-0.214263		0.0656948	-0.0351522		0.48351	0.217724		0.0436095	0.020726		0.515498	0.208257
PSMB3	Proteasome subunit beta type-3		1	36.1	0	16.802	1649600000	NaN	NaN	0.408386	NaN	NaN	-0.493662	-0.165806	-0.223963	NaN	NaN	NaN	NaN	0.104873	-0.24542	NaN	-0.456464	NaN	NaN	0.067501	-0.149265	0.205893	-0.229518	-0.252552	-0.115316		0	-0.902048		0	NaN		0	-0.561338		0.066305	-0.0424927		0	0.466016		0	0.478659
PSMB2	Proteasome subunit beta type-2		9	39.8	0	33.297	4098800000	-0.0277779	-0.238647	-0.0581274	0.0465609	NaN	0.591488	0.146525	NaN	0.132643	NaN	-0.0275426	0.255561	0.556699	0.612211	0.214125	NaN	0.0540844	0.262072	-0.409393	-0.272524	-0.501586	-0.270295	-0.0867678	-0.252415		0.369101	0.361977		0	0.122918		0.256054	-0.255089		0.215153	0.0986095		1.11625	0.239951	+	1.80761	-0.569196
ACADVL	Very long-chain specific acyl-CoA dehydrogenase, mitochondrial		17	33.9	0	89.2	6382200000	-0.15311	-0.853084	-0.152548	-0.45038	-0.133859	-0.664585	-1.08495	-0.691336	-0.531594	-1.18443	-0.491571	-0.781157	-0.5429	-0.813626	-0.831563	-0.693364	-1.06981	-1.01249	0.0885487	-0.0312825	-0.0160014	0.113834	-0.0522665	-0.0892366		0.0249496	-0.0300277		0.129263	-0.0497589		1.60586	-0.19586		0.148261	-0.0398348		0.792716	-0.408431		0.612532	0.343116
HINT1	Histidine triad nucleotide-binding protein 1		7	78.6	0	28.361	3954300000	0.0923428	NaN	0.0326651	0.0291349	0.196733	0.0892269	NaN	0.109294	0.0479571	0.277033	NaN	0.129745	0.139731	0.322851	0.183455	0.0176369	-0.267792	0.169027	0.306496	0.108892	0.242084	0.276913	0.0368901	0.205518		0.0156033	-0.00332304		0	0.0817875		0.516961	-0.242388		0.0732873	-0.0263289		0.899704	-0.146793		0.875614	-0.152842
GMPS	GMP synthase [glutamine-hydrolyzing]		17	34.9	0	80.945	5587300000	0.0835197	0.28629	0.190552	0.568227	0.41565	0.248656	0.294782	0.366924	0.1644	0.213627	NaN	0.247198	0.013641	0.0919367	0.0630887	0.0828389	0.169797	0.207643	-0.63803	-0.813677	-0.627694	-0.835162	-0.71506	-0.718806		0.635325	0.224057		0.00277969	0.000821576		1.25905	0.0972041		0.316949	0.0682127	+	3.36881	0.945631		0.973019	0.130565
GNAQ	Guanine nucleotide-binding protein G(q) subunit alpha		1	7.8	0	7.5508	364770000	NaN	NaN	NaN	NaN	NaN	NaN	NaN	NaN	NaN	NaN	NaN	NaN	NaN	0.150949	NaN	NaN	NaN	NaN	NaN	0.689389	0.46999	0.62714	NaN	NaN		-4.34e-08	0		-4.34e-08	0		0	NaN		0	NaN		0	NaN		0	NaN
GDI2	Rab GDP dissociation inhibitor beta		16	66.1	0	273.66	37614000000	0.151469	0.0727232	0.125122	-0.110402	0.041243	0.00647761	0.0985544	0.120883	0.0363276	0.0880058	0.0387171	0.1141	0.140909	0.120617	0.154583	0.262313	0.0294175	0.0905825	-0.19904	-0.285337	-0.28488	-0.196244	-0.294579	-0.364422		0.750704	-0.137332		0.0342898	-0.00498046		0.0547374	-0.0112658		0.142277	-0.030527	+	3.23237	0.371925		0.370435	-0.0222652
EMD	Emerin		3	17.8	0	15.705	862790000	-0.284405	0.531668	NaN	-0.367136	-0.0397848	NaN	NaN	NaN	-0.139903	NaN	NaN	-0.102667	NaN	NaN	NaN	NaN	NaN	NaN	-0.805434	NaN	NaN	-0.791008	-0.512411	-0.456841		0.388839	-0.327092		0	0.0372366		-4.34e-08	0		0	0.334168		0	0.91464		0	NaN
CPT1A	Carnitine O-palmitoyltransferase 1, liver isoform		39	49.9	0	305.29	68093000000	3.38819	3.03034	1.82542	2.29384	2.50045	3.28323	2.36684	2.29737	2.35538	2.32591	2.10986	2.14336	1.69033	1.66617	1.64284	1.70332	1.71848	1.77993	-1.99424	-1.88886	-1.92879	-1.89969	-2.01765	-2.02891		0.0225594	-0.0554777		0.955509	-0.146821		0.684614	0.0674675		1.93572	-0.10782	+	3.22346	4.65376	+	1.07503	1.08154
SERPINH1	Serpin H1		18	52.2	0	221.17	37089000000	0.955462	0.781402	0.873892	0.874049	0.971737	0.841168	0.646255	0.57124	0.594453	0.521855	0.679604	0.730836	0.53446	0.478299	0.371503	0.446362	0.547943	0.414027	0.476226	0.397584	0.380951	0.286763	0.355016	0.421264		0.102322	0.0253996		0.170441	0.0401155		0.0534148	0.00802351		0.500732	0.0624028	+	2.96836	0.515152	+	2.38242	0.408831
ST13;ST13P5;ST13P4	Hsc70-interacting protein;Putative protein FAM10A5;Putative protein FAM10A4		10	29.3	0	41.801	13774000000	0.504163	0.278936	0.443607	0.619272	0.330099	0.336283	0.581689	0.356595	0.351628	0.498659	0.444985	0.60966	0.40621	0.274053	0.306729	0.38405	0.538637	0.558953	-1.06428	-1.02971	-0.974773	-1.05095	-1.07698	-1.01812		0.0999944	0.0196498		0.331032	0.0877977		0.657244	0.164883		0.329892	-0.0346509	+	4.44168	1.42738		0.438443	0.0799046
VASP	Vasodilator-stimulated phosphoprotein		5	16.6	0	8.4609	625490000	-0.110791	NaN	0.327457	0.278817	NaN	NaN	NaN	NaN	NaN	NaN	NaN	0.714048	NaN	NaN	NaN	NaN	NaN	NaN	0.235359	NaN	-0.100747	0.0608775	NaN	NaN		0	0.389609		0	NaN		-4.34e-08	0		0	NaN		0.195185	0.128268		0	NaN
DNM2	Dynamin-2		1	4	0.00056593	3.2558	351680000	0.112633	NaN	NaN	NaN	NaN	0.265677	NaN	NaN	NaN	NaN	NaN	NaN	0.0476779	NaN	NaN	NaN	NaN	NaN	-0.516471	-0.327728	-0.205264	-0.23143	-0.573317	-0.36857		0	NaN		-4.34e-08	0		0	NaN		1.09364	-0.231311		0	0.367441		0	0.0649555
RPL14	60S ribosomal protein L14		12	39.1	0	38.971	24362000000	0.476226	0.225028	0.469886	0.337654	0.33182	0.285698	0.852239	0.836894	0.794104	0.968054	0.911423	0.791939	0.447632	0.501617	0.626112	0.538041	0.704252	0.661658	0.5655	0.589763	0.546759	0.755913	0.645333	0.655901		0.293148	-0.0719894		0.675244	0.0627267		0.807491	0.10953		0.0477535	-0.00856712		1.08236	-0.240432		0.61671	-0.13474
CCT8	T-complex protein 1 subunit theta		31	62.6	0	134.86	41379000000	0.385044	0.436482	0.404794	0.542308	0.516721	0.379066	0.472592	0.60966	0.498761	0.62368	0.637935	0.56179	0.404576	0.341872	0.622743	0.562474	0.429107	0.564427	0.286526	0.28404	0.292899	0.343124	0.151469	0.216238		0.502106	0.0705917		0.80237	0.0807971		0.365443	0.0622725		0.715967	-0.0886101		1.89905	0.102086		0.213995	-0.0476236
CCT4	T-complex protein 1 subunit delta		24	56.2	0	187.36	41159000000	0.404031	0.299596	0.473527	0.395721	0.470094	0.405448	0.451435	0.423632	0.309409	0.350837	0.461005	0.51783	0.436802	0.359971	0.41846	0.446574	0.475396	0.417812	0.214871	0.105946	0.220082	0.24062	0.0765591	0.0882773		0.152213	0.0313695		0.192186	0.0483983		0.421085	0.0415166		0.265546	-0.0623137		1.441	0.203502		0.0805938	-0.0126926
ANXA11	Annexin A11		12	25.4	0	59.901	6318400000	-0.183638	-0.192151	-0.0767823	-0.275577	-0.356661	-0.208561	-0.518929	-0.644871	-0.628809	-0.811751	-0.654513	-0.483904	-0.587446	-0.719044	-0.445519	-0.518432	-0.540757	-0.78824	-0.765033	-0.735428	-0.759649	-0.60542	-0.721516	-0.923523		1.59692	-0.129409		0.141648	-0.0525197		0.0656947	-0.0318069		0.352139	-0.103192	+	3.086	0.549309	+	2.11425	0.433146
RAB5C	Ras-related protein Rab-5C		3	27.8	0	23.996	1964000000	0.411101	NaN	0.12618	-0.425734	-0.0532841	NaN	0.314755	NaN	NaN	-0.364496	0.42191	-0.0785485	0.359521	NaN	NaN	NaN	NaN	NaN	-0.0981657	0.158208	-0.435573	0.159112	0.239154	0.144308		0	-0.836835		0	-0.679251		0	NaN		0.169234	0.134516		0.459646	0.308058		0	-0.0908808
RAB7A	Ras-related protein Rab-7a		11	61.8	0	67.43	6502900000	-0.0606832	0.186501	-0.0200039	-0.130239	-0.0785789	-0.0690735	0.0311129	-0.0106139	-0.0361708	-0.0764629	-0.090081	0.0127832	-0.142672	0.00187425	0.00748262	-0.005623	0.012068	-0.219337	-0.144808	-0.151186	-0.0570614	-0.103674	0.032242	-0.321603		0.689732	-0.127902		0.356334	-0.0460296		0.0826203	-0.0265257		0.154636	-0.0407493		0.791742	0.139245		0.366277	0.0797095
SSR4	Translocon-associated protein subunit delta		4	30.6	0	18.381	3010100000	0.171463	0.0199154	0.245861	0.319387	0.14496	0.227618	-0.536691	-0.474272	-0.470849	-0.230973	NaN	-0.415345	-0.695886	-0.171401	-0.869728	-0.107104	-0.213487	-0.088853	0.0104934	-0.125777	-0.141939	0.032524	0.33182	0.033652		0.612471	0.0849085		0.413788	0.180611		0.663565	0.442524		0.546329	0.203719		1.21474	0.224144	+	1.52052	0.724751
BCAP31	B-cell receptor-associated protein 31		6	24	0	6.9944	1809100000	0.742696	0.425996	0.51924	0.502025	0.256286	0.386038	0.27965	0.475293	0.139339	-0.0399183	-0.22754	0.489337	0.260146	-0.0476813	0.0877344	0.0301242	-0.307305	0.219834	-0.0179428	-0.0580374	0.106214	-0.164011	0.187134	0.431142		1.53749	-0.181194		0.265967	-0.224134		0.352775	-0.119182		0.504292	0.238722	+	2.09696	0.601256	+	1.63229	0.462578
CAV2	Caveolin-2;Caveolin		4	40.3	0	41.049	14398000000	0.596554	0.612777	0.606916	0.496718	0.54092	0.494262	0.789187	0.853916	-1.02876	0.754888	0.621993	0.893595	1.12254	0.986739	1.1123	-0.306038	0.828063	0.597793	1.68912	1.70969	1.72539	2.12717	2.21798	1.70523		1.8022	-0.0947822		0.295623	0.552046		0.687895	-0.700587		0.0197912	0.0166902	+	3.09847	-1.24867	+	3.35896	-0.468444
ALDH3A2	Fatty aldehyde dehydrogenase		11	27.2	0	40.75	8573400000	1.18846	1.7835	1.44191	1.95736	1.38824	1.54923	0.610417	0.643302	0.55454	0.824971	0.837217	0.769941	0.520246	0.687419	0.582171	0.835197	0.823423	0.502432	-0.148833	-0.373308	-0.199173	-0.196575	0.00403388	-0.179335		0.16669	0.160319		2.94335	0.207957		0.407283	0.123739		0.815277	0.148307	+	3.1624	1.72764	+	2.08884	0.874678
HSD17B4	Peroxisomal multifunctional enzyme type 2;(3R)-hydroxyacyl-CoA dehydrogenase;Enoyl-CoA hydratase 2		39	65.6	0	323.31	135270000000	4.15923	4.57906	3.98577	3.84449	3.97416	4.63157	1.70863	1.65718	1.698	1.75009	1.64242	1.60583	-0.148417	-0.17093	-0.12378	-0.398969	-0.428372	-0.322938	-0.57278	-0.849076	-0.746567	-0.768494	-0.534349	-0.57025		0.0800566	-0.0912802		0.200694	-0.0218217		2.21969	-0.235718		1.96498	0.228919	+	5.02154	5.0294	+	4.80759	4.38906
PSMD7	26S proteasome non-ATPase regulatory subunit 7		3	17.3	0	12.064	422220000	NaN	NaN	NaN	NaN	NaN	NaN	NaN	NaN	NaN	NaN	NaN	NaN	NaN	NaN	NaN	NaN	NaN	NaN	NaN	NaN	NaN	NaN	-0.730464	-0.996916		-4.34e-08	0		-4.34e-08	0		-4.34e-08	0		0	NaN		-4.34e-08	0		-4.34e-08	0
VAMP7	Vesicle-associated membrane protein 7		6	28.6	0	13.537	1350500000	1.13901	1.28771	1.74898	0.947704	1.45633	1.08257	-0.111991	-0.0474428	-0.0957278	-0.0731352	-0.230347	-0.0886535	0.926835	NaN	1.14143	1.48109	NaN	1.20495	1.22786	1.64473	1.39583	NaN	1.12902	1.73231		0.354157	-0.229698		0.238544	-0.0456579		0.36921	0.30889		0.861548	-0.34184		0.187929	-0.128383		0.60541	0.357765
RPS6KA3	Ribosomal protein S6 kinase alpha-3		2	7.8	0	4.9448	158810000	NaN	NaN	NaN	NaN	NaN	NaN	NaN	NaN	NaN	NaN	NaN	NaN	NaN	NaN	NaN	NaN	NaN	NaN	-0.896066	NaN	NaN	NaN	NaN	-0.713734		-4.34e-08	0		-4.34e-08	0		-4.34e-08	0		0	NaN		-4.34e-08	0		-4.34e-08	0
PGD	6-phosphogluconate dehydrogenase, decarboxylating		23	61.9	0	156.69	37553000000	0.483261	0.476952	0.584866	0.466653	0.364797	0.466236	0.324696	0.333767	0.416407	0.213254	0.310573	0.490057	0.382833	0.236585	0.261952	0.324696	0.31313	0.356031	0.415975	0.424385	0.470511	0.398788	0.350724	0.263035		0.887452	-0.0824647		0.130597	-0.0203289		0.286391	0.0374955		0.798109	-0.0879836		0.962216	0.0837986		1.74698	0.221237
HNRNPM	Heterogeneous nuclear ribonucleoprotein M		31	52	0	159.62	22435000000	0.314522	0.108357	0.320196	0.257011	0.406754	0.301237	0.155749	0.284159	0.265437	0.380397	0.201634	0.265317	0.330902	0.286763	0.212632	0.231187	0.290778	0.214498	0.0561673	0.109561	0.013641	-0.023475	0.0832474	0.146916		0.237181	0.0739754		0.182149	0.0473343		0.339857	-0.0312781		0.358678	0.0622012		1.25556	0.214449		0.138188	-0.0290738
KPNA2	Importin subunit alpha-1		21	57.3	0	298.5	41085000000	0.850959	1.06102	0.970044	0.979367	1.18123	1.10588	0.772139	0.768078	0.632734	0.805623	0.748032	0.676809	0.965987	0.860526	0.811307	0.821139	0.881116	0.98397	-1.15698	-1.1666	-1.1366	-1.1359	-1.19291	-1.18666		2.90765	0.128152		0.360551	0.0191708		0.0572412	0.0161349		0.578788	-0.0324808	+	5.35915	2.10704		0.462631	0.0813997
RAP1GDS1	Rap1 GTPase-GDP dissociation stimulator 1		11	29.7	0	30.873	2060800000	0.093425	0.992261	0.738206	NaN	0.917623	0.175429	0.755486	0.350158	0.263996	NaN	0.568129	0.285698	0.707171	0.835601	0.155102	0.332278	0.907967	NaN	0.239398	0.421372	0.287591	0.336626	0.18612	0.258217		0.380846	-0.318708		0.359694	0.119837		0.206632	-0.151263		1.21078	-0.120618		0.407159	0.259435		0.042177	0.042006
SLC7A2	Cationic amino acid transporter 2		10	18.5	0	26.678	3797900000	1.11829	NaN	NaN	0.661476	1.17153	0.99139	-1.04656	-1.23756	-1.3636	-1.39403	-1.49123	-1.08583	-0.661661	-0.532428	-0.53126	NaN	NaN	-0.874666	0.744506	NaN	NaN	0.777367	0.812211	0.744161		0	-0.456817		0.196934	-0.107789		0	-0.343406		0	-0.033206		0	0.340926		0	1.69341
HNRNPF	Heterogeneous nuclear ribonucleoprotein F;Heterogeneous nuclear ribonucleoprotein F, N-terminally processed		6	25.1	0	37.06	3205500000	0.148348	-0.300111	-0.0615561	-0.213855	-0.141955	0.0588013	0.225769	0.354001	0.140779	0.151989	NaN	0.151209	0.190172	0.221568	0.0475383	0.175812	0.0164963	0.195221	0.399335	0.291839	0.181929	0.296428	0.372952	0.520648		0.0540163	-0.0278969		0.229582	-0.0316745		0.0776132	-0.0239162		1.42604	0.174246	+	1.14336	-0.327838		0.732866	-0.224199
SMS	Spermine synthase		5	29.4	0	19.588	1532500000	NaN	-0.0951729	0.164529	NaN	-0.138632	-0.0372659	NaN	-0.00408866	-0.483884	NaN	NaN	NaN	NaN	0.181675	0.230449	NaN	NaN	NaN	0.422664	0.115832	0.0392789	0.0385766	0.211012	0.368601		0.437757	-0.122627		0	NaN		0	NaN		1.49576	0.26953		0.102812	-0.0298846		0.489394	-0.171384
THOP1	Thimet oligopeptidase		2	12.5	0	8.5939	4313000000	0.301237	0.0285691	NaN	0.0784732	NaN	0.123004	0.277747	NaN	NaN	NaN	NaN	NaN	0.532766	NaN	NaN	NaN	NaN	NaN	-0.524168	-0.588661	-0.562623	-0.730584	-0.672727	NaN		0	-0.222763		0	NaN		0	NaN		0.0771052	-0.0228055	+	2.13058	0.792192		0	-0.367863
AKR1C2	Aldo-keto reductase family 1 member C2		5	70.6	0	167.98	88164000000	2.35724	2.35426	2.29881	2.34406	2.54119	2.57291	1.76986	1.76137	1.76188	2.02382	1.9252	1.64441	1.979	2.01838	2.015	1.92554	1.99917	2.10111	0.0402613	-0.180626	-0.0557263	-0.117271	0.0370308	-0.127195		0.655081	0.149289		0.332315	0.100109		0.0339662	0.00448076		0.570754	0.10124	+	6.3418	2.45464	+	3.8915	0.332639
CAPZA1	F-actin-capping protein subunit alpha-1		4	25.9	0	8.1261	1455300000	NaN	-0.216552	NaN	1.07375	NaN	NaN	-0.412712	NaN	NaN	NaN	NaN	-0.00795675	NaN	NaN	NaN	NaN	0.162468	NaN	-0.194064	1.33708	NaN	0.29725	-0.0604875	-0.0440177		0	NaN		0	NaN		0	NaN		0.443228	-0.936207		0	-1.03372		0	NaN
BLVRA	Biliverdin reductase A		10	38.2	0	41.266	4233800000	1.42519	1.92926	1.61405	1.72609	1.71611	1.86156	1.8869	1.31359	1.61551	1.50172	1.90261	1.69225	1.79119	1.12221	1.20883	1.38045	NaN	1.56988	-1.36829	-1.2304	-1.2614	-1.10557	-1.05203	-1.31549		0.248601	0.111753		0.112842	0.0935254		0.0181487	-0.024843		0.121737	-0.0461479	+	4.29661	2.85529		0.477559	0.282091
SLC25A1	Tricarboxylate transport protein, mitochondrial		8	26	0	22.536	4353100000	1.32291	1.31881	1.7904	NaN	1.67455	1.09646	0.687688	0.725785	0.46634	0.563939	NaN	0.341758	0.44159	0.62854	0.258941	0.737946	0.552967	NaN	-0.936939	-0.891215	-0.718972	-0.919833	-0.847336	-1.01616		0.0960554	-0.169095		2.67044	-0.124165		0.181144	0.110392		1.191	-0.0901388	+	3.79183	2.32071	+	2.26213	1.03435
ACLY	ATP-citrate synthase		53	57.8	0	323.31	113300000000	0.963548	0.923644	1.04215	0.856149	1.0782	1.06571	1.07231	0.881038	0.885574	0.988194	0.957766	0.985282	0.847917	0.819423	0.83754	0.841812	0.816313	0.886433	-1.22331	-1.04278	-1.03531	-1.07923	-1.07954	-1.09271		0.105265	0.0235712		0.188545	0.0307726		0.270841	0.0132263		0.581815	-0.079408	+	6.16205	2.02889		1.77521	0.141489
SUCLG1	Succinyl-CoA ligase [ADP/GDP-forming] subunit alpha, mitochondrial		3	11.6	0	5.1143	293940000	NaN	NaN	-0.161395	NaN	NaN	-0.16372	NaN	-0.205214	NaN	0.795268	NaN	NaN	NaN	NaN	NaN	NaN	NaN	NaN	0.0654344	NaN	-0.0641179	0.0476779	NaN	0.388465		0	-0.00232524		0	NaN		-4.34e-08	0		0	0.340787		0	-0.153175		0	NaN
MVD	Diphosphomevalonate decarboxylase		3	13.5	0	19.603	737720000	NaN	NaN	NaN	NaN	NaN	NaN	NaN	NaN	NaN	NaN	NaN	NaN	NaN	NaN	NaN	NaN	NaN	NaN	-1.45858	NaN	-0.900099	NaN	-1.38131	-1.84991		-4.34e-08	0		-4.34e-08	0		-4.34e-08	0		0	-0.481211		0	NaN		-4.34e-08	0
COPB1	Coatomer subunit beta		12	18.5	0	44.671	4275100000	-0.0631378	0.00403388	0.00388999	-0.147841	-0.269043	-0.193437	0.192321	0.0261627	0.0312541	-0.404726	-0.296793	-0.0794628	-0.079158	-0.0103378	-0.0882394	-0.282913	-0.574218	0.104068	-0.550444	-0.176251	-0.552072	-0.267548	-0.415769	-0.147266		1.11101	-0.185036		0.870452	-0.343573		0.325635	-0.191776		0.0773876	-0.0392026	+	1.27497	0.313552		0.542744	0.0408404
COPA	Coatomer subunit alpha;Xenin;Proxenin		16	17.2	0	40.057	4135700000	-0.112927	-0.180103	-0.213287	-0.27446	-0.521929	-0.173271	-0.139013	-0.161024	-0.242567	-0.10507	0.024887	-0.036008	-0.037562	-0.110308	-0.461482	-0.0649325	-0.526369	-0.012621	-0.26675	-0.102233	-0.129766	-0.0530446	-0.461879	-0.406445		0.528176	-0.154447		0.918482	0.142138		0.00222797	0.00180992		1.38007	-0.283344		0.929711	-0.0737579		0.0912019	0.0343452
HCCS	Cytochrome c-type heme lyase	+	18	77.6	0	92.535	18179000000	-0.82452	-0.794482	-0.745648	2.16269	2.04527	2.05579	-0.656968	-0.627939	-0.65025	1.73044	1.70616	1.78647	1.16729	1.10809	0.952483	2.72524	2.3978	2.74749	2.25208	0.391878	0.391878	0.356031	2.43069	2.17501	+	3.41176	2.87613	+	3.81191	2.38608	+	2.05658	1.54756	+	2.90293	1.906	+	5.83982	-1.16815	+	4.97616	-1.86417
SLC16A1	Monocarboxylate transporter 1		5	13.2	0	25.873	3356600000	1.04411	0.623211	1.01478	NaN	0.63171	1.1698	0.526169	0.778629	0.456386	0.529971	0.76545	0.58111	0.553066	0.458172	0.409581	0.51652	0.464668	0.590722	-0.386299	-0.484772	-0.448194	-0.378175	-0.436041	-0.37887		0.332422	0.0817555		0.328589	0.0384491		0.277176	0.0503637		0.44329	0.0366439	+	3.17472	1.33108	+	1.3811	0.42043
RARS	Arginine--tRNA ligase, cytoplasmic		22	37	0	87.889	11136000000	0.844466	1.09997	1.33908	0.952035	0.950244	1.05631	1.00223	1.26742	0.86995	1.08733	0.96997	0.86378	0.632827	0.91196	0.834145	0.895613	0.941031	1.18694	-0.972733	-0.785975	-0.76756	-0.684503	-0.873239	-0.97211		0.352362	-0.10831		0.227473	-0.0728412		0.807481	0.214886		1.17561	-0.193347	+	3.64011	1.84052		0.847337	0.301528
CACNA2D1	Voltage-dependent calcium channel subunit alpha-2/delta-1;Voltage-dependent calcium channel subunit alpha-2-1;Voltage-dependent calcium channel subunit delta-1		12	16.2	0	48.102	1825800000	0.294077	0.339479	0.161694	0.31603	-0.089866	0.0395595	0.50019	0.264476	NaN	0.700617	NaN	NaN	NaN	NaN	NaN	NaN	NaN	NaN	-0.959627	-0.753118	-0.552622	-1.00468	-0.803066	-0.507542		0.500406	-0.176509		0	0.200427		-4.34e-08	0		0.0173122	0.0133958	+	2.73431	1.03522		0	NaN
YARS	Tyrosine--tRNA ligase, cytoplasmic;Tyrosine--tRNA ligase, cytoplasmic, N-terminally processed;Tyrosine--tRNA ligase		31	58.3	0	72.761	14746000000	0.449218	0.650581	0.690551	0.641176	0.700085	0.471552	0.555129	0.521654	0.728835	0.460166	0.472488	0.543298	0.282025	0.341644	0.275603	0.290071	0.274053	0.200128	0.494364	0.466027	0.544189	0.524365	0.507414	0.358059		0.0194978	0.00748744		0.953865	-0.109889		0.632635	-0.0450069		0.381219	-0.0582476		0.471977	0.0852567	+	1.72951	0.297026
RAD23B	UV excision repair protein RAD23 homolog B		9	36.2	0	52.926	3657700000	0.372618	0.610795	0.559639	0.51662	0.843341	0.535356	0.687419	0.633664	0.806613	0.486045	0.859174	0.678162	0.688762	0.517024	0.346078	0.830904	0.651224	0.577538	-1.07582	-1.12734	-1.15248	-1.2739	-1.14701	-1.22455		0.586114	0.117422		0.087959	-0.0347713		1.49082	0.169267		0.847977	0.0354447	+	4.42465	1.69892		0.00787556	-0.00293752
NAPA	Alpha-soluble NSF attachment protein		9	53.2	0	46.884	4033700000	0.360982	0.736908	0.476745	0.480886	0.566279	0.617393	0.393087	-0.118288	0.245861	0.217355	0.644318	0.153027	0.166587	0.00518438	0.349479	0.201007	0.290424	0.284159	-0.0468465	0.377512	0.101516	0.40882	0.0870554	0.129613		0.100396	0.0299743		0.195136	0.16468		0.299625	0.08478		0.734618	-0.239342		0.706224	0.228929		1.10701	0.351128
EIF5	Eukaryotic translation initiation factor 5		23	46.9	0	125.08	51775000000	3.28565	3.26947	3.1163	3.05707	3.15756	3.16385	3.20018	2.74054	2.88026	2.83178	3.087	2.94922	2.73643	2.72766	2.38507	2.49406	2.48189	2.27349	-1.83403	-1.84503	-1.80622	-1.82915	-1.81061	-1.92074		0.459947	-0.0976454		0.0237409	0.0156765		1.34183	-0.199909		0.329112	-0.0283269	+	7.07032	5.0506	+	2.04987	0.607419
CSE1L	Exportin-2		52	62.9	0	323.31	156100000000	1.16819	1.22632	1.2906	1.14104	1.20232	1.16511	0.919836	0.891808	0.906891	0.881743	0.955685	0.886355	0.797179	0.720891	0.763497	0.748633	0.814755	0.855511	-0.0778631	-0.119949	-0.0748968	-0.0917712	-0.0987373	-0.148801		0.659123	-0.0588818		0.0174	0.00174946		0.362372	0.0457776		0.154553	-0.0129279	+	5.40559	1.32391	+	3.44536	0.46785
VCP	Transitional endoplasmic reticulum ATPase		33	54	0	197.1	32341000000	-0.332716	-0.347142	-0.377838	-0.316798	-0.415672	-0.279879	-0.134224	-0.0550966	-0.0550366	-0.220295	-0.13741	-0.148465	-0.10757	-0.122177	-0.32009	-0.159912	-0.180626	-0.231515	-0.217809	-0.102155	-0.0121407	-0.0563112	-0.110978	-0.152163		0.106283	0.0151157		2.85509	-0.0872709		0.0498275	-0.00740516		2.45208	-0.103448	+	3.27174	-0.295696		1.14034	-0.169286
HADHB	Trifunctional enzyme subunit beta, mitochondrial;3-ketoacyl-CoA thiolase		15	36.9	0	48.542	4234200000	-1.68901	-1.70289	-1.70313	-1.76754	-1.68836	-1.70684	-2.00451	-2.00961	-1.9808	-2.238	-1.85888	-2.10209	-1.67043	-1.52255	-1.66191	-1.62162	-1.72375	-1.17857	-0.511691	-0.555439	-0.434481	0.234624	-0.42167	-0.367397		0.291558	-0.0225699		0.21362	-0.0680195		0.196121	0.110316		0.320223	-0.181821	+	2.38061	-1.44658		0.76483	-0.0800445
ADK	Adenosine kinase		7	36.7	0	22.919	6114400000	-0.30139	-0.0359489	0.321813	-0.549029	-0.414614	-0.1708	NaN	0.382501	0.00791302	-0.109904	1.81889	-0.343385	-0.209745	-0.353598	NaN	-0.38845	2.91869	0.00705191	-0.358214	-0.30536	-0.0587284	0.139469	-0.262227	-0.343019		1.46631	-0.372972		0.185286	0.542546		0.271864	1.54679		0.722377	-0.24628		0.114095	0.0696976		0.479659	0.276496
SEC13	Protein SEC13 homolog		1	22	0	25.557	1906900000	NaN	-0.437037	0.250355	-0.520935	-0.724778	-0.398475	NaN	NaN	NaN	-0.378363	NaN	NaN	-0.244531	NaN	0.0829751	NaN	NaN	-0.0993244	0.16221	0.385486	0.333538	-0.350743	NaN	-0.23265		0.630293	-0.468286		0	NaN		0	-0.1823		0.0916652	-0.0525917		0.203459	-0.216101		0.0102508	-0.0125628
OXCT1	Succinyl-CoA:3-ketoacid coenzyme A transferase 1, mitochondrial		12	31.7	0	93.48	9420200000	-0.181853	-0.015418	-0.0165266	-0.217759	-0.197716	-0.117255	-0.287167	-0.348886	-0.445873	-0.753069	-0.559792	-0.433662	-0.341519	-0.482492	-0.393577	-0.215128	-0.308287	-0.292634	0.163756	0.33594	0.276913	-0.0194774	0.201885	0.0594937		0.890234	-0.106311		0.602176	-0.221532		1.60573	0.133846		0.281281	-0.0560806		1.02635	-0.269058	+	2.08017	0.334597
EIF3B	Eukaryotic translation initiation factor 3 subunit B		22	32.6	0	70.486	5199200000	0.144438	-0.123214	0.0828389	0.18954	0.0848807	0.0604624	0.0874628	0.38659	0.196733	0.249385	0.321005	0.0229004	0.291132	0.300299	0.0370308	0.422448	0.109695	0.0939657	-0.685385	-0.652697	-0.597125	-0.468751	-0.513934	-0.511464		0.423017	0.0769401		0.0870068	-0.0258322		0.0024828	-0.000784494		0.0201775	0.00259649	+	2.47041	0.607545		0.670524	-0.1748
BID	BH3-interacting domain death agonist;BH3-interacting domain death agonist p15;BH3-interacting domain death agonist p13;BH3-interacting domain death agonist p11		3	22.1	0	39.443	1470600000	NaN	0.0913952	0.735349	NaN	NaN	NaN	NaN	0.211012	NaN	NaN	NaN	NaN	-1.40198	-1.86817	-1.85293	NaN	NaN	NaN	NaN	NaN	0.445833	NaN	NaN	0.500802		0	NaN		0	NaN		0	NaN		0	NaN		0	-0.0324606	+	2.19152	2.12107
MARS	Methionine--tRNA ligase, cytoplasmic		13	20.2	0	38.721	6550100000	-0.624888	-0.689311	0.26135	-0.430179	0.438293	0.750606	-1.10678	0.326307	0.349705	0.264476	0.232661	0.0886844	0.0749164	0.0586628	-0.000389593	0.218967	-0.147234	0.196355	-0.485317	-0.0420111	-0.332389	-0.381498	-0.345931	-0.259064		0.797043	0.603857		0.236219	0.338862		0.121501	0.0449662		0.236297	-0.111471		0.110391	-0.0989833		0.571822	-0.395346
EIF6	Eukaryotic translation initiation factor 6		4	26.9	0	19.576	4959400000	-1.63048	-0.466516	-1.90704	-2.06196	-1.7361	-1.77063	-1.67259	-1.90034	-0.418022	NaN	NaN	-1.73899	-0.634621	-2.45767	NaN	-0.353358	NaN	-1.70289	0.0366088	0.0139266	-0.000202008	-0.152436	0.102053	0.075738		0.481796	-0.521554		0	-1.32096		0	0.281263		0.725876	0.117704	+	1.35461	-1.28844		0.0825644	0.211469
TMEM33	Transmembrane protein 33		8	30.4	0	36.208	9398600000	0.816149	1.08141	0.937194	0.651316	1.03865	0.962956	0.456175	0.531768	0.238298	0.323774	0.479748	0.267116	-0.254875	-0.0924479	-0.155614	0.0251707	-0.213537	0.0306892	-0.690125	-0.818477	-0.855327	-0.839596	-0.690312	-0.765033		0.408432	-0.0606106		0.419024	-0.0518678		0.354187	0.115086		1.36717	0.122644	+	4.67642	1.78272	+	3.60751	1.11256
NUP107	Nuclear pore complex protein Nup107		4	9.3	0	7.2957	449490000	NaN	NaN	NaN	NaN	NaN	0.295605	NaN	NaN	NaN	NaN	NaN	NaN	NaN	NaN	NaN	NaN	NaN	NaN	NaN	NaN	-0.596078	-0.506701	NaN	NaN		0	NaN		-4.34e-08	0		-4.34e-08	0		0	NaN		0	NaN		-4.34e-08	0
CD81	CD81 antigen		1	31.8	0	168.51	61935000000	1.44985	1.51566	1.51288	1.28718	1.31528	1.40229	0.116232	0.00216244	-0.092171	-0.207844	-0.135348	-0.145829	0.732052	0.881743	0.79427	0.694925	0.62854	0.52667	2.13011	2.59355	2.57177	2.4401	2.49485	2.35324		1.58304	-0.157886		0.783445	-0.171748		0.885932	-0.185977		0.616184	-0.209075	+	4.41959	-1.04234	+	3.85072	0.690111
TPI1	Triosephosphate isomerase		17	82.3	0	271.68	207690000000	-0.196905	-0.248862	-0.246858	-0.24296	-0.229941	-0.255184	-0.358861	-0.351369	-0.317894	-0.30961	-0.253911	-0.286304	-0.267166	-0.264478	-0.210045	-0.191854	-0.305699	-0.334553	0.296193	0.326307	0.302875	0.263515	0.257493	0.338681		0.225886	-0.01182		1.02496	0.0594331		0.183865	-0.0301387		0.000890879	-0.000109822	+	4.5293	-0.528441		0.258273	0.016355
EIF3E	Eukaryotic translation initiation factor 3 subunit E		20	47	0	95.007	10638000000	0.69893	0.542605	0.631896	0.51924	0.77273	0.588229	0.684011	0.543793	0.397693	0.644595	0.545771	0.499476	0.27965	0.498149	0.508023	0.50284	0.332507	0.49057	-0.656695	-0.649706	-0.562517	-0.688218	-0.653514	-0.731015		0.00578759	0.00225633		0.180653	0.0214481		0.0376903	0.0133654		0.712972	-0.0469274	+	4.55548	1.25796		1.05534	0.19587
SEC61B	Protein transport protein Sec61 subunit beta		3	37.5	0	18.7	2181600000	-0.261275	-0.392175	-0.267427	-0.616769	-0.505574	-0.544898	-1.12029	-0.267548	-0.498953	-0.432318	NaN	NaN	-0.546435	-0.527824	-0.683067	-0.752413	NaN	NaN	-0.11724	-0.158977	-0.282614	-0.225076	-0.343678	-0.252776		1.13487	-0.248788		0	0.687976		0	-0.205978		0.182936	-0.0156753		0.693877	-0.0847367	+	1.89639	0.278816
ACTB	Actin, cytoplasmic 1;Actin, cytoplasmic 1, N-terminally processed		1	80.8	0	67.749	43701000000	0.11836	0.106214	0.054779	0.0697022	0.0697022	0.0970714	0.194844	0.00805652	0.168514	-0.00246912	0.0630887	-0.0434972	0.134089	-0.0698153	0.188528	0.14496	0.226632	0.158466	0.52306	0.474566	0.449324	0.453439	0.45628	0.637193		0.176607	-0.0142925		0.514068	-0.118097		0.33429	0.0924188		0.562581	0.0797351	+	4.19654	-0.365992		0.0370338	0.00885046
EIF4A1	Eukaryotic initiation factor 4A-I		14	64	0	289.55	81761000000	0.502534	0.301002	0.403268	0.411643	0.489954	0.551491	0.429107	0.389016	0.402395	0.459746	0.44742	0.426211	0.354114	0.45038	0.528171	0.413702	0.397584	0.40414	-0.587815	-0.518515	-0.577186	-0.587143	-0.550888	-0.555524		0.35043	0.0820947		1.1502	0.0376201		0.267012	-0.0390794		0.0369454	-0.00379421	+	3.99925	0.963216		0.211463	-0.0419535
RPS20	40S ribosomal protein S20		4	31.1	0	10.556	6716700000	0.247685	0.175301	0.183963	0.0844725	0.0597706	0.111966	0.245374	0.259423	0.279174	0.158596	0.223175	0.130535	0.0727232	-0.151875	0.013498	0.0635029	-0.0471595	0.00115371	0.0619835	0.0378742	0.0654344	0.210513	-0.0217165	0.00619029		1.32609	-0.116913		0.965447	-0.090555		0.262465	0.0277169		0.509837	-0.0891216		0.773329	0.0977088		1.4657	0.224201
PRPS1	Ribose-phosphate pyrophosphokinase 1		2	35.5	0	25.585	1550400000	-0.0542725	NaN	0.199751	0.00273846	NaN	0.173383	-0.778061	0.323774	0.584866	0.266996	0.868608	NaN	0.409907	NaN	0.450169	0.151989	0.139208	NaN	0.401303	0.66512	0.341075	0.332393	0.206643	0.700706		0.110259	0.0153217		0.712074	0.794946		0	-0.257918		0.016181	-0.00997847	+	0.9367	-0.373457		0.96336	-0.357299
CDC42	Cell division control protein 42 homolog		7	42.4	0	29.773	5876000000	-0.203153	-0.226713	-0.138362	-0.339363	-0.498525	-0.316816	0.0961269	0.201759	-0.0555314	-0.16025	-0.166422	-0.22901	0.108625	-0.214843	-0.117647	-0.145015	-0.200001	-0.161718	0.302524	0.274649	0.231187	0.368489	0.157949	0.166458		1.40316	-0.195492		1.37522	-0.266012		0.435721	-0.0942897		0.467423	-0.0824645	+	3.24049	-0.480851		0.505221	-0.114788
DSTN	Destrin		11	70.3	0	39.448	4923600000	-0.506332	-0.454664	-0.526452	-0.533577	-0.522592	-0.450853	-0.0958204	-0.36965	0.183455	-0.112101	0.0289935	-0.0513244	-0.0807286	-0.295624	-0.366559	-0.368849	-0.142162	-0.317067	0.102994	0.063779	0.122474	0.190804	0.112366	-0.00739111		0.0493426	-0.00652446		0.0883433	0.0491949		0.0700325	-0.0283889		0.286164	-0.0563627	+	3.8964	-0.621502		1.31267	-0.248179
RAB8A	Ras-related protein Rab-8A		5	30.4	0	20.308	492580000	-0.0654759	0.00963388	-0.0430363	-0.696003	-0.567575	NaN	NaN	NaN	NaN	NaN	-0.576562	NaN	-0.0250302	-0.392289	-0.0312088	NaN	NaN	0.218471	0.435309	NaN	0.242694	-0.0196676	-0.203419	NaN		1.5515	-0.603868		0	NaN		0	0.24968		0	-0.446113		0.599781	-0.144473		0.39958	0.11655
SRP54	Signal recognition particle 54 kDa protein		12	28.4	0	40.336	2276800000	-0.00127013	NaN	-0.131519	NaN	-0.0195067	-0.150641	NaN	-0.129813	NaN	0.192068	NaN	NaN	-0.299898	-0.333443	NaN	-0.14299	NaN	0.208018	-0.522447	0.430071	-0.68973	-0.706347	-0.779026	-0.497771		0	-0.0191225		0	NaN		0	0.156907		0.293543	-0.277746		0.196128	0.255607		1.18564	0.250276
RAB10	Ras-related protein Rab-10		5	27.5	0	11.641	2771800000	0.298424	0.572793	-0.154811	0.0784732	0.384271	0.309293	0.111833	0.10608	-0.157271	-0.025133	0.405666	0.379399	0.033793	0.351741	0.236707	0.143394	0.401412	-0.331536	0.0610158	-0.103379	-0.142736	0.170694	0.107688	0.121148		0.0262756	0.0185438		0.445089	0.233096		0.226588	-0.136324		0.515071	0.121757		0.491761	0.263942		0.0463621	0.031388
UBE2M	NEDD8-conjugating enzyme Ubc12		4	23.5	0	14.808	2154400000	NaN	-0.37118	0.256045	-0.0179867	-0.306127	-0.0390139	NaN	0.987903	-0.391456	NaN	NaN	0.617675	-0.470989	NaN	NaN	NaN	-1.48265	-0.600512	1.04194	1.13567	-0.454644	0.978708	0.909811	0.755315		0.195079	-0.115003		0	1.00913		0	NaN		0.248985	0.349113		0.353145	-0.610811		0	0.413421
UBE2K	Ubiquitin-conjugating enzyme E2 K		3	18.5	0	9.1043	328290000	NaN	NaN	-0.0617518	NaN	NaN	NaN	0.0226164	NaN	NaN	-0.0176215	NaN	-0.259357	0.227371	NaN	NaN	NaN	-0.040675	NaN	NaN	NaN	NaN	0.0333701	NaN	0.0976109		0	NaN		0	-0.0402378		0	NaN		0	0.0642408		0	-0.0951219		0	-0.289123
UBE2N;UBE2NL	Ubiquitin-conjugating enzyme E2 N;Putative ubiquitin-conjugating enzyme E2 N-like		3	18.4	0	6.3957	781210000	0.136716	0.185359	0.189919	0.31742	0.222681	0.0899048	0.435415	0.376401	NaN	0.632919	1.04586	NaN	0.724301	NaN	0.0869197	NaN	-0.586276	0.179511	0.162597	0.189666	0.0854246	NaN	0.183963	NaN		0.170459	0.0393369		0.49844	0.433483		0	0.0925914		0.173487	0.0357343		0.290816	0.0331195		0.400879	-0.234945
RAB14	Ras-related protein Rab-14		7	46.5	0	29.304	1614200000	NaN	0.1141	0.137766	-0.0198869	0.373732	-0.11627	-0.0443153	0.0817487	0.350724	0.436588	-0.0545871	-0.0195067	NaN	0.581014	NaN	NaN	-0.010454	-0.0969617	-0.349346	-0.175648	-0.173173	-0.271618	-0.221405	-0.300466		0.00302224	0.00279784		0.0104696	-0.00855414		0	-0.591468		0.684186	-0.0835926	+	2.35496	0.332746		0	-0.455081
ACTR3	Actin-related protein 3		7	34.7	0	53.744	6724400000	0.0425042	-0.113739	-0.187658	-0.30244	-0.102558	-0.0188927	-0.0426499	-0.0115298	0.0694272	-0.239226	-0.211966	-0.179498	-0.0407788	-0.000230819	-0.421593	-0.144106	-0.0426797	-0.193387	-0.0936635	0.223546	0.0603242	0.0517201	0.0238941	-0.0950805		0.12376	-0.0549994		2.21724	-0.215312		0.0900732	0.0274765		0.749983	-0.166813		1.05933	-0.198161		0.170697	0.0679033
ACTR2	Actin-related protein 2		7	23.4	0	9.1306	5774200000	2.00597	NaN	NaN	NaN	0.574538	1.23567	NaN	-0.137156	NaN	NaN	NaN	NaN	NaN	NaN	NaN	NaN	NaN	NaN	NaN	-0.134667	0.0302654	NaN	-0.00164561	-0.348684		0	NaN		0	NaN		-4.34e-08	0		0	-0.031911		0	2.05818		0	NaN
ACTR1A	Alpha-centractin		2	9	0	12.471	4212200000	NaN	NaN	NaN	NaN	NaN	NaN	NaN	NaN	NaN	NaN	NaN	NaN	NaN	NaN	NaN	NaN	NaN	NaN	NaN	-1.2108	-1.44662	NaN	-0.37692	NaN		-4.34e-08	0		-4.34e-08	0		-4.34e-08	0		0	1.0697		0	NaN		-4.34e-08	0
ARF3	ADP-ribosylation factor 3	+	1	63.5	0	4.73	8295400000	NaN	-1.48128	NaN	NaN	NaN	NaN	NaN	-2.08339	-2.82501	NaN	NaN	NaN	NaN	NaN	-2.82266	-1.4269	-0.271879	0.0610158	NaN	NaN	-0.16004	-1.69171	NaN	NaN		0	NaN		0	NaN		0	2.88367		0	NaN		0	-0.555409		0	1.34137
ABCE1	ATP-binding cassette sub-family E member 1		14	34.2	0	67.959	3874500000	0.0294175	-0.14733	0.0418037	0.380619	0.209765	-0.153029	-0.0096841	0.024036	-0.0687103	-0.0263079	NaN	-0.0729835	-0.500034	-0.369073	NaN	-0.0995872	NaN	-0.140142	-0.56734	-0.628609	-0.923523	-0.943028	-0.721206	-0.546351		0.348349	0.171154		0.468747	-0.0104485		0	0.400447		0.818395	0.220088	+	2.61117	0.80635	+	1.66546	0.409184
RAP1B;RAP1A	Ras-related protein Rap-1b;Ras-related protein Rap-1b-like protein;Ras-related protein Rap-1A		2	37	0	23.564	4609600000	-0.182852	-0.336664	-0.375029	-0.341866	-0.408244	-0.17909	-0.47903	-0.247012	-0.18043	-0.244189	-0.268869	-0.356569	-0.213571	-0.343	-0.365481	-0.427479	-0.127573	-0.313997	0.133827	0.0802483	0.146655	0.0663992	-0.0984747	0.0676387		0.0344595	-0.0115517		0.0325755	0.0122815		0.0454585	0.0176677		0.250183	-0.0634374	+	2.46657	-0.395949		0.0413868	0.00916911
RAP2B	Ras-related protein Rap-2b		2	37.2	0	6.4224	2005600000	NaN	NaN	NaN	NaN	NaN	NaN	0.963326	1.097	0.865919	0.904272	1.15037	NaN	0.493852	0.455123	0.735262	0.641269	0.843743	0.86758	NaN	NaN	NaN	NaN	NaN	NaN		-4.34e-08	0		0.0142206	-0.0028466		0.937946	0.222785		-4.34e-08	0		-4.34e-08	0		0	NaN
RPS3A	40S ribosomal protein S3a		17	56.8	0	115.7	20948000000	-0.136426	-0.113754	-0.0694216	-0.0877947	0.0946415	-0.0214236	0.131589	0.116365	0.242938	0.0931545	0.0391384	0.0522768	0.0965318	0.014641	-0.0551715	-0.0983202	0.0130691	0.00776951	0.102591	0.0364681	0.165687	0.101112	0.113834	0.147567		0.705525	0.101675		0.809996	-0.102107		0.205061	-0.0444943		0.197324	0.0202416	+	2.10171	-0.207623		1.22402	-0.125201
PSME3	Proteasome activator complex subunit 3		9	38.2	0	15.97	3045500000	0.452595	-0.0492778	0.234869	0.192194	0.258459	0.46634	-0.0425311	0.0193461	0.195852	0.179893	-0.13649	0.441483	-0.0431553	0.0287106	0.307312	0.388686	0.141171	0.346645	-0.286375	-0.543068	-0.567618	-0.538933	-0.0417884	-0.511649		0.184607	0.0929354		0.294363	0.104073		0.60588	0.194545		0.69499	0.269935	+	2.19745	0.762602		0.253305	0.115107
RPL15	60S ribosomal protein L15;Ribosomal protein L15		18	52.5	0	147.52	253720000000	-0.147602	-0.181313	-0.18097	-0.214173	-0.196856	-0.252398	-0.126659	-0.018162	-0.0455356	-0.000404044	-0.0894055	-0.134683	-0.184917	-0.202306	-0.142672	-0.150113	-0.139983	-0.116802	0.20201	0.172487	0.207768	0.200128	0.190299	0.259182		0.985507	-0.0511809		0.0534514	-0.0113785		1.189	0.0409992		0.399172	0.0237027	+	4.7089	-0.363422		0.115758	0.0066702
RHOA;RHOC	Transforming protein RhoA;Rho-related GTP-binding protein RhoC		5	51.3	0	38.021	9033500000	-0.0725889	-0.210463	-0.25202	-0.0871662	0.100305	-0.0399183	-0.286181	-0.0602017	-0.0975173	0.0413831	0.198368	0.0330882	-0.0187172	0.0100636	0.0560286	-0.0295586	0.127237	-0.0489047	0.0556121	0.164014	0.0775164	0.0650208	0.280719	0.268794		0.656362	0.169431		1.27023	0.238913		0.00223036	0.000466282		0.357103	0.0995245	+	1.96129	-0.280541		1.53302	-0.194149
HSPE1	10 kDa heat shock protein, mitochondrial		0	52	0	14.584	805760000	NaN	NaN	-0.567789	-0.31011	-0.764739	-0.365909	NaN	NaN	NaN	NaN	NaN	NaN	NaN	-1.37008	NaN	NaN	NaN	NaN	NaN	-0.0509657	NaN	NaN	NaN	NaN		0	0.20188		-4.34e-08	0		0	NaN		0	NaN		0	-0.516823		0	0.80229
VBP1	Prefoldin subunit 3		6	38.1	0	37.198	1831600000	NaN	0.42094	NaN	NaN	NaN	0.342441	0.109294	NaN	-0.0256763	NaN	NaN	0.540226	NaN	NaN	NaN	NaN	NaN	NaN	-0.276363	-0.334771	-0.458446	0.269991	0.171591	-0.0618422		0	NaN		0	0.565902		-4.34e-08	0		0.147624	0.118871		0	0.595349		0	NaN
RPL37	60S ribosomal protein L37;Ribosomal protein L37		6	29.9	0	4.4415	8286400000	0.0832474	-0.0434824	-0.08111	-0.134604	-0.0442557	-0.0563112	0.151859	0.239765	0.0413831	0.201634	0.135798	0.145873	0.00115371	-0.0147473	0.139076	0.193078	0.0514416	0.179511	0.326537	0.259905	0.37529	0.425137	0.281787	0.265797		0.310139	-0.0646085		0.0897251	0.016766		0.776429	0.0995159		0.344289	-0.0620701	+	2.20509	-0.367226		0.328269	-0.0556093
HNRNPK	Heterogeneous nuclear ribonucleoprotein K		20	53.3	0	164.57	32717000000	-0.176577	-0.231735	-0.129118	-0.184425	-0.152725	-0.151955	-0.102047	-0.0826675	0.0182068	-0.0648722	-0.178698	0.0513026	-0.0768432	-0.171303	-0.0300741	-0.0899274	-0.218095	-0.168398	-0.0732718	-0.0645101	-0.139983	-0.0675004	-0.0927709	-0.0631077		0.178953	0.0161087		0.0642412	-0.0085866		0.658597	-0.0660666		0.312456	0.0142809		1.07824	-0.088479		0.780677	-0.0864032
YWHAG	14-3-3 protein gamma;14-3-3 protein gamma, N-terminally processed		9	57.1	0	151.6	28942000000	0.185232	0.110363	0.156008	0.131985	-0.00128459	0.153676	0.0688771	0.0844725	0.0858326	0.0719	0.038998	0.0350608	0.125122	0.00403388	0.067501	0.0596321	0.18574	0.114367	-0.151827	-0.284599	-0.0970852	-0.205231	-0.0833399	-0.238289		0.658369	-0.0557426		0.675476	-0.0310745		0.278794	0.0543606		0.280961	0.0378195	+	2.3876	0.346173		0.966085	0.0849822
RPS7	40S ribosomal protein S7		5	31.4	0	9.4043	1183700000	-0.161411	-0.425501	-0.305967	-0.288311	-0.385903	-0.434091	NaN	-0.106281	NaN	NaN	-0.613608	-0.542942	-0.423933	NaN	-0.428915	NaN	NaN	-0.669809	-0.728455	NaN	-0.631846	-0.964911	-0.579534	NaN		0.486327	-0.0718086		0	-0.507328		0	-0.240893		0	0.0523125	+	1.29329	0.500752		0.548933	0.128798
PPP1CB	Serine/threonine-protein phosphatase PP1-beta catalytic subunit;Serine/threonine-protein phosphatase		3	32.7	0	52.64	6524600000	-0.328199	-0.183196	-0.305824	-0.128976	-0.247902	-0.370825	0.00460933	0.0446039	0.0119249	-0.0744107	0.0160683	0.0533895	0.1333	-0.425889	0.124461	-0.0717851	-0.0155346	-0.151442	0.32458	0.210888	0.268913	0.313594	0.299479	0.433173		0.0877746	0.0231716		0.227148	-0.0220303		0.0344122	-0.0235447		1.03501	0.0879458	+	3.24068	-0.536871		0.495988	-0.216364
NCS1	Neuronal calcium sensor 1	+	9	57.4	0	28.654	1867700000	-0.614293	-0.630394	-0.617322	0.480058	0.23585	0.734829	-0.369408	-0.573746	-0.120953	0.241718	0.114634	NaN	0.836974	0.147176	-0.121173	NaN	NaN	NaN	NaN	-0.233803	0.182057	0.319155	NaN	0.34426	+	1.80204	1.10425		1.42249	0.649753		0	NaN		0	0.025105	+	1.88691	-0.709806	+	1.47553	-0.908329
PSMC1	26S protease regulatory subunit 4	+	31	67.7	0	283.19	97757000000	-1.23654	-1.18478	-1.16981	0.461529	0.373621	0.465504	-0.994816	-1.07516	-1.00347	0.11703	0.216113	0.195474	0.243669	0.164529	0.189793	1.5147	1.35101	1.23873	1.32193	-0.00904517	0.0628125	-0.025691	1.45933	1.70907	+	3.21264	1.6306	+	2.73137	1.20068	+	2.5154	1.16881	+	2.15485	1.48742	+	5.4317	-1.2064	+	5.84482	-1.39637
PSMC5	26S protease regulatory subunit 8		16	49.5	0	53.981	7308100000	-0.675282	-0.754699	-0.49285	0.223175	0.253505	0.311736	-0.398703	-0.295925	-0.213889	0.228357	-0.140666	0.147697	0.119821	0.0862402	0.439464	0.823423	1.22602	0.665938	0.0694272	-0.277831	0.0448837	-0.0160014	0.261591	0.00891703	+	2.37551	0.903749		0.967012	0.381302		0.919697	0.689951		0.767191	0.196295	+	1.94483	-0.55796	+	2.47969	-0.856118
RPS8	40S ribosomal protein S8		19	61.1	0	211.37	81346000000	0.0809305	0.041243	0.0982848	-0.00365461	-0.0583978	-0.0769041	0.319734	0.388134	0.331476	0.406645	0.391438	0.252052	0.260989	0.219587	0.250234	0.162597	0.243181	0.332622	0.290189	0.287236	0.314058	0.36614	0.255561	0.294665		1.29566	-0.119805		0.0236038	0.00359724		0.0148369	0.00253018		0.685277	-0.04234	+	3.01475	-0.248992		2.9029	-0.170117
RPS15A	40S ribosomal protein S15a		4	45.4	0	24.654	10997000000	0.243303	0.21176	0.166844	0.19333	0.16092	0.265197	0.281075	0.191436	0.156008	0.226509	0.159242	0.280006	0.0931545	-0.0234164	0.147046	-0.0238417	0.068602	0.0867838	-0.0240764	0.0201999	0.0775164	-0.0657175	-0.0581875	-0.0869823		0.0051079	-0.000820011		0.0728315	0.0124122		0.158933	-0.0284134		0.710145	-0.0670817	+	1.8526	0.196636		1.15505	0.135041
RPS16;ZNF90	40S ribosomal protein S16		11	56.2	0	28.486	15932000000	0.0381553	-0.0286754	-0.0039005	-0.103751	-0.0328461	-0.0946491	0.0932897	0.171079	0.240742	-0.00082257	-0.0335105	0.0227584	-0.0239883	-0.10149	-0.0693913	-0.109188	-0.13424	-0.0750944	0.330099	0.312549	0.312549	0.242572	0.195726	0.336626		0.724672	-0.078942		1.31687	-0.172228		0.658784	-0.0412173		0.00875344	-0.0017396	+	3.15543	-0.287364		1.05477	0.0668163
YWHAE	14-3-3 protein epsilon		15	65.9	0	149.02	96385000000	0.156785	0.252294	0.259303	0.271426	0.225769	0.232538	0.101112	0.124857	0.170951	0.116365	0.152638	0.169027	0.0723116	0.0469799	0.0892269	0.0719	0.109427	0.0799754	-0.440518	-0.445775	-0.484166	-0.452254	-0.46168	-0.431151		0.1509	0.02045		0.597797	0.0137031		0.286285	0.0175948		1.00655	0.0162821	+	4.38571	0.683526		1.91378	0.153288
RPS14	40S ribosomal protein S14		8	40.4	0	37.171	10237000000	0.0187766	0.122341	-0.0765542	0.0946415	-0.124126	-0.155952	0.510557	0.313826	0.341758	0.343237	0.392647	0.177599	-0.0664576	0.0687396	0.0578315	-0.0910027	0.294077	0.187641	-0.0067532	0.00374607	0.00518438	0.143916	-0.0894055	0.0304067		0.332482	-0.0833333		0.387069	-0.0842193		0.569813	0.110201		0.829798	-0.0728661		0.14827	-0.0294275		0.00676628	0.00148347
RPS23	40S ribosomal protein S23		10	60.1	0	47.184	30385000000	-0.0056665	-0.06679	-0.0512197	-0.147666	-0.116067	-0.168269	0.249749	0.138421	0.106884	0.101247	0.132116	0.15782	-0.00167453	0.0628125	0.0139266	-0.0604124	0.0922074	0.066537	0.266517	0.297485	0.373175	0.29066	0.265317	0.270828		1.1832	-0.102775		0.208788	-0.0346239		0.0755284	0.00775581		0.707391	-0.0528861	+	3.44741	-0.361665		1.16608	-0.0662469
RPS18	40S ribosomal protein S18		6	41.4	0	10.083	586850000	NaN	NaN	NaN	-0.689869	-1.88582	NaN	NaN	NaN	NaN	NaN	NaN	NaN	NaN	NaN	NaN	NaN	NaN	NaN	-0.796385	-0.787617	NaN	NaN	NaN	-1.28009		0	NaN		-4.34e-08	0		-4.34e-08	0		0	-0.00876796		0	NaN		-4.34e-08	0
RPS29	40S ribosomal protein S29		3	46.4	0	4.3748	629720000	NaN	NaN	NaN	-0.0918788	-0.383266	NaN	NaN	NaN	NaN	NaN	-0.0625803	NaN	NaN	NaN	NaN	NaN	NaN	NaN	0.187134	NaN	0.464668	0.179638	0.344601	NaN		0	NaN		0	NaN		-4.34e-08	0		0	-0.120067		0	NaN		-4.34e-08	0
RPS13	40S ribosomal protein S13		5	29.8	0	17.36	2727900000	0.0356239	0.0583859	0.415542	0.0691523	-0.254066	0.0289935	-0.231667	-0.458545	0.10675	-0.191524	-0.237711	-0.810814	-0.346683	-0.199786	0.336055	-0.702327	-0.386864	-0.1666	-0.181886	-0.533493	0.032524	-0.0739854	-0.0477559	0.0207689		0.640636	-0.221824		0.222795	-0.218863		1.20662	-0.348459		0.363312	0.122027		0.783508	0.361502		0.424726	0.239989
RPS11	40S ribosomal protein S11		15	64.6	0	43.982	22743000000	0.344488	0.247198	0.265557	0.311503	0.109561	0.316262	0.233888	0.220701	0.335483	0.133564	0.0050406	0.0601858	0.0496307	0.0110662	0.0989585	0.146134	0.181166	0.057277	-0.196442	-0.213002	-0.136077	-0.290392	-0.301764	-0.234448		0.268016	-0.0399724		1.20985	-0.197094		0.455214	0.0749739		0.158811	-0.031061	+	3.12934	0.498905	+	2.3922	0.232529
SNRPD2	Small nuclear ribonucleoprotein Sm D2		6	53.4	0	11.571	1535900000	0.206518	-0.36149	-0.161895	0.0344974	0.187261	-0.0731655	0.146264	0.470823	0.378401	0.689657	0.863066	0.163499	0.361768	0.143132	0.232047	-0.378044	-0.460826	0.607674	0.786262	0.451646	0.459117	0.352533	0.446362	0.296193		0.269082	0.155153		0.388547	0.240245		0.341666	-0.322715		0.260789	0.0885071	+	1.4413	-0.526721		0.92155	-0.351272
SNRPD3	Small nuclear ribonucleoprotein Sm D3		3	21.7	0	5.1736	1412700000	NaN	-0.568987	-0.638434	-0.553511	NaN	-0.854023	0.0799754	NaN	NaN	NaN	0.044464	NaN	-0.0671527	NaN	NaN	-0.263387	NaN	-0.202207	-0.0241645	NaN	0.0280033	0.0433446	-0.0510254	0.370053		0	-0.215589		0	NaN		0	-0.196234		0.186357	0.12384	+	2.51159	-0.639384		0	-0.536558
ARF6	ADP-ribosylation factor 6	+	6	60	0	63.334	14247000000	-0.489625	-0.434598	-0.498892	1.36771	0.971074	1.03998	-0.467932	-0.486812	-0.470129	0.707348	0.776188	0.872868	0.391218	0.176323	0.0588013	1.64897	1.30958	1.52331	1.09085	-0.124896	-0.20578	-0.0642386	1.04215	1.20646	+	2.15898	1.60063	+	2.83172	1.26043	+	2.25162	1.28517	+	3.7854	1.24479	+	2.77377	-0.342734	+	2.6298	-0.683152
RPL7A	60S ribosomal protein L7a		15	44.4	0	62.525	16102000000	-0.123622	-0.290868	-0.13481	-0.245044	-0.211448	-0.264304	0.190678	0.142087	0.0855606	0.0308304	0.0497701	-0.0287048	-0.149697	-0.0734236	-0.0514141	-0.0660799	-0.0596754	-0.164593	0.183963	0.219339	0.179129	0.223793	0.149129	0.264717		0.30904	-0.0571654		1.5934	-0.122143		0.0289922	-0.00527145		0.112512	-0.00815071	+	2.65827	-0.39052		0.674564	-0.0915887
ETF1	Eukaryotic peptide chain release factor subunit 1		13	30.2	0	64.235	8128000000	0.155361	0.1995	0.154324	0.424062	-0.0940484	0.192699	0.189666	0.379954	0.108892	0.287472	0.0513026	0.458592	0.353097	0.432746	0.262433	0.441483	-0.124236	0.164143	-0.147538	-0.24156	-0.0916789	-0.0706635	-0.221051	-0.205713		0.00856844	0.00450949		0.0655571	0.0396181		0.368289	-0.188962		0.275718	-0.0567998	+	2.25964	0.304362		1.60224	-0.179697
RPS4X	40S ribosomal protein S4, X isoform		22	66.9	0	107.1	34641000000	0.00230651	0.0318186	0.0963968	-0.0102942	-0.029323	0.0126402	0.227248	0.269273	0.179256	0.205393	0.166844	0.0878702	0.0289935	-0.00352444	0.0352017	-0.0286165	0.0681893	0.128294	0.0945064	0.173	0.126841	0.15069	0.0900404	0.145351		0.887671	-0.0524997		0.982196	-0.0718901		0.278103	0.0357319		0.703043	-0.0402106		1.58875	-0.106669		0.314581	0.0232838
PPP2CA;PPP2CB	Serine/threonine-protein phosphatase 2A catalytic subunit alpha isoform;Serine/threonine-protein phosphatase 2A catalytic subunit beta isoform		6	30.7	0	31.02	1931500000	-0.0455207	NaN	-0.165677	NaN	NaN	-0.0280426	NaN	-0.124959	-0.198427	NaN	NaN	NaN	NaN	NaN	-0.162234	NaN	NaN	NaN	-0.099479	0.0784732	0.470927	0.868292	-0.270608	-0.231379		0	0.137634		0	NaN		0	NaN		0.889856	-0.673053	+	0.831376	-0.578163		0	0.0566354
RPS6	40S ribosomal protein S6		25	61.4	0	147.58	114420000000	0.0380147	-0.0411351	0.0742315	0.0160683	-0.0729076	-0.0173587	0.440421	0.331476	0.429214	0.384271	0.253142	0.299596	0.186501	0.107152	0.148739	0.208892	0.214622	0.171079	0.275365	0.350045	0.393746	0.382833	0.262313	0.336055		0.806948	-0.0484364		1.25186	-0.0880338		0.666327	0.0507337		1.11178	-0.0842971	+	3.18826	-0.351837		1.40481	-0.12376
HIST1H4A	Histone H4		5	50.5	0	19.035	7241800000	0.0278618	-0.375908	-0.31475	-0.310933	-0.472029	-0.285337	-0.0929248	-1.29871	-0.72211	-0.664334	-0.853579	-0.780438	-1.29495	-1.38248	-1.3652	-1.28469	-1.3419	-1.87165	-0.557603	-0.331318	0.103531	-0.0815985	-1.11569	-0.593463		0.471704	-0.135167		0.0688848	-0.0615359		0.316621	-0.151871		0.802405	-0.652457		0.264303	-0.117804	+	3.03057	1.12661
RAB1A	Ras-related protein Rab-1A		3	45.9	0	27.031	14382000000	-0.140428	-0.00233905	0.00647761	-0.164141	-0.00475429	-0.0535536	-0.0121989	0.067501	0.125254	-0.0510105	-0.157673	0.000144286	-0.0638162	-0.162912	0.0899048	-0.0502037	-0.273082	-0.0698153	-0.11702	-0.0442259	-0.0384508	-0.0623995	-0.118335	-0.0494868		0.638555	-0.0287197		0.861213	-0.129698		0.621055	-0.0854255		0.587312	-0.0465888		0.0202803	0.00292895		0.000663161	0.000178194
RPL23	60S ribosomal protein L23		6	49.3	0	61.61	26786000000	0.235482	0.129877	0.292075	0.276675	-0.00452274	0.282855	0.241962	0.412944	0.185486	0.106616	0.0413831	0.119423	-0.0156366	-0.179989	-0.0849304	0.0575542	0.0705267	0.0740944	-0.0427094	-0.0622489	-0.157995	-0.270521	-0.00595617	-0.133322		0.236409	-0.034142		0.757221	-0.19099		1.05518	0.16091		0.874762	0.102926	+	2.12257	0.382733	+	2.01373	0.312663
RPS25	40S ribosomal protein S25		6	34.4	0	13.172	7729700000	-0.185573	-0.243745	-0.195699	-0.20563	-0.315756	-0.315864	-0.162767	0.00834347	0.0100636	-0.123261	-0.108099	-0.140396	-0.0297206	-0.257976	-0.217004	-0.136839	-0.189088	-0.106778	0.143002	0.174534	0.147567	0.271545	0.131063	0.203765		0.872386	-0.0707442		0.488981	-0.0757986		0.123084	0.0239991		0.897699	-0.0386058	+	3.20616	-0.406221		0.214903	-0.040105
RPS26;RPS26P11	40S ribosomal protein S26;Putative 40S ribosomal protein S26-like 1		3	31.3	0	13.601	28419000000	0.0209111	0.0140695	0.0236102	-0.0343376	-0.126092	-0.13462	0.35558	0.341075	0.361544	0.3667	0.406863	0.282143	0.0676387	0.136848	0.0926134	0.164658	0.573859	0.316725	0.35061	0.365692	0.308244	0.454281	0.327572	0.275365		1.18384	-0.11788		0.0060689	-0.000830928		0.900828	0.252714		0.355001	-0.0582235	+	2.95405	-0.356542		1.75257	-0.0795029
RPS28	40S ribosomal protein S28		2	30.4	0	6.7526	3546700000	-0.706724	-0.915582	-0.478025	-0.648123	NaN	-0.64991	-2.52558	-0.444302	-0.212685	-0.625267	-0.441341	-0.755259	-0.175501	-0.324166	-0.658515	-0.322054	-0.454348	-0.195418	-3.0037	-0.383304	-1.74584	NaN	NaN	0.0579701		0.149247	-0.0566424		0.220057	0.453567		0.104556	0.0621207		0	-2.62039		0.264856	0.364462		0.757126	-0.314049
RPL39P5;RPL39	Putative 60S ribosomal protein L39-like 5;60S ribosomal protein L39		3	23.5	0	5.7045	3171400000	-0.285249	NaN	NaN	NaN	NaN	NaN	0.732399	0.807602	NaN	0.814099	NaN	NaN	NaN	0.926531	1.06088	0.760178	0.379954	0.573859	NaN	NaN	NaN	NaN	NaN	NaN		0	NaN		0	0.0816998		1.436	-0.516798		-4.34e-08	0		0	NaN		0	-1.27895
RPL31	60S ribosomal protein L31		8	52.8	0	45.53	70032000000	-0.177849	-0.290004	-0.223071	-0.28351	-0.321694	-0.312348	0.0106367	0.116365	0.015783	0.0346383	0.0494913	-0.11879	-0.0115007	-0.0378138	-0.0316512	-0.00994548	-0.0631378	0.0391384	0.239276	0.242694	0.251931	0.256528	0.197488	0.272501		1.10796	-0.0755426		0.485734	-0.0591482		0.194505	0.0156736		0.240685	-0.0139626	+	3.89758	-0.480692	+	2.4276	-0.203319
RPL10A	60S ribosomal protein L10a		8	39.2	0	25.106	8156500000	-0.15157	-0.233261	-0.0574067	-0.452175	-0.32182	-0.248468	0.0603242	0.184471	0.021764	0.0137839	-0.0571065	-0.0611496	-0.116958	0.0184917	-0.0589689	0.0738203	-0.0680296	-0.136807	0.0561673	0.0210533	0.229465	0.160017	0.139862	0.307662		1.05906	-0.193408		0.757269	-0.123677		0.0307022	0.00880628		0.158124	0.0310522	+	1.63175	-0.284258		0.671096	-0.0949342
RPL11	60S ribosomal protein L11		6	32.6	0	52.394	16050000000	0.34551	0.205017	0.359746	0.249749	0.218347	0.199374	0.327802	0.348119	0.393416	0.190425	0.063641	0.157303	0.062398	0.0377336	0.194591	0.160017	0.0894982	0.0344974	-0.0912639	-0.119636	-0.180217	-0.170605	-0.223475	-0.19108		0.599616	-0.0809343		1.43398	-0.219323		0.0140304	-0.00357026		0.198556	-0.0117867	+	3.01942	0.460244		1.38081	0.205183
RPL8	60S ribosomal protein L8		14	49	0	129.6	23990000000	-0.223761	-0.0933403	-0.0639068	-0.175485	-0.29814	-0.167799	-0.00202118	0.0546401	0.0651587	0.0326651	-0.102125	0	-0.0886076	-0.0363927	-0.136157	-0.208128	-0.165192	0.015783	0.216982	0.314058	0.340505	0.394843	0.179384	0.253142		0.444551	-0.0868051		0.424667	-0.0624124		0.118927	-0.0321265		1.70694	-0.1333	+	3.02431	-0.476805		0.282642	-0.0399505
PPIA	Peptidyl-prolyl cis-trans isomerase A;Peptidyl-prolyl cis-trans isomerase A, N-terminally processed;Peptidyl-prolyl cis-trans isomerase		4	71.5	0	248.51	108310000000	-0.0833705	-0.154907	-0.137029	-0.112537	-0.158558	-0.183998	-0.289739	-0.140794	-0.120843	-0.143086	-0.132736	-0.108861	-0.149393	-0.156515	-0.150609	-0.129182	-0.141176	-0.123513	0.381394	0.31313	0.341644	0.287118	0.267476	0.28948		0.773049	-0.0265956		0.459779	0.0555643		1.59085	0.0208822		0.00889668	-0.0011804	+	4.10009	-0.439066		0.555158	0.0270698
PPIA	Peptidyl-prolyl cis-trans isomerase A;Peptidyl-prolyl cis-trans isomerase A, N-terminally processed		1	78.1	0.0015625	2.2173	232860000	NaN	NaN	NaN	-0.394183	NaN	NaN	NaN	-0.485903	-0.377538	NaN	NaN	NaN	NaN	-0.30059	NaN	NaN	NaN	NaN	-0.20151	NaN	0.221692	NaN	NaN	NaN		0	NaN		0	NaN		0	NaN		0	NaN		0	NaN		0	NaN
RPS27A;UBB;UBC;UBA52	Ubiquitin-40S ribosomal protein S27a;Ubiquitin;40S ribosomal protein S27a;Ubiquitin-60S ribosomal protein L40;Ubiquitin;60S ribosomal protein L40;Polyubiquitin-B;Ubiquitin;Polyubiquitin-C;Ubiquitin		10	61.5	0	71.927	32811000000	0.95732	1.0635	0.901572	0.709202	0.653335	0.728225	0.304161	0.169412	0.206768	-0.049651	0.0110662	0.417704	0.486869	0.442121	0.493647	0.547154	0.344033	0.434134	0.315798	0.470927	0.270828	0.487075	0.459432	0.274053		1.23591	-0.277211		0.217586	-0.100407		0.246811	-0.0324386		0.167417	-0.0598491	+	2.58879	0.564522	+	3.24426	0.499919
TRA2B	Transformer-2 protein homolog beta		5	18.1	0	9.4847	406130000	NaN	-0.790584	-0.599331	-0.508732	-0.497201	-0.434305	NaN	NaN	NaN	NaN	NaN	NaN	NaN	NaN	NaN	NaN	NaN	NaN	NaN	NaN	NaN	0.347212	-0.0714363	NaN		0.759934	0.229204		-4.34e-08	0		-4.34e-08	0		0	NaN		0	-1.04217		0	NaN
RAC1;RAC3	Ras-related C3 botulinum toxin substrate 1;Ras-related C3 botulinum toxin substrate 3		6	31.8	0	13.105	3390800000	-0.529177	-0.225194	-0.376564	-0.537424	-0.181689	-0.187625	-0.11926	-0.106902	-0.163155	-0.296456	0.157561	-0.327167	-0.193354	-0.178453	-0.066382	-0.25934	0.464459	-0.165321	0.525568	0.250113	0.246469	0.142871	0.225028	0.369606		0.477576	0.0747321		0.0573635	-0.0255821		0.238135	0.159329		0.650883	0.16025	+	2.47418	-0.590129		1.1257	-0.230915
AP2B1	AP-2 complex subunit beta		16	48	0	98.088	14790000000	0.509544	0.421372	0.320889	0.263035	0.608336	0.576087	0.375512	0.413486	0.72927	0.714399	0.309409	0.20201	0.288654	0.203765	0.31429	0.384713	0.386811	0.450697	-0.154988	-0.143261	-0.207578	-0.0895283	-0.158429	-0.169031		0.143667	0.0652177		0.134155	-0.0974831		1.50327	0.138504		0.129543	-0.0140269	+	3.03101	0.564057		1.09133	0.148365
GNAI1	Guanine nucleotide-binding protein G(i) subunit alpha-1	+	5	37.3	0	23.334	845920000	-0.749281	-0.749669	-0.792707	NaN	NaN	NaN	NaN	-0.150769	-0.276957	NaN	NaN	NaN	NaN	1.08875	NaN	NaN	NaN	NaN	NaN	NaN	NaN	NaN	NaN	1.85762		0	NaN		0	NaN		0	NaN		0	NaN		0	NaN		0	-1.85264
YWHAZ	14-3-3 protein zeta/delta		13	73.1	0	323.31	236790000000	0.0596321	0.0207689	-0.0257938	-0.0120825	0.0210533	-0.0210137	0.013498	0.057277	0.109294	0.0494913	0.0521377	0.0371714	0.0801119	0.0511633	0.0990932	0.0766959	0.0489337	0.0216219	-0.296084	-0.295128	-0.319748	-0.273552	-0.242328	-0.354796		0.332907	-0.0222167		0.151808	-0.0137561		0.418582	-0.0277057		0.0108144	-0.00159355	+	3.44131	0.314345		0.96783	-0.058587
PPP2R2A	Serine/threonine-protein phosphatase 2A 55 kDa regulatory subunit B alpha isoform		3	14.8	0	16.091	1256300000	0.370834	NaN	1.11929	NaN	NaN	-0.156691	NaN	NaN	0.158079	NaN	NaN	NaN	0.19711	NaN	NaN	NaN	NaN	NaN	-0.2932	-0.0766454	-0.226831	0.561204	-0.345125	-0.906791		0	-1.27598		0	NaN		0	NaN		0.521771	-0.600948		0.671117	0.659153		0	0.547951
DYNLL1;DYNLL2	Dynein light chain 1, cytoplasmic;Dynein light chain 2, cytoplasmic		4	57.3	0	12.221	1071500000	-0.311327	-0.753677	-0.0647515	NaN	-0.282018	-0.135428	NaN	NaN	NaN	NaN	-0.508055	0.0697022	NaN	0.300768	NaN	NaN	NaN	NaN	0.0467006	0.328607	0.385155	0.388686	0.26123	0.248049		0.225709	0.200492		0	NaN		0	NaN		1.16725	-0.182156	+	1.67164	-0.744068		0	-0.677353
RPL38	60S ribosomal protein L38		4	50	0	10.065	2202300000	0.0601858	-0.0649325	0.106214	-0.115519	-0.0922325	-0.0135235	-0.391645	-0.19375	NaN	NaN	NaN	NaN	0.0947765	0.101919	-0.00262814	-0.0129848	-0.0931094	-0.07514	NaN	-0.0707241	NaN	-0.0849304	NaN	-0.0541526		0.883467	-0.107581		0	NaN		1.12329	-0.125101		0	0.0307777		0.720328	0.11165		0.193275	-0.0308666
RPS21	40S ribosomal protein S21		3	42	0	6.4022	438090000	-0.012912	-0.527367	NaN	-0.37187	NaN	NaN	NaN	NaN	NaN	NaN	NaN	NaN	NaN	NaN	NaN	NaN	NaN	NaN	NaN	NaN	0.0780633	0.430392	NaN	NaN		0	-0.358958		-4.34e-08	0		-4.34e-08	0		0	NaN		0.629652	-0.524367		0	NaN
EIF5A;EIF5AL1	Eukaryotic translation initiation factor 5A-1;Eukaryotic translation initiation factor 5A;Eukaryotic translation initiation factor 5A-1-like		7	88.3	0	150.27	55356000000	-0.35925	-0.275454	-0.309681	-0.345344	-0.348831	-0.398113	-0.161508	-0.191969	-0.171027	-0.196244	-0.0556363	-0.182148	-0.202074	-0.256459	-0.206479	-0.14733	-0.203302	-0.139649	0.0926134	0.0455827	0.10742	0.0802483	0.106214	0.134878		0.581267	-0.0493012		0.200756	0.0301589		2.26359	0.0582434		0.708756	0.033485	+	3.69447	-0.392545		1.44581	-0.0931245
GNB2L1	Guanine nucleotide-binding protein subunit beta-2-like 1;Guanine nucleotide-binding protein subunit beta-2-like 1, N-terminally processed		20	74.1	0	258.86	39157000000	0.197488	0.138814	0.260748	0.131063	0.212383	0.207518	0.289598	0.385265	0.309409	0.266397	0.24184	0.277747	0.0784732	0.232538	0.238665	0.15056	0.156008	0.149519	0.0643311	0.00144204	0.0381553	0.207268	0.00748262	0.0581087		0.117193	-0.0153625		0.638063	-0.0660964		0.216095	-0.0311961		0.229002	-0.038981		0.738272	0.116728		0.0889435	0.0157916
ACTG1	Actin, cytoplasmic 2;Actin, cytoplasmic 2, N-terminally processed		1	80.8	0	323.31	914710000000	0.016639	0.0687396	0.0050406	0.0446039	0.067088	0.0739573	0.0340749	-0.054647	0.0265876	-0.0560562	-0.0383618	-0.036659	0.0360461	-0.0366738	0.0306892	-0.018878	0.00762616	-0.0193751	0.349139	0.341417	0.293959	0.326422	0.383607	0.429321		0.583469	0.0317434		0.539265	-0.0456975		0.225468	-0.0202295		0.812158	0.0667567	+	3.56719	-0.29046		0.263032	0.0201192
TPM4	Tropomyosin alpha-4 chain		8	44.4	0	65.356	6024300000	0.613532	0.879706	0.824646	0.489337	0.780142	0.69893	1.15853	1.02184	1.16884	1.05179	1.12796	1.16305	1.07053	1.24221	1.12294	0.810731	0.929715	0.664756	-0.453103	-0.60406	-0.713805	-0.688381	-0.7859	-0.655353		2.27972	-0.116491		0.0107855	-0.00213321		1.54421	-0.34349		0.206797	0.0372964	+	4.0968	1.44138	+	1.75331	-0.372596
ACTA1;ACTC1;ACTG2;ACTA2	Actin, alpha skeletal muscle;Actin, alpha cardiac muscle 1;Actin, gamma-enteric smooth muscle;Actin, aortic smooth muscle		3	43	0	48.755	45899000000	-0.0158409	0.0688771	0.00532815	0.0553346	0.0453032	0.0606008	-0.0362596	0.0396999	-0.0090887	-0.043988	-0.14484	-0.00232458	-0.104232	-0.0272044	-0.0248834	-0.0283958	-0.0259112	-0.143118	0.408929	0.540325	0.274292	0.167743	0.403922	0.353775		0.440845	0.0342914		0.376203	-0.0618346		0.0803703	-0.0137016		0.226183	0.0614222	+	1.27107	-0.307998		0.917192	0.0715614
EEF1A1;EEF1A1P5	Elongation factor 1-alpha 1;Putative elongation factor 1-alpha-like 3;Elongation factor 1-alpha		17	61.9	0	323.31	606160000000	0.138945	0.113834	0.188528	0.273456	0.275007	0.284277	0.137897	0.0490731	0.051024	0.121546	0.095587	0.0241777	0.0781998	0.15017	0.16221	0.126048	0.111565	0.10286	-0.498138	-0.51546	-0.344154	-0.43821	-0.325503	-0.415672		1.68741	0.130478		0.0150722	0.00110556		0.179495	-0.0167022		2.19546	0.0195031	+	3.36438	0.57971		0.189156	0.0169091
TUBA1B	Tubulin alpha-1B chain		0	66.3	0	323.31	437730000000	0.298658	0.327917	0.399554	0.415975	0.479644	0.420186	0.063779	0.0912598	0.037593	0.0655723	0.144046	0.0881415	0.177471	0.153935	0.142871	0.138421	0.166844	0.131853	-0.240827	-0.153286	-0.195814	-0.232566	-0.188808	-0.158623		0.876165	0.0965586		0.770117	0.0350428		0.304398	-0.0123864		0.0146423	-0.00219747	+	3.84614	0.535932		2.3599	0.183951
TUBA4A	Tubulin alpha-4A chain		5	67.9	0	27.92	18281000000	0.258338	0.239154	0.197236	0.304511	0.190425	0.443713	0.223917	0.309293	0.10809	0.335369	0.280838	0.233275	0.248049	0.373509	0.453755	0.387804	0.349025	0.358284	-0.235688	-0.245797	-0.267184	-0.211364	-0.207794	-0.155695		0.348028	0.0813071		0.533121	0.0693941		0.0300471	0.00660009		0.924456	0.0417227	+	4.38749	0.473024		0.949564	-0.126862
TUBB4B	Tubulin beta-4B chain		1	66.7	0	323.31	466070000000	0.336283	0.296545	0.346078	0.440208	0.384713	0.384381	0.0187766	-0.00643435	0.0190613	0.111432	0.0563061	0.0739573	0.131853	0.10286	0.0978804	0.154713	0.109561	0.0903115	-0.355129	-0.292917	-0.336938	-0.407555	-0.325268	-0.33428		1.21914	0.0767987		1.58682	0.0700973		0.308023	0.00733081		0.0632598	0.00757773	+	4.28326	0.672105	+	3.50923	0.215438
PAFAH1B2	Platelet-activating factor acetylhydrolase IB subunit beta		2	12.2	0	8.4641	1089100000	NaN	0.0490731	NaN	NaN	NaN	NaN	NaN	NaN	NaN	NaN	NaN	-0.258339	NaN	NaN	NaN	NaN	NaN	NaN	NaN	NaN	-0.065159	0.323082	0.33308	NaN		0	NaN		0	NaN		-4.34e-08	0		0	0.398239		0	-0.0798883		0	NaN
CXADR	Coxsackievirus and adenovirus receptor		6	22.2	0	18.66	3636700000	0.557288	0.537843	0.58477	0.872789	0.654344	0.66821	-0.154056	-0.0561612	0.227495	0.0267293	0.1137	0.0476779	NaN	1.2107	1.19975	1.4042	1.26267	NaN	2.56876	3.19577	2.59977	2.3425	2.42145	2.11167		0.850162	0.171814		0.168716	0.0569435		0	0.0519731		0.869891	-0.345387	+	2.97981	-2.15271	+	4.31812	-0.645259
GTF2I	General transcription factor II-I		11	17.1	0	48.937	3143700000	0.0508847	-0.0324772	0.0356239	0.199248	0.306729	-0.190585	-0.226898	0.291957	-0.387072	NaN	-0.227388	-0.16822	-0.15258	-0.0281457	-0.0505174	-0.399844	0.634407	0.125254	0.274053	-0.403542	-0.209979	0.235972	0.180275	-0.002657		0.185614	0.0871201		0.122689	-0.150247		0.274329	0.19702		0.382576	0.276407		0.306813	0.14386		0.966535	0.0950915
CCT2	T-complex protein 1 subunit beta		31	71	0	264	46369000000	0.326537	0.206268	0.234746	0.218595	0.352646	0.194717	0.291132	0.389897	0.274411	0.448795	0.440421	0.348459	0.456175	0.312897	0.491597	0.377624	0.32458	0.500292	-0.0741221	-0.161089	-0.121738	-0.0477261	-0.1067	-0.160943		0.00215111	-0.000531231		0.993334	0.0940784		0.236876	-0.0193911		0.020041	-0.0037377	+	2.75853	0.366035		1.1784	-0.164372
GSTO1	Glutathione S-transferase omega-1		20	64.3	0	98.828	35604000000	1.80587	1.94171	1.79527	1.6876	1.89829	1.85913	1.00612	0.726918	0.849359	0.977097	0.863621	0.941557	0.758218	0.73292	0.762136	0.789938	0.929715	0.797262	-2.11379	-2.14083	-2.01788	-2.15946	-2.06588	-2.26133		0.221741	-0.032609		0.507623	0.0666265		0.60558	0.0878802		0.411536	-0.0409421	+	6.36512	3.95367	+	4.66154	1.09652
PRKDC	DNA-dependent protein kinase catalytic subunit		91	26.7	0	258.63	19531000000	0.573665	0.480058	0.575506	0.578311	0.332507	0.578117	0.227495	0.294782	0.254836	0.306729	-0.0419368	0.107018	-0.0635147	0.138421	-0.0142664	0.0176369	0.180912	-0.0274691	0.0529723	0.191689	0.152897	0.214622	0.0396999	0.100978		0.345435	-0.0467646		0.422571	-0.135101		0.507178	0.0368131		2.32283	-0.121853	+	3.22078	0.356674	+	2.80142	0.522863
BASP1	Brain acid soluble protein 1	+	18	91.6	0	239.45	64888000000	-0.820871	-0.865674	-0.819343	0.695727	0.485736	0.578794	-0.523048	-0.589594	-0.555397	0.175812	0.301588	0.235114	-0.108114	-0.125179	-0.159122	0.675906	0.607674	0.422233	0.450802	-0.624221	-0.744342	-0.702679	0.309176	0.229588	+	2.92336	1.42205	+	2.3131	0.793517	+	2.12588	0.699409	+	2.72318	1.02027		1.7105	-0.144882	+	5.29878	-0.704491
DCD	Dermcidin;Survival-promoting peptide;DCD-1		4	35.5	0	11.619	4145300000	0.27965	-1.51602	-2.98142	-2.87588	-2.67567	-1.84513	-0.973979	-1.0531	-2.93335	-2.63084	-2.12048	-1.51128	-2.39866	-2.36483	NaN	-1.5555	-1.60731	NaN	NaN	-1.39912	-2.67218	-0.443046	-0.830845	-2.07875		0.316219	-1.05963		0.160733	-0.434055		1.46816	0.800342		0.0166469	0.102815		0.0290815	0.0988506		0.317454	0.975818
MRPS36	28S ribosomal protein S36, mitochondrial	+	4	57.3	0	28.125	218960000	NaN	-0.91357	-1.0956	NaN	NaN	NaN	NaN	NaN	NaN	NaN	NaN	NaN	NaN	NaN	NaN	NaN	NaN	NaN	NaN	NaN	NaN	NaN	NaN	NaN		0	NaN		-4.34e-08	0		-4.34e-08	0		-4.34e-08	0		0	NaN		0	NaN
ARF1	ADP-ribosylation factor 1	+	1	63.5	0	72.713	71479000000	-1.01057	-1.07516	-1.01022	0.992116	0.907121	0.983751	-1.14133	-1.28216	-1.10749	0.534659	0.519944	0.623305	0.607958	0.453017	0.429	1.90134	2.05551	1.73894	1.66002	0.207518	0.113967	0.253626	1.62588	1.59431	+	5.05545	1.99298	+	3.35476	1.7363	+	2.2934	1.40194	+	2.9132	1.43503	+	4.91023	-1.22369	+	4.84829	-1.52864
ARF5	ADP-ribosylation factor 5	+	8	64.4	0	210.76	161160000000	-1.07051	-1.05724	-1.00596	0.847676	0.826355	0.698218	-1.01075	-1.07388	-1.02662	0.560715	0.556307	0.616264	0.597031	0.443076	0.513693	1.74679	1.59015	1.69809	1.09343	0.0453032	-0.0263814	-0.0916329	1.18085	1.1277	+	2.88487	1.83532	+	3.7316	1.61484	+	3.96962	1.16041	+	2.64575	1.15823	+	4.68162	-1.02033	+	5.25151	-1.5625
ERH	Enhancer of rudimentary homolog		3	26.9	0	26.977	609080000	-0.212417	-0.0978724	-0.299827	-0.124503	NaN	0.0321009	NaN	0.452385	NaN	NaN	NaN	NaN	NaN	NaN	NaN	NaN	-0.161686	NaN	NaN	-0.165871	-0.13687	NaN	0.165815	NaN		0.474735	0.209921		0	NaN		0	NaN		0	0.302686		0.264216	-0.0520013		0	NaN
SRSF3	Serine/arginine-rich splicing factor 3		8	61.3	0	29.571	3724500000	-0.179302	-0.357973	-0.426819	-0.320144	-0.180822	-0.282614	NaN	0.659468	0.6277	0.925088	0.931532	0.745108	0.641546	NaN	0.612777	0.212134	0.579856	0.340164	0.789354	0.744506	0.635244	0.622462	0.460481	0.865602		0.213509	0.0601714		0.618632	0.194736		0.854201	-0.351013		0.105633	0.0377418	+	3.53976	-0.988769	+	2.65898	-0.948526
DAB2	Disabled homolog 2		2	3.8	0	4.2771	394530000	NaN	NaN	NaN	NaN	NaN	NaN	NaN	NaN	NaN	NaN	NaN	NaN	NaN	NaN	NaN	NaN	NaN	NaN	-0.2188	NaN	NaN	NaN	0.527571	NaN		-4.34e-08	0		-4.34e-08	0		-4.34e-08	0		0	NaN		-4.34e-08	0		-4.34e-08	0
SLC25A3	Phosphate carrier protein, mitochondrial		13	39.6	0	93.427	32145000000	0.266277	0.208392	0.305912	0.36793	0.298541	0.348572	-0.0297942	-0.130302	-0.0479796	-0.116348	-0.0926017	-0.150273	-0.193585	-0.260135	-0.216719	-0.153671	-0.213354	-0.135523	-0.48223	-0.493215	-0.46923	-0.468092	-0.450143	-0.480257		1.30588	0.0781541		0.428172	-0.0503821		1.31576	0.055964		0.229835	0.00596888	+	4.81853	0.73704	+	3.82913	0.483674
CDK5	Cyclin-dependent-like kinase 5		2	8.2	0.0010805	2.7098	167220000	NaN	NaN	NaN	NaN	NaN	NaN	NaN	NaN	NaN	NaN	NaN	NaN	NaN	NaN	NaN	NaN	NaN	NaN	NaN	-0.893357	-0.627516	NaN	NaN	NaN		-4.34e-08	0		-4.34e-08	0		-4.34e-08	0		0	NaN		0	NaN		-4.34e-08	0
REEP5	Receptor expression-enhancing protein 5		5	16.4	0	63.748	14241000000	0.888695	1.04061	0.945982	0.997618	0.948302	0.941557	0.206018	0.212258	0.223423	0.185867	0.1121	0.149259	-0.350596	-0.321568	-0.26304	-0.318416	-0.345986	-0.353819	-0.768985	-0.803217	-0.625689	-0.604806	-0.695232	-0.723587		0.0219383	0.00406259		0.956125	-0.0648243		0.28599	-0.0276724		0.428581	-0.0513641	+	4.53846	1.63633	+	4.80373	1.27016
SORD	Sorbitol dehydrogenase		6	21.3	0	19.589	840810000	NaN	0.0858326	NaN	NaN	NaN	0.153935	NaN	-0.486509	NaN	NaN	NaN	NaN	NaN	0.503247	NaN	NaN	NaN	NaN	-0.0497705	-0.596907	-0.143771	-0.109483	-0.451958	NaN		0	NaN		0	NaN		0	NaN		0.08272	0.119475		0	0.36922		0	-0.417414
HNRNPU	Heterogeneous nuclear ribonucleoprotein U		22	32.5	0	114.23	32784000000	-0.295146	-0.536608	-0.22803	-0.328145	-0.597889	-0.377201	-0.100036	-0.131898	-0.31362	-0.290974	-0.0702242	-0.0673794	-0.196938	-0.198411	-0.301142	-0.29488	-0.313907	-0.380765	-0.0745626	-0.135459	-0.0387619	-0.107679	0.0116388	-0.0531494		0.83529	-0.0811505		0.103815	0.0389921		1.95651	-0.0976875		2.51765	0.0552756	+	1.24229	-0.259294		0.534746	-0.121098
FABP5	Fatty acid-binding protein, epidermal		6	54.1	0	14.224	855170000	NaN	NaN	-1.11694	-0.663945	-0.443713	NaN	NaN	-0.496387	NaN	-0.859143	NaN	NaN	NaN	NaN	NaN	NaN	NaN	-1.36837	-0.802965	-0.844225	-2.29903	-1.14086	-1.53391	-0.897678		0	NaN		0	NaN		0	NaN		0.608685	0.349852		0	0.311094		0	NaN
CAP1	Adenylyl cyclase-associated protein 1		24	58.7	0	209.41	37403000000	0.422018	0.415759	0.472904	0.491802	0.547746	0.581496	0.597412	0.488618	0.683741	0.750778	0.582941	0.686613	0.663755	0.561106	0.695905	0.615793	0.527571	0.623399	-0.115019	-0.126061	-0.16054	-0.217776	-0.131724	-0.193833		1.53174	0.103455		0.706302	0.0835203		1.3395	-0.0513343		1.24478	0.021267	+	4.32072	0.605019		1.98899	-0.203362
HMGCS1	Hydroxymethylglutaryl-CoA synthase, cytoplasmic		6	16	0	10.482	811620000	NaN	NaN	NaN	NaN	NaN	NaN	NaN	NaN	NaN	NaN	NaN	NaN	NaN	NaN	NaN	NaN	NaN	NaN	-1.0245	NaN	-0.663305	-0.440675	-0.482049	-1.31255		-4.34e-08	0		-4.34e-08	0		-4.34e-08	0		0.200321	-0.345307		0	NaN		-4.34e-08	0
IFITM3;IFITM2	Interferon-induced transmembrane protein 3		2	49.6	0	49.032	8403900000	1.42863	1.19087	1.40005	1.62597	1.74334	1.67347	-0.213036	-0.202323	-0.297981	-0.245933	-0.0865074	-0.0354461	1.43275	1.35389	1.55198	1.52952	1.26885	1.59536	NaN	2.65782	2.87582	2.88391	2.83633	2.76184		1.05917	0.341081		0.509404	0.115151		0.11583	0.0183727		0.521695	-0.0807834	+	3.81053	-1.46601		0.49028	-0.106359
SLC7A5	Large neutral amino acids transporter small subunit 1		11	19.5	0	70.525	24662000000	0.609755	0.489029	0.570366	0.471656	0.565402	0.522257	0.316146	0.214622	0.24306	0.219091	0.254473	0.210513	0.11703	0.0398403	0.133169	0.0278618	0.175301	0.0302654	0.0539454	0.0272955	0.0247452	0.0447438	0.0781998	0.00920381		0.210678	-0.0366117		0.277128	-0.0299167		0.0810117	-0.0188703		0.20079	0.0148548	+	3.88334	0.524122	+	3.25844	0.459704
PFKP	ATP-dependent 6-phosphofructokinase, platelet type		22	42	0	223.99	22443000000	0.413486	0.300651	0.434134	0.364236	0.416083	0.475604	0.0953169	0.0662615	0.0764222	0.202261	0.178874	0.177471	0.0783365	0.109829	0.121944	0.0839282	-0.000620475	0.155231	-0.344355	-0.243711	-0.245728	-0.222734	-0.260722	-0.354077		0.275919	0.035884		3.0113	0.106869		0.192318	-0.0238566		0.848447	-0.082327	+	3.90671	0.620148	+	2.52089	0.279387
TAGLN	Transgelin		14	70.6	0	76.719	69577000000	0.0694272	0.1137	0.157691	0.253505	0.27608	0.234746	0.532267	0.33411	0.625083	0.452806	0.482952	0.482538	0.683472	0.659194	0.635429	0.595599	0.464877	0.655077	0.528071	0.442758	0.537346	0.470719	0.450591	0.503959		1.30463	0.141171		0.0921829	-0.0243882		0.534269	-0.0875139		0.068315	0.0105997	+	3.20995	-0.370001	+	4.32783	-0.545759
DSG1	Desmoglein-1		9	13.1	0	16.767	967870000	NaN	NaN	-3.12557	-2.0063	NaN	-1.59322	NaN	-1.6674	-1.2124	NaN	NaN	-0.733291	NaN	-2.92577	NaN	NaN	NaN	-3.94873	NaN	-1.38477	-2.7314	NaN	NaN	NaN		0	1.53235		0	0.479109		0	NaN		0	NaN		0	-1.06749		0	-0.199804
RPL18A	60S ribosomal protein L18a		15	59.7	0	34.528	18132000000	-0.110339	-0.134382	-0.192497	-0.245335	-0.0456548	-0.140492	0.300182	0.141956	0.0772429	0.115566	-0.0140916	-0.00536231	-0.121204	-0.249634	-0.14366	-0.143596	-0.100855	-0.0962213	0.0714881	0.107018	0.118759	0.16092	0.159887	0.0797024		0.00856038	0.00191239		1.36273	-0.14109		0.439091	0.0579416		0.257076	-0.0252063	+	3.13772	-0.274638		0.215263	0.0257597
FKBP4	Peptidyl-prolyl cis-trans isomerase FKBP4;Peptidyl-prolyl cis-trans isomerase FKBP4, N-terminally processed		25	69.1	0	169.28	31021000000	0.539531	0.391328	0.461843	0.51005	0.621712	0.573278	0.237686	0.32964	0.353662	0.220454	0.350724	0.440208	0.448795	0.405012	0.321005	0.36233	0.353549	0.443607	0.277271	0.252537	0.23585	0.255803	0.223052	0.245496		0.522882	0.104113		0.371856	0.0301323		0.0249315	-0.0051088		0.0139763	0.000542949	+	2.12518	0.216171		0.567241	0.07263
RPL6	60S ribosomal protein L6		25	56.9	0	220.9	194300000000	-0.1588	-0.207344	-0.150545	-0.217893	-0.167005	-0.216485	0.0465609	0.0742315	0.0472592	0.0119249	-0.0226394	0.015212	-0.100067	-0.0587133	-0.0434824	-0.0609239	-0.0886076	0.00259443	0.309758	0.246104	0.325041	0.299596	0.30147	0.258338		0.303245	-0.0282311		0.90777	-0.054518		0.278682	0.0184417		0.00372328	-0.000391493	+	4.02972	-0.462477		1.89113	-0.104809
AKAP12	A-kinase anchor protein 12	+	24	24.3	0	146.31	5383600000	-0.598654	-0.651745	-0.530343	0.939151	0.765365	0.65306	-0.526494	-0.106203	-0.235603	0.95784	0.728661	1.0383	0.127237	0.34551	0.592062	1.62686	1.08216	1.31568	1.72587	0.0533895	0.00475299	-0.183441	NaN	1.59431	+	2.2488	1.37944	+	1.60943	1.1977		1.21158	0.98663	+	1.7118	1.72512	+	2.62891	-0.551814	+	2.6202	-0.948517
CAV1	Caveolin-1;Caveolin		9	66.9	0	55.647	30987000000	1.08332	1.21952	1.27858	1.10976	1.14919	1.2441	1.00259	0.97673	1.14222	0.964436	1.14098	0.939527	0.709555	0.685447	0.616734	0.621524	0.751292	0.752663	1.5372	1.43776	1.43803	1.4297	1.29231	1.53565		0.344175	-0.0261228		0.0797437	-0.0255347		0.204568	0.0379145		0.0795809	0.0198929	+	1.85286	-0.241355	+	2.91	0.523228
GBE1	1,4-alpha-glucan-branching enzyme		9	19.4	0	34.269	2464100000	0.613249	0.535953	0.706376	0.134878	0.508429	0.280244	0.0193461	0.318577	-0.139951	NaN	0.100036	0.361993	0.0576928	-0.0432891	NaN	-0.555736	0.0182068	0.128953	-0.0674096	-0.23243	0.0773797	0.00273846	0.0140695	-0.211281		0.793631	-0.310676		0.118376	0.141701		0.249023	-0.275966		0.115548	-0.0374364	+	2.49922	0.669297	+	2.43173	0.611324
EIF4G1	Eukaryotic translation initiation factor 4 gamma 1		1	30.3	0	102.02	16132000000	0.41045	0.416948	0.52095	0.4609	0.451224	0.54201	0.331361	0.3667	0.226509	0.368489	0.176323	0.279174	0.346645	0.373843	0.382391	0.397693	0.50457	0.315566	-0.220917	-0.274407	-0.172717	-0.254272	-0.197848	-0.131076		1.2719	0.0352622		0.148091	-0.0335279		0.24182	0.0383169		0.444159	0.0505186	+	3.87033	0.683248		1.0276	0.0818231
GLO1	Lactoylglutathione lyase		7	46.2	0	34.201	7098400000	0.993856	1.19005	0.818196	0.844546	1.03097	0.763836	0.735869	0.692516	0.759071	0.735609	0.580242	0.68715	0.590434	0.654619	0.489646	0.617016	0.692963	0.805623	-0.6254	-0.541639	-0.452491	-0.590984	-0.483803	-0.591592		1.16408	-0.120914		0.696165	-0.0614849		0.506565	0.126968		0.596667	-0.0385607	+	3.73609	1.52907	+	1.63943	0.422466
AKR1C1	Aldo-keto reductase family 1 member C1		0	65.3	0	39.448	2353000000	1.45518	1.3794	1.12168	1.60611	1.57294	1.56968	1.3173	1.09687	NaN	NaN	1.05499	NaN	NaN	1.22626	0.726831	1.13803	NaN	1.49539	0.391878	0.402504	0.48656	0.547943	0.572211	0.216858		0.981611	0.26416		0	-0.0418818		0	0.768557		0.245714	-0.0853535	+	2.81022	0.839749		0.639944	0.342205
YWHAH	14-3-3 protein eta		10	56.9	0	101.37	11870000000	0.0149266	0.0391384	0.0496307	-0.0979959	0.205518	0.141171	0.140255	-0.0712999	-0.0747905	0.0103502	0.0329472	0.0563061	-0.0203404	-0.157335	-0.0561312	-0.133005	-0.0655062	0.097476	-0.249839	-0.198014	-0.349144	-0.252965	-0.234007	-0.412577		0.206842	0.0483324		0.147029	0.0351463		0.195509	0.0442571		0.138583	-0.0321006	+	2.57447	0.301273		1.24891	0.112501
PLP2	Proteolipid protein 2		2	18.4	0	18.931	4878400000	0.582267	0.553557	0.234501	0.533663	0.866868	0.816723	0.202763	NaN	-0.134224	-0.254565	-0.23343	NaN	NaN	NaN	NaN	NaN	NaN	NaN	NaN	NaN	NaN	NaN	NaN	NaN		0.580985	0.28231		0	-0.457327		-4.34e-08	0		-4.34e-08	0		0	NaN		0	NaN
SRSF11	Serine/arginine-rich splicing factor 11		9	28.8	0	69.064	12688000000	-0.744608	-1.06585	-1.26032	-0.812587	-0.758135	-0.9218	0.229834	0.403704	0.361432	0.616922	0.49375	0.622649	0.272501	0.201007	0.326767	0.544782	0.177854	0.360196	0.307895	0.158208	0.121148	0.0708015	0.226755	0.705491		0.555727	0.192755		0.984411	0.246117		0.389944	0.0941856		0.653312	0.296661	+	2.76712	-1.14031	+	2.94709	-1.29035
EEF1A2	Elongation factor 1-alpha 2		6	48.4	0	46.797	2455200000	NaN	-0.696541	NaN	NaN	-0.660566	-0.977156	NaN	-0.970413	-0.159621	NaN	NaN	-0.226949	-0.842077	NaN	NaN	-0.39407	-0.539289	-0.453557	-0.710307	-0.853997	-1.22341	-1.01517	-1.25384	-1.02741		0	0.0359746		0	-0.0673275		0	0.448007		0.218748	0.0336715		0	0.334317		0	0.145536
KDSR	3-ketodihydrosphingosine reductase		11	39.2	0	46.91	6629500000	2.93571	5.28118	NaN	NaN	NaN	2.913	1.84675	NaN	2.41622	1.87417	NaN	NaN	1.93723	2.07457	NaN	2.42578	NaN	1.89177	-1.88694	-1.77878	-1.73884	-1.83238	-1.66383	-1.68288		0	NaN		0	0.0274134		0	0.48855		0.178651	0.0387847	+	2.17497	5.89178		0.666797	2.10254
PSME1	Proteasome activator complex subunit 1		8	41	0	47.853	4138600000	0.013498	0.122739	0.226755	0.0446039	0.0255958	0.0862402	-0.156804	-0.352676	-0.366392	-0.52849	-0.251625	-0.146962	-0.248108	-0.342836	-0.287924	-0.191162	-0.215764	-0.476579	-0.20307	-0.104465	-0.441968	-0.231803	-0.279196	-0.0325657		0.504186	-0.0688507		0.0299737	-0.0170682		0.00498745	-0.00154578		0.348677	0.0878011	+	1.51457	0.380409	+	2.44777	0.413953
FMR1	Fragile X mental retardation protein 1		1	5.8	0.0010684	2.5248	601060000	-0.182901	NaN	NaN	-0.931948	NaN	-0.205031	NaN	-0.692152	-0.149313	-1.26299	NaN	NaN	-0.43651	NaN	NaN	NaN	NaN	NaN	NaN	NaN	-0.568409	NaN	NaN	NaN		0	-0.749048		0	NaN		0	NaN		0	NaN		0	0.385509		0	0.253609
PRDX1	Peroxiredoxin-1		13	75.4	0	160.08	117980000000	0.0626743	0.00834347	-0.00775365	0.00690831	0.0396999	-0.0450146	0.101516	0.10017	0.093425	0.0867838	0.109026	0.131853	0.0880058	0.147697	0.0187766	0.155361	0.063779	0.142871	0.411969	0.349592	0.363003	0.430285	0.368824	0.386259		0.284762	-0.0205568		0.256837	0.0108506		0.206193	0.0358436		0.0873852	0.0080574	+	3.40557	-0.359872		0.674392	-0.0637386
RPL18	60S ribosomal protein L18		19	64.9	0	214.8	557180000000	-0.172197	-0.302902	-0.157254	-0.262521	-0.267114	-0.249462	-0.0667598	-0.118758	-0.10813	-0.0709968	-0.221489	-0.136585	-0.193206	-0.148545	-0.166389	-0.173498	-0.19314	-0.141971	0.210264	0.0854246	0.0535284	0.162726	0.10916	0.194591		0.434758	-0.0489144		0.573304	-0.0451408		0.00216413	-0.000156487		0.898058	0.070779	+	2.27674	-0.311344		0.359105	-0.0414047
C1QBP	Complement component 1 Q subcomponent-binding protein, mitochondrial		5	26.2	0	77.569	18241000000	-0.52745	-0.347619	-0.374767	-0.590441	-0.452353	-0.610037	-0.612417	-0.418446	-0.564585	-0.299631	-0.612704	-0.648327	-0.31784	-0.375328	-0.421399	-0.328526	-0.30381	-0.273657	-0.0478006	0.044464	-0.00194893	0.111699	0.0329472	0.0795658		0.912208	-0.134332		0.0237364	0.0115955		0.572009	0.069525		0.29937	-0.0298339	+	2.70589	-0.468017		0.286714	-0.0450893
CKAP4	Cytoskeleton-associated protein 4		32	56.6	0	323.31	67931000000	1.1135	1.18161	1.22503	0.811389	0.796016	0.836732	-0.168982	-0.202389	-0.168593	-0.448705	-0.422714	-0.431832	0.234746	0.200755	0.206643	0.367371	0.248778	0.304044	-0.000663834	-0.153495	-0.106762	-0.102899	-0.0053479	-0.10372		2.21019	-0.358668		2.31814	-0.254429		1.19734	0.0926824		0.694009	0.0844746	+	5.43271	1.29443	+	5.02187	0.959332
SPAG1	Sperm-associated antigen 1		2	2.8	0	4.0001	145110000	-0.785154	NaN	-0.963447	NaN	NaN	NaN	NaN	-0.698576	NaN	NaN	NaN	NaN	NaN	NaN	NaN	NaN	NaN	NaN	NaN	NaN	NaN	NaN	NaN	NaN		0	NaN		0	NaN		-4.34e-08	0		-4.34e-08	0		0	NaN		0	NaN
KHDRBS1;KHDRBS3;KHDRBS2	KH domain-containing, RNA-binding, signal transduction-associated protein 1;KH domain-containing, RNA-binding, signal transduction-associated protein 3;KH domain-containing, RNA-binding, signal transduction-associated protein 2		2	7.2	0	15.868	992190000	NaN	NaN	NaN	NaN	NaN	NaN	NaN	NaN	NaN	NaN	NaN	NaN	NaN	-0.13668	0.0945064	NaN	NaN	0.0771063	NaN	NaN	NaN	NaN	-0.190684	NaN		-4.34e-08	0		-4.34e-08	0		0	-0.0174001		0	NaN		-4.34e-08	0		0	NaN
BAX	Apoptosis regulator BAX		5	33.5	0	10.333	439600000	NaN	NaN	0.765535	NaN	NaN	NaN	NaN	0.682753	NaN	NaN	-0.173596	-0.0669562	0.231678	NaN	NaN	NaN	NaN	NaN	NaN	NaN	NaN	NaN	NaN	NaN		0	NaN		0	-0.856349		0	NaN		-4.34e-08	0		0	NaN		0	0.533857
PPP3CA	Serine/threonine-protein phosphatase 2B catalytic subunit alpha isoform;Serine/threonine-protein phosphatase		10	24.5	0	30.15	3385100000	-0.190635	-0.306109	-0.232481	0.250962	0.331705	0.509138	-0.00384265	-0.168512	-0.0703454	0.363788	0.327112	0.270947	0.134221	0.129613	0.31742	0.334568	0.407842	0.102994	0.135272	-0.134873	-0.277534	-0.226257	0.159629	0.0772429	+	1.69117	0.60701		1.86008	0.401516		0.205604	0.0880504		1.65408	0.336936		0.219107	-0.0301871	+	2.46314	-0.436826
DHX9	ATP-dependent RNA helicase A		17	14.7	0	60.02	3129200000	-0.194741	-0.203801	-0.230025	-0.297591	-0.620534	-0.132325	0.171847	0.136979	-0.191508	0.462367	-0.217809	0.0807941	-0.0669562	0.401412	-0.13329	-0.197368	0.176195	-0.216049	0.0777899	0.124063	0.276794	0.235604	-0.106576	-0.187313		0.34999	-0.140628		0.110816	0.0693443		1.13554	-0.146129		0.852323	-0.284187	+	3.07446	-0.421676		0.753832	-0.276578
CD47	Leukocyte surface antigen CD47		2	5.8	0.00054735	2.8494	488690000	NaN	0.976584	0.418028	NaN	NaN	0.488824	0.0126402	NaN	NaN	0.480886	-0.0107447	NaN	-0.374692	NaN	NaN	NaN	NaN	NaN	NaN	NaN	NaN	NaN	NaN	NaN		0	0.0707955		0	0.468245		0	NaN		-4.34e-08	0		0	NaN		0	1.072
SSRP1	FACT complex subunit SSRP1		6	12	0	10.276	838820000	-0.391853	NaN	NaN	NaN	0.0720372	-0.448568	0.891808	NaN	0.284988	NaN	NaN	NaN	0.15004	NaN	NaN	NaN	NaN	NaN	0.173	0.343919	0.368489	0.102457	-0.0667295	-0.162557		0	NaN		0	NaN		0	NaN		1.19255	-0.290384		0	-0.663475		0	-0.541893
NSUN2	tRNA (cytosine(34)-C(5))-methyltransferase		28	48	0	127.27	14340000000	-0.103658	-0.0373103	0.0517201	0.041243	-0.194443	0.018919	0.158725	0.00302647	-0.0596904	-0.0893747	-0.21875	-0.155486	-0.030413	-0.0265283	-0.0509657	-0.079661	0.271904	0.0366088	-0.277342	-0.160653	-0.109561	-0.352179	-0.263473	-0.205098		0.0556313	-0.0150109		1.24504	-0.188557		0.417305	0.112253		0.151041	-0.041173		0.962255	0.177715		0.0466246	0.00621946
RBBP4;RBBP7	Histone-binding protein RBBP4		2	13.2	0	20.268	2737300000	0.208517	0.00575919	0.125387	0.212507	0.154583	0.0617071	-0.051773	0.199751	0.0387171	0.234501	0.209141	0.0958569	0.259182	0.0980152	0.262072	0.332737	0.446997	0.324926	0.291957	0.211261	0.317767	0.282973	0.342213	0.419323		0.166096	0.0297114		0.519135	0.117602		0.645571	0.161797		0.885055	0.0804972		1.11039	-0.157446		0.510318	-0.0932021
AHNAK	Neuroblast differentiation-associated protein AHNAK		30	20	0	77.579	7150500000	0.144177	0.0172092	-0.12089	-0.14409	-0.0741221	0.25689	-0.0809422	-0.0907722	0.0784732	0.247077	0.303342	0.253384	0.892119	0.42664	0.0366088	-0.131124	0.324004	-0.477502	-0.679203	-0.642302	-0.657013	-0.908632	-0.848271	-0.802839		0.000943075	-0.000606015		1.3561	0.299015		0.753361	-0.546663		0.166677	-0.040789	+	2.53708	0.749481		0.780737	-0.438291
GALNT2	Polypeptide N-acetylgalactosaminyltransferase 2;Polypeptide N-acetylgalactosaminyltransferase 2 soluble form		24	46.1	0	141.28	50199000000	0.971663	1.03865	1.0708	1.05095	1.14222	1.07361	-0.458644	-0.537529	-0.456861	-0.478748	-0.453123	-0.552431	-1.1977	-1.24424	-1.18069	-1.03709	-1.02806	-0.950815	1.16253	0.933497	0.958286	1.00497	1.1115	1.19049		0.748738	0.0618916		0.0654304	-0.0104231		1.96695	0.202224		1.8792	0.189256		0.789231	0.0614533	+	6.45125	2.23458
GALNT1	Polypeptide N-acetylgalactosaminyltransferase 1;Polypeptide N-acetylgalactosaminyltransferase 1 soluble form		10	27.7	0	27.663	3718200000	1.08753	1.27178	1.16575	1.02439	0.858777	0.863621	-0.0759914	0.0271541	-0.128677	-0.105675	0.0436244	0.192321	0.732573	1.17466	0.877509	1.18168	0.935083	0.754203	1.6703	1.58722	1.18136	1.53306	0.800496	1.67645		0.891047	-0.259426		0.347284	0.102595		0.0433724	0.028739		0.104923	-0.0514674		0.873288	-0.258859		0.811948	0.246774
AP1B1	AP-1 complex subunit beta-1		7	27.4	0	8.6792	1698900000	NaN	0.338567	0.494159	NaN	0.266157	0.307195	0.637564	0.605305	0.908429	0.205142	0.753605	0.412944	0.402831	0.780898	-0.278916	0.740798	0.482642	0.573956	-0.21687	-0.270626	-0.250989	0.0514416	-0.0903267	NaN		0.577139	-0.129687		0.478415	-0.259869		0.331812	0.297528		0.530988	0.107209	+	1.52722	0.573088		0.0995801	0.114759
BST2	Bone marrow stromal antigen 2		7	28.9	0	35.482	30141000000	0.459956	0.349139	0.357158	0.426855	0.298072	0.446256	-0.365277	-0.147298	-0.183884	-0.308359	-0.246207	-0.226594	1.82407	1.97045	1.97904	2.15985	1.70624	1.84752	0.23352	-0.121016	-0.160879	-0.101892	0.262313	0.0832474		0.0116114	0.00164347		0.222821	-0.0282339		0.0349963	-0.0199825		1.34387	0.320956	+	3.69717	0.51668	+	4.81193	-1.53577
PMPCA	Mitochondrial-processing peptidase subunit alpha		4	9	0	22.383	1490700000	-0.419546	-0.182917	-0.731254	-0.583917	-0.851782	NaN	-0.349916	NaN	-0.59144	NaN	NaN	NaN	-0.530885	NaN	NaN	NaN	-0.494292	-0.619403	0.0485151	-0.194691	0.935988	-0.0801337	-0.11868	0.146916		0.46018	-0.416618		0	NaN		0	NaN		0.158077	-0.194804	+	0.78049	-0.66496		0	0.0863126
TWF1	Twinfilin-1		3	8	0	5.2497	280950000	NaN	NaN	-0.339035	NaN	NaN	-0.234499	NaN	NaN	NaN	NaN	NaN	NaN	NaN	NaN	NaN	NaN	NaN	NaN	-0.737471	0.0313951	NaN	NaN	NaN	0.03492		0	0.104536		-4.34e-08	0		-4.34e-08	0		0	-0.768866		0	-0.37043		0	NaN
ASPH	Aspartyl/asparaginyl beta-hydroxylase		9	16.8	0	32.836	2586700000	0.537445	0.584866	0.631896	0.456596	0.44074	-0.0062604	0.108625	0.182565	0.123269	-0.0586082	-0.0217165	-0.144552	-0.194526	-0.267792	-0.254014	-0.117819	-0.190026	0.140517	0.0496307	0.237319	0.0824301	0.189793	0.315218	0.213752		0.612529	-0.287711		1.73354	-0.213112		0.646422	0.183001		0.061936	0.0230196	+	2.83265	0.414888	+	4.69687	0.823513
SF3A3	Splicing factor 3A subunit 3		5	10.6	0	5.9083	1069700000	NaN	-0.126832	NaN	NaN	0.25882	NaN	NaN	-0.0352391	0.283092	0.394953	NaN	NaN	NaN	0.0669503	0.23352	0.596744	0.269751	0.546759	0.415001	0.395502	0.362891	0.237931	-0.000100957	0.346078		0	0.385653		0	NaN		0.872188	0.25802		0.192645	-0.0784483		0	-0.45894		0	-0.277068
AIMP1	Aminoacyl tRNA synthase complex-interacting multifunctional protein 1;Endothelial monocyte-activating polypeptide 2		3	14.1	0	4.5657	241970000	NaN	NaN	NaN	NaN	NaN	NaN	NaN	NaN	NaN	NaN	NaN	NaN	NaN	NaN	NaN	NaN	NaN	NaN	NaN	-0.578715	-0.723063	NaN	NaN	NaN		-4.34e-08	0		-4.34e-08	0		-4.34e-08	0		0	NaN		0	NaN		-4.34e-08	0
ILF3	Interleukin enhancer-binding factor 3		10	19.7	0	12.434	657130000	-1.00335	-0.469729	NaN	NaN	-0.487682	-0.336537	NaN	NaN	NaN	-0.346206	NaN	NaN	NaN	NaN	NaN	NaN	-0.0389695	-0.299738	0.0524158	0.267955	0.0875986	0.245617	0.24987	NaN		0	-0.0179527		0	NaN		0	NaN		0.0405627	-0.026634	+	1.66774	-0.936931		0	NaN
LMAN2	Vesicular integral-membrane protein VIP36		5	17.4	0	9.7972	1810000000	0.110764	-0.290286	NaN	0.174406	-0.0262051	NaN	NaN	0.364909	-0.345051	-0.059029	0.486869	0.185867	-0.22122	-0.292369	-0.671416	-0.0239444	-0.875487	-0.0219509	NaN	0.503451	0.220206	0.198745	0.257856	-1.48374		0.456617	0.163862		0.448242	0.326439		0.0809682	0.0878744		0.288831	-0.822419		0.867269	-0.397228		0.547346	0.305241
TRAP1	Heat shock protein 75 kDa, mitochondrial		24	42.1	0	133.71	60456000000	0.0655723	0.125916	-0.0282045	0.214622	0.115699	0.0812032	-0.371852	-0.303276	-0.231651	-0.343073	-0.493825	-0.298957	-0.164513	-0.263542	-0.260791	-0.154506	-0.216217	-0.0864308	-0.133052	-0.0718155	-0.111041	-0.090081	-0.127116	-0.152548		0.645846	0.0827471		0.453363	-0.0763589		0.583809	0.077231		1.03321	-0.0465933		1.45952	0.145407	+	2.16379	0.284043
ECH1	Delta(3,5)-Delta(2,4)-dienoyl-CoA isomerase, mitochondrial		6	36.9	0	120.22	7183000000	1.59015	1.29666	1.25211	1.70907	1.29825	1.28137	-0.287255	0.850079	-0.144855	0.0371714	0.0398403	-0.320072	-0.111508	-0.297289	0.0503276	-0.240776	-0.23545	-0.337065	-0.468112	-0.753896	-0.617676	-0.705335	-0.707878	-0.794132		0.531619	0.0499224		0.243153	-0.220343		0.438592	-0.151607		0.0954193	0.035595	+	4.27935	2.07194	+	3.29424	1.49913
FLII	Protein flightless-1 homolog		8	8.7	0	11.482	1382700000	NaN	NaN	NaN	NaN	NaN	NaN	NaN	NaN	NaN	NaN	NaN	NaN	NaN	NaN	1.66762	NaN	NaN	NaN	-0.906845	NaN	NaN	-0.409853	-0.30693	NaN		-4.34e-08	0		-4.34e-08	0		0	NaN		0	NaN		0	NaN		0	NaN
COASY	Bifunctional coenzyme A synthase;Phosphopantetheine adenylyltransferase;Dephospho-CoA kinase		11	30.3	0	46.523	3095800000	NaN	0.353662	0.438399	0.604451	0.803971	0.400757	0.00432164	0.026021	-0.0019634	0.0519985	0.0490731	0.273934	-0.124173	0.0911243	0.268434	0.39846	NaN	0.19131	-1.16832	-1.13378	-0.965277	-1.14289	-1.06894	-1.22718		0.257201	0.206333		0.541144	0.115542		0.226746	0.222754		1.16016	-0.0741625	+	3.4442	1.47668		0.905289	0.317569
ACACA	Acetyl-CoA carboxylase 1;Biotin carboxylase		90	47.4	0	323.31	57259000000	-0.85444	-0.769502	-0.541366	-0.790834	-0.635047	-0.882438	-0.682279	-0.739468	-0.656217	-0.795108	-0.556011	-0.793457	-0.669258	-0.843836	-0.679342	-0.897221	-0.756502	-0.698857	-0.605069	-0.554718	-0.527887	-0.529573	-0.63433	-0.684805		0.108964	-0.0476701		0.0708822	-0.0222039		0.205888	-0.0533811		1.12262	-0.104009		0.917236	-0.184377		0.027788	0.00904286
MTAP	S-methyl-5-thioadenosine phosphorylase;Purine nucleoside phosphorylase		14	67.5	0	104.49	14190000000	0.966726	0.903193	0.853117	0.860844	1.06502	1.10212	0.657	0.796515	0.746055	1.10051	0.365469	1.0588	0.522558	0.428678	0.535655	0.510152	0.265317	0.52306	-0.768027	-0.838977	-0.745285	-0.792432	-0.835548	-0.852303		0.355002	0.10165		0.137224	0.108403		0.470883	-0.0627875		0.189146	-0.0263947	+	5.62899	1.69991	+	3.02755	0.412048
HNRNPA0	Heterogeneous nuclear ribonucleoprotein A0		3	11.5	0	7.4393	331280000	NaN	NaN	NaN	NaN	NaN	-0.590919	0.47892	0.30906	0.126444	NaN	NaN	NaN	-0.00826141	0.0447438	-0.0220388	0.0304067	NaN	NaN	0.172616	-0.158462	0.517024	0.40021	0.00259443	NaN		0	NaN		0	NaN		0	0.0386681		0.0634607	-0.0916761		0	NaN		0	NaN
AIMP2	Aminoacyl tRNA synthase complex-interacting multifunctional protein 2		7	40.3	0	14.838	736050000	NaN	NaN	NaN	NaN	NaN	NaN	NaN	NaN	NaN	NaN	NaN	NaN	0.181548	NaN	NaN	NaN	NaN	NaN	-0.604498	-0.524147	-0.400644	-0.412443	-0.467514	-0.712173		-4.34e-08	0		-4.34e-08	0		0	NaN		0.727948	-0.148984		0	NaN		0	NaN
PRDX4	Peroxiredoxin-4		6	41	0	17.26	3775700000	-0.348905	-0.354723	-0.311435	-0.441752	-0.457237	-0.570871	-0.64697	-0.299063	-0.518866	-0.583182	-0.555079	-0.74664	-0.724325	-0.70776	-0.574627	-0.62901	-0.846869	-0.638771	-0.0525508	0.110631	0.0732718	0.0596321	-0.208378	0.216734		0.971086	-0.151599		0.516676	-0.14		0.184029	-0.0359792		0.267295	-0.0959095	+	4.48082	-0.419532	+	2.58974	0.33055
PAK2	Serine/threonine-protein kinase PAK 2;PAK-2p27;PAK-2p34		3	7.4	0	3.4069	654220000	NaN	NaN	NaN	0.292428	0.577731	0.20989	NaN	NaN	NaN	NaN	NaN	NaN	NaN	NaN	NaN	NaN	NaN	NaN	-0.358417	-0.687939	-0.307109	-0.145781	-0.162315	NaN		0	NaN		-4.34e-08	0		-4.34e-08	0		0.626289	0.237158		0	NaN		-4.34e-08	0
CBX3	Chromobox protein homolog 3		6	49.2	0	22.698	3286300000	-0.000591656	-0.0707393	-0.377163	-0.214408	-0.259047	-0.146947	0.152248	0.00776951	0.377846	0.148348	0.663937	0.245252	0.345056	0.205643	0.253989	-0.0940638	0.275484	0.243181	0.263395	0.10916	0.221692	0.364797	0.299127	0.245739		0.137244	-0.0573021		0.258207	0.173225		0.295322	-0.126695		0.161215	0.0375378	+	1.30197	-0.381381	+	1.56675	-0.417727
PSMD2	26S proteasome non-ATPase regulatory subunit 2		23	33.4	0	94.197	11677000000	-0.783042	-0.955676	-0.667699	-0.196393	-0.130602	-0.197683	-0.495613	-0.561601	-0.612858	-0.348794	-0.318344	-0.214424	-0.314159	-0.0739399	-0.00958238	0.0980152	0.0255958	0.320543	-0.217139	0.0054719	-0.264322	-0.206795	-0.0618724	-0.204582	+	1.57439	0.627246		1.15663	0.262837		1.01977	0.280611		0.0152193	-0.00598272	+	2.27923	-0.646924	+	2.2338	-0.669579
SRSF6	Serine/arginine-rich splicing factor 6		5	24.5	0	23.56	4630800000	-0.105551	-0.218246	-0.28597	-0.0351505	-0.0352243	0.032242	-0.176609	1.01328	0.801655	1.11783	1.08038	0.759326	NaN	0.427284	0.560226	0.812211	0.744936	0.774249	0.608336	0.662661	0.827656	0.558072	0.48656	0.946132		0.931662	0.190545		0.384363	0.439737		0.9117	0.265838		0.00356752	-0.00245375	+	3.14255	-0.886052	+	2.43448	-0.697011
TRIM28	Transcription intermediary factor 1-beta		15	29.2	0	71.559	6130800000	-0.233312	-0.0277044	-0.0413726	-0.0797067	0.0357646	-0.0225369	0.0416635	-0.0922479	-0.050607	-0.0665935	0.0103502	0.0167816	-0.036807	0.0844725	0.0506061	0.0271541	0.156914	0.0576928	-0.0620831	0.0585242	0.0305479	-0.0829121	0.0597706	-0.0200332		0.731169	0.0786365		0.106658	0.0205766		0.83853	0.0478299		0.05468	-0.00950197		0.578425	-0.10285		0.818367	-0.133553
G3BP1	Ras GTPase-activating protein-binding protein 1		5	18.7	0	40.389	2594300000	0.00417777	-0.207244	-0.0909105	-0.339692	-0.329395	0.131721	-0.035313	0.672018	0.0669503	0.744075	0.0097772	0.478402	0.0123541	-0.197732	0.498557	-0.0191412	-0.121926	-0.129229	-0.37458	-0.149841	-0.151218	-0.235773	-0.492342	-0.284335		0.173099	-0.0811296		0.140764	0.1762		0.329819	-0.194492		0.861125	-0.204809		0.528579	0.0809513		0.397959	-0.202385
EIF3I	Eukaryotic translation initiation factor 3 subunit I		8	28	0	16.231	900530000	-1.42105	-0.14535	-0.397087	0.212507	0.409038	-0.35716	-0.410639	-0.151635	NaN	NaN	-0.336318	0.126312	-0.0308403	0.0945064	0.257131	-0.450045	NaN	NaN	0.0441843	0.221073	0.298189	0.130404	-0.222633	0.204266		0.594194	0.742625		0	-0.184684		0	-0.419205		0.454689	-0.207949	+	1.04079	-0.871051	+	0.889644	-0.761429
TARBP1	Probable methyltransferase TARBP1		6	6.4	0	11.519	26400000000	NaN	1.16774	NaN	NaN	NaN	NaN	NaN	NaN	5.57055	NaN	NaN	NaN	NaN	0.234869	1.81672	NaN	NaN	NaN	-0.0783047	NaN	NaN	NaN	-0.278654	NaN		0	NaN		0	NaN		0	NaN		0	NaN		0	NaN		0	0.141947
NNT	NAD(P) transhydrogenase, mitochondrial		26	30	0	122.61	17527000000	0.459222	0.505891	0.599889	0.610322	0.514097	0.538936	0.00388999	-0.163947	-0.113161	-0.049039	0.163241	-0.0733326	-0.0371771	-0.228064	-0.169793	-0.0802404	0.000865329	-0.0868291	-0.502239	-0.490943	-0.335226	-0.492829	-0.367695	-0.529468		0.185802	0.0327843		0.340286	0.104696		0.429075	0.08961		1.11897	-0.0268015	+	3.87267	0.961333	+	3.16818	0.666679
TMED1	Transmembrane emp24 domain-containing protein 1		4	21.1	0	15.853	1016600000	NaN	NaN	NaN	NaN	NaN	NaN	0.20201	NaN	NaN	-0.737952	NaN	NaN	NaN	-1.2193	0.0669503	NaN	NaN	-0.929968	0.103531	-0.692175	-0.357382	-0.748142	-0.25858	-0.774972		-4.34e-08	0		0	-0.939962		0	-0.996918		0.425302	0.289226		0	NaN		0	NaN
PRPF4B	Serine/threonine-protein kinase PRP4 homolog		12	13	0	44.859	2489200000	-0.844665	-0.44902	-1.1007	-0.613189	-0.449257	-0.503302	NaN	1.64782	NaN	1.23714	NaN	NaN	NaN	NaN	NaN	NaN	NaN	1.6947	0.502942	0.752406	0.389457	0.18574	0.514501	0.808014		0.596422	0.276213		0	NaN		0	NaN		0.237677	0.165951	+	2.10308	-1.24066		0	NaN
SERINC3	Serine incorporator 3	+	6	15.1	0	18.473	2369200000	0.759582	0.689925	0.666666	1.62947	1.28913	0.323774	-0.704089	-0.617521	NaN	-0.246139	-0.0659893	-0.0437797	0.141825	0.049352	0.198871	0.840282	0.594262	0.475396	1.91579	0.848958	0.821465	0.919836	1.78002	1.55065		0.38246	0.3754		1.23027	0.504741		1.26412	0.506631	+	1.67326	0.8854		1.75766	-0.158029	+	3.42938	0.575375
SNX1	Sorting nexin-1		8	24.5	0	21.799	5624300000	-0.530822	NaN	0.322851	-0.124204	-1.89964	NaN	-0.185409	-0.0709968	-0.0274103	NaN	-0.0231965	-0.0203404	0.0941009	0.480472	0.150949	-0.495959	-0.251453	NaN	-0.396327	-0.207478	-1.09709	0.280838	-0.39646	-0.153142		0	0.406618		0.390918	0.0274351		1.16713	-0.660993		0.0237063	0.025932		0.140636	0.237256		0.397087	-0.345826
CUL4A	Cullin-4A		6	18.8	0	15.919	757610000	NaN	NaN	NaN	NaN	NaN	0.418676	-0.10149	NaN	NaN	NaN	NaN	-0.352308	NaN	NaN	NaN	NaN	NaN	NaN	NaN	-0.763367	NaN	-0.554994	NaN	NaN		0	NaN		0	NaN		-4.34e-08	0		0	NaN		0	NaN		-4.34e-08	0
CUL4B	Cullin-4B		9	22.8	0	23.6	3342800000	-0.00657921	-0.33061	0.072586	0.0250288	0.346985	0.333424	-0.129324	-0.00153008	0.196607	NaN	-0.415788	0.109829	0.152378	-0.221909	-0.0539729	0.327917	0.231064	1.49856	-0.231464	-0.261293	-0.237507	-0.242516	-0.431949	-0.0680296		0.639451	0.323347		0.433513	-0.250518		0.646025	0.727014		0.00951808	0.003291		0.572193	0.158904		0.103122	-0.0470332
RAB31	Ras-related protein Rab-31		5	27.8	0	7.6407	291190000	NaN	0.188907	NaN	NaN	NaN	NaN	NaN	NaN	NaN	NaN	NaN	NaN	-0.490598	-0.432649	NaN	NaN	NaN	NaN	NaN	NaN	1.44286	NaN	NaN	0.847195		0	NaN		-4.34e-08	0		0	NaN		0	NaN		0	-1.25396		0	0.650531
RAB32	Ras-related protein Rab-32		3	14.2	0	9.1046	443190000	NaN	NaN	NaN	NaN	1.39369	NaN	NaN	NaN	NaN	NaN	NaN	NaN	NaN	NaN	NaN	NaN	NaN	NaN	-0.276188	-0.453636	NaN	-0.474552	0.107688	-0.37062		0	NaN		-4.34e-08	0		-4.34e-08	0		0.788634	0.14069		0	NaN		-4.34e-08	0
DDX39B	Spliceosome RNA helicase DDX39B		5	41.6	0	9.8788	1194200000	-0.245113	-0.419604	-0.180921	-0.425676	NaN	-0.264409	NaN	-0.00319192	NaN	NaN	NaN	-0.0222145	-1.1346	NaN	NaN	NaN	0.0581087	-0.26609	0.0309717	0.391548	0.233643	0.261832	0.190425	0.468427		0.649207	-0.132026		0	NaN		0	NaN		0.138166	-0.0657327	+	2.586	-0.577553		0	0.852725
CKAP5	Cytoskeleton-associated protein 5		6	3.8	0.0044599	1.792	354590000	NaN	NaN	NaN	NaN	NaN	NaN	NaN	NaN	NaN	NaN	NaN	NaN	NaN	NaN	0.00949053	NaN	NaN	NaN	NaN	-0.102434	NaN	NaN	0.00719549	-0.396081		-4.34e-08	0		-4.34e-08	0		0	NaN		0	NaN		0	NaN		0	NaN
COTL1	Coactosin-like protein		5	33.8	0	9.8805	1057900000	-0.141048	-0.191178	0.238542	0.219587	0.208268	-0.0868444	NaN	0.140909	-0.100855	0.0850168	NaN	-0.126391	0.264837	0.0196308	0.115433	0.131458	-0.0676062	0.185613	0.365581	0.389016	0.212507	0.452701	0.550999	0.32458		0.22118	0.144898		0	-0.0255362		0.29995	-0.0501453		0.153402	0.062312	+	1.17201	-0.382636		0.464035	-0.164528
SCARB2	Lysosome membrane protein 2		14	35.4	0	97.759	35302000000	1.14991	0.988557	1.06129	1.16909	1.10916	1.25864	0.0308304	-0.0937251	-0.0452527	-0.0506966	-0.0400815	-0.0068256	0.763667	0.759838	0.756767	0.830823	0.71642	0.754118	2.1527	2.02733	2.27742	1.94024	2.07738	2.05634		0.792382	0.112377		0.0259667	0.00351454		0.0716958	0.00702999		0.0413986	0.0138102	+	3.09583	-1.01508	+	2.55481	0.306496
DAG1	Dystroglycan;Alpha-dystroglycan;Beta-dystroglycan		2	4	0.0044821	1.826	163810000	NaN	NaN	NaN	NaN	NaN	NaN	NaN	NaN	NaN	NaN	NaN	NaN	NaN	-0.298087	-0.0483973	NaN	NaN	NaN	NaN	NaN	NaN	NaN	NaN	NaN		-4.34e-08	0		-4.34e-08	0		0	NaN		-4.34e-08	0		-4.34e-08	0		0	NaN
DSG2	Desmoglein-2		14	15.7	0	38.612	2515600000	1.19352	1.5656	1.36564	1.42514	1.47197	1.24525	1.21915	1.53147	1.90985	1.48104	2.14981	1.22922	0.961253	0.690998	0.965249	1.00007	1.08454	0.633757	1.74395	NaN	1.20257	1.05624	1.36491	1.16794		0.0162156	0.00586792		0.0557769	0.0665332		0.0520076	0.0336232		0.934347	0.137017		0.702799	0.245512	+	1.6316	0.502418
EIF3A	Eukaryotic translation initiation factor 3 subunit A		26	22.7	0	103.25	7100200000	0.215989	0.745108	0.720716	0.34153	0.450591	0.68428	0.30229	0.340847	0.231678	0.416624	1.17409	0.361656	0.0272955	0.259303	0.536948	0.0672257	0.558659	0.0977456	-0.543488	-0.566784	-0.369278	-0.816291	-0.406981	-0.726114		0.199317	-0.0684707		0.570286	0.359184		0.0497451	-0.0333051		0.248235	0.0252566	+	2.21865	1.14472		0.55952	0.286089
TTLL12	Tubulin--tyrosine ligase-like protein 12		8	15.1	0	15.843	1769400000	0.104873	-0.0107883	0.139469	0.267715	-0.155743	0.116498	0.0130691	-0.105675	NaN	NaN	-0.268956	NaN	NaN	0.179384	NaN	-0.161766	0.190172	0.290307	0.137766	0.175557	0.127633	0.00532815	0.280956	0.751806		0.00585449	-0.00169472		0	-0.163281		0	0.0107887		0.45876	0.287337		0.135418	-0.0249878		0	-0.101532
DYNC1H1	Cytoplasmic dynein 1 heavy chain 1		40	10.5	0	75.244	20731000000	0.51662	0.224164	0.41186	0.51652	0.32435	0.40305	0.42503	0.369718	0.0313951	0.541515	-0.0188927	0.220206	-0.357936	0.268315	-0.0680598	NaN	-0.0140625	0.23842	-0.417078	-0.553807	0.00201835	-0.314051	-0.478708	-0.0314004		0.322369	0.0304249		0.0493891	-0.0277714		0.0114604	0.0120514		0.0276514	-0.0204488	+	1.67785	0.672828		1.02452	0.436775
EIF2B1	Translation initiation factor eIF-2B subunit alpha		6	22.6	0	14.436	805130000	0.107286	NaN	NaN	NaN	NaN	NaN	NaN	NaN	NaN	0.0503276	0.176323	0.133169	NaN	NaN	NaN	NaN	NaN	NaN	-0.349952	NaN	NaN	-0.104077	-0.0421003	0.128821		0	NaN		0	NaN		-4.34e-08	0		0	0.232898		0	0.211363		0	NaN
CTTN	Src substrate cortactin		5	10.2	0	4.9182	190180000	NaN	NaN	NaN	NaN	-0.0232844	NaN	NaN	NaN	NaN	NaN	NaN	NaN	NaN	NaN	NaN	NaN	NaN	NaN	NaN	NaN	-0.74802	NaN	-0.682395	-1.06459		0	NaN		-4.34e-08	0		-4.34e-08	0		0	0.0656255		0	NaN		-4.34e-08	0
FLOT2	Flotillin-2	+	17	43.9	0	94.941	8400500000	-0.773072	-0.662049	-0.767806	1.07451	1.24422	1.1143	0.37951	0.439038	1.0633	2.04163	1.79015	1.66689	0.758389	1.05186	0.913186	2.41921	1.97816	2.12012	2.19131	0.673376	0.513188	0.685985	1.43653	1.87959	+	4.08532	1.87865	+	1.20994	1.20561	+	1.56133	1.26469	+	1.70917	1.21163	+	4.47386	-1.35849	+	4.23451	-1.64212
TRIM25	E3 ubiquitin/ISG15 ligase TRIM25		2	4.4	0	7.3583	483230000	0.442652	0.550113	NaN	NaN	NaN	NaN	NaN	NaN	NaN	NaN	NaN	NaN	NaN	NaN	NaN	NaN	NaN	NaN	NaN	NaN	-0.322036	0.337882	0.266157	NaN		0	NaN		-4.34e-08	0		-4.34e-08	0		0	0.588193		0.550592	0.488459		0	NaN
FKBP8	Peptidyl-prolyl cis-trans isomerase FKBP8	+	6	20.6	0	39.974	1081500000	NaN	NaN	NaN	NaN	NaN	NaN	NaN	NaN	NaN	NaN	NaN	NaN	NaN	NaN	NaN	NaN	NaN	-0.518598	NaN	NaN	-0.1922	-0.143867	0.223917	NaN		-4.34e-08	0		-4.34e-08	0		0	NaN		0	0.416117		0	NaN		-4.34e-08	0
PDE3A	cGMP-inhibited 3,5-cyclic phosphodiesterase A		4	4.5	0	9.6047	1920600000	-1.56854	-0.298176	NaN	NaN	-1.78071	NaN	-0.724468	NaN	NaN	-1.48068	-0.631288	NaN	-0.111633	-0.121298	NaN	NaN	NaN	NaN	-0.00342325	-0.099309	-0.712031	-0.836269	-0.343897	NaN		0	-1.48253		0	-0.756211		0	NaN		0.471356	0.23201		0.267461	-0.384153		0.485166	-0.816891
CAPRIN1	Caprin-1		8	17.3	0	23.871	2156700000	-0.808791	-0.462714	-0.190141	0.550901	-0.515253	-0.180119	NaN	0.104873	0.333195	NaN	NaN	NaN	NaN	0.393636	-0.61803	0.228973	NaN	1.0588	-0.680359	-0.637154	-0.153318	-0.463927	-0.863074	-0.486065		0.355428	0.439058		0	NaN		0	1.67683		0.430665	-0.258366		0.109472	-0.0690821		0.338457	-0.375018
RBM39	RNA-binding protein 39		22	53.2	0	201.55	23088000000	-0.416905	-0.447288	-0.688427	-0.261258	-0.209628	-0.199173	0.66339	1.08168	1.02489	1.50243	1.16768	1.10635	0.712904	0.434668	0.480575	0.323543	0.754973	0.593402	0.576861	0.392097	0.418352	0.374622	0.391108	0.659742		1.00283	0.294187		0.502766	0.335501		0.0217796	0.01459		0.601686	0.147546	+	3.33404	-0.912564	+	3.02049	-1.06026
MCM6	DNA replication licensing factor MCM6		17	21.4	0	29.401	3678500000	0.0177795	0.295605	0.253868	0.218967	0.0651587	0.140255	0.285106	0.231187	0.594835	0.0854246	0.0333701	0.378956	0.342213	0.198243	-0.448371	0.214995	0.194591	0.286172	0.0255958	0.10165	0.1153	0.111432	0.0478175	0.0357646		0.126548	-0.047624		3.10458	-0.204459		0.273698	0.201224		2.8356	-0.0730679		0.387377	0.0796238		0.242204	0.158389
GANAB	Neutral alpha-glucosidase AB		33	37.6	0	165.71	22550000000	-0.0250449	-0.0371031	0.015212	-0.114644	-0.135443	-0.0430363	-0.433721	-0.329558	-0.384301	-0.389149	-0.39244	-0.435671	-0.442771	-0.532658	-0.528199	-0.486833	-0.333516	-0.476057	0.15782	0.197362	0.141171	0.147697	0.093425	0.163628		1.67165	-0.0820627		0.247429	-0.0232264		0.364831	0.0690742		0.448121	-0.0237862	+	2.76685	-0.177722	+	3.89312	0.485564
MFSD10	Major facilitator superfamily domain-containing protein 10		2	4.8	0	17.429	1030800000	NaN	NaN	NaN	NaN	NaN	NaN	NaN	NaN	0.412294	NaN	NaN	NaN	NaN	NaN	NaN	0.164529	NaN	NaN	-0.19512	-0.0471148	NaN	NaN	-0.126848	0.0319598		-4.34e-08	0		0	NaN		0	NaN		0	-0.148006		0	NaN		-4.34e-08	0
LBR	Lamin-B receptor		13	23.3	0	85.263	9480300000	1.67396	1.66939	1.67699	1.6277	0.840282	1.80595	1.26225	1.10152	1.41435	1.35344	1.50284	1.43691	0.999278	1.25701	0.95293	1.11956	1.21095	1.0292	-1.77177	-1.99833	-1.93981	-2.08418	-1.76474	-1.95003		0.312299	-0.248803		0.555142	0.171688		0.377221	0.0501639		1.66386	0.178594	+	6.9938	3.68089	+	2.50933	0.603708
PTGR1	Prostaglandin reductase 1		8	32.2	0	10.713	707520000	NaN	1.32187	NaN	NaN	NaN	NaN	NaN	NaN	NaN	NaN	NaN	NaN	NaN	0.87523	NaN	NaN	NaN	NaN	-0.224688	-0.266958	-0.0738487	-0.227135	-0.105272	-0.334716		0	NaN		-4.34e-08	0		0	NaN		0.272668	-0.0322448		0	1.51118		0	0.446641
KPNB1	Importin subunit beta-1		29	49.4	0	304.39	102230000000	0.32008	0.210264	0.374511	0.206143	0.267596	0.300065	0.224534	0.190172	0.269871	0.154454	0.153935	0.136585	0.206518	0.156008	0.126709	0.136716	0.222928	0.234133	-0.033348	-0.0203404	-0.0608938	-0.0589237	-0.0375768	-0.0654911		0.31187	-0.0436838		0.971206	-0.079868		0.234777	0.0348477		0.0355403	0.00124735	+	2.64893	0.348338		1.21375	0.13854
GAPVD1	GTPase-activating protein and VPS9 domain-containing protein 1		6	4.9	0	10.665	557320000	NaN	NaN	NaN	0.0411028	NaN	NaN	-0.186672	0.242084	NaN	NaN	NaN	NaN	NaN	-0.00372694	NaN	-0.450696	NaN	NaN	-0.836244	-0.346757	-0.174996	-0.401959	-0.359083	-0.781504		0	NaN		0	NaN		0	NaN		1.2288	-0.35104		0	NaN		0	NaN
[truncated: 365 more rows]
[truncated: 3 more columns]
