# Supplementary material for: Discovery of lipid-mediated protein-protein interactions in living cells using metabolic labeling with photoactivatable clickable probes
Source: bioRxiv preprint, doi:10.1101/2021.12.15.472799, version 1 (2021-12-15)
Supplement: Supplementary Table S4 [file 472799_file06.xlsx]

## Sheet: Normalised enrichment
							ABL1			FSP1			ARF1			ARL17B			BASP1			CHP1			DDX46			FAM49B			GNAI2			GNAI3			mCitrine			NCS1			HIV NEF1			NOL3			GNAO1
Gene names	Protein names	Myristoylated	Unique peptides	Sequence coverage [%]	Score	Intensity	Replicate 1	Replicate 2	Replicate 3	Replicate 1	Replicate 2	Replicate 3	Replicate 1	Replicate 2	Replicate 3	Replicate 1	Replicate 2	Replicate 3	Replicate 1	Replicate 2	Replicate 3	Replicate 1	Replicate 2	Replicate 3	Replicate 1	Replicate 2	Replicate 3	Replicate 1	Replicate 2	Replicate 3	Replicate 1	Replicate 2	Replicate 3	Replicate 1	Replicate 2	Replicate 3	Replicate 1	Replicate 2	Replicate 3	Replicate 1	Replicate 2	Replicate 3	Replicate 1	Replicate 2	Replicate 3	Replicate 1	Replicate 2	Replicate 3	Replicate 1
ILVBL	Acetolactate synthase-like protein		2	6.3	13.009	32173000	NaN	NaN	NaN	-2.84074	-2.62697	NaN	NaN	NaN	NaN	NaN	-3.65347	NaN	NaN	NaN	NaN	NaN	NaN	NaN	NaN	NaN	NaN	NaN	NaN	NaN	NaN	NaN	NaN	NaN	-3.60014	-3.04305	NaN	NaN	NaN	NaN	NaN	NaN	NaN	NaN	NaN	NaN	NaN	NaN	NaN
SMCHD1	Structural maintenance of chromosomes flexible hinge domain-containing protein 1		2	1.6	15.811	33697000	NaN	NaN	NaN	NaN	-1.51921	-2.50883	NaN	-2.64247	-2.584	NaN	NaN	NaN	NaN	NaN	NaN	NaN	NaN	NaN	NaN	NaN	NaN	NaN	NaN	NaN	NaN	NaN	-2.46263	-3.16315	-2.75305	NaN	NaN	NaN	NaN	NaN	NaN	NaN	NaN	NaN	NaN	NaN	NaN	NaN	NaN
NUDT19	Nucleoside diphosphate-linked moiety X motif 19, mitochondrial		2	8	13.185	38798000	NaN	NaN	NaN	NaN	-1.51493	-2.51786	NaN	NaN	NaN	NaN	NaN	NaN	NaN	NaN	NaN	NaN	NaN	NaN	NaN	NaN	NaN	NaN	NaN	-3.51358	NaN	-3.52199	-2.63268	NaN	-2.74581	-3.0617	NaN	NaN	NaN	NaN	NaN	NaN	NaN	NaN	NaN	NaN	NaN	NaN	-3.17566
NACA	Nascent polypeptide-associated complex subunit alpha, muscle-specific form;Nascent polypeptide-associated complex subunit alpha		5	44.1	101.94	856320000	0.734625	-0.210241	0.780985	2.47573	1.05252	0.823675	1.80796	1.45508	2.05529	-0.29178	-0.483213	NaN	NaN	NaN	NaN	NaN	NaN	NaN	2.46235	0.760624	1.71927	0.990116	-1.04222	0.286861	-0.570202	0.997665	0.292288	1.12075	0.0343857	0.681313	NaN	-0.64208	0.688751	-1.56646	-1.18007	-1.00293	NaN	NaN	NaN	-1.56828	-2.13076	-1.83938	1.4376
DDX39A	ATP-dependent RNA helicase DDX39A		1	23	7.6789	63078000	NaN	NaN	NaN	-0.110907	-1.2717	-1.33366	-2.40616	NaN	-2.04748	NaN	NaN	NaN	NaN	NaN	NaN	NaN	NaN	NaN	-1.5259	NaN	NaN	-0.854626	-1.61266	-2.416	NaN	NaN	NaN	-2.32757	NaN	-1.32708	NaN	NaN	NaN	NaN	NaN	NaN	NaN	NaN	NaN	NaN	NaN	NaN	-1.15551
ACOT7	Cytosolic acyl coenzyme A thioester hydrolase		6	34.6	47.191	517830000	-0.636892	-0.236433	0.76886	0.78059	1.67523	1.68303	-0.0676765	0.442394	0.601147	-0.901306	-1.80291	-0.573139	NaN	NaN	NaN	NaN	-1.40266	NaN	0.766846	-0.214697	0.978373	-0.477406	-1.18149	-0.671526	NaN	-0.857243	0.86046	-0.77322	0.300186	0.500021	NaN	-0.601048	-0.00555038	NaN	-2.03491	NaN	NaN	NaN	NaN	-1.57151	NaN	NaN	-1.11208
SUPT5H	Transcription elongation factor SPT5		6	9.3	49.347	308090000	0.353056	NaN	-0.287769	-0.585564	0.152702	0.203056	-0.666521	-0.692854	-0.0193176	NaN	-0.33877	NaN	NaN	NaN	NaN	NaN	NaN	NaN	-1.0089	-0.309553	-1.83128	NaN	-0.597561	NaN	NaN	NaN	-0.778339	-0.874451	-0.396843	-0.531332	NaN	NaN	-0.462259	NaN	-0.689423	NaN	-0.866266	NaN	NaN	NaN	NaN	NaN	-0.989933
CLIC1	Chloride intracellular channel protein 1;Chloride intracellular channel protein		6	31.1	62.121	256350000	NaN	0.0805874	NaN	0.00886536	-1.9512	-0.527706	-0.588379	-0.990557	-0.187004	NaN	NaN	NaN	NaN	NaN	NaN	NaN	NaN	NaN	0.476795	-2.64174	NaN	NaN	NaN	NaN	NaN	-1.92703	-2.16875	-0.547108	-0.211296	-0.937395	NaN	NaN	-1.09686	NaN	NaN	NaN	-2.56059	NaN	NaN	NaN	NaN	NaN	3.62512
IGF2BP3	Insulin-like growth factor 2 mRNA-binding protein 3		2	6.9	11.739	48438000	-2.82941	NaN	-3.3198	NaN	NaN	NaN	-2.80417	-2.25949	-1.18121	NaN	NaN	NaN	NaN	NaN	NaN	NaN	NaN	NaN	-2.92301	-3.06895	-3.29794	NaN	NaN	NaN	NaN	NaN	NaN	NaN	NaN	NaN	NaN	NaN	-2.78843	NaN	NaN	NaN	-2.8497	-3.04067	NaN	NaN	NaN	NaN	NaN
RTCA	RNA 3'-terminal phosphate cyclase		2	9.3	12.931	13061000	NaN	NaN	NaN	-3.00447	-3.68707	-3.1306	NaN	NaN	NaN	NaN	NaN	NaN	NaN	NaN	NaN	NaN	NaN	NaN	NaN	NaN	NaN	NaN	NaN	NaN	NaN	NaN	NaN	-3.32544	-3.67504	-3.326	NaN	NaN	NaN	NaN	NaN	NaN	NaN	NaN	NaN	NaN	NaN	NaN	-3.28467
HMGN4	High mobility group nucleosome-binding domain-containing protein 4		6	37.8	323.31	41237000000	6.6762	6.16028	5.5156	5.23985	5.55522	5.86423	6.77804	6.34724	5.60112	6.82823	7.41676	7.0745	5.42378	7.21654	5.18861	6.88331	6.6777	7.34098	5.57113	5.92616	5.84346	7.02468	7.27502	7.14979	7.42319	6.98237	7.07703	5.42422	6.00411	6.87422	6.11662	7.19206	6.55181	7.97908	7.22182	6.49661	7.25882	7.56063	7.82944	6.6771	7.03388	7.34434	5.48514
PSMD14	26S proteasome non-ATPase regulatory subunit 14		2	12.6	21.224	70082000	NaN	NaN	-2.16875	-1.69643	-1.84603	-1.5936	NaN	-1.66908	-1.5605	NaN	NaN	NaN	NaN	NaN	NaN	NaN	NaN	NaN	NaN	-2.1291	NaN	NaN	NaN	NaN	NaN	NaN	-0.912592	-1.88213	-1.7939	-2.02079	NaN	NaN	-1.34506	NaN	NaN	NaN	NaN	NaN	NaN	NaN	NaN	NaN	-1.42225
NOP56	Nucleolar protein 56		14	30.3	156.96	3288000000	2.71128	2.66562	1.03455	2.24043	2.07091	1.85269	2.60859	2.41861	0.555986	3.7878	4.44398	3.57652	1.35418	3.0076	0.686125	3.19679	3.49458	3.11977	1.95162	2.55861	1.15093	3.64386	4.13894	3.12195	3.50932	2.59598	2.17832	2.03716	2.83385	3.27301	2.67475	3.43555	0.387405	2.83119	3.566	3.426	3.28184	3.32515	2.74666	2.55583	3.6342	3.97405	1.81755
DDX3X	ATP-dependent RNA helicase DDX3X		17	37	138.68	1427200000	0.408638	-1.88222	1.16743	0.508583	1.93602	0.701836	1.76643	2.87969	3.05404	-1.38216	-1.12588	-0.219236	-2.71017	-0.996529	-2.87399	-1.62992	-2.1366	NaN	1.88521	1.25403	0.967396	0.458549	-0.0871983	-1.83741	-0.172565	1.55582	2.87983	1.252	1.79233	2.09346	-1.26247	0.166059	1.9707	0.353634	0.239632	-0.0521202	-0.276619	-0.901438	-1.32375	2.5053	-0.551199	-0.911425	2.82891
PPP6C	Serine/threonine-protein phosphatase 6 catalytic subunit;Serine/threonine-protein phosphatase 6 catalytic subunit, N-terminally processed;Serine/threonine-protein phosphatase;Serine/threonine-protein phosphatase		1	4.6	6.5139	29189000	NaN	NaN	-3.2372	-2.55124	-1.82204	-2.71923	NaN	NaN	-3.29774	NaN	NaN	NaN	NaN	NaN	NaN	NaN	NaN	NaN	NaN	NaN	NaN	NaN	NaN	NaN	NaN	NaN	NaN	-2.37463	-2.73657	-3.10068	NaN	NaN	NaN	NaN	NaN	NaN	NaN	NaN	NaN	NaN	NaN	NaN	-3.15259
PDXK	Pyridoxal kinase		1	8.8	7.3605	38175000	NaN	NaN	NaN	NaN	-2.18874	-1.74909	NaN	-2.10959	-1.22064	NaN	NaN	NaN	NaN	NaN	NaN	NaN	NaN	NaN	NaN	NaN	NaN	NaN	NaN	NaN	NaN	NaN	-2.1022	-2.20151	-1.96897	NaN	NaN	NaN	NaN	NaN	NaN	NaN	NaN	NaN	NaN	NaN	NaN	NaN	-2.199
AP3D			1	2	14.478	183660000	NaN	NaN	-1.92862	-1.75908	-1.63099	-2.58568	NaN	NaN	NaN	-1.96126	1.52211	-2.25132	NaN	-1.57633	NaN	-1.41263	-1.30135	-2.69381	NaN	0.355246	NaN	-1.89255	1.48531	-1.89711	-2.18858	-2.0018	NaN	-2.25364	0.175447	-2.38795	NaN	NaN	NaN	-2.53366	-1.23738	NaN	NaN	-3.29443	NaN	-2.55423	-1.29498	NaN	NaN
IRS4	Insulin receptor substrate 4		2	4.9	12.302	40483000	NaN	NaN	NaN	NaN	-1.83579	NaN	NaN	NaN	-2.56483	-1.44955	-1.64755	NaN	NaN	NaN	NaN	NaN	NaN	NaN	-2.16109	NaN	NaN	NaN	NaN	NaN	NaN	NaN	NaN	NaN	-1.91781	NaN	NaN	NaN	NaN	NaN	-0.436796	NaN	NaN	NaN	NaN	NaN	NaN	NaN	NaN
PRMT5	Protein arginine N-methyltransferase 5;Protein arginine N-methyltransferase 5, N-terminally processed		4	7.7	23.725	92412000	NaN	NaN	-1.47609	NaN	-1.76875	-1.87422	NaN	-2.03709	-1.78859	NaN	NaN	NaN	NaN	NaN	NaN	NaN	NaN	NaN	-1.4612	NaN	-1.65867	NaN	NaN	NaN	NaN	NaN	NaN	NaN	NaN	NaN	NaN	NaN	-2.2892	NaN	NaN	NaN	NaN	NaN	NaN	NaN	NaN	NaN	NaN
PSMA7	Proteasome subunit alpha type-7;Proteasome subunit alpha type		3	22.5	20.802	210100000	-1.31394	NaN	-1.5118	-1.14845	-1.39966	-1.13618	-0.853813	0.117392	0.271244	-1.31508	NaN	NaN	NaN	NaN	NaN	NaN	NaN	NaN	0.010458	-1.24479	-1.10912	-1.9632	-1.77375	NaN	-1.44123	-1.42175	-0.827389	-0.884626	-1.80289	-1.51192	NaN	NaN	-0.615673	NaN	-1.5909	NaN	-1.10764	-1.53635	NaN	-2.00189	NaN	-2.42396	0.742901
HAT1	Histone acetyltransferase type B catalytic subunit		1	3.9	6.4266	28746000	NaN	NaN	NaN	-1.96128	-1.59527	-1.6234	NaN	NaN	NaN	NaN	NaN	NaN	NaN	NaN	NaN	NaN	NaN	NaN	NaN	NaN	NaN	NaN	NaN	-2.2229	NaN	NaN	NaN	NaN	-1.97234	NaN	NaN	NaN	NaN	NaN	-1.63571	NaN	NaN	NaN	NaN	NaN	NaN	NaN	NaN
U2SURP	U2 snRNP-associated SURP motif-containing protein		26	35.2	300.62	9101700000	4.30667	4.03164	4.32288	3.70077	3.47409	3.71533	3.9543	3.05619	2.49962	5.27565	4.95219	4.82758	3.11856	3.69726	1.82119	5.06732	4.90938	4.38927	3.36918	3.566	3.50065	5.16665	4.78022	5.29349	5.88074	4.11288	3.63709	3.97358	4.11492	3.92365	4.90442	4.13607	3.35801	4.70333	4.63762	5.2248	4.7562	4.5038	3.84535	4.37692	4.92658	5.05221	3.7835
PFAS	Phosphoribosylformylglycinamidine synthase		2	2.3	13.323	25703000	NaN	-2.86559	NaN	NaN	-2.40214	-2.33325	NaN	NaN	NaN	-2.61382	NaN	NaN	NaN	NaN	NaN	NaN	NaN	NaN	NaN	NaN	NaN	NaN	NaN	NaN	NaN	NaN	NaN	-2.97759	NaN	-2.38968	NaN	NaN	NaN	NaN	NaN	NaN	NaN	NaN	NaN	NaN	NaN	NaN	-2.23063
SCAMP2	Secretory carrier-associated membrane protein 2		2	7.6	12.497	126550000	NaN	NaN	NaN	-0.630686	-1.07997	-0.362495	-1.85813	-1.50033	-1.38731	NaN	NaN	NaN	NaN	NaN	NaN	NaN	NaN	NaN	0.055687	NaN	-1.8233	-1.31296	-2.35379	NaN	NaN	-2.02326	-1.80196	-2.21821	-2.61431	NaN	NaN	NaN	-1.25946	NaN	NaN	NaN	NaN	NaN	NaN	NaN	NaN	NaN	-1.81859
ARPC2	Actin-related protein 2/3 complex subunit 2		4	21.7	42.227	165520000	NaN	NaN	-1.58961	-0.774033	0.350704	-0.646561	-1.64012	-1.81147	-0.797615	NaN	NaN	NaN	NaN	NaN	NaN	NaN	NaN	NaN	-0.907597	-1.54311	-1.84733	NaN	NaN	NaN	NaN	NaN	-1.10568	-0.666468	-0.854088	NaN	NaN	NaN	NaN	NaN	NaN	NaN	NaN	NaN	NaN	NaN	NaN	NaN	-0.421015
MRPS12	28S ribosomal protein S12, mitochondrial		1	18.1	7.5621	48000000	NaN	NaN	NaN	NaN	-1.89183	NaN	NaN	NaN	NaN	NaN	NaN	NaN	NaN	NaN	NaN	NaN	NaN	NaN	NaN	NaN	NaN	NaN	NaN	NaN	NaN	NaN	NaN	NaN	-1.52611	-1.48044	NaN	NaN	NaN	NaN	NaN	NaN	NaN	NaN	NaN	NaN	NaN	NaN	NaN
SURF4	Surfeit locus protein 4		1	14.1	31.863	114690000	NaN	NaN	NaN	NaN	0.553436	-1.75788	NaN	NaN	NaN	NaN	-2.27878	NaN	NaN	NaN	NaN	NaN	NaN	NaN	-0.959337	NaN	NaN	NaN	-1.30256	NaN	NaN	-2.06547	-1.13124	NaN	-1.80281	NaN	NaN	NaN	NaN	NaN	NaN	NaN	NaN	NaN	NaN	NaN	NaN	NaN	NaN
PPM1G	Protein phosphatase 1G	+	3	5.9	16.581	51882000	NaN	NaN	NaN	NaN	NaN	NaN	NaN	-2.55687	-1.80363	NaN	NaN	NaN	NaN	NaN	NaN	NaN	-1.07184	NaN	NaN	NaN	NaN	NaN	-1.23937	NaN	NaN	NaN	NaN	-1.86246	-1.98845	NaN	NaN	NaN	NaN	-1.14175	-0.811398	-0.983757	NaN	NaN	NaN	-1.34687	NaN	-0.993353	0.157709
EIF3D	Eukaryotic translation initiation factor 3 subunit D;Eukaryotic translation initiation factor 3 subunit D		5	15.4	47.772	294490000	-1.00218	-1.50318	-1.2104	-1.11702	0.847721	0.376253	NaN	-1.30216	-1.16723	NaN	-1.67553	NaN	NaN	NaN	NaN	-0.290125	-2.44036	NaN	-1.49104	-1.77708	-1.54611	-1.68993	-1.95399	-1.52029	NaN	NaN	-0.972479	-1.33647	-1.50959	-0.937817	NaN	-1.34068	-0.612631	-0.826014	NaN	NaN	NaN	NaN	NaN	NaN	NaN	NaN	0.399519
EIF3H	Eukaryotic translation initiation factor 3 subunit H;Eukaryotic translation initiation factor 3 subunit H;Eukaryotic translation initiation factor 3 subunit H;Eukaryotic translation initiation factor 3 subunit H		2	43.5	51.442	300710000	NaN	NaN	NaN	1.19121	-0.0611172	NaN	-0.341915	0.0631084	1.35431	NaN	-0.727798	NaN	NaN	NaN	NaN	NaN	NaN	NaN	0.429449	-1.36117	NaN	NaN	NaN	NaN	NaN	0	-0.00802612	NaN	-1.15519	-0.271746	-2.73098	NaN	1.91419	NaN	NaN	NaN	-1.24369	-1.22665	NaN	NaN	NaN	-1.76661	0.0690327
DHX15	Pre-mRNA-splicing factor ATP-dependent RNA helicase DHX15		6	8.6	51.274	199520000	-1.76858	-1.24311	-1.10086	-0.975161	-0.653566	-0.945925	-1.24785	-0.880806	-0.522324	NaN	NaN	NaN	NaN	-2.44283	NaN	NaN	NaN	NaN	0.0532379	-1.47944	-0.168356	NaN	NaN	NaN	NaN	NaN	-0.543884	-1.02409	-0.480259	-1.02685	NaN	-2.33704	-1.16436	-0.963844	NaN	NaN	NaN	NaN	NaN	NaN	NaN	NaN	-2.12417
PRPF4	U4/U6 small nuclear ribonucleoprotein Prp4		2	4.6	11.037	29721000	NaN	NaN	NaN	NaN	-2.26915	-2.20277	NaN	NaN	NaN	NaN	NaN	NaN	NaN	NaN	NaN	NaN	NaN	NaN	NaN	NaN	NaN	NaN	NaN	NaN	NaN	NaN	NaN	-1.94646	-2.88291	NaN	NaN	NaN	NaN	NaN	NaN	NaN	NaN	NaN	NaN	NaN	NaN	NaN	NaN
PSMD3	26S proteasome non-ATPase regulatory subunit 3		7	19.5	73.166	316070000	-1.30891	NaN	-0.320724	0.830532	1.22706	0.247841	NaN	-0.279234	0.866003	NaN	NaN	NaN	NaN	NaN	NaN	NaN	NaN	NaN	0.836775	NaN	-0.558058	NaN	NaN	NaN	NaN	NaN	-0.212049	-0.290522	-0.290211	-1.69962	NaN	NaN	-1.27323	NaN	NaN	NaN	NaN	NaN	NaN	NaN	NaN	NaN	-1.10743
SART1	U4/U6.U5 tri-snRNP-associated protein 1		3	31.7	57.749	621040000	0.633619	1.10113	-0.989155	-0.444363	-0.916584	-1.26392	0.675804	1.12403	-1.20738	NaN	2.44836	-0.0367661	0.981117	1.01276	NaN	-0.126846	0.741034	-0.194662	-0.731382	0.579866	-0.291416	1.25717	1.66582	0.327068	0.888803	1.3541	-0.433844	NaN	-1.64258	-1.33385	0.137901	0.995701	-0.262718	0.433081	0.938318	0.521685	1.42362	0.577747	-0.185217	-0.429417	0.460234	1.91994	-0.190895
HNRNPR	Heterogeneous nuclear ribonucleoprotein R		2	5.5	14.118	106680000	NaN	-1.75097	-0.512018	NaN	-1.44823	-1.37946	-1.34165	NaN	NaN	-1.46923	-0.952574	-0.717232	NaN	NaN	-2.30189	-1.90657	-1.70202	-1.50434	NaN	NaN	NaN	-1.79193	-1.72166	-1.00192	-1.64484	-1.96216	-1.28819	-1.64056	-0.761976	-1.02954	NaN	NaN	NaN	-1.28244	-1.04131	NaN	NaN	NaN	NaN	NaN	-1.19177	NaN	-1.55569
TXNL1	Thioredoxin-like protein 1		5	25.6	47.395	361230000	-1.21766	-1.25489	-2.84057	-0.0372467	0.914591	0.456659	-1.08327	-1.79551	1.28585	NaN	-2.85787	NaN	NaN	NaN	NaN	-2.55203	NaN	NaN	1.20691	-1.58229	-0.710377	NaN	NaN	NaN	NaN	-1.46493	-1.21103	-1.22418	-1.48409	-0.42951	NaN	NaN	-1.4085	NaN	NaN	NaN	-3.32163	NaN	NaN	NaN	NaN	NaN	2.76064
TIMM44	Mitochondrial import inner membrane translocase subunit TIM44		3	14.3	17.032	22763000	NaN	NaN	NaN	-1.48364	-2.24561	-2.47429	NaN	NaN	NaN	NaN	NaN	NaN	NaN	NaN	NaN	NaN	NaN	NaN	NaN	NaN	NaN	NaN	NaN	NaN	NaN	NaN	NaN	-2.0879	NaN	NaN	NaN	NaN	NaN	NaN	NaN	NaN	NaN	NaN	NaN	NaN	NaN	NaN	-2.52712
PLRG1	Pleiotropic regulator 1		1	2.2	6.4662	26365000	NaN	-3.56942	-2.73783	NaN	-3.26487	-2.44006	NaN	NaN	-3.53949	NaN	NaN	NaN	NaN	NaN	NaN	NaN	NaN	NaN	-3.19211	-3.46947	-3.46297	NaN	NaN	NaN	NaN	NaN	-2.79886	NaN	NaN	-2.54998	NaN	NaN	NaN	NaN	NaN	NaN	NaN	NaN	NaN	NaN	NaN	NaN	NaN
ZNF207	BUB3-interacting and GLEBS motif-containing protein ZNF207		2	4.1	11.842	151640000	NaN	NaN	NaN	-1.98969	-1.90474	-1.30605	NaN	-1.3661	-1.50378	-0.354845	-1.42817	-1.36815	NaN	NaN	-2.68244	0.00468826	-1.93114	-1.25898	-1.75319	-1.10338	NaN	-1.00219	-2.06448	-0.967041	-0.7094	NaN	NaN	-1.17017	-1.2553	-1.72311	NaN	NaN	-1.57084	0.462904	-1.0952	-1.34591	-0.599144	-1.00982	-1.9537	-1.5825	0.360703	-0.829159	-2.00653
BUB3	Mitotic checkpoint protein BUB3		8	38.1	81.244	562510000	-0.178743	NaN	-0.279102	0.731884	1.68567	1.09596	0.585535	1.18306	2.01516	NaN	-0.75152	-1.7324	NaN	NaN	NaN	NaN	NaN	NaN	0.638958	-1.36062	0.182709	-1.09815	-1.45064	NaN	NaN	NaN	0.555515	0.156569	0.130127	0.385059	NaN	NaN	-0.363401	NaN	NaN	NaN	NaN	NaN	NaN	NaN	NaN	NaN	-0.0309944
NARS	Asparagine--tRNA ligase, cytoplasmic		5	14.4	45.655	301200000	-0.672132	-1.54799	0.100441	-0.572205	-0.00845146	0.785286	-1.06779	-0.802401	0.815039	-0.846003	NaN	NaN	NaN	NaN	NaN	NaN	NaN	NaN	-0.0984325	-1.46565	-1.32219	NaN	-1.80167	-1.06023	NaN	-1.48914	-0.720444	-0.389212	-1.12131	-0.48929	NaN	NaN	-0.387424	-1.34707	-1.1408	NaN	NaN	NaN	NaN	NaN	NaN	NaN	-1.06155
PRPSAP2	Phosphoribosyl pyrophosphate synthase-associated protein 2		4	22.8	26.492	60513000	NaN	NaN	NaN	-2.25047	-2.47044	-2.34086	NaN	NaN	-1.78957	NaN	NaN	NaN	NaN	NaN	NaN	NaN	NaN	NaN	-1.9276	NaN	NaN	NaN	NaN	NaN	NaN	NaN	-1.53715	-2.4336	-2.24231	-1.51302	NaN	NaN	NaN	NaN	NaN	NaN	NaN	NaN	NaN	NaN	NaN	NaN	-2.13929
SMCA5			2	1.9	12.126	51592000	NaN	NaN	NaN	NaN	-3.26305	-2.55937	-1.54631	0	-2.45582	-3.54267	NaN	NaN	NaN	NaN	NaN	NaN	NaN	NaN	-2.57159	NaN	NaN	NaN	NaN	NaN	-5.11467	-2.20664	-4.20246	NaN	-4.01454	NaN	NaN	NaN	NaN	NaN	NaN	NaN	NaN	-1.27893	NaN	NaN	NaN	NaN	-1.97148
CCNT1	Cyclin-T1		2	4.7	13.931	81557000	NaN	NaN	-1.67951	NaN	-1.6981	NaN	NaN	NaN	NaN	-2.16184	0.706303	-2.31547	NaN	NaN	NaN	NaN	-1.07184	NaN	NaN	NaN	-1.91205	NaN	-0.790543	NaN	NaN	NaN	NaN	NaN	-1.8145	NaN	NaN	-1.74414	NaN	NaN	-0.444538	NaN	-0.934	NaN	NaN	NaN	-2.37609	NaN	NaN
CCNT2	Cyclin-T2		2	4.7	16.48	128770000	NaN	-0.429762	-0.990885	NaN	-2.00552	NaN	-1.1035	-0.860371	NaN	NaN	0.654638	NaN	NaN	NaN	NaN	NaN	NaN	NaN	NaN	-0.264585	-1.74657	NaN	0.473911	-1.01148	NaN	0.198217	NaN	NaN	NaN	NaN	-0.857779	0.313093	NaN	NaN	0.38833	NaN	0.463263	NaN	0.19665	NaN	NaN	NaN	NaN
H2BFS	Histone H2B type F-S		0	63.5	6.8869	725150000	0.347189	0.272308	-2.55148	-0.0522976	0.964382	-0.568604	0.667562	1.42963	1.38759	1.23443	3.04022	-4.69468	0.936518	1.5923	-0.0171261	NaN	-0.38167	NaN	-3.1517	-0.468218	-1.78648	NaN	2.11511	NaN	0.252514	1.40664	0.457609	-0.783762	0.458483	1.2388	0.0599041	1.26406	1.76898	0.860012	1.79138	-0.529589	1.06879	2.53685	2.87115	0.847445	0.472359	NaN	-2.21693
DKC1	H/ACA ribonucleoprotein complex subunit 4		4	8	36.003	522150000	-0.247879	-0.286575	0.169119	0.308867	-0.686012	0.163048	0.0235634	-0.414185	-0.730206	0.895901	1.24253	1.08627	0.881136	0.48867	-0.137592	-0.250839	-0.0797672	0.117025	-0.698446	0.599276	-0.188684	-0.28875	1.05461	0.0368195	1.17085	0.661446	0.239136	-0.485514	0.207867	0.302694	-0.364435	-0.0383778	-0.939907	-0.378176	0.441748	-0.0167103	0.777666	0.47146	0.767181	-0.908503	-0.328243	0.345804	-1.17831
EIF5B	Eukaryotic translation initiation factor 5B		7	6.6	55.408	1264700000	0.300741	1.56712	-0.729208	-0.971054	1.73184	-0.246063	0.0963268	0.086853	-1.11706	1.04688	3.80183	1.55233	-1.315	0.429449	-1.96718	0.856611	0.135784	0.00502205	0.413568	3.05833	1.66191	0.483578	4.06963	0.630436	-0.0686359	1.91482	-0.136061	-0.61278	1.60118	-0.00247574	0.204523	-0.334387	-1.13447	0.581831	2.27234	2.32931	0.0686283	0.341209	0	-0.0717869	1.5195	0.170139	-0.880533
EDF1	Endothelial differentiation-related factor 1		6	41.9	45.802	869500000	1.11373	1.09453	0.592855	-1.17844	0.495474	0.10173	0.13693	-0.416058	-0.845814	2.17841	2.2201	1.42052	-0.378805	0.730394	0.40374	0.954292	0.680199	1.21571	0.155947	-0.209942	-0.929758	0.799149	2.51356	1.72755	2.07581	0.863852	1.02861	1.08499	0.737196	0.226048	-0.376999	NaN	-0.515875	2.31698	1.33088	1.99366	1.84638	0.0107651	-0.157831	1.42012	1.50877	1.96829	-1.16192
BRD4	Bromodomain-containing protein 4		2	5.8	19.526	166870000	-2.84406	-1.77027	NaN	NaN	-1.84594	-2.92243	NaN	NaN	NaN	-1.8289	1.56704	NaN	NaN	-1.25035	NaN	-2.5896	-1.66596	-2.031	-2.76177	-0.500738	NaN	-2.1439	1.11842	-1.63961	-1.37121	-0.0267429	-2.52616	NaN	-1.92636	NaN	NaN	NaN	NaN	-2.33052	-1.33418	NaN	-1.27906	NaN	NaN	NaN	NaN	-2.21573	NaN
CUTA	Protein CutA		2	26.3	18.961	19578000	NaN	NaN	NaN	NaN	NaN	NaN	NaN	NaN	NaN	NaN	NaN	NaN	-1.12582	0.198812	-0.656429	NaN	NaN	NaN	NaN	NaN	NaN	NaN	NaN	NaN	NaN	NaN	NaN	NaN	NaN	NaN	NaN	NaN	NaN	0.582193	NaN	NaN	NaN	NaN	NaN	NaN	NaN	NaN	NaN
NOL3	Nucleolar protein 3	+	20	91.4	323.31	165000000000	NaN	NaN	NaN	NaN	NaN	-4.61943	-4.49809	NaN	NaN	NaN	NaN	NaN	NaN	NaN	NaN	NaN	NaN	NaN	NaN	NaN	NaN	NaN	NaN	NaN	NaN	-4.96979	-2.73605	NaN	NaN	-4.88418	NaN	NaN	NaN	NaN	NaN	NaN	NaN	NaN	NaN	14.6483	9.84011	9.01779	NaN
WDR1	WD repeat-containing protein 1		6	15.8	60.865	428560000	-0.928417	-0.236874	0.073431	0.902586	1.09576	1.19959	-0.567614	-0.0948238	1.08344	NaN	NaN	NaN	NaN	NaN	NaN	NaN	NaN	-1.94175	-0.38623	-0.492083	-0.238306	-0.336021	-0.235121	-0.759602	NaN	-0.856579	1.40078	0.501053	-0.648872	0.00838661	NaN	-0.318323	0.0205402	-0.981728	-0.895376	NaN	NaN	NaN	NaN	NaN	NaN	NaN	-0.171131
CPNE3	Copine-3		2	5.2	17.549	127510000	-1.78731	NaN	NaN	-0.958397	-0.435562	-1.18268	NaN	NaN	-0.704178	-2.14124	-2.0244	-2.36371	NaN	NaN	NaN	NaN	NaN	NaN	-1.31565	NaN	-1.4009	-2.12688	-2.74155	-1.83053	NaN	-3.09609	-1.77184	-1.86263	-1.72521	-0.294149	NaN	NaN	NaN	NaN	-1.70946	NaN	NaN	NaN	NaN	NaN	NaN	NaN	-1.42955
GGCT	Gamma-glutamylcyclotransferase		2	15.7	10.629	39795000	NaN	NaN	NaN	NaN	-2.26842	-1.33707	NaN	-2.33249	NaN	NaN	NaN	NaN	NaN	NaN	NaN	NaN	-2.86301	NaN	NaN	NaN	NaN	NaN	-2.94848	NaN	NaN	NaN	-1.19821	NaN	NaN	-2.03469	NaN	NaN	-1.91569	NaN	NaN	NaN	NaN	NaN	NaN	NaN	NaN	NaN	-2.00227
MPDU1	Mannose-P-dolichol utilization defect 1 protein		1	19.2	6.4464	79524000	NaN	-3.43212	-2.69374	-1.42002	-1.15383	-1.05917	-2.23981	-2.22515	-1.95508	NaN	-3.37499	NaN	NaN	NaN	NaN	NaN	NaN	NaN	-1.77735	-2.76579	-1.65034	-2.58019	-2.07053	NaN	NaN	-1.05091	-1.8896	-3.29486	-2.59258	-2.33757	NaN	NaN	-2.14442	-3.64214	NaN	NaN	NaN	NaN	NaN	NaN	NaN	NaN	NaN
H2AFY	Core histone macro-H2A.1;Histone H2A;Histone H2A		6	33.3	103.1	837400000	-0.736439	2.16878	1.28236	1.77592	0.685192	1.15686	-0.798576	0.378439	1.34939	-0.0735741	2.14477	0.80179	NaN	-0.326674	-2.31651	NaN	0.211847	-0.343445	1.15021	1.32637	1.60357	0.320253	0.799583	1.35539	-2.7366	0.13636	-0.64175	0.595142	0.880011	0.898682	NaN	NaN	-1.38971	0.134804	-0.00917816	NaN	NaN	-0.242847	-0.0770683	0.10704	-1.08501	NaN	-0.628111
PRPF40A	Pre-mRNA-processing factor 40 homolog A		5	5.4	32.666	1036900000	0.865044	0.967682	1.21172	1.1511	-0.392769	-0.0363083	1.55254	1.21312	-0.303495	1.34972	1.86437	1.09227	1.07877	0.777536	0.70484	1.3505	0.896002	1.14598	1.5141	1.24731	1.96355	1.48873	2.3111	1.76318	1.74524	0.828854	-0.338032	0.695917	0.337727	0.428879	1.86604	1.56695	0.683115	0.95014	0.911453	1.4458	2.54787	1.68562	1.81553	0.428488	0.730072	2.27636	0.395275
PMPCB	Mitochondrial-processing peptidase subunit beta		3	9.4	23.458	82725000	-1.66966	-1.67617	-1.66457	-1.58512	-0.760933	-0.967175	NaN	-1.42977	-1.71246	NaN	NaN	NaN	NaN	NaN	NaN	NaN	NaN	NaN	NaN	NaN	NaN	NaN	NaN	NaN	NaN	NaN	-2.04018	-1.53978	NaN	NaN	NaN	-1.49345	0.302647	NaN	NaN	NaN	NaN	NaN	NaN	NaN	NaN	NaN	-1.57401
PSIP1	PC4 and SFRS1-interacting protein		4	14	24.546	193680000	NaN	-0.891659	-1.23647	NaN	-0.751331	-1.2075	NaN	NaN	-2.05641	-1.04173	0.954632	-0.210611	NaN	-1.43768	-1.61167	-1.68979	-1.37209	-0.281389	-1.77121	-2.77708	NaN	-1.78956	-0.600588	0.178341	NaN	-1.69928	-0.736067	-1.74094	-0.148474	-2.37831	NaN	NaN	NaN	-0.443726	-0.885742	-1.97973	-1.63191	-1.08812	-1.57083	-0.732481	-1.0254	-1.79095	NaN
SRSF10	Serine/arginine-rich splicing factor 10		5	46.1	83.355	4895600000	3.51696	3.74188	4.13084	2.68222	2.79066	2.80233	3.11723	2.04949	0.969624	3.78083	4.70411	4.17102	2.24369	2.95086	1.86925	4.49697	3.72232	3.68635	3.43504	3.38445	3.9704	3.09118	3.72592	4.57411	4.0883	2.08324	2.74548	3.35065	3.28994	2.97492	3.38224	2.21617	2.3016	3.7657	3.59359	4.0689	3.6597	3.5313	3.16623	3.71712	3.52321	3.75234	2.44394
CSDE1	Cold shock domain-containing protein E1		3	5.2	16.319	44264000	NaN	NaN	-2.31771	NaN	-2.4256	-2.41388	NaN	-2.70581	-2.45935	NaN	NaN	NaN	NaN	NaN	NaN	NaN	NaN	NaN	-2.26896	NaN	NaN	NaN	NaN	NaN	NaN	NaN	-2.2509	NaN	-2.92499	NaN	NaN	NaN	-2.45061	NaN	NaN	NaN	NaN	NaN	NaN	NaN	NaN	NaN	NaN
SNRNP200	U5 small nuclear ribonucleoprotein 200 kDa helicase		7	3.8	43.174	5636500000	1.16273	3.17676	4.13645	4.51921	3.76877	3.76729	3.43622	4.06927	4.38733	1.05112	NaN	NaN	2.7984	3.93082	3.17988	2.5772	0.0824509	NaN	5.24762	4.37991	4.53779	NaN	NaN	3.03193	NaN	2.86606	2.72215	3.73522	3.48645	2.85811	4.77155	4.43551	4.51932	NaN	NaN	NaN	4.54513	5.53631	3.67001	NaN	NaN	NaN	3.25706
RP2	Protein XRP2	+	22	45.4	260.84	15509000000	NaN	NaN	NaN	NaN	NaN	NaN	NaN	NaN	-10.543	NaN	NaN	NaN	NaN	NaN	NaN	NaN	NaN	-9.15304	-9.92625	NaN	-10.4213	NaN	NaN	NaN	NaN	NaN	NaN	NaN	NaN	NaN	NaN	NaN	NaN	NaN	NaN	NaN	NaN	NaN	NaN	NaN	NaN	NaN	-8.29402
EIF3G	Eukaryotic translation initiation factor 3 subunit G;Eukaryotic translation initiation factor 3 subunit G;Eukaryotic translation initiation factor 3 subunit G		2	18.5	44.828	244290000	NaN	NaN	-1.18665	-0.036602	-0.0705128	0.473856	-0.473824	-0.864927	-0.61194	NaN	-1.10499	-1.77189	NaN	NaN	NaN	-1.94453	NaN	NaN	-0.12612	-1.07107	-1.97256	-1.34488	-1.98931	NaN	-1.25188	NaN	-0.222538	0.0402718	-0.955236	-0.733086	NaN	NaN	-0.672878	NaN	-1.23645	-1.41682	NaN	NaN	NaN	NaN	-1.93909	NaN	-0.130205
ARL6IP5	PRA1 family protein 3		1	10.1	7.4776	8795000	NaN	NaN	NaN	-2.69913	-3.23067	NaN	NaN	NaN	NaN	NaN	NaN	NaN	NaN	NaN	NaN	NaN	NaN	NaN	NaN	NaN	NaN	NaN	-3.30155	NaN	NaN	NaN	NaN	NaN	NaN	NaN	NaN	NaN	NaN	NaN	NaN	NaN	NaN	NaN	NaN	NaN	NaN	NaN	NaN
FLOT1	Flotillin-1		4	13.7	23.237	81901000	NaN	NaN	-1.94046	NaN	-1.2503	-2.09306	-2.42593	-2.42351	-2.55246	NaN	NaN	NaN	NaN	NaN	NaN	NaN	NaN	NaN	-2.15264	-2.73788	-2.70572	NaN	NaN	NaN	NaN	-2.0282	-1.98302	-2.23017	-2.25004	-2.10917	NaN	NaN	-1.76554	NaN	NaN	NaN	NaN	NaN	NaN	NaN	NaN	NaN	-2.48871
ATP5L	ATP synthase subunit g, mitochondrial		2	26.3	12.035	30744000	-2.10628	NaN	-3.27607	-1.20858	-2.62558	-2.03005	NaN	NaN	-2.52672	NaN	NaN	NaN	NaN	NaN	NaN	NaN	NaN	NaN	-1.93548	NaN	-3.04285	-2.25941	-3.16307	NaN	NaN	NaN	NaN	-2.70712	NaN	NaN	NaN	NaN	-2.03819	NaN	NaN	NaN	NaN	NaN	NaN	NaN	NaN	NaN	-2.35975
RSL1D1	Ribosomal L1 domain-containing protein 1		6	16.3	52.431	366310000	-0.141701	-0.736504	NaN	-0.549292	0.0607872	1.02011	NaN	0.189886	1.09304	NaN	0.801514	NaN	NaN	1.27686	NaN	NaN	NaN	NaN	-1.29918	0.123444	-0.337364	NaN	1.12757	NaN	0.310875	1.53534	0.798058	NaN	0.00482368	NaN	NaN	0.544073	NaN	NaN	NaN	NaN	0.0571404	NaN	NaN	NaN	NaN	NaN	NaN
CLPX	ATP-dependent Clp protease ATP-binding subunit clpX-like, mitochondrial		1	2.1	16.565	2315200000	2.09244	2.74495	2.18626	1.91751	1.14832	1.22602	2.31718	1.81107	0.859243	3.08324	2.6945	3.05388	1.54151	2.3484	1.6056	3.42829	2.88951	2.58433	1.71638	2.5183	2.00422	2.62966	2.28522	2.68911	3.27691	2.4222	2.60013	2.27992	1.95905	2.29586	3.31128	2.77357	1.53799	2.64541	2.97982	2.67664	3.47879	2.35113	2.1413	2.63723	3.36948	3.26233	1.85275
SLI			1	0.9	9.4453	95317000	NaN	-3.0056	NaN	-3.64427	-4.26473	NaN	-0.595526	-2.45414	-4.33632	-2.05473	-3.02346	-3.63182	NaN	NaN	NaN	-4.14625	NaN	NaN	-3.03755	-3.65578	-5.56638	-2.45001	-2.58779	-2.50007	-2.36049	-2.77946	NaN	-3.41475	-4.09784	NaN	-2.42006	-1.82431	-3.74811	-2.54866	-0.66638	1.23667	-0.146364	-2.46364	-2.81325	NaN	-0.14887	0.140942	-2.96894
ENDOD1	Endonuclease domain-containing 1 protein		3	8	31.528	29051000	NaN	NaN	NaN	NaN	NaN	NaN	NaN	NaN	NaN	NaN	NaN	NaN	NaN	2.14785	-1.59112	NaN	NaN	NaN	NaN	NaN	NaN	NaN	NaN	NaN	NaN	NaN	NaN	NaN	NaN	NaN	NaN	NaN	NaN	NaN	NaN	NaN	NaN	NaN	NaN	NaN	NaN	NaN	-2.48572
LUC7L3	Luc7-like protein 3		12	28.9	208.64	3597800000	2.01505	3.24135	3.40405	2.43984	2.44609	2.69199	2.91373	0.12495	1.84879	4.17923	3.53858	4.20193	1.739	1.37473	1.21804	4.61387	3.51497	3.62875	2.83309	1.43943	2.84117	3.51054	3.31512	4.54575	3.885	1.88576	2.1256	3.14315	3.0772	2.79306	3.59706	2.06468	2.22279	3.78625	3.66644	3.27616	3.73525	2.3815	2.47736	3.45815	3.70712	3.09782	1.94326
PGM3	Phosphoacetylglucosamine mutase		3	6.5	20.576	89246000	-1.1383	NaN	NaN	-1.69386	-1.18229	-1.44263	-1.68257	-1.97982	-1.61596	NaN	NaN	NaN	NaN	NaN	NaN	NaN	NaN	NaN	-1.30785	NaN	NaN	NaN	-3.49966	NaN	NaN	NaN	NaN	-1.65027	-2.55455	-1.46043	NaN	NaN	-0.646002	-2.45449	NaN	NaN	NaN	NaN	NaN	NaN	NaN	NaN	-0.323082
AHSA1	Activator of 90 kDa heat shock protein ATPase homolog 1		6	22.8	52.729	153710000	NaN	-2.86838	-2.49159	-0.6264	2.17031	-0.761593	-2.88947	-2.0287	-2.99937	NaN	NaN	NaN	NaN	NaN	NaN	-2.62232	NaN	NaN	-3.4027	NaN	NaN	NaN	NaN	NaN	NaN	NaN	NaN	-1.74377	-2.86996	NaN	NaN	NaN	-2.69968	NaN	NaN	NaN	-3.12913	-3.35182	NaN	NaN	NaN	NaN	-1.73037
PSMG1	Proteasome assembly chaperone 1		1	15.9	6.4211	30103000	NaN	NaN	-3.3657	-1.09194	-2.90874	NaN	NaN	-2.64341	-2.90091	NaN	NaN	NaN	NaN	NaN	NaN	NaN	NaN	NaN	-2.45308	-4.22952	-3.68766	NaN	NaN	NaN	NaN	-4.12491	-3.18121	NaN	-3.70076	-3.4971	NaN	NaN	-3.84719	NaN	NaN	NaN	NaN	NaN	NaN	NaN	NaN	NaN	-2.9716
SGPL1	Sphingosine-1-phosphate lyase 1		1	11.1	6.7763	24484000	NaN	-2.42257	-2.13494	-2.59449	-3.72021	-2.6699	NaN	-2.07028	-2.36615	NaN	NaN	NaN	NaN	NaN	NaN	NaN	NaN	NaN	NaN	NaN	-2.3404	NaN	NaN	NaN	NaN	NaN	-2.46641	NaN	NaN	NaN	-2.33359	NaN	NaN	NaN	NaN	NaN	NaN	NaN	NaN	NaN	NaN	NaN	NaN
ACSL3	Long-chain-fatty-acid--CoA ligase 3		2	5.8	11.491	29077000	NaN	NaN	NaN	-2.22235	-2.67247	NaN	NaN	NaN	-1.73339	NaN	NaN	NaN	NaN	NaN	NaN	NaN	NaN	NaN	NaN	NaN	-2.65152	NaN	NaN	NaN	NaN	NaN	NaN	NaN	NaN	NaN	NaN	NaN	NaN	NaN	NaN	NaN	NaN	NaN	NaN	NaN	NaN	NaN	NaN
AIFM1	Apoptosis-inducing factor 1, mitochondrial		9	20.2	89.108	739770000	0.288666	-0.105959	-0.174974	0.111629	2.33414	1.79283	1.1511	1.59259	2.46563	NaN	-1.49339	NaN	NaN	-1.79541	NaN	NaN	NaN	NaN	-0.0326843	-1.0384	-0.393539	-1.73111	-1.16652	NaN	NaN	0.0643082	0.999611	0.29661	0.851301	0.324938	-2.41138	-1.02422	1.79631	-1.71033	-1.47793	-2.3206	-1.70778	-1.26821	NaN	NaN	NaN	NaN	1.8757
BPNT1	3'(2'),5'-bisphosphate nucleotidase 1		1	8.5	6.391	18258000	NaN	NaN	NaN	-3.17072	-2.61213	-2.30348	NaN	-2.13242	-2.55144	NaN	NaN	NaN	NaN	NaN	NaN	NaN	NaN	NaN	NaN	NaN	NaN	NaN	NaN	NaN	NaN	NaN	NaN	NaN	NaN	NaN	NaN	NaN	NaN	NaN	NaN	NaN	NaN	NaN	NaN	NaN	NaN	NaN	-1.52669
CLPTM1	Cleft lip and palate transmembrane protein 1		1	5.8	6.5004	17639000	NaN	NaN	-3.82557	-3.0412	-3.20534	NaN	NaN	-4.06952	-4.28447	NaN	NaN	NaN	NaN	NaN	NaN	NaN	NaN	NaN	-2.09794	NaN	-4.10269	NaN	NaN	NaN	NaN	NaN	NaN	NaN	NaN	NaN	NaN	NaN	NaN	NaN	NaN	NaN	NaN	NaN	NaN	NaN	NaN	NaN	NaN
TOMM40	Mitochondrial import receptor subunit TOM40 homolog		7	35.7	197.13	538680000	-1.92122	-1.18819	-0.726664	1.25007	3.21488	1.31653	NaN	-1.22328	-1.4738	NaN	-0.515198	NaN	NaN	NaN	NaN	NaN	NaN	NaN	-1.86108	-2.07569	-1.57862	NaN	NaN	NaN	NaN	-1.13474	NaN	-1.4056	-0.508953	-0.582436	NaN	-1.73533	-0.372536	NaN	-1.62017	NaN	-2.51532	-2.41847	NaN	NaN	NaN	NaN	-0.546684
LDHA	L-lactate dehydrogenase A chain		17	66	309.31	7247000000	3.51709	2.56772	3.00886	4.63122	4.40868	4.42027	4.15656	4.34386	5.05264	2.11959	0.907263	1.90025	-0.172258	-1.75966	-0.126514	0.64543	0.479944	0.0215816	4.22747	3.12388	3.35015	2.95334	2.518	1.32357	2.73872	3.47818	4.58078	4.6009	4.32188	4.8273	-0.622236	0.777166	3.37587	2.26591	2.35868	1.44459	1.76558	1.3632	-1.0126	1.7655	-0.119251	0.316896	5.68953
GLUD1	Glutamate dehydrogenase 1, mitochondrial		9	24	116.77	847330000	0.668829	0.743942	1.5008	1.04797	2.62916	2.26918	0.262287	1.23405	1.66448	NaN	NaN	NaN	NaN	NaN	NaN	-0.59185	NaN	NaN	0.191402	0.159016	0.799276	NaN	-0.593212	-0.721661	NaN	-0.159828	0.220806	0.583845	0.24477	0.883595	NaN	0.0419006	1.24288	-0.822746	-0.883345	NaN	NaN	NaN	NaN	NaN	NaN	NaN	0.725206
CYB5R3	NADH-cytochrome b5 reductase 3;NADH-cytochrome b5 reductase 3 membrane-bound form;NADH-cytochrome b5 reductase 3 soluble form;NADH-cytochrome b5 reductase	+	5	21.6	64.873	663760000	-0.485256	0.426884	0.161489	1.36054	2.16343	1.82632	-0.440283	0.210262	0.512516	-1.43848	-1.24301	-2.35223	NaN	-0.82523	NaN	-1.80588	NaN	NaN	0.195406	0.310863	0.0408878	-1.13729	-1.75955	-1.61707	-1.66531	-0.918808	0.221609	0.864756	0.604025	0.454897	NaN	-0.95108	1.14388	-1.0727	-1.33119	NaN	NaN	-0.976179	NaN	NaN	NaN	NaN	0.874193
MT-CO2	Cytochrome c oxidase subunit 2		2	7.5	16.981	317260000	-1.03265	-0.799618	0.532297	1.72285	0.500734	0.521345	-0.608017	0.884445	-0.122761	-2.1633	-2.20097	-1.75568	-2.56354	-0.328127	-2.14693	-1.43467	NaN	NaN	0.347227	-0.918325	0.776442	-1.20249	-1.70237	-2.14801	-1.37415	-1.01856	-1.12625	0.213326	-0.785246	-0.85346	NaN	NaN	-0.489975	-2.52078	-1.65305	-2.50539	NaN	NaN	NaN	NaN	-2.38427	NaN	NaN
SOD1	Superoxide dismutase [Cu-Zn];Superoxide dismutase [Cu-Zn];Superoxide dismutase [Cu-Zn];Superoxide dismutase [Cu-Zn];Superoxide dismutase [Cu-Zn]		4	54.8	82.964	608960000	0.360743	NaN	-2.32958	-0.593119	-0.539145	-0.470783	0.434393	1.01449	0.606434	-0.255861	-0.286964	0.306379	1.46008	2.56077	0.0241241	0.449385	-0.316172	-0.539404	0.456991	-0.501226	-1.04468	0.571449	0.0105324	0.227589	0.682858	-0.143055	1.14295	-0.924795	0.261856	0.724234	0.268173	0.189342	0.64459	2.97816	1.8423	1.19025	-0.154169	0.844219	-0.28702	0.332216	0.293568	1.40606	1.1578
PNP	Purine nucleoside phosphorylase		4	18.3	44.042	276300000	-0.688448	NaN	-0.516188	0.618277	-0.671246	-0.376572	-0.634949	-0.493893	0.689255	NaN	NaN	NaN	NaN	NaN	NaN	NaN	NaN	NaN	-0.827631	NaN	-1.06748	NaN	NaN	NaN	NaN	NaN	0.0329132	0.062952	-0.786823	0.275841	NaN	NaN	NaN	NaN	NaN	NaN	NaN	NaN	NaN	NaN	NaN	NaN	0.222649
HPRT1	Hypoxanthine-guanine phosphoribosyltransferase		2	11.9	11.528	23949000	NaN	NaN	NaN	NaN	NaN	NaN	NaN	-2.44847	-2.12857	NaN	NaN	NaN	NaN	NaN	NaN	NaN	NaN	NaN	NaN	NaN	NaN	NaN	NaN	NaN	NaN	NaN	NaN	NaN	NaN	NaN	NaN	NaN	NaN	NaN	NaN	NaN	NaN	NaN	NaN	NaN	NaN	NaN	0.551678
GOT2	Aspartate aminotransferase, mitochondrial;Aspartate aminotransferase		3	9.3	28.352	63784000	-2.61885	-2.51561	-1.95658	-1.54192	-2.2778	-1.78402	-2.44851	-2.08091	-2.17321	NaN	NaN	NaN	NaN	NaN	NaN	NaN	NaN	NaN	-2.29717	NaN	NaN	NaN	NaN	NaN	NaN	NaN	-1.5787	-2.12866	NaN	NaN	NaN	NaN	-2.30201	-2.39044	NaN	NaN	-1.75249	NaN	NaN	NaN	NaN	NaN	-2.32601
ABL1	Tyrosine-protein kinase ABL1;Non-specific protein-tyrosine kinase	+	30	31.3	323.31	18166000000	11.3988	7.01332	8.85744	-3.59781	-6.97856	-3.8648	-3.19393	-4.11962	-8.46785	NaN	NaN	-5.3044	-7.81798	NaN	NaN	NaN	NaN	NaN	-3.78148	NaN	NaN	-4.08681	-4.95358	-4.682	-4.54666	-4.34802	-3.40814	-3.89668	-4.53552	-3.73173	NaN	-4.56009	NaN	-4.31981	NaN	NaN	NaN	NaN	NaN	-5.26163	NaN	-4.69091	-3.57355
PGK1	Phosphoglycerate kinase 1		14	49.9	155.73	1587900000	1.42109	0.422739	1.30911	2.49923	2.73961	2.56327	1.78951	2.25646	2.59923	1.06065	-0.0919533	-0.939024	-2.06966	-0.579182	-0.171736	-1.47679	0.0383148	-1.54697	1.92008	0.647678	1.29596	0.832346	-0.45311	-0.280365	1.21462	1.56385	0.53779	2.34769	1.6361	1.86296	NaN	NaN	1.08812	-0.246799	1.04783	-0.537605	1.54753	0.831161	NaN	-0.363615	0.257114	-0.862329	4.04872
ALDO			18	58.8	294.11	5721600000	3.57338	2.28151	3.05194	3.91119	4.11452	4.51696	3.57799	3.67434	4.37198	2.50108	0.870436	1.3178	0.25943	0.0575867	-0.619118	1.60624	1.21509	0.420332	2.68954	2.03348	2.12182	2.3224	2.3961	1.68325	3.39021	3.18683	4.12634	4.19934	3.2814	4.23472	0.969622	0.554859	4.00483	3.45347	3.51137	3.12065	2.98986	2.04094	-0.470423	2.67591	1.98953	1.64535	5.87229
GAPDH	Glyceraldehyde-3-phosphate dehydrogenase;Glyceraldehyde-3-phosphate dehydrogenase;Glyceraldehyde-3-phosphate dehydrogenase		22	71.6	323.31	33861000000	5.78718	6.46575	7.11279	6.57919	6.98191	7.19266	6.07717	6.48472	6.91063	4.86345	4.40104	4.76464	2.78643	3.88554	3.16526	4.36588	3.77708	3.616	5.8482	5.20668	5.69314	5.04652	4.64639	5.10628	4.93826	5.63417	6.49811	6.25102	5.94144	6.06093	4.53976	5.40688	6.91688	4.73523	4.63184	3.87507	4.95918	4.68441	3.50969	4.4395	4.09866	3.89355	6.52789
HLA-A	HLA class I histocompatibility antigen, A-32 alpha chain;HLA class I histocompatibility antigen, A-43 alpha chain;HLA class I histocompatibility antigen, A-74 alpha chain;HLA class I histocompatibility antigen, A-31 alpha chain;HLA class I histocompatibility antigen, A-29 alpha chain;HLA class I histocompatibility antigen, A-25 alpha chain;HLA class I histocompatibility antigen, A-2 alpha chain;H…		4	21.7	80.946	320020000	-0.603077	0.213785	-0.836451	0.0497627	0.836063	0.819874	-0.998907	-0.113899	0.542809	-0.287432	NaN	NaN	NaN	NaN	NaN	NaN	NaN	NaN	-0.990875	-1.88596	-1.58808	NaN	NaN	NaN	NaN	-1.29922	-0.831135	-0.969622	0.140947	-0.806557	NaN	NaN	-0.548759	-0.324955	NaN	-0.984034	-0.455988	NaN	NaN	-0.965034	NaN	NaN	1.4822
TP53	Cellular tumor antigen p53;Cellular tumor antigen p53;Cellular tumor antigen p53;Cellular tumor antigen p53;Cellular tumor antigen p53;Cellular tumor antigen p53;Cellular tumor antigen p53;Cellular tumor antigen p53;Cellular tumor antigen p53;Cellular tumor antigen p53;Cellular tumor antigen p53;Cellular tumor antigen p53;Cellular tumor antigen p53;Cellular tumor antigen p53;Cellular tumor antige…		3	20.9	36.192	188170000	-1.03295	NaN	-2.08893	-1.67406	-0.204247	-0.652086	NaN	NaN	0.430552	NaN	NaN	NaN	NaN	NaN	NaN	NaN	NaN	NaN	-1.16571	NaN	-0.928864	-1.47615	-1.50607	-1.72466	NaN	NaN	-0.776432	-0.911346	-0.185711	-0.426331	NaN	NaN	-0.876141	NaN	NaN	NaN	NaN	NaN	NaN	NaN	NaN	NaN	-0.380867
RPN1	Dolichyl-diphosphooligosaccharide--protein glycosyltransferase subunit 1;Dolichyl-diphosphooligosaccharide--protein glycosyltransferase subunit 1;Dolichyl-diphosphooligosaccharide--protein glycosyltransferase subunit 1;Dolichyl-diphosphooligosaccharide--protein glycosyltransferase subunit 1		12	22.7	102.45	1072300000	-0.241934	0.488346	1.68603	2.19991	2.95903	2.78803	0.146517	1.25598	1.61556	-0.168756	-0.168467	-0.351753	NaN	-2.37709	NaN	-2.11454	NaN	NaN	2.00374	0.527443	1.21338	0.0372543	-0.414381	-0.106184	NaN	-0.546734	1.00192	0.938566	0.825884	1.23483	NaN	-0.904722	0.932802	-0.421688	-0.705084	NaN	-2.39986	-1.82064	-2.24296	NaN	-2.45633	NaN	0.323168
RPN2	Dolichyl-diphosphooligosaccharide--protein glycosyltransferase subunit 2		4	12.5	61.077	67570000	NaN	NaN	NaN	0.71002	-0.79315	-1.0126	NaN	NaN	NaN	-1.77353	NaN	NaN	NaN	NaN	NaN	NaN	NaN	NaN	NaN	NaN	NaN	NaN	-1.86918	NaN	NaN	NaN	-0.608147	NaN	-1.62482	-1.4076	NaN	NaN	NaN	NaN	NaN	NaN	NaN	NaN	NaN	NaN	NaN	NaN	NaN
GNAI2	Guanine nucleotide-binding protein G(i) subunit alpha-2	+	21	78.6	323.31	37197000000	NaN	NaN	NaN	-10.3113	-8.57573	-11.015	-10.6377	-10.072	-10.3708	NaN	NaN	NaN	NaN	-11.4756	NaN	NaN	NaN	-6.6151	NaN	NaN	NaN	NaN	-7.32683	NaN	8.78605	10.8442	12.9066	-10.6706	-11.3509	-10.7733	-9.69983	-9.93967	-9.9728	-8.38258	-7.17072	NaN	NaN	NaN	-10.529	NaN	NaN	NaN	-6.67244
HIST1H2AB	Histone H2A type 1-B/E;Histone H2A		1	57.7	7.3416	42821000	NaN	-2.15273	-2.42177	-2.5127	NaN	NaN	NaN	NaN	-3.21506	-1.25827	-2.2581	NaN	NaN	NaN	NaN	-3.42012	-2.39052	NaN	-0.82419	NaN	NaN	-2.36244	-2.36049	NaN	-2.08615	NaN	NaN	NaN	-2.50259	NaN	NaN	-2.91348	NaN	NaN	-1.64448	-2.53551	-1.66537	NaN	NaN	NaN	-1.94665	NaN	NaN
ATP1A1	Sodium/potassium-transporting ATPase subunit alpha-1		10	14.9	91.397	605360000	-0.177052	-1.08385	-0.183384	2.12479	1.31715	0.654203	0.40703	1.13952	1.15838	-0.518583	-0.504147	-0.525402	NaN	NaN	NaN	NaN	NaN	NaN	2.02571	0.46286	0.818083	-0.000951767	-0.0453854	-0.507296	NaN	-0.444176	0.769718	1.788	0.221958	0.353958	-1.10205	-0.890215	0.275948	NaN	-0.771704	NaN	-0.540024	-2.34689	NaN	NaN	NaN	NaN	0.576305
HMGN1	Non-histone chromosomal protein HMG-14		6	54	161.19	12771000000	5.60616	5.22657	3.66788	2.95434	3.46219	3.50517	5.83829	5.1231	4.72795	5.11689	5.72266	4.42002	4.31357	6.36737	4.86964	1.37156	2.79472	4.69581	4.60961	4.29818	4.47796	1.82793	4.80305	2.58396	4.78815	5.12801	5.36138	3.43848	4.74838	4.30857	5.44915	6.32569	5.5638	5.69433	5.41259	3.11738	5.64627	6.66094	6.48701	0.441576	2.35165	1.93525	4.19307
SLC25A5	ADP/ATP translocase 2;ADP/ATP translocase 2, N-terminally processed		4	34.2	25.109	1195500000	-0.0827694	1.47758	1.34565	2.58707	2.10447	2.05462	0.56793	1.89917	1.65784	0.863968	0.319281	-0.220362	NaN	-0.0559731	NaN	NaN	-0.82613	NaN	1.4357	1.41483	2.0889	0.436214	0.465742	0.275738	NaN	1.31666	2.05786	0.817942	1.65304	1.43637	NaN	NaN	0.432755	-0.658001	0.212931	NaN	NaN	NaN	NaN	NaN	-0.625326	NaN	-0.425898
PCCA	Propionyl-CoA carboxylase alpha chain, mitochondrial		32	57.1	323.31	15731000000	4.74532	4.78899	5.83773	4.23794	4.26071	4.72315	4.86096	4.64973	3.80083	5.73355	5.58293	6.39717	0.466391	3.97585	0.785172	6.04736	5.4308	5.59895	4.32193	5.15693	5.25976	5.10535	5.44333	5.76061	5.04374	5.0605	4.95212	4.94773	5.17559	5.49677	5.2657	4.92516	4.00779	5.45589	5.66589	4.74776	5.61931	5.64054	5.64669	4.12996	5.53685	5.66449	3.54304
EIF2S1	Eukaryotic translation initiation factor 2 subunit 1		6	29.5	40.509	391350000	-0.725147	NaN	0.0601768	-0.010973	-0.024847	0.184622	-0.383177	0.0528526	0.183697	NaN	NaN	NaN	-3.21733	NaN	NaN	NaN	NaN	NaN	0.168425	NaN	0.00723267	-1.00706	NaN	NaN	NaN	0.391531	-0.639923	-0.353378	0.407433	-0.275665	NaN	-1.32801	0.908808	-1.35843	NaN	NaN	NaN	NaN	-2.12148	NaN	NaN	NaN	-0.232401
HMGN2	Non-histone chromosomal protein HMG-17		7	53.3	323.31	107000000000	8.85848	7.97516	5.80722	7.33148	6.896	7.49402	8.02067	6.99454	7.79072	8.0664	9.10894	8.82731	7.45274	8.13638	6.8343	7.64447	8.12689	8.11805	6.90663	6.04942	7.37608	8.5726	8.44928	9.07928	7.91143	7.56569	8.52703	6.9842	7.75596	7.93806	8.14622	8.54082	8.07152	8.76641	8.46239	8.21145	9.35369	8.88443	8.82107	7.4743	8.13196	7.88145	6.37238
RPLP0	60S acidic ribosomal protein P0		4	33.1	26.064	233380000	-1.51646	-1.31769	-0.0326157	-0.413799	-0.948181	-0.959564	-2.22956	-0.902006	-0.592283	-1.1804	-2.01952	NaN	NaN	NaN	NaN	NaN	NaN	NaN	-0.989681	-1.6535	-0.628674	-1.69787	-1.2819	NaN	-1.00636	-1.21629	-0.531893	-0.236612	-1.07126	-0.603579	NaN	-2.97855	0.043396	-0.587271	-0.880741	-1.05043	-1.53474	NaN	NaN	-1.79016	-1.16836	NaN	-0.105665
KRT18	Keratin, type I cytoskeletal 18		14	44	315.35	1925700000	2.31258	2.90264	3.72273	2.82996	3.80518	3.49275	1.97459	2.17788	2.17598	-0.231426	-0.0617714	-0.339209	NaN	-1.36128	0.3365	-1.08055	-0.524103	NaN	1.32957	1.19867	1.72973	0.6119	0.799837	0.658566	-0.985981	1.37654	1.95572	2.37173	1.95487	2.20281	2.02335	-0.623899	2.31355	0.0232449	0.0828686	NaN	-0.054882	-0.603724	NaN	-0.769014	0.236715	-1.50439	1.8153
GLA	Alpha-galactosidase A		2	6.8	11.332	73087000	NaN	NaN	NaN	-1.39133	-1.39611	-1.07976	NaN	-1.37804	-1.71466	NaN	NaN	NaN	NaN	NaN	NaN	NaN	NaN	NaN	-1.6661	NaN	NaN	NaN	NaN	NaN	NaN	NaN	NaN	-1.84044	-2.03357	-1.55695	NaN	NaN	-1.05365	NaN	NaN	NaN	NaN	NaN	NaN	NaN	NaN	NaN	-0.529633
PTMA	Prothymosin alpha;Prothymosin alpha, N-terminally processed;Thymosin alpha-1		1	13.1	6.5963	28612000	NaN	-0.989046	NaN	NaN	NaN	NaN	NaN	-0.8561	NaN	NaN	NaN	NaN	-1.60344	-1.18667	NaN	NaN	NaN	NaN	NaN	NaN	NaN	NaN	NaN	NaN	NaN	NaN	NaN	NaN	NaN	NaN	NaN	NaN	NaN	NaN	-0.369501	NaN	NaN	-1.19743	NaN	NaN	-1.66816	NaN	NaN
ATP5B	ATP synthase subunit beta, mitochondrial;ATP synthase subunit beta;ATP synthase subunit beta		13	37.2	127.78	1982100000	1.09038	2.66732	2.3159	2.75794	2.69225	2.38257	1.93494	2.35831	2.48205	0.865271	0.665586	-0.0102787	-1.14199	0.0036068	NaN	0.677124	0.527151	NaN	1.71145	1.43022	1.21481	1.42034	1.81876	0.726852	1.2621	1.7798	2.38308	2.97254	2.28255	1.8927	0.855726	1.1944	3.54843	0.671915	1.94813	0.459114	1.57988	0.255878	NaN	-0.278139	1.19857	-0.212458	2.57991
ENO1	Alpha-enolase;Enolase;Enolase		32	75.1	323.31	26306000000	4.9243	5.07203	5.69946	6.39625	6.52624	6.80264	5.59344	5.80552	6.2333	4.73842	3.36227	4.12284	2.24074	3.01018	1.2083	3.80309	3.28413	2.66815	5.11008	4.58475	4.75915	4.68047	4.27918	3.80587	5.22804	5.27211	6.03312	6.72144	6.17334	6.30654	3.97567	4.29509	5.90689	4.46019	4.62806	3.91229	4.6737	3.69794	2.76545	4.60409	4.01459	3.55035	7.49689
GPI	Glucose-6-phosphate isomerase;Glucose-6-phosphate isomerase;Glucose-6-phosphate isomerase		15	43.9	206.67	1214500000	-0.159969	-0.760691	0.772282	2.40145	4.18935	3.12937	-1.35558	-1.59195	1.53277	0.128456	-1.66931	-2.24162	NaN	NaN	NaN	-1.3958	-2.84926	NaN	2.35058	-3.26401	1.22709	-0.293175	-1.69611	-1.41643	-2.46214	-1.82078	0.160557	1.80958	1.05328	0.44879	NaN	NaN	-0.529247	-1.69839	-0.154194	-1.41608	-1.92654	NaN	NaN	-0.450813	-1.54519	-0.5399	3.89341
NPM1	Nucleophosmin		10	46.4	183.31	2444300000	1.1029	1.2354	2.25956	2.094	2.79304	3.20574	2.33598	2.51682	2.65919	0.673578	1.75183	0.346241	-0.0355377	0.75334	-0.443743	-0.0892143	0.00297928	-0.494705	2.45874	2.7366	1.53521	0.966738	1.57305	0.802906	1.60605	1.6312	2.83144	2.01351	2.07461	2.41206	-0.313272	0.694618	1.85458	2.06421	2.13943	1.39057	0.858418	0.874887	0.104807	2.33094	1.00433	-0.0935802	2.78718
LDHB	L-lactate dehydrogenase B chain;L-lactate dehydrogenase;L-lactate dehydrogenase		15	55.7	189.29	8344900000	3.9449	2.85259	3.43303	4.27166	3.8529	4.18967	4.65458	4.52263	5.7831	2.88123	2.53066	2.32608	0.0870914	1.21688	-0.0312119	0.695572	0.996721	0.361809	4.34661	3.66316	3.17471	2.9928	1.28706	2.03369	3.1265	3.92371	4.9242	4.74566	3.92073	4.57791	0.411743	1.40739	3.35844	2.64098	2.37565	1.54401	2.76941	1.55826	0.744766	2.22379	1.81264	0.926813	6.85086
P4HB	Protein disulfide-isomerase;Protein disulfide-isomerase		4	12.7	21.892	58628000	NaN	NaN	NaN	-2.44823	NaN	-2.48135	NaN	-2.50741	-2.21243	NaN	NaN	NaN	NaN	NaN	NaN	NaN	NaN	NaN	-2.97347	NaN	NaN	-1.93734	NaN	NaN	NaN	NaN	-2.36215	-2.04047	-3.29804	NaN	NaN	NaN	NaN	-1.79289	NaN	NaN	NaN	NaN	NaN	NaN	NaN	NaN	1.60486
CTSD	Cathepsin D;Cathepsin D light chain;Cathepsin D heavy chain		4	13.6	33.313	376940000	-1.47456	-1.16935	-0.989155	0.249037	1.67969	0.912977	-0.518799	-0.969007	-0.0787716	-1.99346	-2.48088	NaN	NaN	NaN	NaN	-1.84841	-2.11097	NaN	-1.04499	-0.202864	-1.10572	-1.61761	-1.93637	NaN	-1.34725	-1.01986	0.497406	-0.0942402	0.286676	-1.40854	-1.0852	-1.79877	0.176971	-2.13454	-1.69063	-2.39894	-1.41935	NaN	NaN	-2.0816	-2.0206	-1.74285	-0.0464287
ANXA2	Annexin A2;Annexin;Annexin;Annexin;Annexin;Annexin;Annexin;Annexin;Annexin;Annexin;Annexin;Annexin;Annexin;Annexin;Annexin;Annexin;Annexin;Annexin;Annexin		7	57	46.513	141540000	NaN	-2.19941	-1.12602	-1.32746	-1.46796	-2.16684	-1.915	-1.86701	-1.18346	-2.40668	NaN	NaN	NaN	NaN	NaN	NaN	NaN	-2.37229	-0.911243	NaN	-2.09018	-2.08887	-1.29285	-2.77742	NaN	NaN	-2.44648	-1.01381	-1.36366	-1.35957	-2.94419	NaN	NaN	-1.43693	-1.23645	NaN	-1.40769	-1.95623	NaN	-0.779245	-1.80331	NaN	-0.500614
TUBB	Tubulin beta chain		6	67.4	197.95	9694900000	4.14135	3.80791	4.28816	4.77495	4.79507	5.18307	5.24799	5.06086	6.00148	2.43176	1.95248	2.21493	1.88493	2.28967	1.08591	1.69053	1.37908	0.764179	3.95839	3.50539	3.08095	2.73406	1.89705	2.43434	3.3514	3.26089	3.81925	5.0835	4.1578	4.13284	2.67329	0.927269	4.2724	3.07204	3.01057	2.67962	3.7517	2.87024	0.647816	2.5078	1.97003	1.97018	5.73991
PFN1	Profilin-1		14	90	323.31	6316800000	3.06577	2.9254	4.08274	4.8507	3.79379	4.10163	3.67879	3.79494	4.86128	3.32433	2.20268	2.76901	0.442413	2.49392	-0.747267	3.23645	2.30222	1.8678	4.18738	3.75303	3.93978	3.58702	2.73503	3.22314	2.60271	3.1325	3.73307	3.77093	3.7753	3.82905	1.64782	2.61161	3.70677	2.98222	3.22751	2.27352	2.6644	1.53353	0.993271	2.3931	2.93646	1.65148	3.97139
A			3	30.7	26.073	92753000	-2.24652	NaN	-1.977	-1.38982	-1.76311	-2.07685	NaN	-1.85584	-1.95215	NaN	NaN	NaN	NaN	NaN	NaN	NaN	NaN	NaN	-1.95937	NaN	-2.17577	-2.10922	-2.21708	-2.46018	-2.08562	-2.40786	-1.57121	-1.79268	-2.11714	NaN	NaN	NaN	-1.71791	NaN	-2.06854	NaN	-1.91912	NaN	NaN	NaN	NaN	NaN	-0.350737
EPRS	Bifunctional glutamate/proline--tRNA ligase;Glutamate--tRNA ligase;Proline--tRNA ligase		11	8.7	71.01	292310000	NaN	NaN	-1.02937	-0.86904	0.892115	-0.721983	-0.438305	-0.389353	0.257076	0.926146	-0.639866	-0.197538	NaN	NaN	NaN	NaN	0.00845909	NaN	-0.668671	NaN	-1.11919	-0.410412	-1.26575	NaN	NaN	-1.17272	-0.778942	-0.218386	-0.0262852	-0.961384	NaN	NaN	-1.14622	-0.84635	-0.375277	NaN	NaN	NaN	NaN	NaN	NaN	0.534765	-0.761791
HSP90AA1	Heat shock protein HSP 90-alpha		19	45.2	271.95	3051000000	2.92191	2.11918	2.33552	3.24032	4.02445	3.8796	3.35377	3.36085	3.68537	1.21292	-0.562895	0.399572	0.30522	-0.732452	-2.4887	-2.2383	NaN	NaN	3.57705	1.65957	1.98785	1.63487	1.44146	0.605333	2.23412	1.77071	1.92069	3.73465	2.76715	2.26714	0.555777	1.69712	4.15732	1.13475	1.49025	1.07859	2.34443	0.435593	-0.833517	-1.15411	-0.111837	-0.705706	3.89417
HNRNPC	Heterogeneous nuclear ribonucleoproteins C1/C2		6	30.7	63.027	1494100000	0.981642	0.722178	2.21502	1.81924	1.73196	2.14979	1.49812	1.33541	2.80644	-1.09685	0.280413	-0.888683	NaN	0	0.193205	-2.28647	-0.0625763	NaN	2.52249	2.29757	2.43312	0.381372	0.13036	0.680834	-0.373684	0.951366	2.39771	0.321411	0.867788	2.44645	-3.76229	0.886835	2.06107	1.95569	1.358	0.417456	-0.412134	0.782711	1.97179	1.35792	1.63839	-0.824608	1.2818
HSP90AB1	Heat shock protein HSP 90-beta		25	51.4	323.31	17914000000	5.00408	4.69885	5.01921	6.13256	5.92498	5.86041	5.62682	5.73274	6.04293	4.19055	3.40811	3.70914	3.05238	3.09522	2.5051	3.6265	2.83196	1.90619	5.48063	4.41081	4.96675	4.44257	3.97537	4.09485	4.73405	4.44271	5.24647	5.7679	5.02168	5.16582	4.22541	5.04363	6.41687	4.4607	4.26178	3.92234	4.59018	3.79949	2.40078	3.7283	3.79371	3.77725	6.00277
PDHA1	Pyruvate dehydrogenase E1 component subunit alpha, somatic form, mitochondrial;Pyruvate dehydrogenase E1 component subunit alpha		4	15.9	27.487	121730000	NaN	NaN	NaN	-1.25202	0.219669	-0.54421	NaN	NaN	NaN	NaN	NaN	NaN	NaN	NaN	NaN	NaN	NaN	NaN	NaN	NaN	NaN	NaN	-1.62092	NaN	NaN	NaN	-1.3093	-1.31682	-1.45358	NaN	NaN	NaN	NaN	NaN	NaN	NaN	NaN	NaN	NaN	NaN	NaN	NaN	-1.0903
SNRNP70	U1 small nuclear ribonucleoprotein 70 kDa		15	35.7	169.93	2649400000	1.59869	1.55478	1.35126	0.19203	2.0087	0.474012	0.352497	-0.0173969	2.0792	1.28096	3.54207	2.26471	NaN	2.94772	0.393574	0.923656	0.909657	1.33994	3.06762	4.50344	3.21538	0.668806	3.26573	1.32875	1.77367	3.40576	0.985598	0.842367	2.01403	1.60943	-1.12137	-0.781145	0.44035	2.08302	2.50974	2.19703	0.272858	1.37836	1.32355	0.587973	2.02266	1.37728	0.402897
VIM	Vimentin		39	74.7	323.31	34227000000	6.89826	6.41637	6.89842	6.4964	6.99542	6.72149	5.89279	6.25922	5.95774	4.8774	5.09021	5.02671	3.63891	5.01558	2.69432	4.73906	4.28728	3.73207	5.97018	5.59127	5.65215	5.43191	5.52693	4.89577	5.24107	5.67245	6.60469	6.68458	6.11291	6.37767	4.92712	5.33028	6.60443	5.28598	5.42092	4.59315	5.08193	4.48335	3.79998	4.97647	4.80803	4.27457	5.93373
GNAI3	Guanine nucleotide-binding protein G(k) subunit alpha	+	25	92.4	323.31	87725000000	NaN	NaN	NaN	-9.13534	-8.00714	NaN	NaN	NaN	-9.21316	NaN	-9.89745	NaN	NaN	-9.95242	NaN	NaN	NaN	NaN	-10.2292	-8.55084	-8.4636	NaN	-9.34994	NaN	6.43382	4.78122	9.74393	10.9134	11.5153	10.9336	NaN	NaN	-5.50306	NaN	NaN	NaN	-10.0622	NaN	NaN	-2.00538	-3.87541	-5.35952	-9.26858
RPSA	40S ribosomal protein SA;40S ribosomal protein SA;40S ribosomal protein SA;40S ribosomal protein SA		2	25.9	16.334	154740000	NaN	-1.01611	NaN	-0.678186	-1.35765	-1.26028	-1.15119	-0.0202904	-0.779491	-1.71263	NaN	NaN	NaN	-1.63535	NaN	NaN	NaN	NaN	0.196091	NaN	NaN	NaN	NaN	NaN	-1.3251	NaN	NaN	-1.25599	-2.13278	NaN	NaN	NaN	-0.953081	-2.32092	-1.42952	-2.42497	-0.796181	-0.775488	NaN	-1.60574	-2.15493	-3.02767	-0.0768776
GSTP1	Glutathione S-transferase P		3	22.4	23.167	159900000	NaN	NaN	NaN	-0.698244	-0.824863	-0.591944	NaN	-0.614792	0.631788	NaN	NaN	NaN	NaN	NaN	NaN	NaN	NaN	NaN	NaN	NaN	NaN	NaN	NaN	NaN	NaN	-0.879633	-1.42025	-0.570492	-1.38844	-0.243879	NaN	NaN	-0.683506	-0.758755	NaN	NaN	NaN	NaN	NaN	-0.489054	-1.03542	NaN	-0.719721
MMP10	Stromelysin-2		1	6.1	7.2366	1199500000	1.80643	2.14973	3.16905	1.92496	0.663631	1.25463	2.59624	1.51457	1.42669	2.90335	1.74214	2.65291	NaN	2.05692	NaN	2.95075	3.02756	2.37231	0.833225	1.55616	1.43136	2.46833	1.6367	3.04474	NaN	NaN	NaN	2.12946	NaN	NaN	NaN	NaN	2.02626	NaN	NaN	NaN	2.60315	NaN	NaN	NaN	2.07343	NaN	NaN
HMGB1	High mobility group protein B1		5	32.1	45.648	445220000	-2.757	2.03797	-1.77593	-3.93595	-0.573017	-1.39377	-2.33698	-2.49569	-0.0581055	-0.553059	2.58164	1.87383	-2.88049	1.73959	0.137064	-1.66394	-0.829222	0.356716	-2.03732	-2.00313	-1.70968	-1.69099	1.16483	2.26892	-2.99406	NaN	1.04939	NaN	0.29154	-2.8946	NaN	NaN	-2.04232	1.6884	-2.25666	-2.59009	-0.975563	NaN	-0.425856	0.672581	-1.72435	-3.21083	NaN
GNAO1	Guanine nucleotide-binding protein G(o) subunit alpha	+	10	94.1	323.31	200000000000	-7.31507	-8.38843	-7.24593	0.0967884	-1.64854	-1.95407	-4.51253	-3.99939	-2.07219	-2.38286	0.0672245	-2.06227	-8.0565	NaN	-8.95814	-2.95676	-2.28815	-9.2297	-7.49598	-7.99045	-8.44417	-1.5264	-0.351685	-8.27636	4.4162	0.717041	2.95397	2.938	6.00751	5.24396	NaN	-7.48052	-4.42024	3.2353	2.38379	0.832302	-7.34566	-6.67548	NaN	-2.45745	-3.18305	-3.81822	11.7647
CNP	2',3'-cyclic-nucleotide 3'-phosphodiesterase		3	14	32.511	91618000	NaN	NaN	NaN	NaN	NaN	NaN	-1.0631	NaN	1.30549	NaN	NaN	NaN	NaN	NaN	NaN	NaN	NaN	NaN	-1.55835	NaN	NaN	NaN	NaN	NaN	NaN	NaN	NaN	NaN	NaN	NaN	NaN	NaN	-1.31122	NaN	NaN	NaN	NaN	NaN	NaN	NaN	NaN	NaN	NaN
DLD	Dihydrolipoyl dehydrogenase, mitochondrial;Dihydrolipoyl dehydrogenase;Dihydrolipoyl dehydrogenase		10	23.2	85.581	777910000	-0.060257	-0.793123	1.04739	0.702166	1.80814	1.26709	0.526936	0.835457	1.32871	NaN	-0.851429	-1.99633	NaN	NaN	NaN	-1.73729	NaN	-2.36638	0.284611	0.260103	-0.304743	-1.0269	-1.70389	-2.15202	NaN	-2.25705	0.200865	1.22569	1.2437	0.771852	NaN	-0.444599	1.61013	-2.40341	-2.04122	NaN	-0.88904	-2.09426	-1.77815	NaN	NaN	NaN	2.45829
HNRNPA1	Heterogeneous nuclear ribonucleoprotein A1;Heterogeneous nuclear ribonucleoprotein A1, N-terminally processed		16	62.2	261.46	8336000000	4.28277	3.45537	4.20372	3.7322	4.44974	4.35706	4.15501	3.92087	5.07356	3.24617	2.80709	2.9585	2.32475	2.39748	0.44655	2.21634	2.33348	0.843817	3.82832	3.90096	3.18877	3.44807	3.57697	3.19448	3.4356	3.40022	4.84665	3.71302	3.69879	4.06802	2.44814	2.72215	3.8295	3.70838	3.20894	3.62658	3.3836	2.98005	2.51395	3.18213	3.4287	4.01489	5.13461
SNRPA1	U2 small nuclear ribonucleoprotein A'		1	12.4	6.4882	18414000	NaN	NaN	NaN	NaN	NaN	NaN	NaN	NaN	-1.5167	NaN	NaN	NaN	NaN	NaN	NaN	NaN	NaN	NaN	NaN	NaN	NaN	NaN	NaN	NaN	NaN	NaN	-3.15844	-2.6667	NaN	NaN	NaN	NaN	NaN	NaN	NaN	NaN	NaN	NaN	NaN	NaN	NaN	NaN	-1.00663
PARP1	Poly [ADP-ribose] polymerase 1		31	39.4	273.58	3674700000	3.83829	1.8141	1.52015	3.96704	4.87036	4.15941	2.88961	3.11013	3.32113	0.553051	0.982811	0.550648	NaN	-0.535749	NaN	0.115688	-0.278877	NaN	3.58339	1.90624	2.22901	0.838402	0.870378	0.00426674	1.60541	2.32682	2.56572	4.19923	3.29269	2.68284	-2.14484	-0.987474	1.57118	0.526155	1.16791	0.0968685	-2.6082	-0.936319	-1.44011	-3.57657	-0.125105	NaN	2.8553
UCHL1	Ubiquitin carboxyl-terminal hydrolase isozyme L1;Ubiquitin carboxyl-terminal hydrolase;Ubiquitin carboxyl-terminal hydrolase;Ubiquitin carboxyl-terminal hydrolase;Ubiquitin carboxyl-terminal hydrolase;Ubiquitin carboxyl-terminal hydrolase		4	34.8	87.098	433320000	NaN	-1.9791	-1.44201	-0.572748	0.604544	0.290304	0.482096	NaN	0.811892	-0.834324	-2.48635	-1.2125	-2.01196	NaN	NaN	-0.924541	NaN	NaN	0.364351	-2.43832	NaN	-1.12282	-2.75911	NaN	-1.05882	NaN	-0.42218	-1.04994	0.742884	-0.0171413	NaN	NaN	-1.51407	-0.927486	NaN	-0.629	-2.03159	NaN	NaN	NaN	-0.99828	-0.903463	2.7478
LTA4H	Leukotriene A-4 hydrolase		1	2.4	11.622	15999000	NaN	NaN	NaN	-2.9443	-1.83408	-2.64982	NaN	NaN	NaN	NaN	NaN	NaN	NaN	NaN	NaN	NaN	NaN	NaN	NaN	NaN	NaN	NaN	NaN	NaN	NaN	NaN	NaN	NaN	-3.47136	NaN	NaN	NaN	NaN	NaN	NaN	NaN	NaN	NaN	NaN	NaN	NaN	NaN	NaN
ALDOC	Fructose-bisphosphate aldolase C;Fructose-bisphosphate aldolase;Fructose-bisphosphate aldolase;Fructose-bisphosphate aldolase;Fructose-bisphosphate aldolase;Fructose-bisphosphate aldolase;Fructose-bisphosphate aldolase;Fructose-bisphosphate aldolase		2	16.8	34.659	85931000	NaN	NaN	NaN	-0.413313	-1.1916	-1.75801	-1.35705	-1.34558	-1.02666	NaN	NaN	NaN	NaN	NaN	NaN	NaN	NaN	NaN	NaN	NaN	NaN	NaN	NaN	NaN	NaN	-1.30182	-1.49449	-1.10715	NaN	-1.10097	NaN	NaN	-0.833271	NaN	NaN	NaN	NaN	NaN	NaN	NaN	NaN	NaN	0.66053
H2AFJ	Histone H2A.J;Histone H2A;Histone H2A		0	58.6	194.49	5101300000	1.41909	4.89768	4.28154	3.60321	2.29108	2.01896	3.74035	4.35784	2.51541	4.88581	3.86597	2.09067	1.86582	3.95633	1.16397	2.23775	3.89315	1.43506	4.53158	2.80638	2.6683	2.99977	3.61244	2.6307	3.2085	1.64628	1.00409	3.13903	3.20541	1.31461	2.41825	2.70099	1.88601	2.16296	4.74661	1.79395	5.6242	5.81472	1.41768	3.10215	3.77604	2.29387	2.74856
HSP			14	45.1	263.75	9450200000	3.95545	3.67345	4.41384	4.90036	4.54025	4.62402	4.23584	4.29243	4.40224	4.18381	3.46178	3.4226	2.39726	2.80512	NaN	4.06368	3.25138	2.30265	4.35468	3.55148	3.71963	3.75666	3.46868	3.21684	4.44861	3.97458	4.56201	4.75876	4.15296	4.1986	3.7547	3.45221	4.38583	3.88196	4.25815	3.82554	4.48154	3.65556	2.52454	3.3846	3.52243	3.74024	5.37713
U2AF1L5			5	25.8	49.885	875100000	0.158754	1.34242	0.934231	0.0369205	1.0234	0.550653	0.0289364	0.679237	0.812189	0.208082	1.85669	2.05597	-0.984426	-0.365002	-0.437393	0.254534	-0.122593	0.782312	0.800549	0.401512	0.573494	1.02468	1.80235	1.72914	0.391603	0.855074	2.37418	0.140585	1.1395	0.409517	0.327869	1.19301	1.26737	0.837118	1.19207	0.378681	1.21	0.759569	0.257217	1.21	1.37296	0.185713	0.231104
HIST1H1D	Histone H1.3		4	38.8	148.76	7875500000	3.20194	3.95879	5.39611	2.41053	3.14787	3.00559	3.54552	3.71536	3.57647	4.49819	5.30104	4.19673	2.53131	4.66396	2.23943	3.421	3.71675	4.30183	4.46832	4.39994	5.05166	4.09714	4.46756	3.47862	4.15343	3.51663	3.06656	3.159	3.24516	3.6448	2.26496	3.0749	2.9934	3.84921	4.43692	3.05989	4.25898	4.29582	4.99592	3.96457	3.95715	3.49207	2.03119
TXN	Thioredoxin;Thioredoxin		5	30.5	67.711	2476500000	2.96377	1.71835	2.11627	1.54476	1.87193	1.96722	2.79256	0.725563	0.41188	4.3809	3.738	3.05792	1.40202	1.4085	0.319046	3.53209	3.01435	3.00191	2.3211	1.64831	1.67118	3.49348	2.91364	2.89426	3.32167	1.48879	0.814138	2.4408	2.16979	1.44124	2.57842	2.41438	-0.947273	3.08046	3.14678	3.84497	3.49567	1.92491	1.14454	2.41288	3.06978	3.99255	1.65772
ESD	S-formylglutathione hydrolase		2	12.4	14.554	58202000	NaN	NaN	NaN	-1.50053	-1.06539	-1.15852	NaN	NaN	NaN	NaN	NaN	NaN	NaN	NaN	NaN	NaN	NaN	NaN	NaN	NaN	NaN	NaN	NaN	NaN	NaN	-2.4147	-2.69773	-1.91571	-1.85449	-1.7362	NaN	NaN	NaN	NaN	-2.44962	NaN	NaN	NaN	NaN	NaN	NaN	NaN	-1.36038
HSPD1	60 kDa heat shock protein, mitochondrial		8	22.2	87.821	890640000	1.07614	2.15552	2.4809	0.841608	0.376747	-0.378613	0.17037	1.64791	0.942091	0.544497	0.802998	NaN	NaN	0.34903	-0.874283	NaN	-0.0810757	NaN	1.02537	0.941019	0.347311	-0.258036	0.723747	-0.0310001	0.154345	0.790052	1.5958	0.898415	0.275768	0.716261	-0.533102	NaN	0.337671	1.51029	1.92288	0.35795	2.46585	1.91463	0.31983	0.363997	1.24269	-0.29113	1.26323
HSPA5	78 kDa glucose-regulated protein		2	5.2	16.699	180710000	-0.648418	-0.523933	-0.248289	-0.533989	-0.753515	-0.47492	NaN	NaN	NaN	-0.43259	-0.394304	-0.56175	NaN	NaN	NaN	-0.170101	-0.835098	-0.765396	NaN	NaN	NaN	-0.546827	-0.869684	-0.5261	0.15962	-0.539732	-0.174084	-0.449404	-0.587828	-0.691481	NaN	NaN	NaN	-0.792555	-0.330269	-0.440752	NaN	NaN	NaN	-0.797308	-0.477011	-0.553234	-0.655876
HSPA8	Heat shock cognate 71 kDa protein		13	36.3	218.36	9656700000	3.69297	4.00982	4.9968	4.78843	4.61446	4.69069	4.34836	4.30691	4.29695	4.56225	4.02169	4.19473	3.1131	3.48183	2.47458	4.70279	4.16259	3.86983	4.42328	4.25331	4.14533	4.24636	4.06293	4.27854	4.7646	4.03576	4.53465	4.88831	4.38657	4.41273	4.39225	4.1324	4.51126	4.55353	5.05734	4.17076	5.15041	4.10177	2.85161	4.06933	4.6751	4.21222	4.93173
PDHB	Pyruvate dehydrogenase E1 component subunit beta, mitochondrial		1	4.7	10.751	33995000	NaN	NaN	NaN	-1.69901	-2.07114	-1.855	NaN	NaN	NaN	NaN	NaN	NaN	NaN	NaN	NaN	NaN	NaN	NaN	NaN	NaN	NaN	NaN	NaN	NaN	NaN	NaN	-2.33388	NaN	-1.92108	NaN	NaN	NaN	NaN	NaN	NaN	NaN	NaN	NaN	NaN	NaN	NaN	NaN	NaN
RALB	Ras-related protein Ral-B		1	5.8	6.8094	19358000	NaN	NaN	NaN	NaN	-1.5763	-2.73088	NaN	NaN	NaN	NaN	NaN	NaN	NaN	NaN	NaN	NaN	NaN	NaN	NaN	NaN	NaN	NaN	NaN	NaN	NaN	NaN	-3.39286	-3.43876	-3.25862	NaN	NaN	NaN	NaN	NaN	NaN	NaN	NaN	NaN	NaN	NaN	NaN	NaN	-3.19563
LAMP1	Lysosome-associated membrane glycoprotein 1		1	3	7.0716	73994000	-1.37947	-1.94341	-3.32575	-0.689108	-1.9337	-1.67456	-0.919699	-2.06329	-0.968906	NaN	NaN	NaN	NaN	NaN	NaN	NaN	NaN	NaN	-1.74747	NaN	NaN	NaN	NaN	NaN	NaN	NaN	-2.22427	-1.77959	NaN	-2.03956	NaN	-1.80218	-0.429115	NaN	NaN	NaN	-2.57169	NaN	NaN	NaN	NaN	NaN	-0.392466
TOP1	DNA topoisomerase 1		30	46.4	323.31	18326000000	5.23342	5.3718	6.05386	4.3945	4.49328	5.26764	4.76269	4.57195	3.9659	6.41521	6.06157	6.76269	3.41999	4.29187	3.42358	6.14513	6.03672	6.02694	4.27828	4.62772	4.88542	5.7138	5.42404	6.78484	5.59115	4.92502	5.38204	5.0707	5.15236	5.4254	5.51302	5.19931	4.4195	6.11449	6.0553	5.50437	5.9657	5.7613	4.7139	5.35242	6.17627	5.95185	4.339
TOP			13	9.7	132.21	1078000000	0.146296	0.196064	0.084877	-0.580236	1.95273	0.457369	1.18655	0.493988	0.2817	1.32612	3.77187	2.20293	NaN	-0.754417	-1.28806	0.942024	1.81134	0.949829	0.898569	0.716923	-0.322987	1.00561	2.68843	2.8661	-0.0100975	1.4614	0.704285	0.092165	1.70653	0.79586	0.144991	-0.0569859	-0.891077	2.15567	0.467344	0.827091	0.277533	0.337151	0.366917	1.86268	1.02198	0.41573	-1.03935
PC	Pyruvate carboxylase, mitochondrial;Pyruvate carboxylase		49	53.7	323.31	19978000000	4.74089	5.25206	6.45645	4.55098	4.85772	4.84189	5.26638	5.30362	3.97452	5.87465	6.2043	6.83656	1.36535	4.60398	0.925644	6.20992	6.0241	5.85166	4.56218	5.84512	5.21382	5.31257	6.0516	5.87327	5.05503	5.47947	5.41481	5.19641	5.56972	5.82028	5.85083	5.43066	4.27578	5.76894	5.8127	4.82936	5.87341	6.06968	6.05427	4.399	5.94146	5.5066	3.6812
PRPS2	Ribose-phosphate pyrophosphokinase 2		1	18.6	7.4088	76748000	NaN	NaN	-1.43188	-1.88839	-1.84597	-1.94467	NaN	-2.28714	-1.7451	NaN	NaN	NaN	NaN	NaN	NaN	NaN	NaN	NaN	NaN	NaN	NaN	NaN	-3.41146	NaN	NaN	NaN	-1.5403	-1.33337	-1.83648	-1.82171	NaN	NaN	NaN	NaN	NaN	NaN	NaN	NaN	NaN	NaN	NaN	NaN	-0.0918827
PABPC1	Polyadenylate-binding protein 1;Polyadenylate-binding protein;Polyadenylate-binding protein;Polyadenylate-binding protein;Polyadenylate-binding protein		3	15.1	35.521	343760000	NaN	-0.492687	-0.579082	-0.751755	-0.00689697	-0.150133	-0.349131	-0.136641	0.855356	-0.867914	-1.44507	-1.01074	NaN	-2.29948	NaN	-0.421114	-1.19962	-1.57268	-0.204609	-1.57867	0.244198	-0.782373	-1.74573	-0.344383	-1.20545	-1.73632	-0.998222	-0.655859	-1.12308	-0.269159	NaN	-1.89736	-0.703182	-1.16455	-0.945297	-1.3229	-0.810169	-1.93011	NaN	-0.834124	-1.20891	-1.23412	-0.00590897
PCNA	Proliferating cell nuclear antigen;Proliferating cell nuclear antigen;Proliferating cell nuclear antigen;Proliferating cell nuclear antigen;Proliferating cell nuclear antigen;Proliferating cell nuclear antigen		8	41	86.177	1197400000	0.398643	-0.0948849	1.66703	2.40866	2.43562	1.78793	1.82453	2.38379	2.57047	-0.725008	NaN	-0.290714	-1.29383	-0.613546	NaN	NaN	NaN	NaN	1.91273	0.0780773	1.13899	-0.559256	-0.886173	-0.479765	0.434082	0.0209904	1.46115	2.17349	1.26454	0.595915	-0.987474	-0.512917	2.90147	-0.637014	-0.967548	-0.563574	0.52916	NaN	NaN	-0.758926	-0.899467	-1.2889	2.71099
SLC25A4	ADP/ATP translocase 1		7	45	109.37	2774100000	1.27108	1.81224	2.59526	3.80858	4.27136	2.98609	1.75678	2.174	1.8434	1.52142	1.1477	0.590063	NaN	1.3767	-1.22323	-0.566351	-0.683479	-1.84078	3.49622	2.33573	2.83161	1.46166	2.85345	0.988924	-1.4334	2.33137	2.60013	1.00015	3.08399	2.03859	-1.86199	-0.390251	1.88181	-0.34866	0.600937	-2.35202	-0.995724	-0.931271	-0.29138	-0.474276	-0.210762	NaN	-0.367641
IMPDH2	Inosine-5'-monophosphate dehydrogenase 2		2	4.9	10.938	43177000	-2.53642	NaN	-3.42224	-2.34369	-3.05536	-3.01291	-2.34075	-2.72606	-2.78719	NaN	NaN	NaN	NaN	NaN	NaN	NaN	NaN	NaN	-3.00311	NaN	-3.55903	NaN	NaN	NaN	-3.36572	NaN	-2.3664	-2.99169	-3.369	NaN	NaN	NaN	-2.43406	NaN	-2.97648	-2.77374	NaN	NaN	NaN	NaN	NaN	NaN	-2.2874
CKB	Creatine kinase B-type		12	54.6	227.06	3304700000	2.46027	1.8125	3.11384	2.64976	2.78561	1.8831	3.57086	2.79382	2.91958	3.83169	2.76614	3.10032	2.08448	0.405231	0	3.07724	2.65295	1.55405	2.75949	2.01681	2.11109	2.79492	2.6759	2.99514	3.63376	1.92606	1.95855	3.54305	3.00634	2.02582	2.85581	1.31634	1.71552	3.90256	2.83067	3.35764	4.22071	2.23275	0.29917	3.1618	3.52362	3.43128	3.37879
gag			6	58.3	98.281	946570000	NaN	NaN	NaN	NaN	NaN	NaN	NaN	NaN	NaN	NaN	NaN	NaN	NaN	NaN	NaN	NaN	NaN	NaN	NaN	NaN	NaN	NaN	NaN	NaN	NaN	NaN	NaN	NaN	NaN	NaN	NaN	NaN	NaN	NaN	NaN	NaN	NaN	NaN	NaN	NaN	NaN	NaN	NaN
SRC	Proto-oncogene tyrosine-protein kinase Src	+	33	83.8	323.31	125000000000	-7.88756	-8.53093	-10.3308	-10.493	-11.0313	-10.5719	-7.91214	-9.90536	-9.62654	NaN	NaN	NaN	-9.69182	NaN	NaN	NaN	NaN	-9.46203	-10.5673	-9.85737	-9.17216	NaN	NaN	NaN	NaN	NaN	NaN	-10.2118	NaN	NaN	-6.756	-7.09961	-7.53565	NaN	NaN	NaN	-9.36931	-9.32141	NaN	NaN	NaN	NaN	NaN
PEPD	Xaa-Pro dipeptidase		1	20	6.8787	62609000	-1.6793	-3.11882	-3.41544	-2.62127	-2.54707	NaN	-2.05758	-2.78942	-4.11389	-2.09141	-2.2413	-2.65747	-3.62344	NaN	NaN	-2.30334	NaN	NaN	-2.82898	-2.99882	-3.58675	-1.93558	-2.58013	-2.05087	NaN	NaN	-2.99402	NaN	-2.7441	NaN	-3.05504	-2.73759	-1.87298	NaN	NaN	-2.7381	-1.95742	-2.27444	NaN	NaN	-3.63444	NaN	NaN
XRCC6	X-ray repair cross-complementing protein 6		21	41.4	313.9	4398000000	2.5637	2.65846	3.88156	3.52386	4.59021	3.73186	2.53589	3.63877	4.10812	0.891464	0.86454	0.963417	-1.70133	0.128103	-2.21792	0.399279	0.710264	-1.79663	3.73011	2.70202	3.07301	1.11142	1.14983	1.88636	1.05929	1.98378	2.38868	3.73876	3.1757	3.05608	0.731108	-1.00636	2.32946	2.96016	2.68096	1.14196	-0.271624	-1.05149	-1.39133	0.991819	0.592045	0.159309	3.58257
XRCC5	X-ray repair cross-complementing protein 5		18	32.5	226.4	1759800000	0.940447	1.22622	0.263939	2.08983	3.95919	3.28701	2.00658	1.77497	3.57603	-0.185316	-0.25816	-0.588058	NaN	-1.34491	NaN	NaN	NaN	NaN	1.96767	-0.959406	0.453112	-0.870546	0.367903	-0.802847	0.0208511	1.20596	1.60374	2.15992	1.99186	2.03054	NaN	-0.46908	2.67236	0.860281	0.250166	NaN	-2.10136	NaN	NaN	-0.777164	-1.09496	NaN	2.46685
RNH1	Ribonuclease inhibitor		2	7.4	11.68	25685000	NaN	NaN	-1.06034	NaN	-3.66261	-1.47617	NaN	NaN	NaN	NaN	NaN	NaN	NaN	NaN	NaN	NaN	NaN	NaN	NaN	NaN	NaN	NaN	NaN	NaN	NaN	NaN	NaN	NaN	NaN	NaN	-0.146049	NaN	-1.39671	NaN	NaN	NaN	NaN	-0.00926971	NaN	NaN	NaN	NaN	-1.82087
EEF2	Elongation factor 2		37	51.4	323.31	10590000000	3.60862	3.98332	4.50056	4.9684	5.35411	5.27899	5.10159	5.14253	6.12661	2.93666	2.0973	2.93047	0.210279	1.026	-0.226086	1.30069	1.26368	0.301468	4.94171	4.10898	4.30262	2.47947	2.43918	2.05275	2.29773	2.98961	4.76688	4.73386	4.23942	4.58129	2.29098	3.92215	5.57086	3.81894	3.54815	2.27207	3.71299	3.26682	0.137981	2.32034	1.86682	1.39075	5.13791
PDIA4	Protein disulfide-isomerase A4		6	11.6	41.228	431380000	-0.636066	-1.2288	-1.15996	-0.282677	0.29261	-0.140779	0.765238	0.405748	1.68931	-0.936853	NaN	NaN	NaN	NaN	NaN	NaN	NaN	NaN	0.893127	0.65801	0.0762043	-0.666733	-0.260483	NaN	NaN	-0.993744	-0.644861	-0.07934	-1.04723	-0.285614	-0.475128	NaN	-0.595463	-1.44594	NaN	-2.38543	-0.603024	NaN	NaN	NaN	NaN	-0.632879	0.633318
ETFA	Electron transfer flavoprotein subunit alpha, mitochondrial		2	13.8	26.613	55352000	NaN	NaN	NaN	NaN	-0.939068	NaN	NaN	NaN	NaN	NaN	NaN	NaN	NaN	NaN	NaN	NaN	NaN	NaN	NaN	NaN	NaN	NaN	NaN	NaN	NaN	-1.71521	NaN	NaN	NaN	NaN	NaN	NaN	-1.42977	NaN	NaN	NaN	NaN	NaN	NaN	NaN	NaN	NaN	-1.30726
MIF	Macrophage migration inhibitory factor		3	35.7	24.835	2097300000	1.28888	0.862692	2.96203	2.01364	1.94964	2.14011	1.74217	2.15274	2.68463	0.438694	-0.02915	0.571142	0.435196	0.692537	0.0998917	-1.16324	0.85594	0.656837	2.08347	2.40727	3.06156	0.577169	0.436747	0.904102	1.48782	1.62449	3.21864	2.39878	2.28672	2.80679	0.373436	0.479866	2.16288	2.17129	1.64075	0.676163	1.76029	0.628239	-0.451786	2.9301	1.01651	0.760065	3.16762
AKR1A1	Alcohol dehydrogenase [NADP(+)]		1	8.4	7.0152	73027000	NaN	NaN	NaN	NaN	-0.0865211	-0.420294	NaN	NaN	NaN	NaN	NaN	NaN	NaN	NaN	NaN	NaN	NaN	NaN	NaN	NaN	NaN	NaN	NaN	NaN	NaN	NaN	-1.2147	-0.895636	NaN	NaN	NaN	NaN	NaN	NaN	NaN	NaN	NaN	NaN	NaN	NaN	NaN	NaN	-1.1315
PKM	Pyruvate kinase PKM;Pyruvate kinase;Pyruvate kinase;Pyruvate kinase;Pyruvate kinase		39	82.1	323.31	28002000000	4.96165	4.689	5.89438	6.4975	6.22072	6.29205	5.18135	5.42432	6.00244	4.37987	3.00608	3.69132	0.85243	2.13634	2.20195	3.31742	2.96899	1.56739	6.20301	4.80442	5.76324	5.03187	3.98415	4.29082	3.90384	5.04741	6.23535	6.47392	6.03139	6.51287	2.99765	4.2248	5.17275	4.0045	4.05943	2.9509	3.68064	3.42002	2.55108	3.38624	3.4697	2.32198	6.9273
HSP90B1	Endoplasmin		11	21.2	116.63	1046600000	0.671648	1.36323	1.2717	1.49276	3.23805	1.91585	1.46331	1.67949	0.0738411	-0.562311	-0.265093	-2.46649	0.285221	-1.81938	NaN	-1.95217	-2.1406	NaN	0.912539	0.760344	0.231426	-0.0209465	0.20443	-1.25917	0.207283	0.118176	0.853281	1.41291	1.11234	0.303585	-2.05184	0.112305	1.65842	0.528339	-0.307859	-0.723349	0.339598	-1.64179	NaN	-1.17097	-0.417503	-0.658436	1.10545
SNRPB	Small nuclear ribonucleoprotein-associated proteins B and B';Small nuclear ribonucleoprotein-associated protein;Small nuclear ribonucleoprotein-associated protein;Small nuclear ribonucleoprotein-associated protein;Small nuclear ribonucleoprotein-associated protein		6	32.5	63.296	691300000	-1.98942	-0.26193	-0.0818634	-0.432455	0.332245	-0.319517	-1.42216	0.749582	0.737816	NaN	-2.24176	NaN	NaN	NaN	NaN	NaN	NaN	NaN	NaN	-1.09856	0.116673	-1.84805	NaN	NaN	NaN	-0.456118	2.365	0.742634	1.49665	1.66653	NaN	-0.576054	-0.936098	NaN	-1.53521	NaN	NaN	-1.5219	NaN	NaN	NaN	NaN	1.10421
HNRNPL	Heterogeneous nuclear ribonucleoprotein L		18	38.4	323.31	5897600000	2.9001	3.00348	3.2602	4.0409	4.41608	4.54924	3.3525	3.33207	4.45737	1.86419	2.8341	1.70572	-2.12139	-0.205879	-2.18731	1.36074	1.19929	0.0577316	3.38984	3.48469	3.3703	1.92461	2.54499	1.65589	1.31584	3.54933	4.19242	3.77542	3.87687	4.2583	0.968336	1.47937	3.30764	2.71851	2.6461	0.926517	1.136	0.950115	1.05956	2.2139	2.76782	1.16572	4.69064
DARS	Aspartate--tRNA ligase, cytoplasmic		14	34.7	92.962	698240000	0.319269	0.476	0.944462	1.228	1.87315	1.40294	0.169676	0.612417	1.37183	-0.133722	-1.54091	NaN	NaN	-0.655123	NaN	NaN	NaN	NaN	2.38197	0.375469	0.273653	0.014349	NaN	NaN	NaN	0.087923	0.81793	-0.567528	-0.0957413	0.454897	NaN	-1.16189	0.368454	NaN	-0.459219	NaN	NaN	NaN	NaN	NaN	NaN	NaN	-0.503155
AKR1B1	Aldose reductase		3	15.2	18.63	191250000	-0.818476	-2.38434	-1.60665	-1.61119	-0.346508	-0.100182	-1.30244	-1.12228	-1.09519	NaN	-3.81832	NaN	NaN	NaN	NaN	NaN	NaN	NaN	-1.99442	-2.76511	-2.33249	NaN	-3.10368	-1.98846	NaN	-1.95102	-1.04061	-1.92204	-2.18615	0.645391	NaN	-1.62261	-0.773293	NaN	NaN	NaN	-2.37553	-2.61274	NaN	NaN	NaN	NaN	-1.00293
GSPT1	Eukaryotic peptide chain release factor GTP-binding subunit ERF3A		2	7.2	12.617	45230000	-2.35532	NaN	-3.13812	-3.35035	-3.04389	-3.77242	-2.6148	-2.91319	-1.47616	-3.57652	NaN	NaN	NaN	NaN	NaN	NaN	NaN	NaN	-0.842312	NaN	-3.57277	NaN	-4.16355	-4.10948	NaN	NaN	NaN	NaN	-4.10307	NaN	NaN	NaN	NaN	NaN	-3.10001	NaN	NaN	NaN	NaN	NaN	NaN	NaN	-2.75903
EZR	Ezrin		9	31.6	71.821	345480000	-0.214296	-1.38519	-1.12591	-0.0351009	1.44901	0.231405	0.000104904	-0.297167	-0.174309	-0.0871162	-0.818216	-1.65149	NaN	NaN	NaN	-1.53796	NaN	NaN	-0.444054	NaN	NaN	-0.949589	NaN	NaN	-1.29377	0.120703	-0.298594	-0.960026	-0.828968	-0.0588455	-1.87174	NaN	0.26844	0.509106	NaN	-0.2607	-1.03207	NaN	NaN	-1.01582	-0.0627136	0.324877	0.924042
RPS2	40S ribosomal protein S2		9	38.2	69.694	1624000000	0.514338	0.187593	1.14838	1.86893	1.95608	1.30849	2.22613	2.37047	3.30749	-0.238827	-2.27232	-1.61588	NaN	-1.5067	NaN	-1.70515	-1.95995	-2.66039	3.23011	-0.169001	2.25051	0.587467	-0.213135	-1.25152	-0.446423	1.48078	1.95447	3.11281	2.51276	2.30956	NaN	-0.54237	2.03066	-0.480867	-0.213409	-1.38232	-0.234522	-1.09833	NaN	-0.150024	-1.17239	-2.02081	2.91294
RPA2	Replication protein A 32 kDa subunit		2	11.1	11.378	43967000	NaN	NaN	NaN	-1.77264	-2.30116	-1.92453	NaN	NaN	NaN	NaN	NaN	NaN	NaN	NaN	NaN	NaN	NaN	NaN	NaN	NaN	NaN	NaN	NaN	NaN	NaN	-2.44361	-1.81289	-1.9991	NaN	NaN	NaN	NaN	NaN	NaN	NaN	NaN	NaN	NaN	NaN	NaN	NaN	NaN	-0.50301
CBR1	Carbonyl reductase [NADPH] 1		5	24.9	41.214	121920000	NaN	NaN	-1.14142	-0.403938	-1.78634	-1.63261	NaN	NaN	-3.03236	NaN	NaN	NaN	NaN	NaN	NaN	NaN	NaN	NaN	-1.79452	NaN	NaN	NaN	NaN	NaN	NaN	NaN	-1.21756	0.330276	NaN	-0.697886	NaN	NaN	-0.906261	NaN	NaN	NaN	NaN	NaN	NaN	-0.259691	NaN	NaN	2.42592
HIST1H1C	Histone H1.2		3	39.4	44.953	1760100000	0.480051	2.2133	3.35136	-0.163656	0.813597	0.611486	1.64873	1.54828	1.77282	2.31387	3.3441	2.36197	0.403368	2.65965	0.530775	1.2591	1.24276	1.28118	2.98535	1.77743	2.82945	0.932837	2.06565	1.06697	1.7388	1.69315	0.608456	0.000486374	1.41551	0.882105	1.49552	0.80336	0.624575	2.0843	1.3719	-0.273243	2.81415	2.37498	2.79961	1.1138	1.71856	0.454781	-0.560608
ATP2A2	Sarcoplasmic/endoplasmic reticulum calcium ATPase 2		4	6.2	34.579	173770000	-0.81287	-1.185	-1.56492	0.972464	0.384178	-1.06109	NaN	-1.02421	-1.52729	NaN	-1.81544	NaN	NaN	NaN	NaN	NaN	NaN	NaN	-0.829519	-1.82294	-0.229624	-1.53203	NaN	-1.83615	NaN	-1.79051	-0.895493	-1.93009	-2.52584	-1.9451	NaN	NaN	-1.18483	NaN	NaN	NaN	NaN	NaN	NaN	NaN	NaN	NaN	-1.46479
HSPA7	Putative heat shock 70 kDa protein 7		1	14.3	11.802	787140000	1.64213	0.415609	1.14535	1.18188	1.03646	0.943624	1.58117	1.4377	1.49339	1.37036	NaN	NaN	0.828487	0.51058	-0.934624	NaN	NaN	NaN	1.60526	0.47348	0.365541	0.81587	NaN	NaN	0.714396	NaN	1.07884	NaN	0.453856	NaN	0.27986	NaN	1.77721	0.947695	NaN	0.645552	1.92049	0.987967	NaN	NaN	NaN	NaN	2.50095
HMGA1	High mobility group protein HMG-I/HMG-Y		1	38.3	72.54	837520000	1.02672	1.76227	0.742125	-0.954742	1.01209	0.91197	0.946423	NaN	NaN	2.47048	2.92047	2.66235	NaN	-0.25144	NaN	1.10942	2.6209	1.58764	0.860142	NaN	0.962366	0.632399	2.04157	2.12214	0.0465584	-0.930275	-0.492958	-0.057272	1.71384	-0.00242043	-0.180382	-0.18222	-0.709749	2.24099	2.3714	-0.267069	-0.0818539	1.12336	-0.144188	0.696321	1.66177	0.102386	-1.20904
HMGA1	High mobility group protein HMG-I/HMG-Y		1	31.2	6.3909	141840000	NaN	NaN	NaN	NaN	NaN	NaN	NaN	-1.37479	NaN	0.175844	1.58596	0.138388	NaN	NaN	NaN	0.222532	-0.0721817	-0.145599	NaN	NaN	NaN	0.350838	0.768175	0.188177	-0.248812	NaN	NaN	NaN	0.0994511	-0.0534725	NaN	NaN	NaN	-0.67038	-0.0963459	NaN	NaN	NaN	NaN	NaN	0.345594	-1.5264	NaN
GOT1	Aspartate aminotransferase, cytoplasmic		3	13.6	30.948	111370000	-1.28379	NaN	NaN	-1.34064	-0.5369	-1.05376	NaN	NaN	0.0294724	NaN	NaN	NaN	NaN	NaN	NaN	NaN	NaN	NaN	NaN	NaN	-2.20949	NaN	NaN	NaN	NaN	NaN	-1.82162	-1.27235	-0.664648	-1.16546	NaN	NaN	-1.56926	NaN	NaN	NaN	NaN	NaN	NaN	NaN	NaN	NaN	-0.0754719
CTPS1	CTP synthase 1		1	2	6.754	13773000	NaN	NaN	NaN	NaN	NaN	NaN	NaN	NaN	-1.72165	NaN	NaN	NaN	NaN	NaN	NaN	NaN	NaN	NaN	NaN	NaN	NaN	NaN	NaN	NaN	NaN	NaN	-2.69473	-2.54497	NaN	NaN	NaN	NaN	NaN	NaN	NaN	NaN	NaN	NaN	NaN	NaN	NaN	NaN	-1.74929
DDX5	Probable ATP-dependent RNA helicase DDX5		2	9.5	10.952	137310000	NaN	-1.62015	-1.38243	-1.55763	-1.88873	-2.26381	-1.70815	-1.64796	-1.87808	-1.84526	-2.34341	NaN	NaN	NaN	NaN	NaN	NaN	NaN	-0.715427	-1.72468	-1.7178	-2.44236	-2.35586	NaN	NaN	-2.07987	-1.31291	-1.65368	-1.80458	-1.72554	NaN	NaN	-1.95671	-2.08087	-1.60841	NaN	-2.12642	NaN	NaN	-1.77666	-2.04468	NaN	-1.76193
TCPA			26	61.3	323.31	5849400000	2.22002	2.95951	4.15822	4.8813	4.80581	5.03262	3.60868	4.08471	4.39361	1.34476	1.58942	2.19306	NaN	0.754309	-1.046	0.966856	-0.503487	-0.948204	4.14217	2.58232	3.70285	1.64935	1.4161	1.30011	2.18538	2.04882	4.35779	4.00604	3.841	3.82106	0.878984	2.8637	4.49869	1.38167	1.60103	-1.50191	1.87468	-0.670408	-2.3197	0.652922	0.678583	-1.08481	3.09428
RPL3	60S ribosomal protein L3		4	49.1	22.662	213080000	-0.518118	-1.05103	-1.70308	NaN	0.0157223	0.143797	-0.810314	NaN	0.336403	NaN	NaN	NaN	NaN	NaN	NaN	NaN	NaN	NaN	-2.21284	-0.901035	-1.45638	NaN	NaN	NaN	NaN	-1.0751	0.459953	-1.89229	-1.42221	-0.472719	NaN	NaN	-0.608931	NaN	NaN	NaN	NaN	NaN	NaN	NaN	NaN	NaN	-1.62204
RPL7	60S ribosomal protein L7		5	31.2	57.912	781010000	-0.673134	0.569923	0.74836	1.55462	1.32758	1.01909	-0.124134	0.803102	1.07303	0.180613	0.19492	-1.23544	-0.0415707	0.217194	-0.746687	-0.869717	-1.19573	NaN	1.07572	0.609562	0.913685	0.63427	0.0104847	-0.399204	-0.917618	-1.26594	1.84623	0.625334	0.0776711	1.21934	-1.4611	-0.889906	0.198847	-0.123142	0.574135	-1.04265	0.132837	0.0901546	-0.603996	NaN	-0.554106	-1.10516	-0.187679
SON	Protein SON		6	3.7	45.233	484940000	NaN	0.460764	-2.17841	NaN	-1.43671	NaN	NaN	-0.579458	NaN	NaN	2.8007	-2.67846	NaN	1.08772	NaN	NaN	NaN	NaN	-0.136349	2.58801	1.37833	NaN	2.61901	NaN	NaN	1.54876	NaN	NaN	NaN	NaN	-0.901655	-1.5773	NaN	NaN	0.306015	NaN	NaN	-1.64091	NaN	NaN	-1.63965	NaN	NaN
RPL17	60S ribosomal protein L17		3	38	19.704	214730000	-1.08063	-0.97171	-1.23213	NaN	-0.731821	-1.24851	-1.33585	-1.09194	-0.910706	NaN	-1.74105	-1.2079	NaN	NaN	NaN	NaN	NaN	-2.36341	-0.530766	-1.10599	-1.39775	-1.23215	-2.0587	-1.27292	NaN	-1.22129	-1.44302	-1.43687	-0.615574	-1.33482	NaN	NaN	-1.38704	-0.805105	-0.694077	NaN	-0.742283	NaN	NaN	-0.905128	-1.86305	NaN	-1.20904
PGAM4	Probable phosphoglycerate mutase 4		6	36.6	88.241	765420000	-0.324659	-0.824978	0.46315	1.06714	0.337936	0.662926	0.9526	0.874092	1.33814	0.144426	-1.0261	0.218782	-0.0530987	-0.464848	-0.98225	0.581274	1.06262	0.852043	1.45541	-1.1201	-0.0631943	-0.256386	-0.776775	-1.08291	0.143921	-0.228407	0.689142	0.836128	-0.118113	1.18867	NaN	-0.544262	0.971935	0.643028	0.0182438	0.163494	0.0192528	-0.507725	NaN	-0.998577	-0.772486	-1.09447	1.73636
RCC1	Regulator of chromosome condensation		3	27	66.065	206080000	-0.458223	-1.85682	-1.63614	-0.489691	-0.904119	-0.658234	-0.0667496	-1.39336	0.346401	NaN	NaN	NaN	NaN	NaN	NaN	NaN	NaN	NaN	-0.467709	-1.44609	-1.66015	NaN	NaN	NaN	NaN	-0.745764	-1.59752	-1.11822	-1.43437	-0.962669	NaN	NaN	-1.60007	-1.72959	NaN	NaN	-2.17046	NaN	NaN	NaN	NaN	NaN	-0.697847
NCL	Nucleolin		3	12.1	16.58	698490000	0.151213	1.03154	0.108589	-0.260014	0.367769	0.653067	0.0936928	-0.483694	-1.22141	0.250425	3.38367	0.427011	-0.575354	1.34646	0.370237	0.469692	0.863039	0.807842	-0.477331	0.692266	-0.766396	0.727695	3.03075	1.63488	0.856081	1.35699	0.992327	-0.4886	1.90854	-0.253939	-1.00329	0.140572	-0.0515881	1.31727	1.73309	0.609556	-0.0122948	1.55792	0.490862	1.14145	0.46349	0.183325	-0.857401
HK1	Hexokinase-1;Hexokinase;Hexokinase		2	2.4	10.6	17660000	-2.24386	NaN	NaN	NaN	-2.47241	NaN	NaN	NaN	-0.91115	NaN	NaN	NaN	NaN	NaN	NaN	NaN	NaN	NaN	NaN	NaN	NaN	NaN	NaN	NaN	NaN	NaN	NaN	NaN	NaN	NaN	NaN	NaN	NaN	NaN	NaN	NaN	NaN	NaN	NaN	NaN	NaN	NaN	-2.18226
EIF2AK2	Interferon-induced, double-stranded RNA-activated protein kinase		2	4.9	12.583	49297000	-3.21515	NaN	-1.68461	-2.34221	-2.03307	-2.03167	NaN	NaN	-1.69405	NaN	NaN	NaN	NaN	NaN	NaN	NaN	NaN	NaN	-3.1991	-3.02187	-2.63089	NaN	NaN	NaN	NaN	-3.4878	-2.39221	-3.04699	NaN	NaN	NaN	NaN	-1.90908	NaN	NaN	NaN	NaN	NaN	NaN	NaN	NaN	NaN	-2.35484
SRM	Spermidine synthase		4	17.9	26.516	183710000	NaN	NaN	NaN	-1.06084	-0.280333	-0.216351	-0.875347	-0.577213	0.522192	NaN	NaN	NaN	NaN	NaN	NaN	NaN	NaN	NaN	-0.961226	NaN	-1.22114	NaN	NaN	NaN	NaN	NaN	-1.49548	-0.0717316	-0.380156	-0.662045	NaN	NaN	-1.13628	NaN	NaN	NaN	NaN	NaN	NaN	NaN	NaN	NaN	-0.316874
RAB6A	Ras-related protein Rab-6A		2	19.7	25	649560000	-0.256788	-0.520107	-0.558792	0.542376	0.524815	1.52877	0.0227947	0.796537	1.67132	-2.23159	-0.392305	-1.12843	NaN	-2.77787	NaN	-2.47586	-2.97082	NaN	0.184095	1.28631	1.41983	-0.874031	-1.03601	NaN	NaN	0.133318	0.781046	0.119198	0.700163	1.15631	NaN	-1.45163	-0.835085	-2.62387	NaN	NaN	NaN	NaN	NaN	NaN	NaN	NaN	-0.190544
PSMB1	Proteasome subunit beta type-1		3	18.3	47.834	702650000	NaN	0.580496	NaN	0.0321712	-1.06685	-0.270767	0.940735	NaN	NaN	1.61267	1.04374	1.14347	-0.0430832	0.494898	0.0244846	2.00208	1.43969	0.792185	0.354368	0.734064	NaN	1.35019	0.609594	1.19694	1.6849	0.818199	-0.331383	0.67948	-0.132851	0.591471	1.80885	0.937143	-0.395565	0.767292	1.0941	1.3876	1.62375	1.46486	0.420206	0.141394	NaN	NaN	0.478415
M6PR	Cation-dependent mannose-6-phosphate receptor		2	12.6	13.293	167620000	NaN	NaN	NaN	-0.442867	-1.34962	-0.385677	NaN	NaN	0.233229	NaN	NaN	NaN	NaN	NaN	NaN	NaN	NaN	NaN	-1.15826	NaN	NaN	NaN	NaN	NaN	NaN	NaN	-1.22946	-1.34633	NaN	-0.862825	NaN	NaN	NaN	NaN	NaN	NaN	NaN	NaN	NaN	NaN	NaN	NaN	2.4674
PTN	Pleiotrophin		2	20.5	13.698	239870000	-1.46094	-2.01266	-1.82955	-1.65377	-2.2988	NaN	0.739443	-1.48215	-2.63537	-0.385969	-1.03107	-1.31273	-1.68076	-1.64662	NaN	-1.4545	-1.37529	-1.07416	-1.48831	-2.35287	-3.3404	-0.554285	-0.61001	-1.40747	0.508841	-0.350349	NaN	-1.15652	-0.0933018	-2.18303	-1.34887	-0.889517	-2.10562	-0.324615	-0.779148	0.497595	-1.50932	-1.09237	-1.68839	NaN	0.669741	2.93783	-1.33351
CSRP1	Cysteine and glycine-rich protein 1		2	15.6	12.539	85231000	NaN	NaN	-1.52324	-1.85062	-2.81862	-2.27839	-1.83339	-1.97294	-2.16255	NaN	NaN	-1.97691	NaN	NaN	NaN	NaN	NaN	NaN	-1.89985	NaN	NaN	NaN	-2.39534	-1.51833	-2.20671	NaN	-1.35103	-1.90456	-2.3843	-1.93258	NaN	-1.80624	-2.05693	-1.74662	-1.71247	-1.28805	-1.45329	NaN	NaN	-1.2077	-1.61142	NaN	-1.52216
FLNA	Filamin-A		25	14.6	238.76	2735700000	0.915262	0.471489	2.74039	1.5482	2.66844	1.65357	2.09655	1.6433	2.77565	0.809483	2.58138	0.252626	0.80197	3.01246	1.23982	0.721518	0.051733	0.036768	2.7161	3.22063	2.87594	2.64466	2.8454	-0.285305	1.47326	3.15148	3.91761	2.67756	1.87376	3.29614	0.0457592	1.34286	1.7438	3.44885	3.26396	2.40489	2.04561	0.770134	0.585121	2.72128	0.8533	1.4005	3.36601
MDK	Midkine		3	35.9	77.835	714470000	0.962801	1.16903	-0.945782	0.728573	0.324459	-0.171402	0.522591	0.184427	-0.357758	1.83942	1.9654	1.93127	-0.37042	-0.0415211	-0.913897	1.01467	2.17422	0.905516	-0.156975	-1.18502	0.299816	1.69209	2.08543	1.14045	0.784073	0.590582	-1.14893	0.195772	-0.196146	0.730377	0.926767	0.148903	-0.392443	1.28437	1.40017	1.11638	1.42772	0.69589	0.0144215	0.483112	0.818966	2.29428	0.270323
VDAC1	Voltage-dependent anion-selective channel protein 1		12	60.1	158.64	2244300000	0.739807	1.82641	2.4728	2.99441	3.89702	3.23442	0.828421	1.70097	1.93919	0.220453	0.973669	-0.354158	NaN	-0.610058	NaN	-0.23527	NaN	-0.961256	1.68911	1.98136	2.27857	0.429516	-0.230824	0.380293	-0.0157204	2.03727	1.56045	2.53799	2.86772	3.0442	NaN	0.0291977	1.94876	0.181755	0.85092	NaN	0.395781	-1.47388	-2.08341	NaN	0.182652	-1.38991	2.9928
OSBP	Oxysterol-binding protein 1		1	7.6	9.0356	28661000	NaN	-2.17441	-1.70925	-1.94446	-2.99282	-1.75221	NaN	NaN	NaN	NaN	NaN	NaN	NaN	NaN	NaN	NaN	NaN	NaN	NaN	-2.12279	-1.97944	NaN	NaN	NaN	NaN	NaN	-1.60592	NaN	NaN	NaN	NaN	NaN	NaN	NaN	NaN	NaN	NaN	NaN	NaN	NaN	NaN	NaN	NaN
FBL	rRNA 2'-O-methyltransferase fibrillarin		8	41.8	75.829	743950000	NaN	NaN	-0.460495	0.544277	1.709	2.00484	-1.55381	-0.444559	-0.453465	NaN	-0.441343	NaN	NaN	NaN	NaN	-1.80359	NaN	NaN	0.151999	1.09207	-0.291521	-0.27792	-2.15356	-0.589083	NaN	-0.985655	0.615011	-0.293468	1.08781	1.26284	NaN	NaN	NaN	-1.23826	-1.20329	NaN	NaN	NaN	NaN	NaN	NaN	NaN	-2.53947
GART	Trifunctional purine biosynthetic protein adenosine-3;Phosphoribosylamine--glycine ligase;Phosphoribosylformylglycinamidine cyclo-ligase;Phosphoribosylglycinamide formyltransferase		14	24.6	145.83	558110000	-1.47429	-1.05394	-0.840847	0.0473862	2.43035	1.90899	-1.39436	-0.484465	-0.559593	-2.08891	NaN	-1.08535	NaN	NaN	NaN	NaN	NaN	NaN	0.244898	-0.670654	-0.988993	NaN	NaN	NaN	NaN	-1.84027	-0.117195	-0.000486374	-0.281603	-0.114647	NaN	NaN	-0.764782	-2.56902	NaN	NaN	NaN	NaN	NaN	NaN	NaN	NaN	1.24303
PAICS	Multifunctional protein ADE2;Phosphoribosylaminoimidazole-succinocarboxamide synthase;Phosphoribosylaminoimidazole carboxylase		11	29.9	91.635	495810000	-1.39411	-0.802467	0.565838	0.501358	1.63335	0.906832	0.280075	0.0603237	0.623314	-1.10143	NaN	NaN	NaN	NaN	NaN	NaN	-3.1278	NaN	1.01922	-0.39913	0.604076	-0.607382	-1.55897	-1.21385	-1.83167	-1.30069	0.00802422	0.312696	-0.497793	-0.608431	NaN	-0.979445	0.114487	-1.18303	-1.1581	NaN	-0.681938	-1.68525	NaN	NaN	NaN	NaN	1.43907
UBA1	Ubiquitin-like modifier-activating enzyme 1		11	16.4	85.685	669350000	-1.43462	-0.375336	-2.12873	0.564436	-0.218391	0.348764	-0.257034	0.39896	0.652533	-0.953409	-1.90505	-1.53643	-0.32159	NaN	NaN	-1.99707	-1.61821	NaN	1.64475	-0.599077	-0.309071	-2.06825	-1.02029	-1.79322	-1.05667	-1.24323	-0.834682	1.56718	0.984253	-0.143137	NaN	NaN	-0.788788	-0.390636	-0.421282	-1.4429	0.355986	1.9402	NaN	-0.389084	-1.29776	-1.25635	3.11164
NME1-			3	25.7	22.514	860070000	0.175514	0.989222	0.792685	-0.190382	-0.286766	0.135283	1.30327	1.59543	0.674316	1.25572	-1.13967	-0.18227	-0.703684	-1.08088	NaN	0.474558	0.39559	-0.926222	1.18379	0.0744305	-0.387276	0.958263	0.610073	-0.383158	1.67483	0.591858	-0.37159	0.242794	-0.103415	0.837429	0.784899	0.798506	1.14581	1.40064	1.54555	0.3211	2.30626	2.12152	-1.13184	0.701296	0.476978	0.0160007	1.34342
HNRNPA2B1	Heterogeneous nuclear ribonucleoproteins A2/B1		16	53	212.82	7170400000	3.18586	3.38732	4.36446	2.50468	3.40957	3.78803	3.87843	3.31585	4.09557	3.72604	4.07703	4.04667	3.23373	3.01364	2.02584	3.61669	2.55285	3.1144	3.39134	3.95606	3.47378	3.65304	3.94972	3.22194	4.13184	3.83147	3.33814	3.13116	3.25291	3.56693	3.83154	3.66715	3.90791	3.7223	3.76309	4.54437	3.89145	2.82888	3.8246	3.83871	4.04313	3.71152	3.49586
SFPQ	Splicing factor, proline- and glutamine-rich		8	17.1	93.925	967470000	0.66983	1.20174	1.12223	0.753328	1.08127	0.211975	0.763397	0.973186	0.26343	1.2445	0.918339	0.859228	NaN	0.655697	NaN	0.93631	1.02234	0.996346	0.394491	0.0652924	0.600592	0.457165	1.6953	0.873953	1.10509	0.819574	1.04474	0.51939	1.24575	0.414598	0.503212	0.801729	0.873653	0.608866	0.920374	0.85494	1.73529	0.693918	0.924095	0.738504	1.68192	0.602442	-0.49316
PPIB	Peptidyl-prolyl cis-trans isomerase B		11	55.6	121.2	4221900000	2.20994	2.96233	3.03697	3.87093	3.37927	3.25976	3.46896	2.88254	2.99621	3.64592	2.72881	4.39035	1.61403	2.9265	1.63916	3.95927	3.08789	2.9153	2.68919	2.29422	2.32657	3.84628	2.4451	3.75296	4.32463	2.08324	3.05751	3.73045	3.69078	3.49382	3.64467	2.53855	2.99948	3.26534	2.69176	3.274	4.13235	3.90441	2.32696	2.65925	3.71784	3.35216	3.84795
WARS	Tryptophan--tRNA ligase, cytoplasmic;T1-TrpRS;T2-TrpRS		3	27.6	21.171	30001000	NaN	NaN	NaN	NaN	-1.66143	-2.01784	NaN	NaN	NaN	NaN	NaN	NaN	NaN	NaN	NaN	NaN	NaN	NaN	NaN	NaN	NaN	NaN	NaN	NaN	NaN	NaN	NaN	NaN	NaN	NaN	NaN	NaN	NaN	NaN	NaN	NaN	NaN	NaN	NaN	NaN	NaN	NaN	-1.7218
RPS3	40S ribosomal protein S3		16	73.3	172.28	3912500000	1.20151	1.84942	2.8457	3.76458	3.94725	4.14674	2.32967	2.98707	3.75507	0.73761	0.459528	0.729963	NaN	-0.989677	NaN	-0.91087	-0.199724	NaN	3.40816	2.80866	3.12988	1.83941	0.694576	0.260075	-1.59219	2.73417	3.77171	3.34467	3.32234	4.01008	-3.58905	2.64647	2.99401	1.13203	1.3488	-1.91999	0.524858	0.960325	-0.800592	0.570049	-0.232718	-1.42897	2.26156
AHCY	Adenosylhomocysteinase;Adenosylhomocysteinase		17	45.6	120.8	1935000000	1.4305	2.06771	2.0336	2.99978	3.42781	3.53676	1.47195	1.97176	2.31439	-0.115425	0.646881	0.717482	NaN	-2.35096	NaN	-0.946617	-0.511763	-2.13156	2.41164	-0.526209	2.24718	0.4599	-0.199184	0.384966	-2.28756	0.82395	2.63958	2.06312	2.04808	2.29698	0.370205	1.1483	3.78841	0.0972652	0.0720005	-0.941048	0.739908	0.0146198	-0.802773	0	0.702181	-1.72625	1.96969
HIST1H2BO	Histone H2B type 1-O		0	63.5	13.506	863780000	0.545683	2.67202	0.219179	-1.20135	1.4657	0.0699635	-1.42286	-1.14493	-0.891113	0.653698	3.52947	0.743402	NaN	0.230906	NaN	-0.138159	0.936729	0.713896	-0.957899	1.04496	-0.97937	-0.764801	3.204	2.35593	1.18812	0.61113	1.32296	-0.706604	1.93295	-0.827768	-0.270292	NaN	NaN	0.872627	0.753065	-0.426922	-0.66258	0.533718	-0.967949	0.610258	1.13013	0	-1.66702
CFL1	Cofilin-1		6	49.4	125.64	1320000000	1.24583	1.25077	1.71218	1.68389	1.53385	1.90075	1.83435	1.60268	2.18297	0.524971	-0.502275	-0.408989	-0.258347	0.656626	-0.928146	-0.105644	-0.294422	-1.73483	1.57277	1.37692	1.38689	0.31464	-0.285999	-0.169731	-0.0984325	1.18373	1.9532	2.1884	1.47354	1.56277	1.26265	0.742149	1.88601	0.254675	0.756145	0.323929	1.67369	0.444084	-0.831224	1.2869	0.463421	0.522413	3.0581
EIF4B	Eukaryotic translation initiation factor 4B		1	4.7	6.3025	18273000	-2.4995	NaN	NaN	NaN	NaN	NaN	-2.74989	-2.92111	NaN	NaN	NaN	NaN	-3.04885	-3.58915	NaN	NaN	NaN	NaN	-2.95855	-3.40421	-4.26418	NaN	NaN	NaN	NaN	NaN	NaN	NaN	NaN	NaN	-3.03304	-2.45495	NaN	NaN	NaN	NaN	-2.28081	-3.00493	NaN	NaN	NaN	NaN	NaN
RRM1	Ribonucleoside-diphosphate reductase large subunit;Ribonucleoside-diphosphate reductase		3	4.4	17.359	107980000	NaN	-1.68147	NaN	-1.96995	-1.14157	-1.50241	-1.83501	-1.80438	-1.47906	NaN	NaN	NaN	NaN	NaN	NaN	NaN	NaN	NaN	-2.01711	-2.75808	-3.16138	NaN	NaN	NaN	NaN	-1.9587	-2.05437	-1.65085	NaN	-1.80546	NaN	NaN	-1.62196	NaN	-2.05526	NaN	NaN	NaN	NaN	-2.34821	-2.25939	-2.07501	-1.57241
ATP5F1	ATP synthase F(0) complex subunit B1, mitochondrial		1	8.7	6.8307	31617000	NaN	NaN	-3.38783	-2.38413	-3.11893	-3.00863	-3.35833	-3.08603	-3.34681	-2.50917	NaN	NaN	NaN	NaN	NaN	NaN	-3.24803	NaN	-1.65769	NaN	-2.91473	-2.57431	-2.74943	NaN	NaN	NaN	NaN	NaN	NaN	NaN	NaN	NaN	NaN	NaN	-2.65412	NaN	NaN	NaN	NaN	NaN	NaN	NaN	-3.29521
ACAT1	Acetyl-CoA acetyltransferase, mitochondrial		5	16.2	44.71	124510000	NaN	NaN	NaN	-1.12248	-0.862179	-1.35818	-1.06691	NaN	-2.44768	NaN	NaN	NaN	NaN	NaN	NaN	NaN	NaN	NaN	-2.38431	-2.88128	NaN	NaN	-1.84826	NaN	NaN	-1.50062	-1.81935	-0.681255	-0.685652	-1.60488	NaN	NaN	NaN	NaN	NaN	NaN	NaN	NaN	NaN	NaN	-2.67932	NaN	0.499533
MCM3	DNA replication licensing factor MCM3		3	5.7	22.255	185310000	NaN	-2.42477	-1.05182	0.247936	-1.35395	-0.283379	NaN	NaN	0.272652	NaN	NaN	NaN	NaN	NaN	NaN	NaN	NaN	NaN	-0.250294	NaN	NaN	NaN	NaN	NaN	-2.70366	-2.30543	-0.818167	0.0951881	-0.448236	-1.64673	NaN	NaN	NaN	NaN	NaN	-3.31446	NaN	NaN	NaN	NaN	NaN	NaN	0.0369053
RPS12	40S ribosomal protein S12		7	77.3	107.28	794950000	NaN	0.155851	-0.808996	-0.101225	0.167786	-0.37812	0.615803	-0.657003	1.69284	NaN	NaN	-1.94495	-1.15913	NaN	NaN	NaN	NaN	-1.9046	-0.356329	-1.64902	NaN	-1.59619	NaN	-1.61813	-0.561724	-0.651958	1.24015	1.35589	1.77584	-1.40056	NaN	NaN	NaN	-0.649384	-2.2265	NaN	NaN	NaN	NaN	-0.0195847	NaN	-1.11699	3.72769
ATP5A1	ATP synthase subunit alpha, mitochondrial		23	51.5	323.31	7493700000	3.44962	3.96422	4.70746	4.18661	4.80648	4.73608	3.83936	4.83161	5.02736	2.1122	2.40399	2.21021	-1.79054	-0.736591	-0.16424	1.45915	1.5686	0.772326	3.80572	3.57258	3.89022	2.50736	2.47917	1.77436	3.03705	3.47555	4.39877	4.78091	4.30266	4.43722	2.91013	2.92965	4.56474	2.58449	2.62282	0.93038	3.19159	2.5443	1.05926	1.84661	2.33828	1.55642	4.91719
PSMA2	Proteasome subunit alpha type-2;Proteasome subunit alpha type		6	42.7	88.808	513280000	0.306566	-1.08098	-1.0898	0.762114	1.76691	1.48513	NaN	-0.105732	1.12152	NaN	NaN	NaN	NaN	NaN	NaN	NaN	NaN	NaN	-1.37162	-1.53846	NaN	-1.7341	-1.98633	NaN	-1.34752	-1.12423	0.843683	0.496487	0.01898	-0.148794	-2.85025	-1.56833	0.135294	-1.71061	-1.68602	-3.04627	-1.838	-0.729042	-2.14974	NaN	NaN	NaN	1.49302
PSMA3	Proteasome subunit alpha type-3;Proteasome subunit alpha type		4	21.8	25.057	67223000	NaN	NaN	NaN	NaN	-0.405262	-1.42134	NaN	NaN	NaN	NaN	-3.17528	NaN	NaN	NaN	NaN	NaN	NaN	NaN	-2.04753	NaN	NaN	NaN	NaN	NaN	-2.32723	-2.64011	-1.65244	NaN	NaN	NaN	NaN	NaN	-1.39557	NaN	NaN	NaN	NaN	NaN	NaN	NaN	NaN	NaN	0.512602
PSMA4	Proteasome subunit alpha type-4;Proteasome subunit alpha type;Proteasome subunit beta type;Proteasome subunit alpha type;Proteasome subunit alpha type;Proteasome subunit alpha type;Proteasome subunit beta type;Proteasome subunit alpha type;Proteasome subunit alpha type		4	31.2	30.21	332060000	NaN	-1.53236	-1.19413	0.102793	-0.203901	0.310724	-0.702694	-0.262423	0.715454	NaN	NaN	NaN	NaN	NaN	NaN	-2.23943	NaN	NaN	-0.876535	-0.360674	-0.642262	-1.39769	-2.18876	-1.70891	-2.2794	-1.04221	-0.656261	-0.223877	-0.337881	-0.324114	NaN	NaN	-0.772051	NaN	NaN	NaN	NaN	0.266115	NaN	-1.02779	NaN	NaN	0.936581
MSN	Moesin		14	34.1	161.66	1778700000	1.5478	0.983465	1.46291	2.54977	3.90509	2.32	2.46227	2.58297	4.23407	1.13352	-0.0234146	0.356335	-1.65808	-0.869558	NaN	NaN	NaN	NaN	3.09812	0.845572	1.09766	0.183882	-0.284039	-1.51964	-0.451494	1.23029	2.29833	1.16903	1.71412	1.43773	0.745333	0.851305	2.10015	1.31124	-1.94176	-1.43256	0.484018	-0.659262	-0.812044	2.2453	NaN	-0.31377	2.4538
DDX6	Probable ATP-dependent RNA helicase DDX6		5	14.3	42.468	287870000	NaN	-1.20479	-0.000896454	-0.398689	0.00577354	0.925959	-0.726204	-0.489662	-0.630478	NaN	NaN	NaN	NaN	NaN	NaN	NaN	NaN	NaN	-0.300884	-1.00282	-0.390068	NaN	-1.67193	-0.680405	NaN	-1.33514	0.483898	0.279963	-0.680759	-0.0716705	NaN	NaN	-0.45075	NaN	-0.95009	NaN	NaN	NaN	NaN	NaN	NaN	NaN	-0.645332
U2AF2	Splicing factor U2AF 65 kDa subunit		9	43.7	190.31	9782300000	3.60521	4.24431	4.21275	3.25776	3.09165	4.03508	4.23833	4.38506	3.80411	4.80725	5.48686	6.14214	2.78513	4.3934	2.98074	5.04491	4.70945	5.22432	2.84588	4.7915	4.346	4.74645	5.30931	5.27084	4.43378	4.36118	5.19287	3.7594	4.2686	4.01335	4.81346	4.45469	4.04876	5.01019	4.60196	3.90979	5.31698	5.58293	5.36686	4.61162	4.96647	4.31279	2.75146
RPL13	60S ribosomal protein L13;60S ribosomal protein L13;60S ribosomal protein L13;60S ribosomal protein L13		7	30.8	83.988	965560000	0.784723	0.130713	0.996408	1.4122	1.34005	1.3187	1.18719	1.33352	1.11691	0.291172	-0.767929	-0.593731	NaN	-0.627483	NaN	-1.3626	-0.92885	NaN	1.61131	0.768763	1.58207	1.47518	0.638983	-0.404852	NaN	1.14284	1.92134	0.79929	0.851555	2.22602	NaN	NaN	0.607174	1.31898	0.968912	-1.01944	0.989838	0.3862	0.647957	-0.120527	-0.897797	NaN	0.619934
HMGB2	High mobility group protein B2		4	29.2	23.204	184110000	NaN	-0.449286	-1.22409	NaN	-1.86748	-1.5883	NaN	NaN	-0.605742	NaN	0.380739	-0.805296	NaN	0.0470047	-1.15135	NaN	-0.181988	0.0815048	NaN	NaN	-2.03906	-1.40864	1.01377	-1.02849	NaN	NaN	-1.28034	NaN	1.05619	-0.555285	NaN	NaN	-2.08364	-0.83634	-0.288551	NaN	NaN	-1.77233	-0.225941	-1.23639	-1.15821	NaN	NaN
PTBP1	Polypyrimidine tract-binding protein 1		14	42.7	162.63	2196700000	0.30945	1.14813	2.83051	2.64374	3.59077	3.03147	1.27013	2.18892	2.83083	-0.830839	1.12203	0.562654	NaN	-0.211393	-2.23381	0.56847	-0.410748	-2.39806	1.6236	1.3534	0.789955	-0.898396	0.0656223	0.265863	-0.0450191	1.52894	1.05977	2.24599	2.54593	2.25014	-0.536299	0.232389	1.60424	0.263966	1.49466	-1.07238	0.434837	0.71743	-2.37016	-0.489347	0.74617	-2.66135	3.62745
TARS	Threonine--tRNA ligase, cytoplasmic		11	23.4	120.68	507340000	-1.45829	-0.507296	-1.99948	0.100014	2.13283	1.10163	0.0528889	-0.49962	1.10194	-1.54702	-2.22734	-1.62062	NaN	NaN	NaN	NaN	NaN	NaN	-0.662437	-1.31723	-0.348948	NaN	NaN	NaN	NaN	-0.509775	0.233866	0.521318	-0.423775	0.322874	NaN	-0.413317	0.178858	NaN	NaN	NaN	-1.18873	-0.740993	NaN	NaN	NaN	-2.06229	0.356071
VARS	Valine--tRNA ligase		3	3.7	34.182	140620000	-1.06177	NaN	-2.28601	-1.46234	-1.4226	-1.29072	-2.27173	-1.81235	-1.70597	NaN	-2.1819	NaN	NaN	NaN	NaN	-2.76778	NaN	NaN	-1.22047	-2.51278	-2.49653	-1.40246	-2.2453	NaN	-3.04963	-1.42065	-1.49571	-1.78411	-2.26857	-1.18883	NaN	NaN	-0.984871	NaN	NaN	NaN	-2.34166	-2.73798	NaN	-1.56246	NaN	NaN	-2.28595
EEF1G	Elongation factor 1-gamma		13	35.2	186.16	3323600000	2.29715	2.43624	3.17961	2.63307	4.18744	4.1029	3.02915	3.01183	3.84764	0.517326	-0.840939	0.164053	-2.25475	-1.64512	NaN	-0.639887	-2.04824	-2.75811	2.88007	1.89234	1.91459	1.08759	0.684265	0.151703	-0.445017	1.14657	2.60726	3.44818	3.12706	2.6912	-1.63282	-0.196495	2.52735	1.08852	-0.553974	-2.4564	0.528376	-0.378876	-0.9673	1.27637	-0.859621	-0.910404	4.35149
RPL10	60S ribosomal protein L10		4	31.8	58.398	485470000	-0.211836	-1.03313	0.195307	0.444227	0.795927	-0.856546	-0.696434	-0.263023	-0.243515	-0.907635	-1.68866	NaN	NaN	NaN	NaN	-1.4847	NaN	NaN	0.106344	-0.92939	0.053442	-1.28997	-0.574575	-1.36185	-0.787764	-0.383457	1.62646	0.0490112	-0.117838	-0.00589371	NaN	-1.07095	-0.209728	0.0733376	-0.185455	-1.36197	NaN	NaN	-0.920874	NaN	-1.1473	-0.764183	1.64192
RPA1	Replication protein A 70 kDa DNA-binding subunit;Replication protein A 70 kDa DNA-binding subunit, N-terminally processed		8	22.1	113.83	521520000	0.398094	-0.40901	0.141472	0.882441	2.08978	1.53908	0	0.390762	1.77102	NaN	-0.690554	NaN	NaN	NaN	NaN	NaN	NaN	NaN	0.166861	-2.19237	-0.325018	0.0962276	NaN	-0.577316	NaN	-0.464617	0.790897	-0.103619	0.103287	0.605015	-1.54548	0.149847	-0.422407	NaN	NaN	NaN	NaN	-0.625023	NaN	NaN	NaN	NaN	0.00971031
APEX1	DNA-(apurinic or apyrimidinic site) lyase;DNA-(apurinic or apyrimidinic site) lyase, mitochondrial		9	41.2	84.992	549260000	NaN	NaN	-1.59078	0.225788	1.50257	0.528051	0.157816	-0.293415	-0.0481033	-0.639381	-2.45138	NaN	NaN	NaN	NaN	NaN	-0.904877	NaN	-0.367857	-1.28518	-0.871218	-1.42938	-1.35386	-1.64594	NaN	-1.13253	-0.379112	0.210363	0.941998	0.304386	NaN	NaN	-1.31604	-0.861546	-2.74806	NaN	-0.80991	-1.84508	NaN	NaN	NaN	-1.99141	1.44714
CAD	CAD protein;Glutamine-dependent carbamoyl-phosphate synthase;Aspartate carbamoyltransferase;Dihydroorotase		4	2.6	31.402	202080000	-2.18677	NaN	-0.851532	0.197104	-1.02627	-0.969614	-0.685835	-0.417194	-0.694738	-0.0701466	-0.649225	-0.774063	NaN	NaN	NaN	-0.520384	-1.1041	-1.03208	-0.662218	-2.14677	-1.12355	-1.66233	-1.10891	-0.972586	-0.63965	-2.28098	-1.13574	-1.00814	-1.87754	-1.00794	NaN	NaN	-1.55025	-1.5412	-0.253719	-0.945164	NaN	NaN	NaN	-1.51399	-0.809221	-1.05426	-1.44037
CALR	Calreticulin		3	10.8	21.242	164530000	-1.22881	-1.74159	-1.87665	-0.163597	-0.690512	-0.562105	-0.792608	-1.30167	-1.19889	-0.959047	-1.77077	NaN	NaN	NaN	NaN	NaN	NaN	NaN	0.000509262	-2.04832	-2.38541	-1.42414	-1.27717	-1.37676	-1.62799	NaN	NaN	NaN	-1.02939	NaN	NaN	NaN	-0.748808	NaN	NaN	NaN	NaN	NaN	NaN	NaN	NaN	NaN	0.212328
CANX	Calnexin		1	3.1	6.6003	10824000	NaN	NaN	NaN	NaN	-2.33835	NaN	NaN	NaN	NaN	NaN	NaN	NaN	NaN	NaN	NaN	NaN	NaN	NaN	NaN	NaN	NaN	NaN	NaN	NaN	NaN	NaN	-3.10213	NaN	NaN	NaN	NaN	NaN	NaN	NaN	NaN	NaN	NaN	NaN	NaN	NaN	NaN	NaN	-3.08703
PSMB4	Proteasome subunit beta type-4		2	14	41.269	65582000	NaN	NaN	NaN	NaN	-0.257082	-0.230782	NaN	NaN	NaN	NaN	NaN	NaN	NaN	NaN	NaN	NaN	NaN	NaN	NaN	NaN	NaN	NaN	NaN	NaN	NaN	-1.40541	NaN	NaN	NaN	NaN	NaN	NaN	NaN	NaN	NaN	NaN	NaN	NaN	NaN	NaN	NaN	NaN	NaN
PSMB6	Proteasome subunit beta type-6;Proteasome subunit beta type;Proteasome subunit beta type		2	8.8	12.206	79934000	NaN	-2.90586	NaN	-1.6767	-0.761187	-2.07187	-2.10467	-2.76155	-2.32792	-2.68103	-3.66829	NaN	NaN	-4.04912	NaN	NaN	NaN	NaN	-1.54993	NaN	-3.04433	NaN	NaN	NaN	-2.98807	-2.46032	-3.42572	-2.16989	-3.47791	NaN	NaN	NaN	-1.77195	NaN	-3.00894	NaN	-2.67269	NaN	NaN	NaN	NaN	-2.69688	0.0448799
PSMB5	Proteasome subunit beta type-5		10	46.8	110.33	840950000	-0.183666	-0.447691	1.00998	1.5919	2.83537	2.59851	1.26133	1.05999	2.23309	-0.44602	NaN	NaN	NaN	-2.79416	NaN	-1.63628	NaN	-2.0126	0.656282	-1.68788	-0.319202	-0.733051	-2.25061	-1.42932	NaN	-0.410818	0.884487	-0.313057	0.932608	1.7041	NaN	-0.267998	0.163054	0.0401192	NaN	-0.997536	-1.74731	-1.02101	-1.82391	-1.04004	-1.06256	NaN	0.340038
GRN	Granulins;Acrogranin;Paragranulin;Granulin-1;Granulin-2;Granulin-3;Granulin-4;Granulin-5;Granulin-6;Granulin-7		2	7.5	11.1	142410000	-0.547506	NaN	NaN	-1.43592	-1.57663	-1.86938	-1.05919	-2.38227	-2.62327	-0.842382	-1.08408	-0.811625	-1.87057	NaN	NaN	-0.574558	-1.05479	-1.39821	-2.74845	-1.93198	-2.90084	-0.237131	-1.37319	-0.668381	-0.520874	-1.47992	-1.08963	-1.07972	-0.882364	-0.794113	-1.15004	-1.92055	-2.21742	-0.612011	-0.857834	0.119963	-1.38324	-2.10448	NaN	-0.385855	-0.875029	-0.158913	-2.26667
TKT	Transketolase		14	32.3	141.29	1753300000	1.65364	0.635056	2.14226	1.60889	3.40558	3.11693	1.64248	2.47865	3.82517	-0.572681	-1.73981	-0.0132046	-2.58456	-1.72974	-1.15683	-1.53455	NaN	-2.15514	3.07268	0.312952	2.04273	1.22764	-0.121323	0.125006	-0.280424	0.940702	1.82011	2.40566	1.53367	2.09423	-2.58574	0.107611	1.9256	0.658232	-0.019619	-0.855705	-2.16825	-0.356871	-1.79299	0.741936	-1.8502	1.06433	2.26849
PRDX6	Peroxiredoxin-6		9	61.2	144.37	1705500000	-0.164612	-0.750509	-2.62646	3.7224	2.30679	1.917	2.17016	2.07672	3.39231	-0.624584	-1.43488	NaN	NaN	NaN	NaN	NaN	-2.75064	NaN	1.77295	-1.93384	1.77495	-0.596333	-3.39562	-0.999359	-2.29039	-0.275045	-0.325499	2.51801	1.02591	1.48112	-1.21227	-0.906919	1.71822	-1.1119	-2.53681	-3.43173	-0.286724	-1.37409	-1.51457	-1.02481	-1.29649	-3.20841	4.95825
C21orf33	ES1 protein homolog, mitochondrial		4	31.6	32.907	239630000	NaN	NaN	NaN	-0.42457	0.396505	-0.119719	NaN	NaN	NaN	NaN	NaN	NaN	NaN	NaN	NaN	NaN	NaN	NaN	NaN	NaN	NaN	NaN	NaN	NaN	NaN	-1.98084	0.0949955	0.161018	0.0346336	-0.0158615	NaN	NaN	NaN	-1.201	-0.0759602	NaN	NaN	NaN	NaN	NaN	NaN	NaN	1.39533
PRDX3	Thioredoxin-dependent peroxide reductase, mitochondrial		9	49.2	101.76	1805100000	0.67071	0.777349	2.19848	2.37144	1.52174	1.89327	2.54494	2.54113	3.08751	1.04026	-0.470573	0.406424	-0.476137	-0.385111	-0.735365	1.35714	0.200123	0.195745	1.50163	2.1309	1.15931	0.626707	0.0894222	1.1082	0.486658	0.645853	1.47345	2.11192	1.89235	1.40465	-1.67151	1.10979	2.04917	0.0987873	0.704048	-0.180298	2.01405	-1.03117	0.197933	-0.201193	0.629984	1.30606	2.93738
RPL12	60S ribosomal protein L12		8	64.2	144.39	3211100000	0.790342	2.24835	3.39599	3.66674	3.62359	3.64076	3.33314	2.53596	4.21108	0.977797	-0.707108	1.22905	NaN	-0.106627	-0.916466	0.657572	-0.312012	-1.2585	3.67122	3.28024	2.68949	0.0137844	1.01939	1.49103	-0.146971	2.32298	2.66132	3.02658	3.58383	2.51393	-1.68801	0.610956	1.81889	0.40509	1.67246	-1.76105	0.237959	-1.41645	-0.657072	-1.04954	0.962133	-1.02846	3.44399
PDIA3	Protein disulfide-isomerase A3		4	9.7	22.732	154270000	-1.39081	-1.8448	-1.62643	-2.14919	-2.29998	-2.35186	-1.54358	-1.91771	-2.42936	-1.3179	NaN	-1.92628	-2.35528	-2.34942	NaN	-2.46453	NaN	NaN	-1.17602	-2.52047	-2.62912	-1.7705	-1.25628	-1.68316	-0.460127	-1.43889	-1.86859	-1.9359	-1.21501	-1.17611	-1.81234	-1.53993	-2.19345	-1.46754	-0.500895	-0.769566	0.551916	-1.87338	NaN	-1.12171	-0.582441	-1.20141	-1.22573
NKTR	NK-tumor recognition protein;Putative peptidyl-prolyl cis-trans isomerase;Peptidyl-prolyl cis-trans isomerase;Peptidyl-prolyl cis-trans isomerase		4	4.5	46.333	125710000	NaN	NaN	NaN	NaN	NaN	NaN	NaN	NaN	NaN	NaN	-1.36971	NaN	NaN	NaN	NaN	NaN	-2.1387	NaN	1.72969	-1.68663	0.162912	NaN	NaN	NaN	NaN	NaN	NaN	NaN	NaN	NaN	NaN	NaN	NaN	NaN	NaN	NaN	NaN	NaN	NaN	NaN	NaN	NaN	NaN
NMT1	Glycylpeptide N-tetradecanoyltransferase 1;Glycylpeptide N-tetradecanoyltransferase;Glycylpeptide N-tetradecanoyltransferase		4	9.7	25.86	181710000	NaN	NaN	NaN	-0.0379982	-0.356945	-0.555161	NaN	-0.00794029	-0.0577126	NaN	NaN	NaN	NaN	NaN	NaN	NaN	NaN	NaN	-0.368572	-0.440102	-0.6402	NaN	NaN	NaN	NaN	NaN	NaN	NaN	NaN	NaN	NaN	NaN	NaN	NaN	-1.12028	NaN	NaN	NaN	NaN	NaN	NaN	NaN	NaN
ADSS	Adenylosuccinate synthetase isozyme 2;Adenylosuccinate synthetase isozyme 2;Adenylosuccinate synthetase isozyme 2		2	7	16.076	113070000	NaN	NaN	NaN	NaN	-1.19172	-1.26652	NaN	-1.30291	-0.933905	NaN	NaN	NaN	NaN	NaN	NaN	NaN	NaN	NaN	NaN	NaN	-1.8808	NaN	NaN	NaN	NaN	-3.1041	-1.80443	-0.0691509	-0.346703	-1.0799	NaN	NaN	-1.33426	NaN	-3.07614	NaN	NaN	NaN	NaN	NaN	NaN	NaN	0.103186
SDHA	Succinate dehydrogenase [ubiquinone] flavoprotein subunit, mitochondrial		6	18.2	45.232	226900000	-0.331869	-1.19523	-1.47424	NaN	-0.357328	-0.872932	-1.63443	-0.435923	-0.330519	NaN	NaN	NaN	NaN	NaN	NaN	NaN	NaN	NaN	-1.09962	-1.31057	-1.4517	NaN	NaN	NaN	NaN	NaN	NaN	NaN	NaN	-1.41291	NaN	NaN	-0.579435	NaN	NaN	NaN	-1.14261	-2.47227	NaN	NaN	NaN	NaN	NaN
MAT2A	S-adenosylmethionine synthase isoform type-2;S-adenosylmethionine synthase		5	17.2	32.709	381220000	-1.14234	-1.52508	-1.11421	0.57946	-0.332062	0.7703	0.0124493	0.350445	1.63997	-1.14784	NaN	-0.965714	NaN	NaN	NaN	NaN	NaN	NaN	1.09611	-0.708139	-0.325125	-1.2229	NaN	NaN	-1.48904	NaN	-0.137413	0.349134	-1.03636	-0.298199	NaN	NaN	-0.0473232	-0.686352	-1.26929	NaN	NaN	NaN	NaN	NaN	NaN	NaN	0.633219
DNAJA1	DnaJ homolog subfamily A member 1		4	12.6	25.875	193010000	0.355284	NaN	NaN	0.0549068	NaN	NaN	-0.190065	-1.3013	-1.34012	NaN	NaN	NaN	NaN	NaN	NaN	NaN	-1.08404	-0.768364	-0.0980377	-0.153299	-1.01972	NaN	NaN	NaN	NaN	NaN	-0.425165	-0.540462	NaN	NaN	NaN	NaN	-0.614412	NaN	-0.335247	-0.226105	NaN	0.126421	NaN	-0.839878	NaN	NaN	0.000358582
UQCRC1	Cytochrome b-c1 complex subunit 1, mitochondrial		2	6	17.094	98771000	-0.521992	NaN	-1.60229	-1.79624	-1.42944	-1.09195	NaN	NaN	-0.685131	NaN	NaN	NaN	NaN	NaN	NaN	NaN	NaN	NaN	-1.43784	-1.84646	NaN	NaN	NaN	NaN	NaN	NaN	NaN	NaN	NaN	-1.47304	NaN	NaN	NaN	NaN	NaN	NaN	-1.35995	NaN	NaN	NaN	NaN	NaN	-1.05343
ATIC	Bifunctional purine biosynthesis protein PURH;Phosphoribosylaminoimidazolecarboxamide formyltransferase;IMP cyclohydrolase		7	18.3	52.115	281870000	-0.563461	-0.926325	-1.15071	-0.764404	0.599977	0.130339	-1.01914	-0.755445	-0.13076	NaN	-1.76313	0.479242	NaN	NaN	NaN	NaN	NaN	NaN	-0.592518	NaN	-1.65155	-2.24657	NaN	-1.81857	-0.966087	-1.55068	-0.687241	-0.261749	-0.687368	-1.24505	NaN	NaN	-0.375677	-1.3905	-1.01242	NaN	NaN	NaN	NaN	NaN	NaN	NaN	-0.0489712
HNRNPH1	Heterogeneous nuclear ribonucleoprotein H;Heterogeneous nuclear ribonucleoprotein H, N-terminally processed		8	32.4	149.8	1580900000	1.2373	1.44155	1.88396	1.5601	2.26528	1.45399	1.35787	1.4852	1.03317	1.37624	1.38201	0.930923	-1.73413	-1.43602	NaN	0.976631	0.9702	0.332695	1.42353	1.28782	0.55891	1.17998	1.45321	1.09698	1.48863	1.29298	2.58264	2.01693	1.88632	1.54826	0.537329	-0.521484	1.86593	1.59036	2.10018	1.08171	1.84856	0.309572	NaN	1.63245	1.46349	1.12578	1.70665
PRDX2	Peroxiredoxin-2		7	33.8	67.408	1189200000	0.475616	-1.86756	-0.0435562	2.64441	2.02079	2.13444	1.92097	0.490923	2.34811	-0.081459	-0.927458	-0.965216	-1.064	-1.24808	NaN	-0.775541	NaN	-0.998135	1.25543	1.55277	-0.402987	0.793392	-0.961565	-0.760597	-0.544989	-0.282263	0.873404	2.2016	2.18238	1.49517	-1.28493	NaN	0.332098	-0.452532	-0.562626	-0.32576	0.308283	0.159477	-1.07594	-0.871599	NaN	-0.449852	2.98434
RPL9	60S ribosomal protein L9		10	48.9	148.11	1315900000	1.53838	0.884857	3.28375	1.30381	3.11389	2.07368	0.823954	0.600103	1.67739	-0.545683	-0.833414	-0.946753	NaN	NaN	NaN	0.150032	NaN	-1.39767	2.13332	0.988565	1.80676	-0.355801	-0.0104847	-0.760777	NaN	0.649416	1.40412	0.735792	1.38478	1.71435	-0.282154	0.109823	0.815973	-0.506838	-0.535763	NaN	-0.581961	-0.538536	-1.33744	NaN	NaN	NaN	0.243893
MCM4	DNA replication licensing factor MCM4		3	5.4	20.92	117180000	-1.95376	-2.42618	-1.72872	-1.82716	-0.744131	-1.14	-1.44042	-1.39271	-0.596136	NaN	-2.11419	NaN	NaN	NaN	NaN	NaN	NaN	NaN	-2.0032	NaN	-2.17101	NaN	NaN	NaN	NaN	-2.13311	NaN	-1.25367	-1.61124	NaN	NaN	NaN	-2.04356	NaN	-2.20147	NaN	NaN	NaN	NaN	NaN	NaN	-3.32831	-1.34428
MC			4	8	24.949	120350000	NaN	NaN	-1.42609	-1.63931	-1.09566	-1.37032	-1.24624	-1.92548	-0.877592	NaN	NaN	NaN	NaN	NaN	NaN	NaN	NaN	NaN	-1.21177	-1.64334	-2.12866	NaN	NaN	NaN	-0.807405	NaN	-1.00256	NaN	-1.32854	-1.2953	NaN	NaN	-1.32221	-2.06771	NaN	NaN	NaN	NaN	NaN	NaN	NaN	NaN	NaN
MCM7	DNA replication licensing factor MCM7		12	23.5	105.58	598870000	0.740067	0.375929	1.43896	1.15995	2.19448	1.67887	0.037693	0.310747	1.19301	NaN	NaN	NaN	NaN	NaN	NaN	NaN	NaN	NaN	1.0302	-0.599274	-0.229725	NaN	-1.56243	NaN	NaN	NaN	-0.108265	0.967529	0.800386	0.013895	NaN	NaN	1.33804	NaN	NaN	NaN	NaN	NaN	NaN	-1.58024	NaN	NaN	1.04922
SHMT2	Serine hydroxymethyltransferase, mitochondrial;Serine hydroxymethyltransferase;Serine hydroxymethyltransferase;Serine hydroxymethyltransferase;Serine hydroxymethyltransferase;Serine hydroxymethyltransferase		2	9.4	12.227	101680000	-1.68823	-1.2916	-1.45627	NaN	-1.50825	-1.47379	NaN	-1.08607	-1.19445	NaN	NaN	NaN	NaN	NaN	NaN	NaN	NaN	NaN	-1.82293	-1.68538	NaN	NaN	NaN	NaN	NaN	NaN	-1.35657	-2.60829	-1.92006	-1.47721	NaN	NaN	NaN	-1.44312	NaN	NaN	NaN	NaN	NaN	NaN	NaN	NaN	-0.172749
HSPA4	Heat shock 70 kDa protein 4		12	24.3	94.766	430890000	-0.497261	NaN	0.220367	2.04592	0.883976	1.375	0.396936	1.03244	1.78136	-1.73104	NaN	NaN	NaN	NaN	NaN	NaN	NaN	NaN	0.363884	NaN	-0.29241	-1.11424	NaN	NaN	0.330542	-1.22461	-0.555201	-0.100212	-0.257542	-0.128342	NaN	NaN	1.1786	NaN	NaN	NaN	NaN	NaN	NaN	NaN	NaN	NaN	1.14592
PFN2	Profilin-2;Profilin;Profilin;Profilin;Profilin;Profilin;Profilin;Profilin		1	15.4	13.993	29089000	NaN	NaN	NaN	NaN	-2.60005	NaN	NaN	NaN	NaN	NaN	NaN	NaN	NaN	NaN	NaN	NaN	NaN	NaN	NaN	NaN	NaN	NaN	NaN	NaN	NaN	NaN	NaN	-2.57569	NaN	NaN	NaN	NaN	NaN	NaN	NaN	NaN	NaN	NaN	NaN	NaN	NaN	NaN	-1.60523
PHB	Prohibitin		7	35.3	54.444	270690000	NaN	NaN	NaN	-0.340378	1.23091	0.0993538	NaN	-1.1565	-1.84463	NaN	-2.09447	NaN	NaN	NaN	NaN	NaN	NaN	NaN	-1.50397	-2.13124	-1.76012	-1.88308	NaN	NaN	-1.22485	-0.514017	0.104343	-0.245874	-0.495859	-0.528872	NaN	NaN	NaN	-0.0613899	0.00974083	NaN	-1.32873	NaN	NaN	NaN	NaN	NaN	0.651583
SERPINB6	Serpin B6		2	6.6	11.021	26712000	NaN	NaN	NaN	NaN	-1.82301	-1.77619	NaN	NaN	NaN	NaN	NaN	NaN	NaN	NaN	NaN	NaN	NaN	NaN	NaN	NaN	NaN	NaN	NaN	NaN	NaN	NaN	NaN	NaN	NaN	NaN	NaN	NaN	NaN	NaN	NaN	NaN	NaN	NaN	NaN	NaN	NaN	NaN	-1.37401
RDX	Radixin		1	11.1	7.1029	101830000	NaN	-1.9221	-2.22733	-1.40221	-3.42132	-2.00342	NaN	-1.49213	-1.19542	-1.49132	-2.10772	-1.23964	NaN	-1.5651	-2.65566	-1.97596	-1.98362	NaN	-1.41399	NaN	-1.69773	NaN	-1.91305	-1.54135	-1.92485	NaN	-1.02766	NaN	-1.76477	-1.7304	-1.87415	-1.42631	NaN	-0.875809	-1.31185	-1.59135	-1.45558	-1.26869	-1.42789	-1.97203	-2.08938	-1.58581	-1.19758
RPL22	60S ribosomal protein L22		4	41.6	30.116	1596000000	0.984083	2.13576	2.17462	1.29393	2.44691	2.38049	1.93644	1.74742	2.47186	0.452326	1.90396	1.64815	NaN	0.830564	1.03362	-0.407688	0.343506	0.458206	1.60688	0.799845	1.36888	1.24668	1.97093	0.775763	NaN	1.23997	2.5475	0.950115	1.80317	1.86937	0.215302	0.875105	1.38094	1.56356	0.494663	NaN	0.34708	1.13641	0.683918	0.378712	-0.51717	-1.61486	0.547544
MYH9	Myosin-9		23	17.3	264.16	1639400000	1.0518	0.327322	0.847862	2.20161	3.06782	3.03253	1.52818	2.64911	2.1213	0.0121918	-0.219423	-1.81969	NaN	1.53994	-0.261293	NaN	-2.04993	-1.21115	2.84826	-1.80292	2.86935	0.294952	0.449551	-0.31411	-2.02506	0.240126	0.337864	1.7882	1.06867	1.3868	-2.23898	-0.376326	1.21544	2.18472	1.29591	-0.309809	-0.451744	-0.507229	-1.05172	0.312746	1.2923	-0.337395	0.45993
COPB2	Coatomer subunit beta'		2	2.2	13.329	236750000	0.289652	NaN	-0.835443	1.55743	0.789564	1.14203	0.829065	NaN	1.54539	NaN	NaN	NaN	NaN	NaN	NaN	NaN	NaN	NaN	NaN	-0.340292	NaN	-0.213102	NaN	NaN	NaN	1.31976	2.48107	-0.692219	NaN	NaN	NaN	NaN	NaN	NaN	NaN	NaN	NaN	NaN	NaN	NaN	NaN	NaN	0.473953
FUS	RNA-binding protein FUS		3	10.9	35.957	431230000	-0.481884	-0.842304	-2.2297	-0.468475	-0.394733	-1.34573	-0.59466	NaN	NaN	1.60823	1.31141	-0.689962	NaN	-1.03051	NaN	0.769098	-0.220404	-0.758312	-0.43878	-1.00273	NaN	1.4322	1.38107	-0.264618	0.238411	-0.41728	-1.20481	0.170332	0.467804	-0.7672	0.161905	-0.873243	NaN	-0.138285	1.36587	0.576796	-0.556131	NaN	NaN	1.13409	1.56891	1.13311	-1.73744
DEK	Protein DEK		5	14.4	36.343	822480000	0.343048	1.80677	1.36201	0.423512	-0.642235	-0.12858	1.27082	-0.157846	-0.145531	1.28437	1.65001	1.07111	0.623104	0.585257	-0.0975857	1.78028	0.138453	0.943136	0.229088	0.845644	0.892763	0.90906	1.55649	2.07473	1.91422	0.392925	1.09834	0.724339	0.680807	0.189013	2.10597	0.588827	0.504328	1.58708	0.603355	1.81659	1.19836	0.997889	-0.292145	1.2705	1.30971	1.47747	0.258883
PSMC2	26S protease regulatory subunit 7		5	12.9	34.564	874110000	1.90223	1.33323	1.76039	2.58533	1.98534	2.46989	1.6672	2.38437	2.2373	NaN	NaN	NaN	NaN	NaN	NaN	1.98711	NaN	NaN	2.32174	NaN	NaN	NaN	1.68913	NaN	NaN	1.91056	2.52019	2.6857	2.09139	2.51152	NaN	NaN	3.00456	2.2539	2.51291	NaN	1.53289	NaN	NaN	3.27135	1.5005	NaN	4.80349
ATP5C1	ATP synthase subunit gamma, mitochondrial		4	15.4	27.114	258250000	-0.658588	-0.537371	NaN	-0.031889	0.0721226	-0.382212	-0.289206	-0.223103	-0.247549	NaN	NaN	NaN	NaN	NaN	NaN	NaN	NaN	NaN	NaN	NaN	-0.997658	NaN	NaN	NaN	NaN	-0.144674	-0.0473747	0.285183	-0.155867	-0.138954	NaN	NaN	-0.444008	NaN	NaN	NaN	-0.400856	NaN	NaN	NaN	NaN	NaN	-0.0538597
RPL4	60S ribosomal protein L4		8	23.4	79.229	1333200000	1.33169	0.729469	0.942011	0.638744	1.13392	0.65027	1.47471	1.08824	0.538359	1.84821	1.91086	1.38205	1.70184	1.82093	0.725407	1.27464	1.48941	1.61663	1.56069	1.6216	1.57105	1.87928	1.77853	1.36091	1.31725	1.84227	1.35014	0.868828	0.980989	1.51808	0.304644	1.17109	0.875954	1.42624	1.88038	1.50846	1.8502	1.63604	2.37278	2.24318	1.3234	0.734339	0.251148
PPP1CC	Serine/threonine-protein phosphatase PP1-gamma catalytic subunit;Serine/threonine-protein phosphatase;Serine/threonine-protein phosphatase;Serine/threonine-protein phosphatase;Serine/threonine-protein phosphatase;Serine/threonine-protein phosphatase;Serine/threonine-protein phosphatase		1	15.6	6.3696	28077000	NaN	NaN	NaN	-2.08929	-2.59685	-2.44044	NaN	NaN	NaN	NaN	NaN	NaN	NaN	NaN	NaN	NaN	NaN	NaN	NaN	NaN	NaN	NaN	NaN	NaN	NaN	NaN	NaN	NaN	-2.66957	-2.83573	NaN	NaN	NaN	NaN	NaN	NaN	NaN	NaN	NaN	NaN	NaN	NaN	-2.36973
SRP14	Signal recognition particle 14 kDa protein		1	12.2	8.393	117360000	-2.30281	-2.22622	-1.57919	-1.68194	-2.10984	-1.95847	-1.19608	-1.98626	-1.01067	NaN	-1.50746	-2.07856	NaN	-2.35143	NaN	NaN	NaN	-3.23362	-1.90047	-1.8301	-2.18474	-1.89576	-1.37458	-0.97542	NaN	-3.32697	-2.60405	-1.88327	-0.922907	NaN	NaN	NaN	-1.58189	-0.625504	-1.71475	NaN	NaN	NaN	NaN	-2.08765	-1.79428	NaN	-1.74265
TAGLN2	Transgelin-2		4	24.1	25.961	208030000	-0.625235	-0.70866	-0.747583	-1.34502	-2.34214	NaN	0.248056	-1.38	-2.08771	-0.0900803	-1.84409	NaN	-0.719355	-0.757467	-1.29838	NaN	NaN	-0.960783	-0.659002	-1.04178	-1.74772	-0.677576	-0.847578	-0.643629	-1.24832	-0.917425	-1.42276	-0.883114	-1.44844	NaN	-1.02102	NaN	-1.20894	0	-0.204596	0.50345	0.574982	-0.527784	-1.19075	0.764521	-0.113317	-0.138615	-0.395903
TALDO1	Transaldolase;Transaldolase		2	6.8	12.539	50516000	-1.3869	NaN	-2.10139	NaN	NaN	NaN	NaN	-1.9663	-1.89352	NaN	NaN	NaN	NaN	NaN	NaN	NaN	NaN	NaN	-0.49971	NaN	-2.13614	NaN	NaN	NaN	NaN	NaN	NaN	NaN	NaN	NaN	NaN	NaN	-1.52757	NaN	NaN	NaN	-1.94118	NaN	NaN	NaN	NaN	NaN	NaN
RBMX	RNA-binding motif protein, X chromosome;RNA-binding motif protein, X chromosome, N-terminally processed		8	19	46.252	327060000	NaN	-1.28236	-1.51606	NaN	-1.22257	NaN	NaN	-1.78425	-1.60466	-1.41655	1.37857	-0.257298	-2.33005	-0.754417	NaN	NaN	-0.30452	-1.3138	-1.08542	0.991241	0.0130367	-1.07702	0.613361	NaN	-0.99192	-0.605331	-0.979853	NaN	0.0750694	-0.781775	-2.23827	-1.435	-2.10616	-1.06417	-0.264944	NaN	-1.20894	-0.472565	0.637022	NaN	0.0679512	NaN	-1.7757
HSPA9	Stress-70 protein, mitochondrial		8	16.2	50.131	431220000	-1.24633	-0.310837	0.604561	-0.397379	0.218126	-0.476881	-0.0206223	-0.230728	-0.410679	-0.122961	0.403589	-0.532377	-1.57521	NaN	NaN	NaN	NaN	-1.45091	-0.787416	-0.292414	-1.6684	-0.848528	-0.0932198	-0.920284	0.0863724	0.08564	-0.0878258	-0.299633	-0.0309486	0.11841	-0.129482	-0.210089	-0.765772	0.222075	0.244551	-0.36071	0.701136	-0.331049	-0.458645	0.203747	-0.153585	NaN	0.193752
EIF4A3	Eukaryotic initiation factor 4A-III;Eukaryotic initiation factor 4A-III, N-terminally processed		8	27.5	67.93	631940000	1.28291	-0.514088	-0.195066	0.157558	1.07425	1.05564	0.708214	1.08137	1.75794	NaN	NaN	0.309258	NaN	NaN	NaN	NaN	NaN	NaN	1.34083	0.859949	0.582184	-2.39436	-1.25465	NaN	-1.05453	1.09212	0.553839	0.908489	0.270555	0.501965	NaN	-1.18607	0.798491	NaN	NaN	NaN	-0.845879	-0.321234	NaN	NaN	NaN	-1.92427	0.66794
RPL3	60S ribosomal protein L3		16	36.5	282.26	2428300000	-0.0963745	0.0128536	1.28057	1.61765	4.5366	2.89822	-0.420343	0.754374	2.16316	-0.1443	-0.312887	-0.636211	NaN	-1.12472	NaN	-1.34076	-0.981007	-1.11875	2.7365	1.53487	2.49642	0.246555	1.23124	-0.297138	NaN	2.11211	2.96677	-0.16637	2.38946	1.95854	NaN	-0.738329	-0.16621	-0.625338	-0.484838	NaN	-0.809479	-1.14764	-1.19925	-1.57712	-1.50152	NaN	-1.47887
DDOST	Dolichyl-diphosphooligosaccharide--protein glycosyltransferase 48 kDa subunit;Dolichyl-diphosphooligosaccharide--protein glycosyltransferase 48 kDa subunit;Dolichyl-diphosphooligosaccharide--protein glycosyltransferase 48 kDa subunit;Dolichyl-diphosphooligosaccharide--protein glycosyltransferase 48 kDa subunit		7	26.7	122.75	854150000	-0.909622	0.555876	0.935703	0.735407	2.78626	2.0879	-0.200205	1.11086	1.13763	NaN	-0.247036	-0.821934	-0.66445	-0.579283	NaN	NaN	NaN	NaN	0.491339	1.29197	1.41087	NaN	-0.766369	-1.50698	NaN	-0.487534	0.711565	-0.364674	-0.0252514	0.763102	-0.0699177	-0.540054	1.19356	-1.14703	-1.58831	NaN	NaN	-0.175974	-0.632399	-0.57506	NaN	NaN	-1.48776
CCT6A	T-complex protein 1 subunit zeta		13	35.8	165.76	1586300000	0.798994	0.895298	2.36167	2.83744	2.8285	3.10394	0.939486	2.341	3.19448	-0.738007	-1.91245	-1.01208	NaN	-1.68972	NaN	-0.752535	NaN	NaN	2.3801	0.450329	1.92148	0.756855	0.0687866	-0.14802	0.742363	0.921743	1.16639	2.83591	1.55555	1.80632	-0.00546837	1.3073	3.12715	0.716072	0.773434	-0.451593	1.39005	0.486557	NaN	-1.35851	-1.26711	-2.3805	3.10015
RPL13	60S ribosomal protein L13;60S ribosomal protein L13;60S ribosomal protein L13;60S ribosomal protein L13		5	27.6	34.442	599240000	-1.14404	-0.336927	0.75745	1.16569	0.508957	0.754	-0.638432	1.17302	0.527775	-0.630173	-1.32975	-0.967604	NaN	-0.364124	NaN	-1.72702	-1.34133	NaN	0.682072	0.242207	0.464289	-0.877525	-0.243179	-1.04537	-2.30439	-0.147104	0.49724	-0.333883	0.542204	0.293842	NaN	NaN	-0.53978	-0.15794	-0.709143	NaN	NaN	1.24157	-0.474096	-1.87316	-1.92036	NaN	-1.09227
MDH1	Malate dehydrogenase, cytoplasmic;Malate dehydrogenase		9	48.6	77.039	1574400000	-0.918442	-1.11277	0.78824	2.24673	2.55846	2.04717	1.80484	1.8343	3.88138	-1.78962	NaN	-1.48923	NaN	NaN	NaN	NaN	NaN	NaN	2.00062	0.405138	1.12307	NaN	-1.17652	-2.55026	-0.69906	-0.104906	1.09601	2.99866	2.75832	2.72277	NaN	NaN	0.480202	-0.466555	-1.18623	-2.77206	-0.883856	-1.23309	NaN	-1.79577	-1.62328	-1.72228	4.19987
MDH2	Malate dehydrogenase, mitochondrial;Malate dehydrogenase;Malate dehydrogenase;Malate dehydrogenase;Malate dehydrogenase;Malate dehydrogenase		20	65.1	257.42	3910600000	0.714006	1.48192	3.10874	2.83488	3.38305	3.20627	2.94911	3.16542	4.25823	0.68177	0.189325	-0.511551	-0.997751	-1.31044	-3.05662	-2.00182	-1.3482	-2.17042	2.92015	2.64154	2.3292	0.358318	-0.286772	-0.183136	0.607914	2.49877	3.03667	4.16749	3.71663	3.2313	-0.890129	0.146334	2.8904	-0.0146122	0.470284	-0.484488	0.516872	-0.408817	-0.79388	-0.565742	0.182985	-0.740242	5.26332
HADHA	Trifunctional enzyme subunit alpha, mitochondrial;Long-chain enoyl-CoA hydratase;Long chain 3-hydroxyacyl-CoA dehydrogenase		6	11.4	51.598	260300000	-0.772087	-1.96803	-0.487032	-0.740702	0.688601	0.152943	-1.08747	-0.545923	0.0167294	NaN	-3.49296	NaN	NaN	NaN	NaN	NaN	NaN	NaN	-1.44286	-1.86578	-2.11436	NaN	-2.80257	NaN	-2.55552	-1.87177	-1.65414	-1.21642	-0.99984	-1.21782	NaN	NaN	-0.851088	NaN	-2.0027	NaN	NaN	NaN	NaN	NaN	NaN	NaN	0.476057
EIF2S3L	Putative eukaryotic translation initiation factor 2 subunit 3-like protein		11	34.3	145.73	1319300000	-0.476973	0.208494	0.866302	3.27423	2.46174	2.93731	1.69444	1.89486	2.80556	NaN	-2.25461	-0.0476665	NaN	NaN	NaN	NaN	NaN	NaN	1.68011	1.06637	1.45901	-0.658972	NaN	NaN	NaN	0.683811	2.39047	1.36848	1.87736	2.22144	NaN	0.728191	0.828913	-0.579468	NaN	NaN	NaN	-1.3303	NaN	NaN	NaN	NaN	1.05935
NAA10	N-alpha-acetyltransferase 10		3	17.7	20.402	210500000	NaN	-1.43361	-1.81302	-1.11057	0.422003	-0.45941	-1.27205	-0.720915	-0.540838	-2.53578	NaN	NaN	NaN	NaN	NaN	NaN	NaN	NaN	-1.31888	-2.73319	-1.5967	NaN	NaN	NaN	NaN	-1.03085	0.028038	-1.26605	-1.43547	-1.1965	NaN	-1.73966	-1.03336	NaN	NaN	NaN	NaN	NaN	NaN	NaN	NaN	NaN	1.00008
GARS	Glycine--tRNA ligase		4	9.9	36.6	162930000	-2.57748	NaN	-0.357336	-0.79966	-0.589582	-0.77183	NaN	-1.52621	0.106386	NaN	-2.40547	NaN	NaN	NaN	NaN	NaN	NaN	NaN	-0.435713	-3.02443	NaN	NaN	NaN	NaN	NaN	-1.89942	-2.5141	-2.38545	-1.80012	-1.51767	NaN	NaN	1.76399	NaN	NaN	NaN	-1.93901	NaN	NaN	NaN	NaN	NaN	-1.3588
IARS	Isoleucine--tRNA ligase, cytoplasmic		2	3.2	13.526	90036000	-2.26222	NaN	-1.25959	-1.39807	-0.852871	-0.762327	-2.08519	-1.36533	-1.18582	NaN	NaN	NaN	NaN	NaN	NaN	NaN	NaN	NaN	-1.55156	NaN	-2.40876	NaN	NaN	NaN	NaN	NaN	-2.82112	-2.44312	-2.68089	-2.74273	NaN	NaN	-1.7715	NaN	-2.97728	NaN	NaN	NaN	NaN	NaN	NaN	NaN	-2.98725
TMPO	Lamina-associated polypeptide 2, isoform alpha;Thymopoietin;Thymopentin;Lamina-associated polypeptide 2, isoforms beta/gamma;Thymopoietin;Thymopentin		1	4.8	7.1657	27075000	NaN	NaN	-2.01663	NaN	NaN	NaN	-2.30997	-2.58869	-3.07274	NaN	NaN	NaN	-3.60586	NaN	NaN	NaN	NaN	NaN	-1.87193	NaN	NaN	NaN	NaN	NaN	NaN	NaN	NaN	NaN	NaN	NaN	-1.66696	-2.55989	NaN	-2.27978	NaN	-2.1981	-0.359947	-2.42607	NaN	NaN	NaN	NaN	-3.35104
STAT1	Signal transducer and activator of transcription 1-alpha/beta;Signal transducer and activator of transcription		2	3.7	11.713	132570000	-0.863417	NaN	-0.743032	-0.266479	-0.747726	-0.712181	NaN	NaN	NaN	NaN	NaN	NaN	NaN	NaN	NaN	NaN	NaN	NaN	-0.465216	NaN	NaN	NaN	NaN	NaN	NaN	NaN	NaN	-0.356653	-0.992142	-1.80908	NaN	NaN	0.729057	NaN	NaN	NaN	NaN	NaN	NaN	NaN	NaN	NaN	0.122814
CASP3	Caspase-3;Caspase-3 subunit p17;Caspase-3 subunit p12		2	6.9	12.397	102780000	-1.1047	NaN	NaN	-1.25189	-0.85684	-0.717697	NaN	-1.65133	-0.907688	NaN	NaN	NaN	NaN	NaN	NaN	NaN	NaN	NaN	-1.66308	NaN	NaN	NaN	NaN	NaN	NaN	-2.24765	-1.04701	-1.17409	-2.1558	-0.838343	NaN	NaN	-1.6486	NaN	NaN	NaN	NaN	NaN	NaN	NaN	NaN	NaN	0.336956
RPS27L	40S ribosomal protein S27-like;40S ribosomal protein S27;40S ribosomal protein S27;40S ribosomal protein S27		3	40.5	27.241	1102200000	-0.901939	-0.680746	1.00159	1.59881	1.86154	1.77195	-0.723879	0.539288	-0.899906	-0.8174	-0.460625	-1.0964	NaN	-1.15422	NaN	-1.15385	NaN	NaN	1.80055	1.21812	1.11427	-0.227516	0.854177	-1.40068	-1.54824	-0.722696	2.34646	-0.775061	0.898058	1.7054	NaN	NaN	-0.74028	1.18197	-0.916012	NaN	-1.73331	NaN	NaN	NaN	-1.33359	-1.88059	-1.24748
ACAA2	3-ketoacyl-CoA thiolase, mitochondrial		11	50.3	104.86	583700000	-0.0112896	-0.672155	NaN	0.0534973	2.39912	0.293358	-0.0531178	0.945789	1.13735	NaN	-1.73856	NaN	NaN	NaN	NaN	NaN	NaN	NaN	NaN	-0.986458	-1.62091	-1.47548	-1.2634	NaN	NaN	NaN	-0.70776	-0.102959	0.166876	0.211927	NaN	NaN	0.616659	-0.871634	-1.97386	NaN	NaN	NaN	NaN	NaN	-1.94749	NaN	1.63027
PAFAH1B1	Platelet-activating factor acetylhydrolase IB subunit alpha		2	17.3	14.015	71385000	NaN	NaN	NaN	-1.55332	-1.1099	-1.77734	NaN	-1.33214	-0.197914	NaN	NaN	NaN	NaN	NaN	NaN	NaN	NaN	NaN	-2.00007	NaN	NaN	NaN	NaN	NaN	NaN	NaN	-1.96169	NaN	NaN	-1.81319	NaN	NaN	-1.64399	NaN	NaN	NaN	NaN	NaN	NaN	NaN	NaN	NaN	NaN
VDAC2	Voltage-dependent anion-selective channel protein 2		6	30.9	97.745	1578400000	0.146381	1.22114	1.59647	2.1534	3.0563	2.56666	-0.0618477	1.33366	0.653194	0.285879	0.671301	0.709318	NaN	NaN	0.394285	-0.609425	0.282593	-0.133711	1.3227	1.41429	1.73397	0.171259	0.299656	0.0734329	NaN	1.35797	2.41176	1.44048	2.19297	1.85707	NaN	0.249432	1.67544	0.928215	0.172754	-0.910374	-0.372437	-0.832685	-0.901777	-1.54698	-0.0960655	-1.99914	1.31307
CBX5	Chromobox protein homolog 5		8	39.3	71.546	2244700000	1.70663	2.89506	1.68445	0.515478	1.30487	2.29747	1.88235	0.872339	1.75234	2.6878	2.77224	3.41723	0.207226	1.41822	2.03823	2.2668	2.33048	3.17651	1.19464	1.03122	0.847738	2.03452	2.70707	4.168	2.7801	2.05984	3.05293	1.52075	2.04968	2.14731	2.54226	1.31357	2.15343	4.45545	2.87662	2.88206	1.53239	2.75131	2.70952	2.75872	2.71289	2.89853	1.1273
USP5	Ubiquitin carboxyl-terminal hydrolase 5		4	8	52.785	185560000	-1.45247	-2.03141	-1.82145	-1.01446	-0.317446	-0.745419	-0.451067	-0.840847	0.561024	NaN	NaN	NaN	NaN	NaN	NaN	NaN	NaN	NaN	-0.267275	-1.9133	NaN	NaN	NaN	NaN	NaN	NaN	-1.12663	-1.13387	NaN	-1.33537	NaN	NaN	-0.823799	NaN	NaN	NaN	NaN	NaN	NaN	NaN	NaN	NaN	-0.353552
RECQL	ATP-dependent DNA helicase Q1		2	3.5	13.569	51761000	NaN	NaN	-2.40664	-1.8961	-2.55689	-3.31936	-2.18232	-1.93008	-1.17287	NaN	NaN	NaN	NaN	NaN	NaN	NaN	NaN	NaN	-1.30453	-3.16749	-2.86486	NaN	NaN	NaN	NaN	-2.62894	NaN	NaN	NaN	-1.87489	NaN	-3.43536	NaN	NaN	NaN	NaN	-3.01694	-2.65445	NaN	NaN	NaN	NaN	NaN
NOP2	Probable 28S rRNA (cytosine(4447)-C(5))-methyltransferase		6	7	43.821	310910000	-0.234251	0.0758934	-1.44451	NaN	-0.337723	-1.42337	-1.26528	-1.31109	-1.55744	-0.118641	1.51659	-1.06529	NaN	0.321369	NaN	-1.56811	0.118872	-1.30185	-1.02537	-1.13539	-1.11115	-1.07331	0.683567	-0.55344	-1.71214	-0.29439	-0.939526	NaN	-0.926088	-1.27467	-0.329283	-0.112305	-1.67635	-0.707455	-0.0201912	NaN	-0.354717	0.221094	-1.40063	-1.41295	-0.138964	NaN	-2.26564
CRKL	Crk-like protein		2	8.9	14.967	110100000	NaN	NaN	NaN	-0.883537	-2.79763	NaN	NaN	NaN	NaN	-1.27884	NaN	-1.62403	-1.45748	NaN	NaN	-1.04107	-2.01974	-1.97053	NaN	NaN	NaN	-0.863516	-2.26932	NaN	1.09324	-2.31834	NaN	-0.934452	-2.10019	-2.35645	1.31831	NaN	NaN	-0.757011	-1.2072	0.608976	0.727455	NaN	NaN	-1.53444	-0.849297	-0.139973	NaN
RPL27A	60S ribosomal protein L27a		4	44.4	49.936	804620000	-1.07218	1.14737	1.45087	1.12656	1.08191	0.87627	-0.203741	0.837505	1.3004	-0.481432	1.03128	-0.494169	NaN	-0.824686	-1.0698	-1.44595	-0.960257	-1.78469	0.992096	0.944458	1.54005	-0.728628	0.661108	-1.02904	-1.62764	-0.00476646	1.91108	0.479471	1.06595	1.22764	NaN	NaN	0.275747	-0.389359	0.0971451	-2.41876	NaN	0.407785	NaN	-1.08744	-0.432453	-2.20175	0.0743523
RPL5	60S ribosomal protein L5		13	48.1	138.81	2138300000	0.144419	0.892607	1.71209	2.46127	3.83589	3.74506	0.544153	2.35948	3.10755	0.540506	-0.0250149	-0.217934	NaN	-2.41499	NaN	NaN	NaN	NaN	3.34103	1.82333	3.38855	0.403849	0.332945	0.18902	NaN	1.74705	1.7274	0.427454	2.83699	2.5491	NaN	-2.50451	0.178686	0.163952	-1.55439	NaN	-3.37681	-2.57547	NaN	-0.881739	-3.11913	NaN	-0.366714
RPL21	60S ribosomal protein L21		3	27.5	24.11	460160000	-2.12719	-1.52252	-0.478369	-1.01097	1.4293	1.13701	NaN	0.770212	0.375364	-2.02662	-0.9291	-1.51075	NaN	NaN	-2.4771	-2.4039	-2.11438	NaN	-1.57175	-0.461895	0.163218	-0.953455	-2.01317	-0.593832	NaN	-1.79037	1.397	-0.549355	-0.544218	-0.465717	NaN	-2.12083	-1.36415	-1.77335	-0.78138	NaN	NaN	-1.46339	-2.15646	NaN	NaN	NaN	-1.47373
RPL28	60S ribosomal protein L28		7	39.4	76.758	1422000000	-1.27454	-0.326458	1.03932	0.870789	2.57026	1.66243	-1.0542	1.87177	1.41907	-1.23129	-1.11804	-1.83636	NaN	-3.10749	NaN	NaN	-2.61475	-2.84962	1.2545	1.38687	1.21078	-1.01464	-0.321146	-2.72858	-2.11038	1.33259	3.52483	0.483799	2.15116	2.48083	NaN	NaN	-0.322754	-1.34349	-0.907192	-2.87967	-4.05773	-1.4786	NaN	NaN	-2.11338	NaN	-0.446224
RPS9	40S ribosomal protein S9		3	15.5	17.912	435710000	-0.400398	-0.148325	0.0947933	0.00974846	0.429909	-0.0451736	-0.14127	0.181866	-0.209671	-0.659191	-1.09944	-0.835131	NaN	-1.21005	-1.36656	-1.30757	NaN	-1.71778	0.0555096	-0.20192	0.175964	-0.394812	-0.709763	-0.67374	-0.822567	0.0405216	0.92346	0.0854721	-0.205135	-0.0194244	-1.26043	-0.718283	-0.0760117	-0.288591	-0.672308	-1.42492	-0.662502	-0.224962	-0.916492	-0.701469	NaN	NaN	-0.441133
RPS5	40S ribosomal protein S5;40S ribosomal protein S5, N-terminally processed		1	11.2	7.0225	18378000	NaN	NaN	NaN	NaN	-4.01703	NaN	NaN	NaN	NaN	NaN	NaN	NaN	NaN	NaN	NaN	NaN	NaN	NaN	NaN	NaN	NaN	NaN	NaN	NaN	NaN	-4.17255	-2.84059	NaN	NaN	-3.8096	NaN	NaN	NaN	-2.65728	-2.69552	-4.11905	NaN	NaN	NaN	-0.151604	-3.81108	NaN	NaN
CAPZA2	F-actin-capping protein subunit alpha-2		2	28.8	13.242	32998000	NaN	NaN	NaN	-1.03864	NaN	-1.37692	-1.65683	NaN	-0.996082	NaN	NaN	NaN	NaN	NaN	NaN	NaN	NaN	NaN	NaN	NaN	NaN	NaN	NaN	NaN	NaN	NaN	-1.57761	-1.62811	NaN	NaN	NaN	NaN	NaN	NaN	-1.68018	NaN	NaN	NaN	NaN	NaN	NaN	NaN	-1.2945
CAPZB	F-actin-capping protein subunit beta		9	42.6	71.739	944260000	0.110271	-0.585093	0.85428	0.193953	1.37627	1.53061	0.518522	1.54898	2.33262	-0.947908	-1.0067	-0.530098	NaN	-1.4664	NaN	NaN	-1.8037	NaN	0.209349	-0.125225	-0.472803	-0.411488	-1.19025	NaN	-0.883232	0.523653	2.80763	1.68966	1.67803	1.77728	NaN	-0.674191	0.614887	-0.582308	-0.750452	-0.952351	-0.92856	-1.16755	NaN	NaN	-1.85376	-1.60103	3.7122
QARS	Glutamine--tRNA ligase		2	4.3	28.942	58201000	NaN	NaN	NaN	NaN	-1.79557	NaN	NaN	-0.859734	-2.01483	NaN	NaN	NaN	NaN	NaN	NaN	NaN	NaN	NaN	-2.15464	NaN	-2.43139	NaN	NaN	NaN	NaN	NaN	NaN	NaN	NaN	NaN	NaN	NaN	NaN	NaN	NaN	NaN	NaN	NaN	NaN	NaN	NaN	NaN	NaN
RPL29	60S ribosomal protein L29		4	18.2	45.971	5310700000	3.81376	3.57867	2.08509	2.30207	3.08867	2.67588	3.11867	2.56877	2.19973	4.22517	4.59329	4.6287	3.94348	3.08357	3.24577	3.8048	3.18161	3.57762	2.56577	1.99183	1.73333	3.67753	4.49949	5.35862	3.92469	3.30147	4.19405	3.43404	3.6883	2.90715	3.10755	1.75123	2.92061	4.72708	3.85578	4.2811	4.10598	4.54274	3.1788	4.22437	4.24831	3.75936	2.18164
UQCRFS1P1	Putative cytochrome b-c1 complex subunit Rieske-like protein 1		3	19	19.142	173200000	NaN	NaN	NaN	-1.14647	-0.885851	-0.682039	-0.956837	-0.566931	-0.493227	NaN	NaN	NaN	NaN	NaN	NaN	NaN	NaN	NaN	NaN	NaN	NaN	NaN	NaN	NaN	NaN	NaN	-1.21063	-0.207701	-0.54533	-0.717817	NaN	NaN	-0.584297	NaN	-1.72162	NaN	NaN	NaN	NaN	NaN	NaN	NaN	1.31643
PREP	Prolyl endopeptidase		1	2.4	7.8164	22129000	NaN	NaN	NaN	-2.13203	-2.77145	-1.87103	NaN	NaN	-1.21822	NaN	NaN	NaN	NaN	NaN	NaN	NaN	NaN	NaN	NaN	NaN	NaN	NaN	NaN	NaN	NaN	NaN	-3.17311	NaN	NaN	-2.90828	NaN	NaN	NaN	NaN	NaN	NaN	NaN	NaN	NaN	NaN	NaN	NaN	-3.04554
ARCN1	Coatomer subunit delta		5	12.5	87.197	319450000	-1.71795	-2.10448	-2.12696	-0.253452	0.676794	1.08394	-0.512245	-0.119442	0.535915	NaN	-2.33067	NaN	NaN	NaN	NaN	NaN	NaN	NaN	-0.541021	-2.47189	-0.641264	NaN	-2.06945	-1.71055	NaN	-0.981222	-0.812704	-0.733683	0.460293	0.825537	NaN	-1.3696	-0.561152	-3.3874	-2.89607	NaN	-2.64025	NaN	NaN	-1.50126	NaN	NaN	0.618532
CCT5	T-complex protein 1 subunit epsilon		5	12.7	31.324	338770000	-0.553583	-1.40189	-1.30039	-0.744026	0.450346	-0.712803	-0.552788	0.339119	1.1773	-0.821796	-1.82789	NaN	-2.10764	NaN	NaN	-1.45209	NaN	NaN	-1.00993	-2.14784	-1.14189	-1.3558	-1.96042	-1.50325	-1.11237	-1.0492	-0.712646	-0.14023	0.106403	-0.281265	-2.02812	-1.01869	-0.255409	-0.647173	-0.394751	-1.97144	NaN	-1.75237	NaN	-1.74954	-1.28115	-1.83408	1.03763
ALDH9A1	4-trimethylaminobutyraldehyde dehydrogenase		6	16.4	35.718	153250000	NaN	NaN	-0.831974	-0.850246	0.265568	-0.454277	-2.04067	-2.03977	-1.34996	NaN	NaN	-1.94188	NaN	NaN	NaN	NaN	-2.38393	NaN	-2.38118	NaN	NaN	-1.31296	-2.33815	NaN	NaN	-2.26882	-0.682158	-0.900217	-0.676289	-1.83901	NaN	-2.08016	-0.818661	NaN	NaN	NaN	NaN	NaN	NaN	NaN	NaN	NaN	-0.930967
RPL34	60S ribosomal protein L34		6	34.2	39.173	1911500000	0.872047	-0.667917	2.10928	2.21576	2.99463	3.44626	2.1787	2.97073	2.39343	-0.0525723	-0.385992	-0.181635	NaN	-0.206509	-2.24602	NaN	-1.71044	NaN	1.47633	1.71498	1.43905	1.89843	2.04641	-0.184896	-1.1476	3.61276	4.49355	0.21368	3.02325	3.61631	-3.19597	-0.0409184	0.466127	0.411018	-0.0972519	-1.25081	-1.58242	-0.450048	-0.683949	-0.483019	-1.20531	-1.54356	1.8673
LMAN1	Protein ERGIC-53		2	3.9	11.04	145660000	NaN	-2.2227	-1.95005	-1.92389	-1.14058	-1.62721	NaN	-1.96151	-0.729502	NaN	NaN	NaN	NaN	NaN	NaN	NaN	NaN	NaN	-0.194469	-0.125696	0.709759	-3.16857	NaN	-3.8169	NaN	NaN	-1.90259	-2.16283	-2.53446	-1.4609	NaN	NaN	-1.65015	NaN	NaN	NaN	NaN	NaN	NaN	NaN	NaN	NaN	NaN
FASN	Fatty acid synthase;[Acyl-carrier-protein] S-acetyltransferase;[Acyl-carrier-protein] S-malonyltransferase;3-oxoacyl-[acyl-carrier-protein] synthase;3-oxoacyl-[acyl-carrier-protein] reductase;3-hydroxyacyl-[acyl-carrier-protein] dehydratase;Enoyl-[acyl-carrier-protein] reductase;Oleoyl-[acyl-carrier-protein] hydrolase		47	26.1	323.31	4951400000	1.96772	2.39702	3.63056	4.72686	5.09455	4.51169	3.72495	4.3688	4.83785	1.1081	-0.857851	-1.88654	NaN	0.0223846	-1.56416	0	-0.41563	-0.377399	4.97348	1.18237	3.86696	2.69152	1.15529	0.70483	-2.13071	2.05313	2.17391	3.24621	3.48613	2.11316	-0.033802	0.166395	3.18112	1.85962	2.03538	-1.36676	-0.849508	-1.00111	-2.03504	-0.260193	-0.308474	0.315628	1.67184
CCT3	T-complex protein 1 subunit gamma;T-complex protein 1 subunit gamma		5	10.8	30.149	289370000	-0.91489	-0.662876	-0.81448	0.308317	-0.334826	-0.370041	0.117468	0.562347	-0.106031	NaN	NaN	NaN	-1.68525	NaN	NaN	-1.28344	-1.2574	NaN	-0.703934	NaN	-0.10338	-1.99897	-1.52433	NaN	-1.26076	-1.02964	-0.64596	-0.0283127	-0.593641	-0.839424	NaN	NaN	0.30982	-1.17346	-0.462639	-1.40273	-0.180014	-0.894468	NaN	-0.892027	-0.924774	NaN	0.958778
TUFM	Elongation factor Tu, mitochondrial		19	58	278.34	4000200000	1.45013	2.33594	2.92999	3.09553	4.37435	4.12351	3.10916	3.65608	4.76843	0.492966	0.535635	0.73073	NaN	-0.754129	NaN	-0.481831	-2.57785	-1.05946	3.01814	2.08306	2.00698	0.633381	1.0131	-0.581947	0.389872	1.93614	3.32704	3.75751	3.50321	3.8336	-1.57274	0.5326	2.27991	0.183189	0.0019207	-0.73337	-3.48703	-3.84304	NaN	-0.522194	-0.377108	-0.215147	4.59999
PPM1F	Protein phosphatase 1F		3	11.4	16.87	157510000	NaN	NaN	NaN	NaN	NaN	-0.772385	NaN	NaN	-0.0921097	NaN	NaN	NaN	NaN	NaN	NaN	NaN	NaN	NaN	0.0211582	1.76045	NaN	NaN	NaN	NaN	NaN	NaN	NaN	NaN	NaN	NaN	NaN	NaN	NaN	NaN	NaN	NaN	NaN	NaN	NaN	NaN	NaN	NaN	-1.1854
PSMB3	Proteasome subunit beta type-3		4	51.4	62.743	201570000	NaN	NaN	-0.788853	0.380808	0.019762	0.228956	-1.33349	NaN	-1.80066	NaN	NaN	NaN	-0.725609	NaN	NaN	NaN	NaN	-0.571236	-0.965824	NaN	-1.04222	NaN	NaN	NaN	NaN	NaN	-2.09866	-0.39978	-1.49665	-1.09262	0.00328636	-0.191179	-1.75532	NaN	-2.18322	NaN	0.253763	0.331335	-0.763523	NaN	NaN	NaN	-0.720987
MCM2	DNA replication licensing factor MCM2		1	8.4	38.247	92910000	NaN	NaN	NaN	-1.61538	-1.38956	-1.52763	-0.656878	-0.915272	-1.37586	NaN	NaN	NaN	NaN	NaN	NaN	NaN	NaN	NaN	-1.48391	NaN	NaN	NaN	NaN	NaN	NaN	NaN	NaN	-1.18185	-1.72726	-1.40861	NaN	NaN	-1.05294	NaN	NaN	NaN	NaN	NaN	NaN	NaN	NaN	NaN	-1.66422
TMED10	Transmembrane emp24 domain-containing protein 10		2	11.9	14.258	61467000	-3.21582	NaN	NaN	-2.23601	-1.35535	-2.33883	NaN	-2.82584	-2.81044	NaN	NaN	NaN	NaN	NaN	NaN	NaN	NaN	NaN	-1.03851	NaN	NaN	NaN	-2.89592	NaN	NaN	NaN	-2.53164	-2.35055	NaN	-2.65633	NaN	NaN	-3.33016	NaN	NaN	NaN	NaN	NaN	NaN	NaN	NaN	NaN	-2.16358
RBM25	RNA-binding protein 25		2	2.7	12.779	55125000	NaN	NaN	NaN	NaN	-2.39837	NaN	NaN	NaN	NaN	NaN	NaN	NaN	NaN	NaN	NaN	NaN	NaN	NaN	-0.0723362	-1.62456	-0.817442	NaN	NaN	NaN	NaN	NaN	NaN	NaN	NaN	NaN	NaN	NaN	NaN	NaN	NaN	NaN	NaN	NaN	NaN	NaN	NaN	NaN	NaN
GDI2	Rab GDP dissociation inhibitor beta		7	37.1	127.96	1455900000	0.118963	0.117374	1.1156	2.32814	2.6765	2.25597	1.89949	0.877041	3.30558	0.559624	NaN	NaN	NaN	NaN	NaN	-1.1285	NaN	NaN	2.25677	-2.20765	1.14234	-0.780983	NaN	-0.607445	-0.693792	-0.0608959	0.999758	1.41742	1.96609	1.76182	NaN	-0.690584	0.696789	-0.722054	-0.581942	NaN	-0.639029	NaN	NaN	-1.02668	-1.71535	-2.04466	3.89758
SERPINH1	Serpin H1		10	36.8	172.52	1590000000	-0.236351	-0.103598	1.2999	2.21553	2.34351	2.17953	1.88644	1.74925	2.70623	NaN	-1.5813	NaN	0.445271	-0.0627556	-0.480759	NaN	NaN	NaN	1.35191	0.335932	0.778557	NaN	NaN	NaN	NaN	-0.00384903	-0.394659	2.80099	1.96986	1.62988	NaN	NaN	0.258423	NaN	-0.121565	NaN	NaN	NaN	NaN	NaN	NaN	NaN	4.08428
RPL14	60S ribosomal protein L14		4	36.3	30.118	1306400000	0.453304	2.37548	2.10488	0.774611	1.22919	1.08358	-0.140696	1.64275	1.46249	0.857239	2.47708	1.46167	NaN	2.02846	0.735582	0.113747	0.349707	0.57023	1.26908	1.75559	1.32175	0.0792999	1.50711	1.45652	-0.0442734	1.5314	1.78613	1.07331	1.76663	0.906971	NaN	-0.0171661	0.890017	1.02732	0.764217	NaN	0.18737	2.20609	0.779877	0.881836	0.11507	-0.516909	0.235292
CCT8	T-complex protein 1 subunit theta		15	35.3	129.49	1288700000	0.641529	0.602087	1.65594	2.4056	2.49521	2.15028	1.52683	2.26159	3.25593	-0.00973129	NaN	NaN	-2.7647	-1.81974	NaN	NaN	NaN	NaN	2.21256	0.654118	0.694414	-0.144323	-1.86252	-0.530415	-1.24416	0.302645	1.67329	2.12934	1.56703	1.47614	-2.14388	-0.595343	1.22534	-0.38418	-0.279816	-1.9959	0.762177	-0.00526047	NaN	-1.19605	-1.83998	-2.01298	3.18028
CCT4	T-complex protein 1 subunit delta		12	34	144.32	1017800000	1.15919	-3.50735	1.17635	1.38694	1.09151	1.44213	1.26389	2.21787	3.16063	-0.448851	-0.788551	-1.70874	-2.84648	NaN	NaN	-1.66241	NaN	NaN	1.79203	-0.0857162	1.20224	-0.734238	-0.305092	NaN	0.333696	-1.30487	0.766314	2.32783	0.964243	1.01073	NaN	-0.148926	0.355476	-0.637606	-1.08139	NaN	-1.347	NaN	NaN	-0.760202	NaN	-1.96601	3.158
RAB5C	Ras-related protein Rab-5C		6	45.4	96.492	876260000	0.75149	-0.938635	1.28038	1.16009	2.83138	1.86961	0.513166	1.33388	1.21787	-1.0757	NaN	-1.68547	NaN	NaN	NaN	NaN	NaN	NaN	1.0381	1.15654	0.336674	-1.18464	-1.11534	NaN	NaN	-0.157633	1.53472	0.699612	0.805279	0.989298	NaN	-0.098074	1.49794	-1.80579	NaN	NaN	NaN	-1.87197	NaN	NaN	NaN	NaN	0.530605
RAB7A	Ras-related protein Rab-7a		10	59.9	109.67	791260000	-1.93134	-0.935057	-0.41	-0.153322	0.77527	0.445875	-0.285772	0.100943	0.32275	NaN	NaN	-2.22294	NaN	NaN	NaN	NaN	NaN	NaN	0.684433	0.37956	0.491282	NaN	NaN	NaN	-1.00356	-0.225462	1.83009	1.51147	1.49624	1.45522	NaN	-1.92053	-0.803944	0.62355	-1.68689	NaN	-1.59036	NaN	NaN	NaN	NaN	NaN	2.52707
RAB27A	Ras-related protein Rab-27A		2	22.8	22.5	370020000	-0.17498	0.7479	-0.504004	2.41671	-1.61078	0.917805	NaN	-0.102608	-1.2088	0.550705	-0.0468616	1.51859	1.26524	-0.567822	2.50921	2.04762	2.11068	1.74005	NaN	NaN	-0.862736	1.28665	0.224352	1.82015	0.588554	0.740129	0.502956	0.669952	-0.138264	1.46298	0.916056	1.87442	0.442421	1.12819	0.598328	-0.169319	-0.438553	-0.619572	0.252653	1.50549	0.302626	1.93822	0.373869
SSR4	Translocon-associated protein subunit delta		4	30.6	26.117	201340000	-0.374458	-1.08018	-2.31447	0.591208	-0.750576	-0.810854	NaN	-0.586742	-0.436031	NaN	NaN	NaN	-1.21495	NaN	NaN	NaN	NaN	NaN	-1.27604	NaN	-0.520971	NaN	NaN	NaN	NaN	-0.264399	-0.280338	-2.14166	-0.903206	-0.618776	NaN	NaN	-0.522894	NaN	NaN	NaN	NaN	NaN	-2.95131	NaN	NaN	NaN	-2.97454
BCAP31	B-cell receptor-associated protein 31		5	19.9	38.949	311000000	-0.886335	NaN	-1.3076	1.44505	-0.70434	-0.395555	-0.329424	-0.61249	-0.370287	-0.946079	NaN	NaN	NaN	NaN	NaN	NaN	NaN	NaN	1.21877	-2.96058	-0.530863	-0.151388	-0.898029	-1.74002	NaN	-0.438396	-0.31402	-1.63068	-0.894493	-0.969973	NaN	NaN	-1.96931	NaN	NaN	NaN	-1.86142	NaN	NaN	NaN	NaN	NaN	-0.621153
HCFC1	Host cell factor 1;HCF N-terminal chain 1;HCF N-terminal chain 2;HCF N-terminal chain 3;HCF N-terminal chain 4;HCF N-terminal chain 5;HCF N-terminal chain 6;HCF C-terminal chain 1;HCF C-terminal chain 2;HCF C-terminal chain 3;HCF C-terminal chain 4;HCF C-terminal chain 5;HCF C-terminal chain 6		2	1.7	16.098	87102000	-1.6753	NaN	-2.21803	-1.95565	-1.03105	-1.82068	NaN	-2.53718	-1.88681	NaN	NaN	NaN	NaN	NaN	NaN	NaN	NaN	NaN	-1.95916	-3.07443	-2.96183	NaN	-2.56294	NaN	NaN	NaN	-1.53634	-2.72533	-1.9594	-2.29182	NaN	NaN	-2.22311	NaN	-2.76225	NaN	NaN	NaN	NaN	NaN	NaN	NaN	NaN
HSD17B4	Peroxisomal multifunctional enzyme type 2;(3R)-hydroxyacyl-CoA dehydrogenase;Enoyl-CoA hydratase 2		14	28.8	104.06	696040000	-0.71244	0.207159	-0.436655	0.769833	2.43589	1.96027	0.232397	1.27341	1.71104	-0.465704	-0.356525	-1.00859	NaN	NaN	NaN	NaN	NaN	NaN	-0.912025	NaN	-0.185139	-0.345545	-1.32413	-0.300819	NaN	0.41873	1.56106	0.0747662	0.398983	0.447701	NaN	NaN	0.107573	-0.794718	NaN	NaN	NaN	NaN	NaN	NaN	NaN	NaN	0.747307
PSMD7	26S proteasome non-ATPase regulatory subunit 7		1	13.6	8.7457	25898000	NaN	NaN	NaN	NaN	NaN	NaN	NaN	NaN	NaN	NaN	NaN	NaN	NaN	NaN	NaN	NaN	NaN	NaN	NaN	NaN	NaN	NaN	NaN	NaN	NaN	NaN	NaN	-0.376791	-1.88576	-2.29064	NaN	NaN	NaN	NaN	NaN	NaN	NaN	NaN	NaN	NaN	NaN	NaN	-1.88847
VAMP7	Vesicle-associated membrane protein 7		1	12.3	17.477	9869300	NaN	NaN	NaN	-2.69252	NaN	NaN	NaN	NaN	NaN	NaN	NaN	NaN	NaN	NaN	NaN	NaN	NaN	NaN	NaN	NaN	NaN	NaN	NaN	NaN	NaN	NaN	NaN	NaN	NaN	NaN	NaN	NaN	NaN	NaN	NaN	NaN	NaN	NaN	NaN	NaN	NaN	NaN	NaN
HNRNPA3	Heterogeneous nuclear ribonucleoprotein A3		11	41.5	188.88	2261200000	1.78629	2.14075	1.46684	0.883886	2.65734	1.51047	1.86687	1.88472	2.4372	1.88199	2.33155	2.37821	1.35715	1.07165	-0.197744	1.62403	1.12907	1.13093	1.92873	2.31008	1.11616	1.98476	1.76525	1.50674	1.04173	2.8638	0.735439	1.40954	1.56185	1.93458	2.21021	0.823399	2.31959	1.05849	1.83647	2.06835	1.95388	0.357414	1.26865	2.00965	1.5696	2.29568	2.63485
PGD	6-phosphogluconate dehydrogenase, decarboxylating		8	23	65.733	482690000	-1.39195	-1.11712	-1.11566	0.645681	0.421482	0.710407	-0.227699	0.292284	0.735321	-0.543434	NaN	-2.76556	NaN	NaN	NaN	NaN	NaN	NaN	-0.670435	-3.115	-0.927809	-1.002	-1.71544	NaN	-0.861975	-1.08186	0.769272	1.60285	0.398212	1.01275	NaN	NaN	-0.534363	-1.62624	-1.28614	NaN	NaN	NaN	NaN	NaN	NaN	NaN	3.40507
HNRNPM	Heterogeneous nuclear ribonucleoprotein M		4	8	23.917	163450000	NaN	-0.872707	-0.361147	-1.38108	-1.60278	NaN	NaN	-0.971857	-1.50646	NaN	NaN	NaN	NaN	NaN	NaN	-1.25831	-1.08122	NaN	-0.697922	-1.44963	-1.1037	NaN	NaN	-1.83638	NaN	-1.18245	-0.547903	-1.39156	-1.58554	NaN	NaN	NaN	-1.3033	-0.724203	-0.677811	NaN	-0.980408	-1.14565	NaN	-1.56928	-0.835421	-1.47323	-1.16767
KPNA2	Importin subunit alpha-1;Importin subunit alpha;Importin subunit alpha		2	5.1	19.926	78064000	NaN	-3.26572	-2.72267	NaN	-1.77189	-3.02671	-2.68282	-2.1353	-2.35917	NaN	-3.67553	NaN	NaN	NaN	NaN	NaN	NaN	NaN	-2.63943	-3.46379	-4.22184	NaN	-2.74625	NaN	NaN	NaN	-2.82851	-0.908171	-2.37763	-2.48262	NaN	-2.25923	-1.86959	-1.43439	-0.603321	-2.23309	-1.82278	-2.20979	-2.94503	-2.65695	-2.92931	NaN	-2.60821
POLR2H	DNA-directed RNA polymerases I, II, and III subunit RPABC3		1	18.6	6.6825	27973000	NaN	NaN	NaN	-1.54706	-1.85722	NaN	NaN	NaN	NaN	NaN	NaN	NaN	NaN	NaN	NaN	NaN	NaN	NaN	NaN	NaN	NaN	NaN	NaN	NaN	NaN	NaN	NaN	NaN	NaN	-1.8129	NaN	NaN	NaN	NaN	NaN	NaN	NaN	NaN	NaN	NaN	NaN	NaN	-1.79812
ARHGDIA	Rho GDP-dissociation inhibitor 1		6	46.4	103.43	1273500000	1.75347	0.261705	0.625731	3.3272	2.37481	2.37381	1.37006	1.5392	2.0168	0.821344	-1.16051	-0.802629	NaN	NaN	NaN	-1.19973	NaN	NaN	2.33582	-0.702011	1.44279	1.19369	0.0134354	0.464134	0.414433	-0.0964165	0.050724	2.08935	1.17356	1.19084	-0.625757	0.606894	2.40004	-0.173149	-0.625023	NaN	0.341114	-0.133949	NaN	-0.862671	NaN	-0.154566	3.19385
CAPZA1	F-actin-capping protein subunit alpha-1		2	14.7	28.25	209290000	NaN	NaN	NaN	-0.173059	-0.691639	-0.16367	-1.61166	-0.747681	-0.28426	NaN	NaN	NaN	NaN	NaN	NaN	NaN	NaN	NaN	-0.55862	-1.33097	-0.746572	-1.66583	NaN	NaN	NaN	NaN	-1.31085	-0.379854	-1.08606	-0.850979	NaN	NaN	-0.429964	NaN	NaN	NaN	NaN	NaN	NaN	NaN	NaN	NaN	0.239946
HMGA2	High mobility group protein HMGI-C		3	45.3	44.259	485410000	-0.92045	0.192429	-0.704538	-1.44586	0.214865	-0.625753	-0.922264	-1.45675	-2.36248	0.411085	2.08814	0.20653	-1.33345	1.11569	-0.60714	NaN	0.442757	-0.596222	-1.34695	-0.315723	-1.43222	1.0782	2.08658	-0.088522	-0.315376	1.34784	0.152252	-4.30272	0.608562	-0.194042	-1.71495	-0.803553	-0.664555	0.0189133	0.749172	0.755793	-1.7538	0.86408	0.277328	-0.899109	0.755507	-0.395868	-0.761965
BLVRA	Biliverdin reductase A		7	30.1	68.253	303480000	-1.96474	NaN	-1.16972	-0.35951	1.3483	0.919182	-0.719326	0.259077	0.0178032	NaN	-0.532488	NaN	NaN	NaN	NaN	NaN	NaN	NaN	-2.29829	NaN	-2.1457	NaN	NaN	NaN	NaN	-2.26748	-0.451357	0.473841	-1.69736	-0.745012	NaN	NaN	-0.263126	NaN	NaN	NaN	NaN	NaN	NaN	NaN	NaN	NaN	1.51666
ACLY	ATP-citrate synthase		20	22.7	178.17	1557400000	1.60275	-0.702259	1.71111	3.06216	3.34773	3.18675	1.82451	2.23649	2.87305	-0.283312	-0.87422	-1.69547	-3.48862	NaN	NaN	-2.85072	-4.2649	-3.17071	1.70139	0.0553474	0.630915	-1.43748	-1.50899	-0.777349	-0.321747	-1.31303	0.378622	1.70438	1.89317	1.05223	NaN	-0.327541	1.1184	-1.0593	-0.509071	-2.24125	-1.3711	-1.55242	-2.79518	-1.44973	NaN	-1.28552	2.97648
SUCLG1	Succinyl-CoA ligase [ADP/GDP-forming] subunit alpha, mitochondrial		2	9	14.175	74661000	-2.10217	NaN	-2.56363	-1.8204	-0.947891	-1.93109	NaN	-2.23552	-1.60409	NaN	-2.99014	NaN	NaN	NaN	NaN	NaN	NaN	NaN	-2.33372	NaN	NaN	NaN	NaN	NaN	NaN	NaN	-1.55697	NaN	NaN	-2.17417	NaN	NaN	-1.8819	NaN	NaN	NaN	NaN	NaN	NaN	NaN	NaN	NaN	-1.68663
COPA	Coatomer subunit alpha;Xenin;Proxenin		2	1.8	10.675	96151000	NaN	NaN	-3.17092	NaN	NaN	NaN	-3.2713	NaN	-3.09031	NaN	NaN	NaN	NaN	NaN	NaN	NaN	NaN	NaN	NaN	NaN	NaN	NaN	NaN	NaN	NaN	NaN	NaN	NaN	NaN	NaN	NaN	NaN	NaN	NaN	NaN	NaN	NaN	NaN	NaN	NaN	NaN	NaN	NaN
SLC16A1	Monocarboxylate transporter 1		2	7.2	11.761	74899000	NaN	NaN	NaN	-1.8116	-0.825394	-2.0287	NaN	-1.97213	-2.44045	NaN	NaN	NaN	NaN	NaN	NaN	NaN	NaN	NaN	-2.19313	NaN	NaN	NaN	-1.74217	NaN	NaN	NaN	NaN	-1.57128	-2.12058	NaN	NaN	NaN	-2.09104	-1.08634	NaN	NaN	NaN	NaN	NaN	NaN	NaN	NaN	-1.88342
SUB1	Activated RNA polymerase II transcriptional coactivator p15		5	42.5	86.148	432180000	0.509329	-1.38117	-0.223913	NaN	-0.369776	-1.35915	-0.52426	NaN	-0.512312	-0.622393	2.13971	1.99023	-1.06514	-3.31042	NaN	-1.00137	-0.581869	0.0258522	-2.80384	NaN	NaN	-0.712864	0.978645	0.559122	0.0377884	NaN	-0.731682	-1.29516	0.584072	-1.22667	NaN	NaN	-1.82193	2.65586	-1.42086	-0.50178	-0.193504	0.246199	NaN	-1.08584	-0.952908	-0.825218	-2.23734
USP14	Ubiquitin carboxyl-terminal hydrolase 14;Ubiquitin carboxyl-terminal hydrolase;Ubiquitin carboxyl-terminal hydrolase		3	8	23.342	120930000	NaN	NaN	NaN	0.120605	-0.915079	-0.612598	-1.76974	-1.26664	-0.149458	NaN	NaN	NaN	NaN	NaN	NaN	NaN	NaN	NaN	-0.526764	-2.10081	-2.46486	NaN	NaN	NaN	NaN	NaN	NaN	-1.09495	-2.61995	-2.55391	NaN	NaN	-2.16612	NaN	NaN	NaN	NaN	NaN	NaN	NaN	NaN	NaN	0.00782394
ALDH18A1	Delta-1-pyrroline-5-carboxylate synthase;Glutamate 5-kinase;Gamma-glutamyl phosphate reductase		10	15.6	80.056	753790000	-0.135275	0.0778446	0.132248	0.535391	1.58065	1.39847	1.04924	1.40368	1.63022	0.747816	0.580742	-0.115025	NaN	NaN	NaN	-0.453629	NaN	NaN	-0.0797443	-1.24326	-0.38015	-0.25889	-0.750366	-1.20016	0.585152	0.611908	0.818064	-0.130106	0.462654	0.502119	-2.34293	-0.29184	1.06269	-1.49757	0.91589	-0.0204811	-1.50136	-2.18386	NaN	-0.0205612	0.676193	0.177576	1.39295
PSMD4	26S proteasome non-ATPase regulatory subunit 4		4	17.2	29.605	103740000	NaN	NaN	-1.86799	-1.4072	-1.53012	-1.43218	-1.27281	NaN	-1.59864	NaN	NaN	NaN	NaN	NaN	NaN	NaN	NaN	NaN	-1.38738	-1.78189	NaN	NaN	NaN	NaN	NaN	NaN	-1.09488	-1.13522	-1.88066	NaN	NaN	NaN	NaN	NaN	NaN	NaN	NaN	NaN	NaN	NaN	NaN	NaN	0.115686
DRG2	Developmentally-regulated GTP-binding protein 2		2	15.6	18.959	12720000	NaN	NaN	NaN	NaN	-3.16291	-2.53429	NaN	NaN	NaN	NaN	NaN	NaN	NaN	NaN	NaN	NaN	NaN	NaN	NaN	NaN	NaN	NaN	NaN	NaN	NaN	NaN	NaN	NaN	-3.2872	NaN	NaN	NaN	NaN	NaN	NaN	NaN	NaN	NaN	NaN	NaN	NaN	NaN	NaN
VCP	Transitional endoplasmic reticulum ATPase		21	36.7	209.43	1629300000	0.226347	0.0159073	0.628651	1.73428	2.07198	1.06251	2.9433	2.63207	4.36394	-0.396626	-2.17276	-2.30927	-1.28867	NaN	NaN	NaN	-1.82189	NaN	1.62995	1.25693	0.936382	-1.20732	-1.58519	-1.515	-0.293013	0.467634	1.08249	2.75037	1.39474	1.11057	NaN	NaN	0.524893	0.410202	0.688114	-3.16472	-0.0886879	-1.14135	NaN	-0.276365	-1.71783	-2.49738	4.7204
MANF	Mesencephalic astrocyte-derived neurotrophic factor		3	22	17.994	47282000	NaN	-3.14521	NaN	NaN	-3.76527	-3.80539	NaN	NaN	NaN	NaN	-1.20871	NaN	NaN	-3.22713	NaN	NaN	-3.30597	-3.5071	NaN	NaN	NaN	NaN	-2.60956	-3.65921	NaN	NaN	-4.01835	NaN	-3.43366	NaN	NaN	NaN	NaN	NaN	NaN	NaN	NaN	NaN	NaN	NaN	NaN	NaN	NaN
SEC13	Protein SEC13 homolog		2	7.7	14.378	136090000	-2.04973	NaN	-1.29372	0.504974	-0.497364	-0.121193	-2.06934	-1.73026	-1.05781	NaN	NaN	NaN	NaN	NaN	NaN	NaN	NaN	NaN	-1.02406	NaN	-2.17342	NaN	NaN	NaN	NaN	-2.13215	-1.49072	-1.56303	-2.23648	-1.90231	NaN	NaN	-1.37216	-2.05934	NaN	NaN	NaN	NaN	NaN	NaN	NaN	NaN	-0.978775
NPEPPS	Puromycin-sensitive aminopeptidase		2	15.4	13.228	92952000	-2.09822	-2.59474	NaN	-2.14877	-0.302423	-1.72714	-2.23271	-2.58564	-2.38279	-2.21553	NaN	NaN	NaN	NaN	NaN	NaN	NaN	NaN	-2.07238	NaN	-3.25116	NaN	NaN	NaN	NaN	NaN	NaN	-2.11451	-2.71433	-2.2923	NaN	NaN	NaN	NaN	-2.1583	NaN	-2.32276	NaN	NaN	NaN	NaN	NaN	NaN
EIF3B	Eukaryotic translation initiation factor 3 subunit B;Eukaryotic translation initiation factor 3 subunit B;Eukaryotic translation initiation factor 3 subunit B;Eukaryotic translation initiation factor 3 subunit B;Eukaryotic translation initiation factor 3 subunit B		4	7.1	27.454	107490000	-1.25218	NaN	-1.89765	-1.49107	-1.06717	-1.67107	-1.64319	-2.43352	-2.16995	NaN	NaN	NaN	NaN	NaN	NaN	NaN	NaN	NaN	-1.26778	NaN	-2.3452	NaN	-2.02433	NaN	NaN	NaN	NaN	-1.76112	-2.40837	-1.9524	NaN	NaN	-2.01295	-1.72803	NaN	NaN	-2.08238	NaN	NaN	NaN	NaN	NaN	-1.78663
ATP5J2	ATP synthase subunit f, mitochondrial		3	72.7	23.611	206920000	-1.38223	-1.70599	-1.4861	-0.583994	0.564674	NaN	NaN	-1.31508	-1.34024	NaN	NaN	-1.99855	NaN	NaN	NaN	NaN	NaN	NaN	-0.0323544	-2.04415	-1.31177	-1.739	-1.48969	-1.8	NaN	-1.29394	-0.963655	-2.18132	-2.13174	-1.85819	NaN	NaN	-2.20706	NaN	-1.80264	NaN	NaN	NaN	-2.16345	NaN	NaN	NaN	-2.42682
MARS	Methionine--tRNA ligase, cytoplasmic		3	5.1	25.557	83734000	NaN	NaN	-1.36728	-0.729124	-1.0897	-1.64439	-1.75159	-0.960302	-0.602724	NaN	NaN	NaN	NaN	NaN	NaN	NaN	NaN	NaN	-0.803869	NaN	NaN	NaN	NaN	NaN	NaN	NaN	NaN	NaN	NaN	NaN	NaN	NaN	-1.10393	NaN	NaN	NaN	NaN	NaN	NaN	NaN	NaN	NaN	-1.83674
EIF6	Eukaryotic translation initiation factor 6		5	32.7	62.565	533940000	-0.183941	0.0732746	0.557335	0.597893	0.740263	1.38311	-0.0258102	0.401693	1.04534	-1.40075	-1.43997	NaN	NaN	NaN	NaN	NaN	NaN	NaN	0.093792	0.0798378	-0.306587	NaN	-1.2326	NaN	NaN	-0.659529	0.411055	-0.1404	0.556122	0.369486	NaN	0.166096	0.396679	NaN	NaN	NaN	NaN	NaN	NaN	NaN	NaN	NaN	0.806467
EPPK1	Epiplakin		1	1.7	7.4196	15270000	-2.9875	NaN	-4.0069	NaN	-3.7968	NaN	NaN	-3.46271	-3.80158	NaN	NaN	NaN	NaN	NaN	NaN	NaN	NaN	NaN	NaN	-4.15196	-3.72396	NaN	NaN	NaN	NaN	NaN	-3.45362	NaN	-4.20401	NaN	NaN	NaN	-2.82511	NaN	-3.58159	NaN	NaN	-3.20495	NaN	NaN	NaN	NaN	NaN
ARPC4-TTLL3			2	19.5	13.242	115010000	NaN	-1.83025	-1.90061	-1.13196	-1.40203	-1.17936	-0.718897	-1.77746	-1.69202	NaN	NaN	NaN	NaN	NaN	NaN	NaN	NaN	NaN	-1.26678	-2.19073	-1.9351	NaN	NaN	NaN	NaN	NaN	-1.6006	-1.46742	-1.37415	-1.8577	NaN	NaN	-1.63918	NaN	NaN	NaN	NaN	NaN	NaN	NaN	NaN	NaN	-1.58792
ELOF1	Transcription elongation factor 1 homolog		1	23.7	10.26	274190000	NaN	0.825249	0.0336456	-1.4619	-0.00109673	0.103195	NaN	NaN	-1.26414	NaN	1.04428	1.99879	NaN	NaN	NaN	0.38553	0.144728	1.0703	NaN	NaN	NaN	NaN	0.349918	1.07021	0.385849	NaN	0.871387	-0.344313	0.062624	NaN	NaN	NaN	NaN	1.16211	0.840359	NaN	NaN	NaN	NaN	0.701014	NaN	NaN	NaN
CD81	CD81 antigen;Tetraspanin;Tetraspanin;Tetraspanin;Tetraspanin;Tetraspanin;Tetraspanin;Tetraspanin;Tetraspanin		2	26.1	10.9	35504000	NaN	NaN	NaN	1.12718	NaN	NaN	NaN	NaN	NaN	NaN	NaN	NaN	NaN	NaN	NaN	NaN	NaN	-1.76113	NaN	NaN	NaN	-1.51234	NaN	-1.35774	-1.51806	NaN	-1.18977	NaN	NaN	NaN	NaN	NaN	NaN	NaN	NaN	NaN	NaN	NaN	NaN	NaN	NaN	NaN	-0.99238
TPI1	Triosephosphate isomerase;Triosephosphate isomerase;Triosephosphate isomerase		3	13.7	24.799	569230000	0.602337	-0.640919	-1.10912	0.053093	-0.27272	-0.200006	0.814209	0.663057	-0.0845737	1.20695	0.0663033	0.193815	0.315134	-0.250669	NaN	0.0984802	0.349276	NaN	-1.04127	-0.846102	-1.07879	1.30537	0.853207	-0.0787277	0.119524	0.783552	0.0637856	0.0078392	0.096035	0.270473	-0.355591	0.352585	-0.338055	2.01124	1.38831	0.869278	1.38909	0.919254	-0.036171	1.74431	0.964746	1.13381	1.46073
SEC61B	Protein transport protein Sec61 subunit beta		1	15.6	11.852	139350000	-0.975269	-2.80796	-2.79517	-2.38209	-1.13247	-1.40881	-1.04848	-2.06782	-1.6397	-1.36539	-2.22337	-2.66481	NaN	NaN	NaN	-1.76304	-2.31669	-2.72697	-2.38719	-1.86302	-3.26278	-1.20206	-2.11581	-1.88099	-1.75389	-1.223	-0.619801	-2.61791	-2.99441	-2.39823	-3.05607	-2.03858	-2.12826	0.427526	-1.05733	-1.06302	-0.519079	-1.49565	-1.36646	-1.17512	-1.22184	-1.52129	-1.556
ERVFC1	Endogenous retrovirus group FC1 Env polyprotein;Surface protein;Transmembrane protein		1	2.9	7.3723	12602000000	2.95247	4.19287	4.47918	4.09139	4.25097	3.88866	4.23709	2.91706	2.63208	5.22923	5.78223	5.28918	3.12477	3.93929	2.79127	6.16107	4.80273	5.48844	4.29444	4.09926	4.24117	5.09661	4.83993	5.49127	5.66501	3.81469	4.59767	4.43806	4.63785	4.63386	4.90623	4.16448	2.8612	4.97818	5.24072	5.42914	NaN	NaN	NaN	4.80851	5.64793	5.32634	3.74863
ACTC1	Actin, alpha cardiac muscle 1		1	74.1	38.61	1384700000	1.34956	0.24575	2.90051	2.16044	1.35242	1.1133	1.32905	2.05227	2.10821	0.0901947	-0.245232	-0.343399	-0.442207	0.789907	-0.775434	0.327005	-0.00297928	-0.890213	1.53193	0.529001	1.00581	0.383417	0.274641	0.774233	1.23972	0.413309	1.64938	1.28148	0.850796	1.1197	0.770378	0.802017	1.93742	1.88511	1.28008	0.542347	2.46076	1.71487	1.02713	0.42827	-0.386515	0.158072	2.03983
EIF4A1	Eukaryotic initiation factor 4A-I		22	63.5	323.31	9968500000	3.71735	3.70203	4.75511	4.98697	5.56209	5.55824	3.87349	4.51032	4.86016	2.86935	2.39167	2.84649	0.0307941	1.24126	0.38982	1.81655	1.68901	1.18959	4.4596	3.95939	4.18563	2.96186	2.98078	2.82568	2.07899	3.22272	4.17654	4.60738	4.29038	4.41131	0.636959	3.60054	4.54741	3.15354	2.92703	1.31515	1.941	1.2588	0.190538	2.04049	2.48288	1.20322	4.88531
RPS20	40S ribosomal protein S20		5	31.1	46.112	1950000000	1.88705	1.82033	2.29871	1.58437	2.30669	2.50536	2.52435	1.96664	2.17504	0.896475	0.479826	0.316551	NaN	-0.702585	NaN	0.0860481	-0.10602	-0.697971	2.66599	2.55685	1.41635	1.35462	0.472155	0.641541	1.55131	1.41432	2.35152	2.19176	2.58463	1.96602	-1.93583	NaN	1.37301	1.22602	1.0071	-0.174038	0.896856	-0.912376	-2.00138	1.10042	NaN	0.290911	3.26113
PRPS1	Ribose-phosphate pyrophosphokinase 1		1	17.6	46.056	370510000	NaN	-0.609058	-0.00850296	0.0164337	0.706955	0.642895	-0.658934	-0.267784	0.697088	NaN	NaN	NaN	NaN	NaN	NaN	NaN	NaN	NaN	-0.193834	-1.57198	-0.00723267	NaN	NaN	-1.41628	NaN	-0.24263	-0.629374	0.383654	0.0611153	0.750839	NaN	NaN	-0.295782	NaN	NaN	NaN	NaN	NaN	NaN	NaN	NaN	NaN	0.90634
PSMA6	Proteasome subunit alpha type-6;Proteasome subunit alpha type;Proteasome subunit alpha type;Proteasome subunit alpha type;Proteasome subunit alpha type		6	36.5	38.166	449660000	-0.0617676	-0.862473	-0.438738	-0.125954	0.111013	0.480047	0.120777	0.455212	0.657335	-0.586418	NaN	NaN	NaN	NaN	NaN	NaN	NaN	NaN	-0.462219	NaN	-0.499157	NaN	NaN	NaN	-1.91137	-0.210186	0.895109	-0.0166092	-0.0702953	0.958315	NaN	-0.551975	0.33152	-1.4517	NaN	NaN	-0.269369	NaN	NaN	-0.755886	NaN	NaN	2.2982
CDC42	Cell division control protein 42 homolog		5	42.4	50.138	1077500000	0.41618	-0.451328	-0.27755	1.30309	2.71931	1.97551	0.503864	1.48825	1.88673	-0.762646	-1.65645	-0.929396	NaN	-1.66801	NaN	-1.59647	NaN	NaN	1.93031	0.879644	1.0757	-0.632763	-0.682428	-1.28876	NaN	0.472721	0.833233	-0.205811	1.43797	0.992229	NaN	-1.0506	0.283695	-1.51192	NaN	NaN	-1.27228	-1.09067	-1.33299	-0.737913	NaN	NaN	3.16716
DSTN	Destrin		1	8.9	7.9837	101400000	NaN	NaN	NaN	NaN	-1.79692	-0.853508	NaN	NaN	0.43013	-2.48092	NaN	NaN	NaN	NaN	NaN	NaN	NaN	NaN	-0.219175	-2.88657	-0.592451	NaN	NaN	NaN	NaN	-2.24357	NaN	NaN	NaN	NaN	NaN	NaN	-0.976738	NaN	NaN	NaN	NaN	NaN	NaN	NaN	NaN	NaN	NaN
RAB8A	Ras-related protein Rab-8A		3	19.3	27.933	194640000	-1.82427	NaN	-3.0248	-0.471445	0.0571976	0.189573	-0.509499	-0.460541	-0.40416	NaN	NaN	NaN	NaN	NaN	NaN	NaN	NaN	NaN	-1.11216	-1.57983	-1.34466	NaN	-1.65146	NaN	NaN	-1.36784	-0.186895	NaN	-0.792618	-0.378456	NaN	NaN	NaN	NaN	NaN	NaN	NaN	NaN	NaN	NaN	NaN	NaN	-1.20478
RAB			4	29.8	30.048	71224000	NaN	NaN	NaN	-1.46609	-0.395258	-2.02276	NaN	-1.98273	-1.84758	NaN	NaN	NaN	NaN	NaN	NaN	NaN	NaN	NaN	NaN	NaN	NaN	NaN	NaN	NaN	NaN	NaN	-2.45163	NaN	-2.17303	-2.17226	NaN	NaN	NaN	NaN	NaN	NaN	NaN	NaN	NaN	NaN	NaN	NaN	NaN
RAB5B	Ras-related protein Rab-5B		3	28.4	35.962	93363000	-1.61466	NaN	-1.65338	-1.62153	-1.11843	-1.46506	-1.47064	-2.02172	-1.51954	NaN	NaN	NaN	NaN	NaN	NaN	NaN	NaN	NaN	-2.01239	NaN	-2.57872	NaN	NaN	NaN	NaN	NaN	-1.24617	-2.22351	-1.55613	-1.66727	NaN	NaN	-1.46346	NaN	NaN	NaN	NaN	NaN	NaN	NaN	NaN	NaN	-2.19947
RAB10	Ras-related protein Rab-10		2	17	13.923	251090000	-1.43371	NaN	-0.386705	-0.687422	0.61334	-0.347452	-2.23315	-1.05419	-1.15929	NaN	-2.89456	-1.37144	NaN	NaN	NaN	NaN	NaN	NaN	-0.467836	-1.73471	-0.567133	-0.861612	-1.37799	-2.4446	NaN	-0.826159	0.259977	-1.4677	0.394197	-1.47833	NaN	-2.68244	-1.76727	-1.46998	NaN	NaN	NaN	-2.8384	-2.42585	NaN	NaN	NaN	-2.37387
UBE2D3	Ubiquitin-conjugating enzyme E2 D3		2	35.7	33.281	310860000	-0.701729	-0.953222	-0.201708	1.20799	0.367655	-0.144131	-0.620058	-0.435312	-0.270853	NaN	NaN	NaN	NaN	NaN	NaN	NaN	NaN	NaN	-0.116764	-1.25703	-0.518587	NaN	-2.20889	NaN	NaN	-0.934992	0.330477	-0.874357	-0.969587	-0.282001	NaN	NaN	-0.698376	NaN	-2.30079	NaN	NaN	NaN	NaN	NaN	NaN	NaN	1.47812
RAB14	Ras-related protein Rab-14		9	51.6	150.55	771010000	NaN	-1.82818	-0.772657	0.827383	3.17788	1.88094	-1.31043	-0.306559	1.36283	-0.885553	-0.62328	0.00628471	NaN	NaN	NaN	NaN	NaN	NaN	0.198349	-0.198395	-1.2437	NaN	NaN	NaN	NaN	-0.302494	1.05338	0.355713	0.99362	1.38512	NaN	NaN	-1.24101	-1.43392	-0.655306	NaN	NaN	NaN	NaN	NaN	NaN	NaN	-0.63909
ABCE1	ATP-binding cassette sub-family E member 1		1	3.8	6.5205	15604000	NaN	NaN	NaN	NaN	-3.87089	NaN	NaN	NaN	-2.5523	NaN	NaN	NaN	NaN	NaN	NaN	NaN	NaN	NaN	NaN	NaN	NaN	NaN	NaN	NaN	NaN	NaN	NaN	-3.0407	NaN	NaN	NaN	NaN	NaN	NaN	NaN	NaN	NaN	NaN	NaN	NaN	NaN	NaN	NaN
RAP1B	Ras-related protein Rap-1b		5	35.8	36.586	426530000	-0.726984	-0.339825	0.117165	-0.381145	0.701292	0.711765	-0.430489	0.29208	0.189594	NaN	NaN	NaN	NaN	NaN	NaN	NaN	NaN	NaN	-0.450989	0.196373	0.758495	NaN	NaN	-3.21447	NaN	-0.629555	0.364861	0.0543461	-0.533665	0.477301	NaN	-1.17999	-0.20006	NaN	NaN	NaN	NaN	NaN	NaN	NaN	NaN	NaN	1.17634
RPS3A	40S ribosomal protein S3a;40S ribosomal protein S3a;40S ribosomal protein S3a;40S ribosomal protein S3a;40S ribosomal protein S3a;40S ribosomal protein S3a		5	35.1	36.94	418490000	0.148081	-0.884308	-1.20909	-0.440594	-0.11659	-0.310211	-0.865915	-1.11141	-0.0546646	-0.99938	-1.41391	NaN	NaN	-1.97293	NaN	NaN	-1.80721	-2.37006	0.482332	-2.12156	-0.633101	-0.800907	-0.579594	-1.16487	-0.374287	0.0714245	-0.056057	0.474947	-0.731466	-0.495865	NaN	-1.33296	-1.18483	-0.160849	0.102942	NaN	-0.659081	-0.769695	-1.75524	1.07394	-0.0589714	NaN	1.58352
RL26			6	30.3	36.43	830690000	2.41357	-0.170984	-0.00932884	0.66758	1.46382	0.730867	-0.0307522	0.386053	0.910105	0.0299587	-1.52901	NaN	NaN	-0.152594	-3.4004	-1.38682	0.283157	NaN	2.75901	0.230396	1.6873	0.347401	0.362793	0.0463715	NaN	-0.118702	0.0599689	-0.554609	0.114872	0.735271	NaN	-0.471342	0.140228	-0.0817394	-0.735609	NaN	-1.17057	NaN	NaN	-1.57139	NaN	NaN	-0.772175
RPL15	60S ribosomal protein L15;Ribosomal protein L15;Ribosomal protein L15;Ribosomal protein L15;Ribosomal protein L15;Ribosomal protein L15		8	41.4	71.859	1128800000	0.0811024	1.02398	1.37465	0.635145	3.10742	1.68177	-0.328377	0.677984	0.459677	0.556805	-0.882147	-0.602745	NaN	0.0294151	-1.13228	NaN	NaN	NaN	1.04188	0.978601	1.84349	NaN	1.8587	-1.32057	NaN	-0.0210667	2.28985	0.388355	1.61956	1.98628	NaN	-0.373014	-0.52743	-1.34074	NaN	NaN	NaN	-0.57618	-0.0809155	NaN	-2.09736	NaN	-0.953232
RPL27	60S ribosomal protein L27;60S ribosomal protein L27;60S ribosomal protein L27;60S ribosomal protein L27;60S ribosomal protein L27		4	38.2	24.41	628500000	-1.24794	0.122751	0.0612087	0.24613	1.12068	0.70822	-0.0223141	0.176998	0.0738411	0.747252	-0.518829	-0.953932	NaN	-1.52492	-1.16342	-1.90207	-1.50018	NaN	1.7241	0.431038	0.239147	0.369818	0.0668335	-0.810604	-1.70871	-0.0878792	0.874586	0.699516	0.359821	0.797949	-0.267307	-0.895737	-0.589905	NaN	0.600863	NaN	NaN	0.162733	-1.76571	0.0776119	NaN	NaN	-0.413141
RPL37A	60S ribosomal protein L37a		2	39.7	17.079	144340000	NaN	NaN	NaN	-1.83062	-0.808527	-1.38101	NaN	-2.47944	NaN	NaN	-2.20088	NaN	NaN	NaN	NaN	NaN	NaN	NaN	NaN	NaN	NaN	NaN	-2.27346	NaN	-5.46159	-3.41088	0.857037	-2.30627	-0.848223	0.444191	NaN	NaN	NaN	-3.06457	NaN	NaN	NaN	NaN	NaN	NaN	NaN	NaN	NaN
RHOC	Rho-related GTP-binding protein RhoC		5	25.9	31.115	237730000	NaN	-2.5769	-1.44996	-1.97089	-0.631535	-0.319788	-2.49365	NaN	-1.43252	NaN	NaN	NaN	NaN	NaN	NaN	NaN	NaN	NaN	-0.144041	-2.82423	-2.23938	NaN	NaN	NaN	NaN	-2.28734	0.0293026	0.370523	-1.23495	-0.962669	NaN	NaN	-2.58875	-2.24006	NaN	NaN	NaN	NaN	NaN	NaN	NaN	NaN	2.21637
HSPE1	10 kDa heat shock protein, mitochondrial		1	25.5	7.6199	24353000	NaN	NaN	NaN	NaN	NaN	NaN	-2.14097	NaN	-3.4352	NaN	NaN	NaN	NaN	NaN	NaN	NaN	NaN	NaN	-1.39028	NaN	NaN	NaN	NaN	NaN	-1.57779	-2.54851	NaN	NaN	NaN	NaN	NaN	NaN	NaN	NaN	-1.36775	NaN	-1.99898	NaN	NaN	NaN	NaN	NaN	-2.50317
B2M	Beta-2-microglobulin;Beta-2-microglobulin form pI 5.3;Beta-2-microglobulin		1	18.5	20.135	29469000	NaN	NaN	NaN	-1.9882	-1.16497	NaN	NaN	NaN	NaN	NaN	NaN	NaN	NaN	NaN	NaN	NaN	NaN	NaN	NaN	NaN	NaN	NaN	NaN	NaN	NaN	NaN	NaN	-2.49952	NaN	NaN	NaN	NaN	NaN	NaN	NaN	NaN	NaN	NaN	NaN	NaN	NaN	NaN	-2.73599
DAD1	Dolichyl-diphosphooligosaccharide--protein glycosyltransferase subunit DAD1;Dolichyl-diphosphooligosaccharide--protein glycosyltransferase subunit DAD1;Dolichyl-diphosphooligosaccharide--protein glycosyltransferase subunit DAD1;Dolichyl-diphosphooligosaccharide--protein glycosyltransferase subunit DAD1		1	15.4	6.5	68485000	NaN	NaN	-1.8033	-0.0757542	-1.50541	-1.48036	NaN	-1.47308	-2.43866	NaN	NaN	NaN	NaN	NaN	NaN	NaN	NaN	NaN	-1.7352	NaN	-0.603237	NaN	NaN	NaN	NaN	NaN	-2.41512	-2.72875	NaN	NaN	NaN	NaN	-2.15425	NaN	NaN	NaN	NaN	NaN	NaN	NaN	NaN	NaN	NaN
SUMO2	Small ubiquitin-related modifier 2;Small ubiquitin-related modifier		3	45.1	20.601	548780000	0.493856	-0.0684242	0.582151	0.508326	0.270992	1.13538	0.454834	-0.147205	0.413654	0.253164	-0.574938	-0.760376	-0.770885	-0.590015	-1.37086	0.82234	-0.541544	-0.731525	0.222763	-0.616394	-0.146088	0.048111	-0.412952	-0.887791	0.556808	1.10581	2.29904	0.167189	-0.7122	0.310871	NaN	-1.09284	0.369768	0.977228	0.320744	0.500854	0.441662	0.422333	-1.12613	-0.0556087	-0.546574	-0.169308	0.468369
WDR5	WD repeat-containing protein 5		3	15.3	32.427	284320000	0.174231	-1.76442	-1.96744	-0.478497	0.340382	1.00894	-0.429016	0.282715	0.0697479	NaN	-1.71307	NaN	NaN	NaN	NaN	NaN	NaN	NaN	-2.23117	-2.0994	-1.60525	-0.987583	NaN	NaN	NaN	0.174084	2.01584	NaN	0.149443	-0.476156	NaN	NaN	0.0632515	NaN	NaN	NaN	NaN	NaN	NaN	NaN	NaN	NaN	NaN
HNRNPK	Heterogeneous nuclear ribonucleoprotein K		14	39.8	109.98	1158800000	0.548292	0.471725	2.81574	0.523359	1.90053	0.874617	-0.0375805	0.34264	0.0900936	-0.0722637	-0.161924	-1.18585	-1.33835	0.18248	NaN	0.184608	0.617105	-0.625463	-0.637625	0.704912	0.319338	0.764103	0.188343	0.378527	-1.07351	0.781185	-0.0848408	0.69215	0.200415	0.174231	-1.46302	NaN	0.689081	0.475676	0.964781	0.359402	1.03028	-0.233145	-1.23206	2.56123	0.580921	NaN	0.201801
RRAS2	Ras-related protein R-Ras2		2	18.9	13.052	27481000	NaN	NaN	NaN	NaN	-2.93542	-3.15757	NaN	-3.53059	-3.20483	NaN	NaN	NaN	NaN	NaN	NaN	NaN	NaN	NaN	-3.59344	NaN	NaN	NaN	NaN	NaN	NaN	NaN	-2.70799	NaN	-3.4423	-2.58669	NaN	NaN	NaN	NaN	NaN	NaN	NaN	NaN	NaN	NaN	NaN	NaN	NaN
RPS7	40S ribosomal protein S7		10	57.2	98.684	2008800000	-0.699375	1.36283	2.50664	2.52227	2.00759	2.06994	2.41567	2.8211	3.69306	-0.452253	-0.0630436	-0.00628662	NaN	-0.515343	NaN	-0.169441	-1.01785	-1.25957	2.23964	1.87572	2.01808	0.00342369	0.0483246	0.13097	-1.24526	-0.314169	1.37133	3.15952	3.24077	2.32149	-1.0124	0.447195	1.6952	-0.0471401	0.776371	-1.63855	-0.518164	1.44478	-0.861851	-0.125994	-0.814772	-1.47213	2.1813
PPP1CA	Serine/threonine-protein phosphatase PP1-alpha catalytic subunit;Serine/threonine-protein phosphatase		1	11.5	17.962	70249000	NaN	NaN	NaN	-2.11984	-2.33727	-2.63315	NaN	NaN	NaN	NaN	-3.69111	NaN	NaN	NaN	NaN	NaN	NaN	NaN	-2.84361	NaN	NaN	NaN	NaN	NaN	-2.86365	-2.68762	-2.06712	-1.84159	-2.93879	-2.18361	NaN	NaN	NaN	NaN	NaN	NaN	NaN	NaN	NaN	NaN	NaN	NaN	-0.271603
NCS1	Neuronal calcium sensor 1	+	27	83.7	323.31	66824000000	NaN	NaN	NaN	NaN	NaN	NaN	NaN	NaN	NaN	NaN	NaN	NaN	NaN	NaN	NaN	NaN	NaN	NaN	NaN	NaN	NaN	-0.0570278	NaN	NaN	NaN	NaN	NaN	NaN	NaN	NaN	NaN	NaN	NaN	12.6815	10.9214	11.1415	NaN	NaN	NaN	-2.03714	NaN	-4.64561	NaN
PSMC1	26S protease regulatory subunit 4	+	36	72.7	323.31	28800000000	-8.78101	-9.77692	-8.94143	-11.327	-10.8172	-10.4948	-8.77553	-8.60975	-8.08174	NaN	-11.2806	-11.5833	NaN	-12.0628	NaN	-11.2718	NaN	-11.3531	-8.67657	-9.26254	-9.31479	NaN	-11.6279	NaN	-10.2317	NaN	-9.27515	-9.85847	-10.7518	-10.3565	NaN	NaN	-11.0543	-10.3905	-10.5166	-10.5866	-9.06703	NaN	NaN	-12.2552	-12.1471	-11.6553	-8.49992
PSMC5	26S protease regulatory subunit 8		1	9.4	6.8692	2702100000	NaN	NaN	NaN	-8.45774	NaN	NaN	NaN	-7.13422	-7.71432	NaN	NaN	NaN	NaN	NaN	NaN	NaN	NaN	NaN	NaN	NaN	NaN	NaN	NaN	NaN	NaN	NaN	NaN	NaN	NaN	NaN	NaN	NaN	NaN	NaN	NaN	NaN	NaN	NaN	NaN	NaN	NaN	NaN	-6.47033
RPS8	40S ribosomal protein S8;40S ribosomal protein S8		13	59.1	267.83	4948700000	2.48926	3.47033	3.78255	2.98849	4.21512	3.71899	0.634785	3.64041	3.57187	1.25294	3.46302	2.66532	NaN	2.57656	1.05001	1.89767	1.34105	1.73494	3.01288	3.76274	3.4827	1.59684	2.34307	2.27192	-0.791063	3.45082	4.85792	2.40392	3.90084	3.79717	NaN	1.32651	2.28449	2.30595	2.062	NaN	0.310268	2.24542	1.42742	1.34704	1.06912	-0.517897	0.910711
RPS15A	40S ribosomal protein S15a		9	62.3	74.826	2083900000	-0.615295	0.530472	1.34262	1.07031	2.48455	2.34187	1.28679	0.571821	2.3796	-0.484333	NaN	-1.79528	NaN	NaN	NaN	-1.13482	-2.3465	NaN	2.38392	2.10653	2.01143	-0.521128	-1.59539	NaN	-0.481726	0.345631	1.20993	3.29737	2.98315	3.11728	NaN	-1.46047	0.297369	-0.978624	-1.46518	NaN	-0.596836	-1.05708	-2.14202	NaN	NaN	-2.02617	3.76691
RPS16	40S ribosomal protein S16		6	40.4	40.382	998920000	-0.1234	0.595112	1.44748	1.30527	1.17483	0.936193	0.915297	1.46543	1.28273	0.00883675	-0.148195	-0.213913	NaN	-0.20639	NaN	0.173378	-0.805153	-0.675964	1.82268	1.18703	1.76167	0.563484	0.226021	-0.156868	-0.729366	0.302607	2.29069	1.44153	1.25408	0.977648	NaN	NaN	0.115381	1.54645	1.33091	NaN	0.0859241	0.319517	NaN	0.298496	-0.0871162	-1.14979	-0.0578575
YWHAE	14-3-3 protein epsilon		2	9	15.978	355610000	0.117985	-0.493149	0.103592	0.700106	-0.349873	0.0690327	0.0506287	0.216703	-0.630844	-0.79706	NaN	NaN	-1.84788	-1.22145	NaN	NaN	-2.50181	NaN	0.527008	-0.642662	-0.796169	NaN	NaN	-1.0402	NaN	NaN	NaN	-0.496525	-1.16017	-0.732172	-1.40446	-1.36571	0.601562	-0.530931	0.400192	NaN	0.45306	-0.524553	-2.08433	-0.743156	-0.418764	-0.278086	0.388044
RPS14	40S ribosomal protein S14		8	35.1	145.98	1811400000	0.833736	0.0857487	1.41898	2.18388	2.6265	1.70565	1.87057	2.51953	3.18656	-0.355377	0.547279	-2.13449	NaN	-1.24347	NaN	-0.800962	-1.03719	-2.89905	2.23503	1.48249	2.12525	1.15861	-0.061121	-0.339642	0.779541	2.20218	3.16238	1.80048	2.38839	2.60556	-2.66232	0.674873	2.43954	0.338699	0.161081	-0.777281	-0.743517	0.122028	-0.671942	0.381508	-0.225748	-3.29848	3.24996
RPS23	40S ribosomal protein S23		6	49	76.089	2163300000	0.17799	1.5215	2.43474	2.21226	3.17998	3.27014	1.02364	1.91268	2.43798	0.945736	0.22913	0.426331	-3.97174	-0.246984	-0.718801	-0.92947	-3.06182	-1.09976	1.73331	2.27033	2.10396	1.13505	1.51546	0.150789	-2.23293	1.92702	3.76961	1.2747	2.94005	3.84723	-3.12235	0.129667	1.18825	1.07437	0.00502014	NaN	-1.76556	-0.443048	0.177065	0.123686	-0.973421	-0.899868	0.645531
RPS13	40S ribosomal protein S13		1	9.5	7.3067	43081000	-2.51406	NaN	NaN	-2.72992	NaN	-3.18413	-3.05288	-3.35191	-4.43694	NaN	NaN	NaN	NaN	NaN	NaN	NaN	-2.60643	NaN	-0.221975	-3.97753	NaN	NaN	NaN	-3.04646	NaN	-2.92101	-2.95848	-2.5039	-3.2249	-2.98933	NaN	NaN	NaN	NaN	NaN	-3.31186	NaN	NaN	NaN	-3.66423	-3.26373	-3.64573	-2.4247
RPS11	40S ribosomal protein S11		10	57	91.994	3286800000	2.5505	2.39214	3.80955	1.58871	3.9499	3.75481	2.27786	3.42567	3.47156	-0.596785	0.666451	0.0563335	-3.20909	0.230238	-2.06507	-0.450151	-3.54795	-0.559052	3.1282	2.88288	3.06722	0.450319	1.07174	0.0511742	-0.504091	2.64634	3.79616	2.05883	3.09526	3.58555	NaN	1.03811	1.73731	1.55117	1.32798	-3.72632	-3.01643	0.00526047	0.194658	-0.330729	-0.166927	NaN	0.548983
SNRPE	Small nuclear ribonucleoprotein E		1	12	6.8364	28538000	NaN	NaN	NaN	-2.17785	-2.62024	-2.2454	NaN	NaN	NaN	NaN	NaN	NaN	NaN	NaN	NaN	NaN	NaN	NaN	-1.81157	NaN	NaN	NaN	NaN	NaN	NaN	NaN	-3.19708	-2.74906	NaN	NaN	NaN	NaN	NaN	NaN	-2.61514	NaN	NaN	NaN	NaN	NaN	NaN	NaN	-2.79612
SNRPF	Small nuclear ribonucleoprotein F		2	24.4	22.626	282970000	-0.270575	-0.383543	-1.03146	-0.246176	-0.516853	-0.0574188	-1.11745	-0.267302	-0.20978	NaN	NaN	NaN	NaN	NaN	NaN	NaN	NaN	NaN	-0.523903	-0.861013	-1.31082	-1.86198	-1.64187	NaN	NaN	-1.17447	-1.19687	-1.22789	-0.584244	-0.801758	NaN	-1.09105	0.443846	-0.980658	NaN	NaN	NaN	-1.11822	NaN	NaN	NaN	NaN	-0.736795
SNRPD1	Small nuclear ribonucleoprotein Sm D1		4	54.6	76.392	1924900000	NaN	1.11036	2.932	1.61964	5.24879	1.73836	NaN	1.37121	2.57532	-0.972483	0.234962	-0.490303	NaN	NaN	NaN	-1.24387	-1.40194	-1.82725	2.25686	0.361446	0.620016	-1.03409	-1.31464	-1.01191	NaN	-1.55297	0.0921421	-1.31924	1.14745	1.08739	NaN	NaN	NaN	-1.0151	-0.955776	NaN	NaN	NaN	NaN	NaN	-1.17442	-1.89338	-1.47288
SNRPD2	Small nuclear ribonucleoprotein Sm D2		6	37.3	39.067	721520000	0.335075	-0.165678	-0.329325	-0.4168	0.995005	0.881929	-0.500036	0.803362	0.71574	-2.68472	NaN	-1.30907	NaN	NaN	NaN	NaN	NaN	-2.02696	0.67079	0.284111	-0.73424	-1.27907	NaN	-1.11889	NaN	1.76641	2.17637	0.670177	-0.258392	0.980717	NaN	-0.993797	0.91992	-1.45683	-1.51477	-2.32412	-1.21772	-1.47416	NaN	-1.07645	NaN	-1.35112	2.71217
SNRPD3	Small nuclear ribonucleoprotein Sm D3		3	21.7	18.763	545690000	-0.438929	0.234312	0.673986	0.669027	0.774921	0.718403	0.00249863	0.300692	1.21911	-1.09863	-1.04524	-1.64467	NaN	NaN	NaN	NaN	NaN	NaN	-0.0788651	0.0434895	0.605761	-0.781227	-0.781965	-1.00246	-0.997576	0.117205	0.491543	0.791027	0.613916	0	-0.965384	-1.24648	0.804138	-1.08934	-0.743059	-1.34887	-0.995527	-1.29096	NaN	-1.38777	-0.67622	-2.13281	1.27821
RPL7A	60S ribosomal protein L7a		10	38.3	109.56	2026700000	1.16945	2.12348	2.22096	1.89095	2.95518	2.35083	1.1011	1.5964	2.19386	0.788967	1.57205	1.94045	-1.05069	0.11063	-0.409082	0.26808	0.465876	-0.204493	2.29345	2.83252	2.59653	0.719366	2.20933	0.69146	-0.885328	1.62768	2.51415	1.45521	2.74876	2.32643	NaN	0.502121	0.761734	1.50435	1.53876	-0.761654	-0.0227985	1.00282	-0.229948	0.204836	0.28302	-1.00232	0
RAB11A	Ras-related protein Rab-11A		5	34.2	31.855	278870000	-1.31394	-1.32435	-0.708132	-0.808702	0.323704	0.0472183	-0.400265	-0.0810261	0.683292	-1.34051	NaN	NaN	NaN	NaN	NaN	NaN	NaN	NaN	0.422945	-1.31443	-1.22643	NaN	NaN	NaN	NaN	-1.18328	-1.12932	-0.908556	NaN	NaN	NaN	NaN	0.0520267	NaN	NaN	NaN	-0.52282	NaN	NaN	NaN	-1.58301	NaN	1.01735
ETF1	Eukaryotic peptide chain release factor subunit 1		2	29.5	11.695	78857000	-1.6571	NaN	NaN	-1.53643	-1.21665	-1.23927	NaN	-1.35722	-1.18163	NaN	NaN	NaN	NaN	NaN	NaN	NaN	NaN	NaN	-1.52111	NaN	NaN	NaN	NaN	NaN	NaN	-2.38785	-1.4137	-1.2443	-1.47248	-2.05906	NaN	NaN	-1.55494	NaN	NaN	NaN	NaN	NaN	NaN	NaN	NaN	NaN	-1.50045
RPS4X	40S ribosomal protein S4, X isoform;40S ribosomal protein S4		13	48.7	90.158	1464300000	0.624104	0.985802	2.39779	1.16539	2.1285	1.66371	0.706299	1.67049	2.2587	-0.425087	-0.524584	-1.48538	NaN	-1.64982	-1.28296	-0.808908	-1.08132	-2.6568	2.55928	1.23088	1.76041	0.28186	0.151237	-0.780924	-0.0616169	1.38252	2.78876	2.7834	1.782	1.61152	-1.08413	0.0171661	1.37766	0.424135	0.0145016	-1.02246	0.479334	-0.0790329	-0.469301	1.18626	-0.539286	-0.926353	2.83855
RPL23A	60S ribosomal protein L23a		14	54.5	141.19	17721000000	5.29113	5.95507	5.0765	4.0951	4.9305	4.50595	4.43266	4.4264	4.04184	5.8298	6.79193	6.4497	3.84366	5.35714	4.47715	5.5477	5.73244	5.36345	4.20604	4.36023	4.16156	5.69132	6.54673	6.59312	5.29266	4.0274	5.5966	5.04386	5.57601	4.5339	5.08498	5.15029	4.74483	5.92547	5.68149	4.97712	4.94445	6.24933	5.01448	5.66693	5.73512	4.80971	3.53022
RPS6	40S ribosomal protein S6;40S ribosomal protein S6;40S ribosomal protein S6;40S ribosomal protein S6		12	44.6	145.54	2697800000	-0.477106	0.0980282	2.45982	0.976269	4.08265	3.37658	0.967358	2.83571	2.22037	-1.19839	-0.558256	-0.19964	NaN	NaN	NaN	NaN	NaN	NaN	2.90978	2.2627	0.854549	-0.234049	0.347813	-0.402802	-0.70645	1.98563	2.36181	0.854456	3.56021	2.94476	NaN	0.0822468	-0.21085	1.80404	-0.0469589	NaN	NaN	-2.10186	-2.49982	-3.28655	-0.392015	-3.30578	0.200106
HIST1H4A	Histone H4		9	58.3	60.608	5269400000	2.13689	4.42675	3.8197	3.0353	2.15438	1.826	3.67365	3.72051	2.05256	5.20699	3.15853	1.25295	1.52613	3.4781	0.0866013	1.6249	4.00327	0.821129	4.6526	3.26746	2.76751	4.14669	3.44447	1.96103	4.11636	3.19235	1.59409	2.8425	3.05115	1.56513	0.769812	2.56617	1.56829	2.24317	4.99038	2.84743	5.26587	4.46465	0.524343	1.84393	4.37633	2.82208	3.00907
RAB1			4	58	91.378	1481200000	-0.754234	-0.696566	1.53141	2.66038	3.04879	2.92972	1.13183	1.87259	2.29459	-0.980185	-0.698273	-1.0201	-1.65689	-1.54239	-2.21443	NaN	NaN	NaN	1.86225	1.76465	2.06156	-1.06602	-1.55553	NaN	NaN	-1.79676	2.25824	0.115232	1.72102	1.96066	-1.11666	-0.743578	0.00555038	-1.05478	-1.15961	NaN	-1.54045	-1.98223	-2.4889	-2.21858	NaN	NaN	-0.331318
RAN	GTP-binding nuclear protein Ran		14	50.5	172.34	8889600000	3.20597	3.35895	3.86249	5.30149	5.61942	5.38046	3.41166	3.94538	4.43011	2.336	1.56053	2.6738	-1.55914	1.02562	-0.0725155	0.503237	0.659424	-0.271513	4.69221	3.90552	4.89269	3.04366	2.66594	2.08131	0.385532	3.04738	5.12071	3.86976	4.35077	4.72956	-0.688383	2.5087	3.29781	1.12235	2.31519	-0.05159	1.81862	1.79529	0.50415	1.12152	0.918488	-3.23684	3.55316
RPL23	60S ribosomal protein L23		6	40.7	97.156	2976000000	0.95533	1.26108	1.97993	1.94724	4.38128	3.08541	0.630484	2.89527	4.10856	-0.597412	0.0989323	-0.715391	NaN	NaN	NaN	-1.63441	-1.97246	-1.35824	3.27594	1.60891	1.81987	0.362249	-0.970613	-0.8508	-0.443542	1.73032	4.28604	3.24702	3.7157	3.01131	-2.08433	-0.288614	1.77735	-0.800564	-0.728947	-1.83888	-0.832592	-1.13762	-1.07137	-1.57101	NaN	-1.89085	1.56356
RPS24	40S ribosomal protein S24;40S ribosomal protein S24;40S ribosomal protein S24		5	36.9	39.909	1160900000	-1.01012	0.364429	1.0181	0.439915	2.52428	2.16884	-1.29706	0.225904	0.878653	-1.41835	1.51743	0.587425	NaN	-1.03421	-1.87775	NaN	-0.620108	-0.865686	0.389523	-0.180902	0.787014	-0.178276	0.220257	0	NaN	0.145615	1.10099	0.379999	2.0329	1.08951	NaN	NaN	-1.3458	-0.0952911	-1.13832	NaN	NaN	-0.502275	-0.353804	-0.654354	-1.45809	NaN	0.428385
RPS25	40S ribosomal protein S25		3	24	17.207	332690000	-2.58305	1.88706	0.295671	-2.95108	0.0291271	-1.31156	-2.07576	-1.62142	-1.78134	-0.823263	1.4268	0.746712	-3.04261	-1.22734	-0.852377	-2.09849	-0.818752	-0.189241	-1.75766	-1.81336	-0.979876	-1.61199	-0.146362	0.357246	-0.89883	-1.24366	-0.0394058	-2.59988	-0.669729	-1.29597	-0.459181	-0.882553	-1.456	-0.37578	-0.171774	-2.36834	-0.333242	-0.49214	-1.24631	-0.680935	-0.326645	-1.18314	-1.91018
RPS26P11	Putative 40S ribosomal protein S26-like 1		2	20.9	24.911	575150000	-0.934675	0.183607	0.186331	-0.117134	0.247072	0.317657	-0.898371	0.667955	-0.428761	0.137487	0.209475	-0.489231	-1.61732	-0.107031	-1.28296	-0.6735	-0.735191	-0.817991	0.131168	0.765564	0.358969	-0.794125	0.50716	0.0690098	NaN	-0.467272	1.05225	-0.854406	0.861177	-0.109301	-0.97319	-1.07906	-1.05214	0.360664	-0.0344677	NaN	NaN	1.65649	0.165533	-0.106901	-0.523125	NaN	-1.32565
RPS28	40S ribosomal protein S28		8	60.9	116.52	5123200000	2.50923	2.7699	3.6398	3.82432	2.58754	2.40924	3.62883	2.25373	1.95816	4.12054	3.03947	3.8265	2.65496	1.81135	0.769865	4.63721	3.31393	2.93893	3.18512	2.39665	2.23237	4.16781	3.51314	4.21985	5.06746	2.66471	2.34588	4.12521	3.40119	3.28349	5.37869	2.85863	1.92356	4.783	4.28914	4.38052	4.5884	2.7293	1.55459	4.31219	4.39722	4.93048	2.77164
FAU	40S ribosomal protein S30;Ubiquitin-like protein FUBI		4	20.3	29.152	79185000000	6.07246	8.04981	7.69123	6.87536	6.79058	6.70127	7.00741	6.82978	5.91819	8.38068	8.01488	8.40814	5.82079	6.71283	6.25728	8.46788	8.19495	8.0347	6.64062	7.93043	7.60721	7.9272	7.76036	8.4775	8.55588	6.75688	6.91771	7.73501	7.19344	6.96325	7.89991	7.41151	6.80916	8.00203	8.07272	7.64074	8.04175	7.32664	6.42949	8.33371	8.47902	8.71591	6.15919
GNB1	Guanine nucleotide-binding protein G(I)/G(S)/G(T) subunit beta-1		3	19.9	77.717	433800000	0.802095	-0.661694	-0.030468	-0.224136	1.22565	1.12277	-0.398752	0.47518	0.198353	NaN	-1.01478	NaN	NaN	NaN	NaN	-2.49465	NaN	NaN	0.649961	NaN	-0.39657	NaN	NaN	NaN	NaN	0.0988197	0.246807	0.293312	-0.260155	0.137524	NaN	NaN	0.0644588	NaN	NaN	NaN	NaN	NaN	NaN	NaN	NaN	NaN	0.334599
GNB2	Guanine nucleotide-binding protein G(I)/G(S)/G(T) subunit beta-2		2	35.5	20.546	192070000	-0.779936	-1.45985	-0.937908	-0.949177	0.196226	0.158684	-1.35972	-1.27765	-1.1256	NaN	-1.70534	NaN	NaN	NaN	NaN	NaN	NaN	NaN	-1.11656	-1.11888	-1.62288	NaN	NaN	NaN	NaN	NaN	-1.03676	-1.18931	-1.3366	-1.17959	NaN	NaN	-1.19179	NaN	-2.13422	NaN	NaN	NaN	NaN	NaN	NaN	NaN	-1.16238
RPL			4	51.8	47.406	301720000	NaN	-1.61284	-0.480583	0.105663	-0.142008	-0.185511	-1.49458	-0.197989	-0.25955	-2.62153	-2.04534	NaN	NaN	NaN	NaN	NaN	NaN	NaN	0.0414257	-0.972572	0.218098	-1.19474	-2.4062	NaN	NaN	-1.20253	0.992151	-1.16591	-0.894398	-0.129303	NaN	NaN	-1.44328	-1.42696	-1.94345	NaN	-2.74665	-1.72371	NaN	NaN	NaN	NaN	-1.12701
RPL31	60S ribosomal protein L31		2	15.2	13.313	435080000	0.61553	0.364864	-0.553595	-0.664858	-0.421066	-0.516653	-0.00407028	-0.0302887	0.724977	-1.04075	0.573191	-0.72226	-1.60646	NaN	-0.851202	-1.61217	NaN	-0.748327	0.456116	-0.713442	-0.674929	-0.396564	0.517963	-0.407259	-0.176641	0.409559	-0.273525	0.148645	-0.245811	-0.334265	-1.12205	-0.310514	0.535299	-0.79002	-0.65593	NaN	-0.387671	0.421999	-0.750963	-0.850174	NaN	-1.06166	0.226423
RPL10A	60S ribosomal protein L10a;Ribosomal protein;Ribosomal protein		5	31.3	46.613	519890000	-0.462072	-0.981829	-0.476801	1.63557	0.598957	-0.36375	-0.462725	-0.941698	-0.785833	-0.92938	0.0234146	NaN	NaN	NaN	NaN	-1.21645	NaN	NaN	1.59945	-1.70595	1.48466	-0.730759	-1.10471	-1.42731	-1.22136	-1.47507	1.79396	1.10167	0.557055	0.0493336	NaN	NaN	-1.32804	0.107824	-0.346121	-1.05265	-0.369511	-0.942247	-1.35333	0.852133	-1.32174	-1.49226	0.888889
RPL32	60S ribosomal protein L32		3	24.8	17.065	165580000	-0.72427	-1.84529	-2.58293	-1.84778	-2.80877	-1.56693	-1.64415	-1.16862	-2.58219	-2.16282	0.764299	-0.94401	NaN	-1.82722	-2.0484	NaN	NaN	NaN	-0.461966	NaN	-1.14793	NaN	-0.692638	-1.55927	NaN	NaN	-1.84962	-1.59114	-0.56428	NaN	NaN	NaN	-1.15429	-1.61823	NaN	NaN	NaN	-1.00751	-2.51707	-1.2298	-2.5711	NaN	NaN
RPL11	60S ribosomal protein L11		2	38.8	76.987	1942700000	1.99412	-2.18563	1.0843	1.90219	3.35076	2.82973	1.75725	2.75336	3.56537	0.33028	0.190348	0.292608	NaN	-1.2442	NaN	-1.45102	-0.967947	-1.60774	2.24287	0.718893	1.44334	0.473057	0.172897	-0.0359764	0.311291	2.32023	3.5981	1.18347	1.34022	2.3745	-1.99917	-0.0664253	2.52491	0.265093	0.326565	-0.819365	0.625494	-0.538246	-0.697844	0.146202	-0.46036	-0.73703	2.65844
RPL11	60S ribosomal protein L11		1	36.7	6.5405	26666000	NaN	NaN	NaN	NaN	-2.58492	NaN	-2.8271	-2.78185	-1.51832	NaN	NaN	NaN	NaN	NaN	NaN	NaN	NaN	NaN	NaN	NaN	NaN	NaN	NaN	NaN	NaN	NaN	-2.56765	NaN	-3.42039	NaN	NaN	NaN	-3.23758	NaN	NaN	NaN	NaN	NaN	NaN	NaN	NaN	NaN	-2.77688
RPL8	60S ribosomal protein L8		5	21	53.464	777400000	1.52901	-0.0128536	1.24121	0.489859	1.34841	1.17692	0.630013	1.185	0.733673	-0.496161	-1.28023	-1.98533	NaN	-0.959742	NaN	-2.2673	-1.67954	NaN	1.66452	0.384037	-0.814512	0.000951767	0.517145	-0.445164	NaN	1.49566	1.69496	1.09562	1.29512	1.45462	-3.91467	-0.0308304	0.991501	-0.482079	0.0611057	NaN	-1.32614	-0.953213	NaN	-1.1906	-0.473404	-1.99212	0.727932
PPIA	Peptidyl-prolyl cis-trans isomerase A;Peptidyl-prolyl cis-trans isomerase A, N-terminally processed;Peptidyl-prolyl cis-trans isomerase;Peptidyl-prolyl cis-trans isomerase		9	74.5	154.63	4190600000	1.91649	2.16586	3.28191	3.20167	3.07672	3.29978	3.07859	2.51418	3.17666	3.40626	2.24429	3.16808	1.29942	1.16108	0.687136	3.91884	2.6603	1.91299	3.12682	2.42202	2.4362	3.10756	2.64153	2.6411	3.87008	2.48052	3.39699	3.71941	3.45043	3.0861	2.41977	1.59077	3.04395	3.75553	3.12907	2.86696	3.67665	2.26641	0.857233	4.00685	3.41911	3.6806	4.35633
FKBP12-Exin			2	25	14.764	115950000	0.91585	-0.670593	-1.23647	-1.16079	NaN	NaN	-0.30682	-1.78164	-1.86838	-0.273529	NaN	-0.40521	-0.643059	-1.41724	NaN	-0.0940094	-0.969112	NaN	-0.740623	NaN	NaN	-0.0474548	NaN	NaN	1.98631	-1.10196	NaN	-0.373537	NaN	-0.706112	-1.23724	-0.930904	NaN	-0.287134	NaN	-0.172096	NaN	-1.33532	-1.84253	NaN	NaN	1.47552	-0.459349
UBB	Polyubiquitin-B;Ubiquitin		11	60.3	264.7	23903000000	4.64268	4.95858	5.035	5.70062	5.41405	6.12511	4.91257	4.5544	5.78353	5.84019	6.27152	6.61962	2.63229	5.39869	3.9417	6.02192	5.8623	5.7164	4.56616	4.67123	4.97681	5.24152	5.70406	5.55959	5.35954	6.48714	7.6254	5.69396	6.25907	6.12589	5.07134	4.94446	4.37685	5.99243	5.8259	4.90712	5.06303	5.09854	4.96822	5.63908	6.11319	4.88194	6.1444
TRA2B	Transformer-2 protein homolog beta		8	38.2	87.936	1338700000	-0.353407	-0.302628	0.0690422	-0.511669	1.30838	0.727335	-0.116262	-1.42303	-0.774876	-1.04148	0.884686	0.16087	-3.90393	-1.88786	NaN	-0.527838	-1.34598	-0.239025	1.34575	4.85667	2.6648	NaN	-2.78062	-0.679121	-0.621437	-1.4274	-1.3208	-2.0493	0.27413	1.22753	NaN	-1.06052	-0.981709	-0.948374	-1.52646	NaN	-2.86217	-0.732849	-2.78381	-2.37107	-2.33161	NaN	-0.720142
RAC1	Ras-related C3 botulinum toxin substrate 1		7	40.6	50.888	1027200000	0.110138	-0.980167	0.840672	0.322651	1.32561	1.61851	-0.256723	-1.29133	1.77903	-1.98986	NaN	NaN	NaN	-1.65453	NaN	NaN	NaN	NaN	0.897577	0.922651	0.0661316	-3.06905	-0.665546	-2.46879	NaN	-0.519255	1.46609	-0.153553	0.82379	1.52686	-0.804407	-1.73254	-1.68393	NaN	NaN	-1.19701	-1.42991	-1.4857	-0.831421	NaN	-3.22104	NaN	3.3249
YWHAZ	14-3-3 protein zeta/delta		2	44.2	22.109	95527000	NaN	-1.55264	-1.9104	-0.838882	-2.22081	-1.68013	-1.00412	-1.81547	-1.48051	NaN	-3.02185	NaN	NaN	NaN	NaN	NaN	NaN	NaN	-1.66184	-1.61395	-3.05369	-1.92517	NaN	NaN	-2.38799	NaN	-2.16087	-2.11684	-2.78609	-1.87004	-3.25976	NaN	-0.727139	-1.06235	NaN	-1.26505	NaN	-1.76798	NaN	NaN	NaN	NaN	-0.625973
DYNLL1	Dynein light chain 1, cytoplasmic		2	37.1	58.963	250470000	-1.59718	NaN	NaN	2.19329	-0.15889	0.0955048	-0.0998116	-0.909895	-0.202421	NaN	NaN	NaN	NaN	NaN	NaN	NaN	NaN	NaN	0.415928	NaN	-0.613384	-0.664921	NaN	-1.68901	NaN	NaN	-0.761261	0.0237446	-1.67298	-1.05856	NaN	NaN	-0.816439	-0.468805	NaN	-2.48287	-1.33616	NaN	NaN	-1.72943	NaN	NaN	0.466328
RPL38	60S ribosomal protein L38		2	39.1	15.403	202220000	NaN	NaN	NaN	-1.43875	0.257748	0.289062	NaN	NaN	NaN	-1.12399	-1.56952	NaN	NaN	NaN	NaN	-2.06514	-1.98434	-2.41637	-0.283615	-2.22045	-0.726101	-1.59907	-1.44864	-1.15806	NaN	NaN	NaN	1.07026	-0.19702	-1.4692	NaN	NaN	NaN	-1.68396	NaN	NaN	-1.62212	NaN	NaN	-1.7556	-1.34625	NaN	-1.85848
RPS21	40S ribosomal protein S21;40S ribosomal protein S21		2	30.9	22.108	274480000	-0.468334	NaN	NaN	-0.315886	-1.5954	-1.60369	0.693083	-0.867027	-0.794743	-0.96517	NaN	NaN	-0.574366	NaN	NaN	-0.0823116	NaN	-1.28336	-0.381947	NaN	NaN	-1.03672	-0.79409	NaN	0.482121	-1.37352	-0.421946	-0.165049	-1.42848	-1.30111	0.708851	-0.894957	-1.09655	-0.00625229	0.0787029	0.556877	1.54271	1.02456	NaN	-0.0479774	-0.86142	0.294577	-0.298153
EIF5A	Eukaryotic translation initiation factor 5A-1;Eukaryotic translation initiation factor 5A		3	40.8	22.88	620170000	-0.460213	0.144394	1.97134	1.11274	-0.375198	0.492044	0.3703	-0.247292	-0.36681	0.803207	-0.411343	0.616364	-1.41897	-0.83827	-2.10748	1.11377	0.302727	0.210545	-0.105082	-0.295803	0.285114	0.641609	-0.0209846	0.586386	0.649725	-1.26649	-0.794607	1.44098	0.967104	0.687536	NaN	NaN	0.0511379	0.500427	0.494984	-0.642159	0.791655	0.570177	-0.0071907	0.920256	0.510523	0.487604	0.744463
RACK1			18	76.7	323.31	4492000000	2.5439	2.86541	4.02406	3.7331	4.37569	4.57846	2.57768	3.70168	4.62971	1.3253	1.82166	1.81604	NaN	1.1247	-0.114683	1.84364	-0.0757999	0.355259	3.30402	2.16704	2.77607	1.14716	1.23819	1.99682	-1.37188	2.72721	3.92094	3.44874	3.04396	3.74413	-0.537535	1.37148	3.90668	2.25935	2.28143	-0.767426	1.05591	0.745094	-0.550539	2.10764	-1.01211	-0.103937	3.33031
ACTG1	Actin, cytoplasmic 2;Actin, cytoplasmic 2, N-terminally processed		1	74.1	323.31	49803000000	6.323	5.97445	6.85827	6.97239	6.96265	6.59902	6.26136	6.61029	6.57503	6.45015	5.72822	5.95398	5.19034	5.78633	4.43028	6.12031	5.94372	5.10327	6.49495	6.12911	6.18508	6.4731	6.11699	5.84696	6.92561	6.16183	6.72436	6.88149	6.31544	6.69053	6.12929	6.2017	6.9577	7.25496	7.28844	6.37667	7.09911	6.62568	5.31068	6.08121	6.30342	5.96597	7.20366
EEF1A1P5	Putative elongation factor 1-alpha-like 3		12	66.9	323.31	46031000000	5.21899	5.77806	6.411	7.48207	6.97412	7.30548	6.80079	6.64781	7.66457	6.03536	4.66374	5.21123	1.93528	4.25007	3.5679	5.05513	4.50673	3.88967	6.85496	6.04308	6.53271	6.57335	5.52756	5.84352	4.85634	5.5778	6.96024	6.90373	6.70039	7.20253	3.87216	4.76187	5.89977	5.37664	5.45261	4.11036	4.96589	4.83935	3.57412	5.21331	4.70665	3.65109	6.84061
TUBA4A	Tubulin alpha-4A chain		2	54.1	323.31	26656000000	5.04128	5.04906	5.84202	6.65972	6.25128	6.38131	5.72829	5.86873	6.12999	4.77808	3.97014	4.23285	4.2123	5.834	4.63954	4.28206	3.78108	2.8327	5.26179	4.92473	5.10929	4.68273	4.29082	4.19862	5.31357	5.0605	5.87812	6.80886	6.10754	6.06364	4.10287	4.61182	6.06145	6.17317	5.98793	4.94382	5.38635	4.61991	2.96115	4.80864	4.40247	3.87056	7.61833
TUBB4B	Tubulin beta-4B chain		2	68.8	323.31	28757000000	5.46254	5.09025	5.70005	6.30328	6.58477	6.53166	6.25339	6.24264	7.16651	4.35264	3.71118	3.84981	3.1983	3.44632	2.1834	3.20275	2.60305	2.50765	5.36131	4.88328	4.97342	4.41265	3.92097	4.16148	5.30315	4.90119	5.72108	6.53024	5.80457	5.75867	4.21701	4.49652	6.20571	4.62577	4.61806	3.91013	4.97714	3.94244	2.15525	3.97115	3.67803	3.43412	7.32282
PAFAH1B2	Platelet-activating factor acetylhydrolase IB subunit beta		2	12.2	16.818	85452000	NaN	NaN	NaN	NaN	NaN	NaN	NaN	NaN	NaN	NaN	NaN	NaN	NaN	NaN	NaN	NaN	NaN	NaN	NaN	NaN	NaN	NaN	NaN	NaN	NaN	NaN	NaN	0.039526	NaN	NaN	NaN	NaN	NaN	NaN	NaN	NaN	NaN	NaN	NaN	NaN	NaN	NaN	1.24927
HIST3H3	Histone H3.1t		1	18.9	22.434	13022000000	4.74981	4.59524	4.9787	4.1024	4.86548	4.7676	3.97856	4.64941	4.69423	4.24804	4.79479	4.22411	1.25297	3.7587	2.87711	3.87791	4.14482	2.92046	5.03451	5.64078	5.11595	3.97129	4.50414	3.38859	3.83851	4.7666	5.15129	4.55223	4.79283	4.84972	3.90038	3.71821	4.55828	5.09156	4.75037	3.37923	4.84879	5.15129	3.958	4.33747	4.21703	3.09441	4.57807
CCT			3	11.8	22.558	74759000	NaN	-0.781107	-0.418533	-1.12544	-3.45675	-1.73171	-1.44524	NaN	NaN	NaN	NaN	NaN	NaN	NaN	NaN	NaN	NaN	NaN	-2.15954	NaN	NaN	NaN	NaN	NaN	-1.26596	NaN	-1.23372	-1.65056	-2.24741	-1.63512	NaN	NaN	NaN	NaN	-1.56777	NaN	-0.485571	NaN	NaN	-1.48115	-2.33435	NaN	-1.53859
PRKDC	DNA-dependent protein kinase catalytic subunit		2	0.7	11.848	246480000	1.02563	NaN	-0.0257149	NaN	-1.01192	2.24846	NaN	-0.643866	-0.995705	NaN	NaN	NaN	NaN	NaN	NaN	NaN	NaN	NaN	-0.0308418	-0.292519	0.217804	2.75811	NaN	2.80258	NaN	NaN	-0.727699	NaN	NaN	2.23691	NaN	NaN	NaN	NaN	NaN	NaN	NaN	NaN	NaN	NaN	NaN	NaN	NaN
BASP1	Brain acid soluble protein 1	+	32	95.6	323.31	199000000000	-13.3609	-13.5596	-14.4347	-12.5585	NaN	NaN	-13.3189	-12.8106	NaN	-12.6457	-14.4775	NaN	14.7601	13.8455	13.1132	NaN	NaN	-13.8969	NaN	-14.056	NaN	NaN	-13.9177	NaN	NaN	NaN	NaN	-12.8018	NaN	NaN	-13.0135	-13.5192	NaN	NaN	-12.9616	-14.1151	-13.2135	-12.346	NaN	NaN	-12.6256	NaN	NaN
DCD	Dermcidin;Survival-promoting peptide;DCD-1		2	22.7	12.333	321870000	-0.772993	-1.58341	-0.489475	0.0121365	-1.23731	-1.35499	-1.62732	-1.93457	-1.62029	-0.00883675	-1.34488	NaN	-2.03624	-1.2323	NaN	-0.760963	0.0718918	-2.39458	-1.19125	-2.49222	-1.20394	NaN	-1.68011	-1.41443	-0.985981	-1.53853	NaN	NaN	-0.23525	1.37696	0	-0.988056	-1.50194	NaN	-0.62991	1.71903	-0.570375	1.0879	-1.10255	-1.20009	-0.461399	NaN	-1.95835
RPL24	60S ribosomal protein L24		5	38	42.7	1141600000	-0.173836	1.86683	1.57412	1.41334	1.16022	1.53252	0.648975	1.13804	1.96798	0.0890808	2.35177	1.3389	NaN	0.706263	0.440283	NaN	-0.19253	0.593134	1.23348	0.880537	0.653931	-0.113363	1.52577	1.9751	-0.494682	0.650175	1.58287	0.896078	2.00406	0.962608	0.0667591	-0.633677	0.845142	0.811974	0.307568	NaN	-0.115559	0.696537	-0.197271	-1.59774	0.494902	NaN	-2.04169
RPL36A-HNRNPH2			2	32.1	38.901	858970000	-0.0661049	0.0285645	2.00644	-0.868465	1.853	0.588455	-0.76207	1.16525	0.0602608	-0.197098	2.01382	1.75956	-1.68464	2.1299	-0.470493	-0.0764732	-0.479961	-0.535694	0.0948734	1.62216	1.26229	-0.509563	0.932863	0.8148	-1.78771	1.51727	1.25065	-0.910191	1.16789	1.04476	-1.64137	-0.0974903	-0.386917	-0.0497208	-0.575951	-1.47372	-0.61367	0.123173	0.0490417	0.0143204	-1.1893	-1.86029	-1.49511
ARF3	ADP-ribosylation factor 3	+	12	75.1	323.31	20753000000	-1.8321	0.345535	0.619909	1.4655	2.09877	1.83765	8.31481	8.0431	10.1391	-1.26026	-2.8093	-3.14701	NaN	NaN	NaN	-3.02649	-2.13503	NaN	1.95377	0.610298	1.42996	-1.23427	NaN	-2.32025	-2.30584	-0.664379	-0.365767	1.24653	0.495161	1.56433	-5.54618	NaN	-3.71839	-1.50855	-2.90802	NaN	-3.06215	-5.18161	NaN	-4.83783	-2.92957	NaN	1.41643
ARF5	ADP-ribosylation factor 5	+	3	61.1	22.525	123520000	-2.11165	-3.06824	NaN	-1.88829	-1.41434	-1.46507	-1.26578	-1.8267	-0.0854759	NaN	NaN	NaN	NaN	NaN	NaN	NaN	NaN	NaN	-1.1594	-2.15196	-2.23938	-2.61266	-3.45861	NaN	NaN	-1.76358	-1.12088	-2.5731	-2.49487	-1.87419	NaN	-2.12099	-2.28138	NaN	NaN	NaN	NaN	-2.72059	NaN	NaN	NaN	NaN	-1.72741
RHOG	Rho-related GTP-binding protein RhoG		1	15.7	11.178	40674000	NaN	NaN	-3.01615	-2.86984	-2.44014	-2.789	NaN	NaN	-2.60665	NaN	NaN	NaN	NaN	NaN	NaN	NaN	NaN	NaN	NaN	-3.06157	NaN	NaN	NaN	NaN	NaN	NaN	-2.38595	-2.87455	-3.06075	-2.44206	NaN	NaN	NaN	NaN	NaN	NaN	NaN	NaN	NaN	NaN	NaN	NaN	-2.41215
SERF2	Small EDRK-rich factor 2		2	42.2	18.096	1346600000	1.93516	1.78862	-0.309381	0.269749	0.13637	0.209822	2.1921	1.0061	2.03721	1.29364	2.34189	1.07012	1.47303	2.36517	1.66838	-1.75767	NaN	NaN	0.529284	-0.739103	0.710697	0.221102	2.81931	3.16446	2.49717	1.86957	3.12258	0.632687	1.65623	1.42233	1.7411	2.72335	2.43946	3.40779	2.1785	2.02635	1.57961	3.11337	2.4765	1.01444	1.5405	1.2053	NaN
SRSF3	Serine/arginine-rich splicing factor 3		12	67.7	175.54	31636000000	5.85603	5.74027	6.23644	5.49842	5.09549	6.02361	5.83199	4.50704	5.19504	7.33712	6.70501	7.67132	5.3067	5.21995	5.68544	6.91039	6.65532	7.56495	5.07759	3.70778	5.06829	6.75862	6.24839	7.60431	6.76689	5.39542	7.05385	5.90275	5.72287	6.08477	6.07387	5.88874	5.71756	7.17107	6.63769	6.86928	6.44562	6.473	5.94195	7.23439	7.07481	6.81294	5.38636
SLC25A3	Phosphate carrier protein, mitochondrial		3	11.4	24.695	567570000	-0.730742	-1.0913	0.336329	1.50963	1.87261	0.198198	-1.64061	-1.07864	0.14113	-0.335186	-0.994518	-1.10131	NaN	NaN	NaN	NaN	NaN	NaN	1.08752	-0.663315	0.410248	-0.543148	0.168001	-2.24386	NaN	1.35041	-0.181107	-0.849508	-0.296684	-0.185703	NaN	-1.69261	-1.32088	-1.58317	-0.947584	NaN	NaN	NaN	NaN	NaN	-1.90432	NaN	-0.591644
CLTC	Clathrin heavy chain 1;Clathrin heavy chain		23	19.4	254.52	1402100000	0.360668	-0.174725	0.591259	4.58046	3.02282	2.72647	1.29887	1.43865	1.83242	0.321861	-1.31667	-2.0528	NaN	-1.49129	NaN	-1.95181	-2.33517	NaN	3.6742	-1.12943	1.71616	-0.460085	-0.845474	-0.794483	-2.01758	-1.97177	0.536942	1.82222	0.431772	1.35731	NaN	-0.918427	-0.310438	-0.60655	-1.51303	NaN	-1.57917	-1.51319	NaN	-1.59786	NaN	-1.36618	0.390551
HNRNPU	Heterogeneous nuclear ribonucleoprotein U		26	34.5	323.31	8957600000	3.22225	4.44577	4.94527	4.44299	5.24222	4.75349	3.75632	4.34404	4.48213	2.38018	3.08401	3.22824	NaN	1.52308	-0.418703	1.66283	2.17898	1.43029	4.22604	4.18502	4.50484	2.64085	3.29042	2.24883	1.00731	3.75984	4.95805	3.59686	4.2302	4.52161	1.74503	3.06273	4.34607	3.09761	3.10976	1.06577	2.15069	2.07825	2.30829	1.76907	2.56372	0.427299	3.29908
SPTBN1	Spectrin beta chain, non-erythrocytic 1		2	1.4	12.598	85296000	NaN	-0.656748	NaN	NaN	-2.35219	NaN	NaN	NaN	-1.67993	-1.05017	-0.631117	NaN	NaN	-1.23422	NaN	NaN	NaN	-1.56642	NaN	NaN	-1.50484	-1.18757	-0.640549	NaN	NaN	NaN	-1.30323	NaN	-1.43451	NaN	NaN	-1.73129	NaN	-1.54359	NaN	NaN	NaN	NaN	NaN	NaN	NaN	NaN	NaN
SRSF2	Serine/arginine-rich splicing factor 2		4	40.8	106.8	2437600000	1.76969	3.79116	2.13248	-0.182585	1.25018	2.62652	1.69648	0.714609	2.0746	2.38257	3.68947	4.21923	1.42302	2.19274	3.1846	2.25814	1.53524	3.61938	1.82946	1.18308	2.23246	1.38039	3.04417	4.80845	1.49246	0.731886	2.18876	1.0388	3.0009	1.39329	2.19963	1.41059	2.79625	4.10809	1.78868	1.44394	2.82772	3.48448	2.81114	3.47439	2.02649	1.64693	0.769464
CAP1	Adenylyl cyclase-associated protein 1;Adenylyl cyclase-associated protein;Adenylyl cyclase-associated protein;Adenylyl cyclase-associated protein;Adenylyl cyclase-associated protein;Adenylyl cyclase-associated protein;Adenylyl cyclase-associated protein;Adenylyl cyclase-associated protein;Adenylyl cyclase-associated protein;Adenylyl cyclase-associated protein;Adenylyl cyclase-associated protein;A…		14	39.8	102.11	842990000	0.300428	-0.450626	0.691507	0.322901	3.00361	1.09743	-0.177401	1.32338	1.18642	-0.355831	-1.21836	-1.52578	NaN	NaN	NaN	-1.41863	NaN	NaN	0.949326	-1.4017	0.362492	-1.53989	-2.43237	-0.515673	-2.08133	-0.473803	0.521887	0.218704	1.32651	1.02147	NaN	-1.59477	0.615932	-1.14307	-0.469818	-1.80424	NaN	NaN	NaN	NaN	-1.0993	NaN	-0.870749
HMGCS1	Hydroxymethylglutaryl-CoA synthase, cytoplasmic		5	14	59.815	420930000	-0.396519	NaN	-0.407553	1.49581	1.41128	0.992283	1.06305	0.0194664	2.13277	-1.56473	NaN	NaN	NaN	NaN	NaN	NaN	NaN	NaN	-0.548441	-1.12057	-1.10187	-0.485977	-1.30521	-1.7522	NaN	NaN	0.0121536	-0.407434	-0.104124	-0.659437	NaN	NaN	0.492384	NaN	-0.726608	NaN	-0.322563	NaN	NaN	NaN	NaN	NaN	1.52668
AKAP17A	A-kinase anchor protein 17A		7	12.8	67.345	652460000	NaN	-1.04639	-0.77669	-0.863794	-0.0216045	-1.4169	NaN	0.999424	-1.43137	0.240269	2.4104	0.788681	NaN	0.430815	-0.956839	0.404903	1.88778	0.113691	-1.0639	2.39015	0.458588	1.40365	2.08324	0.664745	0.520218	1.66918	0.301586	-1.18023	-0.00752831	-0.307421	-0.500917	NaN	-0.904175	NaN	0.222548	0.315128	0.902945	NaN	0.349121	NaN	1.06462	1.30742	-0.969608
RPL1			6	46.1	78.181	668180000	-0.256039	0.359665	1.18734	-0.307383	1.4398	2.0729	-0.57971	1.22453	0.877264	NaN	-1.16847	NaN	NaN	-0.950953	NaN	NaN	-1.41716	NaN	0.705282	0.619017	0.815952	-1.90216	-0.569065	-3.36686	NaN	-0.0841389	1.0396	-0.78429	0.819508	1.53149	NaN	-0.619648	-0.557722	-1.97361	-1.08187	NaN	-2.17603	-0.998322	-0.959482	-1.32239	NaN	NaN	NaN
FKBP4	Peptidyl-prolyl cis-trans isomerase FKBP4;Peptidyl-prolyl cis-trans isomerase FKBP4, N-terminally processed;Peptidyl-prolyl cis-trans isomerase		3	8.1	20.322	151120000	-0.537947	-1.49631	-0.630976	-0.909828	-1.986	-1.38965	-0.958456	-1.32045	-0.354067	NaN	-2.18134	NaN	NaN	NaN	NaN	NaN	NaN	NaN	0.275702	-1.72568	-1.42636	-1.79716	NaN	-2.34879	NaN	NaN	-1.14529	-0.546883	NaN	-1.07955	NaN	NaN	-0.980463	-0.934208	-0.938786	-1.84873	-0.771454	NaN	NaN	NaN	NaN	NaN	0.162802
RPL6	60S ribosomal protein L6;60S ribosomal protein L6;60S ribosomal protein L6;60S ribosomal protein L6		14	49.7	120.42	3732800000	0.823713	2.97064	2.83712	2.84204	3.62541	3.081	1.25336	3.0086	3.51661	0.384666	1.66062	2.08457	NaN	1.05027	-0.0811386	0.156364	0.114857	-0.238834	3.31367	4.1313	4.17926	0.863544	1.22931	1.30551	-0.795265	2.00719	3.63817	1.51138	3.72856	3.79294	-2.18619	0.68037	0.736904	1.96336	0.51911	-1.49901	-0.977983	-0.198286	0.690453	0.00401115	0.0544739	0.109585	-0.537128
SLC25A11	Mitochondrial 2-oxoglutarate/malate carrier protein		3	16	48.956	190090000	-0.251896	-1.09768	-0.952805	-1.40429	-0.26689	-0.908205	-1.58416	-0.488327	-0.986031	NaN	-3.17881	-3.30887	NaN	NaN	NaN	NaN	NaN	NaN	-0.951359	-2.15287	-1.66245	-2.12186	-1.39919	NaN	NaN	-0.154266	-0.29917	-1.63041	-0.94836	-1.41932	NaN	-2.1532	NaN	-3.12523	-1.87744	NaN	NaN	NaN	-2.58328	NaN	NaN	NaN	-3.15656
GLO1	Lactoylglutathione lyase;Lactoylglutathione lyase		4	31.4	26.833	557030000	-0.727543	-1.28578	-0.258242	2.61013	0.177298	1.74735	-0.616539	-0.83717	0.727949	-1.07033	-1.26662	-1.45367	-2.82611	NaN	NaN	-0.791197	-2.07111	-1.85301	-0.666981	-1.63916	-1.39876	-1.38795	-1.87927	-1.45503	-0.854492	-1.47304	-0.213001	0.0754471	-0.202854	-0.60885	NaN	-1.86166	0.0690861	-1.1949	-1.63847	-1.57351	-1.40027	-1.92102	NaN	-1.1674	-1.3702	-1.18819	3.06994
YWHAH	14-3-3 protein eta		2	12.6	12.409	47989000	NaN	NaN	NaN	-0.284586	-1.47737	-1.54644	NaN	NaN	-2.17814	NaN	NaN	NaN	NaN	NaN	NaN	NaN	NaN	NaN	-1.87079	NaN	NaN	NaN	NaN	NaN	NaN	NaN	NaN	NaN	NaN	NaN	NaN	NaN	NaN	NaN	NaN	NaN	NaN	NaN	NaN	NaN	NaN	NaN	-1.70271
PLP2	Proteolipid protein 2		1	8.6	14.256	82722000	-2.58094	NaN	NaN	-0.751579	-1.63615	-2.48934	-2.37743	-2.21243	-2.20882	NaN	NaN	NaN	NaN	NaN	NaN	NaN	NaN	NaN	-1.1023	-3.11294	-2.29141	-1.9791	-1.80392	NaN	NaN	NaN	NaN	-1.95012	-2.94171	-2.33615	NaN	NaN	NaN	NaN	NaN	NaN	NaN	NaN	NaN	NaN	NaN	NaN	-1.87477
CSTF1	Cleavage stimulation factor subunit 1		1	6.1	9.6324	27883000	NaN	NaN	NaN	NaN	-1.40586	NaN	NaN	NaN	NaN	NaN	NaN	NaN	NaN	NaN	NaN	NaN	NaN	NaN	NaN	NaN	NaN	NaN	NaN	NaN	NaN	NaN	NaN	-2.79193	-2.65101	NaN	NaN	NaN	NaN	NaN	NaN	NaN	NaN	NaN	NaN	NaN	NaN	NaN	NaN
SRSF11	Serine/arginine-rich splicing factor 11		9	20.7	175.41	4772200000	2.43005	3.74975	3.79692	2.10133	2.76924	3.13925	3.17686	2.51839	1.93585	3.89329	4.44547	4.08825	2.22466	3.12209	3.04075	3.81908	3.7142	3.39362	2.52988	3.3637	3.47175	3.38802	3.82073	4.67314	3.51678	2.81254	2.46142	2.99133	3.57975	2.9348	3.98523	3.02799	2.80765	3.44876	3.54641	3.08517	3.80531	4.29973	3.69004	3.23498	3.69285	3.29669	1.76233
EEF1A2	Elongation factor 1-alpha 2		1	28.3	8.799	104650000	NaN	NaN	NaN	0.969608	NaN	0.662138	NaN	NaN	-0.403284	NaN	NaN	NaN	NaN	NaN	NaN	NaN	NaN	NaN	NaN	NaN	NaN	NaN	NaN	NaN	NaN	NaN	-1.19137	NaN	NaN	0.543325	NaN	NaN	NaN	NaN	NaN	NaN	NaN	NaN	NaN	NaN	NaN	NaN	-0.962795
GFPT1	Glutamine--fructose-6-phosphate aminotransferase [isomerizing] 1		3	6.6	21.939	62656000	NaN	NaN	-2.73585	-2.04945	-0.436708	-1.78784	-2.29223	NaN	-0.932098	NaN	NaN	NaN	NaN	NaN	NaN	NaN	NaN	NaN	-2.64416	NaN	-3.12929	NaN	NaN	NaN	NaN	NaN	-2.00929	-2.18793	NaN	NaN	NaN	NaN	NaN	NaN	NaN	NaN	NaN	NaN	NaN	NaN	NaN	NaN	-2.53667
PRDX1	Peroxiredoxin-1		11	71.9	172.89	7607300000	2.84435	2.95053	3.6711	4.5322	4.07151	4.53344	4.31417	3.62997	4.72954	3.53856	1.67569	3.62575	1.98352	1.48792	0.79681	3.72032	2.83318	2.64707	3.97242	3.33389	3.9618	3.71527	2.86219	3.5454	4.02467	2.92955	3.84312	4.65765	3.87147	4.36773	3.94704	3.14317	3.76506	3.50831	3.11251	3.30898	4.011	3.36291	2.04778	3.41205	3.76376	3.85133	5.08549
RPL18	60S ribosomal protein L18;60S ribosomal protein L18;60S ribosomal protein L18;60S ribosomal protein L18;60S ribosomal protein L18;60S ribosomal protein L18;60S ribosomal protein L18;60S ribosomal protein L18		7	49.7	54.44	1158700000	0.948595	0.251846	-0.000282288	0.896473	1.50024	-0.137318	1.13028	2.35518	1.83732	-0.0617027	-0.951494	NaN	NaN	0.0389996	NaN	-0.646456	-0.381908	NaN	1.97709	1.3666	1.0822	0.961737	-0.500959	-0.813702	-0.434238	1.5744	1.17233	0.901873	0.985537	1.30385	NaN	-0.244843	0.646574	0.241016	-0.0019207	NaN	-1.32121	0.718613	-0.0232887	NaN	NaN	NaN	0.872347
CKAP4	Cytoskeleton-associated protein 4		2	4.7	11.566	50625000	-2.57555	-2.8662	NaN	NaN	NaN	NaN	NaN	NaN	NaN	-2.20718	-3.0691	NaN	NaN	NaN	NaN	NaN	-2.49854	NaN	-2.83877	-3.76303	-3.30311	-1.92513	-2.9129	NaN	0	NaN	-2.18637	NaN	-3.39671	-3.15659	NaN	NaN	NaN	-0.479355	-0.274887	-1.24948	-2.04389	-2.56295	NaN	NaN	-3.38666	-2.1988	-2.86906
KHDRBS1	KH domain-containing, RNA-binding, signal transduction-associated protein 1		2	6	13.09	155510000	-1.90432	-2.35571	-2.3227	-1.58685	-2.12679	-2.28276	-1.66356	-2.7638	-2.17306	-2.10877	NaN	NaN	NaN	NaN	NaN	-2.06048	-2.49546	-2.58436	-2.02439	-2.75743	-3.12359	-1.97167	-2.43255	-2.33322	-2.8745	-2.13738	0.191252	-2.66972	-2.80463	-1.51206	-3.52481	-2.49166	-1.99668	-1.70754	-1.31663	-1.22523	-0.406973	-2.18105	-2.24971	-1.74421	-2.2597	-2.5155	-1.53661
SOS1	Son of sevenless homolog 1		1	1.2	7.0013	245030000	-0.744904	NaN	0.213314	-0.420015	-0.753347	-0.778231	-0.326939	NaN	-0.60898	0.879232	0.610357	0.715376	-0.859262	-0.313061	NaN	1.15419	0.17894	0.565468	NaN	NaN	NaN	0.0165157	0.212154	1.05909	0.61504	-0.262859	-0.883339	NaN	0.215017	NaN	NaN	0.502298	NaN	0.363491	0.798201	0.305519	0.440575	NaN	NaN	NaN	NaN	NaN	-0.71542
SRSF1	Serine/arginine-rich splicing factor 1		16	55.2	213.96	5428400000	3.93692	4.75615	3.44898	2.86879	2.82153	3.55606	2.97743	1.25772	2.75178	4.16042	4.92057	4.89992	2.47384	3.45802	3.03108	4.04724	3.05579	4.74817	3.22952	0.955751	2.972	3.59286	4.30615	5.80639	4.25532	1.43536	4.10158	3.33109	3.63378	2.78542	2.24394	2.62008	2.95622	4.97858	3.62181	4.23491	3.67561	3.948	3.34169	4.52049	3.1596	3.86552	2.18785
DHX9	ATP-dependent RNA helicase A		26	25.7	270.11	4872700000	2.85872	3.01988	4.50427	2.80203	4.18821	3.58543	1.6212	3.35351	4.19174	1.38214	1.32955	3.71345	4.34024	4.81736	1.72848	4.60037	-0.608528	-1.62377	4.1024	1.86923	4.12057	1.83114	1.29396	0.799839	3.9793	3.52739	2.43491	2.9311	4.12537	2.7385	4.49831	5.39569	4.18336	2.80697	1.14135	3.56035	0.309553	0.0346203	3.04911	4.10662	-0.671928	2.81122	2.80108
LG3BP			2	5.8	12.017	24755000	NaN	NaN	NaN	NaN	-2.3703	-1.44864	NaN	NaN	NaN	NaN	NaN	NaN	NaN	NaN	NaN	NaN	NaN	NaN	NaN	NaN	NaN	NaN	NaN	NaN	NaN	NaN	NaN	NaN	NaN	NaN	NaN	NaN	NaN	NaN	NaN	NaN	NaN	NaN	NaN	NaN	NaN	NaN	NaN
SSRP1	FACT complex subunit SSRP1		10	17.9	87.627	817800000	-0.658512	-0.528578	NaN	0.872675	1.27355	0.975868	1.05615	0.963915	1.38464	-1.46887	2.33497	-0.258759	NaN	NaN	NaN	-0.310783	-0.265482	-1.54899	0.888639	-0.592482	0.832363	-1.59475	2.15255	-0.387835	0.746029	-0.828676	0.258068	0.996283	0.909458	-0.237904	NaN	NaN	0.8943	-1.28456	-1.63803	-0.648344	NaN	NaN	NaN	-0.567415	-1.19761	-0.753826	3.52885
NSUN2	tRNA (cytosine(34)-C(5))-methyltransferase		5	9.6	30.276	149840000	NaN	NaN	-3.15888	-1.53208	-0.547722	-1.00508	-0.230631	-0.576542	0.838144	-1.9654	NaN	NaN	NaN	NaN	NaN	NaN	NaN	NaN	NaN	NaN	NaN	NaN	NaN	NaN	NaN	NaN	-0.936495	-1.70988	-1.10888	-1.06602	NaN	NaN	-1.87404	NaN	NaN	NaN	NaN	NaN	NaN	NaN	NaN	NaN	0.254333
RBBP4	Histone-binding protein RBBP4		2	16.6	43.502	293290000	-0.665613	-0.0586548	0.158234	0.245644	-0.0788116	0.304506	-0.628168	-0.0139008	0.154228	NaN	NaN	-1.37302	NaN	NaN	NaN	-1.73747	-1.21912	NaN	-0.386774	-1.27093	-0.95957	-1.20721	-2.16729	NaN	-1.3175	-0.633383	-0.80603	-0.340611	-1.05101	-0.935186	NaN	-1.08847	0.44577	-1.04781	-1.00821	-1.55836	NaN	NaN	NaN	-1.07972	NaN	-2.82132	0.216616
ST3GAL3	CMP-N-acetylneuraminate-beta-1,4-galactoside alpha-2,3-sialyltransferase		1	9.1	7.0152	1286700000	0.439281	1.12247	1.8809	1.32338	1.13392	0.418962	1.08357	0.621698	-0.275423	2.07101	1.98873	2.74568	-0.19803	0.824823	-0.464642	3.02503	2.13541	1.83929	0.908604	1.02033	0.971144	2.01534	1.94748	1.86745	2.77747	1.71813	1.39907	1.45905	1.65517	1.42018	1.96554	1.19942	0.235588	2.67594	2.32131	2.03046	1.28235	1.10198	0.0395164	2.11539	3.31628	2.23858	1.32918
TWF1	Twinfilin-1		1	30.5	8.0701	21480000	NaN	NaN	NaN	-1.29976	-2.23105	-1.65062	NaN	NaN	NaN	NaN	NaN	NaN	NaN	NaN	NaN	NaN	NaN	NaN	NaN	NaN	NaN	NaN	NaN	NaN	NaN	NaN	NaN	-1.95317	NaN	-1.26117	NaN	NaN	NaN	NaN	NaN	NaN	NaN	NaN	NaN	NaN	NaN	NaN	NaN
AIM			2	10.3	15.087	62279000	NaN	NaN	NaN	-1.81588	NaN	NaN	NaN	NaN	-2.22104	NaN	NaN	NaN	NaN	NaN	NaN	NaN	NaN	NaN	NaN	NaN	NaN	NaN	NaN	NaN	NaN	-1.76975	NaN	NaN	-1.94854	-1.99272	NaN	NaN	NaN	NaN	NaN	NaN	NaN	NaN	NaN	NaN	NaN	NaN	0.268494
ILF3	Interleukin enhancer-binding factor 3		4	4.6	24.521	611870000	-0.687437	-0.817793	-1.44716	-0.685991	0.801716	-0.990355	-0.339409	-1.17732	-2.32744	1.76627	2.29748	-0.502653	NaN	-0.160572	NaN	0.466759	0.320271	-0.378349	0.984428	0.386353	-1.55173	0.682896	0.835798	0.256903	-0.626526	-0.0271626	0.0575504	-0.851725	1.08537	-0.233179	-1.17867	-0.871864	-1.69624	1.66182	0.325394	2.49359	-0.258738	-0.586775	0.0503197	NaN	2.2459	0.809477	-1.04823
LMAN2	Vesicular integral-membrane protein VIP36		3	9.8	19.064	143680000	-2.01942	-1.86218	-1.18886	-1.36065	-0.596653	-0.466433	-2.31712	-1.67311	-0.942598	NaN	NaN	NaN	NaN	NaN	NaN	NaN	NaN	NaN	-1.76008	-2.07162	NaN	NaN	NaN	NaN	NaN	-2.22497	-0.964912	-1.14424	-1.11657	-1.49227	NaN	NaN	-1.01875	-1.65166	NaN	NaN	NaN	NaN	NaN	NaN	NaN	NaN	-0.522543
TRAP1	Heat shock protein 75 kDa, mitochondrial		11	20	81.986	443780000	1.11567	0.500919	-1.10647	0.245821	1.97129	0.815536	-0.785765	-0.028141	0.111164	-1.70331	NaN	NaN	NaN	NaN	NaN	NaN	NaN	-0.824299	-1.07867	-1.46053	-1.00449	-1.15775	-0.808365	NaN	-1.76788	NaN	-0.163876	-0.0538139	-0.49114	-0.48336	NaN	-0.50886	0.794973	NaN	NaN	NaN	NaN	NaN	NaN	NaN	NaN	NaN	1.61855
PPP1R8	Nuclear inhibitor of protein phosphatase 1;Activator of RNA decay		1	8.3	8.3184	19664000	NaN	NaN	NaN	NaN	-3.05458	-2.3382	NaN	NaN	NaN	NaN	NaN	NaN	NaN	NaN	NaN	NaN	NaN	NaN	NaN	NaN	NaN	NaN	NaN	NaN	NaN	NaN	-2.34045	NaN	NaN	NaN	NaN	NaN	NaN	NaN	NaN	NaN	NaN	NaN	NaN	NaN	NaN	NaN	NaN
ECH1	Delta(3,5)-Delta(2,4)-dienoyl-CoA isomerase, mitochondrial		1	4.1	6.4311	26315000	NaN	NaN	NaN	-2.66241	-1.81776	-2.6782	NaN	NaN	-2.94791	NaN	NaN	NaN	NaN	NaN	NaN	NaN	NaN	NaN	NaN	NaN	NaN	NaN	NaN	NaN	NaN	NaN	NaN	-2.87372	NaN	-2.82892	NaN	NaN	NaN	NaN	NaN	NaN	NaN	NaN	NaN	NaN	NaN	NaN	-2.44182
ACACA	Acetyl-CoA carboxylase 1;Biotin carboxylase		4	2.2	27.123	110020000	-2.17059	-2.91546	NaN	NaN	NaN	NaN	-2.3566	-2.54811	-2.64111	NaN	-0.0742168	NaN	NaN	-1.70898	NaN	NaN	NaN	NaN	-2.60523	1.22436	-2.52091	NaN	-0.421221	NaN	NaN	NaN	NaN	NaN	NaN	NaN	NaN	NaN	NaN	-1.45158	NaN	NaN	NaN	NaN	NaN	NaN	NaN	NaN	NaN
CHAF1B	Chromatin assembly factor 1 subunit B		3	6.6	18.582	42748000	NaN	NaN	NaN	-2.42399	-3.13046	-2.81101	-2.48993	-2.47628	-1.30291	NaN	NaN	NaN	NaN	NaN	NaN	NaN	NaN	NaN	-2.72701	-3.31874	-3.30025	NaN	NaN	NaN	NaN	NaN	NaN	NaN	NaN	NaN	NaN	NaN	NaN	NaN	NaN	NaN	NaN	NaN	NaN	NaN	NaN	NaN	NaN
MTAP	S-methyl-5'-thioadenosine phosphorylase;S-methyl-5'-thioadenosine phosphorylase;S-methyl-5'-thioadenosine phosphorylase;Purine nucleoside phosphorylase;Purine nucleoside phosphorylase		3	17.9	19.473	134150000	NaN	NaN	NaN	NaN	-0.939833	-1.42327	-1.35172	-1.56804	-0.445784	NaN	NaN	-2.24605	NaN	NaN	NaN	NaN	NaN	NaN	-1.46835	-2.07055	-2.47663	NaN	NaN	NaN	NaN	-1.79007	-1.1762	-1.10748	-1.25046	-0.942562	NaN	NaN	-1.19145	NaN	NaN	NaN	NaN	NaN	NaN	NaN	NaN	NaN	-0.886778
TARDBP	TAR DNA-binding protein 43		8	39.9	97.018	517380000	-0.220579	-0.689991	-0.78038	-0.0620384	1.72378	0.927586	-0.420763	0.380249	1.2773	-1.46889	-1.58433	-1.6876	NaN	NaN	NaN	-1.14171	-2.65209	NaN	-0.470589	-0.368908	-1.71387	NaN	-1.81504	-1.56674	-2.56313	-0.228514	0.46637	0.0237446	0.551903	0.790054	NaN	-1.89057	-0.294296	-0.65262	-0.841345	NaN	-1.68307	NaN	NaN	-2.31729	-3.07536	NaN	1.23008
HNRNPA0	Heterogeneous nuclear ribonucleoprotein A0		13	51.8	234.75	2607200000	1.84254	1.50407	1.25504	1.96557	3.15472	2.50793	2.9043	2.61073	3.72168	0.743643	1.47549	1.17836	-1.07369	0.180525	-2.3052	-0.188877	-0.217257	-0.167847	1.72074	1.83161	0.933548	0.976177	1.5689	0.0516376	1.09195	2.37128	3.53593	2.33211	2.85815	3.50165	-0.0400772	1.47414	2.05886	1.65013	1.26834	0.0525036	0.412987	0.704422	0.0853825	0.907845	0.682705	1.41878	3.36507
PRDX4	Peroxiredoxin-4		6	44.3	52.898	696930000	-0.557697	-0.293833	0.347927	1.00493	1.70402	1.11918	0.163363	0.369078	0.708818	-0.073637	-0.861994	-0.812965	NaN	-0.72855	NaN	-0.113134	-0.526743	-1.3949	0.445528	0.537987	0.226475	-0.0398026	-0.224199	-0.368183	-0.0652294	-0.542995	0.182711	0.286528	0.347538	0.262522	0.0922928	NaN	-0.197779	-0.661858	0.165319	0.128929	0.177229	-1.09418	NaN	NaN	0.251972	-0.381845	1.34218
CBX3	Chromobox protein homolog 3		6	47	94.945	423330000	NaN	1.42624	-1.09943	-2.12738	-0.191149	-0.873629	-1.94887	-2.14597	-1.21778	NaN	2.11708	0.220444	NaN	-1.68632	NaN	NaN	-1.05575	-0.245262	-1.33699	-3.79212	-2.65587	NaN	0.767029	0.229822	-1.36615	-2.05058	-0.479094	NaN	0.962627	-1.16867	NaN	NaN	-1.16024	1.97734	-1.34677	-0.777042	-2.35828	-0.137291	-3.28794	-0.554333	0.0386658	-1.15012	-1.53865
PSMD2	26S proteasome non-ATPase regulatory subunit 2		3	5.1	20.05	153460000	-1.28308	NaN	-2.67566	0.130674	-1.16452	-0.80715	-0.0246449	-1.77173	-0.303144	NaN	NaN	-2.56636	NaN	NaN	NaN	NaN	NaN	NaN	-0.819939	-3.06837	-2.2008	-1.23271	-1.82463	NaN	NaN	-1.45486	NaN	NaN	-1.5714	-0.570959	NaN	NaN	-0.811241	NaN	-1.03435	NaN	-1.99472	-2.80345	NaN	-2.76399	NaN	-2.04071	0.313173
SRSF6	Serine/arginine-rich splicing factor 6		4	13.4	27.936	652950000	0.152473	1.01209	NaN	0.0964966	0.00909805	0.00630188	0.272114	0.529667	-0.414013	0.106316	0.74457	0.158226	-1.66911	-0.591503	-1.74426	-0.32095	-0.245346	0.521523	0.747946	1.63919	0.872561	-0.806473	1.48851	0.449575	0.174557	0.349838	0.695017	0.617044	NaN	0.819414	-2.1555	-1.01801	0.202982	1.78235	0.228104	-0.396709	0.678267	-0.43305	-0.981686	0.0972195	-0.199936	NaN	1.16523
TRIM28	Transcription intermediary factor 1-beta		1	4.1	45.409	91726000	-1.37909	-1.27036	-0.976902	-1.24717	NaN	-1.5992	-1.26665	NaN	-1.6625	-1.10359	NaN	NaN	NaN	NaN	NaN	NaN	NaN	NaN	-1.08434	-1.32338	NaN	-1.16264	NaN	NaN	-1.38543	-1.6755	-1.61466	NaN	-1.98033	NaN	NaN	NaN	NaN	-1.65375	-0.818054	-1.35159	NaN	NaN	NaN	-1.41284	-1.38898	-1.24542	NaN
PABPC4	Polyadenylate-binding protein 4;Polyadenylate-binding protein;Polyadenylate-binding protein;Polyadenylate-binding protein		2	11.9	14.384	42497000	NaN	NaN	NaN	NaN	-1.92529	NaN	NaN	NaN	NaN	NaN	NaN	NaN	NaN	NaN	NaN	NaN	NaN	NaN	NaN	NaN	NaN	NaN	NaN	NaN	NaN	NaN	NaN	NaN	NaN	NaN	NaN	NaN	NaN	NaN	NaN	NaN	NaN	NaN	NaN	NaN	NaN	NaN	NaN
EIF3I	Eukaryotic translation initiation factor 3 subunit I;Eukaryotic translation initiation factor 3 subunit I		9	42.2	157.42	891830000	-0.142075	-0.778378	0.801645	0.693523	2.57738	1.59525	0.120922	0.121452	1.77005	NaN	-0.217358	-0.887741	NaN	-1.52208	NaN	NaN	NaN	NaN	0.580547	-0.120144	-0.114378	-0.522562	NaN	NaN	-0.763121	1.30822	0.867798	0.999949	0.70665	0.938318	NaN	0.171013	1.26518	-0.260574	NaN	NaN	-0.969675	NaN	NaN	NaN	NaN	NaN	0.907789
DYNC1I2	Cytoplasmic dynein 1 intermediate chain 2		2	30	13.6	77640000	-2.29547	NaN	-2.73574	-1.77482	-2.69677	-1.93283	-2.09903	-2.04594	-1.83821	NaN	NaN	NaN	NaN	NaN	NaN	NaN	NaN	NaN	-1.05783	NaN	NaN	NaN	NaN	NaN	NaN	NaN	-2.00903	NaN	-3.58513	-1.57994	NaN	-2.128	-1.12767	NaN	NaN	NaN	NaN	NaN	NaN	NaN	NaN	NaN	-2.44614
PPIG	Peptidyl-prolyl cis-trans isomerase G;Peptidyl-prolyl cis-trans isomerase;Peptidyl-prolyl cis-trans isomerase		8	21.3	66.347	573520000	NaN	NaN	-4.32436	NaN	-2.2243	-4.85835	-3.0452	NaN	-4.30338	-2.46126	-0.842575	-0.969395	NaN	NaN	NaN	NaN	-4.6775	-1.83852	2.40293	3.45372	3.45904	NaN	-1.05351	-0.996586	-2.58727	-4.24455	-4.56768	-3.10182	-1.48993	-3.27398	-2.26651	NaN	NaN	-1.12663	-3.7894	-3.3487	NaN	-3.65392	NaN	NaN	-1.94373	-1.37166	-2.00609
TCOF1	Treacle protein		2	1.7	13.803	105500000	-4.32962	-1.69247	-3.05484	NaN	-3.26339	-3.14774	-1.37194	-2.54272	-3.45357	-2.07955	-0.192907	-1.53642	-4.04648	-0.68292	NaN	-2.6908	-2.06888	-1.4815	-2.04379	-2.86718	-2.42101	-1.77509	-0.296862	-1.82892	-2.0225	-1.42728	NaN	NaN	-2.31316	-2.31286	-2.19568	NaN	NaN	-1.55816	-1.49552	-0.670765	-1.86072	-1.39073	-1.33642	NaN	-2.0556	-0.558895	-2.8412
PRPF4B	Serine/threonine-protein kinase PRP4 homolog		3	3.5	18.667	141500000	-1.39398	NaN	0.076252	-2.67117	-3.0443	NaN	-0.244019	NaN	NaN	-0.830418	-0.687773	-1.46079	-1.40178	NaN	-2.38593	NaN	-1.79795	-1.76622	NaN	-0.395203	0.817429	-1.5312	-1.40344	-1.16751	NaN	NaN	NaN	NaN	-2.33183	-2.1128	NaN	NaN	NaN	-2.35554	-1.58528	-1.35647	0.0122967	NaN	NaN	-2.46494	-1.6615	-0.392302	-2.11661
HDAC1	Histone deacetylase 1;Histone deacetylase;Histone deacetylase		2	11.8	10.644	76395000	-1.92018	-2.05235	NaN	-1.81449	-1.13509	-1.64603	-2.11996	-1.90208	-1.75287	NaN	NaN	NaN	NaN	NaN	NaN	NaN	NaN	NaN	-1.96296	NaN	NaN	NaN	NaN	NaN	NaN	NaN	NaN	-1.58747	NaN	-1.95468	NaN	NaN	NaN	NaN	NaN	NaN	NaN	NaN	NaN	NaN	NaN	NaN	-2.17155
TRA2A	Transformer-2 protein homolog alpha		9	64.4	87.866	1032000000	-2.77215	-1.46681	-1.5741	-2.29755	-0.476675	-0.941442	-3.72998	-2.20264	-0.883595	NaN	-4.20707	-3.14895	NaN	-3.95426	NaN	NaN	NaN	-4.40664	0.190674	4.98941	2.71798	NaN	-2.29388	NaN	NaN	-3.02125	-1.0854	-3.92885	-2.47026	-1.51901	NaN	NaN	-2.3626	-4.17581	-4.17659	-4.90978	NaN	-3.92535	-4.86376	-4.78763	-5.22443	NaN	-1.24407
KRR1	KRR1 small subunit processome component homolog		1	4.9	6.8136	46762000	NaN	NaN	NaN	NaN	-2.52741	NaN	NaN	NaN	NaN	-2.36179	-1.55909	NaN	NaN	NaN	NaN	NaN	NaN	-2.19298	NaN	-2.33788	NaN	NaN	0.196495	-1.78072	NaN	NaN	NaN	NaN	-2.13383	NaN	NaN	NaN	NaN	-1.79981	-1.85042	NaN	NaN	NaN	NaN	NaN	-1.87292	NaN	NaN
FHL1	Four and a half LIM domains protein 1		3	13.9	18.722	152270000	-0.697184	NaN	-0.907993	-0.627451	-1.08388	-0.349867	-1.11339	-1.01395	-1.24901	NaN	NaN	NaN	NaN	NaN	NaN	NaN	-1.24975	NaN	NaN	NaN	NaN	NaN	-0.759253	-1.45361	NaN	NaN	-1.40866	-0.590092	-1.02339	-0.600241	NaN	NaN	-1.02387	-0.054388	-0.473108	NaN	NaN	NaN	NaN	0.373749	-0.568939	NaN	-0.580561
DDX39B	Spliceosome RNA helicase DDX39B		6	41.4	249.31	2870900000	1.44186	1.8955	2.69484	5.17369	3.49949	3.16087	2.00878	2.64951	3.22568	0.728582	-0.622654	-0.0836201	-2.46452	-0.356207	NaN	-0.391495	-1.27982	-1.6462	2.85454	1.3965	2.36658	2.97578	2.02513	2.58165	-0.581045	2.05379	2.58508	3.46877	2.84669	2.68181	-0.293022	0.732683	3.27335	-0.785807	0.766111	-0.914314	0.439487	-0.470078	-0.426945	NaN	-0.186394	-0.564722	4.14173
TUBB2A	Tubulin beta-2A chain		2	64.5	11.467	20917000	NaN	NaN	NaN	NaN	NaN	-2.4822	NaN	NaN	-1.11522	NaN	NaN	NaN	NaN	NaN	NaN	NaN	NaN	NaN	-2.88799	NaN	NaN	NaN	NaN	NaN	NaN	NaN	NaN	NaN	-2.5426	NaN	NaN	NaN	NaN	NaN	NaN	NaN	NaN	NaN	NaN	NaN	NaN	NaN	-1.99841
IDI1	Isopentenyl-diphosphate Delta-isomerase 1		2	18.9	19.011	114910000	NaN	-2.06214	NaN	-0.5075	-0.83987	-0.99305	NaN	NaN	NaN	NaN	NaN	NaN	NaN	NaN	NaN	NaN	NaN	NaN	-1.91183	NaN	NaN	NaN	NaN	NaN	NaN	NaN	-1.91604	-0.890596	-1.30563	-2.24656	NaN	NaN	NaN	NaN	NaN	NaN	NaN	NaN	NaN	NaN	NaN	NaN	-0.311008
COX17	Cytochrome c oxidase copper chaperone		1	25.4	11.546	94947000	NaN	NaN	NaN	-2.2195	-3.35573	NaN	NaN	NaN	NaN	-0.7824	NaN	-1.13277	NaN	NaN	NaN	-1.44103	NaN	-1.24372	-1.51727	NaN	NaN	-0.773968	NaN	-1.71249	0.184761	NaN	-2.31006	-0.737093	-2.13399	-1.72836	NaN	NaN	NaN	-1.43264	-1.08067	-0.056179	0.0371952	NaN	NaN	-1.61275	-0.714037	-1.23702	-2.41378
HNRNPD	Heterogeneous nuclear ribonucleoprotein D0		4	19.9	34.837	405000000	NaN	0.109034	0.343412	-1.08227	-0.324173	-0.534128	-0.51232	0.313494	0.680994	NaN	NaN	NaN	NaN	-1.71713	NaN	NaN	NaN	NaN	0.00595284	0.581282	0.843107	NaN	NaN	NaN	-1.00108	-0.849882	0.953594	-0.520933	NaN	-0.691391	NaN	NaN	0.155022	NaN	NaN	NaN	-0.0634918	-0.72154	-0.907217	NaN	NaN	NaN	1.64148
EIF3A	Eukaryotic translation initiation factor 3 subunit A;Eukaryotic translation initiation factor 3 subunit A;Eukaryotic translation initiation factor 3 subunit A;Eukaryotic translation initiation factor 3 subunit A;Eukaryotic translation initiation factor 3 subunit A;Eukaryotic translation initiation factor 3 subunit A;Eukaryotic translation initiation factor 3 subunit A		2	1.6	11.737	43546000	NaN	NaN	NaN	NaN	NaN	NaN	NaN	-3.07636	NaN	NaN	-1.71515	NaN	NaN	NaN	NaN	NaN	NaN	-2.52588	-3.6814	-2.76973	-4.06435	NaN	1.28013	NaN	NaN	NaN	NaN	NaN	NaN	NaN	NaN	NaN	NaN	NaN	-2.56732	NaN	NaN	NaN	NaN	NaN	NaN	NaN	NaN
MLEC	Malectin		1	8.9	8.0891	46053000	NaN	-1.36134	NaN	-1.59034	-1.81239	-1.4349	NaN	NaN	-1.32488	NaN	NaN	NaN	NaN	NaN	NaN	NaN	NaN	NaN	-1.65818	NaN	NaN	NaN	NaN	NaN	NaN	NaN	-2.20462	NaN	NaN	NaN	NaN	NaN	NaN	NaN	NaN	NaN	NaN	NaN	NaN	NaN	NaN	NaN	NaN
DYNC1H1	Cytoplasmic dynein 1 heavy chain 1		3	1.4	20.893	37807000	NaN	NaN	NaN	NaN	-1.76183	-2.04731	NaN	NaN	NaN	NaN	NaN	NaN	NaN	NaN	NaN	NaN	NaN	NaN	NaN	NaN	NaN	NaN	NaN	NaN	NaN	NaN	NaN	-2.46917	NaN	NaN	NaN	NaN	NaN	-1.96319	NaN	NaN	NaN	NaN	NaN	NaN	NaN	NaN	-2.23867
FLOT2	Flotillin-2	+	2	5.8	12.691	36290000	NaN	NaN	-3.68216	-2.39644	-1.96617	-2.42566	-2.81961	NaN	-2.58142	NaN	NaN	NaN	NaN	NaN	NaN	NaN	NaN	NaN	-2.80619	NaN	-3.53	NaN	NaN	NaN	NaN	NaN	NaN	NaN	NaN	NaN	NaN	NaN	NaN	-2.80594	NaN	NaN	NaN	NaN	NaN	NaN	NaN	NaN	-2.64877
TRIM25	E3 ubiquitin/ISG15 ligase TRIM25		1	1.9	6.663	58503000	NaN	NaN	-1.59379	-2.14123	-2.44369	NaN	NaN	NaN	NaN	NaN	-1.79634	-1.6265	NaN	NaN	NaN	-1.51919	NaN	-2.20983	-0.472063	-1.8599	-2.29316	NaN	NaN	NaN	NaN	NaN	NaN	-2.4356	-2.23679	NaN	NaN	NaN	NaN	NaN	NaN	NaN	NaN	NaN	NaN	NaN	NaN	-1.76615	NaN
RBM39	RNA-binding protein 39		16	38.2	323.31	6486300000	3.6806	4.0532	4.21079	3.70378	3.06883	2.84331	3.85521	3.14517	2.8235	4.38462	4.34861	4.65105	2.89731	3.59369	2.96022	4.67744	4.15376	4.0247	3.06789	3.16459	2.73044	3.94212	4.34076	4.99065	4.38429	3.46862	3.79498	3.59394	3.83702	3.30128	4.3035	3.73899	3.06901	4.14474	4.2292	4.39314	4.69937	4.73317	3.2526	3.62297	4.14495	4.37281	2.85147
MCM6	DNA replication licensing factor MCM6		3	5	18.139	62365000	-2.19495	NaN	NaN	-1.25401	-1.55504	-1.52114	-2.51795	-2.397	-2.36489	-2.21358	NaN	NaN	NaN	NaN	NaN	NaN	NaN	NaN	-2.33549	NaN	-2.39573	NaN	NaN	NaN	NaN	NaN	-1.54005	-1.6839	-1.96641	-1.52555	NaN	NaN	-1.83626	NaN	-2.23813	NaN	NaN	NaN	NaN	NaN	NaN	NaN	-1.66858
LAGE3	EKC/KEOPS complex subunit LAGE3		1	16.1	7.1506	26384000	NaN	NaN	NaN	NaN	-3.35675	NaN	NaN	NaN	NaN	NaN	NaN	NaN	NaN	NaN	NaN	NaN	NaN	NaN	-3.79611	NaN	-3.89832	NaN	NaN	NaN	NaN	NaN	NaN	NaN	NaN	NaN	NaN	NaN	NaN	NaN	NaN	NaN	NaN	NaN	NaN	NaN	NaN	NaN	NaN
TRIP12	E3 ubiquitin-protein ligase TRIP12		1	15.2	11.793	50486000	NaN	-3.25828	-3.31108	NaN	-3.1804	NaN	-3.12554	-3.0694	-3.69778	-2.24612	-1.41445	-1.05902	NaN	NaN	-3.24578	NaN	-1.87649	-1.74949	NaN	-2.99886	NaN	NaN	NaN	NaN	NaN	-2.37803	-2.3764	NaN	-3.03275	NaN	-2.885	-2.20749	-3.11785	-1.93973	NaN	-2.66526	-1.58083	-2.09067	-1.72939	-2.86854	-1.93983	NaN	NaN
MESDC2	LDLR chaperone MESD		1	4.7	6.4768	15176000	NaN	NaN	NaN	NaN	NaN	NaN	NaN	NaN	NaN	NaN	NaN	NaN	NaN	NaN	-3.52573	NaN	NaN	NaN	-3.79053	NaN	NaN	NaN	NaN	NaN	NaN	NaN	NaN	NaN	NaN	NaN	NaN	NaN	-4.1994	NaN	NaN	NaN	NaN	NaN	NaN	NaN	NaN	NaN	NaN
GANAB	Neutral alpha-glucosidase AB		23	34.9	271.23	2230500000	0.51815	1.21708	2.18006	2.42949	4.09449	3.75986	1.17921	1.7983	2.52094	0.933865	-0.273533	-1.04983	NaN	NaN	NaN	-0.965593	NaN	NaN	2.82535	1.64721	2.36749	0.526365	0.06427	-0.151398	-0.569361	0.585527	2.49059	1.82155	2.38625	2.21352	NaN	-1.35604	1.75224	0.151503	-0.0463753	-1.36364	-1.80791	-2.33439	NaN	-0.544476	-1.98141	NaN	2.46768
LBR	Lamin-B receptor		5	9.3	59.863	237630000	-2.03314	-0.499147	-0.915318	-1.79628	0.837376	0.0486336	NaN	-1.54332	-1.60308	NaN	-0.754513	-1.12121	NaN	-1.78035	-2.35023	NaN	NaN	NaN	-1.07156	-0.826736	-1.91317	-1.19681	-0.5902	NaN	NaN	NaN	-2.89785	NaN	-0.88199	-1.94032	NaN	NaN	-2.18146	-0.687225	-1.2322	NaN	-1.25844	-1.98709	-2.71747	-3.1599	NaN	NaN	-2.5935
RAB39A	Ras-related protein Rab-39A		1	6	6.5994	61752000	NaN	NaN	NaN	NaN	-0.856569	-0.955879	NaN	NaN	NaN	NaN	NaN	NaN	NaN	NaN	NaN	NaN	NaN	NaN	NaN	NaN	NaN	NaN	NaN	NaN	NaN	NaN	-0.66441	-1.4441	NaN	-1.08269	NaN	NaN	NaN	NaN	NaN	NaN	NaN	NaN	NaN	NaN	NaN	NaN	NaN
NOLC1	Nucleolar and coiled-body phosphoprotein 1		9	10.7	75.12	2374600000	2.06087	2.63826	0.17766	0.999504	2.12004	0.700335	2.13963	1.22054	-0.0360336	2.95122	4.20392	2.05682	2.20856	2.5588	1.16333	2.63298	3.12468	1.5898	0.900997	1.80922	0.0556602	2.93012	3.22078	3.26593	3.01704	2.94651	1.77231	1.11927	2.06457	1.07414	2.14667	2.57828	1.1762	2.75119	3.03847	3.21819	2.60856	2.19644	1.5339	2.26997	2.87115	2.93583	1.13669
SPCS2	Signal peptidase complex subunit 2		2	19.7	13.572	72328000	-2.21463	NaN	-3.52322	-0.79158	-2.37663	-1.08481	-2.17916	NaN	-0.440706	NaN	NaN	NaN	NaN	-2.69097	NaN	NaN	NaN	NaN	-2.01187	-3.6348	-2.44757	NaN	-2.84413	NaN	-2.92954	NaN	-1.91513	NaN	-3.03967	-2.38352	NaN	-3.30986	-2.24933	NaN	NaN	-2.87915	NaN	NaN	NaN	NaN	NaN	-3.17162	-3.44407
2002-09-01	Septin-2		4	17.1	34.626	260090000	-0.436445	-0.806713	NaN	-0.505047	-0.159781	-0.552614	-0.332701	-0.276134	0.586206	NaN	NaN	NaN	NaN	NaN	NaN	NaN	NaN	NaN	-1.26078	-1.52186	-0.806057	-2.29223	NaN	NaN	NaN	NaN	-1.46826	-0.333626	-0.0513306	-0.144533	NaN	-1.22783	-0.23735	NaN	NaN	NaN	-1.39341	NaN	NaN	NaN	NaN	NaN	-0.566139
EFTUD2	116 kDa U5 small nuclear ribonucleoprotein component		6	10.6	47.836	238260000	-1.90667	-1.45293	-1.17526	0.0167961	0.912075	-0.244394	-0.799212	-0.227144	0.564768	NaN	NaN	NaN	NaN	NaN	NaN	NaN	NaN	NaN	0.0681782	-1.16019	-0.835907	-2.04918	NaN	-2.1885	NaN	-1.98738	-1.26801	-0.106869	-2.24575	-1.14138	NaN	NaN	-0.572281	NaN	-1.50144	-2.91388	NaN	NaN	NaN	NaN	NaN	NaN	-0.764141
BRD3	Bromodomain-containing protein 3		1	2.9	6.8392	92378000	-0.914799	-1.61786	NaN	-3.01395	NaN	-3.44507	-2.07686	NaN	NaN	-1.74863	0.237505	-2.69762	-2.13464	-0.888172	NaN	NaN	NaN	-2.63331	-2.82334	-1.63325	-3.9327	-2.36629	0.951719	NaN	-1.20354	-1.11429	NaN	-2.17024	-2.66779	NaN	-1.73105	-1.5189	-3.31928	NaN	-1.27311	-1.19541	-1.57636	-1.4649	NaN	-2.41578	NaN	-1.38706	-3.34155
PDIA6	Protein disulfide-isomerase A6		2	6.6	12.871	39230000	NaN	NaN	NaN	NaN	-2.54741	NaN	NaN	NaN	NaN	NaN	NaN	NaN	NaN	NaN	NaN	NaN	NaN	NaN	-1.96559	-2.04416	NaN	NaN	NaN	NaN	NaN	NaN	NaN	-2.07264	-2.15388	NaN	NaN	NaN	NaN	NaN	NaN	NaN	NaN	NaN	NaN	NaN	NaN	NaN	-2.17083
PAFAH1B3	Platelet-activating factor acetylhydrolase IB subunit gamma		4	24.2	47.102	211900000	NaN	NaN	NaN	-1.84451	-2.38758	-2.19501	-1.9736	-1.63999	1.43402	NaN	NaN	NaN	NaN	NaN	NaN	NaN	NaN	NaN	NaN	NaN	NaN	NaN	NaN	NaN	NaN	NaN	-1.89425	-0.584169	-1.42807	-0.811951	NaN	NaN	NaN	NaN	NaN	NaN	NaN	NaN	NaN	NaN	NaN	NaN	2.99583
EBP	3-beta-hydroxysteroid-Delta(8),Delta(7)-isomerase		2	12.2	19.222	148480000	NaN	NaN	NaN	-0.280197	0.230719	-0.386032	-0.591358	-0.574823	-1.06462	-1.46193	NaN	-2.0339	NaN	NaN	NaN	NaN	NaN	NaN	NaN	NaN	NaN	NaN	-1.231	-1.45603	NaN	-1.441	-0.406723	-1.49534	-1.62011	-1.46902	NaN	NaN	-0.914921	NaN	-1.62158	NaN	NaN	NaN	NaN	NaN	NaN	NaN	-1.63756
PLEC	Plectin		2	0.5	11.142	1798500000	1.53731	1.76516	2.13785	1.61223	1.39222	1.78263	2.50869	1.56968	0.651781	2.71425	2.54933	2.5746	0.623289	1.2623	1.0736	2.61537	2.45341	2.81211	1.44193	2.15196	2.13684	2.65149	1.90969	2.21436	3.13786	1.70654	1.89943	2.39109	1.48422	1.66339	2.57277	1.73497	0.853859	1.6018	2.71758	2.2715	2.49152	2.27416	1.30238	1.92922	2.71663	2.64246	1.62055
PPA1	Inorganic pyrophosphatase		4	25.3	38.008	150200000	NaN	NaN	NaN	-0.938913	-1.36534	-1.00182	-1.84112	-1.60169	-2.15077	NaN	NaN	NaN	NaN	NaN	NaN	NaN	NaN	NaN	-0.819857	NaN	NaN	NaN	NaN	NaN	-1.35872	NaN	-0.930344	0.475277	-1.77695	-1.48736	NaN	NaN	NaN	NaN	NaN	NaN	NaN	NaN	NaN	NaN	NaN	NaN	1.23215
PTGES3	Prostaglandin E synthase 3		1	8.1	6.9859	96384000	-2.0146	-2.11846	-2.30338	-2.10581	-1.60936	-1.67612	-1.16012	-2.11368	-2.25238	NaN	NaN	NaN	-3.72208	-4.11385	NaN	NaN	NaN	NaN	-1.37054	NaN	-3.01568	-2.95045	-2.16491	NaN	-2.39284	-1.82621	-0.1418	-1.92419	-1.96045	NaN	NaN	-1.94356	-1.19267	NaN	-2.21967	-1.93326	NaN	NaN	NaN	NaN	NaN	-1.65183	-1.40613
NONO	Non-POU domain-containing octamer-binding protein		24	58.8	323.31	5913700000	3.90906	2.93105	3.91397	3.69666	4.94776	4.52748	2.79655	3.31671	4.13269	2.56521	1.73372	2.4858	-2.82301	0.886919	NaN	1.05421	0.768229	1.09051	2.7534	2.6479	2.35203	1.07763	1.70843	0.952116	2.46183	3.4404	4.83208	3.81081	3.87898	4.2037	-0.150726	2.56462	3.99744	2.79233	2.27398	0.641201	1.31625	1.06416	-0.164248	-1.17229	1.57268	-1.21532	3.41188
PWP2	Periodic tryptophan protein 2 homolog		1	1.7	7.8186	8795600	NaN	NaN	NaN	-2.44574	-3.2282	NaN	NaN	NaN	NaN	NaN	NaN	NaN	NaN	NaN	NaN	NaN	NaN	NaN	NaN	NaN	NaN	NaN	NaN	NaN	NaN	NaN	NaN	NaN	NaN	NaN	NaN	NaN	NaN	NaN	NaN	NaN	NaN	NaN	NaN	NaN	NaN	NaN	NaN
RAB			1	9.2	7.8662	35329000	NaN	NaN	NaN	NaN	-1.07104	-2.14585	NaN	NaN	NaN	NaN	NaN	NaN	NaN	NaN	NaN	NaN	NaN	NaN	NaN	NaN	NaN	NaN	NaN	NaN	NaN	NaN	NaN	NaN	NaN	NaN	NaN	NaN	NaN	NaN	NaN	NaN	NaN	NaN	NaN	NaN	NaN	NaN	NaN
RNPS1	RNA-binding protein with serine-rich domain 1		6	28.4	42.93	1138400000	1.65974	2.5175	-0.288019	0.537374	-0.302916	-1.08907	0.588865	0.358677	-0.781685	1.55145	2.57714	1.43409	0.967857	-0.734718	-1.57073	2.25466	0.536882	1.14143	1.44792	1.54314	1.58662	1.04186	2.19705	1.93416	1.80928	0.116741	1.03051	1.32131	0.924683	-0.365864	2.249	1.03866	0.163054	1.47926	1.76848	2.18162	1.91997	1.2634	0.0537624	1.17802	1.84938	2.19139	0.835091
PCBP1	Poly(rC)-binding protein 1		8	49.2	185.71	2174900000	2.16417	1.66639	2.11603	2.30154	2.79749	2.93334	1.88037	2.48914	3.11138	-0.31159	-0.457695	0.842579	NaN	-1.03777	-1.22885	0.0588398	-0.0075798	-0.789314	1.62802	0.934206	1.72716	0.655029	0.589027	0.939384	0.0234928	2.17254	2.70375	2.75826	1.98315	2.65954	-0.0481796	1.63795	3.8362	1.52971	1.076	0	1.77172	0.709829	0.00238991	0.185947	0.315006	NaN	3.52809
PCBP2	Poly(rC)-binding protein 2		6	38.5	80.003	1320400000	1.09959	1.12928	2.42619	2.27747	2.06842	2.39725	1.03177	1.82231	2.15533	0.186253	-0.744022	-0.885014	NaN	-0.75367	-1.65765	-0.136061	NaN	NaN	0.752014	0.705734	1.37623	0.59697	0.188601	0.42017	-0.217636	1.24743	0.995064	1.57945	1.62904	1.55465	-2.03817	-0.205641	2.70662	-0.0745811	0.739191	-0.623039	1.25436	-0.357189	NaN	NaN	0.3125	NaN	2.38646
SF3B3	Splicing factor 3B subunit 3		6	7.4	75.816	456050000	-1.81875	-0.999475	-0.587372	2.47507	1.03518	0.783239	0.887234	1.13126	1.67386	NaN	NaN	NaN	NaN	NaN	NaN	NaN	NaN	NaN	0.756155	-0.62483	0.245531	-0.675446	-1.59032	-2.39725	NaN	-1.25891	1.24387	-1.54206	-0.585157	-0.818529	NaN	-1.20564	-0.514629	NaN	-1.27188	NaN	-2.18851	NaN	NaN	NaN	NaN	NaN	-0.79406
SAFB	Scaffold attachment factor B1		2	2.6	10.982	120190000	-1.92642	-1.74106	-3.21719	NaN	-2.06239	NaN	-1.72154	-1.93662	-1.97222	NaN	1.65374	-1.89766	NaN	NaN	NaN	-2.532	NaN	NaN	-1.56942	NaN	-1.82524	NaN	-0.642069	-2.34194	-2.87496	-1.84716	-1.92715	NaN	-2.32393	NaN	NaN	NaN	NaN	NaN	-1.58296	-2.49631	NaN	-1.50992	NaN	-2.392	-2.48984	NaN	NaN
TRIP13	Pachytene checkpoint protein 2 homolog		1	2.3	6.4403	26810000	NaN	NaN	NaN	NaN	-1.97164	-1.95399	NaN	-2.31752	-2.37944	NaN	NaN	NaN	NaN	NaN	NaN	NaN	NaN	NaN	NaN	NaN	NaN	NaN	NaN	NaN	NaN	NaN	NaN	NaN	NaN	NaN	NaN	NaN	NaN	NaN	NaN	NaN	NaN	NaN	NaN	NaN	NaN	NaN	-2.61662
MED1	Mediator of RNA polymerase II transcription subunit 1		5	4.6	69.058	812540000	0.765381	1.28677	-0.328745	-1.7471	0.186443	-1.06664	0.56233	0.406919	-0.69688	0.992744	1.70098	0.112917	-2.03159	1.21574	-0.986435	0.856018	1.07117	0.317312	0.222485	1.53872	-0.274906	0.563614	1.59417	0.977438	0.823359	0.581038	-1.22808	-0.303925	0.944929	-1.09837	1.09295	1.97007	NaN	0.350872	2.3301	1.03296	0.990381	1.15905	1.22711	-0.0427971	1.40564	0.30024	-1.57354
HMGN3	High mobility group nucleosome-binding domain-containing protein 3		2	39	14.221	199610000	NaN	NaN	-2.8504	-1.69977	-0.679209	-1.96959	NaN	NaN	NaN	-0.746439	-0.19343	-1.86061	NaN	0.386036	NaN	-2.46537	-1.69181	NaN	NaN	NaN	-0.925051	NaN	-2.36701	-2.40997	-0.254032	-0.780165	-0.139927	-0.430508	-0.104452	-1.28227	NaN	NaN	NaN	1.69297	-0.705269	-1.29455	NaN	-3.17321	NaN	-2.89568	-2.81618	NaN	-1.63941
ELAVL1	ELAV-like protein 1		9	31.6	66.393	843820000	1.65195	-0.695204	-0.512968	1.03015	1.71229	1.24389	1.81912	1.77643	2.87015	-0.557678	-0.529701	-1.60569	NaN	-1.85223	NaN	-0.984724	0.452236	-1.49196	0.876251	0.0190964	-0.511271	-0.078022	-1.5744	NaN	-1.74207	0.686399	0.990854	0.552238	0.599072	0.0227966	-3.32957	-0.626419	0.522802	NaN	-0.642817	NaN	-0.693584	-0.61117	-1.62642	NaN	NaN	NaN	2.1874
NSDHL	Sterol-4-alpha-carboxylate 3-dehydrogenase, decarboxylating		2	13.4	15.663	79830000	-1.77628	NaN	NaN	-1.30363	-0.787544	-1.5291	NaN	NaN	NaN	NaN	NaN	NaN	NaN	NaN	NaN	-1.87538	NaN	-1.33882	NaN	NaN	NaN	NaN	-1.74819	NaN	-0.927103	NaN	-1.35347	-1.16683	NaN	-1.51321	NaN	NaN	NaN	NaN	NaN	-1.15816	NaN	NaN	NaN	NaN	NaN	NaN	-1.36579
SLC1A5	Neutral amino acid transporter B(0);Amino acid transporter;Amino acid transporter;Amino acid transporter		2	9.6	16.393	98869000	-1.89952	NaN	-1.73064	-0.63393	-1.38162	-1.11126	NaN	-1.46379	-1.14083	NaN	NaN	NaN	NaN	NaN	NaN	NaN	NaN	NaN	-1.13432	NaN	-0.944382	-1.26505	-1.32182	-1.1463	NaN	NaN	-1.40469	-1.18209	-1.50455	-1.44377	NaN	NaN	-1.2844	NaN	NaN	NaN	NaN	NaN	NaN	NaN	NaN	NaN	-1.12556
NEDD8	NEDD8		2	38	10.519	44658000	NaN	NaN	NaN	NaN	-2.04341	-1.24993	NaN	NaN	NaN	NaN	NaN	NaN	NaN	NaN	NaN	NaN	NaN	NaN	NaN	NaN	NaN	NaN	NaN	-1.66955	NaN	NaN	NaN	NaN	NaN	-1.50662	NaN	NaN	NaN	-1.29065	NaN	NaN	NaN	NaN	NaN	NaN	NaN	NaN	-0.223513
2007-09-01	Septin-7		5	17.7	42.612	354290000	-0.425259	-1.94618	-2.43697	-0.144623	0.805174	1.17716	-0.194828	0.546751	0.620644	NaN	NaN	-1.73871	NaN	-2.06861	NaN	NaN	NaN	NaN	-1.74362	-1.95665	-1.41392	NaN	NaN	NaN	NaN	-0.757938	-0.455368	-0.810455	0.394623	0.911509	-2.50591	-0.792051	0.384586	-1.81685	-1.82753	NaN	-1.82184	-1.82937	-1.95913	NaN	NaN	NaN	-0.242619
ADRM1	Proteasomal ubiquitin receptor ADRM1		2	8.4	28.844	190370000	-1.29594	-2.59173	-0.688267	-0.583132	-1.04158	-0.435755	0.219837	0.658175	0.622395	NaN	NaN	NaN	NaN	NaN	NaN	NaN	NaN	NaN	-1.20834	-2.82025	-1.49783	-1.79635	-2.22615	NaN	-2.76765	-2.02833	-0.961943	NaN	-1.18687	-1.64849	-3.16484	-2.42595	-0.0260887	-1.53658	-2.16305	-2.05875	NaN	-2.31404	NaN	NaN	NaN	-2.48517	-0.47801
DDB1	DNA damage-binding protein 1		5	7.5	43.689	187060000	NaN	NaN	-0.929981	0.557631	-1.68221	-2.41738	-0.880613	-1.26579	0.591768	NaN	NaN	NaN	NaN	NaN	NaN	NaN	NaN	NaN	0.148832	-1.62483	-0.0648003	NaN	NaN	NaN	NaN	NaN	NaN	NaN	-2.21741	NaN	NaN	NaN	0.843521	-0.795942	NaN	NaN	NaN	NaN	NaN	NaN	NaN	NaN	-1.98361
DPYSL2	Dihydropyrimidinase-related protein 2		2	4.1	11.697	26470000	NaN	NaN	-2.31215	-2.98484	-1.90924	-2.55446	NaN	NaN	-3.32178	NaN	NaN	NaN	NaN	NaN	NaN	NaN	NaN	NaN	NaN	NaN	NaN	NaN	NaN	NaN	NaN	NaN	NaN	NaN	NaN	-3.05	NaN	NaN	-2.58343	NaN	NaN	NaN	NaN	NaN	NaN	NaN	NaN	NaN	-2.98582
SYPL1	Synaptophysin-like protein 1		1	8.1	6.7597	4353100	NaN	NaN	NaN	-0.434645	NaN	NaN	NaN	NaN	NaN	NaN	NaN	NaN	NaN	NaN	NaN	NaN	NaN	NaN	NaN	NaN	NaN	NaN	NaN	NaN	NaN	NaN	NaN	NaN	NaN	NaN	NaN	NaN	NaN	NaN	NaN	NaN	NaN	NaN	NaN	NaN	NaN	NaN	-3.43273
RBBP7	Histone-binding protein RBBP7		4	26	69.495	733910000	-1.07848	-0.379402	1.21854	1.58249	2.36477	1.80452	-0.12266	1.61617	1.60898	-0.470791	NaN	-0.439447	-2.53484	NaN	NaN	-0.999609	NaN	NaN	1.21627	-0.450102	NaN	-0.236683	-0.63789	-0.374542	-0.605253	-0.689548	-0.985525	0.673231	-0.0582409	0.120333	NaN	NaN	0.595222	-0.0451241	0.0476151	-0.181143	-0.158829	NaN	NaN	NaN	NaN	-0.922047	1.80799
SRSF7	Serine/arginine-rich splicing factor 7		5	34.8	48.436	1187800000	2.88313	3.28669	1.54726	1.03245	1.04606	1.40323	NaN	NaN	0.654276	2.73622	2.54368	2.87132	0.452246	0.698809	0.127283	2.63605	0.072197	2.46442	1.64334	1.35752	2.32708	1.55441	1.46645	2.34325	0.801262	NaN	1.88892	1.79431	1.42689	1.96348	1.86923	NaN	0.969982	2.50741	0.2358	0.687449	1.22122	NaN	0.451427	1.73655	NaN	NaN	1.31668
CPSF6	Cleavage and polyadenylation specificity factor subunit 6		5	18.4	323.31	7835200000	2.91675	3.49496	3.0267	3.47512	3.37331	2.39458	4.71819	3.67849	2.25137	4.55263	4.92572	4.31283	2.99051	3.66573	2.94669	5.08617	3.89078	2.81805	3.24998	4.11181	3.429	4.08533	4.54828	4.82948	4.97461	4.20667	3.14328	3.556	4.03485	3.33244	5.6045	4.45792	3.3624	3.7645	4.62518	4.70875	4.94744	4.86272	3.44735	3.4527	4.66826	4.85596	2.65013
FSCN1	Fascin		15	36.9	185.89	2414900000	2.46814	2.09871	2.61287	3.0126	3.93709	3.97747	3.19518	2.71143	4.10349	-0.0839081	-0.442652	0.47917	NaN	-3.27879	-2.61696	-1.88037	-0.64097	-0.256994	3.0038	0.279705	2.18811	0.497398	0.158464	0.1168	-2.41328	1.77553	3.62266	1.55151	2.03463	2.50582	NaN	0.401426	1.75152	-0.0776119	0.31925	-2.61465	-0.72706	-1.41034	-2.60594	-2.98308	-2.76868	NaN	1.12222
HIST2H2AA3	Histone H2A type 2-A		1	58.1	64.599	198340000	NaN	-0.37752	NaN	NaN	NaN	NaN	NaN	NaN	NaN	NaN	-1.76448	NaN	NaN	3.27246	NaN	NaN	NaN	NaN	NaN	NaN	NaN	NaN	NaN	NaN	NaN	NaN	NaN	NaN	NaN	NaN	NaN	NaN	NaN	NaN	NaN	NaN	NaN	NaN	NaN	NaN	NaN	NaN	NaN
UGP2	UTP--glucose-1-phosphate uridylyltransferase		2	6.8	18.696	63739000	-1.71841	NaN	-2.83318	-2.33401	-2.27187	-1.56257	-2.1951	-2.08837	-1.33809	NaN	NaN	NaN	NaN	NaN	NaN	NaN	NaN	NaN	-2.21108	-2.83116	NaN	NaN	NaN	NaN	NaN	NaN	NaN	-2.20186	NaN	-1.82268	NaN	NaN	-2.1116	NaN	NaN	NaN	NaN	NaN	NaN	-1.9287	NaN	NaN	-1.12187
IMMT	MICOS complex subunit MIC60		2	25.2	12.151	20096000	NaN	NaN	NaN	-2.94474	-3.44198	-3.4195	NaN	NaN	NaN	NaN	NaN	NaN	NaN	NaN	NaN	NaN	NaN	NaN	-3.63735	NaN	NaN	NaN	NaN	NaN	NaN	NaN	NaN	NaN	NaN	NaN	NaN	NaN	NaN	NaN	NaN	NaN	NaN	NaN	NaN	NaN	NaN	NaN	-2.4537
SMU1	WD40 repeat-containing protein SMU1;WD40 repeat-containing protein SMU1, N-terminally processed		5	9.2	32.03	217470000	-1.70275	-1.52454	-1.11832	-0.992123	0.616076	-0.900797	-0.790714	-0.932962	-1.56987	NaN	NaN	NaN	NaN	NaN	NaN	NaN	NaN	NaN	-0.000509262	-1.69962	-1.65464	NaN	NaN	NaN	NaN	-1.24789	-0.177193	-1.46007	-1.4508	-0.788879	NaN	NaN	-1.7885	NaN	NaN	NaN	NaN	NaN	NaN	NaN	NaN	NaN	-2.27278
RABL6	Rab-like protein 6		2	3.8	52.115	602150000	NaN	-0.738607	0.165424	-0.332123	-0.525658	-1.59273	NaN	0.788523	-0.338566	1.18683	1.0717	0.681566	-0.94618	0.61698	NaN	0.754417	0.234505	0	0.266966	0.692533	-0.236244	0.476755	1.68769	1.13114	0.722769	0.148136	-1.27267	-0.289646	0.436733	-0.296646	0.776064	NaN	-1.18714	-0.356138	0.709517	0.174299	NaN	NaN	NaN	-0.487881	0.511086	0.970106	-0.86532
TUBB8	Tubulin beta-8 chain		2	24.5	323.31	2171100000	NaN	NaN	1.49649	3.93091	3.69994	3.72352	NaN	1.91706	3.44616	NaN	NaN	NaN	NaN	NaN	NaN	NaN	NaN	NaN	1.00574	NaN	0.628323	1.07849	NaN	1.2375	NaN	1.33596	NaN	2.78875	3.21797	2.75724	NaN	NaN	NaN	1.47013	NaN	NaN	NaN	NaN	NaN	NaN	NaN	NaN	4.02343
TIMM50	Mitochondrial import inner membrane translocase subunit TIM50		6	23.5	42.582	241730000	NaN	NaN	NaN	-1.09596	0.220182	-0.926117	-0.489904	-0.852112	-0.265673	-1.40089	-1.47508	NaN	NaN	NaN	NaN	NaN	NaN	NaN	-1.32223	-0.99806	-1.41437	NaN	-1.3396	NaN	NaN	-1.30951	-0.0658321	-1.30627	-1.33467	-0.960527	NaN	NaN	NaN	NaN	NaN	NaN	NaN	-1.84767	NaN	NaN	-1.56922	NaN	-0.815557
TBC1D10B	TBC1 domain family member 10B		2	8.6	43.728	1430200000	2.25208	1.09643	-0.607447	0.7477	-0.246927	0.37809	3.20312	2.50379	0.600803	2.18169	2.38537	1.36332	2.10373	2.28632	-0.740353	1.89714	1.97711	1.90391	0.689945	1.73277	0.261814	2.33519	2.65916	2.10993	2.92608	2.7007	2.17287	0.189678	1.14074	1.28363	1.6029	2.6848	0.801554	1.88619	2.44731	1.95481	2.52207	2.97264	2.01957	1.4127	1.73382	2.9174	0.395548
HSP90AB4P	Putative heat shock protein HSP 90-beta 4		1	7.1	14.879	81991000	-1.73342	NaN	NaN	1.06916	NaN	NaN	-1.03945	-1.30737	NaN	NaN	NaN	NaN	-2.77112	NaN	NaN	NaN	NaN	NaN	-1.09734	NaN	NaN	-2.06136	NaN	NaN	NaN	NaN	NaN	NaN	NaN	NaN	NaN	NaN	0.772928	NaN	NaN	NaN	NaN	NaN	NaN	NaN	NaN	NaN	NaN
HSP90AB2P	Putative heat shock protein HSP 90-beta 2		2	19.4	22.163	242550000	NaN	NaN	NaN	NaN	1.27215	0.189955	NaN	NaN	NaN	-1.85765	NaN	NaN	NaN	NaN	NaN	-2.14271	NaN	NaN	NaN	-1.79176	NaN	NaN	NaN	NaN	NaN	NaN	-0.816618	0.834032	-0.66135	NaN	NaN	NaN	-0.309536	-0.72842	NaN	NaN	NaN	NaN	NaN	NaN	NaN	-1.61463	-0.0644913
HIST2H2BF	Histone H2B type 2-F		0	63.5	125.75	69373000000	6.61972	8.12679	6.48447	5.59789	7.09785	6.79372	6.55378	6.14601	6.58033	6.85589	9.35767	8.29415	5.72798	7.8171	6.88741	6.65545	7.39707	7.76174	6.46266	5.84144	5.99986	6.93107	9.14559	8.66865	6.90251	7.14786	7.4733	6.16157	7.73422	6.20744	5.91934	6.41215	6.6872	8.35437	7.38778	7.07204	6.89659	8.0851	7.34914	7.13738	7.41996	6.74035	5.59319
ZC3H13	Zinc finger CCCH domain-containing protein 13		14	11.3	103.37	820820000	-5.05395	-3.32543	NaN	NaN	-5.98256	NaN	NaN	NaN	NaN	NaN	-0.690718	NaN	NaN	-3.65001	NaN	NaN	NaN	NaN	3.5057	2.72912	4.3607	NaN	-0.774605	-5.63656	-6.02899	NaN	NaN	NaN	-6.89613	NaN	NaN	NaN	NaN	NaN	-4.65383	-5.12473	NaN	NaN	NaN	NaN	NaN	NaN	-5.57399
PRPF38B	Pre-mRNA-splicing factor 38B		9	17.8	67.696	1028100000	1.27391	1.35934	0.849512	-0.162132	0.919529	-0.0800438	-0.118015	-0.432671	-1.15245	1.39271	2.19782	2.04355	NaN	0.619089	0.160166	2.06444	1.44693	1.32567	1.27687	2.35697	2.74846	1.88754	0.907663	1.87204	1.1868	0.928852	1.36568	0.584766	1.34718	1.64263	-0.31674	-0.226259	0.0356598	1.55506	1.30773	0.797462	0.337692	1.52652	0.974689	1.02876	2.04318	0.778538	-0.593037
ARL6IP4	ADP-ribosylation factor-like protein 6-interacting protein 4		2	27.1	323.31	22470000000	5.54557	4.57979	4.94866	5.79238	4.27438	4.58625	6.37224	5.14565	3.98181	6.50093	5.33273	6.02416	6.01394	4.61055	3.83599	6.60685	5.774	5.55734	5.37218	4.65514	5.20783	6.51751	5.98856	6.39285	7.30276	5.5355	5.1012	6.17126	5.3386	5.04869	6.21808	5.32496	4.70099	5.93985	6.05275	7.25886	5.94134	5.58864	4.77268	5.77577	6.43206	7.61167	5.45425
NIPBL	Nipped-B-like protein		3	5	33.277	168820000	-1.85807	-1.6622	-2.58597	NaN	-1.48824	NaN	-1.6975	-1.47197	-2.89658	-1.62011	-1.04545	-1.35312	NaN	-1.78292	NaN	-1.91752	-1.43131	NaN	-2.54528	-1.41638	-2.83648	NaN	0.916449	-1.23558	-0.924261	-1.00591	-1.69859	NaN	-1.51613	NaN	-0.88669	-1.00796	NaN	-1.32326	-1.23765	-1.30004	-0.291471	-1.55721	-1.60065	NaN	-1.28805	NaN	NaN
PRPF8	Pre-mRNA-processing-splicing factor 8		3	1.7	23.727	92063000	NaN	-2.83272	-2.30454	-1.92427	-1.47487	-2.1811	-0.13028	NaN	-2.71351	NaN	-3.37921	NaN	NaN	NaN	NaN	NaN	NaN	NaN	-2.3552	-3.01868	-2.33309	-2.56871	-2.79291	NaN	-2.0051	-2.69237	-2.36405	-2.49086	-2.71921	-2.61352	NaN	NaN	NaN	NaN	NaN	NaN	NaN	NaN	NaN	NaN	-3.77581	-1.44111	NaN
FIP1L1	Pre-mRNA 3'-end-processing factor FIP1		4	9.8	29.47	349580000	0.334425	-0.117676	-0.472742	-0.594223	-1.30089	-0.49839	-0.627123	-0.687677	-1.31803	0.285295	0.365776	0.0405846	NaN	NaN	NaN	-0.722853	-0.599958	-0.305401	-0.602592	-0.136959	-1.21321	-0.106533	2.564	0.136522	0.144855	-0.0471668	-0.490404	-0.740425	-1.12985	-0.0762405	-1.12475	-0.771036	-1.05748	-0.295099	0.39436	0.125263	0.220379	-0.454346	-0.873667	-0.225296	-0.129177	0.612774	-0.592649
SND1	Staphylococcal nuclease domain-containing protein 1		12	21.3	88.968	698600000	0.20365	-0.6231	0.444599	0.530909	1.90958	1.97868	0.742561	1.21059	3.09709	NaN	NaN	-1.43263	NaN	NaN	NaN	NaN	NaN	NaN	1.23843	-1.07881	-0.120535	NaN	-1.43513	NaN	NaN	-0.733536	0.333687	0.447308	0.521866	0.43491	NaN	NaN	0.586176	-1.07784	NaN	NaN	-1.86662	NaN	NaN	NaN	NaN	NaN	0.953335
RSRC2	Arginine/serine-rich coiled-coil protein 2		6	18.2	41.398	852160000	1.15592	1.39162	1.37678	-0.60532	-0.380772	-0.0927048	0.975065	0.135895	-0.258137	1.78214	1.3786	1.48907	0.629702	0.28113	-1.13683	0.924662	0.837254	0.994371	0.282103	-0.263859	0.687622	0.932787	1.005	1.91616	1.62134	1.24594	-0.219397	0.805954	0.739632	0.779205	0.396149	0.863369	0.118511	1.6443	0.855986	1.34051	2.27082	1.42955	1.00816	1.15645	0.946327	1.10897	-0.0401936
ZC3HAV1	Zinc finger CCCH-type antiviral protein 1		1	2.4	6.3451	29557000	-2.3139	NaN	-2.58933	-3.45417	-3.6992	-2.50353	-3.22736	-2.6677	-2.62041	NaN	NaN	NaN	NaN	NaN	NaN	NaN	NaN	NaN	-3.12257	NaN	-4.04888	NaN	NaN	NaN	NaN	NaN	-2.63529	NaN	-3.86518	-3.11437	NaN	NaN	-2.17768	NaN	NaN	NaN	-3.60506	NaN	NaN	NaN	NaN	NaN	NaN
NUFIP2	Nuclear fragile X mental retardation-interacting protein 2		2	3.5	13.538	48055000	NaN	NaN	NaN	-1.32601	-1.3429	NaN	NaN	NaN	NaN	NaN	-0.280109	-1.81216	NaN	NaN	NaN	-1.38222	-2.24827	NaN	NaN	NaN	NaN	-0.488846	NaN	-1.31258	NaN	NaN	NaN	NaN	-2.09682	NaN	NaN	NaN	NaN	NaN	NaN	-0.948034	NaN	NaN	NaN	-1.681	-0.563629	-1.0518	NaN
YTHDF3	YTH domain-containing family protein 3		2	5.5	11.778	43516000	NaN	NaN	NaN	NaN	NaN	-1.55723	NaN	NaN	NaN	NaN	NaN	NaN	NaN	NaN	NaN	NaN	NaN	NaN	-1.30659	NaN	NaN	NaN	-4.12441	NaN	NaN	NaN	-2.9024	NaN	NaN	NaN	NaN	NaN	NaN	NaN	NaN	NaN	NaN	NaN	NaN	NaN	-4.18069	NaN	-1.35342
CENPV	Centromere protein V		2	14.9	15.772	59563000	-1.67401	-2.83755	-3.3739	-1.913	-0.989763	-1.94873	-2.2133	NaN	NaN	NaN	NaN	NaN	NaN	NaN	NaN	NaN	NaN	NaN	NaN	-1.97089	NaN	NaN	NaN	NaN	NaN	NaN	-1.59144	NaN	NaN	-1.81791	NaN	NaN	NaN	NaN	NaN	NaN	NaN	NaN	NaN	NaN	NaN	NaN	NaN
MTDH	Protein LYRIC		2	5.1	20.462	144370000	-2.33933	-2.38636	-3.41097	-2.6062	0	-2.87093	NaN	-3.06005	-3.88696	NaN	-0.760603	-1.50042	NaN	-2.23523	NaN	-1.68325	-1.5483	-1.7397	-3.79156	-2.86601	-2.90109	NaN	1.97404	-1.87265	-2.62732	-1.965	-2.08436	NaN	-1.79773	-0.965134	NaN	-2.97697	NaN	-1.98484	-0.800436	NaN	-2.53443	-2.4421	-2.60917	-1.78587	0.68825	-2.16578	NaN
LUZP1	Leucine zipper protein 1		1	5.5	8.2599	2229200000	0.609249	1.15291	2.05853	1.77078	2.21911	1.53805	1.50252	0.913715	0.195467	3.14079	3.23994	4.04383	-0.430796	0.959969	-0.790203	3.71853	3.12908	3.5803	1.11826	2.03453	1.92721	2.79341	3.08904	4.52464	3.6897	0.362886	1.00788	2.5121	2.8627	1.83021	2.37181	1.35936	0.198383	3.1743	3.26272	2.69106	1.94879	1.03523	-0.068903	2.17857	3.61688	3.29779	0.781477
ALYREF	THO complex subunit 4		3	16.3	18.991	70426000	NaN	NaN	NaN	-1.84076	NaN	NaN	NaN	-1.56644	NaN	-1.0083	-0.908953	NaN	NaN	NaN	NaN	-1.39825	-0.929985	NaN	NaN	NaN	NaN	NaN	-0.568415	-1.62802	-1.08004	NaN	NaN	NaN	NaN	NaN	NaN	NaN	NaN	-0.905067	1.20015	NaN	-1.26233	-0.851637	NaN	NaN	-1.43558	-1.37319	NaN
ZC3H18	Zinc finger CCCH domain-containing protein 18		1	1.7	6.9453	22868000	NaN	NaN	NaN	NaN	NaN	NaN	NaN	NaN	NaN	NaN	-2.53887	NaN	NaN	NaN	NaN	NaN	NaN	NaN	-1.46656	-2.45298	-2.69501	NaN	-1.8535	NaN	NaN	NaN	NaN	NaN	NaN	NaN	NaN	NaN	NaN	NaN	NaN	NaN	NaN	NaN	NaN	NaN	NaN	NaN	NaN
THOC6	THO complex subunit 6 homolog		1	6.4	11.121	29654000	NaN	NaN	NaN	NaN	-1.65161	-2.44009	NaN	-3.10963	NaN	NaN	NaN	NaN	NaN	NaN	NaN	NaN	NaN	NaN	NaN	NaN	NaN	NaN	NaN	NaN	NaN	-3.78478	-2.9341	-3.02966	-2.93249	NaN	NaN	NaN	NaN	NaN	NaN	NaN	NaN	NaN	NaN	NaN	NaN	NaN	-2.87631
CIR1	Corepressor interacting with RBPJ 1		3	5.3	25.294	1249900000	1.66241	1.12397	-0.534103	NaN	0.0123158	0.151089	2.87086	2.27065	0.530952	1.83778	1.93069	1.9278	1.47678	1.61651	NaN	1.69352	1.85672	-0.00581169	1.06705	1.63891	1.04866	2.42113	2.21449	2.52243	2.79348	NaN	NaN	NaN	1.30029	1.42857	1.72058	2.30281	1.27396	2.04764	1.94839	2.55411	2.42988	2.42337	2.07011	1.88698	2.23812	3.34431	-3.65054
DDX42	ATP-dependent RNA helicase DDX42		5	8.7	28.518	411010000	NaN	-0.420599	-0.978113	NaN	-0.779219	-1.05906	-1.62264	-0.388304	-2.13148	NaN	1.13895	-0.129093	-3.11267	2.31112	NaN	NaN	0.361422	-0.00516129	-1.56244	1.09002	-1.01377	NaN	-0.416723	-1.10125	NaN	0.326344	NaN	NaN	-0.00482559	0.0571213	-0.420895	-0.436247	NaN	NaN	0.975794	NaN	0.239752	-0.830734	-1.88551	-0.28684	0.635887	0.346891	NaN
TMED7	Transmembrane emp24 domain-containing protein 7		3	22.3	24.668	68249000	NaN	NaN	NaN	-1.72424	-0.549471	-1.37271	NaN	NaN	-2.31068	NaN	NaN	NaN	NaN	NaN	NaN	NaN	NaN	NaN	-2.2223	NaN	NaN	-2.31843	NaN	NaN	NaN	NaN	-1.48017	NaN	-1.82722	NaN	NaN	NaN	NaN	NaN	NaN	NaN	NaN	NaN	NaN	NaN	NaN	NaN	NaN
PLD3	Phospholipase D3		2	4.7	13.146	1331500000	0.752951	0.986063	1.5172	1.62667	2.64774	1.91082	1.5427	1.16775	2.54382	3.74208	2.93448	2.64927	0.879078	1.3273	0.235111	NaN	1.73215	2.27903	1.78238	1.63405	1.12284	1.74574	NaN	3.58592	2.09236	1.99691	2.04045	1.16184	1.48213	2.40948	1.05089	1.51571	1.72358	2.96454	NaN	NaN	NaN	NaN	1.62343	NaN	NaN	-2.0388	1.58952
ARL17B		+	9	78.5	191.22	3548000000	NaN	NaN	NaN	NaN	-2.75463	NaN	NaN	NaN	NaN	6.72685	7.8657	7.98791	NaN	NaN	NaN	NaN	NaN	NaN	NaN	NaN	NaN	NaN	NaN	NaN	NaN	NaN	NaN	NaN	NaN	NaN	NaN	NaN	NaN	NaN	NaN	NaN	NaN	NaN	NaN	NaN	NaN	NaN	NaN
CHERP	Calcium homeostasis endoplasmic reticulum protein		19	30.5	309.94	7231700000	3.8359	3.2412	3.2848	3.79914	3.19644	2.47448	4.15562	3.59431	2.47143	4.94394	4.71193	4.34787	3.45344	3.37522	0.946798	4.78911	4.05366	3.32087	3.82352	4.10352	2.83083	4.73109	5.22472	4.74118	5.41223	3.82354	2.85073	4.01942	3.57822	2.80844	4.8724	3.46894	0.778168	4.18606	4.68118	4.96085	4.75976	4.21016	2.07658	4.31703	4.56468	5.66895	3.55504
ANKHD1	Ankyrin repeat and KH domain-containing protein 1		1	1.9	7.9178	2763400000	3.03042	1.71009	1.44447	2.07115	1.63434	2.0865	3.50052	2.23724	1.07357	4.1187	3.26106	3.61537	1.86302	2.60233	1.20027	3.69297	3.02857	3.62191	1.44848	1.78623	1.48999	3.52537	3.83008	3.1374	4.21982	NaN	NaN	2.1637	2.15162	3.05025	2.98738	3.72186	2.71816	3.44667	3.22992	3.17587	2.77423	3.07477	3.15413	NaN	3.39585	4.31021	NaN
SRRM1	Serine/arginine repetitive matrix protein 1		2	4.9	60.042	333900000	-1.86899	NaN	-1.95183	-3.29483	-1.20109	-2.11457	-1.42425	-1.49962	-3.90165	-1.06263	1.93002	-1.98269	NaN	0.5818	NaN	-0.886976	-1.27238	-1.87383	-1.27761	1.27312	1.16081	-1.36975	1.27788	-0.776159	-0.665279	-1.28421	NaN	-1.96058	-0.495716	-2.27124	-2.2426	-1.54347	NaN	NaN	0.331198	-1.32023	-0.102932	-0.925386	NaN	-1.33152	NaN	-1.47378	-1.61904
KATNAL2	Katanin p60 ATPase-containing subunit A-like 2		1	9.4	7.1113	160650000	-2.33244	-1.62087	-2.10976	-0.631416	-1.17823	-0.827784	-1.28545	-0.993149	-0.271879	-2.95587	-2.8209	NaN	NaN	NaN	NaN	NaN	NaN	NaN	-1.20664	-2.2397	-1.84313	NaN	-3.36024	NaN	-2.17372	-2.01144	-0.913694	-0.277491	-1.774	-0.717094	NaN	NaN	-1.85573	NaN	NaN	-2.82988	-2.07719	-2.88689	NaN	-2.52129	-2.45677	NaN	0.825863
NUP93	Nuclear pore complex protein Nup93		2	2.6	13.749	50563000	NaN	NaN	NaN	-0.457087	-2.11843	NaN	-2.30705	-2.2843	-2.68919	NaN	NaN	NaN	NaN	NaN	NaN	NaN	NaN	NaN	-0.975792	-4.28849	-2.91361	-1.78275	NaN	-2.44576	NaN	NaN	-2.98764	NaN	NaN	NaN	NaN	NaN	-2.32095	NaN	NaN	NaN	NaN	NaN	NaN	NaN	NaN	NaN	NaN
HIST3H2BB	Histone H2B type 3-B		1	56.3	6.3437	127890000	NaN	-1.29194	-2.98775	NaN	-1.8217	-1.48759	-2.56016	-0.956503	-1.34383	-2.14535	-0.179859	-1.13232	NaN	-1.39879	NaN	NaN	-2.83533	NaN	NaN	-1.97765	-2.10726	NaN	-0.132023	NaN	NaN	-1.20243	0.0184708	NaN	-1.30012	-2.55466	NaN	-2.38927	-1.08931	-0.713402	NaN	-2.58802	NaN	-0.571356	-0.931919	-1.79055	-2.36979	-2.56621	-2.81581
NKAPL	NKAP-like protein		4	15.9	29.777	612740000	0.454115	0.715733	0.62961	-0.939013	-0.418665	-0.257423	0.0736828	0.0619087	-0.20645	0.181242	1.79215	0.137926	0.0725231	0.822359	-0.0125427	0.288164	1.47109	0.110426	-0.817982	0.746531	0.210375	-0.607672	0.635189	2.00828	0.379873	0.170103	-0.900623	-0.0976353	0.762207	0.23177	-1.0319	-0.592564	-0.238094	0.927246	1.22044	-0.620174	0.904102	0.98101	0.264585	0.23159	0.607334	-0.111063	-1.27216
CDKN2A	Tumor suppressor ARF;Cyclin-dependent kinase inhibitor 2A		1	22.4	6.9492	13791000	NaN	NaN	NaN	NaN	NaN	NaN	NaN	NaN	NaN	NaN	NaN	NaN	NaN	NaN	NaN	NaN	NaN	NaN	-2.60814	NaN	NaN	NaN	NaN	NaN	NaN	NaN	NaN	NaN	NaN	NaN	NaN	NaN	NaN	NaN	NaN	NaN	NaN	NaN	NaN	NaN	NaN	NaN	-3.0387
SREK1IP1	Protein SREK1IP1		6	28.4	52.335	6901600000	4.38097	2.49579	2.85932	2.94419	2.43718	2.65046	4.41124	4.39941	2.7305	4.34332	3.32214	4.18944	4.35282	3.71216	3.01383	4.25972	4.69276	4.07904	3.72105	3.48847	3.23645	4.52601	4.91582	4.63431	4.86796	4.0002	3.55798	3.31188	3.21939	3.93771	3.77744	4.70623	3.87455	4.40851	4.44803	4.80446	4.36951	4.53205	4.59532	4.2409	4.75357	6.00461	3.6172
PRPF38A	Pre-mRNA-splicing factor 38A		11	35.6	139.34	6380400000	4.04263	4.2062	4.39733	2.63594	3.2949	3.22099	3.19159	2.79455	2.63238	4.44187	4.48747	5.07413	1.74813	3.71893	2.78157	4.55893	4.3428	4.35126	2.86879	3.06707	3.01259	4.09129	3.92791	4.93729	3.47919	3.64564	3.46227	3.43829	3.73035	3.88578	4.05846	3.79397	2.92106	4.59337	4.38504	3.27366	4.08306	4.62066	3.85797	4.2968	4.39572	3.57487	2.17813
COLGALT1	Procollagen galactosyltransferase 1		1	4.6	6.6032	16453000	NaN	NaN	NaN	-2.80894	-2.26542	-2.21086	NaN	NaN	NaN	NaN	NaN	NaN	NaN	NaN	NaN	NaN	NaN	NaN	NaN	NaN	NaN	NaN	NaN	NaN	NaN	NaN	NaN	-2.31205	NaN	NaN	NaN	NaN	-2.04564	NaN	NaN	NaN	NaN	NaN	NaN	NaN	NaN	NaN	NaN
TXNDC5	Thioredoxin domain-containing protein 5		3	14.2	25.472	141820000	-1.69024	NaN	-2.36406	-1.87724	-2.18481	-1.80685	-1.23344	-2.16691	-1.93745	-1.29379	-1.92447	-1.96531	NaN	NaN	NaN	-1.83303	-1.64921	NaN	-1.85423	-2.15237	-2.27339	-0.968834	-3.01729	-1.79372	-1.14771	-2.17871	-1.33308	-2.50718	-2.24806	-1.47903	-2.41402	-1.71828	-2.2425	-0.781418	-1.94143	-1.56357	-1.55238	-2.1794	-2.21076	-1.5637	-1.06671	-1.16831	-1.9026
SERBP1	Plasminogen activator inhibitor 1 RNA-binding protein		3	11.4	84.627	460120000	0.363445	-0.178686	0.248411	0.542591	-1.63666	NaN	0.473829	0.767094	-0.485531	1.26217	0.459047	0.178156	0.0155029	-0.58423	NaN	1.19362	0.57729	0.291162	-0.01791	-0.640167	-1.22194	0.810507	0.496208	1.02733	1.50119	0.249971	NaN	0.000947952	-0.756132	-0.335028	0.497438	0.465809	0.199776	NaN	0.512115	0.810179	0.635311	1.22221	0.114319	0.0988216	0.419535	0.837723	0.0102692
MAPK1IP1L	MAPK-interacting and spindle-stabilizing protein-like		1	6.9	24.212	76597000	NaN	NaN	NaN	-0.879585	-1.70802	-1.87172	NaN	NaN	NaN	NaN	-0.846859	NaN	NaN	NaN	NaN	-0.721561	NaN	-1.39234	NaN	NaN	NaN	-0.869764	-1.19393	-0.606304	-0.50219	NaN	-1.93347	NaN	-1.33199	NaN	NaN	NaN	NaN	NaN	-0.904547	0.0824375	NaN	NaN	NaN	NaN	-0.310345	NaN	-2.50897
TDRD9	Putative ATP-dependent RNA helicase TDRD9		1	2.6	6.4451	1784900000	NaN	NaN	NaN	NaN	2.63992	NaN	NaN	NaN	NaN	NaN	4.40399	4.2843	NaN	NaN	NaN	NaN	NaN	2.53968	NaN	NaN	NaN	NaN	4.74574	NaN	0.688536	3.8169	2.11847	NaN	NaN	NaN	NaN	NaN	NaN	6.28306	0.766975	NaN	NaN	NaN	NaN	4.40001	1.59448	NaN	NaN
ABCF1	ATP-binding cassette sub-family F member 1		7	9.8	57.581	801390000	1.0685	0.110075	0.0888309	0	0.373247	-0.373127	0.136742	0.120394	-0.419565	0.959646	2.47077	1.5127	0.12018	1.49132	-0.0981941	1.06911	1.22208	0.950502	0.235464	0.0233955	0.270119	1.02067	1.73251	1.04339	0.702364	1.49609	0.695415	-0.325068	0.644196	0.810759	-0.612202	-0.372635	-0.149229	0.845474	0.969202	0.582121	0.890583	1.24557	0.532837	0.437567	1.16653	0.0261154	-0.750792
BOD1L1	Biorientation of chromosomes in cell division protein 1-like 1		1	0.4	6.8835	15851000	NaN	NaN	NaN	NaN	NaN	NaN	NaN	NaN	NaN	NaN	-1.41906	NaN	NaN	-1.84695	NaN	NaN	NaN	NaN	NaN	NaN	NaN	NaN	-0.881853	NaN	NaN	-1.9369	NaN	NaN	-2.87082	NaN	NaN	NaN	NaN	NaN	NaN	NaN	-2.76706	NaN	-3.08264	NaN	NaN	NaN	NaN
NUP43	Nucleoporin Nup43		1	4.5	7.2594	24909000	-2.58591	-2.19667	-1.5363	NaN	NaN	-0.463665	-2.69839	-2.41114	NaN	NaN	NaN	NaN	NaN	NaN	NaN	NaN	NaN	NaN	NaN	NaN	NaN	NaN	NaN	NaN	NaN	NaN	-1.85475	NaN	NaN	NaN	NaN	NaN	-2.446	NaN	NaN	NaN	NaN	NaN	NaN	NaN	NaN	NaN	-2.51872
THOC2	THO complex subunit 2		5	11.3	183.98	20256000000	5.60844	4.56098	4.37686	4.3884	4.29004	3.92334	6.08502	5.54721	3.55089	5.91963	6.22568	5.4587	5.38786	5.43128	3.38853	6.18015	6.03575	5.43646	4.97805	5.05092	4.76017	5.97107	6.83288	5.7945	6.75729	6.23632	5.21856	4.7783	5.14778	4.86442	5.74509	5.93498	4.2055	5.40175	6.49161	6.57133	6.02219	6.19476	5.58011	4.97141	6.05341	7.78938	4.95288
RP9	Retinitis pigmentosa 9 protein		6	27.6	54.838	1414900000	1.3835	0.626209	0.370888	0.340853	0.546419	0.118155	1.7769	0.721039	0.229445	2.06479	1.42344	2.56224	1.11247	0.51309	0.0475578	2.02869	1.43192	2.64907	0.343405	0.145954	0.962193	2.75585	2.53139	2.35906	3.37437	1.5999	2.92904	0.428862	0.890953	2.19755	0.133461	2.16266	0.759102	3.56725	2.54394	2.7622	1.63485	1.33533	0.558216	2.47567	3.17175	3.02717	1.36804
PNPT1	Polyribonucleotide nucleotidyltransferase 1, mitochondrial		2	3.3	23.319	14719000	NaN	NaN	NaN	NaN	-2.32315	-2.91008	NaN	NaN	NaN	NaN	NaN	NaN	NaN	NaN	NaN	NaN	NaN	NaN	NaN	NaN	NaN	NaN	NaN	NaN	NaN	NaN	NaN	NaN	NaN	NaN	NaN	NaN	NaN	NaN	NaN	NaN	NaN	NaN	NaN	NaN	NaN	NaN	NaN
HM13	Minor histocompatibility antigen H13		1	9.8	6.9588	14649000	NaN	NaN	NaN	-1.77016	-2.44992	-2.11473	NaN	NaN	NaN	NaN	NaN	NaN	NaN	NaN	NaN	NaN	NaN	NaN	NaN	NaN	NaN	NaN	NaN	NaN	NaN	-1.02302	-1.97849	NaN	NaN	NaN	NaN	NaN	NaN	NaN	NaN	NaN	NaN	NaN	NaN	NaN	NaN	NaN	NaN
BRIX1	Ribosome biogenesis protein BRX1 homolog		1	3.7	7.5907	26445000	NaN	NaN	NaN	NaN	-1.89226	-2.71859	NaN	NaN	NaN	NaN	NaN	NaN	NaN	-2.67328	NaN	NaN	NaN	NaN	NaN	NaN	NaN	NaN	NaN	NaN	NaN	NaN	NaN	NaN	-2.53372	-2.59886	-2.83697	NaN	NaN	NaN	NaN	NaN	NaN	NaN	NaN	NaN	NaN	NaN	NaN
PPIL4	Peptidyl-prolyl cis-trans isomerase-like 4		15	38.8	235.06	3531700000	2.04809	3.13837	3.53175	2.19375	2.74192	3.04395	1.90618	2.07493	1.46299	3.32953	3.96173	4.10725	0.701302	3.48003	1.46097	3.75547	3.67178	3.6524	1.25874	2.56694	2.64475	2.81581	3.45576	3.94787	2.23937	2.48739	2.86985	2.41606	3.44321	3.08506	2.6212	2.31717	1.33692	4.28136	3.42792	2.71443	2.80496	4.01566	2.97179	3.57502	3.49854	2.46408	1.75805
TMEM263	Transmembrane protein 263		5	68.1	106.02	1683500000	-0.125872	1.07742	2.66291	2.43974	-0.129517	2.06554	1.43086	1.15083	-0.641567	2.2996	0.807323	2.98914	0.656803	0.834181	1.56864	1.92999	2.38564	1.54448	2.57379	0.142866	1.66164	2.42522	0.67556	2.96549	3.17147	1.06374	0.437723	1.86481	2.51027	2.29317	NaN	2.84896	2.17581	0.944035	3.63832	1.11464	1.65506	2.49951	0.786695	0.244007	3.37467	1.90553	1.78307
SNRNP27	U4/U6.U5 small nuclear ribonucleoprotein 27 kDa protein		10	37.4	192.46	16246000000	5.13263	4.61826	5.09697	4.58622	3.82829	3.8357	5.67146	4.63294	3.66855	6.16342	5.01172	5.38083	5.13344	4.42344	3.72122	5.79886	5.33548	5.23319	4.90394	4.16817	4.41006	5.50016	5.15033	5.95495	6.41514	4.57357	4.07294	5.38125	4.4015	4.33512	6.05972	5.18523	3.94738	5.31516	5.39094	6.43534	6.35148	5.58595	4.39638	5.09308	5.75718	6.48819	4.15371
H3BRB0			2	5.5	13.665	369610000	-0.0159168	-1.30655	-1.3553	-1.43408	-1.60285	-1.95451	0.277969	-0.198105	-1.54387	-0.191736	0.599649	-0.104315	0.572681	-0.283684	-1.06294	-0.501844	-0.203415	-0.506643	-0.652302	-0.8596	-1.81277	0.4219	0.788729	-0.274858	0.548401	0.435442	-0.694996	-0.717678	-0.55649	-0.384184	0.0288219	-0.115612	-0.990446	-0.0158176	0.102415	0.794889	1.10937	-0.238075	-0.236563	0.386669	0.583977	0.480406	-1.10765
SREK1	Splicing regulatory glutamine/lysine-rich protein 1		10	28.2	137.01	1943900000	0.980419	2.08863	0.880814	0.731789	1.86879	1.49264	1.71677	0.646759	0	2.48581	3.02752	2.61976	1.19621	1.32118	0.0282993	2.5524	2.62825	1.78229	1.85256	2.09666	2.69424	2.0118	2.62376	2.54869	2.48984	2.13302	1.69838	1.6795	2.5609	1.67377	2.52312	1.0326	0.421072	1.89005	2.64104	2.23845	1.76009	1.95493	1.46841	1.03096	2.57556	2.50821	0.644251
SRSF12	Serine/arginine-rich splicing factor 12		3	24.5	19.25	254110000	-1.75259	-1.12505	-2.12293	-1.49735	-0.51614	-2.3351	-1.21676	-2.41173	NaN	-0.620567	1.17434	-0.626122	NaN	NaN	NaN	-0.81208	-0.52351	-1.03914	-0.778982	0.444372	0.903091	NaN	-0.559116	-0.687012	-0.469385	NaN	NaN	-1.11644	-1.12441	-1.24831	-1.74578	NaN	NaN	NaN	-0.44231	-0.226704	-1.24451	-1.43076	-0.939449	-1.69909	-0.900877	-0.884481	-1.52428
DDX1	ATP-dependent RNA helicase DDX1		6	16.5	50.596	293860000	-1.26616	-1.05783	-0.568029	0.0115128	0.909927	0.800148	-0.911444	-0.635509	0.154696	NaN	NaN	NaN	NaN	NaN	NaN	NaN	NaN	NaN	-1.37846	NaN	-0.0619907	NaN	NaN	NaN	NaN	-1.03666	NaN	-0.169476	-0.306576	-0.620634	NaN	NaN	-0.37241	NaN	NaN	NaN	NaN	NaN	NaN	NaN	NaN	NaN	0.717337
H1FX	Histone H1x		11	45.1	114.01	3497200000	2.22663	2.60914	3.19149	2.34625	2.17087	2.79656	3.25458	2.15983	2.34076	3.94091	3.88698	4.80243	1.03459	2.16277	0.624922	3.81658	3.27236	3.69587	1.9401	1.87313	2.76563	3.36066	2.91053	4.45278	3.53341	2.80876	4.13053	2.4198	2.4694	3.0695	3.12469	1.97647	2.41011	3.53556	3.39178	3.07951	3.95153	3.65718	3.27554	2.88455	3.76716	3.01977	1.70177
PSMF1	Proteasome inhibitor PI31 subunit		1	9.3	31.702	97922000	NaN	NaN	NaN	NaN	-1.04549	0.15946	NaN	0.144535	0.441868	NaN	NaN	NaN	NaN	NaN	NaN	NaN	NaN	NaN	-1.86223	-1.42866	-1.59696	NaN	NaN	NaN	NaN	NaN	NaN	-1.41814	NaN	NaN	NaN	NaN	-2.83579	NaN	NaN	NaN	NaN	NaN	NaN	NaN	NaN	NaN	NaN
AP3S1	AP-3 complex subunit sigma-1		3	22.8	22.48	56151000	NaN	NaN	NaN	-2.36487	-2.93435	-2.6548	-2.88061	-2.85833	-2.09254	NaN	NaN	NaN	NaN	NaN	NaN	NaN	NaN	NaN	-4.40941	-4.13107	-4.42032	NaN	NaN	NaN	NaN	NaN	NaN	NaN	-3.15895	-2.38988	NaN	NaN	NaN	NaN	NaN	NaN	NaN	NaN	NaN	NaN	NaN	NaN	-0.0610104
PHF3	PHD finger protein 3		1	0.6	7.9885	133230000	-1.81763	-1.86128	-1.45122	-2.09346	-2.63658	-2.58376	-1.59586	NaN	NaN	-0.993582	0.176407	-1.41869	NaN	NaN	NaN	-1.9469	-1.17199	-1.51265	-2.17809	-1.47703	NaN	-2.02287	-0.143396	-0.711475	-1.45192	-1.18807	-2.03297	-1.73217	-0.663761	NaN	NaN	NaN	NaN	-1.53211	-0.482073	-1.40113	0.0341244	NaN	NaN	-2.17588	-1.01707	-1.10654	-2.66702
ARPC1A	Actin-related protein 2/3 complex subunit 1A		2	10.4	11.884	53815000	NaN	-1.99174	NaN	NaN	-1.40032	-1.68235	NaN	NaN	NaN	NaN	NaN	NaN	NaN	NaN	NaN	NaN	NaN	NaN	NaN	NaN	NaN	NaN	NaN	NaN	NaN	NaN	NaN	NaN	-1.96025	NaN	NaN	NaN	NaN	NaN	NaN	NaN	NaN	NaN	NaN	NaN	NaN	NaN	NaN
DDX17	Probable ATP-dependent RNA helicase DDX17		5	14.9	62.851	511070000	-0.347317	0.123951	0.407808	0.170721	-0.0324783	-0.598166	-0.0712852	-0.471619	-0.191208	-0.361231	0.125223	-0.69993	-0.348993	-1.16534	NaN	-1.24747	-0.408737	NaN	0.154535	-0.0298195	-0.543806	-1.38359	-0.749546	-0.808826	-1.03515	-0.113941	1.1182	-0.169937	-0.49543	-0.29624	-0.731249	-0.131165	0.0166645	-0.640308	-0.118189	-0.704948	0.236959	-0.424793	-1.01669	-0.00704575	-0.334656	-0.572407	0.39106
RAD50	DNA repair protein RAD50		1	2.7	6.3595	10048000	NaN	NaN	NaN	NaN	-3.48903	NaN	NaN	NaN	NaN	NaN	NaN	NaN	NaN	NaN	NaN	NaN	NaN	NaN	NaN	NaN	NaN	NaN	NaN	NaN	NaN	NaN	NaN	NaN	NaN	NaN	NaN	NaN	NaN	-1.98557	NaN	NaN	NaN	NaN	NaN	NaN	NaN	NaN	NaN
UFD1L	Ubiquitin fusion degradation protein 1 homolog		3	12.4	18.397	56214000	NaN	NaN	-1.28733	NaN	-1.92739	-1.24799	NaN	-1.52018	-1.30747	NaN	NaN	NaN	NaN	NaN	NaN	NaN	NaN	NaN	-2.30191	NaN	NaN	NaN	NaN	NaN	NaN	NaN	NaN	NaN	NaN	NaN	NaN	NaN	NaN	NaN	NaN	NaN	NaN	NaN	NaN	NaN	NaN	NaN	-2.37435
KHSRP	Far upstream element-binding protein 2		3	5.2	17.382	65670000	-2.87831	-2.43679	NaN	-2.66313	-3.05839	-2.83239	-2.50553	-2.16561	-2.29821	-2.80195	NaN	NaN	NaN	NaN	NaN	-3.01518	NaN	NaN	-3.15305	-2.39082	NaN	NaN	NaN	NaN	NaN	-2.39353	-2.26694	NaN	-2.59436	-2.52975	NaN	NaN	NaN	-1.91018	-1.04573	NaN	-1.25939	NaN	-3.1353	NaN	NaN	-2.66852	-2.02908
EMG1	Ribosomal RNA small subunit methyltransferase NEP1		2	12.3	17.492	56306000	NaN	NaN	-2.75713	NaN	NaN	NaN	NaN	-1.30315	NaN	NaN	NaN	NaN	NaN	NaN	NaN	NaN	NaN	NaN	-2.31662	-2.84963	NaN	NaN	NaN	NaN	NaN	NaN	-2.17965	NaN	NaN	NaN	NaN	NaN	-2.31592	NaN	NaN	NaN	NaN	NaN	NaN	NaN	NaN	NaN	NaN
MYDGF	Myeloid-derived growth factor		3	34.5	21.885	147040000	-1.81101	-1.89048	-0.674137	-1.08604	-0.137833	-0.79525	NaN	NaN	-2.07255	-1.66691	-1.44728	NaN	NaN	-2.78499	NaN	NaN	NaN	NaN	-2.09851	-0.513386	NaN	NaN	NaN	NaN	NaN	NaN	-1.32403	NaN	-0.510906	-0.771511	NaN	NaN	NaN	-1.32584	NaN	NaN	NaN	NaN	NaN	NaN	NaN	NaN	-2.42299
MAGOH	Protein mago nashi homolog		3	47.8	30.55	179520000	-0.319292	NaN	-0.633516	-0.0937271	-0.690994	0.184193	NaN	NaN	-1.48725	0.153198	NaN	NaN	NaN	NaN	NaN	NaN	NaN	NaN	-1.16935	NaN	NaN	NaN	NaN	NaN	NaN	NaN	-0.780149	-0.952375	-1.35155	-0.162632	NaN	NaN	-0.43284	NaN	-1.93472	-0.572128	NaN	NaN	NaN	NaN	NaN	0.0800095	-1.52905
ARL8A	ADP-ribosylation factor-like protein 8A		1	7.5	13.922	62752000	NaN	NaN	-2.75626	-1.88346	-1.86096	-2.38865	NaN	-2.03678	-2.21348	NaN	NaN	NaN	NaN	NaN	NaN	NaN	NaN	NaN	-2.50278	-2.14616	-2.42405	NaN	NaN	NaN	NaN	NaN	NaN	-2.35448	-2.85556	-2.1406	NaN	NaN	NaN	NaN	NaN	NaN	NaN	NaN	NaN	NaN	NaN	NaN	NaN
CCDC124	Coiled-coil domain-containing protein 124		8	31.4	52.391	1383900000	0.794771	2.6293	0.798468	0.152626	1.16	1.1809	0.830824	0.238152	1.30277	1.96569	2.90701	2.76453	0.487459	1.95469	1.81479	1.41689	1.30055	2.2949	0.441074	1.17044	1.34481	1.50855	3.25765	3.66032	1.40552	0.35611	2.43913	0.42345	1.92736	1.30545	0.0435829	1.52041	1.23522	3.3603	0.608957	1.33559	1.57351	2.61218	1.49397	2.96207	1.3709	1.23879	-0.160719
SNRNP40	U5 small nuclear ribonucleoprotein 40 kDa protein		4	21.3	76.622	79030000	NaN	NaN	NaN	NaN	-1.08716	-1.2385	NaN	NaN	-1.86752	NaN	NaN	NaN	NaN	NaN	NaN	NaN	NaN	NaN	-1.65903	NaN	NaN	NaN	NaN	NaN	NaN	NaN	-1.75403	-2.13756	NaN	NaN	NaN	NaN	NaN	NaN	NaN	NaN	NaN	NaN	NaN	NaN	NaN	NaN	-1.97742
LTV1	Protein LTV1 homolog		1	2.3	7.0068	308430000	NaN	-0.112614	NaN	-1.94263	-1.50796	-1.44894	-0.848455	-0.163897	-0.994104	-0.367949	1.30857	-0.149271	-1.59432	-1.49004	-1.74631	NaN	-0.172451	-0.0216618	NaN	NaN	0.850155	-0.339149	0.919132	0.988304	0.240639	-0.149893	-0.175737	-0.876801	-0.131014	-0.54418	-0.164068	0.217773	-1.08385	0.227551	0.592196	-0.0904522	1.18521	-0.0494213	-1.25164	0.442039	0.922924	0.139507	-1.66221
PGAM5	Serine/threonine-protein phosphatase PGAM5, mitochondrial		2	9.4	12.811	144250000	NaN	-1.87859	NaN	-1.87198	-0.467752	-1.53048	NaN	-0.896955	-0.396862	NaN	NaN	NaN	NaN	NaN	NaN	NaN	NaN	NaN	-1.45637	NaN	-1.5086	-1.86322	NaN	NaN	NaN	NaN	-1.11174	NaN	-1.9126	-1.96374	NaN	NaN	NaN	-1.49123	-1.43851	NaN	NaN	NaN	NaN	NaN	NaN	NaN	-2.09654
RSRC1	Serine/Arginine-related protein 53		5	30.4	51.631	1177600000	0.189079	1.14094	1.47704	2.1201	0.702641	0.900457	1.08856	-0.514008	-0.696959	2.64141	1.24403	2.91901	0.278811	-0.454723	-0.889763	3.16797	1.79505	1.6165	0.832575	0.239758	1.05079	2.24822	1.14803	2.67846	3.13051	0.483105	0.533709	2.02777	1.55683	1.85683	0.268366	0.0587215	0.106583	1.90986	2.27444	2.26406	2.13734	0.847797	0.346983	2.05757	1.96907	2.88282	0.596182
RBM14	RNA-binding protein 14		3	5.8	20.934	67022000	-1.61056	-2.21943	-2.1018	NaN	-1.83078	-1.70458	NaN	-2.42782	-3.15455	NaN	NaN	NaN	NaN	NaN	NaN	NaN	NaN	NaN	NaN	NaN	NaN	NaN	NaN	NaN	NaN	NaN	NaN	NaN	-1.5162	NaN	NaN	NaN	NaN	NaN	NaN	NaN	NaN	NaN	NaN	-0.885675	NaN	NaN	NaN
PPP1R10	Serine/threonine-protein phosphatase 1 regulatory subunit 10		1	2	7.2308	50561000	-1.21217	-2.18291	NaN	NaN	-3.34353	NaN	-2.52633	-2.76077	-4.28226	-2.94811	-1.52944	NaN	NaN	-2.61644	NaN	NaN	NaN	NaN	-3.10047	-2.03867	-4.40361	NaN	NaN	NaN	NaN	NaN	NaN	NaN	-3.99352	NaN	-1.76289	-1.88756	NaN	NaN	-1.89433	NaN	-2.05468	-1.50016	NaN	NaN	-4.84349	NaN	NaN
MCCC1	Methylcrotonoyl-CoA carboxylase subunit alpha, mitochondrial		17	32.6	213	4485900000	3.43907	3.28655	4.15514	2.0886	2.95022	3.0229	3.14069	3.06305	2.30036	3.9971	3.93212	4.60304	0.37561	3.00904	1.84125	3.79473	3.43831	3.45443	2.24706	3.61904	3.2611	3.21047	3.90315	3.56233	2.98201	3.28212	3.1215	3.23227	3.17199	3.41056	3.67696	3.26594	2.38211	3.84872	3.78551	3.11152	3.69195	3.79454	2.80468	2.96465	3.91957	3.95524	1.88503
RBM15	Putative RNA-binding protein 15		2	4.1	15.807	83882000	NaN	NaN	-2.45018	NaN	-2.24073	-2.46414	-2.55893	-2.2176	-0.702332	NaN	-1.58662	-2.49999	NaN	NaN	NaN	NaN	NaN	NaN	-2.52838	-2.9366	-3.24128	NaN	-0.593655	NaN	NaN	-2.7606	-2.03873	NaN	-2.9486	-2.18011	NaN	NaN	-3.07576	NaN	-2.37143	NaN	NaN	NaN	NaN	NaN	NaN	NaN	-2.13503
TBCB	Tubulin-folding cofactor B		5	31.8	38.018	213270000	-0.0968399	-1.17599	-1.1863	-0.314064	-0.821688	-0.605322	-1.71785	-1.391	-1.38546	NaN	NaN	NaN	NaN	NaN	NaN	NaN	NaN	NaN	1.07207	-1.68344	-1.41562	-1.76943	NaN	-1.15365	NaN	-1.4867	-1.02098	-0.978979	-2.72215	-1.56459	NaN	NaN	-1.00011	-1.54281	NaN	NaN	NaN	NaN	NaN	-1.75504	-2.22572	NaN	0.0647736
PARK7	Protein deglycase DJ-1		3	23.1	22.158	193390000	0.165352	NaN	-1.29222	-0.973413	-1.2906	-0.783165	-0.580723	-0.453318	-0.798355	-1.18202	NaN	NaN	NaN	NaN	NaN	NaN	NaN	NaN	-0.932087	NaN	NaN	-1.76162	NaN	NaN	-0.971743	-1.03038	-0.979044	-0.0556755	-0.706139	-0.798695	NaN	NaN	-1.24457	NaN	NaN	NaN	-1.49941	-2.20778	NaN	NaN	NaN	NaN	1.21518
PHB2	Prohibitin-2		13	53	148.94	1359200000	2.58758	1.77476	2.34139	1.9273	3.01334	2.75822	1.53568	2.00673	1.74981	-0.540239	-0.319773	-0.803873	NaN	-1.65614	NaN	NaN	-1.08822	NaN	1.27477	-0.0190983	0.68367	0.449413	-0.0161438	-0.426086	-0.753521	1.56148	1.60634	1.88242	1.78953	1.30209	-2.23767	0.668934	2.09028	0.069828	-0.165361	-0.817312	-1.09424	-2.33005	NaN	NaN	-0.578209	NaN	1.87444
CHP1	Calcineurin B homologous protein 1	+	24	90.3	323.31	69571000000	NaN	NaN	NaN	NaN	NaN	NaN	NaN	NaN	-6.81966	NaN	NaN	NaN	NaN	NaN	NaN	14.0984	12.9723	12.7985	NaN	NaN	NaN	NaN	-2.499	NaN	NaN	NaN	NaN	NaN	NaN	NaN	NaN	NaN	NaN	NaN	NaN	NaN	NaN	NaN	-5.31913	NaN	NaN	NaN	NaN
HSD17B10	3-hydroxyacyl-CoA dehydrogenase type-2		11	58.6	301.39	2102600000	0.221886	1.40601	2.92952	2.81227	3.68136	3.5488	1.49548	2.93106	2.91577	-0.961355	-0.0456562	-0.415152	NaN	-2.23297	NaN	-1.47162	-2.04731	NaN	0.582989	1.05869	0.829582	-1.22646	-1.64759	-0.872646	-0.93379	0.402029	1.68206	2.35631	2.7837	1.72122	-0.757381	-0.520884	1.70188	-0.420891	-1.10829	-1.41782	0.815018	0.475159	-1.54806	NaN	-1.80313	-1.6829	2.68132
HNRNPAB	Heterogeneous nuclear ribonucleoprotein A/B		5	27.7	53.878	220820000	-0.802229	-1.26856	-2.77262	-1.4224	-1.87107	-1.26509	-1.25231	-0.927233	0.179237	NaN	-1.28122	-1.29576	NaN	NaN	NaN	NaN	NaN	-1.30977	-0.960596	-1.06754	-1.01342	-1.35167	NaN	-1.83783	-1.41815	NaN	-0.34486	-0.939453	NaN	-0.417128	NaN	NaN	-1.77774	-1.95223	-0.11079	0.206314	-0.347441	-1.21064	-1.45304	-2.24843	-1.2124	NaN	0.581728
ACO2	Aconitate hydratase, mitochondrial		5	11.4	62.341	191910000	-0.857285	-0.882755	-0.864717	-0.627935	0.0267792	0.832743	-1.66472	-1.40487	0.215307	NaN	NaN	-0.635498	NaN	NaN	NaN	-1.02317	NaN	NaN	-2.10524	-1.29448	NaN	NaN	NaN	NaN	-0.455591	-0.947029	-1.25551	0.0341339	NaN	-0.52602	NaN	NaN	-0.642138	NaN	NaN	NaN	NaN	NaN	NaN	NaN	NaN	NaN	0.840885
CCT7	T-complex protein 1 subunit eta		17	44.8	182.64	1429000000	1.1554	0.647312	1.76087	2.08293	3.24475	3.14521	1.20131	1.56145	3.11885	-0.397251	-1.57346	-3.00374	NaN	NaN	NaN	0.0207329	-1.61596	NaN	2.51935	-1.19271	0.165577	0.494293	-0.673691	-0.44742	0.236353	0.515543	1.23558	1.87783	1.36271	1.4073	NaN	0.385393	2.731	0.101822	-1.06652	NaN	0.360359	-1.12538	NaN	-1.18213	-1.58385	-0.225092	2.98032
EBNA1BP2	Probable rRNA-processing protein EBP2		2	8.8	14.114	36869000	NaN	-2.842	NaN	NaN	-3.79756	NaN	NaN	NaN	NaN	NaN	-2.70484	-3.31059	NaN	-3.89537	NaN	NaN	NaN	-3.7857	NaN	NaN	NaN	NaN	-3.4635	-3.06906	NaN	NaN	-3.83782	NaN	-3.61313	NaN	NaN	NaN	NaN	NaN	NaN	NaN	NaN	NaN	NaN	-3.84118	NaN	NaN	NaN
PRMT1	Protein arginine N-methyltransferase 1		11	43.1	110.88	1265200000	0.515858	1.39882	2.03635	1.96731	2.75661	3.05345	0.0953503	0.806948	0.967087	-0.50556	-1.42028	0.0173893	NaN	NaN	NaN	-0.629484	NaN	NaN	1.7255	1.72612	2.0634	0.198139	-1.04564	-0.782854	-0.957544	0.294123	2.33408	1.50351	1.4731	1.36057	NaN	0.0376244	1.96549	-0.157215	-0.799454	-1.96701	NaN	NaN	NaN	NaN	-1.41417	NaN	1.11351
ELAC2	Zinc phosphodiesterase ELAC protein 2		2	5.1	11.113	15721000	NaN	NaN	NaN	NaN	NaN	NaN	NaN	NaN	NaN	NaN	NaN	NaN	NaN	NaN	NaN	NaN	NaN	NaN	NaN	NaN	NaN	NaN	NaN	NaN	NaN	NaN	NaN	NaN	NaN	-1.82736	NaN	NaN	NaN	NaN	NaN	NaN	-0.365259	NaN	NaN	NaN	NaN	NaN	-0.871592
WDR77	Methylosome protein 50		2	12.9	11.633	35912000	NaN	NaN	NaN	NaN	-1.04169	-1.63827	NaN	NaN	NaN	NaN	NaN	NaN	NaN	NaN	NaN	NaN	NaN	NaN	NaN	NaN	NaN	NaN	NaN	NaN	NaN	NaN	NaN	-1.0808	NaN	NaN	NaN	NaN	NaN	NaN	NaN	NaN	NaN	NaN	NaN	NaN	NaN	NaN	-0.936157
TUBA1C	Tubulin alpha-1C chain		2	54.1	131.06	711950000	NaN	NaN	0.362942	0.512327	1.48072	1.6405	-0.518353	-0.245686	1.05012	NaN	NaN	-0.672579	NaN	0.568073	NaN	-0.277918	-1.438	NaN	0.231098	NaN	-0.446051	-0.694111	-1.01073	NaN	0.152674	-0.46841	0.711708	1.62651	1.80148	1.6975	NaN	NaN	0.235218	1.17704	1.45002	-0.695723	-0.0590267	-0.825422	NaN	NaN	-0.407141	NaN	2.74436
CPPED1	Serine/threonine-protein phosphatase CPPED1		1	9	6.6564	13472000	NaN	NaN	NaN	-2.93071	-3.49284	-2.91845	NaN	NaN	-2.31912	NaN	NaN	NaN	NaN	NaN	NaN	NaN	NaN	NaN	-2.79907	NaN	NaN	NaN	NaN	NaN	NaN	NaN	NaN	NaN	NaN	NaN	NaN	NaN	NaN	-3.08952	NaN	NaN	NaN	NaN	NaN	NaN	NaN	NaN	NaN
SRSF8	Serine/arginine-rich splicing factor 8		3	22.9	57.894	119770000	NaN	-2.23904	NaN	NaN	NaN	NaN	NaN	NaN	NaN	NaN	-1.38792	-1.71916	NaN	NaN	NaN	NaN	NaN	NaN	-1.32732	1.13478	-1.62275	NaN	NaN	NaN	-2.10015	NaN	-1.65388	NaN	-2.75637	NaN	NaN	NaN	NaN	NaN	-1.82108	-2.17622	NaN	NaN	NaN	-1.90034	NaN	-1.79874	-2.45225
AIFM2	Apoptosis-inducing factor 2	+	38	76.4	323.31	154000000000	NaN	NaN	NaN	10.764	11.0731	11.787	NaN	NaN	NaN	-6.66498	NaN	NaN	NaN	NaN	-9.31524	NaN	-6.86111	-7.15217	NaN	NaN	NaN	NaN	NaN	-7.06779	NaN	NaN	-9.66577	-7.06913	-10.1206	-9.73027	NaN	-7.54576	NaN	NaN	-8.84082	NaN	NaN	NaN	NaN	-7.706	-6.53884	-6.71471	-9.7363
LLPH	Protein LLP homolog		3	29.5	27.745	510340000	NaN	0.586826	0.657452	-0.282867	0.239067	-0.710938	NaN	-1.30699	NaN	1.39796	1.07928	1.65029	NaN	NaN	NaN	2.38405	0.688728	0.752308	-0.701075	NaN	NaN	1.29805	1.04658	2.23289	1.2256	-0.792479	0.473391	0.433533	0.947063	-0.913797	NaN	NaN	NaN	0.575548	0.367378	0.594534	NaN	NaN	NaN	0.347357	1.18309	0.514801	-0.789177
ESYT1	Extended synaptotagmin-1		4	5.3	36.795	92500000	NaN	NaN	NaN	-1.34808	-1.0552	-1.7624	NaN	-1.80648	-1.67155	NaN	NaN	NaN	NaN	NaN	NaN	NaN	NaN	NaN	-1.52896	-1.96726	-2.43795	NaN	NaN	NaN	NaN	NaN	NaN	-2.1254	NaN	-1.8577	NaN	NaN	-2.2442	NaN	NaN	NaN	NaN	NaN	NaN	NaN	NaN	NaN	-1.76057
PSMG3	Proteasome assembly chaperone 3		1	19.7	6.3454	15589000	NaN	NaN	NaN	NaN	NaN	NaN	NaN	NaN	NaN	NaN	NaN	NaN	NaN	NaN	NaN	NaN	NaN	NaN	NaN	NaN	NaN	NaN	NaN	NaN	NaN	NaN	NaN	NaN	NaN	NaN	NaN	NaN	NaN	NaN	NaN	NaN	NaN	NaN	NaN	NaN	NaN	NaN	-2.33405
DIDO1	Death-inducer obliterator 1		1	0.5	7.9193	268850000	NaN	-0.720549	-0.663225	-2.41231	-1.0979	-1.70315	NaN	-1.02024	NaN	-0.66501	1.7086	-0.134335	-1.94814	-0.124422	NaN	-0.643015	0.31781	-0.507854	-1.85283	-0.977497	NaN	-0.77356	0.577505	-1.54635	NaN	0.568624	NaN	NaN	0.00603867	-1.07352	-2.26984	NaN	NaN	-1.06394	0.498825	0.0857735	NaN	NaN	NaN	-1.68665	-0.0386658	-0.104574	-1.74029
MMTAG2	Multiple myeloma tumor-associated protein 2		2	14.3	31.697	294360000	-0.789661	-0.875706	-1.24847	-1.44529	-1.25315	NaN	-0.192564	-2.06001	-2.51516	NaN	0.474979	0.0324478	-0.469366	-0.44393	NaN	0.208973	0.104704	NaN	-1.13249	-0.93574	-0.639668	-0.426502	-0.226879	NaN	0.653633	0.480942	-0.381323	NaN	NaN	NaN	-1.18649	-1.34589	-0.813368	-1.08025	NaN	0.585939	0.366171	-0.0611305	-0.0261326	NaN	1.08393	0.749741	-0.495327
HNRNPUL1	Heterogeneous nuclear ribonucleoprotein U-like protein 1		9	18.7	84.34	647450000	1.13994	0.382324	1.1861	0.495508	2.21041	1.15136	0.640411	-0.0438652	0.176983	-0.573034	-0.307037	-0.343336	NaN	NaN	NaN	-0.499767	NaN	NaN	0.71258	-1.08576	-0.391914	-0.945551	-1.47443	NaN	NaN	-0.322844	0.481804	0.215136	0.333942	0.321291	NaN	-1.44842	0.847433	NaN	NaN	NaN	NaN	NaN	NaN	NaN	NaN	NaN	0.541603
DDX23	Probable ATP-dependent RNA helicase DDX23		14	17.4	93.961	2391700000	1.74601	3.47021	3.54379	0.760386	2.07103	2.0584	1.25704	0.596296	1.78836	2.77711	3.59102	3.78198	-0.337065	2.47804	1.91549	3.47834	2.3195	3.14223	1.55865	1.40954	2.85291	1.94342	1.56279	3.55938	1.31747	1.4277	3.07353	1.46787	2.49953	2.23458	2.75825	2.07594	0.381575	2.83742	2.03951	1.10475	1.43396	3.45241	2.41153	2.00038	2.63382	0.87302	0.673353
TUBB2B	Tubulin beta-2B chain		2	64.5	165.84	938190000	0.0112915	NaN	0.266199	1.18148	2.24963	1.95062	0.105169	2.01009	3.62761	NaN	NaN	NaN	NaN	NaN	NaN	NaN	NaN	NaN	NaN	-2.17775	NaN	NaN	-0.598003	NaN	NaN	-1.42457	-0.188362	1.36362	0.211863	-0.040638	NaN	NaN	1.73796	-1.48647	NaN	NaN	NaN	NaN	NaN	NaN	NaN	NaN	3.43558
ACAT2	Acetyl-CoA acetyltransferase, cytosolic		10	50.4	136.91	554750000	1.03555	NaN	NaN	0.165134	-0.0412769	0.784468	NaN	NaN	-2.51432	-0.893795	NaN	NaN	NaN	NaN	NaN	-2.87229	NaN	NaN	-1.39782	NaN	NaN	NaN	-2.3907	-2.05922	-1.72363	-2.12729	-0.383308	0.647505	-0.523993	-0.351835	NaN	NaN	1.1305	-1.27862	-1.17038	-1.94112	-1.72265	NaN	NaN	-1.41028	-2.00277	-2.75753	3.7088
HINT2	Histidine triad nucleotide-binding protein 2, mitochondrial		1	9.8	7.5965	41426000	NaN	NaN	NaN	-2.43762	-3.62024	-2.45773	-2.09084	-1.73869	NaN	NaN	NaN	NaN	NaN	NaN	NaN	NaN	NaN	NaN	-1.96902	NaN	-2.08807	NaN	NaN	NaN	NaN	NaN	-2.05429	-2.60336	NaN	-2.02569	NaN	NaN	NaN	NaN	NaN	NaN	NaN	NaN	NaN	NaN	NaN	NaN	-1.62226
AP1M1	AP-1 complex subunit mu-1		2	6.3	13.534	31278000	NaN	NaN	NaN	NaN	NaN	NaN	NaN	NaN	-2.73619	NaN	NaN	NaN	NaN	NaN	NaN	NaN	NaN	NaN	-2.99564	NaN	NaN	NaN	NaN	NaN	NaN	NaN	-2.47368	NaN	-2.45255	-2.13688	NaN	NaN	NaN	NaN	NaN	NaN	NaN	NaN	NaN	NaN	NaN	NaN	NaN
EIF2A	Eukaryotic translation initiation factor 2A;Eukaryotic translation initiation factor 2A, N-terminally processed		3	12.7	29.077	594200000	0.245075	0.983204	0.00340271	-0.955553	0.341288	-0.00170708	-0.713675	-0.0559044	-0.955738	0.525135	1.61489	0.364382	NaN	0.938898	-1.41444	0.348099	0.877357	1.0314	-0.285137	-0.221432	-0.388058	-0.337585	0.531891	0.53207	-0.0399704	0.483955	-0.0567265	-0.627499	0.408848	0.562248	-0.206768	0.368336	-0.676826	0.731443	1.50759	0.396856	0.395071	1.14904	-0.440409	1.04842	0.959515	-0.827669	-1.02906
MRPL13	39S ribosomal protein L13, mitochondrial		1	31.9	6.3105	176790000	NaN	NaN	NaN	NaN	-1.14498	NaN	NaN	NaN	NaN	NaN	NaN	NaN	NaN	NaN	NaN	NaN	NaN	NaN	NaN	NaN	NaN	NaN	NaN	NaN	0.426653	-0.169163	0.44768	0.0232906	0.00826263	0.343555	NaN	NaN	NaN	0.508686	NaN	0.293951	NaN	NaN	NaN	0.17131	0.605196	0.570463	-0.360579
GTPBP4	Nucleolar GTP-binding protein 1;Nucleolar GTP-binding protein 1		1	8.6	6.3975	10493000	NaN	NaN	NaN	NaN	-2.24945	-3.52705	NaN	NaN	NaN	NaN	NaN	NaN	NaN	NaN	NaN	NaN	NaN	NaN	NaN	NaN	NaN	NaN	NaN	NaN	NaN	NaN	NaN	NaN	NaN	NaN	NaN	NaN	NaN	NaN	NaN	NaN	NaN	NaN	NaN	NaN	NaN	NaN	NaN
WDR33	pre-mRNA 3' end processing protein WDR33		2	2.5	13.042	32817000	-1.79576	NaN	NaN	NaN	NaN	NaN	NaN	NaN	NaN	NaN	-1.74712	NaN	NaN	-2.14781	NaN	-1.54251	-2.26369	NaN	NaN	NaN	NaN	-1.62724	0.784943	NaN	-1.95622	NaN	NaN	-2.29454	NaN	NaN	NaN	NaN	NaN	NaN	NaN	-1.84097	NaN	NaN	NaN	NaN	NaN	NaN	NaN
ILKAP	Integrin-linked kinase-associated serine/threonine phosphatase 2C		4	10.5	22.014	95269000	NaN	NaN	NaN	NaN	-2.52836	-2.0221	-0.85532	NaN	-1.47196	NaN	NaN	NaN	NaN	NaN	NaN	NaN	NaN	NaN	-2.30929	NaN	NaN	NaN	NaN	NaN	NaN	NaN	-0.884636	-1.4858	-2.38316	-1.78374	NaN	NaN	NaN	NaN	NaN	NaN	NaN	NaN	NaN	NaN	NaN	NaN	0.858356
NSRP1	Nuclear speckle splicing regulatory protein 1		5	11.7	51.068	968810000	0.954683	1.09508	-1.76871	-0.140524	0.553165	0.377172	1.06412	0.668114	-0.903439	1.01999	2.4683	1.84918	-0.209681	1.77676	NaN	0.642141	1.52996	0.237152	0.282749	0.962351	0.582668	1.57238	2.75705	1.55522	0.92635	1.97589	1.04616	-0.402891	1.37386	0.429449	NaN	NaN	0.263966	1.72006	2.12214	1.93389	2.23648	2.58535	0.606783	1.29569	0.201571	2.12517	0.146172
RAB1B	Ras-related protein Rab-1B		4	59.7	29.498	390370000	NaN	-2.07809	-0.985804	0.609459	1.18964	-0.232691	-1.14092	-0.531723	-0.183136	NaN	-1.93318	-1.67339	NaN	NaN	NaN	NaN	-2.99821	NaN	-0.221544	-0.053299	-1.02501	-1.76637	NaN	NaN	NaN	-1.91648	-0.924995	-1.5927	-0.0708828	0.785023	NaN	NaN	-1.53205	-2.40146	-2.84997	NaN	NaN	NaN	NaN	NaN	NaN	NaN	-1.8448
NUCKS1	Nuclear ubiquitous casein and cyclin-dependent kinase substrate 1		6	23.9	42.249	927340000	0.5434	3.0591	-0.210396	-0.544477	0.911783	1.73862	-0.0539837	-0.868309	1.15161	1.29236	2.76494	1.99394	-1.23739	2.12115	1.42347	0.600689	0.707966	1.99415	-0.469563	-1.58488	0.807175	1.1486	2.87408	2.4273	0.0407009	0.529055	1.28529	-0.0482426	2.07834	0.294649	-0.693821	0.0506191	0.842955	3.76809	0.501022	-0.269144	-0.288885	1.57023	0.746609	1.99083	0.363823	0.140181	NaN
PNN	Pinin		1	2.9	15.108	121860000	NaN	0.198183	NaN	NaN	-1.88803	NaN	NaN	-3.33355	-2.78038	NaN	0.848822	0.454124	NaN	-1.4632	NaN	NaN	-2.11535	-1.38331	NaN	NaN	NaN	NaN	0.198578	-0.594479	NaN	-2.33783	NaN	NaN	-1.02071	-2.30956	NaN	NaN	-2.95814	-1.11319	-1.31452	NaN	-1.7859	-1.62776	-1.48925	-1.3612	-1.59379	NaN	NaN
BOLA2	BolA-like protein 2		5	72.1	76.516	681880000	-1.02448	-1.08137	0.623339	2.1353	0.690269	0.976585	0.417835	0.151817	0.834173	-0.174835	NaN	0.290863	-2.1	-1.53783	-0.849697	-0.372757	-0.81246	-0.45713	0.893774	0.0193939	0.979435	-0.489782	-1.35661	0.311094	-1.27292	-0.580484	1.43246	0.135046	0.774046	0.748421	-1.8326	-1.62338	-0.284401	0.241062	-0.549337	-1.67757	NaN	NaN	NaN	0.122955	-1.2619	-1.28072	1.64833
RNPEP	Aminopeptidase B		5	10.6	33.703	156540000	-1.12035	-1.40944	-2.27001	-0.765205	-0.164803	0.13829	-0.749928	-1.07705	-1.14313	NaN	NaN	NaN	NaN	-2.48318	NaN	NaN	NaN	NaN	-1.87374	-2.90668	NaN	NaN	NaN	NaN	NaN	NaN	-1.11478	-0.632093	-1.527	-1.14271	NaN	-1.39978	0.220522	NaN	NaN	NaN	NaN	NaN	NaN	NaN	NaN	NaN	0.458662
RPF2	Ribosome production factor 2 homolog		1	4.2	6.8353	63247000	NaN	NaN	NaN	NaN	-1.94357	-2.69071	NaN	NaN	-3.10268	NaN	-1.3139	NaN	NaN	-2.65046	NaN	NaN	NaN	NaN	NaN	-1.29416	NaN	-4.23119	-0.372114	NaN	-3.68151	-1.93876	-2.90187	NaN	-3.09124	NaN	NaN	NaN	NaN	-2.87469	NaN	NaN	NaN	NaN	NaN	NaN	NaN	NaN	NaN
NRDE2	Protein NRDE2 homolog		1	46.5	14.404	23173000	-2.29187	NaN	NaN	NaN	NaN	NaN	-1.53215	-1.71997	NaN	NaN	NaN	NaN	-2.74564	NaN	NaN	NaN	NaN	NaN	-2.88096	NaN	NaN	-1.95626	NaN	NaN	-1.33068	NaN	NaN	-1.96434	-2.22482	NaN	NaN	NaN	NaN	NaN	NaN	NaN	NaN	NaN	NaN	NaN	NaN	NaN	NaN
HN1L	Hematological and neurological expressed 1-like protein		6	57.9	54.698	1100000000	0.470192	0.872988	0.77492	0.690966	0.637072	-0.0498791	1.45204	0.270842	-0.156078	1.96737	1.36219	1.39011	1.07978	0.389057	-0.00619698	1.8928	0.999704	1.04058	0.770807	1.18435	0.63006	1.36939	1.09329	1.45561	2.40597	1.50792	0.826643	1.39737	0.967312	0.349649	2.51786	0.971626	-1.93071	1.33449	1.99896	2.75856	1.81247	1.12054	-0.0431271	1.22291	1.88941	1.85731	0.760685
SFXN1	Sideroflexin-1		3	13	19.477	73442000	NaN	NaN	-2.30641	-0.606754	-1.84748	-1.97206	NaN	-2.30987	-2.11938	NaN	NaN	NaN	NaN	NaN	NaN	-1.68802	NaN	NaN	-2.46444	NaN	-1.99572	NaN	-1.92037	NaN	NaN	-2.70258	-1.98149	-2.56592	NaN	-2.46434	NaN	NaN	-2.14669	NaN	NaN	-1.38718	NaN	NaN	NaN	NaN	-1.9783	NaN	-0.27557
C12orf10	UPF0160 protein MYG1, mitochondrial		2	13.1	15.057	24443000	NaN	NaN	NaN	NaN	NaN	NaN	NaN	NaN	NaN	NaN	NaN	NaN	NaN	NaN	NaN	NaN	NaN	NaN	NaN	NaN	NaN	NaN	NaN	NaN	NaN	NaN	NaN	NaN	NaN	NaN	NaN	NaN	NaN	NaN	NaN	NaN	NaN	NaN	NaN	NaN	NaN	NaN	-1.1017
CACYBP	Calcyclin-binding protein		7	42.5	96.121	707010000	-1.08922	-2.23398	-0.645967	1.88813	2.59002	2.28417	-0.447439	0.559595	2.17158	-1.33256	NaN	NaN	NaN	NaN	NaN	NaN	NaN	NaN	0.613407	-0.55043	-0.10494	-1.27907	-1.33652	-1.33964	NaN	NaN	0.123774	0.0607929	1.08908	2.27886	NaN	-1.81401	-0.37788	-0.961624	NaN	NaN	NaN	NaN	NaN	NaN	NaN	NaN	0.467588
CWC22	Pre-mRNA-splicing factor CWC22 homolog		3	4.3	20.174	1537800000	1.16516	-0.114687	-1.309	0.810692	1.03118	0.937468	1.67051	0.625343	-1.75231	2.3477	2.34978	1.48345	0.777304	1.58039	NaN	1.43506	2.25528	2.0433	-0.0960102	1.4661	-0.10811	0.318651	3.02453	2.67177	3.47163	2.62846	1.32723	0.77124	2.24232	1.47487	1.55166	2.00908	-0.633238	1.07666	3.47648	3.0962	2.04656	1.97739	0.593338	2.04384	2.63898	3.5092	1.73244
ABCB9	ATP-binding cassette sub-family B member 9		1	9.6	6.5959	350110000	-0.223845	-0.435377	-0.697542	-1.06346	-0.551882	-0.228239	-0.327787	-1.01375	-1.83257	1.08383	0.890774	1.00304	-0.82181	-0.311918	-0.919195	0.682985	0.772154	0.336428	-0.841566	-0.418402	-1.48595	0.517883	0.125317	1.26635	0.548471	0.924736	-1.01351	-0.662329	0.0697079	-0.186954	-0.574299	0.132498	-1.15753	0.144699	0.756481	0.411591	NaN	NaN	NaN	0.397127	0.595984	0.197382	-1.16514
VTA1	Vacuolar protein sorting-associated protein VTA1 homolog		2	11.1	11.656	22519000	NaN	NaN	NaN	-2.22406	-2.7912	NaN	NaN	NaN	-2.36781	NaN	NaN	NaN	NaN	NaN	NaN	NaN	NaN	NaN	-2.65184	NaN	NaN	NaN	NaN	NaN	NaN	NaN	NaN	NaN	NaN	-3.2793	NaN	NaN	NaN	NaN	NaN	NaN	NaN	NaN	NaN	NaN	NaN	NaN	-2.2873
SARS2	Serine--tRNA ligase, mitochondrial		4	11.6	32.161	79274000	NaN	NaN	NaN	-2.42217	0.316673	-1.35001	NaN	NaN	NaN	NaN	NaN	NaN	NaN	NaN	NaN	NaN	NaN	NaN	NaN	NaN	-2.96502	NaN	NaN	NaN	NaN	NaN	-1.56117	-2.61734	-2.07388	NaN	NaN	NaN	NaN	-1.39021	NaN	NaN	NaN	NaN	NaN	NaN	NaN	NaN	-1.86017
EXOSC4	Exosome complex component RRP41		1	7.7	7.5078	26243000	NaN	NaN	-1.94697	NaN	NaN	-2.52749	-2.28317	-2.35729	-1.67471	NaN	NaN	NaN	NaN	NaN	NaN	NaN	NaN	NaN	-3.0607	NaN	NaN	NaN	NaN	NaN	NaN	-3.34063	-2.74796	NaN	NaN	NaN	NaN	NaN	-2.38431	NaN	NaN	NaN	NaN	NaN	NaN	NaN	NaN	NaN	NaN
LUC7L	Putative RNA-binding protein Luc7-like 1		3	31.1	18.068	36433000	-2.07901	-2.30715	NaN	NaN	-3.26315	-2.84305	NaN	-3.05183	NaN	NaN	-1.07187	-1.55369	NaN	NaN	NaN	NaN	NaN	-1.68728	-3.39349	NaN	NaN	NaN	NaN	-1.13019	NaN	-2.81422	-1.90056	-2.12187	-2.35391	-2.73254	-2.59031	NaN	-2.07328	NaN	NaN	NaN	NaN	-1.31955	NaN	NaN	NaN	NaN	-3.27273
TIGAR	Fructose-2,6-bisphosphatase TIGAR		2	11.1	13.537	35463000	NaN	NaN	NaN	NaN	-2.47194	-1.91628	NaN	NaN	-2.36073	NaN	NaN	NaN	NaN	NaN	NaN	NaN	NaN	NaN	NaN	NaN	NaN	NaN	NaN	NaN	NaN	NaN	-1.5324	-2.48293	NaN	NaN	NaN	NaN	NaN	NaN	NaN	NaN	NaN	NaN	NaN	NaN	NaN	NaN	-0.280544
DDX21	Nucleolar RNA helicase 2		17	23.8	178.37	5679000000	3.54083	3.46594	3.44762	2.488	3.06091	2.78363	2.33938	3.18677	2.84497	3.51312	4.23613	4.15639	1.32119	3.94832	2.31728	3.3005	4.73096	2.34255	2.59843	2.8953	2.91051	3.5871	4.37961	3.68853	3.16533	4.06189	4.09936	2.27992	3.68511	3.96767	3.35703	2.99244	2.75791	3.61894	4.70838	2.95457	2.90264	4.31241	4.57016	3.39958	3.84337	1.70804	1.25487
AASDHPPT	L-aminoadipate-semialdehyde dehydrogenase-phosphopantetheinyl transferase		1	4.9	12.532	40650000	NaN	NaN	NaN	-2.11875	-2.33432	-2.32649	NaN	-2.10354	-1.43469	NaN	NaN	NaN	NaN	NaN	NaN	NaN	NaN	NaN	NaN	NaN	NaN	-2.67873	NaN	NaN	NaN	NaN	NaN	NaN	-2.32159	-2.78814	NaN	NaN	NaN	-2.67932	NaN	NaN	NaN	NaN	NaN	NaN	NaN	NaN	-0.198702
OSTC	Oligosaccharyltransferase complex subunit OSTC		1	14.5	9.7764	66887000	NaN	NaN	NaN	-0.639296	0.0268764	-0.952099	NaN	NaN	NaN	NaN	NaN	NaN	NaN	NaN	NaN	NaN	NaN	NaN	NaN	NaN	NaN	NaN	NaN	NaN	NaN	NaN	-1.44133	NaN	NaN	NaN	NaN	NaN	NaN	NaN	NaN	NaN	NaN	NaN	NaN	NaN	NaN	NaN	NaN
PHPT1	14 kDa phosphohistidine phosphatase		2	25.8	23.243	418250000	NaN	-0.374487	-0.127975	0.292519	1.85948	0.757114	0.216253	0.327341	2.54041	NaN	NaN	NaN	NaN	NaN	NaN	NaN	NaN	NaN	-0.562643	-0.849367	-1.23534	NaN	NaN	NaN	NaN	NaN	0.792995	-0.288769	-1.09753	-0.0776329	NaN	NaN	0.555826	0.205751	NaN	NaN	NaN	NaN	NaN	NaN	NaN	NaN	2.41481
SMC4	Structural maintenance of chromosomes protein 4;Structural maintenance of chromosomes protein		1	0.8	7.1166	23680000	NaN	NaN	NaN	NaN	NaN	NaN	NaN	-4.59825	-2.58431	NaN	NaN	NaN	NaN	NaN	NaN	NaN	NaN	NaN	-1.77058	NaN	NaN	NaN	NaN	NaN	NaN	NaN	NaN	-3.25863	-2.80545	NaN	NaN	NaN	NaN	NaN	NaN	NaN	NaN	NaN	NaN	NaN	NaN	NaN	-3.25417
FAM49B	Protein FAM49B	+	28	86.1	323.31	27508000000	NaN	NaN	NaN	NaN	NaN	NaN	NaN	NaN	NaN	NaN	NaN	NaN	NaN	NaN	NaN	NaN	NaN	NaN	-10.848	NaN	NaN	11.4975	10.5672	6.90692	NaN	NaN	-7.17702	NaN	NaN	-6.64655	NaN	NaN	NaN	NaN	NaN	NaN	NaN	NaN	NaN	NaN	NaN	-8.04832	NaN
2011-09-01	Septin-11		4	13.2	40.534	213700000	NaN	-1.84536	-0.585297	-1.22842	0.45009	0.280966	-1.55254	-0.642065	-0.362549	NaN	-2.1409	NaN	NaN	NaN	NaN	NaN	NaN	NaN	-0.808882	NaN	-1.93956	NaN	NaN	NaN	NaN	-2.5917	-1.324	-0.528004	-1.68812	-0.802141	NaN	NaN	-1.15645	NaN	NaN	NaN	-1.96234	-1.88565	NaN	NaN	NaN	NaN	0.629147
ARGLU1	Arginine and glutamate-rich protein 1		19	41	154.6	45204000000	6.50985	5.39942	6.04985	6.18224	6.12035	5.56947	7.16067	6.52599	4.1176	7.57262	6.44863	7.28742	6.40372	6.43349	5.2036	7.36315	7.56188	6.81264	6.34195	6.36004	6.1591	7.6292	8.15453	7.42395	7.85803	6.85798	6.23418	6.11556	6.26032	6.38696	6.6293	6.17495	5.50481	7.05728	7.17419	7.79206	6.71281	6.7684	7.03212	6.48298	7.27042	8.72527	5.76851
CNTLN	Centlein		1	0.5	6.6205	1054300000	2.29411	1.49006	1.44903	NaN	NaN	1.65107	3.1933	1.39584	0.834835	3.26825	NaN	NaN	1.88589	2.26889	1.44962	4.02821	2.76987	NaN	1.52468	NaN	0.845413	NaN	NaN	NaN	3.30663	NaN	NaN	NaN	NaN	NaN	1.50332	2.22936	1.39336	3.12292	NaN	NaN	2.96822	2.19328	2.02645	NaN	NaN	NaN	NaN
CDK12	Cyclin-dependent kinase 12		2	3.7	68.013	433150000	-1.10595	-0.601522	-1.30342	-1.15321	-0.117456	-1.96569	-0.760744	-0.747007	-1.92379	-0.616198	1.88031	0.242853	NaN	-1.1309	NaN	-1.51583	-0.205263	-0.735506	-1.05245	0.223864	-1.68107	-0.7665	2.8343	-0.554695	-0.715065	1.50186	-0.725471	0.136818	0.456078	-1.5249	-2.00857	-0.327698	-1.54246	-0.638449	0.855267	-0.199408	-0.0965023	-1.04427	-0.614828	-1.15682	1.02342	0.147284	-1.95852
TECR	Very-long-chain enoyl-CoA reductase		3	36.2	17.821	68264000	NaN	NaN	-2.38952	-1.68933	-0.124996	-1.82627	NaN	NaN	NaN	NaN	NaN	NaN	NaN	NaN	NaN	NaN	NaN	NaN	NaN	NaN	NaN	NaN	-2.02894	NaN	NaN	NaN	-2.261	NaN	-2.12508	-2.11759	NaN	NaN	NaN	NaN	-2.69387	NaN	NaN	NaN	NaN	NaN	NaN	NaN	NaN
C9orf78	Uncharacterized protein C9orf78		2	6.9	14.061	271720000	-0.694527	-2.07038	-1.41389	NaN	-1.40045	NaN	0.0483627	-1.31745	NaN	0.932467	-0.756054	0.0725899	NaN	-1.23414	NaN	-0.38063	-0.423723	-0.574493	-0.6047	-1.04757	-3.58163	-0.623348	0.407339	0.413126	1.50824	-2.28174	-0.347094	0.038578	-1.20865	-1.64434	NaN	NaN	NaN	0.261524	0.00220299	1.13027	0.379692	-0.753969	NaN	-0.206926	0.378635	1.8907	-1.80026
IGF2BP1	Insulin-like growth factor 2 mRNA-binding protein 1		6	17	58.916	655260000	0.16604	0.0897064	0.152576	0.3076	1.60905	0.913553	0.856573	0.0231705	1.50241	-1.00925	-1.64051	-0.622904	NaN	-1.59515	NaN	-0.430046	-1.88842	NaN	0.944193	-0.48929	0.17638	-1.00009	-0.700541	-1.79519	-0.40819	0.489996	0.242754	0.905649	0.717873	1.2993	NaN	-0.510052	1.24259	-0.446014	-0.0800743	0.432119	-1.036	NaN	NaN	NaN	-0.986826	NaN	1.56285
MTCH1	Mitochondrial carrier homolog 1		2	5.9	10.69	35534000	NaN	NaN	NaN	NaN	-1.94587	-1.95363	NaN	NaN	-0.473537	NaN	NaN	NaN	NaN	NaN	NaN	NaN	NaN	NaN	NaN	NaN	-2.24765	NaN	NaN	NaN	NaN	NaN	-2.41446	NaN	NaN	NaN	NaN	NaN	NaN	NaN	NaN	NaN	NaN	NaN	NaN	NaN	NaN	NaN	NaN
MAT2B	Methionine adenosyltransferase 2 subunit beta		1	14.5	7.4247	37880000	NaN	NaN	NaN	-1.86977	-2.19745	-2.48627	-2.99707	-2.5355	-1.97469	NaN	NaN	NaN	NaN	NaN	NaN	NaN	NaN	NaN	NaN	NaN	NaN	NaN	NaN	NaN	NaN	NaN	NaN	-2.3711	-2.6833	-2.89616	NaN	NaN	NaN	NaN	NaN	NaN	NaN	NaN	NaN	NaN	NaN	NaN	-1.81285
CRIPT	Cysteine-rich PDZ-binding protein		2	11.9	12.478	54620000	NaN	NaN	NaN	NaN	NaN	-1.94852	NaN	-1.65462	-1.15098	NaN	NaN	-2.03734	NaN	NaN	NaN	NaN	NaN	-1.37424	NaN	NaN	NaN	NaN	NaN	1.24793	NaN	NaN	NaN	NaN	NaN	NaN	NaN	-1.41756	NaN	-0.991617	NaN	NaN	-0.524376	-1.301	NaN	-0.726585	0.150576	NaN	NaN
HACD3	Very-long-chain (3R)-3-hydroxyacyl-CoA dehydratase 3		4	12.4	44.152	99753000	NaN	NaN	NaN	-1.73557	-0.0294704	-0.40299	NaN	NaN	NaN	NaN	-2.24611	NaN	NaN	NaN	NaN	NaN	NaN	NaN	NaN	NaN	NaN	NaN	-2.00256	NaN	NaN	NaN	-3.11699	NaN	-0.0564976	-2.03952	NaN	NaN	NaN	NaN	NaN	NaN	NaN	NaN	NaN	NaN	NaN	NaN	NaN
RCC2	Protein RCC2		9	24.5	92.247	698230000	-0.880371	-0.65778	0.702694	-0.241901	1.82344	0.938684	-0.832687	-0.843813	1.7815	-1.78544	-0.695969	-0.935223	NaN	-1.97601	NaN	-1.71762	-2.43197	NaN	0.292068	-1.07881	-1.24846	-0.127018	-0.484968	NaN	NaN	-1.075	0.557705	-1.11168	0.691351	1.11876	NaN	-0.516325	-0.210402	NaN	-1.11244	NaN	-2.60575	-2.12497	-1.2423	-2.87463	-3.29971	NaN	-1.56696
LARS	Leucine--tRNA ligase, cytoplasmic		4	5.8	32.935	92470000	-1.9778	-1.5065	NaN	NaN	-1.91403	-0.724218	NaN	-1.9477	-1.72844	NaN	NaN	NaN	NaN	NaN	NaN	NaN	NaN	NaN	-1.40649	NaN	NaN	NaN	NaN	NaN	NaN	NaN	-1.71555	-1.75447	-1.97589	-2.05973	NaN	NaN	NaN	NaN	NaN	NaN	-0.670935	NaN	NaN	NaN	NaN	NaN	-2.1954
nef			16	72.5	203.17	12746000000	NaN	NaN	NaN	NaN	NaN	NaN	NaN	NaN	NaN	NaN	NaN	NaN	NaN	NaN	NaN	NaN	NaN	NaN	NaN	NaN	NaN	NaN	NaN	-3.27111	NaN	-8.52727	NaN	NaN	NaN	NaN	NaN	NaN	NaN	NaN	NaN	NaN	11.3971	9.40366	8.78558	NaN	NaN	NaN	-4.73323
VPS29	Vacuolar protein sorting-associated protein 29;Vacuolar protein sorting-associated protein 29		2	12.6	12.551	53726000	NaN	NaN	NaN	-2.09268	-1.76286	-1.96265	NaN	-2.15568	-2.11182	NaN	NaN	NaN	NaN	NaN	NaN	NaN	NaN	NaN	-2.52034	-2.35714	NaN	NaN	NaN	NaN	NaN	NaN	-2.09208	NaN	-2.85677	-2.07584	NaN	NaN	NaN	NaN	NaN	NaN	NaN	NaN	NaN	NaN	NaN	NaN	-1.62265
UBA2	SUMO-activating enzyme subunit 2		3	17.6	24.222	131730000	-1.06995	-1.65479	-1.75904	-1.08017	-1.23555	-1.08389	NaN	-1.71694	-1.4051	-2.34167	NaN	NaN	NaN	NaN	NaN	NaN	NaN	NaN	-0.901192	NaN	NaN	NaN	NaN	NaN	-2.11312	-1.82507	-1.64062	-1.46529	-1.7217	-1.21846	NaN	NaN	NaN	NaN	-2.43272	NaN	NaN	NaN	NaN	NaN	NaN	NaN	-0.0466919
NIPSNAP3A	Protein NipSnap homolog 3A		2	15	20.763	48870000	NaN	NaN	NaN	-1.88402	-1.67217	-1.63076	NaN	NaN	NaN	NaN	NaN	NaN	NaN	NaN	NaN	NaN	NaN	NaN	NaN	NaN	NaN	NaN	NaN	NaN	NaN	-2.414	NaN	-1.84916	-1.8123	-1.90972	NaN	NaN	NaN	NaN	NaN	NaN	NaN	NaN	NaN	NaN	NaN	NaN	-2.30726
TES	Testin		2	6.3	11.317	72846000	NaN	NaN	NaN	-1.39037	-1.87846	-1.80064	-2.20094	-2.48059	-2.63734	-1.9397	NaN	NaN	NaN	NaN	NaN	NaN	NaN	NaN	-1.2918	-2.61061	-3.34911	-1.58658	NaN	NaN	-1.91851	NaN	-0.8277	-2.11103	-2.39898	-1.57451	NaN	NaN	-2.13943	-2.24003	-1.68924	NaN	-2.53161	NaN	NaN	NaN	NaN	NaN	-1.28522
HMGXB4	HMG domain-containing protein 4		1	6	8.4135	29020000	NaN	NaN	NaN	NaN	-2.51961	-2.55268	NaN	NaN	NaN	-2.09609	-1.86943	-1.80838	NaN	NaN	NaN	NaN	NaN	NaN	NaN	NaN	NaN	-2.42662	-1.98234	NaN	NaN	-3.22106	-3.13772	NaN	NaN	-2.31625	NaN	NaN	NaN	-1.68649	-2.06745	NaN	NaN	NaN	NaN	-2.41088	NaN	NaN	NaN
2009-09-01	Septin-9		5	10.4	30.387	176050000	-1.42435	-1.32904	-1.48209	-1.02815	-0.323175	-0.744781	-1.01461	-0.865566	-0.170527	NaN	NaN	-1.19596	NaN	NaN	NaN	NaN	NaN	NaN	-1.31519	-1.92492	-1.61254	NaN	-1.36538	NaN	NaN	NaN	-0.899094	-0.984135	-1.51528	-0.81756	NaN	NaN	-0.748158	NaN	NaN	NaN	-1.68529	NaN	NaN	NaN	NaN	NaN	-0.138422
STEAP1	Metalloreductase STEAP1		1	2.9	6.5004	673130000	1.77675	-0.0287857	0.972277	-0.215183	-0.679049	-0.397839	1.33998	0.651617	-0.829849	1.88597	0.993759	1.09718	0.890621	0.58271	NaN	1.33383	0.85178	0.616289	0.4694	0.0666542	-0.224031	0.84972	0.731522	0.764359	2.21768	1.49759	-0.227123	0.536896	0.209141	0.464531	1.23964	1.31681	0.461735	0.836998	1.35139	1.51855	2.03256	1.24081	0.785053	0.204399	1.37086	1.48662	-0.245714
STOML2	Stomatin-like protein 2, mitochondrial		5	29.9	72.636	176810000	NaN	-1.66177	NaN	-0.659643	0.849909	-0.457623	NaN	NaN	-1.24609	NaN	NaN	NaN	NaN	NaN	NaN	NaN	NaN	NaN	0.570776	-1.50705	NaN	NaN	NaN	NaN	NaN	NaN	NaN	-1.56214	-1.51542	NaN	NaN	NaN	-0.399332	NaN	NaN	NaN	NaN	NaN	NaN	NaN	NaN	NaN	-1.05003
NUDT5	ADP-sugar pyrophosphatase		4	25.6	28.442	214300000	NaN	NaN	NaN	0.921101	0.818865	0.99794	NaN	NaN	NaN	NaN	NaN	-1.58146	NaN	NaN	NaN	NaN	NaN	NaN	NaN	NaN	NaN	NaN	NaN	NaN	NaN	NaN	0.608456	-0.111675	-0.789278	-0.282736	NaN	NaN	NaN	NaN	NaN	NaN	NaN	NaN	NaN	NaN	NaN	NaN	1.49155
RALY	RNA-binding protein Raly		3	16.9	27.7	64862000	NaN	NaN	NaN	-2.2178	-0.375004	-0.974718	NaN	NaN	NaN	NaN	-2.55411	NaN	NaN	NaN	NaN	NaN	NaN	NaN	NaN	NaN	NaN	NaN	-2.43835	NaN	NaN	NaN	-1.82824	NaN	NaN	-1.87089	NaN	NaN	NaN	NaN	NaN	NaN	NaN	NaN	NaN	NaN	NaN	NaN	-1.83297
ACIN1	Apoptotic chromatin condensation inducer in the nucleus		7	14.6	47.66	348510000	NaN	-1.92873	-1.30014	NaN	-0.727768	-1.92694	NaN	-1.46655	-2.23829	-0.808025	1.00288	-1.18054	-2.00035	-1.00834	NaN	-2.09102	-1.73196	-1.32402	2.48788	0.46217	-0.745499	-1.7649	1.0441	-0.408606	-0.673157	-1.00233	-1.21715	-2.33817	-1.12308	-1.82556	-1.60759	-1.14614	-1.96859	-1.66647	-1.177	-1.35755	-0.933718	-2.97828	-1.44011	NaN	-1.24917	NaN	-2.32683
RAB21	Ras-related protein Rab-21		3	18.7	36.638	142010000	-1.56489	-2.47672	-3.38874	-1.65433	-0.682247	-0.917799	-1.56995	-1.01355	-0.48381	NaN	NaN	-1.95007	NaN	NaN	NaN	NaN	NaN	NaN	-1.48236	-1.93523	-2.28339	NaN	NaN	NaN	NaN	-0.82049	-0.806953	NaN	-1.74792	-1.66253	NaN	NaN	-1.64273	NaN	NaN	NaN	-1.9659	NaN	NaN	NaN	NaN	NaN	-1.38093
MCTS1	Malignant T-cell-amplified sequence 1		1	10.1	8.0808	18314000	NaN	NaN	NaN	NaN	NaN	NaN	-1.44794	NaN	-0.611362	NaN	NaN	NaN	NaN	NaN	NaN	NaN	NaN	NaN	NaN	NaN	-2.23271	NaN	NaN	NaN	NaN	NaN	NaN	NaN	NaN	NaN	NaN	NaN	NaN	NaN	NaN	NaN	NaN	NaN	NaN	NaN	NaN	NaN	NaN
CORO1C	Coronin-1C;Coronin;Coronin;Coronin;Coronin;Coronin;Coronin;Coronin;Coronin;Coronin		6	15.4	51.236	358210000	NaN	NaN	-1.47424	0.00172615	0.84239	-0.297699	-0.546154	-0.967831	0.817616	-1.08359	-1.85756	NaN	NaN	NaN	NaN	NaN	NaN	NaN	0.386555	-1.74658	-0.0488224	-1.0239	-1.53815	NaN	NaN	-1.35901	-0.767729	-0.945751	-0.0632744	-1.32336	NaN	NaN	-1.03019	-1.81284	NaN	NaN	NaN	NaN	NaN	-1.08859	NaN	NaN	-1.22945
PRPF19	Pre-mRNA-processing factor 19		10	31.2	106.5	912970000	0.145292	1.20554	1.61497	1.17663	3.17766	1.61526	0.276035	0.476622	1.19936	0.0791225	-0.757341	0.084446	NaN	NaN	NaN	NaN	NaN	NaN	1.27536	-0.374498	-0.0259209	NaN	NaN	NaN	NaN	-0.263849	-0.0486469	1.08393	1.41397	2.15103	NaN	NaN	0.980904	-0.203934	NaN	NaN	NaN	NaN	NaN	NaN	0.263536	NaN	0.411211
G3BP2	Ras GTPase-activating protein-binding protein 2		1	2.9	7.4889	76777000	-1.548	-3.44937	-1.84219	-2.00857	-2.08204	-1.52061	-2.00381	-1.77791	-2.20034	NaN	NaN	NaN	NaN	NaN	NaN	NaN	NaN	NaN	-2.28482	NaN	-2.71945	NaN	NaN	NaN	NaN	-1.83405	-1.08478	-2.30989	-1.79362	-1.76825	NaN	NaN	-1.42221	-2.10493	NaN	NaN	NaN	-2.88497	NaN	NaN	-2.27333	NaN	-1.5507
C19orf53	Leydig cell tumor 10 kDa protein homolog		4	27.3	24.942	2389700000	3.72291	2.66768	-0.0492172	-0.304214	1.23683	0.00899887	3.44887	2.4999	1.05492	-0.261538	2.62052	1.33618	0.780893	2.83413	0.56761	2.30382	2.525	1.876	1.248	1.4312	0.368288	3.35295	3.09231	2.58521	2.54384	3.41844	2.51897	1.33276	1.63053	1.46787	2.61919	4.13402	2.09358	3.34741	2.30939	-0.454332	2.82113	4.5986	2.29755	1.78615	3.57545	NaN	-0.453508
SRRM2	Serine/arginine repetitive matrix protein 2		38	23.5	323.31	13137000000	-0.365602	0.273624	2.68722	2.00167	1.71917	0.809179	2.16227	2.57383	-4.09083	3.08324	4.11483	2.77222	-0.138468	-0.110228	-2.0983	3.29587	2.44493	2.39076	7.38604	6.11403	8.24518	2.33019	4.74797	3.0217	3.14628	3.2971	1.6866	2.04723	2.45187	1.70617	1.44451	0.122917	-0.786278	2.75376	3.12019	3.25945	3.10169	1.05768	0.357328	2.43262	2.938	3.99134	1.21403
PA2G4	Proliferation-associated protein 2G4		11	36	120.3	1381300000	1.64232	1.12017	0.341917	1.78289	3.0896	3.08113	1.71266	1.2624	1.88724	0.0452118	-0.640577	-0.501429	-2.86593	NaN	NaN	NaN	-0.848406	-1.80425	1.87365	0.100416	1.22516	0.913311	-0.11149	-0.541492	0.114195	1.53695	1.34922	2.02034	1.25642	1.92184	-1.45037	0.121916	2.59968	-0.0944805	0.391951	NaN	-2.38941	0.0211201	-1.47139	-0.761335	-1.7254	-0.755491	2.25147
RUVBL2	RuvB-like 2		4	11.7	25.852	170840000	-0.951561	NaN	NaN	-1.15985	-1.31794	-1.24722	-1.62778	-0.812576	0.559294	-2.29005	NaN	NaN	NaN	NaN	NaN	NaN	NaN	NaN	-0.961767	NaN	-1.55386	NaN	NaN	NaN	NaN	-0.88554	-1.30456	-1.21428	-1.42003	-1.57818	NaN	NaN	-1.3792	NaN	-2.82995	NaN	NaN	NaN	NaN	NaN	NaN	NaN	0.849335
PIN4	Peptidyl-prolyl cis-trans isomerase NIMA-interacting 4		1	15.4	6.9679	140680000	0.0673065	NaN	NaN	-0.856199	-1.55699	-1.78557	-0.289396	-2.03177	-1.59364	-0.263599	-2.95104	-0.879011	-0.983957	NaN	NaN	NaN	NaN	NaN	NaN	NaN	-1.75245	NaN	-1.08855	-0.466711	-0.00320244	NaN	-1.23056	-0.206579	-1.31647	-0.991886	NaN	NaN	NaN	-0.422052	-1.07221	1.0843	0.226192	NaN	NaN	NaN	-1.16793	NaN	NaN
HIGD1A	HIG1 domain family member 1A, mitochondrial		1	21.7	7.7685	29284000	NaN	NaN	NaN	NaN	NaN	NaN	NaN	-1.99125	-2.11815	NaN	NaN	NaN	NaN	NaN	NaN	NaN	NaN	NaN	-2.22029	NaN	-2.1091	NaN	NaN	NaN	NaN	NaN	NaN	NaN	NaN	NaN	NaN	NaN	NaN	NaN	NaN	NaN	NaN	NaN	NaN	NaN	NaN	NaN	NaN
EIF3L	Eukaryotic translation initiation factor 3 subunit L;Eukaryotic translation initiation factor 3 subunit L;Eukaryotic translation initiation factor 3 subunit L;Eukaryotic translation initiation factor 3 subunit L;Eukaryotic translation initiation factor 3 subunit L		2	15.3	13.902	42856000	-1.95154	NaN	-2.75637	-1.35984	NaN	NaN	NaN	-2.18921	-2.33725	NaN	NaN	NaN	NaN	NaN	NaN	NaN	NaN	NaN	-0.565924	NaN	-2.2075	-1.83176	NaN	NaN	NaN	-2.16135	NaN	NaN	NaN	NaN	NaN	NaN	-2.36039	NaN	NaN	NaN	NaN	NaN	NaN	NaN	NaN	NaN	NaN
RUVBL1	RuvB-like 1		2	8.9	14.305	41963000	NaN	NaN	NaN	NaN	NaN	NaN	NaN	-2.17128	-2.4048	NaN	NaN	NaN	NaN	NaN	NaN	NaN	NaN	NaN	-1.9681	-2.54729	-3.58301	NaN	NaN	NaN	NaN	NaN	-2.5444	-2.24641	NaN	-2.50146	NaN	NaN	-2.48836	NaN	NaN	NaN	NaN	NaN	NaN	NaN	NaN	NaN	-0.756844
FARSA	Phenylalanine--tRNA ligase alpha subunit		1	6.5	6.6003	14767000	NaN	NaN	NaN	NaN	-3.689	-3.26764	NaN	-3.24949	-3.37522	NaN	NaN	NaN	NaN	NaN	NaN	NaN	NaN	NaN	NaN	NaN	NaN	NaN	NaN	NaN	-3.29514	-3.97532	-3.12929	-3.13373	-3.50441	NaN	NaN	NaN	-3.06842	NaN	-3.02946	NaN	NaN	NaN	NaN	NaN	NaN	NaN	-3.26971
DRG1	Developmentally-regulated GTP-binding protein 1		2	6.5	11.497	23555000	NaN	NaN	NaN	NaN	-2.65499	-2.54222	NaN	NaN	-2.90902	NaN	NaN	NaN	NaN	NaN	NaN	NaN	NaN	NaN	-3.23056	NaN	NaN	NaN	NaN	NaN	NaN	NaN	NaN	-2.76787	-2.79604	NaN	NaN	NaN	-3.07131	NaN	NaN	NaN	NaN	NaN	NaN	NaN	NaN	NaN	-2.20977
TMA7	Translation machinery-associated protein 7		6	40.6	75.604	14399000000	4.04681	5.7105	4.10026	3.45923	4.33652	5.15858	3.91819	3.12095	4.10316	5.37662	5.81306	5.79669	3.15446	5.0049	4.54695	4.98212	5.17739	6.32243	3.53411	2.32041	4.08455	5.74448	5.96612	7.05196	4.79	4.16243	5.903	3.93262	4.92884	4.69339	3.34786	4.4302	5.08521	6.91638	5.07265	5.46245	4.01399	5.7453	5.22525	6.02173	5.12351	4.83692	2.76419
CARHSP1	Calcium-regulated heat stable protein 1		2	27.2	16.444	204760000	-0.67098	NaN	-0.837915	-1.0153	NaN	-1.09357	0.416508	-1.19937	-1.26766	-0.707472	NaN	-0.852486	-1.15845	NaN	NaN	-0.819399	-1.74022	-1.47664	-0.846546	NaN	NaN	0.40122	-2.50358	-0.317568	1.62198	-1.81834	NaN	0.761818	-1.58693	-1.5503	NaN	-0.845444	-0.841499	-1.42409	-1.52146	-0.280346	0.0688171	-0.790676	NaN	-0.833452	0.482527	-0.0513401	-1.22837
NOP58	Nucleolar protein 58		4	10.6	55.116	796860000	-0.230227	0.0377464	0.653355	-0.691301	0.24539	0.0522976	-0.127602	-0.355164	-2.31182	2.1045	2.8576	0.996292	-0.7134	1.01803	NaN	2.10956	0.718758	0.027523	-0.0828762	0.925293	-0.190826	1.46218	1.37878	0.442163	1.01525	1.39729	-0.603689	0.0810261	0.237852	0.334429	-0.947655	NaN	-1.45613	1.5723	1.42072	1.17269	0.355024	0.646416	-0.524693	-0.127457	1.56936	0.813105	-0.686413
C7orf55-LUC7L2			14	48.7	323.31	11457000000	4.23194	4.85358	4.42378	3.47869	4.18283	4.23306	3.91041	3.65513	3.34806	5.13791	5.15189	5.87605	3.70758	3.9988	4.0821	4.90302	5.05628	5.38827	3.37686	3.55707	4.04723	4.63934	5.42596	6.23326	4.74933	3.99168	4.77813	3.9029	4.62397	4.47632	4.67153	4.54247	4.22846	5.775	5.16742	4.90156	5.31414	4.96041	4.25304	5.13106	5.33093	4.46832	3.27968
RBMX2	RNA-binding motif protein, X-linked 2		1	4.4	6.8835	83193000	NaN	-2.76088	-2.26473	-2.581	-3.00943	NaN	-1.38195	-2.11383	NaN	-1.3787	-1.34256	-2.06474	-2.13995	-2.07132	NaN	-2.13114	-1.42921	NaN	-2.01198	-1.60078	-2.29983	-1.99089	-1.77485	-2.12965	-1.61305	-0.580347	-3.36507	NaN	-2.21947	NaN	-1.81547	-1.84968	-2.45281	NaN	-1.67058	-1.55781	-1.07174	-1.61317	-1.77035	NaN	-2.06847	NaN	NaN
PPIL1	Peptidyl-prolyl cis-trans isomerase-like 1;Peptidyl-prolyl cis-trans isomerase		1	10.2	7.0016	48376000	NaN	NaN	NaN	-2.36312	-1.45916	-2.4197	NaN	NaN	NaN	NaN	NaN	NaN	NaN	NaN	NaN	NaN	NaN	NaN	-1.67475	-3.17511	-3.02833	NaN	NaN	NaN	NaN	NaN	NaN	-2.48534	NaN	NaN	NaN	NaN	-2.54608	NaN	NaN	NaN	NaN	NaN	NaN	NaN	NaN	NaN	-2.00295
HDGFRP3	Hepatoma-derived growth factor-related protein 3		2	12.1	12.172	62074000	-1.90721	-1.25857	NaN	NaN	NaN	NaN	NaN	NaN	-1.94983	-1.84835	NaN	-1.08772	NaN	-1.96412	NaN	-1.7466	-1.69078	-1.68938	-2.27586	NaN	-2.01106	NaN	NaN	-1.08065	NaN	NaN	-1.68647	NaN	-1.79791	NaN	NaN	NaN	NaN	-1.04882	NaN	-1.96585	NaN	NaN	-2.14247	-1.29534	NaN	NaN	NaN
STRAP	Serine-threonine kinase receptor-associated protein		13	58.3	125.71	1042500000	-0.114231	-0.939442	-1.25237	1.15251	3.94543	3.65967	-0.440142	0.359224	1.64909	NaN	NaN	NaN	NaN	-0.979361	NaN	NaN	NaN	NaN	1.15225	-0.631508	0.29492	NaN	-2.23262	-3.30361	-0.965986	-1.22087	0.129301	0.389528	0.295931	-0.282001	NaN	-1.57843	1.1144	-2.01811	-2.21899	NaN	-0.177063	-0.415386	NaN	-2.20502	NaN	NaN	0.892292
RTCB	tRNA-splicing ligase RtcB homolog		7	21	57.445	538410000	1.18125	-0.135227	0.000282288	-0.0333862	1.42974	1.12729	0.591219	0.472113	0.264688	-0.263885	-1.01662	-0.15657	NaN	-0.573744	NaN	-0.0943222	-0.773779	-0.390635	-0.140163	NaN	NaN	-0.820776	-1.14588	NaN	-0.0477371	NaN	-0.340551	0.585381	-0.678806	-0.117626	NaN	-2.09136	0.667114	-0.515419	-0.250423	-0.165297	-0.389795	NaN	NaN	-0.893114	-0.32848	-0.0212288	1.47137
HBS1L	HBS1-like protein		1	16.2	7.5144	59158000	NaN	NaN	NaN	-1.449	-1.15605	-1.70303	-2.18213	-2.31825	-2.10646	NaN	NaN	NaN	NaN	NaN	NaN	NaN	NaN	NaN	-2.22818	-3.01563	-2.49201	-1.36044	-1.69185	NaN	NaN	NaN	NaN	NaN	NaN	NaN	NaN	NaN	-1.97491	NaN	NaN	NaN	NaN	NaN	NaN	NaN	NaN	NaN	-2.40352
YTHDF2	YTH domain-containing family protein 2		3	8.4	25.201	138900000	-1.34241	-2.37473	-1.71123	-0.999424	-2.5165	0.00170708	-1.04439	-0.880068	0.103134	NaN	NaN	NaN	NaN	NaN	NaN	NaN	NaN	NaN	-1.22522	-1.83354	-1.50423	NaN	NaN	NaN	-3.19932	-1.90442	-1.27324	-1.67439	NaN	-2.30423	-3.28113	NaN	-1.3758	NaN	NaN	NaN	NaN	NaN	NaN	NaN	NaN	NaN	-0.433426
SUPT16H	FACT complex subunit SPT16		9	10.2	70.946	613740000	0.851282	0.058136	2.04158	2.75306	0.936878	0.617966	0.993813	1.12995	1.27654	-0.841639	-0.4884	-0.890476	NaN	NaN	NaN	NaN	NaN	NaN	2.1808	0.0809402	0.695179	-0.794621	-1.1406	-0.459492	-1.98157	-1.06166	-0.728088	-0.860252	-0.508375	-0.202747	NaN	NaN	0.0294037	NaN	-1.76993	NaN	NaN	NaN	NaN	NaN	NaN	NaN	-0.409527
SRPRB	Signal recognition particle receptor subunit beta		2	21.2	13.858	43822000	NaN	NaN	NaN	-2.76811	NaN	-3.26973	-3.54774	-2.71204	-1.53439	NaN	NaN	NaN	NaN	NaN	NaN	NaN	NaN	NaN	NaN	NaN	NaN	NaN	NaN	NaN	NaN	-2.41234	-1.76231	-2.91021	-2.95362	-2.04861	NaN	NaN	NaN	NaN	NaN	NaN	NaN	NaN	NaN	NaN	NaN	NaN	-0.680731
PSAT1	Phosphoserine aminotransferase;Phosphoserine aminotransferase		4	17	24.894	1568800000	NaN	NaN	NaN	1.46677	1.41136	1.55433	2.66406	2.23362	1.79614	NaN	2.97595	NaN	NaN	NaN	1.01843	NaN	NaN	NaN	1.49346	NaN	1.6776	NaN	NaN	NaN	-1.82394	1.78086	2.89259	1.42118	0.926609	1.5495	NaN	NaN	NaN	NaN	2.89352	NaN	3.52019	NaN	NaN	NaN	2.68616	NaN	4.94114
COPG1	Coatomer subunit gamma-1		1	8	6.414	72635000	NaN	-2.17684	-1.36556	-1.6668	-1.53141	-0.790741	-2.51027	NaN	-1.00867	NaN	NaN	NaN	NaN	NaN	NaN	NaN	NaN	NaN	-1.67892	-3.08558	-2.58199	NaN	NaN	NaN	NaN	NaN	NaN	NaN	NaN	NaN	NaN	NaN	-1.17999	NaN	NaN	NaN	NaN	NaN	NaN	NaN	NaN	NaN	-1.12209
CLIC4	Chloride intracellular channel protein 4;Chloride intracellular channel protein		1	4.7	7.1119	51748000	NaN	-2.73622	NaN	NaN	NaN	NaN	NaN	NaN	NaN	NaN	NaN	NaN	NaN	-3.34917	NaN	NaN	-2.60047	NaN	-1.83118	-2.40348	NaN	NaN	NaN	NaN	NaN	NaN	NaN	NaN	NaN	NaN	NaN	NaN	NaN	-1.31824	-1.16188	NaN	NaN	NaN	NaN	NaN	NaN	NaN	-0.36956
SPCS1	Signal peptidase complex subunit 1		1	21.2	7.4998	106380000	NaN	-2.35745	-1.89532	-1.25364	-0.992836	-0.967493	-2.26093	-2.26379	-2.15786	NaN	NaN	NaN	NaN	NaN	NaN	NaN	NaN	NaN	-1.87987	-2.10387	-2.21729	NaN	-1.7472	NaN	NaN	NaN	-2.188	NaN	-2.0262	-1.68168	NaN	NaN	NaN	NaN	NaN	NaN	NaN	NaN	NaN	NaN	NaN	NaN	-2.25375
TCEB3	Transcription elongation factor B polypeptide 3		2	2.7	12.67	7838800	NaN	NaN	NaN	NaN	NaN	NaN	NaN	NaN	NaN	NaN	NaN	NaN	NaN	NaN	NaN	NaN	-5.25076	NaN	NaN	NaN	NaN	NaN	-1.01319	NaN	NaN	NaN	NaN	NaN	NaN	NaN	NaN	NaN	NaN	NaN	NaN	NaN	NaN	NaN	NaN	NaN	-5.84748	NaN	NaN
DDX46	Probable ATP-dependent RNA helicase DDX46	+	102	64.7	323.31	428000000000	0.802706	3.1322	1.21303	-0.272722	1.99613	1.75041	0.123028	0.194756	2.24998	1.38176	2.5267	3.33876	-4.09108	-0.560665	0.0595512	1.35284	1.22013	1.43328	11.7234	12.8097	12.3561	0.710262	0.458309	2.91041	-0.152639	-0.357016	0.716494	0.456367	2.51089	2.48349	2.87399	1.02057	-0.137129	3.15671	1.09034	-0.436211	0.297159	3.14138	0.440842	1.00655	2.68879	-0.382683	-0.457024
ICA1L	Islet cell autoantigen 1-like protein		1	19.5	6.5323	3218000000	2.71459	2.92177	2.86952	2.10559	2.14945	1.94838	3.4954	2.57778	1.74559	3.47646	3.26803	4.12056	1.9825	2.45405	NaN	3.83579	3.21527	3.20718	2.37975	2.58095	NaN	3.34656	3.75308	2.71074	4.68745	2.51295	2.22354	2.46789	2.93435	2.56201	3.47073	NaN	NaN	3.15446	3.50258	3.41029	NaN	3.37541	NaN	2.61268	3.72289	3.20815	1.96601
PSMC1	26S protease regulatory subunit 4	+	2	67.9	12.352	147080000	NaN	NaN	NaN	NaN	NaN	NaN	NaN	NaN	NaN	NaN	NaN	NaN	NaN	NaN	NaN	NaN	NaN	NaN	NaN	NaN	NaN	NaN	NaN	NaN	NaN	NaN	NaN	NaN	NaN	NaN	NaN	NaN	NaN	NaN	NaN	NaN	NaN	NaN	NaN	NaN	NaN	NaN	NaN
THOC2	THO complex subunit 2		1	36.6	10.607	49259000	NaN	NaN	NaN	NaN	-2.42095	-2.24465	NaN	NaN	NaN	NaN	-1.53413	-1.51204	NaN	NaN	NaN	NaN	NaN	NaN	NaN	NaN	NaN	NaN	-1.33948	NaN	-1.53251	NaN	NaN	NaN	-1.3685	NaN	NaN	NaN	NaN	-1.03164	-1.54119	NaN	NaN	NaN	NaN	-2.29552	-1.54121	NaN	NaN
GNAO1	Guanine nucleotide-binding protein G(o) subunit alpha	+	1	96.4	14.822	173320000	NaN	NaN	NaN	NaN	NaN	NaN	NaN	NaN	NaN	NaN	NaN	NaN	NaN	NaN	NaN	NaN	NaN	NaN	NaN	NaN	NaN	NaN	NaN	NaN	NaN	NaN	NaN	NaN	NaN	NaN	NaN	NaN	NaN	NaN	NaN	NaN	NaN	NaN	NaN	NaN	NaN	NaN	0.946857
AP1S2	AP-1 complex subunit sigma-2		2	17.1	10.903	528270000	0.183226	0.835054	1.96676	1.0764	0.912287	0.643486	0.899157	0.109098	-0.167551	NaN	NaN	NaN	-0.0155029	0.351276	-0.34116	NaN	NaN	NaN	0.0419655	0.532022	0.514229	NaN	NaN	NaN	NaN	NaN	1.34848	NaN	0.962524	1.13517	2.5591	1.52837	0.788982	NaN	NaN	NaN	1.8566	1.86772	1.02451	NaN	NaN	NaN	NaN
SRRM2	Serine/arginine repetitive matrix protein 2		1	13.6	7.2161	69988000	NaN	-3.71416	-2.97779	NaN	NaN	-3.2641	-2.5703	-2.86975	NaN	-2.09353	-0.472261	-2.85103	NaN	-2.67737	NaN	-2.43718	-2.6722	-3.23774	-1.06642	-1.70892	-0.851759	-2.55769	-0.150686	-1.81064	NaN	-0.864723	-3.74922	NaN	NaN	-2.88474	-3.49056	NaN	NaN	NaN	NaN	NaN	-1.93526	-3.06755	-2.9667	NaN	-2.02632	-1.74649	NaN
U2AF2	Splicing factor U2AF 65 kDa subunit		2	81.4	10.65	145860000	NaN	NaN	NaN	-1.37523	-1.40282	-1.1196	NaN	NaN	NaN	0.269196	-0.309486	-0.497543	NaN	NaN	NaN	0.338577	-0.217257	-0.814278	NaN	NaN	NaN	-0.263224	-0.319868	0.129358	0.737667	-0.267204	0.0474396	-0.232395	-0.853994	-0.262617	NaN	NaN	NaN	-0.785526	0.109291	0.0756073	NaN	NaN	NaN	-0.29981	-0.149654	0.306917	NaN
HIST2H3PS2	Histone H3		1	18.4	6.4795	801920000	-0.802734	-0.0213661	0.759781	0.696173	1.15808	1.55108	0.348862	0.746029	0.282246	0.922865	0.778212	0.474304	NaN	-1.18125	NaN	-0.612263	-0.536417	-1.22606	1.22733	0.873314	1.22673	0.559292	0.892035	-0.625299	-0.207769	0.582504	0.223969	0.397093	1.09734	0.779879	-0.258018	-0.200291	-0.575384	1.62726	1.72095	-0.982653	-0.196545	0.761276	-0.358042	0.41305	0.144142	-1.23691	0.592072
[truncated: 17 more columns]

## Sheet: DDX46
Gene name	Relative enrichment (DDX46)	Significance, -log p	Significant at FDR=0.05
DDX46	11.3375	18.4691	+
ZC3H13	8.26617	6.97312	+
PPIG	5.80261	8.81218	+
SRRM2	5.54849	5.89851	+
TRA2A	5.51963	6.32288	+
TRA2B	3.91372	4.87211	+
RPL6	2.6653	1.79584
ARF3	2.3497	0.570868
RAN	2.20099	1.12376
RPL5	2.19649	1.13845
SNRNP70	2.19298	2.97632
ACIN1	2.13913	3.85096	+
LMAN1	2.07712	4.3564	+
RPL12	2.06783	1.22018
SLC25A4	2.01005	1.25137
RAB1	1.98915	1.2564
FASN	1.98124	0.936266
AP3D	1.9159	0
RPS11	1.89493	0.85613
NKTR	1.82286	0.589588
RPS15A	1.78879	0.970733
RPL3	1.76961	0.897844
HNRNPC	1.75781	1.18146
RPS3	1.71781	0.783943
MDH2	1.67428	0.704972
SRRM1	1.65848	1.60658
PRPF4B	1.65529	1.94556
RPL23	1.60024	0.685554
RL26	1.57843	1.71937
PPM1F	1.56418	1.16569
XRCC6	1.55815	0.846509
RPS14	1.54959	0.74427
HIST1H2AB	1.53567	0
TMED10	1.51085	0
TCPA	1.50978	0.67488
RPS23	1.50128	0.640811
RBM25	1.49025	1.08171
NACA	1.48654	1.40631
SON	1.48187	0.746537
RPSA	1.48058	0
RPL7A	1.4657	1.48237
EEF2	1.44601	0.632092
SRSF8	1.44333	2.71232
GANAB	1.43365	0.804692
RPL28	1.40029	0.576842
CLTC	1.39355	0.750452
HNRNPU	1.37781	0.843883
TUFM	1.37605	0.454311
RPS2	1.37228	0.677285
RPS7	1.37085	0.82648
SRSF12	1.36228	3.00131
LDHA	1.35168	0.534314
RPS27L	1.3374	0.949076
PRPF38B	1.31127	1.98916
RPS4X	1.30906	0.92551
PARP1	1.30745	0.543533
PKM	1.29715	0.711971
RAB6A	1.28816	0.897034
FLNA	1.2842	1.02958
RPS8	1.28284	0.65863
RPS6	1.26652	0.534547
SRRM2	1.26467	1.3662
PRMT1	1.26205	0.936353
EIF4A1	1.25904	0.709085
EIF5B	1.23941	0.995379
MIF	1.23917	1.13525
H2AFY	1.21984	1.04971
LTV1	1.2098	0
SNRNP200	1.19472	1.0438
DDX3X	1.19051	0.563934
HIST1H1C	1.18297	1.38304
RPL9	1.15854	0.986109
TKT	1.15597	0.560376
RPS16	1.15569	1.32066
CDC42	1.15243	0.722204
EEF1G	1.1473	0.461755
FSCN1	1.13793	0.418706
PFN1	1.13014	0.955697
SMC4	1.12317	0
DDOST	1.10337	0.973663
DDX39B	1.09484	0.486411
ATP1A1	1.09276	1.28843
VDAC1	1.09076	0.596571
RPL27A	1.08994	0.938862
LDHB	1.08667	0.505398
HNRNPL	1.08187	0.51931
RPS20	1.07777	0.752159
RPN1	1.06861	0.698118
YTHDF3	1.0627	0
RPL27	1.06226	1.16448
RPF2	1.05844	0
HIST1H1D	1.02914	1.70128
EEF1A1P5	1.02853	0.699817
MT-CO2	1.02399	0.975007
SUPT16H	1.0213	0.931224
HSP90AA1	1.0127	0.453128
HIST3H3	0.988377	1.50516
SRSF6	0.983878	1.48457
RAC1	0.982837	0.438179
ATP5A1	0.981255	0.510852
DYNC1I2	0.967323	0
PDIA4	0.955807	1.53002
RPL1	0.949511	0.575303
RPL34	0.946213	0.360361
RPS13	0.943675	1.09344
VCP	0.942747	0.412722
NPM1	0.925968	0.792945
RPL18	0.917223	0.803996
RPL	0.910599	0.834388
SNRPD1	0.907275	0.446061
RACK1	0.904074	0.39994
RPL13	0.892063	0.716802
HNRNPD	0.885735	1.11329
PAICS	0.877192	0.775773
HIST1H4A	0.870537	0.560537
RBMX	0.866062	1.05684
VDAC2	0.862245	0.597779
MDH1	0.860841	0.333206
HIST2H3PS2	0.860165	1.12497
RPL10A	0.85419	0.825112
RPL36A-HNRNPH2	0.849093	0.671903
HSPE1	0.847826	0
GSPT1	0.838481	0.783418
RPL7	0.837638	0.887766
EIF3L	0.831164	1.35392
SNRPE	0.825975	0
RPL15	0.822216	0.52886
BOLA2	0.816991	0.658148
EIF4A3	0.800137	0.703715
SLC25A5	0.797757	0.80235
PRDX6	0.79302	0.265682
SCAMP2	0.776465	0.991126
ATP5F1	0.767122	1.51936
ACOT7	0.763393	0.742034
CCT8	0.756467	0.365288
MSN	0.743657	0.37137
MCM3	0.741744	0
CCT4	0.738302	0.361932
DHX9	0.736572	0.348975
UBA1	0.728292	0.475238
ACLY	0.72529	0.265604
CLPTM1	0.716959	0.601417
RPL11	0.710727	0.331838
DARS	0.695266	0.651373
ACACA	0.679742	0.473483
CFL1	0.674479	0.578007
RPL13	0.672217	0.633252
RPL32	0.669147	0.604614
DHX15	0.666624	1.12983
MYH9	0.652203	0.336642
PA2G4	0.63504	0.330915
DAD1	0.621815	0.643586
DDB1	0.618962	0.465838
PRDX3	0.618136	0.47191
SLC25A3	0.617267	0.473228
TXNL1	0.615271	0.30826
DYNLL1	0.613971	0.433845
PGK1	0.612002	0.332329
RAB1B	0.611961	0.421386
RAB7A	0.607143	0.308081
PRDX2	0.597711	0.331976
CCT6A	0.587839	0.30104
HSP90AB1	0.574211	0.377996
TMPO	0.562035	0
TALDO1	0.557676	0.877446
RPS26P11	0.549365	0.626278
SF3B3	0.547232	0.350034
PTBP1	0.544188	0.236179
RNPS1	0.543392	0.453176
UBA2	0.53884	0
PSMD3	0.538415	0.461973
PRPF40A	0.529493	0.612333
STOML2	0.525752	0.398141
DDX5	0.514991	1.63875
AHCY	0.511443	0.217175
SREK1	0.509755	0.558285
MARS	0.508475	0
MAT2A	0.506074	0.493087
TUBB4B	0.490096	0.240686
EFTUD2	0.486673	0.422727
PCNA	0.483397	0.270903
TRIM25	0.475133	0.916824
RAB5C	0.472144	0.280869
TBCB	0.463106	0.518933
RPL8	0.4567	0.212971
SNRPD3	0.451277	0.390013
GAPDH	0.447702	0.270453
AKAP17A	0.442139	0.313794
TUBB	0.435823	0.196961
RPS9	0.433935	0.59506
CYB5R3	0.432807	0.241144
NONO	0.432123	0.15125
RPL14	0.426907	0.410122
PRDX4	0.426294	0.563304
STRAP	0.425591	0.184447
HSP90B1	0.425574	0.264231
SURF4	0.423468	0
DLD	0.416419	0.161415
PGM3	0.409575	0
HSD17B10	0.40683	0.149996
RAB10	0.405461	0.309428
H2AFJ	0.404161	0.243463
EIF2S3L	0.399618	0.193005
SRSF10	0.387685	0.395882
VIM	0.378825	0.236513
PSMA7	0.377016	0.42916
GPI	0.356912	0.13514
ATP2A2	0.343644	0.357544
EIF2S1	0.341701	0.200656
SSRP1	0.338948	0.205809
ATP5J2	0.324314	0.348214
FBL	0.323934	0.153984
RPL4	0.320521	0.504434
PRDX1	0.320189	0.257511
SNRPD2	0.317686	0.14629
PPA1	0.314775	0
PABPC1	0.306944	0.341639
RPL38	0.303052	0.256727
CTSD	0.293855	0.198678
SLC1A5	0.2796	0.731325
KRT18	0.276355	0.119505
YWHAE	0.275473	0.242784
RBBP7	0.270425	0.129516
RPS24	0.270028	0.127858
SAFB	0.261143	0.170338
RPL24	0.258985	0.181962
SRSF7	0.257174	0.206979
PCBP2	0.244832	0.12922
LARS	0.244547	0
RAP1B	0.240934	0.186506
CCT3	0.240046	0.209382
TRIM28	0.237481	0.491992
HNRNPA1	0.23501	0.132436
HMGN3	0.230727	0
FKBP4	0.227719	0.264635
RPL17	0.227667	0.359933
ENO1	0.224063	0.0965692
ARHGDIA	0.223428	0.124539
PSMB6	0.210897	0.128834
LBR	0.207074	0.14761
HNRNPA0	0.201137	0.0837975
CSDE1	0.200371	0
SGPL1	0.194098	0
CACYBP	0.193902	0.0817776
PCBP1	0.18688	0.0760365
STAT1	0.181578	0
DNAJA1	0.178555	0.235591
CPNE3	0.174824	0.125432
IGF2BP1	0.169485	0.110469
DDX17	0.168352	0.169857
HNRNPM	0.16764	0.280734
EZR	0.164377	0
HSPD1	0.160855	0.131263
CPPED1	0.151062	0
CORO1C	0.145463	0.104014
HMGA1	0.141768	0.0633213
RABL6	0.138387	0.10516
ACTC1	0.138219	0.0912181
ANXA2	0.137979	0.115089
MPDU1	0.137401	0.113417
PRMT5	0.136336	0.249535
HINT2	0.131363	0.110797
RDX	0.13128	0.154842
PDIA6	0.129533	0.192961
GNB1	0.127658	0.0695863
DSTN	0.113178	0.0548195
RPL21	0.106857	0.0496933
HNRNPA3	0.106221	0.0632419
TUBA4A	0.104938	0.0554377
SSR4	0.0834739	0.0416864
RPS21	0.0810704	0
ATP5B	0.0796122	0.0439174
SMCA5	0.0663718	0
SNRNP40	0.0643545	0
ILF3	0.0586316	0.0313506
IARS	0.0580807	0.0396054
RPL22	0.0543357	0.0347314
PCCA	0.0542163	0.0321333
DDX39A	0.0507157	0
EIF3B	0.0462986	0.0633578
PC	0.0459151	0.0265777
FAU	0.0458921	0.0338365
HNRNPAB	0.0429593	0.0325273
MED1	0.0403129	0.0230614
ELAVL1	0.0374415	0.0163782
HSP	0.0340301	0.0270426
HSPA8	0.0322959	0.0350565
PRPSAP2	0.0321307	0
BCAP31	0.0280359	0.0186979
MLEC	0.0237251	0
ACTG1	0.0177809	0.01517
PSMA4	0.0137988	0.00921267
ARF5	0.0129914	0.0102039
RBMX2	0.0125421	0.0117698
ETF1	0.0110507	0
VTA1	0.00934982	0
RPL10	0.00915811	0.00535695
MYDGF	-0.00828702	0.00550405
ZC3H18	-0.00866445	0.00507539
CSRP1	-0.00963845	0
CAP1	-0.0132229	0.00577734
HNRNPA2B1	-0.0248852	0.0274728
RPLP0	-0.0261192	0.0220611
ATP5L	-0.0264904	0.0224661
PHB2	-0.0305597	0.0125361
OSBP	-0.042785	0.0426219
HMGN1	-0.0440349	0.0172889
ESYT1	-0.0454955	0.0609047
DDX42	-0.0492624	0.0271942
FKBP12-Exin	-0.0496304	0
NMT1	-0.0519463	0.0825251
PLEC	-0.0522007	0.0512317
PSMC2	-0.0530872	0
RPL31	-0.0533784	0.0487261
PPIA	-0.055563	0.0357463
CARHSP1	-0.0605522	0
RECQL	-0.0624863	0.0495869
TMEM263	-0.0635209	0.0336279
NME1-	-0.067291	0.0433753
MCCC1	-0.0676707	0.0581496
HNRNPH1	-0.0699351	0.0407436
KATNAL2	-0.0699982	0.0408383
PGAM4	-0.0717948	0.0544223
MCM2	-0.071795	0
USP14	-0.0793929	0.0454606
PARK7	-0.0794528	0
CHERP	-0.081023	0.0425572
RTCB	-0.0831821	0
BRD4	-0.0883127	0.0397766
LAMP1	-0.097149	0
SMU1	-0.100372	0.0862508
DDX6	-0.102791	0.100395
CCT7	-0.10328	0.0404901
RAB11A	-0.104481	0.0843827
HN1L	-0.105695	0.0748337
HSPA4	-0.116863	0.0577173
PGAM5	-0.119213	0.111344
U2AF1L5	-0.121098	0.115704
RCC2	-0.124486	0.0501588
PLP2	-0.126897	0.141461
DEK	-0.127848	0.102506
SRP14	-0.133058	0.149625
HDAC1	-0.135093	0
EIF6	-0.136056	0.0997842
SRSF11	-0.136708	0.137298
GLA	-0.14185	0
ZNF207	-0.142866	0.110327
GART	-0.143916	0.0662509
DKC1	-0.144197	0.148032
UBE2D3	-0.147065	0.109334
CAPZA1	-0.148007	0.172188
YTHDF2	-0.155978	0.0979326
CENPV	-0.156837	0
SEC13	-0.159675	0.113247
A	-0.16219	0.203287
EIF3G	-0.162629	0.141912
ALDO	-0.164393	0.0560081
RCC1	-0.167339	0.181814
EIF3H	-0.168847	0.0742466
DDX23	-0.169719	0.118823
ERVFC1	-0.171613	0.126918
RBBP4	-0.177366	0.153593
PSMC1	-0.182031	0.0198152
NKAPL	-0.182424	0.178065
RPS3A	-0.183174	0.12385
PTGES3	-0.183703	0.123501
TP53	-0.187707	0.156914
GLUD1	-0.192239	0.138659
USP5	-0.195633	0.15855
CKB	-0.196747	0.131826
SPCS2	-0.199087	0.165493
GDI2	-0.200368	0.0751716
GNB2	-0.200639	0.309865
ARL8A	-0.201538	0.331542
NOP58	-0.203141	0.133207
CAD	-0.204061	0.259394
WDR1	-0.207265	0.193014
MTCH1	-0.208271	0
HSP90AB4P	-0.208371	0
LUZP1	-0.213947	0.113446
GOT2	-0.214429	0
CDK12	-0.222012	0.140387
SUMO2	-0.223037	0.183728
HNRNPK	-0.223286	0.110795
RUVBL2	-0.225325	0.142888
YWHAH	-0.225766	0
PSMB1	-0.228846	0.180828
SLC25A11	-0.2313	0.155196
UQCRC1	-0.234313	0.24517
PSMB3	-0.234359	0.177907
SPCS1	-0.235498	0.394371
PPIL1	-0.236727	0.321413
ARPC4-TTLL3	-0.236728	0.628904
HSPA7	-0.247753	0.19921
ARGLU1	-0.251857	0.185872
PRPF8	-0.253822	0.212012
PLD3	-0.254835	0.193463
SFXN1	-0.256816	0.229888
SNRPF	-0.257676	0.286638
UCHL1	-0.261841	0.107103
CLIC1	-0.272113	0.0998744
EIF5A	-0.273064	0.267663
TOP	-0.278691	0.196648
SPTBN1	-0.28432	0
FLOT2	-0.291451	0.213448
CLPX	-0.292152	0.34041
NSRP1	-0.295065	0.191755
TARDBP	-0.296073	0.163456
ACSL3	-0.297553	0
COX17	-0.299129	0
FIP1L1	-0.305563	0.357026
HIGD1A	-0.306124	0.175749
VARS	-0.306411	0.384231
TIMM50	-0.307434	0.482108
SLC16A1	-0.307876	0
CAPZB	-0.313281	0.144578
TXNDC5	-0.320169	0.605688
CPSF6	-0.320468	0.283014
SHMT2	-0.325509	0.447027
DDX1	-0.326817	0.268718
SND1	-0.332093	0.193896
XRCC5	-0.336332	0.143803
CALR	-0.336845	0.417445
ARCN1	-0.338176	0.186744
TXN	-0.340014	0.202881
RUVBL1	-0.341382	0.422436
CIR1	-0.346575	0.212785
2011-09-01	-0.354231	0.259775
EPPK1	-0.356786	0.293346
NARS	-0.358634	0.368617
ATIC	-0.366097	0.363239
PSMB5	-0.375174	0.177734
NOP2	-0.382608	0.414336
EPRS	-0.387747	0.389623
ST3GAL3	-0.389856	0.361409
TAGLN2	-0.395323	0.433547
EIF3I	-0.395772	0.265621
ABCF1	-0.398931	0.491439
HIST3H2BB	-0.400746	0.267168
PHF3	-0.40157	0.333309
MC	-0.401892	0.933046
PSMG1	-0.402804	0.348379
MCM7	-0.40579	0.304125
CDKN2A	-0.409812	0
TARS	-0.409831	0.300101
IGF2BP3	-0.416385	0.610925
MCM4	-0.417892	0.470841
TCOF1	-0.418674	0.340037
APEX1	-0.420644	0.254168
YWHAZ	-0.421519	0.42957
GARS	-0.423612	0.227403
SUCLG1	-0.423863	0
SDHA	-0.428376	0.40718
KRR1	-0.434565	0
SERPINH1	-0.434748	0.220045
IMPDH2	-0.436658	0.952874
PLRG1	-0.436883	0.909598
GLO1	-0.43966	0.2636
MMTAG2	-0.443529	0.409253
NUP93	-0.44413	0.380201
ICA1L	-0.445841	0.462267
SREK1IP1	-0.447712	0.43906
THOC2	-0.448909	0.370912
SART1	-0.44901	0.36689
KHSRP	-0.45572	0.472578
TES	-0.456189	0.676366
MCM6	-0.457946	0.816452
PSAT1	-0.458952	0.216416
SRSF2	-0.462434	0.30819
EIF2A	-0.467712	0.585865
UGP2	-0.46855	0.612827
U2AF2	-0.470739	0.52411
PAFAH1B1	-0.474632	0
LUC7L3	-0.477987	0.330522
ARL6IP4	-0.480566	0.423934
TMED7	-0.48188	0
FLOT1	-0.485719	1.30894
IRS4	-0.486842	0
TUBA1C	-0.487261	0.264337
BUB3	-0.490147	0.384521
PSMD14	-0.493974	0
RSRC1	-0.49576	0.360371
CCDC124	-0.498557	0.454929
SFPQ	-0.500763	1.0966
PSMA3	-0.503708	0
RAB21	-0.504166	0.645488
PSMA6	-0.510657	0.369048
PSMD4	-0.513643	0.511732
TRIP12	-0.513793	0
VPS29	-0.513814	0.632088
HDGFRP3	-0.514514	0.594913
RAB14	-0.515351	0.292485
AIFM1	-0.52028	0.273202
CCNT1	-0.521877	0
ABL1	-0.524301	0
RRAS2	-0.525197	0
NPEPPS	-0.528387	0.683307
CASP3	-0.531734	0
SNRNP27	-0.537662	0.542381
PDIA3	-0.539073	0.704602
ADRM1	-0.542962	0.44912
RHOG	-0.54626	0
PEPD	-0.550995	0.786039
FUS	-0.556961	0.369159
DDX21	-0.567608	0.673028
CCT	-0.57025	0
G3BP2	-0.57479	0.877167
HNRNPUL1	-0.574858	0.513479
HSPA9	-0.580513	0.676306
RAB8A	-0.58262	0.694342
MAGOH	-0.584695	0
LMAN2	-0.585533	0.738557
PRPS1	-0.590624	0.633831
PRPF19	-0.59843	0.560186
SUPT5H	-0.602103	1.05168
RPS25	-0.604773	0.456677
AP1M1	-0.606209	0
ARPC2	-0.613147	0.960553
SNRPB	-0.616439	0.255064
RAB5B	-0.616837	1.82049
RSRC2	-0.619715	0.765056
AP1S2	-0.620623	0.716701
DRG1	-0.620875	0
EIF2AK2	-0.623016	1.05199
2009-09-01	-0.623813	1.32886
SRM	-0.625772	0.855122
NCL	-0.630642	0.639925
SOD1	-0.632638	0.52802
CCNT2	-0.633241	0.584865
PPIL4	-0.634482	0.709832
ADSS	-0.635494	0
HCFC1	-0.639746	1.52824
CLIC4	-0.640312	0.393787
PPIB	-0.642741	0.854136
CCT5	-0.643454	0.702388
EIF4B	-0.643538	1.01103
UFD1L	-0.644874	0
HBS1L	-0.654192	1.80728
CHAF1B	-0.675331	1.33921
2002-09-01	-0.676784	1.11719
STEAP1	-0.681088	0.847909
PNP	-0.682395	0.651742
HIST1H2BO	-0.683035	0.468301
CNP	-0.684641	0
SEC61B	-0.68487	0.713712
RPS28	-0.68512	0.561321
TOP1	-0.693234	0.923609
TUBB2A	-0.700224	0
PSMD2	-0.711175	0.743406
TBC1D10B	-0.711564	0.646764
M6PR	-0.711576	0
UBB	-0.711629	0.960574
ZC3HAV1	-0.728598	1.03275
PPP1R10	-0.732862	0.464197
EXOSC4	-0.738288	0
EMG1	-0.739051	0.594209
U2SURP	-0.743257	0.879031
ATP5C1	-0.743758	0
KHDRBS1	-0.749445	0.645081
RHOC	-0.754215	0.4223
HMGA2	-0.757674	0.598954
HMGN4	-0.75979	0.963521
ALDH18A1	-0.760667	0.721392
H3BRB0	-0.771421	0.816547
PRPF38A	-0.775149	1.18273
DIDO1	-0.776654	0.626357
CBR1	-0.778753	0
RPS12	-0.779419	0.322532
H1FX	-0.780772	1.00602
IMMT	-0.787093	0
IDI1	-0.790367	0
MTAP	-0.795338	2.11392
NIPBL	-0.799239	1.0314
HADHA	-0.800296	0.605424
EIF3D	-0.803981	0.819338
PRKDC	-0.807207	0.409479
AKR1B1	-0.817293	0.826894
PPP1CA	-0.828761	0
NOP56	-0.831259	0.90347
RBM39	-0.837409	1.69828
RRM1	-0.844791	3.63778
NRDE2	-0.848763	0
RBM15	-0.850728	1.2311
2007-09-01	-0.860367	0.558563
MESDC2	-0.860528	0
ACAT2	-0.862945	0
RSL1D1	-0.869842	1.15827
HSD17B4	-0.870343	0.59396
ABCB9	-0.870465	1.2589
SERBP1	-0.876815	1.38726
CWC22	-0.882786	0.474663
DCD	-0.884653	0.797523
PIN4	-0.888155	0
C7orf55-LUC7L2	-0.896197	1.52012
ILKAP	-0.896693	0
MMP10	-0.912627	1.4485
RPL3	-0.917988	1.3567
HMGCS1	-0.920776	0.930223
BRD3	-0.9263	0.872473
MDK	-0.930799	0.953083
P4HB	-0.935786	0
RPA1	-0.935893	1.13123
GFPT1	-0.936396	1.24018
CKAP4	-0.942637	1.06221
TOMM40	-0.944348	0.528261
RP9	-0.956635	0.841323
HIST2H2BF	-0.95815	1.2131
RPL23A	-0.964907	1.46639
NAA10	-0.965709	1.31493
COPG1	-1.01297	1.87014
SRSF1	-1.01713	0.854724
CNTLN	-1.0174	0.783768
PSMA2	-1.03213	0.48511
TRAP1	-1.03563	1.25758
PSMF1	-1.06679	0.820633
KPNA2	-1.07851	1.725
EDF1	-1.08319	1.13876
AHSA1	-1.09627	0
ALDH9A1	-1.09708	0
HLA-A	-1.1221	1.58888
LUC7L	-1.12492	0
PHB	-1.13174	1.22144
C19orf53	-1.13265	0.933471
ACO2	-1.13689	1.58974
MCTS1	-1.14323	0
LAGE3	-1.15713	0.480337
COPB2	-1.1586	0
ANKHD1	-1.1658	1.3423
HSP90AB2P	-1.16988	0
LLPH	-1.17233	0
MTDH	-1.17902	1.14851
NOLC1	-1.18142	1.5346
PSIP1	-1.20139	1.38209
SARS2	-1.2025	0
HMGB1	-1.24365	0.643859
CBX5	-1.24547	1.68638
HMGN2	-1.24593	1.95725
ACAT1	-1.25002	1.42722
PGD	-1.26101	0.824561
HMGB2	-1.27318	0
GOT1	-1.27535	0
NUCKS1	-1.2867	1.10377
QARS	-1.29063	0.532088
GRN	-1.29179	2.67693
C9orf78	-1.3066	1.2866
ACAA2	-1.33652	0.893579
EIF3A	-1.36961	0.795915
TPI1	-1.3757	2.89169
PTN	-1.37661	1.38337
PHPT1	-1.38794	1.47051
RPL29	-1.43121	2.39135
RNPEP	-1.43463	1.98965
TMA7	-1.49953	1.90448
SERF2	-1.51379	1.77621
SRSF3	-1.54686	3.04537
RAB27A	-1.5778	0
TUBB8	-1.61008	1.28273
WDR5	-1.63586	2.10491
SLI	-1.66298	1.26767
CBX3	-1.73986	1.35938
BLVRA	-1.8071	1.29678
AP3S1	-1.98088	1.85611
H2BFS	-2.23804	1.79953
SUB1	-2.40692	0
TUBB2B	-2.71845	0
BASP1	-3.90552	0
SRC	-4.87882	0.510982
GNAI3	-5.34831	0.558901
GNAO1	-5.46631	1.00457
RP2	-6.85429	0.474102
FAM49B	-8.30575	0
U2AF2	NaN	0
GNAO1	NaN	0
THOC2	NaN	0
PSMC1	NaN	0
TCEB3	NaN	0
SRPRB	NaN	0
FARSA	NaN	0
RALY	NaN	0
NUDT5	NaN	0
HMGXB4	NaN	0
NIPSNAP3A	NaN	0
nef	NaN	0
HACD3	NaN	0
CRIPT	NaN	0
MAT2B	NaN	0
TECR	NaN	0
OSTC	NaN	0
AASDHPPT	NaN	0
TIGAR	NaN	0
C12orf10	NaN	0
PNN	NaN	0
WDR33	NaN	0
GTPBP4	NaN	0
MRPL13	NaN	0
PSMG3	NaN	0
AIFM2	NaN	0
WDR77	NaN	0
ELAC2	NaN	0
EBNA1BP2	NaN	0
CHP1	NaN	0
RBM14	NaN	0
RAD50	NaN	0
ARPC1A	NaN	0
BRIX1	NaN	0
HM13	NaN	0
PNPT1	NaN	0
NUP43	NaN	0
BOD1L1	NaN	0
TDRD9	NaN	0
MAPK1IP1L	NaN	0
COLGALT1	NaN	0
ARL17B	NaN	0
THOC6	NaN	0
ALYREF	NaN	0
NUFIP2	NaN	0
HIST2H2AA3	NaN	0
SYPL1	NaN	0
DPYSL2	NaN	0
NEDD8	NaN	0
NSDHL	NaN	0
TRIP13	NaN	0
RAB	NaN	0
PWP2	NaN	0
EBP	NaN	0
PAFAH1B3	NaN	0
RAB39A	NaN	0
DYNC1H1	NaN	0
FHL1	NaN	0
PABPC4	NaN	0
ECH1	NaN	0
PPP1R8	NaN	0
AIM	NaN	0
TWF1	NaN	0
NSUN2	NaN	0
LG3BP	NaN	0
SOS1	NaN	0
EEF1A2	NaN	0
CSTF1	NaN	0
PAFAH1B2	NaN	0
RPL11	NaN	0
PSMC5	NaN	0
NCS1	NaN	0
B2M	NaN	0
RPL37A	NaN	0
ABCE1	NaN	0
RAB	NaN	0
CD81	NaN	0
ELOF1	NaN	0
MANF	NaN	0
DRG2	NaN	0
COPA	NaN	0
POLR2H	NaN	0
VAMP7	NaN	0
PSMD7	NaN	0
PREP	NaN	0
UQCRFS1P1	NaN	0
CAPZA2	NaN	0
RPS5	NaN	0
CRKL	NaN	0
PPP1CC	NaN	0
SERPINB6	NaN	0
PFN2	NaN	0
C21orf33	NaN	0
PSMB4	NaN	0
CANX	NaN	0
WARS	NaN	0
HK1	NaN	0
CTPS1	NaN	0
HMGA1	NaN	0
RPA2	NaN	0
AKR1A1	NaN	0
ETFA	NaN	0
RNH1	NaN	0
gag	NaN	0
PRPS2	NaN	0
RALB	NaN	0
PDHB	NaN	0
HSPA5	NaN	0
ESD	NaN	0
ALDOC	NaN	0
LTA4H	NaN	0
SNRPA1	NaN	0
GSTP1	NaN	0
PDHA1	NaN	0
PTMA	NaN	0
GNAI2	NaN	0
RPN2	NaN	0
HPRT1	NaN	0
BPNT1	NaN	0
ENDOD1	NaN	0
ARL6IP5	NaN	0
PMPCB	NaN	0
GGCT	NaN	0
NOL3	NaN	0
CUTA	NaN	0
TIMM44	NaN	0
HNRNPR	NaN	0
PRPF4	NaN	0
PPM1G	NaN	0
MRPS12	NaN	0
PFAS	NaN	0
HAT1	NaN	0
PDXK	NaN	0
PPP6C	NaN	0
RTCA	NaN	0
NUDT19	NaN	0
SMCHD1	NaN	0
ILVBL	NaN	0

## Sheet: FSP1
Gene name	Relative enrichment (FSP1)	Significance, -log p	Significant at FDR=0.05
AIFM2 (FSP1)	19.5326	16.5122	+
AHSA1	3.03025	5.49459	+
SEC13	1.59785	4.49445	+
GNB2	1.01292	4.21367
TOMM40	3.19784	4.13732	+
ATP2A2	1.52507	4.05684	+
GPI	3.71638	3.97034	+
STRAP	3.29352	3.86667	+
CTSD	2.14107	3.74887	+
PRDX4	1.35244	3.65852
SPCS1	0.902428	3.65448
CLTC	3.55135	3.5882	+
EBP	1.15301	3.57944
GLO1	2.47856	3.56658	+
WDR1	1.3701	3.09933
CACYBP	2.68149	2.94144
ATP5J2	1.51774	2.93075
RPN1	2.56714	2.91065
MT-CO2	1.93564	2.86777
PSMB5	2.61183	2.86029
ACOT7	1.70736	2.80887
HSP90B1	2.10516	2.78518
RPA1	1.5532	2.71804
SNRPD1	2.84589	2.64235
GLUD1	1.55653	2.61145
RAB1	3.0354	2.57597
ARHGDIA	2.00609	2.56878
RBBP7	1.92642	2.55689
DDOST	1.96741	2.55395
CYB5R3	2.15701	2.50155
HSD17B10	3.07615	2.49615
SF3B3	1.97912	2.46779
PSMD3	1.2778	2.44443
RAB14	2.11594	2.42293
DYNLL1	1.53526	2.41884
IARS	1.16951	2.41233
TARS	1.64947	2.38142
ACLY	3.27541	2.37245
NPEPPS	0.922745	2.37122
FASN	3.49782	2.35669
VDAC2	2.0359	2.28731
VDAC1	2.57189	2.2728
DDX1	1.13658	2.26534
EFTUD2	1.44755	2.26294
XRCC5	2.47604	2.26065
SLC25A4	2.8562	2.24499
SCAMP2	1.03373	2.22658
PA2G4	2.31127	2.20765
HMGCS1	1.53265	2.17735
KRT18	2.35528	2.16927
PRDX2	2.14543	2.16192
GANAB	2.65811	2.16107
DDX39B	2.9285	2.16005
SPCS2	1.22906	2.146
ESYT1	0.661899	2.13143
AHCY	2.5697	2.12664
CCT7	2.37213	2.11269
PARP1	3.17033	2.10923
PRMT1	2.07272	2.10154
SLC25A5	1.44883	2.0973
GART	2.00478	2.084
GAPDH	1.85323	2.07115
HSD17B4	1.59189	2.0594
EIF4A1	2.48915	2.05393
RAN	3.18728	2.0528
TRAP1	1.37569	2.04425
SLC25A3	1.60887	2.03951
EIF3G	1.12672	2.02931
PTBP1	2.47718	2.01579
HBS1L	0.690023	2.00349
PSMB3	1.09308	1.99499
PDHA1	0.836015	1.99305
MYH9	2.20237	1.98801
TCPA	3.02156	1.9794
TUBB8	1.70497	1.94882
MPDU1	1.10221	1.90495
RAB1B	1.66292	1.90392
ATP1A1	1.37616	1.89305
HSPA4	1.4524	1.88626
EIF2S3L	2.03301	1.88606
PAICS	1.5321	1.87936
EZR	1.25133	1.86228
ALDH9A1	1.11552	1.86049
RPL9	1.71418	1.85132
MCM7	1.39076	1.85004
PGK1	2.00054	1.84447
TECR	0.97375	1.82774
PRPF19	1.28173	1.82557
PHB2	2.01727	1.82281
SNRNP40	0.677976	1.82162
FSCN1	3.06556	1.80666
ENO1	2.07359	1.77937
PRDX6	3.03038	1.77312
RPL7	1.29728	1.76951
MCM6	0.608556	1.76333
CCT6A	2.01451	1.75732
RPL38	1.16309	1.75651
SUPT16H	1.51136	1.7517
HSP90AB1	1.64781	1.75035
RAB5C	1.68	1.73053
RACK1	2.46341	1.72806
HSP90AB2P	1.65107	1.71837
EEF1A1P5	1.8464	1.71595
HDAC1	0.369068	1.691
PSMA2	1.95953	1.6844
RPL12	2.52092	1.67887
LBR	1.25049	1.67564
TUBB4B	1.96438	1.6674
EIF3B	0.492477	1.6658
BOLA2	1.49329	1.65287
USP14	1.3538	1.64681
PCNA	1.72869	1.63666
XRCC6	2.38097	1.63652
HLA-A	1.14046	1.63364
TMED7	0.753471	1.62912
MSN	2.06284	1.62416
RPL3	2.57876	1.62105
RPL5	2.73016	1.61878
HSP90AA1	2.39192	1.5993
PCBP2	1.62766	1.59736
ATIC	0.837258	1.59428
RTCB	0.961328	1.57893
DARS	1.23378	1.57892
EEF1G	2.63937	1.56869
TUBA4A	1.50722	1.5686
CDC42	1.90681	1.56793
RAB10	1.25527	1.557
UBE2D3	1.08401	1.52508
TARDBP	1.5406	1.50861
YWHAH	0.912717	1.50578
NPM1	1.40481	1.50268
RPS24	1.73911	1.49641
RALB	1.16788	1.48769
RPS3	2.60435	1.48407
PSMB6	1.09736	1.48039
PSMG1	1.26083	1.47934
VIM	1.43135	1.47818
2007-09-01	1.64482	1.47653
CCT8	1.99912	1.47462
CALR	0.789506	1.47116
RAB	0.731705	1.4686
TUBB	1.91244	1.46781
STOML2	1.04334	1.46308
ARCN1	1.52978	1.45894
PKM	2.08297	1.45797
RPL11	2.00731	1.44496
PHB	1.25207	1.4444
ARPC4-TTLL3	0.402989	1.43741
THOC6	0.90077	1.43255
RPS27L	1.73134	1.42302
NONO	2.33507	1.42238
2011-09-01	0.985045	1.42036
PPP6C	0.529382	1.41708
CAP1	1.60712	1.41287
RBBP4	0.933451	1.41204
B2M	0.948357	1.40902
DAD1	0.852673	1.39771
HNRNPU	1.91261	1.39441
DDX39A	0.849636	1.39352
RPN2	1.07912	1.38996
RPL23	2.55541	1.38665
PFN1	1.43397	1.38116
GDI2	1.9824	1.38073
TUFM	2.95574	1.3758
HNRNPUL1	1.11038	1.36388
ATP5B	1.30522	1.36225
TKT	2.10896	1.36072
HSP	0.890524	1.36024
NUP93	1.21545	1.32703
HNRNPL	2.05078	1.32029
RPL34	2.36574	1.31903
SMCHD1	0.657344	1.31501
EIF3I	1.24388	1.3039
RAB8A	0.869562	1.29263
RPS23	2.39933	1.28496
ATP5A1	1.84464	1.27816
BCAP31	0.994139	1.27647
HCFC1	0.574744	1.27291
ACO2	0.830818	1.2667
PSMB4	0.936658	1.25894
DDX6	0.725126	1.24913
ECH1	0.458225	1.24799
RALY	0.919801	1.24462
RNPEP	0.916413	1.2438
ALDH18A1	1.08957	1.23689
SNRPD3	1.01654	1.23644
FBL	1.54385	1.22268
AIFM1	1.53494	1.21857
RPL13	1.04368	1.21693
APEX1	1.30571	1.20372
SND1	1.28437	1.20266
EEF2	2.23485	1.19987
ATP5L	0.620563	1.19971
RPL7A	1.28096	1.19646
GFPT1	0.772078	1.18872
HADHA	1.25344	1.1861
HIST2H3PS2	0.887593	1.18106
PRDX1	0.975993	1.17569
LDHA	2.31963	1.16751
TRIP13	0.447198	1.16304
EIF3D	1.00611	1.15598
AKR1B1	1.0133	1.14816
EEF1A2	1.05342	1.13676
RPS6	2.12535	1.13338
RPL15	1.3834	1.12686
EIF6	0.904545	1.11585
MDH1	2.04974	1.11485
LMAN2	0.636499	1.10757
NACA	1.27571	1.10319
NARS	0.778249	1.102
RAB5B	0.385722	1.09724
BUB3	1.02277	1.09628
RPL	1.08878	1.09467
ARPC2	0.664661	1.09397
RPL10A	1.02985	1.09348
BLVRA	1.35846	1.09281
RPL21	1.34137	1.08759
TXNL1	1.51493	1.08084
FLOT2	0.800395	1.077
RPL6	1.93631	1.07635
ALDO	1.83484	1.06917
MDH2	2.21228	1.06205
MAT2A	0.855161	1.05118
MYDGF	0.719142	1.04545
CPNE3	0.750269	1.04513
SARS2	0.947859	1.02919
RCC2	1.49752	1.02774
SLC1A5	0.290935	1.01847
CAD	0.560537	1.01837
ELAVL1	1.32006	1.0149
PCBP1	1.50386	1.00562
CORO1C	0.867048	1.00283
DLD	1.684	0.996208
IGF2BP1	0.954813	0.988342
RPL27	0.949329	0.980159
RPS7	1.53478	0.97705
SURF4	0.884008	0.965684
FLOT1	0.479748	0.961012
PSMD2	0.841896	0.95543
RPL3	0.881585	0.950685
RPL22	0.880499	0.944127
TMED10	0.587422	0.942669
CFL1	0.948832	0.94187
ESD	0.637291	0.940228
RPL1	1.33051	0.934456
SMU1	0.675387	0.932761
YWHAE	0.752446	0.929558
OSTC	0.639851	0.921649
RPS14	1.78625	0.915876
SSRP1	1.04878	0.909233
RRM1	0.390554	0.908042
RPS11	1.97086	0.907346
SFXN1	0.593409	0.899222
ACTG1	0.623015	0.893749
PRDX3	0.967434	0.883076
PSMA4	0.777551	0.882135
TUBB2B	1.53488	0.878048
HACD3	1.0605	0.867949
ACAA2	1.08712	0.863511
RPS9	0.562877	0.86246
NUDT5	0.856076	0.856904
RPL28	1.84584	0.855062
H2AFY	1.05635	0.846127
RPS8	1.51656	0.837236
HSPA8	0.478494	0.837077
HNRNPA0	1.30371	0.832562
MCM4	0.520957	0.832559
KATNAL2	0.887684	0.832527
DPYSL2	0.435356	0.830679
NAA10	0.714588	0.820014
NIPSNAP3A	0.267187	0.807994
TUBA1C	0.933418	0.807662
PLP2	0.493897	0.804028
RPS15A	1.57301	0.801994
SLC16A1	0.41114	0.80096
RAB6A	1.18087	0.788371
DYNC1H1	0.305593	0.786869
GNB1	0.778385	0.785704
WDR5	0.894815	0.781314
LDHB	1.48308	0.77919
SERPINH1	1.13172	0.770802
PPIL1	0.445029	0.770739
SUCLG1	0.428927	0.770682
RAC1	1.47664	0.768449
CCT3	0.539269	0.768447
RPL27A	0.950797	0.76782
MAT2B	0.309805	0.763308
RPL13	0.930552	0.761588
ILVBL	0.537115	0.759988
RL26	0.932375	0.757318
TRA2B	1.31913	0.753361
ARF3	2.8496	0.748719
SUPT5H	0.479355	0.74541
CAPZA1	0.461005	0.743837
TIMM50	0.417353	0.740139
RPS4X	1.10042	0.718646
PABPC1	0.530174	0.710698
NSDHL	0.280956	0.70735
SUMO2	0.638931	0.703985
AKR1A1	0.649938	0.691891
TBCB	0.56862	0.691348
PGD	1.10543	0.681027
HNRNPC	1.21167	0.680799
RPL24	0.730276	0.680705
MAGOH	0.467244	0.680249
UCHL1	0.9706	0.679026
RPS20	0.991784	0.668128
SSR4	0.733937	0.661386
POLR2H	0.146771	0.658708
2009-09-01	0.393483	0.658129
RPL8	1.08604	0.646901
VCP	1.31448	0.646775
ADRM1	0.706031	0.642561
ETF1	0.243747	0.638987
PRPS1	0.592311	0.636403
ACTC1	0.685386	0.63491
RPS2	1.30935	0.634061
VARS	0.440541	0.626204
GLA	0.300369	0.623484
CCT4	1.10159	0.617262
PGAM4	0.562048	0.614301
HNRNPA1	0.803767	0.604625
RPS16	0.675769	0.596061
RAB11A	0.522769	0.587625
IDI1	0.522762	0.587053
BRIX1	0.309344	0.577989
EIF3H	0.938424	0.576544
PPIB	0.480062	0.565007
CLPTM1	0.687448	0.564621
GARS	0.710175	0.556211
PRPF8	0.540156	0.55527
SNRPF	0.427912	0.554623
NUDT19	0.690663	0.553058
CAPZB	0.927432	0.552486
TRA2A	1.3506	0.542941
RCC1	0.3985	0.541427
ARL6IP5	0.387025	0.539412
CCT5	0.527453	0.532764
MIF	0.730776	0.529891
HNRNPK	0.802281	0.520289
HNRNPH1	0.636297	0.517279
PSMA3	0.806991	0.509907
PHPT1	0.68647	0.508419
EIF4A3	0.620392	0.494321
RAB21	0.413309	0.490044
TES	0.358445	0.483802
UBA2	0.325911	0.477264
PMPCB	0.338827	0.476773
SLC25A11	0.568356	0.468503
UBA1	0.713411	0.462365
DHX9	0.906211	0.456355
MCM3	0.569145	0.450622
EIF2AK2	0.344762	0.442449
ACAT2	0.96749	0.438397
RTCA	0.166907	0.436405
PPIA	0.503428	0.435176
SNRPD2	0.759014	0.420712
HAT1	0.169679	0.404904
GOT2	0.255733	0.404188
ACAT1	0.442467	0.397111
EPRS	0.32467	0.394361
LARS	0.355212	0.390011
RAP1B	0.438066	0.388908
SNRPE	0.295892	0.386486
PFAS	0.195178	0.377802
COPG1	0.364482	0.376886
PREP	0.397696	0.376615
DHX15	0.303625	0.36983
COPB2	0.544037	0.367327
DDX3X	0.853291	0.363322
UBB	0.349977	0.361389
TIMM44	0.28338	0.360009
ATP5C1	0.195311	0.357306
RPLP0	0.317801	0.348767
RPL10	0.421689	0.320639
PDIA4	0.31951	0.318824
RAB	0.47856	0.318
A	0.194547	0.317152
CASP3	0.257913	0.310684
RPL17	0.244378	0.30961
ARF5	0.304123	0.306527
ARPC1A	0.18074	0.295589
NMT1	0.152677	0.285983
ARL8A	0.174428	0.276505
SNRNP200	0.442294	0.270374
PLD3	0.332095	0.265619
USP5	0.249736	0.261943
PGM3	0.301381	0.256999
PPP1CC	0.117975	0.256798
LAMP1	0.25361	0.253528
HIST3H3	0.267058	0.24577
VTA1	0.213107	0.24424
RPS26P11	0.263161	0.242021
FHL1	0.16003	0.239004
PSMF1	0.501627	0.237757
MARS	0.154787	0.234191
RPS3A	0.315031	0.231931
2002-09-01	0.212437	0.229994
PLRG1	0.184281	0.22483
EIF2S1	0.312554	0.224384
SDHA	0.317653	0.22332
GNAO1	1.75045	0.220646
ATP5F1	0.163991	0.218739
RPL36A-HNRNPH2	0.354743	0.218363
PTGES3	0.241851	0.21052
GGCT	0.227633	0.208464
PWP2	0.245831	0.207607
RAB7A	0.428935	0.202062
MLEC	0.0956996	0.200337
UFD1L	0.147697	0.195159
CENPV	0.254396	0.191658
EIF5A	0.199851	0.184432
NSUN2	0.286828	0.179871
PNP	0.204396	0.175863
SEC61B	0.227202	0.175041
MTDH	0.276409	0.169061
MTAP	0.156843	0.162861
YTHDF2	0.235565	0.155497
DDX17	0.153971	0.153283
CAPZA2	0.141237	0.147247
YWHAZ	0.167241	0.139807
IMPDH2	0.0818633	0.138604
HSPA9	0.158696	0.134259
G3BP2	0.105842	0.128425
FLNA	0.251756	0.12776
PSMA6	0.168708	0.123281
RAB39A	0.0663532	0.119289
PAFAH1B1	0.100746	0.116894
RPSA	0.150279	0.115947
DRG1	0.0914602	0.114129
PGAM5	0.0961014	0.106847
PSIP1	0.156503	0.0992835
MTCH1	0.138066	0.0866555
RPL18	0.144672	0.0833808
LMAN1	0.129298	0.0791518
RPS12	0.177493	0.0730319
RRAS2	0.0734433	0.0675225
STAT1	0.0740333	0.0611705
VPS29	0.0612424	0.0603823
RBM14	0.0761216	0.0535132
CSDE1	0.0418028	0.0511365
WARS	0.0361433	0.0495786
GOT1	0.0612753	0.049354
UGP2	0.0427403	0.045503
RHOC	0.106964	0.0451128
RSRC1	0.0661734	0.0374262
KPNA2	0.0597251	0.0373349
PEPD	0.0478559	0.0356095
TP53	0.0362964	0.0323235
AP3S1	0.0731853	0.0291826
ADSS	0.060714	0.027782
PNPT1	0.0269213	0.0196194
SRM	0.0189232	0.0180912
RPL37A	0.0569267	0.0180674
PPA1	0.0190512	0.0118994
RPS13	0.017821	0.0112261
HSPA7	0.0114116	0.00769662
CLIC1	0.0110738	0.00441266
HIST3H2BB	0.00645556	0.00342142
SYPL1	2.94315	0
CD81	2.4672	0
HSP90AB4P	2.19886	0
NUP43	1.77262	0
GTPBP4	1.3336	0
CSTF1	1.19868	0
LTA4H	0.995291	0
EIF3L	0.796163	0
YTHDF3	0.776256	0
CANX	0.695975	0
DNAJA1	0.66221	0
ETFA	0.510924	0
DRG2	0.438595	0
LG3BP	0.363613	0
RPL11	0.157033	0
TDRD9	0.101259	0
NIPBL	0.0351469	0
TRIM28	-0.000119368	0.000170699
HNRNPA3	-0.000193947	0.00010798
DSTN	-0.0022393	0.000869657
SAFB	-0.124116	0
IRS4	-0.125394	0
VAMP7	-0.139285	0
EXOSC4	-0.151756	0
EPPK1	-0.184504	0
HIST1H2AB	-0.233247	0
TUBB2A	-0.236468	0
CCNT1	-0.294552	0
LAGE3	-0.337155	0
RBMX	-0.393108	0
FKBP12-Exin	-0.482152	0
QARS	-0.495174	0
PDIA6	-0.509015	0
CNTLN	-0.510178	0
PNN	-0.534646	0
AIM	-0.543988	0
EBNA1BP2	-0.591466	0
HK1	-0.637396	0
KRR1	-0.638678	0
TRIP12	-0.700239	0
PPM1F	-0.744479	0
MRPS12	-0.747417	0
PABPC4	-0.75076	0
PPP1R10	-0.847215	0
ALYREF	-0.854581	0
PFN2	-0.891178	0
C9orf78	-0.896699	0
CRIPT	-0.900937	0
RAD50	-0.924827	0
SRRM2	-0.929322	0
RPS5	-1.07792	0
SPTBN1	-1.17875	0
RBM25	-1.2052	0
MRPL13	-1.34059	0
ABCE1	-1.35627	0
SON	-1.51536	0
CCNT2	-1.65064	0
BASP1	-2.35037	0
ZC3H13	-2.43217	0
PSMC5	-6.85223	0
NOL3	-6.96487	0
ARL17B	-7.73348	0
PRKDC	-0.012809	0.00396613
UQCRC1	-0.00796783	0.0080149
RPF2	-0.0226313	0.0106505
RPL14	-0.0169845	0.0119975
AASDHPPT	-0.02705	0.0184819
PSMC2	-0.0289123	0.0216423
ANXA2	-0.0257892	0.0237157
ACIN1	-0.0535623	0.0260408
LUZP1	-0.0564856	0.0275546
CKB	-0.0454939	0.0276007
HNRNPR	-0.0256313	0.0300291
TMEM263	-0.0644091	0.0341156
SHMT2	-0.0373126	0.0377224
DCD	-0.0664839	0.0377983
KHDRBS1	-0.073334	0.0426431
CBX3	-0.109076	0.0450205
AP1S2	-0.0618595	0.046847
NUFIP2	-0.0686447	0.0535669
NUCKS1	-0.109091	0.0539922
TOP	-0.0899756	0.0562065
ACSL3	-0.0776318	0.0603236
HSPA5	-0.0307866	0.0754518
RAB27A	-0.116885	0.0764954
DDX5	-0.0480852	0.0768345
SRP14	-0.0730362	0.0769891
H2BFS	-0.201627	0.0794053
PPIL4	-0.104943	0.0801479
RSL1D1	-0.109634	0.0838933
DDX46	-0.387115	0.084949
FARSA	-0.0666389	0.0875143
PDXK	-0.0674169	0.0894684
C21orf33	-0.152899	0.0897471
MC	-0.0628337	0.0904642
PSMD14	-0.0566343	0.0950515
PDHB	-0.104506	0.0954486
TWF1	-0.0907358	0.0959099
DDB1	-0.165809	0.096119
PSMA7	-0.110561	0.0998073
SRSF6	-0.129629	0.106074
ILF3	-0.185442	0.106705
SNRPB	-0.249229	0.110654
NOP2	-0.156778	0.113545
ALDOC	-0.105139	0.114579
PPP1R8	-0.1526	0.11813
DKC1	-0.11827	0.118393
CBR1	-0.258303	0.119012
NCL	-0.170192	0.126709
SMCA5	-0.31703	0.128109
HIST1H2BO	-0.250105	0.137931
CWC22	-0.349905	0.15275
M6PR	-0.28991	0.155469
SRRM2	-0.491937	0.156814
GSTP1	-0.14045	0.157604
HMGN3	-0.326451	0.157892
RBM15	-0.223077	0.161231
SRSF1	-0.284109	0.165836
PRPF4	-0.242688	0.168341
RUVBL2	-0.21761	0.168687
PARK7	-0.17773	0.169321
DYNC1I2	-0.177882	0.172603
MDK	-0.255777	0.177175
CARHSP1	-0.280061	0.179839
U2AF1L5	-0.178847	0.180261
P4HB	-0.420834	0.190409
H2AFJ	-0.330226	0.191482
SUB1	-0.434099	0.192178
MCM2	-0.114772	0.195102
LUC7L3	-0.315101	0.199173
HMGA2	-0.322446	0.202435
EIF5B	-0.381317	0.209245
RHOG	-0.184872	0.21271
HIST1H4A	-0.417842	0.220531
RECQL	-0.241137	0.22265
RPS28	-0.331801	0.223169
HM13	-0.274246	0.224461
SFPQ	-0.154099	0.225659
PPP1CA	-0.365263	0.239251
WDR77	-0.208035	0.254139
PRPS2	-0.328194	0.254801
ERVFC1	-0.313848	0.256419
TXN	-0.430079	0.269005
ABL1	-1.71008	0.273509
TXNDC5	-0.174574	0.275157
DDX42	-0.492961	0.277682
PSMC1	-2.09946	0.285736
HNRNPD	-0.343245	0.299289
NEDD8	-0.36193	0.301598
GNAI2	-2.75058	0.315445
HMGXB4	-0.256074	0.315916
HMGA1	-0.479495	0.316526
PRMT5	-0.16545	0.317617
AP3D	-0.545893	0.317854
PC	-0.43497	0.319144
TMA7	-0.441552	0.325282
RPL31	-0.289467	0.329445
CHAF1B	-0.266771	0.336611
HSPD1	-0.359942	0.341772
GRN	-0.334578	0.349841
CDK12	-0.477457	0.35036
RPS25	-0.493311	0.350779
SRSF7	-0.398363	0.35382
FKBP4	-0.28745	0.354003
GNAI3	-4.57301	0.356333
CHERP	-0.532884	0.357109
PCCA	-0.478004	0.367746
MANF	-1.00199	0.370795
ST3GAL3	-0.398228	0.371357
PSAT1	-0.597115	0.376485
SREK1	-0.385065	0.384985
RPA2	-0.412128	0.398704
UQCRFS1P1	-0.316923	0.40638
HNRNPM	-0.271285	0.407821
NME1-	-0.493612	0.420858
SRSF12	-0.383638	0.42091
EIF2A	-0.369851	0.427601
DDX23	-0.496482	0.430203
TIGAR	-0.615014	0.43091
CRKL	-0.73717	0.431144
ZC3HAV1	-0.341193	0.442751
PSMD4	-0.394737	0.44944
SNRNP70	-0.655774	0.458293
PPIG	-1.37437	0.460698
GSPT1	-0.485259	0.464201
NOP58	-0.570546	0.466383
FUS	-0.586237	0.507775
OSBP	-0.317991	0.518595
PLEC	-0.383304	0.519931
MCCC1	-0.441524	0.521033
NSRP1	-0.66101	0.526994
HIST2H2BF	-0.542183	0.530902
IMMT	-0.496539	0.542823
HNRNPAB	-0.50263	0.543962
TPI1	-0.477884	0.546561
HN1L	-0.564312	0.546661
SRSF10	-0.494659	0.546834
ARGLU1	-0.598884	0.550862
H1FX	-0.522936	0.56574
TRIM25	-0.407395	0.567101
PTN	-0.914802	0.567644
CPPED1	-0.378099	0.572487
MAPK1IP1L	-0.443568	0.579004
BRD4	-0.889817	0.579625
BPNT1	-0.474668	0.587372
PIN4	-0.562894	0.588117
ZNF207	-0.473272	0.602571
FIP1L1	-0.460793	0.616121
U2SURP	-0.583833	0.622202
SRSF3	-0.577079	0.629724
ABCB9	-0.549178	0.634397
NOP56	-0.654813	0.641022
SRC	-5.79256	0.648076
FAU	-0.589564	0.650045
ILKAP	-0.917871	0.65741
CCDC124	-0.660946	0.667997
CCT	-0.564125	0.675115
HMGB1	-1.29777	0.683688
ARL6IP4	-0.684823	0.68567
TOP1	-0.565513	0.687492
HNRNPA2B1	-0.417479	0.712789
DDX21	-0.592769	0.715657
SRPRB	-0.940013	0.726294
PRPF38B	-0.692252	0.733935
COLGALT1	-0.386315	0.740101
ANKHD1	-0.789513	0.744626
SOD1	-0.814508	0.751296
LLPH	-0.750503	0.762906
C7orf55-LUC7L2	-0.575697	0.772299
HMGB2	-0.982352	0.78555
SLI	-1.4861	0.79852
HMGN1	-1.25949	0.801264
RPL32	-0.685251	0.820201
KHSRP	-0.561774	0.822887
MMTAG2	-0.899684	0.832964
ABCF1	-0.584496	0.838
SRRM1	-1.10697	0.853272
SERBP1	-0.77686	0.856183
NOLC1	-0.811599	0.858779
RPL23A	-0.682898	0.861028
RPS21	-0.763818	0.86726
SRSF2	-1.0066	0.88094
HMGN2	-0.758432	0.890882
LUC7L	-0.801607	0.894939
EDF1	-0.9417	0.920961
SRSF11	-0.612322	0.932144
RPL4	-0.497167	0.938242
RPL29	-0.808163	0.945318
AKAP17A	-1.01107	0.97209
CBX5	-0.879071	0.973458
PRPF38A	-0.703788	1.01986
RBM39	-0.608284	1.02308
PDIA3	-0.707447	1.05204
SERPINB6	-0.324739	1.05364
RP9	-1.11317	1.05492
PAFAH1B3	-1.89897	1.08352
CPSF6	-0.863551	1.09499
HIST1H1C	-1.04035	1.13024
TCOF1	-1.20375	1.13397
BRD3	-1.35791	1.16991
RNH1	-1.54214	1.21251
HIST1H1D	-0.850137	1.24951
CIR1	-1.55709	1.25017
NKAPL	-0.798421	1.27417
RBMX2	-0.855528	1.2803
PRPSAP2	-0.515674	1.28237
SNRNP27	-0.969931	1.28438
PRPF40A	-0.875048	1.28591
RABL6	-0.987061	1.32777
DEK	-0.940058	1.33568
CSRP1	-0.469374	1.35648
SOS1	-0.743835	1.36627
MMP10	-0.904474	1.42717
HMGN4	-0.998896	1.47521
TAGLN2	-1.11197	1.48382
DIDO1	-1.14774	1.51309
SART1	-1.21673	1.53472
ELOF1	-1.06047	1.54546
THOC2	-1.21641	1.55365
MED1	-1.40568	1.68768
U2AF2	-1.03175	1.68953
SERF2	-1.4733	1.69744
RDX	-0.635679	1.69971
TBC1D10B	-1.34513	1.70371
ICA1L	-0.894982	1.73206
RNPS1	-1.36267	1.76368
SGPL1	-0.617892	1.76997
PRPF4B	-1.60536	1.84254
PHF3	-1.07574	1.85775
THOC2	-0.784929	1.86528
CLPX	-0.97533	1.96707
H3BRB0	-1.35625	1.98581
C19orf53	-1.87221	2.08923
COX17	-1.6787	2.13662
SREK1IP1	-1.29478	2.15912
HINT2	-0.908474	2.19245
STEAP1	-1.24724	2.23892
LTV1	-1.38786	2.30826
RSRC2	-1.24591	2.31865
U2AF2	-1.01655	2.70317
PSMB1	-1.27284	2.73657

## Sheet: SRC
Gene name	Relative enrichment (SRC)	Significance, -log p	Significant at FDR=0.05
SRC	19.5	15.4	+
KHDRBS1	2.11	4.66	+
HNRNPK	2.85	4.49	+
SUMO2	1.26	2.05
ACIN1	-1.83	2
SNRPF	0.86	1.83
TRIM28	-0.53	1.74
TOMM40	2.49	1.69
SFPQ	0.65	1.66
VIM	1.48	1.58
ACTC1	1.26	1.55
HNRNPH1	1.33	1.55
PPP1R10	1.98	1.52
DDX17	0.83	1.5
RPL18	1.34	1.48
SLC25A3	1.6	1.47
RPSA	1.25	1.45
EIF3D	1.4	1.42
HNRNPA3	1.25	1.38
RAB7A	-1.76	1.32
UBA1	-1.5	1.32
RPS26P11	0.91	1.31
HNRNPA1	1.35	1.31
PRPF8	1.17	1.3
RPL21	1.82	1.3
SLC25A11	1.36	1.29
RPL31	0.76	1.27
AKAP17A	-1.47	1.27
HNRNPA2B1	0.6	1.26
KRT18	1.68	1.24
LBR	1.25	1.2
EPRS	-0.87	1.2
GNAO1	-6.02	1.15
NSUN2	-1.34	1.14
FLOT1	0.53	1.13
SEC13	-1	1.12
HSPA7	0.91	1.11
PNP	-0.77	1.11
NIPBL	1.03	1.1
ERVFC1	-1.08	1.09
NONO	1.99	1.09
TUBB2B	-1.81	1.07
RBM14	0.85	1.07
HIST1H1C	1.2	1.06
H2BFS	-1.61	1.05
SDHA	0.79	1.03
IGF2BP1	1.2	1.03
HSPA9	0.79	1.03
BUB3	1.19	1.02
DDX1	-0.89	1
PARP1	2.04	1
HIST3H3	0.77	1
GOT2	0.58	0.99
DYNC1I2	0.83	0.99
RPS27L	1.7	0.98
SNRPD1	1.96	0.98
MAGOH	0.73	0.95
RPL38	-1	0.95
DEK	-0.71	0.94
RPL1	1.36	0.94
HSP	0.69	0.91
DDX3X	1.66	0.9
RCC2	1.37	0.9
RPS11	1.98	0.9
HNRNPU	1.45	0.9
USP14	-1.12	0.89
SRSF2	-1.02	0.89
NOP2	0.68	0.89
MYH9	1.32	0.88
EPPK1	0.82	0.87
PHB	-0.91	0.87
RPL3	1.72	0.85
TXNDC5	0.41	0.83
RPL11	1.71	0.82
RPN1	1.24	0.82
CAP1	1.13	0.81
ABCF1	-0.58	0.81
RPL8	1.25	0.8
RSRC1	-0.9	0.8
HIGD1A	1.04	0.8
XRCC6	1.52	0.8
TUBB8	-1.23	0.8
SNRNP70	1	0.8
ATP5B	0.93	0.79
PCBP1	1.29	0.79
PHPT1	1.13	0.78
RPS9	0.54	0.78
ST3GAL3	-0.84	0.77
CACYBP	-1.24	0.77
RPL7A	0.95	0.75
HSPA4	-1.01	0.75
A	-0.37	0.74
SPCS1	0.43	0.73
SLC25A5	0.92	0.73
DLD	1.66	0.71
ZC3HAV1	0.56	0.71
PGAM5	0.54	0.69
RRAS2	-0.52	0.69
SFXN1	-0.57	0.69
NMT1	0.37	0.67
PRMT5	0.29	0.67
DDX21	0.58	0.67
NUCKS1	-0.92	0.67
RPS23	1.57	0.66
MED1	0.77	0.66
MAT2A	-0.66	0.66
TKT	1.32	0.66
EIF4B	0.58	0.65
RL26	0.84	0.64
RPS7	1.15	0.64
KPNA2	0.7	0.63
HNRNPL	1.24	0.63
RPL5	1.82	0.63
RPS8	1.23	0.63
RUVBL1	-0.58	0.62
ALDO	1.27	0.62
RAN	1.48	0.62
RPL27A	1	0.62
HSD17B10	1.27	0.6
DYNLL1	-0.68	0.6
RPL12	1.29	0.6
PLRG1	0.41	0.6
HIST2H3PS2	0.57	0.59
RPS21	0.57	0.59
CLPX	-0.43	0.58
SEC61B	0.6	0.58
ACTG1	0.47	0.58
YTHDF2	0.64	0.57
RPL34	1.36	0.57
HNRNPA0	1	0.56
CNTLN	0.77	0.56
RPL6	1.24	0.56
SRPRB	-0.81	0.56
PRMT1	1.08	0.55
SUPT5H	0.4	0.55
CALR	-0.43	0.55
H2AFJ	0.77	0.55
TXNL1	-1.16	0.54
HSP90AA1	1.17	0.54
PDIA3	0.46	0.54
ZC3H13	-2.71	0.54
GLUD1	0.72	0.54
COPA	0.86	0.54
FUS	-0.62	0.54
DDOST	0.88	0.53
SRSF7	-0.66	0.53
RPS3	1.32	0.53
FAU	-0.5	0.53
ACSL3	0.52	0.53
EIF4A1	1.02	0.53
EEF2	1.27	0.52
HIST1H4A	0.84	0.52
CCT5	0.53	0.52
TUBB	0.96	0.52
SLI	1.05	0.52
PSMC2	-0.5	0.51
CBX3	-0.89	0.51
ARGLU1	-0.53	0.51
PRPF40A	-0.44	0.51
RACK1	1.09	0.51
SRSF8	-0.62	0.51
SRSF11	-0.39	0.5
EIF5A	-0.45	0.5
SSR4	0.71	0.5
EEF1G	1.24	0.5
AHCY	0.99	0.5
PTGES3	0.5	0.49
SLC25A4	1.06	0.49
RPL13	0.57	0.49
C19orf53	0.73	0.49
HMGN4	-0.46	0.48
TRA2B	0.98	0.48
FASN	1.25	0.48
RPL28	1.22	0.48
RBM15	0.41	0.47
ATP5A1	0.94	0.47
RPS25	-0.77	0.47
RPL22	0.54	0.47
SRSF12	-0.42	0.47
DSTN	-0.75	0.47
ILKAP	-0.76	0.47
CLTC	1.02	0.47
LUC7L	-0.5	0.46
KATNAL2	-0.61	0.46
RPS16	0.57	0.46
TMEM263	-0.62	0.46
BLVRA	-0.92	0.46
RBBP4	0.52	0.46
HMGN3	0.77	0.45
HSP90AB1	0.67	0.45
SNRNP200	0.68	0.45
U2AF1L5	0.38	0.45
SRSF1	-0.61	0.44
GRN	-0.47	0.44
PA2G4	0.8	0.43
PGD	-0.96	0.43
PLP2	0.4	0.43
SRSF6	0.52	0.43
GAPDH	0.65	0.43
RPS20	0.89	0.43
ACLY	1.07	0.43
EZR	-0.54	0.42
GNAI3	-5.2	0.42
HNRNPUL1	0.5	0.42
SND1	-0.64	0.42
PSMA6	0.48	0.42
FSCN1	1.13	0.41
MTDH	-0.69	0.41
HCFC1	0.33	0.41
CYB5R3	0.67	0.41
NOLC1	0.47	0.4
GNB1	0.49	0.4
NPM1	0.58	0.4
EIF3H	0.6	0.4
DNAJA1	-0.32	0.39
LDHA	1.09	0.39
RPL15	0.64	0.39
G3BP2	0.27	0.38
ATP5F1	-0.3	0.38
RPL	-0.64	0.38
PKM	0.82	0.38
PLEC	-0.29	0.38
HNRNPC	0.78	0.37
RPL29	0.41	0.37
GANAB	0.81	0.36
EIF3L	-0.36	0.36
RPS4X	0.66	0.36
RPL7	0.53	0.36
PHB2	0.67	0.35
MARS	-0.25	0.35
U2SURP	-0.36	0.35
ELAVL1	0.63	0.35
APEX1	0.56	0.35
TMA7	-0.47	0.34
RBMX2	-0.33	0.34
ANKHD1	-0.43	0.34
EIF5B	-0.57	0.34
UQCRC1	0.31	0.34
CCT6A	0.65	0.33
HIST1H1D	0.34	0.33
2011-09-01	0.45	0.33
TXN	-0.51	0.33
C7orf55-LUC7L2	-0.29	0.33
HSPA8	0.24	0.33
PSMA2	0.63	0.32
PPA1	-0.47	0.32
PCNA	0.57	0.32
PAICS	-0.47	0.32
MDH2	0.94	0.32
RPL17	0.21	0.32
ALDOC	-0.32	0.32
LMAN2	0.31	0.32
PRDX3	0.47	0.32
WDR1	-0.38	0.31
SREK1IP1	-0.35	0.31
SRRM1	0.64	0.31
CCDC124	-0.37	0.31
DHX9	0.68	0.31
EFTUD2	-0.39	0.31
TUBA1C	-0.56	0.31
MSN	0.64	0.31
RPL9	0.5	0.3
TCPA	0.84	0.3
PEPD	0.25	0.3
CCT7	0.63	0.3
SOS1	-0.31	0.3
PRPF19	0.46	0.3
TUBB4B	0.6	0.3
SNRPD3	0.37	0.3
HMGN1	0.6	0.29
PPIB	-0.28	0.29
SUB1	-0.52	0.29
SLC16A1	-0.21	0.29
ARCN1	0.51	0.29
STEAP1	-0.3	0.29
CAPZB	0.58	0.29
GNB2	-0.24	0.28
GNAI2	-3.08	0.28
RPL4	-0.21	0.28
MCM7	0.47	0.28
DHX15	0.3	0.28
FLNA	0.5	0.27
RTCB	0.28	0.27
H3BRB0	0.34	0.27
ACAA2	0.57	0.27
NCL	-0.33	0.27
CAPZA1	-0.26	0.26
DDX42	-0.47	0.26
VDAC2	0.56	0.26
RPS3A	0.34	0.26
HIST1H2AB	-0.23	0.26
SREK1	-0.28	0.26
AIFM1	0.52	0.26
CLIC4	0.42	0.26
RPL13	0.41	0.26
RAB	-0.27	0.26
PFN1	0.43	0.26
SRSF10	-0.26	0.26
RPL23	0.75	0.25
EIF2S3L	0.61	0.25
ARL6IP4	-0.3	0.25
TUFM	0.86	0.24
SUCLG1	-0.22	0.24
GLO1	-0.43	0.24
BRD3	0.43	0.24
CKAP4	-0.39	0.24
MMP10	-0.25	0.24
PSAT1	-0.52	0.24
PSMD3	-0.34	0.24
PGK1	-0.47	0.23
MCCC1	-0.23	0.23
VARS	0.18	0.23
DIDO1	0.36	0.23
PPIA	-0.31	0.23
PSMB6	-0.29	0.23
SERPINH1	0.57	0.23
GFPT1	-0.29	0.23
UBE2D3	-0.35	0.23
HNRNPD	0.27	0.23
HIST3H2BB	-0.35	0.22
CDC42	0.48	0.22
MDH1	-0.64	0.22
LDHB	0.58	0.22
SRRM2	-0.67	0.22
EEF1A1P5	0.43	0.22
RPL36A-HNRNPH2	0.35	0.22
CAD	-0.22	0.22
RPS12	-0.59	0.22
RBBP7	0.44	0.22
SRRM2	-0.39	0.21
ILF3	-0.33	0.21
RNPS1	0.3	0.21
VCP	-0.56	0.21
SERBP1	0.22	0.21
UBB	0.22	0.2
NME1-	0.28	0.2
PTN	0.33	0.2
PSMB3	-0.26	0.2
HIST1H2BO	0.35	0.2
NSDHL	-0.13	0.2
ENO1	0.43	0.2
LUC7L3	-0.26	0.2
DDX46	-0.84	0.2
RAB1	0.51	0.2
PRKDC	-0.53	0.19
RAB5C	0.35	0.19
MDK	-0.26	0.19
CNP	-0.5	0.19
RPL27	0.27	0.19
PABPC1	-0.19	0.19
BCAP31	0.29	0.19
PSMD2	0.24	0.19
DDX39B	0.51	0.18
NACA	0.34	0.18
TARS	-0.28	0.18
RPS2	0.5	0.18
HN1L	0.22	0.18
CBX5	0.24	0.18
ZNF207	0.18	0.18
PSMB1	0.23	0.18
NPEPPS	-0.2	0.18
DKC1	-0.17	0.18
STRAP	0.42	0.18
SOD1	-0.31	0.18
DDX6	-0.19	0.18
GDI2	0.53	0.18
RRM1	0.14	0.17
PRDX2	0.36	0.17
TUBA4A	0.3	0.17
DCD	0.27	0.17
PRDX4	0.16	0.17
RSL1D1	0.24	0.17
HSP90B1	0.3	0.17
MT-CO2	0.27	0.16
GPI	-0.43	0.16
RAB14	-0.38	0.16
EIF3I	0.26	0.16
KHSRP	0.19	0.16
HLA-A	-0.24	0.16
RPS14	0.46	0.16
ANXA2	0.18	0.16
SMU1	-0.17	0.16
SURF4	0.23	0.16
RPL11	-0.16	0.16
CARHSP1	-0.25	0.15
ARL8A	-0.13	0.15
RAB21	0.19	0.15
ADRM1	0.23	0.15
EIF2S1	0.27	0.15
DARS	0.27	0.15
SRSF3	-0.18	0.15
CIR1	0.26	0.15
PGAM4	0.18	0.15
PIN4	0.22	0.15
MCM3	0.24	0.15
HIST2H2BF	-0.19	0.15
ALYREF	0.19	0.14
ATP5C1	-0.09	0.14
LAGE3	-0.46	0.14
ACOT7	0.25	0.14
EIF6	0.19	0.14
CCT8	0.35	0.14
NUP93	-0.26	0.14
THOC2	-0.19	0.14
TRAP1	-0.2	0.14
EBP	0.15	0.14
SUPT16H	0.28	0.14
LLPH	0.22	0.13
PRPF38A	0.14	0.13
IARS	0.19	0.13
HNRNPM	-0.09	0.13
FBL	-0.29	0.13
PPIG	0.4	0.13
TOP1	-0.14	0.13
CWC22	0.28	0.13
LUZP1	-0.28	0.12
PPIL4	-0.15	0.12
ESYT1	-0.09	0.12
MIF	-0.23	0.12
EIF3B	0.07	0.12
SF3B3	0.27	0.12
HMGA1	-0.25	0.12
SSRP1	0.26	0.12
RPL24	-0.18	0.12
PARK7	-0.16	0.12
ICA1L	0.12	0.12
CTSD	-0.19	0.11
RPL23A	0.14	0.11
RPS6	0.35	0.11
CHERP	-0.18	0.11
ALDH18A1	0.17	0.11
RAB1B	0.24	0.11
PSMC1	-0.92	0.11
CDK12	-0.17	0.1
RBM39	-0.1	0.1
CCT4	0.32	0.1
ARF3	-0.59	0.1
TARDBP	0.2	0.1
RCC1	0.13	0.1
UQCRFS1P1	0.13	0.1
FLOT2	-0.1	0.1
RAC1	0.3	0.1
HADHA	-0.22	0.1
ATP2A2	-0.14	0.1
RSRC2	-0.12	0.1
MCM4	-0.12	0.1
RPL10A	-0.16	0.1
YWHAE	-0.12	0.1
RAB8A	0.14	0.1
CORO1C	0.14	0.09
RAB11A	-0.14	0.09
AP1S2	0.12	0.09
PTBP1	0.23	0.09
FIP1L1	-0.09	0.09
NAA10	-0.15	0.09
PSMA4	-0.12	0.08
RPLP0	0.11	0.08
DDX23	-0.12	0.08
PDIA4	-0.1	0.08
CHAF1B	-0.09	0.07
ARPC4-TTLL3	0.05	0.07
TPI1	0.09	0.07
SGPL1	0.07	0.07
RAB10	-0.12	0.07
BOLA2	0.13	0.07
SERF2	0.12	0.07
CCT3	-0.09	0.07
RDX	0.06	0.07
TBC1D10B	0.11	0.07
ATIC	0.07	0.07
TRA2A	-0.23	0.07
H2AFY	-0.13	0.06
PSMB5	0.15	0.06
ATP1A1	0.1	0.06
HBS1L	-0.06	0.06
PCBP2	0.13	0.06
CCNT2	0.1	0.06
LAMP1	-0.09	0.06
NOP56	-0.09	0.06
RPS15A	-0.19	0.06
PC	0.1	0.06
SHMT2	0.05	0.06
TIMM50	-0.06	0.06
IRS4	0.09	0.06
EDF1	-0.09	0.05
NOP58	-0.09	0.05
PRDX1	0.08	0.05
MMTAG2	-0.07	0.05
EIF3G	-0.07	0.05
NARS	-0.06	0.05
2002-09-01	-0.07	0.05
SPCS2	0.07	0.05
SNRPB	0.14	0.05
NSRP1	0.08	0.05
HNRNPAB	0.07	0.04
ACAT1	-0.08	0.04
TAGLN2	0.06	0.04
RNPEP	-0.07	0.04
EIF4A3	0.09	0.04
TOP	-0.07	0.04
RPL10	-0.07	0.04
HMGB1	-0.12	0.04
RPL32	0.05	0.04
RPS13	0.06	0.04
LMAN1	-0.08	0.04
CPSF6	0.05	0.04
PSMA7	-0.06	0.04
RP9	0.07	0.04
PCCA	-0.06	0.04
XRCC5	0.1	0.04
CKB	-0.06	0.04
U2AF2	0.04	0.03
VDAC1	0.1	0.03
PLD3	0.06	0.03
RPS24	0.07	0.03
CFL1	0.05	0.03
HMGA2	-0.05	0.03
RPA1	0.04	0.03
NKAPL	0.03	0.02
IMPDH2	0.02	0.02
RBMX	0.04	0.02
FKBP4	0.02	0.02
WDR5	0.04	0.02
RPL14	-0.03	0.02
HMGN2	0.03	0.02
RPS28	0.03	0.02
PRPF38B	-0.03	0.02
RAP1B	-0.03	0.02
EIF2A	0.02	0.02
C9orf78	-0.03	0.02
SNRPD2	0.04	0.02
ARHGDIA	0.03	0.02
SART1	0.03	0.02
DDX5	0.01	0.01
PRDX6	0.05	0.01
SCAMP2	-0.02	0.01
HSD17B4	0.03	0.01
2007-09-01	-0.02	0.01
HMGCS1	0.02	0.01
GART	-0.02	0.01
2009-09-01	0.01	0.01
MYDGF	-0.01	0.01
RHOC	-0.01	0
SNRNP27	-0.01	0
H1FX	0	0
AKR1B1	0	0
RUVBL2	0	0
TCOF1	0	0
HSPD1	0	0
U2AF2	NaN	0
GNAO1	NaN	0
THOC2	NaN	0
PSMC1	NaN	0
TCEB3	NaN	0
COPG1	0.85	0
HDGFRP3	-0.59	0
PPIL1	-0.73	0
DRG1	NaN	0
FARSA	NaN	0
MCTS1	0.4	0
RALY	NaN	0
NUDT5	NaN	0
STOML2	NaN	0
HMGXB4	NaN	0
TES	0.84	0
NIPSNAP3A	NaN	0
UBA2	0.46	0
VPS29	-0.58	0
nef	NaN	0
LARS	-0.55	0
HACD3	NaN	0
CRIPT	NaN	0
MAT2B	-0.01	0
MTCH1	0.11	0
TECR	NaN	0
FAM49B	NaN	0
SMC4	NaN	0
OSTC	NaN	0
AASDHPPT	-0.7	0
TIGAR	NaN	0
EXOSC4	-0.14	0
SARS2	NaN	0
VTA1	NaN	0
ABCB9	NaN	0
C12orf10	NaN	0
NRDE2	0.84	0
RPF2	0.38	0
PNN	NaN	0
WDR33	NaN	0
GTPBP4	NaN	0
MRPL13	NaN	0
AP1M1	0.62	0
HINT2	NaN	0
ACAT2	NaN	0
PSMG3	NaN	0
AIFM2	NaN	0
CPPED1	NaN	0
WDR77	0.25	0
ELAC2	NaN	0
EBNA1BP2	-0.51	0
ACO2	0.45	0
CHP1	NaN	0
TBCB	0.28	0
LTV1	NaN	0
SNRNP40	0.28	0
EMG1	0.23	0
UFD1L	0.29	0
RAD50	NaN	0
ARPC1A	NaN	0
PHF3	0.91	0
AP3S1	-0.67	0
PSMF1	1.24	0
BRIX1	NaN	0
HM13	NaN	0
PNPT1	0.4	0
NUP43	NaN	0
BOD1L1	NaN	0
TDRD9	NaN	0
MAPK1IP1L	NaN	0
COLGALT1	0.1	0
CDKN2A	0.24	0
ARL17B	NaN	0
TMED7	-0.27	0
THOC6	NaN	0
ZC3H18	NaN	0
CENPV	0.51	0
YTHDF3	1.93	0
NUFIP2	NaN	0
HSP90AB2P	NaN	0
HSP90AB4P	NaN	0
RABL6	1.53	0
IMMT	NaN	0
UGP2	1.03	0
HIST2H2AA3	NaN	0
SYPL1	-1.39	0
DPYSL2	-0.57	0
DDB1	-0.23	0
NEDD8	-0.36	0
SLC1A5	0.06	0
TRIP13	NaN	0
SAFB	0.64	0
RAB	-1	0
PWP2	NaN	0
PAFAH1B3	NaN	0
PDIA6	NaN	0
RAB39A	NaN	0
MESDC2	NaN	0
TRIP12	0.4	0
MCM6	NaN	0
TRIM25	-0.18	0
DYNC1H1	NaN	0
MLEC	-0.15	0
EIF3A	NaN	0
COX17	1.22	0
IDI1	0.36	0
TUBB2A	0.14	0
FHL1	-0.39	0
KRR1	NaN	0
HDAC1	-0.16	0
PRPF4B	-0.36	0
PABPC4	NaN	0
MTAP	0.13	0
ACACA	-0.58	0
ECH1	-0.34	0
PPP1R8	-0.4	0
AIM	NaN	0
TWF1	NaN	0
LG3BP	NaN	0
EEF1A2	-0.35	0
CSTF1	NaN	0
YWHAH	-0.67	0
SPTBN1	NaN	0
RHOG	-0.17	0
ARF5	0.44	0
BASP1	-2.68	0
CCT	0.01	0
PAFAH1B2	NaN	0
YWHAZ	NaN	0
FKBP12-Exin	-0.13	0
ETF1	NaN	0
SNRPE	NaN	0
PSMC5	-6.37	0
NCS1	NaN	0
PPP1CA	2.14	0
DAD1	0.13	0
B2M	NaN	0
HSPE1	NaN	0
RPL37A	0.59	0
ABCE1	0.56	0
RAB5B	0.24	0
PRPS1	0.17	0
CD81	NaN	0
ELOF1	NaN	0
ATP5J2	0.7	0
MANF	NaN	0
DRG2	NaN	0
PSMD4	0.75	0
POLR2H	-0.09	0
VAMP7	NaN	0
PSMD7	NaN	0
RAB27A	0.26	0
RBM25	-1.03	0
TMED10	0.2	0
MCM2	0.08	0
PPM1F	NaN	0
ALDH9A1	0.58	0
PREP	NaN	0
QARS	3.35	0
CAPZA2	1.21	0
RPS5	NaN	0
CRKL	0.51	0
RECQL	NaN	0
USP5	1.46	0
PAFAH1B1	0.15	0
CASP3	-0.04	0
STAT1	NaN	0
TMPO	-0.06	0
GARS	-0.04	0
TALDO1	-0.49	0
SRP14	-0.34	0
PPP1CC	0.51	0
COPB2	NaN	0
SERPINB6	NaN	0
PFN2	-0.43	0
MC	0.53	0
ADSS	NaN	0
NKTR	NaN	0
C21orf33	NaN	0
PSMB4	NaN	0
CANX	NaN	0
HMGB2	-1.51	0
PSMA3	NaN	0
WARS	NaN	0
OSBP	0.16	0
CSRP1	0.08	0
M6PR	0.18	0
RAB6A	-2.03	0
SRM	-0.01	0
EIF2AK2	0.27	0
HK1	0.1	0
SON	NaN	0
RPL3	0.83	0
CTPS1	NaN	0
GOT1	NaN	0
HMGA1	NaN	0
CBR1	-0.55	0
RPA2	NaN	0
GSPT1	0.61	0
AKR1A1	NaN	0
ETFA	NaN	0
RNH1	NaN	0
gag	NaN	0
PRPS2	-0.72	0
RALB	NaN	0
PDHB	NaN	0
HSPA5	NaN	0
ESD	NaN	0
LTA4H	NaN	0
UCHL1	1.49	0
SNRPA1	0.01	0
GSTP1	0.03	0
PDHA1	NaN	0
P4HB	-1.27	0
PTMA	0.14	0
GLA	-0.4	0
RPN2	0.56	0
TP53	0.21	0
ABL1	NaN	0
HPRT1	NaN	0
CLPTM1	-0.43	0
BPNT1	NaN	0
PSMG1	1.27	0
AHSA1	-0.82	0
PGM3	1.16	0
ENDOD1	NaN	0
ATP5L	-0.13	0
ARL6IP5	NaN	0
RP2	-5.43	0
CSDE1	0.14	0
PSIP1	0.17	0
PMPCB	0.04	0
MPDU1	0.12	0
GGCT	0.38	0
CPNE3	0.41	0
NOL3	NaN	0
CUTA	NaN	0
BRD4	-0.08	0
CCNT1	0.37	0
SMCA5	NaN	0
PRPSAP2	0.15	0
TIMM44	NaN	0
HNRNPR	NaN	0
PRPF4	NaN	0
PPM1G	NaN	0
MRPS12	NaN	0
ARPC2	0.99	0
PFAS	0.49	0
HAT1	NaN	0
AP3D	NaN	0
PDXK	0.45	0
PPP6C	NaN	0
PSMD14	NaN	0
RTCA	NaN	0
IGF2BP3	0.12	0
CLIC1	-1.34	0
DDX39A	NaN	0
NUDT19	NaN	0
SMCHD1	NaN	0
ILVBL	NaN	0

## Sheet: mCitrine
Gene name	Relative enrichment (mCitrine)	Significance, -log p	Significant at FDR=0.05
GARS	3.24079	0
CRKL	2.5474	0
DHX9	2.13487	1.60405
DDB1	1.98236	0
HSP90AB4P	1.86971	0
ACAT2	1.75566	0
STAT1	1.46116	0
TUBB2B	1.3539	0
HMGN1	1.34294	0.88012
MED1	1.11267	0.865501
PGM3	1.10452	0
HSPA4	1.07445	0
SNRNP200	1.0382	0.845234
TMEM263	1.02749	0.678696
CCT7	1.00386	0.434281
CCT3	0.965358	0
MCM7	0.939557	0
DLD	0.933564	0.339062
AHCY	0.925899	0.45636
C19orf53	0.904012	0.673309
EEF2	0.895373	0.335163
PMPCB	0.893114	1.69149
HSP90AB1	0.864643	0.654138
SSRP1	0.853602	0
EPPK1	0.847922	0
VARS	0.834012	0
ZC3HAV1	0.786277	0
H2BFS	0.772141	0.379192
RNH1	0.769593	0.398846
PPP1R10	0.755299	0.379585
AP1S2	0.750358	0.948294
PSMB6	0.746551	0
TCPA	0.739877	0.265598
SERF2	0.739133	0.598176
HSP90AA1	0.726203	0.296221
ACAA2	0.700139	0
RAB11A	0.68933	0
ATP5A1	0.678095	0.316451
PSMC2	0.649239	0
CPSF6	0.60375	0.648459
NIPBL	0.603308	0.523206
HMGCS1	0.600317	0
WDR5	0.595767	0
LAMP1	0.587693	0.600371
PSMD2	0.58731	0
PCBP1	0.58679	0.280809
NME1-	0.585917	0.528531
ICA1L	0.57446	0
G3BP2	0.562193	0
STOML2	0.561916	0
EIF2AK2	0.545609	0
EFTUD2	0.527902	0
PSMA7	0.525679	0
RNPEP	0.522524	0.420266
CFL1	0.518068	0.406484
ATP5B	0.517523	0.365692
GLA	0.511433	0
HNRNPD	0.50241	0
ANKHD1	0.492206	0.391747
SOS1	0.49151	0
GAPDH	0.488229	0.30094
RBBP7	0.481175	0
PTGES3	0.477009	0.386262
COPG1	0.475528	0
CCT6A	0.473176	0.230996
SSR4	0.470321	0
IMPDH2	0.459726	0
ATP5L	0.454321	0
CALR	0.444038	0
AKR1B1	0.441392	0.281082
HSP90AB2P	0.418217	0
RAB27A	0.416968	0.331529
KPNA2	0.414914	0.327252
ATIC	0.412978	0
TRAP1	0.407497	0.265804
RBBP4	0.406517	0.330419
MAT2A	0.405063	0
MT-CO2	0.401999	0
DYNC1I2	0.388678	0.360628
MCM2	0.386108	0
PGK1	0.385843	0
TUBB4B	0.385267	0.181013
FARSA	0.379924	0
DSTN	0.371289	0
LMAN2	0.36859	0
SNRPF	0.361285	0.346458
FLOT1	0.359817	0
PRMT1	0.353668	0.14296
SCAMP2	0.350717	0
PSMD14	0.342339	0
SDHA	0.34207	0
FSCN1	0.338914	0.0807362
CAPZA1	0.331781	0
CYB5R3	0.331699	0.141515
IGF2BP1	0.328635	0.188832
TMPO	0.325476	0.240701
2009-09-01	0.316147	0
PRPF40A	0.315861	0.310813
XRCC5	0.314584	0.107706
BLVRA	0.308681	0
HMGN2	0.307201	0.266344
RAB5C	0.306599	0.135397
DEK	0.304304	0.279776
TARS	0.299962	0.165054
ACLY	0.294309	0.0763695
RPL32	0.293688	0
ACTC1	0.293685	0.214525
VDAC2	0.293549	0.1253
RPSA	0.290369	0
EIF4B	0.286551	0.260401
RAB5B	0.284253	0
SND1	0.2823	0
RPS2	0.278731	0.0783061
TALDO1	0.278276	0
RSL1D1	0.278172	0
RRM1	0.275674	0
SRP14	0.275567	0
STEAP1	0.274028	0.253314
IARS	0.273011	0
MSN	0.26858	0.111278
EBP	0.264958	0
NARS	0.257707	0
VIM	0.255395	0.14914
EIF3I	0.252732	0.126232
HADHA	0.247609	0
DPYSL2	0.246477	0
EIF3G	0.241927	0
U2AF1L5	0.234234	0.248228
SREK1IP1	0.223251	0.186031
EIF6	0.213513	0.133797
ALDOC	0.210233	0
PSMA3	0.207522	0
RCC2	0.207318	0.0703722
A	0.206431	0
PHPT1	0.206415	0
SGPL1	0.201472	0
CIR1	0.199806	0.113186
SERBP1	0.198393	0.186932
SNRPD2	0.195224	0.0692725
CLPX	0.193441	0.205803
FKBP4	0.191578	0
COLGALT1	0.189018	0
ACTG1	0.186044	0.185609
MARS	0.185337	0
MAGOH	0.183834	0
HNRNPA2B1	0.180527	0.239264
PRDX1	0.175336	0.127638
CCNT2	0.173319	0.118381
DDOST	0.169496	0.0931541
CTSD	0.168195	0.105288
CBR1	0.165022	0
RPS11	0.157089	0.0360467
PRPF19	0.153699	0
PSMB3	0.14974	0.131859
RNPS1	0.147966	0.0965269
RPL27A	0.143004	0
SOD1	0.142417	0.0887693
MTAP	0.138604	0
RPS28	0.138296	0.082861
VCP	0.137157	0
TRA2A	0.133249	0
TBC1D10B	0.132203	0.0846381
RPL13	0.12955	0
ENO1	0.127105	0.0525126
MCM6	0.126251	0
HMGN4	0.124332	0.099542
RPL3	0.121519	0
MDH1	0.108538	0
HSPA8	0.107382	0.127211
HNRNPA3	0.105596	0.0628456
TBCB	0.0969675	0
USP5	0.0909497	0
GLUD1	0.0884504	0.0486629
ATP2A2	0.0869617	0
GGCT	0.086314	0
KRT18	0.0833433	0.0331763
SEC13	0.0823521	0
PRDX6	0.0810463	0.0220722
PEPD	0.0805677	0.0753751
DDX39B	0.0738305	0.0234443
SNRNP27	0.0623921	0.0447415
GNB1	0.0588735	0
PGAM4	0.0574532	0.0352042
HNRNPU	0.056611	0.0211384
DDX3X	0.0553345	0.0179212
UQCRFS1P1	0.0537968	0
SUCLG1	0.0517354	0
DDX1	0.050328	0
HBS1L	0.0501457	0
PSMB5	0.0492301	0.0165957
SUPT5H	0.0473395	0
MPDU1	0.0432835	0
NUP93	0.0417163	0
WDR1	0.036484	0.0241846
RPS21	0.0360995	0.0247736
RDX	0.0326185	0.0344151
VDAC1	0.0325857	0.00980211
LMAN1	0.0273648	0
FAU	0.0256554	0.0186088
NOP2	0.0251315	0.0201413
PC	0.0235148	0.0134172
SRSF11	0.0231322	0.020785
DDX6	0.0224558	0
HSP	0.0224231	0.0176379
DDX42	0.022134	0.00991384
EIF2S1	0.0213898	0.010551
PSMB1	0.0203929	0.0167974
DDX17	0.0180827	0.0158058
H3BRB0	0.0171541	0.0110634
PPIB	0.0143526	0.0114623
SART1	0.0132582	0.00813297
ACO2	0.0122776	0
RPS25	0.0109202	0.00587158
SLC1A5	0.00956563	0
CSDE1	0.00574752	0
EXOSC4	0.00574112	0
MCCC1	0.00174144	0.00140851
HSPA9	-2.44268e-05	1.81088e-05
TP53	-0.00095724	0
U2AF2	-0.00283425	0.00216137
MC	-0.00842639	0
LTV1	-0.0101232	0.00685687
HSPA7	-0.0157279	0.00879151
SUPT16H	-0.0182383	0
UGP2	-0.0191128	0
IGF2BP3	-0.020421	0
ARHGDIA	-0.024552	0.0122605
LUC7L	-0.0248206	0.0162871
ETF1	-0.0248903	0
PPIG	-0.0279551	0
PAICS	-0.0306649	0.0138742
C7orf55-LUC7L2	-0.0325797	0.027588
DCD	-0.0345094	0.0192342
DNAJA1	-0.0349976	0
NONO	-0.0391739	0.0120087
RPL31	-0.0410541	0.0370262
CSRP1	-0.043819	0.0555073
PA2G4	-0.0447077	0.0180729
ARPC4-TTLL3	-0.0508976	0
U2SURP	-0.0545977	0.0396345
ADSS	-0.0547916	0
SRSF2	-0.0549005	0.0291473
PRDX4	-0.0565476	0.0432691
CARHSP1	-0.0588044	0.0330588
RBMX2	-0.0614644	0.0607249
ETFA	-0.0615587	0
ARCN1	-0.0620618	0.0244823
THOC2	-0.064199	0.0411766
2007-09-01	-0.0672799	0.0302628
HNRNPM	-0.0687232	0
RUVBL1	-0.0706768	0
TUBA4A	-0.0774063	0.0402655
GLO1	-0.0781854	0.0318087
TOMM40	-0.0787372	0.0255377
NOLC1	-0.0813262	0.0540042
EIF4A1	-0.0824047	0.0301368
HIST3H2BB	-0.082422	0.0457276
HLA-A	-0.0830646	0
RBM39	-0.0835213	0.0858214
MMP10	-0.0883351	0
GNB2	-0.0886177	0
PAFAH1B1	-0.0911522	0
DDX5	-0.100213	0
GSTP1	-0.102138	0
EIF3H	-0.107119	0.0457875
EIF3D	-0.10722	0.0575222
SFPQ	-0.107692	0.148585
2011-09-01	-0.115276	0
ACOT7	-0.116478	0.0617519
STRAP	-0.117051	0.0367689
PPIL1	-0.117212	0
PSMA6	-0.117744	0.0677822
PGD	-0.119628	0
SRSF7	-0.119841	0.0709334
TUBA1C	-0.121512	0
HCFC1	-0.122867	0
ARL6IP4	-0.12657	0.0880478
PCNA	-0.131261	0.0620928
ALDH9A1	-0.131996	0.0863146
TES	-0.13437	0
PRPF38A	-0.134784	0.123582
PCCA	-0.135246	0.0844466
PSMA4	-0.137009	0
SLI	-0.138969	0.0581002
HNRNPA0	-0.147274	0.059962
TCOF1	-0.14775	0
2002-09-01	-0.148977	0.12345
DYNLL1	-0.14966	0
SFXN1	-0.158642	0
KATNAL2	-0.161324	0
ATP5C1	-0.166037	0
HSD17B4	-0.167931	0
RPL17	-0.168143	0
EIF3B	-0.169523	0
EIF5A	-0.17218	0
RPL23A	-0.174639	0.150732
YWHAE	-0.174875	0.142703
FUS	-0.175649	0.0952955
CCT4	-0.18971	0.0611702
RAB21	-0.19788	0
SLC16A1	-0.200119	0
CAPZB	-0.202218	0.0722021
CBX3	-0.20272	0
FHL1	-0.203048	0
SRSF3	-0.204223	0.170276
UBE2D3	-0.206836	0
LUC7L3	-0.207517	0.123375
PDIA4	-0.208361	0.1527
EZR	-0.208517	0.128273
ST3GAL3	-0.213931	0.174549
CBX5	-0.215409	0.157777
GOT2	-0.219474	0
TOP1	-0.222912	0.207814
PRPS1	-0.236332	0
PKM	-0.238105	0.0899598
PFN1	-0.24319	0.134211
RPN1	-0.245921	0.0918276
NACA	-0.247653	0.106884
SNRPD3	-0.251096	0.190011
PLEC	-0.251891	0.302108
RL26	-0.257754	0.119713
TRIP12	-0.258617	0.296021
PDIA3	-0.26286	0.273793
BRD3	-0.274114	0.179418
EIF2S3L	-0.2751	0.102166
CLIC1	-0.27529	0
SPCS2	-0.279267	0.198195
HIST3H3	-0.279821	0.260087
EIF3L	-0.281343	0
YWHAZ	-0.281779	0.206605
ZNF207	-0.285411	0
DDX46	-0.287602	0.061717
CCT5	-0.28881	0.246713
TRA2B	-0.295833	0.0945917
CWC22	-0.297872	0.127285
RPL28	-0.302322	0
RPS9	-0.302509	0.368465
GPI	-0.307521	0
HSD17B10	-0.315097	0.112513
ACIN1	-0.317208	0.222015
DDX21	-0.320891	0.316267
ESYT1	-0.321945	0
PTBP1	-0.322868	0.128876
MDK	-0.325392	0.235425
RACK1	-0.327376	0.119026
RABL6	-0.32973	0.228262
CRIPT	-0.332056	0
EIF2A	-0.334481	0.375402
MDH2	-0.341263	0.10013
RUVBL2	-0.342199	0
BRIX1	-0.342323	0
CCNT1	-0.343471	0
PLD3	-0.343658	0.276995
RPS14	-0.345314	0.11523
EMG1	-0.34606	0
HSP90B1	-0.348433	0.207788
TAGLN2	-0.35025	0.291221
MIF	-0.352454	0.211162
TXNDC5	-0.353751	0.696701
MCM4	-0.356596	0
AHSA1	-0.359777	0
UBA1	-0.36018	0
ARF5	-0.364423	0.305387
RPL9	-0.365016	0.21296
PTN	-0.372843	0.230682
RPL	-0.379079	0
FASN	-0.37937	0.115879
PPIA	-0.382072	0.305977
DDX23	-0.382112	0.307975
RPL13	-0.383761	0
RSRC2	-0.383868	0.398312
RPS7	-0.387931	0.16389
RPL10	-0.39314	0.232827
RP9	-0.393944	0.259179
NAA10	-0.393966	0.286638
RPS16	-0.395112	0
CNP	-0.396323	0
PARK7	-0.402352	0
RPL27	-0.404785	0.306498
RPL22	-0.405026	0.326987
SUMO2	-0.407127	0.299951
EIF4A3	-0.408254	0.229212
RPS8	-0.413116	0.127193
FKBP12-Exin	-0.4154	0.287146
ERVFC1	-0.419195	0.367748
RPLP0	-0.423298	0.395563
SREK1	-0.425918	0.438915
NUP43	-0.429971	0
RPL18	-0.435985	0.234927
RPL1	-0.437203	0.171337
GART	-0.4373	0
HNRNPA1	-0.438063	0.274834
CAD	-0.439446	0
CORO1C	-0.443497	0
DRG1	-0.443922	0
ARGLU1	-0.445552	0.372799
TPI1	-0.450182	0.504145
H1FX	-0.453608	0.467108
HIST1H1C	-0.456664	0.358246
ABCB9	-0.462211	0.5008
HN1L	-0.465849	0.423389
DAD1	-0.470342	0
TMA7	-0.473501	0.355301
CNTLN	-0.477491	0.361118
GRN	-0.478578	0.560643
SLC25A5	-0.487995	0
HNRNPL	-0.493388	0.194223
CAP1	-0.495327	0.216583
TUBB	-0.501639	0.232763
TXNL1	-0.512639	0
DKC1	-0.514998	0.738111
CASP3	-0.516445	0
SF3B3	-0.517233	0.25852
PABPC1	-0.518695	0.527675
RPL4	-0.522166	1.00997
SPTBN1	-0.523355	0
RPS4X	-0.534599	0.277473
PHB2	-0.534662	0.274311
NOP56	-0.537736	0.489789
TARDBP	-0.541724	0.266736
PRDX3	-0.542336	0.397537
RPL11	-0.545828	0
CKB	-0.547524	0.455056
CCDC124	-0.553687	0.523341
HNRNPH1	-0.558007	0.434402
RAB1B	-0.559388	0
USP14	-0.563536	0
RPL7A	-0.572079	0.30044
ADRM1	-0.575558	0.485385
RCC1	-0.578735	0
SEC61B	-0.582703	0.569515
AIFM1	-0.583219	0.314755
GOT1	-0.58586	0
PCBP2	-0.593947	0.372163
HNRNPUL1	-0.605657	0.428675
GDI2	-0.609485	0.21228
RPL24	-0.617898	0.540047
LUZP1	-0.618349	0.401216
ALDO	-0.625982	0.250568
SRSF10	-0.626307	0.760618
HIST1H2BO	-0.629602	0
NSUN2	-0.629892	0
CDC42	-0.631117	0.254902
RPL14	-0.631732	0.533942
NSRP1	-0.635821	0
EPRS	-0.635933	0
SRM	-0.636706	0
BUB3	-0.644396	0
H2AFJ	-0.648824	0.441502
UBB	-0.649016	0.838157
HIST1H2AB	-0.653114	0
NPM1	-0.653959	0.488848
PRMT5	-0.65476	0
CHERP	-0.655885	0.467703
FIP1L1	-0.657941	1.03338
DHX15	-0.663451	0.843951
MMTAG2	-0.670013	0.71779
SRSF12	-0.670075	0
HIST2H3PS2	-0.674284	0.782031
RPL11	-0.680416	0.314178
RTCB	-0.68241	0.696301
RAB1	-0.685731	0.287206
EEF1A1P5	-0.689698	0.407157
TUFM	-0.690818	0.193238
RAP1B	-0.692315	0.561866
RPS3A	-0.701701	0.501261
PPIL4	-0.702952	0.82266
CDK12	-0.703261	0.584195
HIST2H2BF	-0.707364	0.769634
FLNA	-0.708872	0.445481
ATP1A1	-0.710361	0.673902
ALDH18A1	-0.714185	0.659665
RAN	-0.736661	0.254651
LBR	-0.737021	0
PRDX2	-0.738855	0.339863
HNRNPAB	-0.742176	0
RPA1	-0.742735	0.796578
UCHL1	-0.744595	0
HSPD1	-0.745323	0.699245
HNRNPK	-0.7541	0.371932
NCL	-0.757958	0.832102
SRRM1	-0.758115	0.389218
CLTC	-0.759953	0.261901
PSMG1	-0.768826	0
GANAB	-0.769947	0.272624
NUCKS1	-0.77852	0.535102
SRSF1	-0.784507	0.590883
KHDRBS1	-0.787601	0.691878
SMU1	-0.788006	0
HMGA2	-0.788665	0.633232
SLC25A11	-0.798695	0
ATP5J2	-0.81726	0
DARS	-0.821485	0.633198
RPL7	-0.839229	0.890265
RPS3	-0.856993	0.308901
NKAPL	-0.885326	1.50334
APEX1	-0.885616	0
RPS27L	-0.894633	0
TXN	-0.899687	0.709037
SNRPB	-0.900507	0.411403
RPL29	-0.908944	1.12988
MTDH	-0.912721	0
AKAP17A	-0.921376	0.642576
TMED10	-0.924023	0
RPS6	-0.929822	0.280194
HIST1H1D	-0.931092	1.44409
RPL36A-HNRNPH2	-0.945431	0.783306
TKT	-0.95268	0.43254
PSMD3	-0.95546	0
CACYBP	-0.961737	0.432386
EEF1G	-0.962026	0.367185
RBM15	-0.965638	0
RPL23	-0.973592	0.352502
RAB10	-0.979746	0.787139
ABCF1	-0.982456	1.89594
RAB6A	-0.985327	0.471049
SERPINH1	-0.988901	0
RPS26P11	-0.994835	1.53489
EIF5B	-1.00555	0.732373
RPL10A	-1.01092	0
TOP	-1.01464	1.09209
YTHDF2	-1.01956	0.807081
LDHB	-1.02101	0.465068
RPL8	-1.02308	0.595303
RPL15	-1.02622	0.552381
PSMA2	-1.03054	0.627504
CCT8	-1.05054	0.564154
RPL12	-1.05745	0.465756
XRCC6	-1.06097	0.494318
RPL21	-1.07386	0.594664
HNRNPC	-1.08078	0.580549
RPL3	-1.08524	0.353005
RSRC1	-1.08908	1.07647
PRPF38B	-1.1083	1.5024
RECQL	-1.10987	0
RPS15A	-1.12565	0.390108
HIST1H4A	-1.15869	0.839612
SRRM2	-1.16264	0
RBMX	-1.16287	1.6968
LDHA	-1.16436	0.437904
SLC25A4	-1.17174	0.567352
BOLA2	-1.17803	1.12918
EDF1	-1.1866	0.973997
ILF3	-1.19601	1.15268
GNAI3	-1.19917	0
HMGA1	-1.20172	1.12844
RAC1	-1.20187	0.574494
SRSF6	-1.22001	2.13577
MYH9	-1.22561	0.788664
BCAP31	-1.22598	0
RPS23	-1.27992	0.51483
SLC25A3	-1.28079	1.0249
HMGB2	-1.31912	0
HMGB1	-1.32107	0
ELAVL1	-1.32174	1.01687
ABL1	-1.32976	0
RAB14	-1.33497	0
MESDC2	-1.35118	0
ANXA2	-1.35343	0
SON	-1.37713	0.523165
SUB1	-1.40319	0
RAB7A	-1.41003	0.742446
RPS24	-1.45385	0
RPS20	-1.54052	0.958526
RHOC	-1.58086	0
H2AFY	-1.63167	0
DIDO1	-1.63339	0
PNN	-1.64298	0
RPL34	-1.66315	0.773481
NOP58	-1.66928	1.71398
RPL6	-1.68705	0.875192
AIFM2	-1.73508	0
SRRM2	-1.80733	0.826695
SRC	-1.87893	0.156865
PARP1	-1.96777	0.975256
RPL5	-2.06676	0.779635
SNRNP70	-2.10862	2.76814
PSMF1	-2.18059	0
PSMC1	-2.18657	0
GNAI2	-2.64401	0.300235
BASP1	-3.20892	0.202557
GNAO1	-3.25317	0.3738
ARF3	-3.91769	0.900815
U2AF2	NaN	0
GNAO1	NaN	0
THOC2	NaN	0
PSMC1	NaN	0
TCEB3	NaN	0
SPCS1	NaN	0
CLIC4	NaN	0
PSAT1	NaN	0
SRPRB	NaN	0
HDGFRP3	NaN	0
HIGD1A	NaN	0
PIN4	NaN	0
MCTS1	NaN	0
RALY	NaN	0
NUDT5	NaN	0
HMGXB4	NaN	0
NIPSNAP3A	NaN	0
UBA2	NaN	0
VPS29	NaN	0
nef	NaN	0
LARS	NaN	0
HACD3	NaN	0
MAT2B	NaN	0
MTCH1	NaN	0
C9orf78	NaN	0
TECR	NaN	0
FAM49B	NaN	0
SMC4	NaN	0
OSTC	NaN	0
AASDHPPT	NaN	0
TIGAR	NaN	0
SARS2	NaN	0
VTA1	NaN	0
C12orf10	NaN	0
NRDE2	NaN	0
RPF2	NaN	0
ILKAP	NaN	0
WDR33	NaN	0
GTPBP4	NaN	0
MRPL13	NaN	0
AP1M1	NaN	0
HINT2	NaN	0
PSMG3	NaN	0
LLPH	NaN	0
SRSF8	NaN	0
CPPED1	NaN	0
WDR77	NaN	0
ELAC2	NaN	0
EBNA1BP2	NaN	0
CHP1	NaN	0
RBM14	NaN	0
PGAM5	NaN	0
SNRNP40	NaN	0
ARL8A	NaN	0
MYDGF	NaN	0
KHSRP	NaN	0
UFD1L	NaN	0
RAD50	NaN	0
ARPC1A	NaN	0
PHF3	NaN	0
AP3S1	NaN	0
HM13	NaN	0
PNPT1	NaN	0
BOD1L1	NaN	0
TDRD9	NaN	0
MAPK1IP1L	NaN	0
CDKN2A	NaN	0
ARL17B	NaN	0
TMED7	NaN	0
THOC6	NaN	0
ZC3H18	NaN	0
ALYREF	NaN	0
CENPV	NaN	0
YTHDF3	NaN	0
NUFIP2	NaN	0
PRPF8	NaN	0
ZC3H13	NaN	0
TIMM50	NaN	0
TUBB8	NaN	0
IMMT	NaN	0
HIST2H2AA3	NaN	0
SYPL1	NaN	0
NEDD8	NaN	0
NSDHL	NaN	0
HMGN3	NaN	0
TRIP13	NaN	0
SAFB	NaN	0
RAB	NaN	0
PWP2	NaN	0
PPA1	NaN	0
PAFAH1B3	NaN	0
PDIA6	NaN	0
RAB39A	NaN	0
LAGE3	NaN	0
TRIM25	NaN	0
FLOT2	NaN	0
DYNC1H1	NaN	0
MLEC	NaN	0
EIF3A	NaN	0
COX17	NaN	0
IDI1	NaN	0
TUBB2A	NaN	0
KRR1	NaN	0
HDAC1	NaN	0
PRPF4B	NaN	0
PABPC4	NaN	0
TRIM28	NaN	0
CHAF1B	NaN	0
ACACA	NaN	0
ECH1	NaN	0
PPP1R8	NaN	0
AIM	NaN	0
TWF1	NaN	0
LG3BP	NaN	0
CKAP4	NaN	0
GFPT1	NaN	0
EEF1A2	NaN	0
CSTF1	NaN	0
PLP2	NaN	0
YWHAH	NaN	0
RHOG	NaN	0
PRKDC	NaN	0
CCT	NaN	0
PAFAH1B2	NaN	0
RPL38	NaN	0
SNRPD1	NaN	0
SNRPE	NaN	0
RPS13	NaN	0
PSMC5	NaN	0
NCS1	NaN	0
PPP1CA	NaN	0
RRAS2	NaN	0
B2M	NaN	0
HSPE1	NaN	0
RPL37A	NaN	0
ABCE1	NaN	0
RAB	NaN	0
RAB8A	NaN	0
CD81	NaN	0
ELOF1	NaN	0
NPEPPS	NaN	0
MANF	NaN	0
DRG2	NaN	0
PSMD4	NaN	0
COPA	NaN	0
POLR2H	NaN	0
VAMP7	NaN	0
PSMD7	NaN	0
RBM25	NaN	0
PPM1F	NaN	0
PREP	NaN	0
QARS	NaN	0
CAPZA2	NaN	0
RPS5	NaN	0
PPP1CC	NaN	0
COPB2	NaN	0
SERPINB6	NaN	0
PHB	NaN	0
PFN2	NaN	0
SHMT2	NaN	0
UQCRC1	NaN	0
NMT1	NaN	0
NKTR	NaN	0
C21orf33	NaN	0
PSMB4	NaN	0
CANX	NaN	0
RPS12	NaN	0
MCM3	NaN	0
ACAT1	NaN	0
ATP5F1	NaN	0
WARS	NaN	0
FBL	NaN	0
OSBP	NaN	0
M6PR	NaN	0
HK1	NaN	0
CTPS1	NaN	0
HMGA1	NaN	0
RPA2	NaN	0
GSPT1	NaN	0
AKR1A1	NaN	0
gag	NaN	0
PRPS2	NaN	0
RALB	NaN	0
PDHB	NaN	0
HSPA5	NaN	0
ESD	NaN	0
LTA4H	NaN	0
SNRPA1	NaN	0
PDHA1	NaN	0
P4HB	NaN	0
PTMA	NaN	0
RPN2	NaN	0
HPRT1	NaN	0
PNP	NaN	0
CLPTM1	NaN	0
BPNT1	NaN	0
ACSL3	NaN	0
ENDOD1	NaN	0
ARL6IP5	NaN	0
RP2	NaN	0
PSIP1	NaN	0
CPNE3	NaN	0
NOL3	NaN	0
CUTA	NaN	0
BRD4	NaN	0
SMCA5	NaN	0
PRPSAP2	NaN	0
PLRG1	NaN	0
TIMM44	NaN	0
HNRNPR	NaN	0
PRPF4	NaN	0
PPM1G	NaN	0
SURF4	NaN	0
MRPS12	NaN	0
ARPC2	NaN	0
PFAS	NaN	0
HAT1	NaN	0
IRS4	NaN	0
AP3D	NaN	0
PDXK	NaN	0
PPP6C	NaN	0
RTCA	NaN	0
DDX39A	NaN	0
NUDT19	NaN	0
SMCHD1	NaN	0
ILVBL	NaN	0

## Sheet: PSMC1
Gene name	Relative enrichment (PSMC1)	Significance, -log p	Significant at FDR=0.05
PSMC1	21.2204	31.2537	+
PSMC5	14.9974	7.67313	+
PTN	2.21979	0
PSAT1	1.97135	0
PPP1R10	1.50309	1.00178
LARS	1.48328	0
CRKL	1.46743	0
MED1	1.33198	1.13517
PRPF4B	1.32469	1.32991
COX17	1.3192	0
DCD	1.31102	1.4603
PEPD	1.08004	0
SUB1	1.04588	0
AKAP17A	1.0354	0
MMP10	1.00947	1.25614
CCT3	0.993032	0
SON	0.977352	0
C9orf78	0.954687	0
SLI	0.936722	0.422426
CARHSP1	0.867922	0
HMGN1	0.861673	0.473183
RPS21	0.84014	0
BRD4	0.815679	0
SNRNP200	0.793519	0.576474
C19orf53	0.738677	0.509885
HMGN2	0.733685	0.848423
AP3D	0.69041	0
AP1S2	0.651073	0.587592
MCM4	0.587394	0
PRDX3	0.568973	0.423102
PSMC2	0.560274	0.633595
U2AF2	0.531628	0.619135
SERF2	0.521755	0.37635
STEAP1	0.518198	0.575194
DIDO1	0.516734	0
PRPF40A	0.507243	0.577124
TXN	0.484255	0.311457
RBMX2	0.484096	0.551767
EIF5A	0.473997	0.544089
TCOF1	0.45668	0.298085
YWHAZ	0.434277	0.351434
DDX21	0.422059	0.449558
CLPX	0.416272	0.541118
DEK	0.393667	0.386769
KHSRP	0.39278	0
CIR1	0.384011	0.24056
LUC7L	0.372582	0
RSRC2	0.36975	0.379528
RNPS1	0.365633	0.273932
LUC7L3	0.355464	0.229818
RPL14	0.351367	0
PRPF38A	0.350478	0.386426
DKC1	0.348347	0.432287
H1FX	0.347202	0.330742
GLO1	0.342816	0
PCCA	0.341436	0.242253
H2BFS	0.330373	0.11044
SREK1IP1	0.326607	0.293773
EIF4B	0.320316	0.298961
U2SURP	0.320247	0.284139
PSMB3	0.304119	0.242295
C7orf55-LUC7L2	0.299389	0.32147
RPL17	0.295376	0
CBX5	0.275014	0.209721
PPIL4	0.274418	0.238481
TOP1	0.271621	0.263472
SPTBN1	0.270631	0
BRD3	0.270032	0.176315
SOS1	0.257433	0
TRIP12	0.252734	0.287699
ANKHD1	0.249022	0.17084
HMGA2	0.24101	0.144539
PLD3	0.231533	0
PSIP1	0.230176	0.152965
CCT	0.228413	0
HMGN4	0.22818	0.198238
NKAPL	0.227618	0.231205
NOP58	0.207616	0.136525
SNRNP27	0.19897	0.158203
RPL29	0.194678	0.151291
EIF2A	0.194457	0.193299
ZC3H13	0.187924	0
FUS	0.186257	0.101638
SRSF7	0.184017	0
ARL6IP4	0.183205	0.1326
MCCC1	0.178543	0.169328
FKBP4	0.164184	0
THOC2	0.158547	0.108481
TMA7	0.155164	0.0962465
CCNT2	0.153181	0
PSMB1	0.146564	0.13531
CPSF6	0.144245	0.111774
NOP56	0.142008	0.0995258
ANXA2	0.138658	0
EIF5B	0.136699	0.0664549
CWC22	0.135884	0.0542602
HIST1H1C	0.132116	0.0846029
DDX17	0.131233	0.10313
EDF1	0.128801	0.0791777
SRSF11	0.121578	0.12034
TRIM28	0.121566	0
TPI1	0.120639	0.0838034
ERVFC1	0.119514	0.0851321
PC	0.117664	0.07128
PLEC	0.103217	0.106798
RPL13	0.101181	0
PSMD3	0.0969099	0.0623048
NOLC1	0.0954369	0.0640072
ICA1L	0.0914586	0
RBM39	0.087246	0.0899983
SEC61B	0.0836637	0.0473964
TALDO1	0.0799807	0
HNRNPA2B1	0.0745466	0.087371
HSP90B1	0.0689586	0.0289521
ABCF1	0.066376	0.0605844
SAFB	0.063291	0.0365349
RPS28	0.0623077	0.0356198
RNH1	0.056788	0
CNTLN	0.0559117	0.032666
RBMX	0.0553893	0.0388456
PTGES3	0.0440878	0
ACIN1	0.0376347	0.02208
HN1L	0.0358247	0.0240889
PDIA3	0.0339563	0
TAGLN2	0.0337739	0.0273149
RAB27A	0.0333022	0.0205866
PABPC1	0.0311492	0
HIST1H1D	0.0242349	0.0189588
FAU	0.0240058	0.0173889
TBCB	0.0239131	0
ARGLU1	0.00732656	0.00456833
CDK12	0.00559457	0.0030951
DDX23	-0.00379114	0.00236353
RPS25	-0.00452499	0.00242346
SART1	-0.00940899	0.00575626
SRSF10	-0.0129497	0.00978067
RPS3A	-0.0146059	0.00726417
NUCKS1	-0.0192884	0.00910206
RPL32	-0.0271837	0.0198967
NOP2	-0.0331419	0.0267519
TBC1D10B	-0.0332736	0.0199538
RPL4	-0.0360754	0.040967
GPI	-0.0391658	0
HMGB1	-0.0435937	0.0148057
H3BRB0	-0.0461685	0.0304108
RPL23A	-0.0477624	0.0371126
ALDH18A1	-0.053982	0.0271654
DDX42	-0.054564	0.0248439
RDX	-0.0549618	0.072992
PDIA4	-0.0642607	0
H2AFJ	-0.0782058	0.0396305
SRSF2	-0.0821588	0.0443176
SRRM2	-0.0847491	0.0394055
HNRNPA3	-0.0912601	0.0538284
TXNDC5	-0.0972046	0.138235
NCL	-0.098668	0.0697359
ILF3	-0.105423	0.0579315
NIPBL	-0.107981	0.0686951
TMPO	-0.108843	0.0696917
SRSF6	-0.111111	0.0726987
HMGCS1	-0.112763	0
DDOST	-0.115089	0
SFPQ	-0.11792	0.164868
ZNF207	-0.128829	0.0984241
IMPDH2	-0.131218	0
HMGB2	-0.131697	0
YWHAE	-0.132814	0.085134
UGP2	-0.137701	0
GRN	-0.147795	0
MMTAG2	-0.149053	0.111642
RPL24	-0.155264	0.102016
CCT6A	-0.156051	0.0541442
PRDX4	-0.161559	0.134628
PARK7	-0.170372	0
HIST2H2BF	-0.172044	0.130484
SUMO2	-0.175924	0.139882
SRSF3	-0.180444	0.147726
HIST1H2BO	-0.180839	0.0779222
MDK	-0.182035	0.120305
MT-CO2	-0.205899	0
RPL7A	-0.20952	0.0939195
GNB2	-0.210792	0
TKT	-0.21221	0.060699
VARS	-0.213897	0
CCT5	-0.239196	0.15771
SERBP1	-0.242276	0
CCNT1	-0.24722	0
HSPD1	-0.249973	0.218557
HSPA7	-0.255726	0.206804
CCT8	-0.257761	0
EIF3B	-0.275935	0
KPNA2	-0.277603	0
RPL7	-0.281045	0.168726
LUZP1	-0.283161	0.155618
HSPA9	-0.291038	0.216691
TMEM263	-0.294846	0.177851
VCP	-0.299116	0.0855073
EIF3L	-0.304115	0
PRDX1	-0.313593	0.251087
NME1-	-0.319683	0.244139
HIST3H3	-0.322733	0.310061
CHERP	-0.323058	0.193942
TOP	-0.32314	0.234442
RPS4X	-0.325011	0.123696
HSP90AA1	-0.336405	0.0970538
TUBB8	-0.342727	0
PRDX2	-0.354652	0.176804
RPL22	-0.356931	0.221125
PNP	-0.360177	0
UBB	-0.380314	0.402141
RTCB	-0.381198	0.320512
WDR1	-0.383282	0
SRSF12	-0.383366	0.420519
ST3GAL3	-0.38472	0.355356
ACACA	-0.385361	0
SNRPD3	-0.38556	0.251969
HSPA8	-0.387943	0.620768
ACTC1	-0.390245	0.302961
MTDH	-0.393753	0.204437
ACLY	-0.394788	0.105219
RRM1	-0.397992	0
HSP	-0.403876	0.435292
SNRPD1	-0.406841	0
RSL1D1	-0.414045	0.315444
SREK1	-0.424548	0.437063
HDGFRP3	-0.426764	0.46071
RSRC1	-0.431837	0.3029
CAP1	-0.433489	0
ARHGDIA	-0.435524	0
HIST3H2BB	-0.439791	0.381093
SNRNP70	-0.444734	0.279476
PLP2	-0.451228	0
EEF2	-0.456209	0.149698
DHX15	-0.47063	0
CCDC124	-0.484794	0.438462
SRSF1	-0.491221	0.319742
PRPF38B	-0.493252	0.460585
CAPZA1	-0.49335	0
FIP1L1	-0.496709	0.684457
RPA1	-0.505776	0
VIM	-0.506165	0.337918
ACTG1	-0.510201	0.669988
CFL1	-0.516854	0.405249
UBE2D3	-0.529594	0
HSP90AB1	-0.532292	0.343187
PCBP1	-0.53598	0.251411
HNRNPA1	-0.541529	0.358181
U2AF1L5	-0.541706	0.744533
RPL31	-0.545167	0.77138
CKB	-0.548136	0.455728
PSMB6	-0.550453	0
MCM3	-0.554605	0
CAPZB	-0.555901	0.225541
PPIB	-0.557088	0.695015
HNRNPC	-0.561777	0.250196
G3BP2	-0.563054	0
RPS9	-0.564878	0.866985
PSMA2	-0.569221	0
ADRM1	-0.572044	0.375508
AKR1B1	-0.575463	0
EBNA1BP2	-0.624036	0
RPL10A	-0.637515	0
RP9	-0.644329	0.484565
MSN	-0.644613	0.309982
RPS2	-0.647666	0.201975
PRDX6	-0.649281	0.208904
RBBP4	-0.664337	0
TES	-0.669816	0
LDHA	-0.678874	0.223211
MIF	-0.68292	0.483797
HNRNPAB	-0.684154	0
HIST2H3PS2	-0.684846	0.799849
GLUD1	-0.686237	0
RABL6	-0.686811	0.583683
EEF1A1P5	-0.696742	0.41257
CTSD	-0.707262	0
PFN1	-0.708811	0.494265
SPCS2	-0.710356	0
ARCN1	-0.722249	0.375148
RPL15	-0.725427	0
PHPT1	-0.736784	0.437242
KHDRBS1	-0.74229	0.489191
EBP	-0.747564	0
ATP5B	-0.752005	0.462486
TARS	-0.753293	0
HIST1H4A	-0.754803	0.46268
PSMD2	-0.757245	0.622731
ACOT7	-0.761326	0
SLC25A5	-0.762512	0
GAPDH	-0.768783	0.542278
HNRNPU	-0.779588	0.386608
2009-09-01	-0.785877	0
PCNA	-0.79683	0.399294
USP5	-0.802701	0
PNN	-0.81563	0
PPIA	-0.822634	0.859522
PGAM4	-0.832182	0.815918
RPL	-0.832334	0.561248
SRRM2	-0.84054	0.296528
LDHB	-0.855496	0.369416
ATP5A1	-0.859773	0.428685
ALDO	-0.867101	0.375981
RPL36A-HNRNPH2	-0.868634	0.693852
PGK1	-0.869863	0.406962
RPS16	-0.893005	0.67247
TARDBP	-0.8991	0.664747
CBX3	-0.899827	0.516143
SF3B3	-0.900978	0
IGF2BP1	-0.910702	0
RPL8	-0.919385	0.514491
RAB5C	-0.934528	0
RPN1	-0.944343	0.453281
PHF3	-0.948621	0
PKM	-0.953352	0.466571
CCT4	-0.961458	0
EIF4A1	-0.962808	0.489983
HSD17B4	-0.977788	0
PCBP2	-0.985143	0.738176
HMGA1	-0.989948	0
CRIPT	-0.996547	0
HMGN3	-0.996608	0
DNAJA1	-1.01205	0
ATP1A1	-1.01253	0.855043
TUBA4A	-1.03121	0.870661
RACK1	-1.04285	0.482474
HNRNPD	-1.04656	1.45795
PRMT1	-1.04714	0
RPS26P11	-1.04922	0
RCC2	-1.05086	0.613566
APEX1	-1.06544	0
SSRP1	-1.06887	0.706922
TUBB4B	-1.07402	0.665193
PA2G4	-1.08365	0.673588
RPL21	-1.08978	0
HNRNPH1	-1.09359	1.12822
FLNA	-1.09861	0.816474
RPL18	-1.10384	1.06106
XRCC6	-1.11232	0.526782
DDX3X	-1.11381	0.515189
RBBP7	-1.11665	0.770651
DHX9	-1.11906	0.607003
ENO1	-1.11955	0.69044
RPL9	-1.12046	0.937659
ADSS	-1.12362	0
RL26	-1.13183	1.00937
UCHL1	-1.13286	0.646711
CDC42	-1.15377	0
DLD	-1.15929	0
WDR5	-1.15936	0.873925
RAN	-1.16519	0.45466
PTBP1	-1.17116	0.634591
KATNAL2	-1.17193	0.950692
SUPT16H	-1.18771	0
TUBB	-1.19134	0.716535
RPL27	-1.20283	1.41833
HNRNPA0	-1.20408	0.742129
SRRM1	-1.20856	0
RAB10	-1.21973	1.0956
EIF6	-1.22239	1.33899
PHB2	-1.23562	0.637986
SDHA	-1.24489	1.5165
EIF4A3	-1.25376	1.03708
PSMA6	-1.26712	1.36408
ELAVL1	-1.28235	0.732616
SNRPD2	-1.29499	0.884227
MYH9	-1.29572	0.648511
AHCY	-1.30084	0.556026
NACA	-1.30302	1.14014
RPS15A	-1.30523	0.473737
BOLA2	-1.30818	0.98744
2007-09-01	-1.31512	0.778583
SERPINH1	-1.33377	0
HNRNPL	-1.33926	0.697513
HNRNPK	-1.36955	0.840752
SNRPF	-1.36991	0
RAB1	-1.3816	0.726348
DDX39B	-1.38328	0.670225
RPS11	-1.39151	0.427191
RPL13	-1.40406	1.42665
MDH1	-1.42225	0.499818
NSRP1	-1.42271	1.65513
EZR	-1.44342	0
RPL1	-1.44795	0.798543
FASN	-1.44974	0.597982
EIF3I	-1.46898	0
LBR	-1.47594	1.6091
DARS	-1.4796	1.56512
GANAB	-1.49588	0.649881
CCT7	-1.50228	1.00415
RPL23	-1.51796	0.636518
UQCRC1	-1.52501	0
SRC	-1.52572	0.123876
RPS14	-1.54253	0.739417
MAT2A	-1.56933	0
SLC25A4	-1.57866	0.866284
RPS7	-1.59309	1.03369
PSMB5	-1.60696	0.9217
EIF2S3L	-1.60865	0
NPM1	-1.61756	1.89986
TOMM40	-1.63285	0.885581
RPL28	-1.64756	0
RPL3	-1.65522	0.813683
H2AFY	-1.66428	1.72602
RPL12	-1.67186	0.883399
RAC1	-1.67258	0.6988
TUFM	-1.69679	0.603074
AIFM1	-1.70002	0
RPL11	-1.74187	1.15409
HSD17B10	-1.75024	0.987639
RPL6	-1.76529	0.936047
RPS6	-1.76759	0
SLC25A3	-1.77699	0
RPL34	-1.78444	0.857062
NONO	-1.79038	0.942494
GNB1	-1.81116	2.3517
STRAP	-1.81355	0.966403
RHOC	-1.81503	0
EEF1G	-1.84991	0.90122
EIF3H	-1.85516	0
PAICS	-1.86274	0
MDH2	-1.87913	0.832457
CLIC1	-1.88451	0
CLTC	-1.8937	0.887852
RAB7A	-1.93112	0
KRT18	-1.98984	1.19193
RPS8	-2.02124	1.29627
PARP1	-2.09206	1.07034
RPS27L	-2.1064	0
RPS20	-2.21776	0
RPS23	-2.24543	1.15832
XRCC5	-2.25099	1.91051
GDI2	-2.30802	1.2991
DDX46	-2.35243	0.772116
RPS24	-2.42634	1.89597
ABL1	-2.4294	0
TRA2B	-2.60245	2.2141
FSCN1	-2.65569	1.42479
RPS3	-2.66349	1.53954
VDAC1	-2.76911	1.84875
TCPA	-3.03406	1.9935
RPL5	-3.07752	1.4399
ARF3	-3.70039	0.827997
GNAI2	-4.55656	0
GNAO1	-5.02745	0.670707
BASP1	-5.14777	0
FAM49B	-5.31043	0
U2AF2	NaN	0
GNAO1	NaN	0
THOC2	NaN	0
PSMC1	NaN	0
TCEB3	NaN	0
SPCS1	NaN	0
CLIC4	NaN	0
COPG1	NaN	0
SRPRB	NaN	0
YTHDF2	NaN	0
HBS1L	NaN	0
PPIL1	NaN	0
DRG1	NaN	0
FARSA	NaN	0
RUVBL1	NaN	0
HIGD1A	NaN	0
PIN4	NaN	0
RUVBL2	NaN	0
PRPF19	NaN	0
CORO1C	NaN	0
MCTS1	NaN	0
RAB21	NaN	0
RALY	NaN	0
NUDT5	NaN	0
STOML2	NaN	0
HMGXB4	NaN	0
NIPSNAP3A	NaN	0
UBA2	NaN	0
VPS29	NaN	0
nef	NaN	0
HACD3	NaN	0
MAT2B	NaN	0
MTCH1	NaN	0
TECR	NaN	0
2011-09-01	NaN	0
SMC4	NaN	0
OSTC	NaN	0
AASDHPPT	NaN	0
TIGAR	NaN	0
EXOSC4	NaN	0
SARS2	NaN	0
VTA1	NaN	0
ABCB9	NaN	0
CACYBP	NaN	0
C12orf10	NaN	0
SFXN1	NaN	0
NRDE2	NaN	0
RPF2	NaN	0
RNPEP	NaN	0
RAB1B	NaN	0
ILKAP	NaN	0
WDR33	NaN	0
GTPBP4	NaN	0
MRPL13	NaN	0
AP1M1	NaN	0
HINT2	NaN	0
ACAT2	NaN	0
TUBB2B	NaN	0
HNRNPUL1	NaN	0
PSMG3	NaN	0
ESYT1	NaN	0
LLPH	NaN	0
AIFM2	NaN	0
SRSF8	NaN	0
CPPED1	NaN	0
TUBA1C	NaN	0
WDR77	NaN	0
ELAC2	NaN	0
ACO2	NaN	0
CHP1	NaN	0
RBM15	NaN	0
RBM14	NaN	0
PGAM5	NaN	0
LTV1	NaN	0
SNRNP40	NaN	0
ARL8A	NaN	0
MAGOH	NaN	0
MYDGF	NaN	0
EMG1	NaN	0
UFD1L	NaN	0
RAD50	NaN	0
ARPC1A	NaN	0
AP3S1	NaN	0
PSMF1	NaN	0
DDX1	NaN	0
BRIX1	NaN	0
HM13	NaN	0
PNPT1	NaN	0
NUP43	NaN	0
BOD1L1	NaN	0
TDRD9	NaN	0
MAPK1IP1L	NaN	0
COLGALT1	NaN	0
CDKN2A	NaN	0
NUP93	NaN	0
ARL17B	NaN	0
TMED7	NaN	0
THOC6	NaN	0
ZC3H18	NaN	0
ALYREF	NaN	0
CENPV	NaN	0
YTHDF3	NaN	0
NUFIP2	NaN	0
ZC3HAV1	NaN	0
SND1	NaN	0
PRPF8	NaN	0
HSP90AB2P	NaN	0
HSP90AB4P	NaN	0
TIMM50	NaN	0
SMU1	NaN	0
IMMT	NaN	0
HIST2H2AA3	NaN	0
SYPL1	NaN	0
DPYSL2	NaN	0
DDB1	NaN	0
NEDD8	NaN	0
SLC1A5	NaN	0
NSDHL	NaN	0
TRIP13	NaN	0
RAB	NaN	0
PWP2	NaN	0
PPA1	NaN	0
PAFAH1B3	NaN	0
PDIA6	NaN	0
EFTUD2	NaN	0
2002-09-01	NaN	0
RAB39A	NaN	0
MESDC2	NaN	0
LAGE3	NaN	0
MCM6	NaN	0
TRIM25	NaN	0
FLOT2	NaN	0
DYNC1H1	NaN	0
MLEC	NaN	0
EIF3A	NaN	0
IDI1	NaN	0
TUBB2A	NaN	0
FHL1	NaN	0
KRR1	NaN	0
TRA2A	NaN	0
HDAC1	NaN	0
PPIG	NaN	0
DYNC1I2	NaN	0
PABPC4	NaN	0
MTAP	NaN	0
CHAF1B	NaN	0
ECH1	NaN	0
PPP1R8	NaN	0
TRAP1	NaN	0
LMAN2	NaN	0
AIM	NaN	0
TWF1	NaN	0
NSUN2	NaN	0
LG3BP	NaN	0
CKAP4	NaN	0
GFPT1	NaN	0
EEF1A2	NaN	0
CSTF1	NaN	0
YWHAH	NaN	0
SLC25A11	NaN	0
RHOG	NaN	0
ARF5	NaN	0
PRKDC	NaN	0
PAFAH1B2	NaN	0
RPL38	NaN	0
DYNLL1	NaN	0
FKBP12-Exin	NaN	0
RPL11	NaN	0
ETF1	NaN	0
RAB11A	NaN	0
SNRPE	NaN	0
RPS13	NaN	0
NCS1	NaN	0
PPP1CA	NaN	0
RRAS2	NaN	0
DAD1	NaN	0
B2M	NaN	0
HSPE1	NaN	0
RPL37A	NaN	0
RAP1B	NaN	0
ABCE1	NaN	0
RAB14	NaN	0
RAB5B	NaN	0
RAB	NaN	0
RAB8A	NaN	0
DSTN	NaN	0
PRPS1	NaN	0
CD81	NaN	0
ELOF1	NaN	0
ARPC4-TTLL3	NaN	0
EPPK1	NaN	0
MARS	NaN	0
ATP5J2	NaN	0
NPEPPS	NaN	0
SEC13	NaN	0
MANF	NaN	0
DRG2	NaN	0
PSMD4	NaN	0
USP14	NaN	0
SLC16A1	NaN	0
COPA	NaN	0
SUCLG1	NaN	0
BLVRA	NaN	0
POLR2H	NaN	0
HNRNPM	NaN	0
PGD	NaN	0
VAMP7	NaN	0
PSMD7	NaN	0
HCFC1	NaN	0
BCAP31	NaN	0
SSR4	NaN	0
RBM25	NaN	0
TMED10	NaN	0
MCM2	NaN	0
PPM1F	NaN	0
LMAN1	NaN	0
ALDH9A1	NaN	0
PREP	NaN	0
UQCRFS1P1	NaN	0
QARS	NaN	0
CAPZA2	NaN	0
RPS5	NaN	0
RPL27A	NaN	0
RECQL	NaN	0
VDAC2	NaN	0
PAFAH1B1	NaN	0
ACAA2	NaN	0
CASP3	NaN	0
STAT1	NaN	0
IARS	NaN	0
GARS	NaN	0
NAA10	NaN	0
HADHA	NaN	0
SRP14	NaN	0
PPP1CC	NaN	0
ATP5C1	NaN	0
COPB2	NaN	0
SERPINB6	NaN	0
PHB	NaN	0
PFN2	NaN	0
HSPA4	NaN	0
SHMT2	NaN	0
MCM7	NaN	0
MC	NaN	0
ATIC	NaN	0
NMT1	NaN	0
NKTR	NaN	0
C21orf33	NaN	0
PSMB4	NaN	0
CANX	NaN	0
CALR	NaN	0
CAD	NaN	0
RPL10	NaN	0
DDX6	NaN	0
PSMA4	NaN	0
PSMA3	NaN	0
RPS12	NaN	0
ACAT1	NaN	0
ATP5F1	NaN	0
WARS	NaN	0
UBA1	NaN	0
GART	NaN	0
FBL	NaN	0
OSBP	NaN	0
CSRP1	NaN	0
M6PR	NaN	0
RAB6A	NaN	0
SRM	NaN	0
EIF2AK2	NaN	0
HK1	NaN	0
RCC1	NaN	0
RPL3	NaN	0
DDX5	NaN	0
CTPS1	NaN	0
GOT1	NaN	0
HMGA1	NaN	0
ATP2A2	NaN	0
CBR1	NaN	0
RPA2	NaN	0
GSPT1	NaN	0
SNRPB	NaN	0
AKR1A1	NaN	0
ETFA	NaN	0
gag	NaN	0
PRPS2	NaN	0
LAMP1	NaN	0
RALB	NaN	0
PDHB	NaN	0
HSPA5	NaN	0
ESD	NaN	0
ALDOC	NaN	0
LTA4H	NaN	0
SNRPA1	NaN	0
CNP	NaN	0
GSTP1	NaN	0
RPSA	NaN	0
GNAI3	NaN	0
PDHA1	NaN	0
EPRS	NaN	0
A	NaN	0
P4HB	NaN	0
PTMA	NaN	0
GLA	NaN	0
RPLP0	NaN	0
EIF2S1	NaN	0
HIST1H2AB	NaN	0
RPN2	NaN	0
TP53	NaN	0
HLA-A	NaN	0
GOT2	NaN	0
HPRT1	NaN	0
SOD1	NaN	0
CYB5R3	NaN	0
CLPTM1	NaN	0
BPNT1	NaN	0
ACSL3	NaN	0
SGPL1	NaN	0
PSMG1	NaN	0
AHSA1	NaN	0
PGM3	NaN	0
ENDOD1	NaN	0
ATP5L	NaN	0
FLOT1	NaN	0
ARL6IP5	NaN	0
EIF3G	NaN	0
RP2	NaN	0
CSDE1	NaN	0
PMPCB	NaN	0
MPDU1	NaN	0
GGCT	NaN	0
CPNE3	NaN	0
NOL3	NaN	0
CUTA	NaN	0
SMCA5	NaN	0
PRPSAP2	NaN	0
NARS	NaN	0
BUB3	NaN	0
PLRG1	NaN	0
TIMM44	NaN	0
TXNL1	NaN	0
HNRNPR	NaN	0
PRPF4	NaN	0
EIF3D	NaN	0
PPM1G	NaN	0
SURF4	NaN	0
MRPS12	NaN	0
ARPC2	NaN	0
SCAMP2	NaN	0
PFAS	NaN	0
HAT1	NaN	0
PSMA7	NaN	0
PRMT5	NaN	0
IRS4	NaN	0
PDXK	NaN	0
PPP6C	NaN	0
PSMD14	NaN	0
RTCA	NaN	0
IGF2BP3	NaN	0
SUPT5H	NaN	0
DDX39A	NaN	0
NUDT19	NaN	0
SMCHD1	NaN	0
ILVBL	NaN	0

## Sheet: CHP1
Gene name	Relative enrichment (CHP1)	Significance, -log p	Significant at FDR=0.05
CHP1	18.5573	4.68016	+
LUZP1	1.66593	1.70382
RAB27A	1.35985	1.83608
CNTLN	1.3231	1.16838
ERVFC1	1.17287	1.62344
LUC7L3	1.15145	1.1164
RSRC1	1.06929	1.04677
HMGA1	1.0588	0.930716
ST3GAL3	1.05123	1.49267
TXN	1.03113	0.8635
SRSF3	1.00648	1.44713
PPIL4	0.982786	1.37129
FAU	0.929848	1.27817
DDX23	0.924657	1.03127
PC	0.910675	0.86683
LLPH	0.903323	1.00572
GNAI2	0.887262	0
PCCA	0.87474	0.83862
MDK	0.871511	0.864444
TOP1	0.856723	1.27727
ANKHD1	0.815171	0.779745
HMGB2	0.800153	0.586217
TMA7	0.796205	0.713917
SRSF10	0.779178	1.05066
SRRM2	0.771764	0.266966
PRPF38B	0.768593	0.854033
ARGLU1	0.75747	0.765376
ABCB9	0.745155	0.98921
PRPF38A	0.735217	1.09002
MMP10	0.730567	1.01586
TRIP12	0.723683	0.928475
PGAM4	0.713082	0.863388
PLEC	0.702245	1.2529
H1FX	0.695005	0.846132
CWC22	0.687616	0.343299
PSMB1	0.686671	0.980565
RP9	0.677798	0.518627
MMTAG2	0.670462	0.549526
SOS1	0.667902	1.14799
AKAP17A	0.66313	0.531794
DDX42	0.65917	0.400798
LUC7L	0.644481	0
CLPX	0.642312	1.00643
EIF2A	0.639059	0.915271
C7orf55-LUC7L2	0.635878	0.89298
U2SURP	0.635742	0.701247
SRSF1	0.629864	0.439785
NOP56	0.624874	0.600666
SREK1	0.621855	0.737
U2AF2	0.580244	0.700025
NOP58	0.571686	0.46762
TOP	0.56792	0.477484
THOC2	0.555727	0.490335
EPRS	0.553738	0
ABCF1	0.552898	0.773016
ICA1L	0.544773	0.796993
RBM39	0.52855	0.830162
SERBP1	0.516055	0.628158
HMGN4	0.48977	0.516557
MCCC1	0.479792	0.58351
UBB	0.476585	0.542459
SNRNP27	0.474743	0.459038
ARL6IP4	0.467874	0.409406
SREK1IP1	0.459497	0.454344
TMEM263	0.456878	0.300745
MTDH	0.456799	0.308725
DIDO1	0.434038	0.370086
NOLC1	0.426147	0.356791
NKAPL	0.425402	0.510452
CHERP	0.412231	0.259487
SRSF11	0.411217	0.529854
RPL23A	0.409047	0.42379
CBX5	0.403726	0.335103
RPS28	0.394155	0.274849
RPS13	0.381212	0
TBC1D10B	0.373924	0.278899
CCNT1	0.370842	0
HN1L	0.367242	0.312533
EIF5A	0.339561	0.351123
PEPD	0.334816	0
CBX3	0.324391	0.118465
GRN	0.322999	0.334584
SFXN1	0.319976	0
SRSF12	0.317224	0.329837
RNPS1	0.317177	0.230579
NCL	0.313931	0.258618
NUCKS1	0.311241	0.17094
MED1	0.306834	0.206801
SRSF2	0.298183	0.181794
PPIB	0.287957	0.291054
HIST2H2BF	0.273536	0.22315
ILF3	0.266093	0.16025
PLD3	0.26584	0.162708
EDF1	0.2645	0.176878
CAD	0.253167	0.339006
LTV1	0.247375	0.160067
ZNF207	0.246386	0.258627
HMGA2	0.244859	0.118307
RABL6	0.232596	0.189597
CCDC124	0.222853	0.169052
PSMB3	0.219275	0
RBMX2	0.212939	0.195691
SRSF7	0.202039	0.156295
HMGA1	0.201913	0.165512
STEAP1	0.197692	0.172071
RPL4	0.189765	0.258506
DEK	0.185966	0.156116
U2AF2	0.174938	0.204067
PPM1G	0.172923	0
FKBP12-Exin	0.170599	0.102189
HIST1H2BO	0.165711	0.0873825
SFPQ	0.165223	0.245374
HIST1H1D	0.158846	0.13942
C19orf53	0.151775	0.078221
FUS	0.125642	0.0814966
DDX21	0.123536	0.103814
PPIA	0.122361	0.0824626
RSRC2	0.0997312	0.0823461
TRIM25	0.0776132	0.0772004
HNRNPM	0.0710105	0.084447
RPL29	0.0681229	0.0481866
C9orf78	0.0680679	0.0357494
ELOF1	0.0672874	0.0480277
MAPK1IP1L	0.062544	0.0474967
PRPF40A	0.0619569	0.0495256
TXNDC5	0.0529485	0.057703
HMGB1	0.0377967	0.0128085
TRA2B	0.034092	0.0121631
CPSF6	0.0318819	0.0226417
RBMX	0.0299462	0.0169396
PSIP1	0.0152843	0.0107283
HMGN2	0.00223421	0.00153861
HSPA8	0.00187332	0.00196095
TDRD9	-0.00566839	0
EIF3A	-0.0184864	0
H3BRB0	-0.0300973	0.019595
TCOF1	-0.0313641	0.019678
HSPA5	-0.0337827	0.083426
CKAP4	-0.0468428	0
HDGFRP3	-0.0484083	0.0463607
CKB	-0.0575022	0.0351672
SUB1	-0.0747647	0.0348174
NSRP1	-0.090053	0.0517699
TPI1	-0.0913851	0.0621731
RPS25	-0.0975126	0.0552611
PHF3	-0.105012	0.0873496
DKC1	-0.118088	0.11819
COX17	-0.122285	0.0679144
UCHL1	-0.139548	0
SART1	-0.145553	0.097759
ALYREF	-0.146773	0.111084
HIST1H1C	-0.154786	0.100593
NIPBL	-0.159251	0.104796
WDR33	-0.176487	0.0895751
TAGLN2	-0.184842	0
SRSF6	-0.185049	0.158332
SRRM1	-0.189298	0.095204
FIP1L1	-0.191257	0.201293
NSDHL	-0.191493	0.332293
SUMO2	-0.191785	0.154329
NOP2	-0.19858	0.18503
DDX46	-0.200297	0.0421408
CDK12	-0.203362	0.127157
EIF5B	-0.21195	0.107019
PTN	-0.217179	0.123482
RPS21	-0.23252	0.148175
DCD	-0.245024	0.155214
HNRNPAB	-0.262505	0
KRR1	-0.278526	0
AHSA1	-0.278727	0
PABPC1	-0.278966	0.303033
CRIPT	-0.285644	0
ATP5F1	-0.285695	0
H2AFY	-0.287435	0.128065
HNRNPK	-0.29738	0.152968
RDX	-0.311922	0.445924
AP3D	-0.336283	0.177136
SPTBN1	-0.349326	0
HNRNPR	-0.350598	0.794856
DNAJA1	-0.37542	0.482044
ACO2	-0.384632	0
RTCB	-0.385429	0.41528
SOD1	-0.39113	0.28396
NME1-	-0.393152	0.314747
PSMC2	-0.397285	0
PRDX1	-0.405264	0.34491
PNN	-0.405481	0.203822
HNRNPA3	-0.4099	0.292933
HNRNPH1	-0.418192	0.300693
CIR1	-0.42102	0.268998
U2AF1L5	-0.423309	0.528213
BOLA2	-0.43497	0.287492
SEC61B	-0.436109	0.387534
FHL1	-0.437969	0
PFN1	-0.439587	0.268535
PRDX3	-0.449072	0.312787
H2AFJ	-0.45208	0.279052
SRRM2	-0.460937	0.324803
PRPF4B	-0.462481	0.301491
APEX1	-0.463632	0
ACIN1	-0.467798	0.358287
KHDRBS1	-0.478469	0.354569
SNRNP70	-0.480702	0.307707
RPL24	-0.494911	0.314527
EIF3D	-0.521711	0.351303
DDX17	-0.548668	0.585583
MANF	-0.554331	0.178573
ACTG1	-0.558303	0.761626
HNRNPA2B1	-0.564273	1.1127
MT-CO2	-0.565733	0
RPS8	-0.576585	0.234262
EBNA1BP2	-0.578813	0
RPL36A-HNRNPH2	-0.582087	0.403553
CRKL	-0.582207	0.403669
CARHSP1	-0.59987	0.59779
BRD4	-0.601945	0.439454
TRAP1	-0.602823	0
SAFB	-0.608881	0
ALDH18A1	-0.613202	0
HIST1H4A	-0.616574	0.355866
NUFIP2	-0.629568	0.787998
CCT5	-0.635344	0
RL26	-0.661196	0.366458
CCT3	-0.671171	0.801718
HSP	-0.671186	0.881544
HIST1H2AB	-0.676794	0.877341
RPS26P11	-0.68398	0.857394
KHSRP	-0.691375	0
H2BFS	-0.699649	0
HIST3H3	-0.712692	0.90638
HSPD1	-0.71403	0
BRD3	-0.715183	0
PRDX4	-0.721513	1.21685
RPL14	-0.741045	0.879538
ANXA2	-0.764192	0
HNRNPUL1	-0.792976	0
GLO1	-0.797517	0.568401
ATP5B	-0.80399	0.505648
RBBP4	-0.809761	0.843363
SSRP1	-0.819592	0.636667
ELAVL1	-0.820141	0.513431
CD81	-0.833727	0
RPS24	-0.856227	0.405553
PCBP2	-0.866681	0
PDIA3	-0.880625	0
RPL38	-0.887086	1.11964
VDAC2	-0.8888	0.623512
RPL10A	-0.896857	0
GGCT	-0.939948	0
RPL31	-0.954092	1.34416
EZR	-0.95909	0
CTSD	-0.959664	0.711652
HMGN3	-0.982135	0.486829
RPS16	-0.997326	1.0491
VARS	-0.999833	0
RPL7A	-1.06276	0.90077
EIF3G	-1.06712	0
EEF1A1P5	-1.06944	0.739812
PPIG	-1.07532	0.335181
ALDH9A1	-1.09995	0
HSPA9	-1.1033	0
CLIC4	-1.11136	0
ACTC1	-1.13649	1.34725
RPL22	-1.13666	1.40269
HIST2H3PS2	-1.14613	1.78584
RPL7	-1.15056	1.07067
RBBP7	-1.15163	0
RPS9	-1.15681	1.99697
PRDX2	-1.16448	0.620674
RPL17	-1.16832	0
RPL18	-1.18353	0.883045
VIM	-1.1844	1.09683
GLUD1	-1.18469	0
HIST3H2BB	-1.20318	0
AIFM2	-1.22582	0.0908535
RPL9	-1.2319	0.812302
ACOT7	-1.24241	0
RACK1	-1.24663	0.615026
RPL10	-1.248	0
NONO	-1.26778	0.575218
IGF2BP1	-1.26782	1.13966
RPL1	-1.27478	0
TUBA1C	-1.28063	0.978376
MIF	-1.28812	1.2056
GAPDH	-1.30284	1.16451
HNRNPU	-1.30662	0.781184
RPS27L	-1.31805	0
PRMT1	-1.32463	0
TARDBP	-1.38361	0.943169
RPL6	-1.40564	0.672835
SRP14	-1.42335	0
ENO1	-1.42457	0.981048
ALDO	-1.42867	0.738718
UBA1	-1.43232	0.942779
RPL13	-1.43333	1.4917
CAP1	-1.43512	0
TUBA4A	-1.43891	1.45467
CCT7	-1.45011	0.718357
PARP1	-1.47427	0.492569
EIF4A1	-1.51869	0.931538
FLNA	-1.52375	1.34283
RPS20	-1.52788	1.27373
HSP90AB2P	-1.5459	0
RPL27	-1.55817	1.58035
RPS3A	-1.56601	1.65839
PTBP1	-1.56747	0.96736
HNRNPA0	-1.57426	1.10422
RCC2	-1.58018	0.836088
PCBP1	-1.58203	1.08629
HNRNPL	-1.5943	0.897803
CFL1	-1.59621	2.17534
RPL21	-1.61771	1.08408
VDAC1	-1.62079	0.796586
CYB5R3	-1.62506	0
HMGN1	-1.63129	1.18149
RPL27A	-1.63258	1.78711
RPL12	-1.63859	0.857632
ATP5A1	-1.63925	1.06434
NPM1	-1.64413	1.9534
RPS7	-1.64525	1.08577
SLI	-1.64843	0
PSMA4	-1.64886	0
RPS12	-1.68485	0
RPL13	-1.69087	1.41115
TXNL1	-1.697	0
HNRNPA1	-1.70338	1.90306
HSP90AB1	-1.70423	1.85222
GDI2	-1.75414	0
FSCN1	-1.77705	0.771586
ARF3	-1.77887	0.308762
SLC25A5	-1.77916	0
PHB2	-1.80084	0
PGK1	-1.80277	1.55046
PSMB5	-1.80328	1.09846
WDR1	-1.81181	0
TCEB3	-1.82043	0
CCT6A	-1.82184	0
FASN	-1.82433	0.828844
DLD	-1.82955	0.847896
PKM	-1.83158	1.18904
SNRPD2	-1.8423	0
RPL3	-1.84583	0.95625
NKTR	-1.84777	0
CDC42	-1.85736	0
PA2G4	-1.85997	1.12373
SNRPD1	-1.87739	1.28076
FBL	-1.88947	0
TUBB	-1.91889	1.47582
TUBB4B	-1.93255	1.62302
GANAB	-1.94202	0
TRA2A	-1.96064	0
DHX9	-1.97365	1.41193
GPI	-1.98206	0.951384
YWHAE	-1.98785	0
CCT4	-1.99383	0
HNRNPC	-1.99703	1.06714
LDHA	-2.00079	0.932484
CAPZB	-2.00971	0
XRCC6	-2.02457	1.25991
RPL8	-2.03054	1.22909
KRT18	-2.04162	1.24103
ARHGDIA	-2.06122	0
RAB1B	-2.07137	0
LDHB	-2.11697	1.33539
GNAO1	-2.12519	0.279038
RPS3	-2.12728	0.807954
SLC25A4	-2.12979	1.3718
RPS14	-2.16943	1.23218
DDX3X	-2.19664	1.0301
AHCY	-2.21417	1.65005
RAN	-2.21981	1.13862
EEF2	-2.2338	1.199
RPS4X	-2.2438	2.20642
VCP	-2.25956	0
RPL11	-2.26202	1.75963
HSD17B10	-2.28155	1.10198
TCPA	-2.3335	1.29274
RPS15A	-2.33745	1.09078
CLTC	-2.35549	1.24029
HSP90B1	-2.3737	2.43866
SNRNP200	-2.37856	2.38649
ACAT2	-2.39008	0
DDX39B	-2.39751	1.54105
RPL34	-2.40298	0
MYH9	-2.41113	1.67133
RPN1	-2.41634	0
RPS23	-2.43521	1.31553
PSMC1	-2.50482	0.280517
RPL23	-2.51413	1.35094
TUFM	-2.57823	1.11004
GNB1	-2.58848	0
PRDX6	-2.58938	0
TKT	-2.65804	1.44698
RAB6A	-2.66107	2.18095
RPS2	-2.7395	1.98405
PAICS	-2.79431	0
RPL28	-2.82555	1.2224
RPS11	-2.91758	1.68145
MDH2	-3.03145	1.7557
EEF1G	-3.12604	2.08757
SERF2	-3.41872	0
BASP1	-3.7403	0
HSP90AA1	-3.7529	0
ACLY	-3.75802	3.0578
SRC	-4.16732	0
RP2	-4.95853	0
AP1S2	NaN	0
GNAO1	NaN	0
THOC2	NaN	0
PSMC1	NaN	0
SPCS1	NaN	0
COPG1	NaN	0
PSAT1	NaN	0
SRPRB	NaN	0
SUPT16H	NaN	0
YTHDF2	NaN	0
HBS1L	NaN	0
STRAP	NaN	0
PPIL1	NaN	0
DRG1	NaN	0
FARSA	NaN	0
RUVBL1	NaN	0
EIF3L	NaN	0
HIGD1A	NaN	0
PIN4	NaN	0
RUVBL2	NaN	0
G3BP2	NaN	0
PRPF19	NaN	0
CORO1C	NaN	0
MCTS1	NaN	0
RAB21	NaN	0
RALY	NaN	0
NUDT5	NaN	0
STOML2	NaN	0
2009-09-01	NaN	0
HMGXB4	NaN	0
TES	NaN	0
NIPSNAP3A	NaN	0
UBA2	NaN	0
VPS29	NaN	0
nef	NaN	0
LARS	NaN	0
HACD3	NaN	0
MAT2B	NaN	0
MTCH1	NaN	0
TECR	NaN	0
2011-09-01	NaN	0
FAM49B	NaN	0
SMC4	NaN	0
PHPT1	NaN	0
OSTC	NaN	0
AASDHPPT	NaN	0
TIGAR	NaN	0
EXOSC4	NaN	0
SARS2	NaN	0
VTA1	NaN	0
CACYBP	NaN	0
C12orf10	NaN	0
NRDE2	NaN	0
RPF2	NaN	0
RNPEP	NaN	0
ILKAP	NaN	0
GTPBP4	NaN	0
MRPL13	NaN	0
AP1M1	NaN	0
HINT2	NaN	0
TUBB2B	NaN	0
PSMG3	NaN	0
ESYT1	NaN	0
SRSF8	NaN	0
CPPED1	NaN	0
WDR77	NaN	0
ELAC2	NaN	0
PARK7	NaN	0
TBCB	NaN	0
RBM15	NaN	0
PPP1R10	NaN	0
RBM14	NaN	0
PGAM5	NaN	0
SNRNP40	NaN	0
ARL8A	NaN	0
MAGOH	NaN	0
MYDGF	NaN	0
EMG1	NaN	0
UFD1L	NaN	0
RAD50	NaN	0
ARPC1A	NaN	0
AP3S1	NaN	0
PSMF1	NaN	0
DDX1	NaN	0
BRIX1	NaN	0
HM13	NaN	0
PNPT1	NaN	0
NUP43	NaN	0
BOD1L1	NaN	0
COLGALT1	NaN	0
CDKN2A	NaN	0
NUP93	NaN	0
KATNAL2	NaN	0
ARL17B	NaN	0
TMED7	NaN	0
THOC6	NaN	0
ZC3H18	NaN	0
CENPV	NaN	0
YTHDF3	NaN	0
ZC3HAV1	NaN	0
SND1	NaN	0
PRPF8	NaN	0
ZC3H13	NaN	0
HSP90AB4P	NaN	0
TIMM50	NaN	0
TUBB8	NaN	0
SMU1	NaN	0
IMMT	NaN	0
UGP2	NaN	0
HIST2H2AA3	NaN	0
SYPL1	NaN	0
DPYSL2	NaN	0
DDB1	NaN	0
ADRM1	NaN	0
2007-09-01	NaN	0
NEDD8	NaN	0
SLC1A5	NaN	0
TRIP13	NaN	0
SF3B3	NaN	0
RAB	NaN	0
PWP2	NaN	0
PTGES3	NaN	0
PPA1	NaN	0
EBP	NaN	0
PAFAH1B3	NaN	0
PDIA6	NaN	0
EFTUD2	NaN	0
2002-09-01	NaN	0
SPCS2	NaN	0
RAB39A	NaN	0
LBR	NaN	0
MESDC2	NaN	0
LAGE3	NaN	0
MCM6	NaN	0
FLOT2	NaN	0
DYNC1H1	NaN	0
MLEC	NaN	0
HNRNPD	NaN	0
IDI1	NaN	0
TUBB2A	NaN	0
HDAC1	NaN	0
DYNC1I2	NaN	0
EIF3I	NaN	0
PABPC4	NaN	0
TRIM28	NaN	0
PSMD2	NaN	0
MTAP	NaN	0
CHAF1B	NaN	0
ACACA	NaN	0
ECH1	NaN	0
PPP1R8	NaN	0
LMAN2	NaN	0
AIM	NaN	0
TWF1	NaN	0
NSUN2	NaN	0
LG3BP	NaN	0
GFPT1	NaN	0
EEF1A2	NaN	0
CSTF1	NaN	0
PLP2	NaN	0
YWHAH	NaN	0
SLC25A11	NaN	0
FKBP4	NaN	0
HMGCS1	NaN	0
SLC25A3	NaN	0
RHOG	NaN	0
ARF5	NaN	0
PRKDC	NaN	0
CCT	NaN	0
PAFAH1B2	NaN	0
DYNLL1	NaN	0
YWHAZ	NaN	0
RAC1	NaN	0
RPL11	NaN	0
RPL32	NaN	0
RPL	NaN	0
GNB2	NaN	0
RAB1	NaN	0
RPS6	NaN	0
ETF1	NaN	0
RAB11A	NaN	0
SNRPD3	NaN	0
SNRPF	NaN	0
SNRPE	NaN	0
PSMC5	NaN	0
NCS1	NaN	0
PPP1CA	NaN	0
RRAS2	NaN	0
WDR5	NaN	0
DAD1	NaN	0
B2M	NaN	0
HSPE1	NaN	0
RHOC	NaN	0
RPL37A	NaN	0
RPL15	NaN	0
RAP1B	NaN	0
ABCE1	NaN	0
RAB14	NaN	0
UBE2D3	NaN	0
RAB10	NaN	0
RAB5B	NaN	0
RAB	NaN	0
RAB8A	NaN	0
DSTN	NaN	0
PSMA6	NaN	0
PRPS1	NaN	0
ARPC4-TTLL3	NaN	0
EPPK1	NaN	0
EIF6	NaN	0
MARS	NaN	0
ATP5J2	NaN	0
EIF3B	NaN	0
NPEPPS	NaN	0
SEC13	NaN	0
DRG2	NaN	0
PSMD4	NaN	0
USP14	NaN	0
SLC16A1	NaN	0
COPA	NaN	0
SUCLG1	NaN	0
BLVRA	NaN	0
CAPZA1	NaN	0
POLR2H	NaN	0
KPNA2	NaN	0
PGD	NaN	0
VAMP7	NaN	0
PSMD7	NaN	0
HSD17B4	NaN	0
HCFC1	NaN	0
BCAP31	NaN	0
SSR4	NaN	0
RAB7A	NaN	0
RAB5C	NaN	0
CCT8	NaN	0
SERPINH1	NaN	0
RBM25	NaN	0
TMED10	NaN	0
MCM2	NaN	0
PPM1F	NaN	0
LMAN1	NaN	0
ARCN1	NaN	0
PREP	NaN	0
UQCRFS1P1	NaN	0
QARS	NaN	0
CAPZA2	NaN	0
RPS5	NaN	0
RPL5	NaN	0
RECQL	NaN	0
USP5	NaN	0
PAFAH1B1	NaN	0
ACAA2	NaN	0
CASP3	NaN	0
STAT1	NaN	0
TMPO	NaN	0
IARS	NaN	0
GARS	NaN	0
NAA10	NaN	0
EIF2S3L	NaN	0
HADHA	NaN	0
MDH1	NaN	0
DDOST	NaN	0
EIF4A3	NaN	0
TALDO1	NaN	0
PPP1CC	NaN	0
ATP5C1	NaN	0
COPB2	NaN	0
SERPINB6	NaN	0
PHB	NaN	0
PFN2	NaN	0
HSPA4	NaN	0
SHMT2	NaN	0
MCM7	NaN	0
MC	NaN	0
MCM4	NaN	0
ATIC	NaN	0
UQCRC1	NaN	0
MAT2A	NaN	0
SDHA	NaN	0
ADSS	NaN	0
NMT1	NaN	0
C21orf33	NaN	0
PSMB6	NaN	0
PSMB4	NaN	0
CANX	NaN	0
CALR	NaN	0
RPA1	NaN	0
TARS	NaN	0
DDX6	NaN	0
MSN	NaN	0
PSMA3	NaN	0
PSMA2	NaN	0
MCM3	NaN	0
ACAT1	NaN	0
RRM1	NaN	0
EIF4B	NaN	0
WARS	NaN	0
GART	NaN	0
OSBP	NaN	0
CSRP1	NaN	0
M6PR	NaN	0
SRM	NaN	0
EIF2AK2	NaN	0
HK1	NaN	0
RCC1	NaN	0
SON	NaN	0
RPL3	NaN	0
DDX5	NaN	0
CTPS1	NaN	0
GOT1	NaN	0
HSPA7	NaN	0
ATP2A2	NaN	0
CBR1	NaN	0
RPA2	NaN	0
GSPT1	NaN	0
AKR1B1	NaN	0
DARS	NaN	0
SNRPB	NaN	0
AKR1A1	NaN	0
ETFA	NaN	0
PDIA4	NaN	0
RNH1	NaN	0
XRCC5	NaN	0
gag	NaN	0
IMPDH2	NaN	0
PCNA	NaN	0
PRPS2	NaN	0
LAMP1	NaN	0
RALB	NaN	0
PDHB	NaN	0
ESD	NaN	0
ALDOC	NaN	0
LTA4H	NaN	0
SNRPA1	NaN	0
CNP	NaN	0
GSTP1	NaN	0
RPSA	NaN	0
GNAI3	NaN	0
PDHA1	NaN	0
A	NaN	0
P4HB	NaN	0
PTMA	NaN	0
GLA	NaN	0
RPLP0	NaN	0
EIF2S1	NaN	0
ATP1A1	NaN	0
RPN2	NaN	0
TP53	NaN	0
HLA-A	NaN	0
ABL1	NaN	0
GOT2	NaN	0
HPRT1	NaN	0
PNP	NaN	0
TOMM40	NaN	0
CLPTM1	NaN	0
BPNT1	NaN	0
AIFM1	NaN	0
ACSL3	NaN	0
SGPL1	NaN	0
PSMG1	NaN	0
PGM3	NaN	0
ENDOD1	NaN	0
RSL1D1	NaN	0
ATP5L	NaN	0
FLOT1	NaN	0
ARL6IP5	NaN	0
CSDE1	NaN	0
PMPCB	NaN	0
MPDU1	NaN	0
CPNE3	NaN	0
NOL3	NaN	0
CUTA	NaN	0
CCNT2	NaN	0
SMCA5	NaN	0
PRPSAP2	NaN	0
NARS	NaN	0
BUB3	NaN	0
PLRG1	NaN	0
TIMM44	NaN	0
PSMD3	NaN	0
PRPF4	NaN	0
DHX15	NaN	0
EIF3H	NaN	0
SURF4	NaN	0
MRPS12	NaN	0
ARPC2	NaN	0
SCAMP2	NaN	0
PFAS	NaN	0
HAT1	NaN	0
PSMA7	NaN	0
PRMT5	NaN	0
IRS4	NaN	0
PDXK	NaN	0
PPP6C	NaN	0
PSMD14	NaN	0
RTCA	NaN	0
IGF2BP3	NaN	0
CLIC1	NaN	0
SUPT5H	NaN	0
DDX39A	NaN	0
NACA	NaN	0
NUDT19	NaN	0
SMCHD1	NaN	0
ILVBL	NaN	0

## Sheet: GNAI2
Gene name	Relative enrichment (GNAI2)	Significance, -log p	Significant at FDR=0.05
GNAI2	20.5464	16.8564	+
GNAI3	15.1331	7.90741	+
GNAO1	7.4198	3.16924	+
SNRPD2	2.6037	2.70841
RPL3	2.21172	0.997608
RPL34	2.0055	1.02736
RPS14	1.9537	1.11837
RPL8	1.83809	1.01654
WDR5	1.81637	1.64002
LDHA	1.72213	0.80795
NONO	1.70624	0.876183
LDHB	1.67653	1.0787
SON	1.61937	0
RPL11	1.56528	1.00116
RPL23	1.54578	0.702667
ANKHD1	1.51662	0
DDX3X	1.48736	0.792493
VDAC2	1.46161	1.0337
MDH2	1.45882	0.672306
ALDO	1.43607	0.779334
SNRPB	1.43048	1.09862
SUMO2	1.3682	2.18029
CKAP4	1.34932	1.30008
FLNA	1.33866	1.10551
RPL28	1.33658	0.573553
HNRNPA0	1.31567	0.908988
RP9	1.26361	1.24879
TUFM	1.2609	0.4297
DIDO1	1.23696	0
COPB2	1.2289	0.946763
SLC25A11	1.2138	1.00256
ENO1	1.21117	0.873314
RAC1	1.20623	0.560553
UBB	1.20073	2.16965
FKBP12-Exin	1.19551	1.12614
CNTLN	1.19137	0
RPL13	1.19131	0.791341
RPL	1.18734	0.952067
RAB10	1.18188	1.1165
CWC22	1.17726	0.797285
PTN	1.17144	0.775686
PARP1	1.14652	0.458304
RPL5	1.13834	0.331112
CIR1	1.1213	0
TCPA	1.10305	0.436123
ATP5A1	1.07078	0.589709
HIST3H2BB	1.04672	0.988632
PKM	1.03931	0.596108
RPS4X	1.03738	0.725426
CAPZB	1.03413	0.802759
MIF	1.01001	0.948564
RPS11	0.99906	0.351401
GGCT	0.990269	0
TBC1D10B	0.978695	1.04239
TUBB4B	0.957847	0.607358
RAB6A	0.952966	0.439992
ILKAP	0.952896	0
SLC25A3	0.927505	0.568942
HSD17B4	0.907016	0.6066
SERF2	0.895517	0.767078
HNRNPL	0.895441	0.413822
SLC25A5	0.876607	0.676546
RPS2	0.864323	0.387336
NRDE2	0.859909	0
PSMD14	0.847653	0
NPM1	0.84647	0.724109
HMGN3	0.842325	0.459803
RPS20	0.832774	0.55394
RPS23	0.829328	0.303181
DDX42	0.829304	0
RPL1	0.825596	0.372911
RPS24	0.809931	0.433447
DHX9	0.787188	0.367226
PA2G4	0.778885	0.444636
RAB7A	0.759548	0.564078
HSP90AA1	0.754076	0.307462
RPL22	0.753128	0.546269
RPS12	0.7493	0.676495
SRRM2	0.748576	0.240704
RPL15	0.746881	0.35522
AIFM1	0.744103	0.32214
HNRNPH1	0.743187	0.613286
RAB21	0.741452	0.776005
RSL1D1	0.73305	0.845811
EIF2S3L	0.730709	0.298973
MMTAG2	0.728256	0.833325
RAN	0.723938	0.253034
TIGAR	0.717248	0
BRD3	0.712267	0.468119
RPS6	0.71207	0.267471
TES	0.708855	0.888653
NAA10	0.707208	0.681841
MPDU1	0.704581	0.678069
RPL21	0.704196	0.350405
GAPDH	0.700528	0.478397
CDC42	0.698238	0.311196
PPIA	0.697868	0.724858
THOC2	0.678105	0.625978
ST3GAL3	0.673354	0.697533
HMGA2	0.670332	0.569521
C19orf53	0.66544	0.444307
PGK1	0.661053	0.407505
CARHSP1	0.659609	0.559587
SSR4	0.659591	0.466586
HIST1H2BO	0.65859	0.450946
CDK12	0.65464	0.519089
SERBP1	0.653929	0.646278
PTGES3	0.653419	0.702067
RPL10	0.651587	0.68493
RPL12	0.649255	0.262753
DKC1	0.647222	1.01805
SEC61B	0.645603	0.627718
TUBA4A	0.644719	0.517619
CCNT2	0.641237	0
ALDH18A1	0.640009	0.544061
NCL	0.633354	0.664075
RRAS2	0.632313	0
HNRNPA1	0.630998	0.442077
CTSD	0.628163	0.55963
DHX15	0.625434	0
HMGN4	0.623957	0.738557
U2AF2	0.619714	1.00663
HN1L	0.61839	0.588166
TUBB	0.615745	0.31521
RPS3A	0.61499	0.562622
PCBP1	0.614661	0.306791
HM13	0.610848	0.590741
HSP	0.605264	0.785213
RPL9	0.600032	0.299336
RAB14	0.59935	0.286755
EDF1	0.598144	0.474678
ATP5B	0.597369	0.444074
SRSF12	0.592577	0
HCFC1	0.590848	0
TRA2A	0.584155	0.142641
HMGN1	0.580243	0.270236
G3BP2	0.576595	0.767001
AKAP17A	0.575924	0.429969
VIM	0.575774	0.383742
NSUN2	0.573788	0
MCM6	0.564689	0
PHB	0.564257	0.471151
PRPSAP2	0.562369	0
CACYBP	0.562094	0
GOT2	0.55805	0
PNP	0.556404	0
RPS9	0.552238	0.894625
HSP90AB1	0.550567	0.35622
WDR1	0.542229	0.464035
PSMB5	0.539026	0.218307
2007-09-01	0.536884	0.242272
SNRNP70	0.533901	0.332722
H1FX	0.530168	0.567226
VDAC1	0.528943	0.24766
U2AF1L5	0.527474	0.684861
PRPS2	0.520449	0
EEF1A1P5	0.514885	0.298254
PPP1R8	0.514422	0
ZNF207	0.50456	0
PGD	0.502277	0.329068
PHPT1	0.497304	0
MC	0.496664	0.854472
SUCLG1	0.491609	0
ARF5	0.487612	0.424228
DDX39B	0.487267	0.189758
EEF2	0.485991	0.157747
NOLC1	0.485149	0.411967
AP1S2	0.477885	0
RAB5B	0.475356	0
HSPA9	0.474271	0.479562
FSCN1	0.468763	0.139073
SRPRB	0.468506	0.357849
OSBP	0.463408	0
RCC2	0.463389	0.173243
RPL6	0.445355	0.160605
RPS8	0.440613	0.167044
ACTG1	0.43938	0.539489
RPS3	0.438525	0.142197
H3BRB0	0.436684	0.364048
ARL6IP4	0.432589	0.355223
TARS	0.430217	0.244573
RHOC	0.425662	0.222835
RAB1	0.419266	0.13016
RAB5C	0.417728	0.178869
PFN1	0.414098	0.248054
RPS26P11	0.408767	0.326167
ARGLU1	0.407099	0.324848
DDX21	0.406202	0.452981
PDIA3	0.403116	0.441798
STEAP1	0.398908	0.395863
HNRNPU	0.397447	0.166216
XRCC5	0.397333	0.173717
NSRP1	0.396549	0.265325
CLPX	0.389513	0.473946
HSPA5	0.389132	2.04148
ABCF1	0.382352	0.465685
VCP	0.380727	0.15597
CBR1	0.379591	0
PTBP1	0.376778	0.164826
HNRNPM	0.37583	0.588212
BCAP31	0.372925	0.225696
RPL3	0.372811	0.280795
CFL1	0.369545	0.285527
SOD1	0.368912	0.252537
CRKL	0.368853	0.19122
EIF4A1	0.365577	0.151016
SREK1	0.364116	0.352584
RPN2	0.363659	0
UCHL1	0.362585	0.193786
H2BFS	0.359634	0.146061
CBX5	0.351444	0.288399
RPS15A	0.348587	0.15307
UBE2D3	0.348575	0.269239
CENPV	0.348236	0
CHERP	0.347963	0.200583
RHOG	0.346703	0
TMED7	0.344739	0
EIF3G	0.343292	0.296797
TIMM50	0.338478	0.386402
DDX17	0.337025	0.375567
XRCC6	0.333938	0.121475
SMU1	0.332029	0.279386
HIST3H3	0.331281	0.307061
PHB2	0.330202	0.153471
ATP5C1	0.330181	0.628002
TKT	0.328816	0.119989
PPA1	0.328805	0.401444
U2SURP	0.327526	0.280207
NUDT5	0.327334	0
HNRNPAB	0.326756	0.276789
SRSF6	0.32619	0.303432
NSDHL	0.321471	0.592249
KHDRBS1	0.31728	0.204409
HNRNPC	0.315341	0.121254
ERVFC1	0.313716	0.241734
NIPBL	0.311952	0.282645
SLC25A4	0.309937	0.11074
NME1-	0.308435	0.221484
GRN	0.305968	0.298129
EIF3H	0.304649	0.127855
PRDX1	0.30229	0.265062
ARCN1	0.301571	0.146998
SRSF3	0.300828	0.261877
DEK	0.300186	0.278285
RPL29	0.299307	0.252005
ACTC1	0.296018	0.211297
HSP90B1	0.294979	0.166817
BUB3	0.294289	0
PLD3	0.29374	0.215728
RPLP0	0.293487	0.324037
TCOF1	0.291644	0.168621
CCT7	0.288553	0.124611
KATNAL2	0.2852	0.249085
RPL31	0.282771	0.299227
EIF2S1	0.281177	0.155079
SF3B3	0.280672	0.115285
ACIN1	0.280258	0.182517
RAB39A	0.27839	0
PIN4	0.277913	0.174665
SNRPD3	0.277186	0.233493
[truncated: 549 more rows]

## Sheet: GNAI3
Gene name	Relative enrichment (GNAI3)	Significance, -log p	Significant at FDR=0.05
[truncated: 809 more rows]

[truncated: 11 more sheets: GNAO1, HIV Nef, HIV p17, FAM49B, NCS1, ARF1, NOL3, ARL17B, BASP1, ABL1, RP2]
